# Supplementary material for: Molecular Cartography of the Human and Mouse Down Syndrome Brain
Source: Research Square preprint supplement (doi:10.21203/rs.3.rs-5374449/v1), 2024-11-14
Supplement: Supplementary file 1 [file 1286131d0fd0baeecd9214d1.xlsx]

## Sheet: P0_CC_Upregulated_in DS
source	target	ligand	receptor	prob	pval	interaction_name	interaction_name_2	pathway_name	annotation	evidence	datasets	ligand.logFC	ligand.pct.1	ligand.pct.2	ligand.pvalues	receptor.logFC	receptor.pct.1	receptor.pct.2	receptor.pvalues
Microglia_2	Vasc_2	Wnt7a	FZD4_LRP5	1.44248e-05	0	WNT7A_FZD4_LRP5	Wnt7a - (Fzd4+Lrp5)	WNT	Secreted Signaling	KEGG: mmu04310; PMID: 23209147	ds	0.202503	12.5	1.5625	0.0154815	0.694956	39.9281	26.5487	0.0281802
Microglia_2	Astrocyte_2	Wnt7a	FZD7_LRP5	4.09953e-06	0	WNT7A_FZD7_LRP5	Wnt7a - (Fzd7+Lrp5)	WNT	Secreted Signaling	KEGG: mmu04310; PMID: 23209147	ds	0.202503	12.5	1.5625	0.0154815	1.35626	48.4305	32.9412	0.000195539
Microglia_2	Vasc_2	Wnt7a	FZD4_LRP6	6.19944e-06	0	WNT7A_FZD4_LRP6	Wnt7a - (Fzd4+Lrp6)	WNT	Secreted Signaling	KEGG: mmu04310; PMID: 23209147	ds	0.202503	12.5	1.5625	0.0154815	0.365432	22.3022	12.3894	0.0445
Microglia_2	Astrocyte_2	Wnt7a	FZD7_LRP6	1.19516e-06	0.01	WNT7A_FZD7_LRP6	Wnt7a - (Fzd7+Lrp6)	WNT	Secreted Signaling	KEGG: mmu04310; PMID: 23209147	ds	0.202503	12.5	1.5625	0.0154815	-0.660968	17.4888	29.4118	0.000604823
Astrocyte_1	Astrocyte_1	Mdk	Lrp1	0.00350839	0	MDK_LRP1	Mdk - Lrp1	MK	Secreted Signaling	PMID: 28356350	ds	1.38193	38.2353	19.8276	0.0022098	NA	NA	NA	NA
Astrocyte_1	Microglia_1	Mdk	Lrp1	0.00382371	0	MDK_LRP1	Mdk - Lrp1	MK	Secreted Signaling	PMID: 28356350	ds	1.38193	38.2353	19.8276	0.0022098	5.7928	60.8108	23.5294	5.68756e-05
Astrocyte_1	OPC_1	Mdk	Lrp1	0.00463517	0	MDK_LRP1	Mdk - Lrp1	MK	Secreted Signaling	PMID: 28356350	ds	1.38193	38.2353	19.8276	0.0022098	NA	NA	NA	NA
Astrocyte_1	Microglia_2	Mdk	Lrp1	0.00947591	0	MDK_LRP1	Mdk - Lrp1	MK	Secreted Signaling	PMID: 28356350	ds	1.38193	38.2353	19.8276	0.0022098	NA	NA	NA	NA
Astrocyte_1	Astrocyte_2	Mdk	Lrp1	0.0051452	0	MDK_LRP1	Mdk - Lrp1	MK	Secreted Signaling	PMID: 28356350	ds	1.38193	38.2353	19.8276	0.0022098	2.84269	85.6502	74.5098	4.39149e-05

## Sheet: P0_CC_Downregulated_in DS
source	target	ligand	receptor	prob	pval	interaction_name	interaction_name_2	pathway_name	annotation	evidence	datasets	ligand.logFC	ligand.pct.1	ligand.pct.2	ligand.pvalues	receptor.logFC	receptor.pct.1	receptor.pct.2	receptor.pvalues
OPC_1	Microglia_2	Wnt7a	FZD4_LRP5	1.094e-06	0	WNT7A_FZD4_LRP5	Wnt7a - (Fzd4+Lrp5)	WNT	Secreted Signaling	KEGG: mmu04310; PMID: 23209147	ctl	-0.283795	14.8036	20.5069	0.043703	-0.430599	1.78571	10.9375	0.0487473
Astrocyte_2	Microglia_2	Wnt7a	FZD4_LRP5	6.93752e-06	0	WNT7A_FZD4_LRP5	Wnt7a - (Fzd4+Lrp5)	WNT	Secreted Signaling	KEGG: mmu04310; PMID: 23209147	ctl	-0.491258	35.426	46.6667	0.0119529	-0.430599	1.78571	10.9375	0.0487473
OPC_1	Vasc_2	Wnt7a	FZD4_LRP5	1.59048e-06	0	WNT7A_FZD4_LRP5	Wnt7a - (Fzd4+Lrp5)	WNT	Secreted Signaling	KEGG: mmu04310; PMID: 23209147	ctl	-0.283795	14.8036	20.5069	0.043703	0.694956	39.9281	26.5487	0.0281802
Astrocyte_2	Vasc_2	Wnt7a	FZD4_LRP5	1.00858e-05	0	WNT7A_FZD4_LRP5	Wnt7a - (Fzd4+Lrp5)	WNT	Secreted Signaling	KEGG: mmu04310; PMID: 23209147	ctl	-0.491258	35.426	46.6667	0.0119529	0.694956	39.9281	26.5487	0.0281802
OPC_1	Astrocyte_2	Wnt7a	FZD8_LRP5	1.88742e-06	0	WNT7A_FZD8_LRP5	Wnt7a - (Fzd8+Lrp5)	WNT	Secreted Signaling	KEGG: mmu04310; PMID: 23209147	ctl	-0.283795	14.8036	20.5069	0.043703	1.16466	39.6861	24.5098	0.000132148
Astrocyte_2	Astrocyte_2	Wnt7a	FZD8_LRP5	1.19688e-05	0	WNT7A_FZD8_LRP5	Wnt7a - (Fzd8+Lrp5)	WNT	Secreted Signaling	KEGG: mmu04310; PMID: 23209147	ctl	-0.491258	35.426	46.6667	0.0119529	1.16466	39.6861	24.5098	0.000132148
OPC_1	Microglia_2	Wnt7a	FZD4_LRP6	5.3983e-07	0	WNT7A_FZD4_LRP6	Wnt7a - (Fzd4+Lrp6)	WNT	Secreted Signaling	KEGG: mmu04310; PMID: 23209147	ctl	-0.283795	14.8036	20.5069	0.043703	-0.430599	1.78571	10.9375	0.0487473
Astrocyte_2	Microglia_2	Wnt7a	FZD4_LRP6	3.42329e-06	0	WNT7A_FZD4_LRP6	Wnt7a - (Fzd4+Lrp6)	WNT	Secreted Signaling	KEGG: mmu04310; PMID: 23209147	ctl	-0.491258	35.426	46.6667	0.0119529	-0.430599	1.78571	10.9375	0.0487473
OPC_1	Vasc_2	Wnt7a	FZD4_LRP6	6.89385e-07	0	WNT7A_FZD4_LRP6	Wnt7a - (Fzd4+Lrp6)	WNT	Secreted Signaling	KEGG: mmu04310; PMID: 23209147	ctl	-0.283795	14.8036	20.5069	0.043703	0.365432	22.3022	12.3894	0.0445
Astrocyte_2	Vasc_2	Wnt7a	FZD4_LRP6	4.37168e-06	0	WNT7A_FZD4_LRP6	Wnt7a - (Fzd4+Lrp6)	WNT	Secreted Signaling	KEGG: mmu04310; PMID: 23209147	ctl	-0.491258	35.426	46.6667	0.0119529	0.365432	22.3022	12.3894	0.0445
OPC_1	Astrocyte_2	Wnt7a	FZD8_LRP6	1.62723e-06	0	WNT7A_FZD8_LRP6	Wnt7a - (Fzd8+Lrp6)	WNT	Secreted Signaling	KEGG: mmu04310; PMID: 23209147	ctl	-0.283795	14.8036	20.5069	0.043703	0.156046	24.2152	22.7451	0.00033679
Astrocyte_2	Astrocyte_2	Wnt7a	FZD8_LRP6	1.03189e-05	0	WNT7A_FZD8_LRP6	Wnt7a - (Fzd8+Lrp6)	WNT	Secreted Signaling	KEGG: mmu04310; PMID: 23209147	ctl	-0.491258	35.426	46.6667	0.0119529	0.156046	24.2152	22.7451	0.00033679
Astrocyte_2	Vasc_2	Vegfa	Flt1	0.000167825	0	VEGFA_VEGFR1	Vegfa - Vegfr1	VEGF	Secreted Signaling	KEGG: mmu04370; PMID: 16633338	ctl	-0.509988	30.9417	38.8235	0.0431654	NA	NA	NA	NA

## Sheet: P0_SVZ_Downregulated_in_DS
source	target	ligand	receptor	prob	pval	interaction_name	interaction_name_2	pathway_name	annotation	evidence	datasets	ligand.logFC	ligand.pct.1	ligand.pct.2	ligand.pvalues	receptor.logFC	receptor.pct.1	receptor.pct.2	receptor.pvalues
Vasc_2	NSC_2	Wnt7a	FZD5_LRP5	2.74594e-05	0	WNT7A_FZD5_LRP5	Wnt7a - (Fzd5+Lrp5)	WNT	Secreted Signaling	KEGG: mmu04310; PMID: 23209147	ctl	-0.356347	14.7849	21.6942	0.0114004	0.250177	24.6827	22.5322	0.00144347
Inhibitory_neuroblast	NSC_2	Wnt7a	FZD5_LRP5	5.98142e-05	0	WNT7A_FZD5_LRP5	Wnt7a - (Fzd5+Lrp5)	WNT	Secreted Signaling	KEGG: mmu04310; PMID: 23209147	ctl	-0.217949	22.1557	28.2546	0.000849296	0.250177	24.6827	22.5322	0.00144347
OPC_2	NSC_2	Wnt7a	FZD5_LRP5	3.83371e-05	0	WNT7A_FZD5_LRP5	Wnt7a - (Fzd5+Lrp5)	WNT	Secreted Signaling	KEGG: mmu04310; PMID: 23209147	ctl	-0.263771	14.4531	22.7273	0.0178458	0.250177	24.6827	22.5322	0.00144347
Vasc_2	TAP_2	Wnt7a	FZD5_LRP5	7.95216e-06	0	WNT7A_FZD5_LRP5	Wnt7a - (Fzd5+Lrp5)	WNT	Secreted Signaling	KEGG: mmu04310; PMID: 23209147	ctl	-0.356347	14.7849	21.6942	0.0114004	0.907313	46.2287	35.6971	5.25777e-05
Inhibitory_neuroblast	TAP_2	Wnt7a	FZD5_LRP5	1.73224e-05	0	WNT7A_FZD5_LRP5	Wnt7a - (Fzd5+Lrp5)	WNT	Secreted Signaling	KEGG: mmu04310; PMID: 23209147	ctl	-0.217949	22.1557	28.2546	0.000849296	0.907313	46.2287	35.6971	5.25777e-05
OPC_2	TAP_2	Wnt7a	FZD5_LRP5	1.11024e-05	0	WNT7A_FZD5_LRP5	Wnt7a - (Fzd5+Lrp5)	WNT	Secreted Signaling	KEGG: mmu04310; PMID: 23209147	ctl	-0.263771	14.4531	22.7273	0.0178458	0.907313	46.2287	35.6971	5.25777e-05
Vasc_2	NSC_2	Wnt7a	FZD8_LRP5	2.60471e-05	0	WNT7A_FZD8_LRP5	Wnt7a - (Fzd8+Lrp5)	WNT	Secreted Signaling	KEGG: mmu04310; PMID: 23209147	ctl	-0.356347	14.7849	21.6942	0.0114004	1.12196	34.6262	22.2103	3.73524e-07
Inhibitory_neuroblast	NSC_2	Wnt7a	FZD8_LRP5	5.67379e-05	0	WNT7A_FZD8_LRP5	Wnt7a - (Fzd8+Lrp5)	WNT	Secreted Signaling	KEGG: mmu04310; PMID: 23209147	ctl	-0.217949	22.1557	28.2546	0.000849296	1.12196	34.6262	22.2103	3.73524e-07
OPC_2	NSC_2	Wnt7a	FZD8_LRP5	3.63654e-05	0	WNT7A_FZD8_LRP5	Wnt7a - (Fzd8+Lrp5)	WNT	Secreted Signaling	KEGG: mmu04310; PMID: 23209147	ctl	-0.263771	14.4531	22.7273	0.0178458	1.12196	34.6262	22.2103	3.73524e-07
Vasc_2	TAP_2	Wnt7a	FZD8_LRP5	1.87723e-05	0	WNT7A_FZD8_LRP5	Wnt7a - (Fzd8+Lrp5)	WNT	Secreted Signaling	KEGG: mmu04310; PMID: 23209147	ctl	-0.356347	14.7849	21.6942	0.0114004	0.951957	36.1314	25.4808	2.6635e-05
Inhibitory_neuroblast	TAP_2	Wnt7a	FZD8_LRP5	4.08918e-05	0	WNT7A_FZD8_LRP5	Wnt7a - (Fzd8+Lrp5)	WNT	Secreted Signaling	KEGG: mmu04310; PMID: 23209147	ctl	-0.217949	22.1557	28.2546	0.000849296	0.951957	36.1314	25.4808	2.6635e-05
OPC_2	TAP_2	Wnt7a	FZD8_LRP5	2.62088e-05	0	WNT7A_FZD8_LRP5	Wnt7a - (Fzd8+Lrp5)	WNT	Secreted Signaling	KEGG: mmu04310; PMID: 23209147	ctl	-0.263771	14.4531	22.7273	0.0178458	0.951957	36.1314	25.4808	2.6635e-05
Vasc_2	NSC_3	Wnt7a	FZD8_LRP5	6.89362e-05	0	WNT7A_FZD8_LRP5	Wnt7a - (Fzd8+Lrp5)	WNT	Secreted Signaling	KEGG: mmu04310; PMID: 23209147	ctl	-0.356347	14.7849	21.6942	0.0114004	1.47771	54.9128	36.3987	1.8482e-11
Inhibitory_neuroblast	NSC_3	Wnt7a	FZD8_LRP5	0.000150155	0	WNT7A_FZD8_LRP5	Wnt7a - (Fzd8+Lrp5)	WNT	Secreted Signaling	KEGG: mmu04310; PMID: 23209147	ctl	-0.217949	22.1557	28.2546	0.000849296	1.47771	54.9128	36.3987	1.8482e-11
OPC_2	NSC_3	Wnt7a	FZD8_LRP5	9.62428e-05	0	WNT7A_FZD8_LRP5	Wnt7a - (Fzd8+Lrp5)	WNT	Secreted Signaling	KEGG: mmu04310; PMID: 23209147	ctl	-0.263771	14.4531	22.7273	0.0178458	1.47771	54.9128	36.3987	1.8482e-11
Vasc_2	NSC_4	Wnt7a	FZD8_LRP5	1.95217e-05	0	WNT7A_FZD8_LRP5	Wnt7a - (Fzd8+Lrp5)	WNT	Secreted Signaling	KEGG: mmu04310; PMID: 23209147	ctl	-0.356347	14.7849	21.6942	0.0114004	1.01342	43.6992	27.0983	0.00414046
Inhibitory_neuroblast	NSC_4	Wnt7a	FZD8_LRP5	4.25241e-05	0	WNT7A_FZD8_LRP5	Wnt7a - (Fzd8+Lrp5)	WNT	Secreted Signaling	KEGG: mmu04310; PMID: 23209147	ctl	-0.217949	22.1557	28.2546	0.000849296	1.01342	43.6992	27.0983	0.00414046
OPC_2	NSC_4	Wnt7a	FZD8_LRP5	2.7255e-05	0	WNT7A_FZD8_LRP5	Wnt7a - (Fzd8+Lrp5)	WNT	Secreted Signaling	KEGG: mmu04310; PMID: 23209147	ctl	-0.263771	14.4531	22.7273	0.0178458	1.01342	43.6992	27.0983	0.00414046
Inhibitory_neuroblast	OPC_1	Wnt7a	FZD8_LRP5	2.98356e-05	0.02	WNT7A_FZD8_LRP5	Wnt7a - (Fzd8+Lrp5)	WNT	Secreted Signaling	KEGG: mmu04310; PMID: 23209147	ctl	-0.217949	22.1557	28.2546	0.000849296	NA	NA	NA	NA
Vasc_2	NSC_2	Wnt7a	FZD5_LRP6	2.30766e-05	0	WNT7A_FZD5_LRP6	Wnt7a - (Fzd5+Lrp6)	WNT	Secreted Signaling	KEGG: mmu04310; PMID: 23209147	ctl	-0.356347	14.7849	21.6942	0.0114004	-0.352447	13.8223	19.7425	0.0028862
Inhibitory_neuroblast	NSC_2	Wnt7a	FZD5_LRP6	5.02675e-05	0	WNT7A_FZD5_LRP6	Wnt7a - (Fzd5+Lrp6)	WNT	Secreted Signaling	KEGG: mmu04310; PMID: 23209147	ctl	-0.217949	22.1557	28.2546	0.000849296	-0.352447	13.8223	19.7425	0.0028862
OPC_2	NSC_2	Wnt7a	FZD5_LRP6	3.22181e-05	0	WNT7A_FZD5_LRP6	Wnt7a - (Fzd5+Lrp6)	WNT	Secreted Signaling	KEGG: mmu04310; PMID: 23209147	ctl	-0.263771	14.4531	22.7273	0.0178458	-0.352447	13.8223	19.7425	0.0028862
Vasc_2	TAP_2	Wnt7a	FZD5_LRP6	8.91127e-06	0	WNT7A_FZD5_LRP6	Wnt7a - (Fzd5+Lrp6)	WNT	Secreted Signaling	KEGG: mmu04310; PMID: 23209147	ctl	-0.356347	14.7849	21.6942	0.0114004	-0.85849	26.764	39.3029	1.67719e-06
Inhibitory_neuroblast	TAP_2	Wnt7a	FZD5_LRP6	1.94117e-05	0	WNT7A_FZD5_LRP6	Wnt7a - (Fzd5+Lrp6)	WNT	Secreted Signaling	KEGG: mmu04310; PMID: 23209147	ctl	-0.217949	22.1557	28.2546	0.000849296	-0.85849	26.764	39.3029	1.67719e-06
OPC_2	TAP_2	Wnt7a	FZD5_LRP6	1.24414e-05	0	WNT7A_FZD5_LRP6	Wnt7a - (Fzd5+Lrp6)	WNT	Secreted Signaling	KEGG: mmu04310; PMID: 23209147	ctl	-0.263771	14.4531	22.7273	0.0178458	-0.85849	26.764	39.3029	1.67719e-06
Vasc_2	NSC_2	Wnt7a	FZD8_LRP6	2.18897e-05	0	WNT7A_FZD8_LRP6	Wnt7a - (Fzd8+Lrp6)	WNT	Secreted Signaling	KEGG: mmu04310; PMID: 23209147	ctl	-0.356347	14.7849	21.6942	0.0114004	1.39112	33.7094	19.0987	5.48364e-13
Inhibitory_neuroblast	NSC_2	Wnt7a	FZD8_LRP6	4.76822e-05	0	WNT7A_FZD8_LRP6	Wnt7a - (Fzd8+Lrp6)	WNT	Secreted Signaling	KEGG: mmu04310; PMID: 23209147	ctl	-0.217949	22.1557	28.2546	0.000849296	1.39112	33.7094	19.0987	5.48364e-13
OPC_2	NSC_2	Wnt7a	FZD8_LRP6	3.05611e-05	0	WNT7A_FZD8_LRP6	Wnt7a - (Fzd8+Lrp6)	WNT	Secreted Signaling	KEGG: mmu04310; PMID: 23209147	ctl	-0.263771	14.4531	22.7273	0.0178458	1.39112	33.7094	19.0987	5.48364e-13
Vasc_2	TAP_2	Wnt7a	FZD8_LRP6	2.10364e-05	0	WNT7A_FZD8_LRP6	Wnt7a - (Fzd8+Lrp6)	WNT	Secreted Signaling	KEGG: mmu04310; PMID: 23209147	ctl	-0.356347	14.7849	21.6942	0.0114004	0.0690555	26.399	27.2837	1.18474e-06
Inhibitory_neuroblast	TAP_2	Wnt7a	FZD8_LRP6	4.58235e-05	0	WNT7A_FZD8_LRP6	Wnt7a - (Fzd8+Lrp6)	WNT	Secreted Signaling	KEGG: mmu04310; PMID: 23209147	ctl	-0.217949	22.1557	28.2546	0.000849296	0.0690555	26.399	27.2837	1.18474e-06
OPC_2	TAP_2	Wnt7a	FZD8_LRP6	2.93698e-05	0	WNT7A_FZD8_LRP6	Wnt7a - (Fzd8+Lrp6)	WNT	Secreted Signaling	KEGG: mmu04310; PMID: 23209147	ctl	-0.263771	14.4531	22.7273	0.0178458	0.0690555	26.399	27.2837	1.18474e-06
Vasc_2	NSC_3	Wnt7a	FZD8_LRP6	5.81836e-05	0	WNT7A_FZD8_LRP6	Wnt7a - (Fzd8+Lrp6)	WNT	Secreted Signaling	KEGG: mmu04310; PMID: 23209147	ctl	-0.356347	14.7849	21.6942	0.0114004	0.693768	41.2837	33.6454	0.00979254
Inhibitory_neuroblast	NSC_3	Wnt7a	FZD8_LRP6	0.000126735	0	WNT7A_FZD8_LRP6	Wnt7a - (Fzd8+Lrp6)	WNT	Secreted Signaling	KEGG: mmu04310; PMID: 23209147	ctl	-0.217949	22.1557	28.2546	0.000849296	0.693768	41.2837	33.6454	0.00979254
OPC_2	NSC_3	Wnt7a	FZD8_LRP6	8.12313e-05	0	WNT7A_FZD8_LRP6	Wnt7a - (Fzd8+Lrp6)	WNT	Secreted Signaling	KEGG: mmu04310; PMID: 23209147	ctl	-0.263771	14.4531	22.7273	0.0178458	0.693768	41.2837	33.6454	0.00979254
Vasc_2	NSC_4	Wnt7a	FZD8_LRP6	2.33239e-05	0	WNT7A_FZD8_LRP6	Wnt7a - (Fzd8+Lrp6)	WNT	Secreted Signaling	KEGG: mmu04310; PMID: 23209147	ctl	-0.356347	14.7849	21.6942	0.0114004	0.315429	38.0081	29.4964	0.0080713
Inhibitory_neuroblast	NSC_4	Wnt7a	FZD8_LRP6	5.08063e-05	0	WNT7A_FZD8_LRP6	Wnt7a - (Fzd8+Lrp6)	WNT	Secreted Signaling	KEGG: mmu04310; PMID: 23209147	ctl	-0.217949	22.1557	28.2546	0.000849296	0.315429	38.0081	29.4964	0.0080713
OPC_2	NSC_4	Wnt7a	FZD8_LRP6	3.25635e-05	0	WNT7A_FZD8_LRP6	Wnt7a - (Fzd8+Lrp6)	WNT	Secreted Signaling	KEGG: mmu04310; PMID: 23209147	ctl	-0.263771	14.4531	22.7273	0.0178458	0.315429	38.0081	29.4964	0.0080713
Vasc_2	OPC_1	Wnt7a	FZD8_LRP6	2.20598e-05	0.02	WNT7A_FZD8_LRP6	Wnt7a - (Fzd8+Lrp6)	WNT	Secreted Signaling	KEGG: mmu04310; PMID: 23209147	ctl	-0.356347	14.7849	21.6942	0.0114004	NA	NA	NA	NA
Inhibitory_neuroblast	OPC_1	Wnt7a	FZD8_LRP6	4.80527e-05	0	WNT7A_FZD8_LRP6	Wnt7a - (Fzd8+Lrp6)	WNT	Secreted Signaling	KEGG: mmu04310; PMID: 23209147	ctl	-0.217949	22.1557	28.2546	0.000849296	NA	NA	NA	NA
OPC_2	OPC_1	Wnt7a	FZD8_LRP6	3.07986e-05	0.03	WNT7A_FZD8_LRP6	Wnt7a - (Fzd8+Lrp6)	WNT	Secreted Signaling	KEGG: mmu04310; PMID: 23209147	ctl	-0.263771	14.4531	22.7273	0.0178458	NA	NA	NA	NA
Vasc_2	Vasc_2	Vegfa	Flt1	9.09936e-06	0	VEGFA_VEGFR1	Vegfa - Vegfr1	VEGF	Secreted Signaling	KEGG: mmu04370; PMID: 16633338	ctl	-0.188491	8.60215	13.0165	0.0470858	NA	NA	NA	NA
OPC_1	Vasc_2	Vegfa	Flt1	0.000129034	0	VEGFA_VEGFR1	Vegfa - Vegfr1	VEGF	Secreted Signaling	KEGG: mmu04370; PMID: 16633338	ctl	-0.774922	15.7895	31.3953	0.03706	NA	NA	NA	NA
Vasc_2	Vasc_1	Vegfa	Flt1	3.57918e-06	0	VEGFA_VEGFR1	Vegfa - Vegfr1	VEGF	Secreted Signaling	KEGG: mmu04370; PMID: 16633338	ctl	-0.188491	8.60215	13.0165	0.0470858	NA	NA	NA	NA
OPC_1	Vasc_1	Vegfa	Flt1	5.07583e-05	0	VEGFA_VEGFR1	Vegfa - Vegfr1	VEGF	Secreted Signaling	KEGG: mmu04370; PMID: 16633338	ctl	-0.774922	15.7895	31.3953	0.03706	NA	NA	NA	NA
Interneuron_1	Microglia_1	Cx3cl1	Cx3cr1	4.74871e-05	0	CX3CL1_CX3CR1	Cx3cl1 - Cx3cr1	CX3C	Secreted Signaling	KEGG: mmu04060	ctl	-0.899934	12.9278	24.0942	7.07801e-05	NA	NA	NA	NA
Interneuron_1	Microglia_2	Cx3cl1	Cx3cr1	0.000707999	0	CX3CL1_CX3CR1	Cx3cl1 - Cx3cr1	CX3C	Secreted Signaling	KEGG: mmu04060	ctl	-0.899934	12.9278	24.0942	7.07801e-05	-5.50387	60	84.507	0.0278917

## Sheet: P0_SVZ_Upregulated_in_DS
source	target	ligand	receptor	prob	pval	interaction_name	interaction_name_2	pathway_name	annotation	evidence	datasets	ligand.logFC	ligand.pct.1	ligand.pct.2	ligand.pvalues	receptor.logFC	receptor.pct.1	receptor.pct.2	receptor.pvalues
NSC_1	Vasc_1	Vegfa	Flt1	4.88055e-05	0	VEGFA_VEGFR1	Vegfa - Vegfr1	VEGF	Secreted Signaling	KEGG: mmu04370; PMID: 16633338	ds	0.645275	17.5844	12.8297	0.00051767	NA	NA	NA	NA
NSC_2	Vasc_1	Vegfa	Flt1	0.000162756	0	VEGFA_VEGFR1	Vegfa - Vegfr1	VEGF	Secreted Signaling	KEGG: mmu04370; PMID: 16633338	ds	1.24169	37.9408	31.867	0.000192379	NA	NA	NA	NA
NSC_1	Vasc_2	Vegfa	Flt1	8.14259e-05	0	VEGFA_VEGFR1	Vegfa - Vegfr1	VEGF	Secreted Signaling	KEGG: mmu04370; PMID: 16633338	ds	0.645275	17.5844	12.8297	0.00051767	NA	NA	NA	NA
NSC_2	Vasc_2	Vegfa	Flt1	0.000271518	0	VEGFA_VEGFR1	Vegfa - Vegfr1	VEGF	Secreted Signaling	KEGG: mmu04370; PMID: 16633338	ds	1.24169	37.9408	31.867	0.000192379	NA	NA	NA	NA
Ependymal	Microglia_1	Cx3cl1	Cx3cr1	8.24862e-07	0	CX3CL1_CX3CR1	Cx3cl1 - Cx3cr1	CX3C	Secreted Signaling	KEGG: mmu04060	ds	0.38878	11.7754	7.93814	0.00851685	NA	NA	NA	NA
NSC_2	Microglia_1	Cx3cl1	Cx3cr1	8.68053e-08	0	CX3CL1_CX3CR1	Cx3cl1 - Cx3cr1	CX3C	Secreted Signaling	KEGG: mmu04060	ds	0.130781	10.1551	6.97425	0.0242203	NA	NA	NA	NA
TAP_2	InN_3	Mdk	Lrp1	0.00225562	0	MDK_LRP1	Mdk - Lrp1	MK	Secreted Signaling	PMID: 28356350	ds	1.1726	70.5596	62.6202	0.000198502	1.59912	67.5732	64.9718	0.000964696
TAP_1	InN_3	Mdk	Lrp1	0.00102155	0	MDK_LRP1	Mdk - Lrp1	MK	Secreted Signaling	PMID: 28356350	ds	0.698852	30.6189	26.6598	0.0491226	1.59912	67.5732	64.9718	0.000964696
OPC_2	OPC_2	Mdk	Lrp1	0.00101873	0.02	MDK_LRP1	Mdk - Lrp1	MK	Secreted Signaling	PMID: 28356350	ds	1.1141	33.2031	23.6364	0.00860766	2.84889	63.2812	51.8182	0.000302349
NSC_3	OPC_2	Mdk	Lrp1	0.00086797	0.02	MDK_LRP1	Mdk - Lrp1	MK	Secreted Signaling	PMID: 28356350	ds	0.474117	43.4231	38.1057	0.0208775	2.84889	63.2812	51.8182	0.000302349
TAP_2	OPC_2	Mdk	Lrp1	0.00254797	0	MDK_LRP1	Mdk - Lrp1	MK	Secreted Signaling	PMID: 28356350	ds	1.1726	70.5596	62.6202	0.000198502	2.84889	63.2812	51.8182	0.000302349
TAP_1	OPC_2	Mdk	Lrp1	0.00115414	0	MDK_LRP1	Mdk - Lrp1	MK	Secreted Signaling	PMID: 28356350	ds	0.698852	30.6189	26.6598	0.0491226	2.84889	63.2812	51.8182	0.000302349
OPC_2	Excitatory_neuroblast	Mdk	Lrp1	0.00092483	0.03	MDK_LRP1	Mdk - Lrp1	MK	Secreted Signaling	PMID: 28356350	ds	1.1141	33.2031	23.6364	0.00860766	2.12294	64.7343	57.3487	5.56155e-08
TAP_2	Excitatory_neuroblast	Mdk	Lrp1	0.00231343	0	MDK_LRP1	Mdk - Lrp1	MK	Secreted Signaling	PMID: 28356350	ds	1.1726	70.5596	62.6202	0.000198502	2.12294	64.7343	57.3487	5.56155e-08
TAP_1	Excitatory_neuroblast	Mdk	Lrp1	0.00104776	0	MDK_LRP1	Mdk - Lrp1	MK	Secreted Signaling	PMID: 28356350	ds	0.698852	30.6189	26.6598	0.0491226	2.12294	64.7343	57.3487	5.56155e-08
OPC_2	NSC_3	Mdk	Lrp1	0.0015121	0	MDK_LRP1	Mdk - Lrp1	MK	Secreted Signaling	PMID: 28356350	ds	1.1141	33.2031	23.6364	0.00860766	2.39331	86.0539	83.2599	1.24386e-06
NSC_3	NSC_3	Mdk	Lrp1	0.00128842	0	MDK_LRP1	Mdk - Lrp1	MK	Secreted Signaling	PMID: 28356350	ds	0.474117	43.4231	38.1057	0.0208775	2.39331	86.0539	83.2599	1.24386e-06
TAP_2	NSC_3	Mdk	Lrp1	0.00377913	0	MDK_LRP1	Mdk - Lrp1	MK	Secreted Signaling	PMID: 28356350	ds	1.1726	70.5596	62.6202	0.000198502	2.39331	86.0539	83.2599	1.24386e-06
TAP_1	NSC_3	Mdk	Lrp1	0.00171296	0	MDK_LRP1	Mdk - Lrp1	MK	Secreted Signaling	PMID: 28356350	ds	0.698852	30.6189	26.6598	0.0491226	2.39331	86.0539	83.2599	1.24386e-06
TAP_2	Inhibitory_neuroblast	Mdk	Lrp1	0.00175206	0	MDK_LRP1	Mdk - Lrp1	MK	Secreted Signaling	PMID: 28356350	ds	1.1726	70.5596	62.6202	0.000198502	2.04935	55.015	46.9624	8.07444e-12
TAP_2	TAP_2	Mdk	Lrp1	0.00182795	0	MDK_LRP1	Mdk - Lrp1	MK	Secreted Signaling	PMID: 28356350	ds	1.1726	70.5596	62.6202	0.000198502	1.81828	71.5328	62.6202	3.16199e-08
OPC_2	OPC_1	Mdk	Lrp1	0.00159864	0	MDK_LRP1	Mdk - Lrp1	MK	Secreted Signaling	PMID: 28356350	ds	1.1141	33.2031	23.6364	0.00860766	NA	NA	NA	NA
NSC_3	OPC_1	Mdk	Lrp1	0.00136217	0	MDK_LRP1	Mdk - Lrp1	MK	Secreted Signaling	PMID: 28356350	ds	0.474117	43.4231	38.1057	0.0208775	NA	NA	NA	NA
TAP_2	OPC_1	Mdk	Lrp1	0.0039949	0	MDK_LRP1	Mdk - Lrp1	MK	Secreted Signaling	PMID: 28356350	ds	1.1726	70.5596	62.6202	0.000198502	NA	NA	NA	NA
TAP_1	OPC_1	Mdk	Lrp1	0.00181098	0	MDK_LRP1	Mdk - Lrp1	MK	Secreted Signaling	PMID: 28356350	ds	0.698852	30.6189	26.6598	0.0491226	NA	NA	NA	NA
OPC_2	Vasc_1	Mdk	Lrp1	0.00130154	0.01	MDK_LRP1	Mdk - Lrp1	MK	Secreted Signaling	PMID: 28356350	ds	1.1141	33.2031	23.6364	0.00860766	NA	NA	NA	NA
NSC_3	Vasc_1	Mdk	Lrp1	0.00110897	0.03	MDK_LRP1	Mdk - Lrp1	MK	Secreted Signaling	PMID: 28356350	ds	0.474117	43.4231	38.1057	0.0208775	NA	NA	NA	NA
TAP_2	Vasc_1	Mdk	Lrp1	0.00325393	0	MDK_LRP1	Mdk - Lrp1	MK	Secreted Signaling	PMID: 28356350	ds	1.1726	70.5596	62.6202	0.000198502	NA	NA	NA	NA
TAP_1	Vasc_1	Mdk	Lrp1	0.00147448	0	MDK_LRP1	Mdk - Lrp1	MK	Secreted Signaling	PMID: 28356350	ds	0.698852	30.6189	26.6598	0.0491226	NA	NA	NA	NA
TAP_2	Vasc_2	Mdk	Lrp1	0.00176865	0	MDK_LRP1	Mdk - Lrp1	MK	Secreted Signaling	PMID: 28356350	ds	1.1726	70.5596	62.6202	0.000198502	2.27906	55.6452	49.3802	0.00112811
TAP_2	TAP_1	Mdk	Lrp1	0.0010114	0	MDK_LRP1	Mdk - Lrp1	MK	Secreted Signaling	PMID: 28356350	ds	1.1726	70.5596	62.6202	0.000198502	2.36375	33.7134	19.6058	1.93563e-11
OPC_2	NSC_1	Mdk	Lrp1	0.00114698	0.01	MDK_LRP1	Mdk - Lrp1	MK	Secreted Signaling	PMID: 28356350	ds	1.1141	33.2031	23.6364	0.00860766	2.65092	60.1243	49.5803	2.25013e-09
NSC_3	NSC_1	Mdk	Lrp1	0.000977253	0	MDK_LRP1	Mdk - Lrp1	MK	Secreted Signaling	PMID: 28356350	ds	0.474117	43.4231	38.1057	0.0208775	2.65092	60.1243	49.5803	2.25013e-09
TAP_2	NSC_1	Mdk	Lrp1	0.00286816	0	MDK_LRP1	Mdk - Lrp1	MK	Secreted Signaling	PMID: 28356350	ds	1.1726	70.5596	62.6202	0.000198502	2.65092	60.1243	49.5803	2.25013e-09
TAP_1	NSC_1	Mdk	Lrp1	0.0012994	0	MDK_LRP1	Mdk - Lrp1	MK	Secreted Signaling	PMID: 28356350	ds	0.698852	30.6189	26.6598	0.0491226	2.65092	60.1243	49.5803	2.25013e-09
TAP_2	Ependymal	Mdk	Lrp1	0.00170033	0	MDK_LRP1	Mdk - Lrp1	MK	Secreted Signaling	PMID: 28356350	ds	1.1726	70.5596	62.6202	0.000198502	3.66859	47.6449	33.1959	1.08585e-14
OPC_2	InN_1	Mdk	Lrp1	0.00125109	0.01	MDK_LRP1	Mdk - Lrp1	MK	Secreted Signaling	PMID: 28356350	ds	1.1141	33.2031	23.6364	0.00860766	2.38215	79.0875	78.0797	4.39078e-06
NSC_3	InN_1	Mdk	Lrp1	0.00106597	0	MDK_LRP1	Mdk - Lrp1	MK	Secreted Signaling	PMID: 28356350	ds	0.474117	43.4231	38.1057	0.0208775	2.38215	79.0875	78.0797	4.39078e-06
TAP_2	InN_1	Mdk	Lrp1	0.00312801	0	MDK_LRP1	Mdk - Lrp1	MK	Secreted Signaling	PMID: 28356350	ds	1.1726	70.5596	62.6202	0.000198502	2.38215	79.0875	78.0797	4.39078e-06
TAP_1	InN_1	Mdk	Lrp1	0.00141733	0	MDK_LRP1	Mdk - Lrp1	MK	Secreted Signaling	PMID: 28356350	ds	0.698852	30.6189	26.6598	0.0491226	2.38215	79.0875	78.0797	4.39078e-06
InN_3	NSC_2	Mdk	Lrp1	0.000938825	0.01	MDK_LRP1	Mdk - Lrp1	MK	Secreted Signaling	PMID: 28356350	ds	0.740745	26.9874	21.6949	0.00909109	6.65321	87.8702	78.0043	1.2375e-30
OPC_2	NSC_2	Mdk	Lrp1	0.00221851	0	MDK_LRP1	Mdk - Lrp1	MK	Secreted Signaling	PMID: 28356350	ds	1.1141	33.2031	23.6364	0.00860766	6.65321	87.8702	78.0043	1.2375e-30
NSC_3	NSC_2	Mdk	Lrp1	0.00189052	0	MDK_LRP1	Mdk - Lrp1	MK	Secreted Signaling	PMID: 28356350	ds	0.474117	43.4231	38.1057	0.0208775	6.65321	87.8702	78.0043	1.2375e-30
TAP_2	NSC_2	Mdk	Lrp1	0.00553875	0	MDK_LRP1	Mdk - Lrp1	MK	Secreted Signaling	PMID: 28356350	ds	1.1726	70.5596	62.6202	0.000198502	6.65321	87.8702	78.0043	1.2375e-30
TAP_1	NSC_2	Mdk	Lrp1	0.00251297	0	MDK_LRP1	Mdk - Lrp1	MK	Secreted Signaling	PMID: 28356350	ds	0.698852	30.6189	26.6598	0.0491226	6.65321	87.8702	78.0043	1.2375e-30
OPC_2	NSC_4	Mdk	Lrp1	0.00158871	0	MDK_LRP1	Mdk - Lrp1	MK	Secreted Signaling	PMID: 28356350	ds	1.1141	33.2031	23.6364	0.00860766	4.52665	88.2114	81.295	1.07489e-11
NSC_3	NSC_4	Mdk	Lrp1	0.00135371	0	MDK_LRP1	Mdk - Lrp1	MK	Secreted Signaling	PMID: 28356350	ds	0.474117	43.4231	38.1057	0.0208775	4.52665	88.2114	81.295	1.07489e-11
TAP_2	NSC_4	Mdk	Lrp1	0.00397015	0	MDK_LRP1	Mdk - Lrp1	MK	Secreted Signaling	PMID: 28356350	ds	1.1726	70.5596	62.6202	0.000198502	4.52665	88.2114	81.295	1.07489e-11
TAP_1	NSC_4	Mdk	Lrp1	0.00179974	0	MDK_LRP1	Mdk - Lrp1	MK	Secreted Signaling	PMID: 28356350	ds	0.698852	30.6189	26.6598	0.0491226	4.52665	88.2114	81.295	1.07489e-11
OPC_2	Microglia_1	Mdk	Lrp1	0.00123845	0	MDK_LRP1	Mdk - Lrp1	MK	Secreted Signaling	PMID: 28356350	ds	1.1141	33.2031	23.6364	0.00860766	NA	NA	NA	NA
NSC_3	Microglia_1	Mdk	Lrp1	0.00105521	0	MDK_LRP1	Mdk - Lrp1	MK	Secreted Signaling	PMID: 28356350	ds	0.474117	43.4231	38.1057	0.0208775	NA	NA	NA	NA
TAP_2	Microglia_1	Mdk	Lrp1	0.00309649	0	MDK_LRP1	Mdk - Lrp1	MK	Secreted Signaling	PMID: 28356350	ds	1.1726	70.5596	62.6202	0.000198502	NA	NA	NA	NA
TAP_1	Microglia_1	Mdk	Lrp1	0.00140302	0	MDK_LRP1	Mdk - Lrp1	MK	Secreted Signaling	PMID: 28356350	ds	0.698852	30.6189	26.6598	0.0491226	NA	NA	NA	NA
NSC_3	Microglia_2	Mdk	Lrp1	0.00248252	0	MDK_LRP1	Mdk - Lrp1	MK	Secreted Signaling	PMID: 28356350	ds	0.474117	43.4231	38.1057	0.0208775	NA	NA	NA	NA
TAP_1	Microglia_2	Mdk	Lrp1	0.00329924	0	MDK_LRP1	Mdk - Lrp1	MK	Secreted Signaling	PMID: 28356350	ds	0.698852	30.6189	26.6598	0.0491226	NA	NA	NA	NA

## Sheet: P0_Cortex_Upregulated_in_DS
source	target	ligand	receptor	prob	pval	interaction_name	interaction_name_2	pathway_name	annotation	evidence	datasets	ligand.logFC	ligand.pct.1	ligand.pct.2	ligand.pvalues	receptor.logFC	receptor.pct.1	receptor.pct.2	receptor.pvalues
InN_3	Vasc_2	Wnt7a	FZD4_LRP5	2.58365e-05	0	WNT7A_FZD4_LRP5	Wnt7a - (Fzd4+Lrp5)	WNT	Secreted Signaling	KEGG: mmu04310; PMID: 23209147	ds	0.0640203	28.4392	26.7644	0.024216	0.55624	34.361	28.3431	1.02759e-05
InN_3	Vasc_1	Wnt7a	FZD4_LRP5	1.07125e-05	0	WNT7A_FZD4_LRP5	Wnt7a - (Fzd4+Lrp5)	WNT	Secreted Signaling	KEGG: mmu04310; PMID: 23209147	ds	0.0640203	28.4392	26.7644	0.024216	0.808255	65.4545	55.6667	0.016784
InN_3	Microglia_1	Wnt7a	FZD7_LRP5	1.02763e-05	0	WNT7A_FZD7_LRP5	Wnt7a - (Fzd7+Lrp5)	WNT	Secreted Signaling	KEGG: mmu04310; PMID: 23209147	ds	0.0640203	28.4392	26.7644	0.024216	NA	NA	NA	NA
InN_3	Microglia_2	Wnt7a	FZD7_LRP5	1.89177e-05	0	WNT7A_FZD7_LRP5	Wnt7a - (Fzd7+Lrp5)	WNT	Secreted Signaling	KEGG: mmu04310; PMID: 23209147	ds	0.0640203	28.4392	26.7644	0.024216	NA	NA	NA	NA
InN_3	Fibroblast	Wnt7a	FZD7_LRP5	4.79814e-05	0	WNT7A_FZD7_LRP5	Wnt7a - (Fzd7+Lrp5)	WNT	Secreted Signaling	KEGG: mmu04310; PMID: 23209147	ds	0.0640203	28.4392	26.7644	0.024216	1.31016	44.0789	24.0107	1.03386e-30
InN_3	Astrocyte_2	Wnt7a	FZD7_LRP5	1.06597e-05	0	WNT7A_FZD7_LRP5	Wnt7a - (Fzd7+Lrp5)	WNT	Secreted Signaling	KEGG: mmu04310; PMID: 23209147	ds	0.0640203	28.4392	26.7644	0.024216	NA	NA	NA	NA
InN_3	Layer_6b_ExN	Wnt7a	FZD8_LRP5	4.80042e-07	0	WNT7A_FZD8_LRP5	Wnt7a - (Fzd8+Lrp5)	WNT	Secreted Signaling	KEGG: mmu04310; PMID: 23209147	ds	0.0640203	28.4392	26.7644	0.024216	0.150363	10.9848	5.50725	3.86922e-07
InN_3	Layer_2-4_ExN	Wnt7a	FZD8_LRP5	3.8355e-06	0	WNT7A_FZD8_LRP5	Wnt7a - (Fzd8+Lrp5)	WNT	Secreted Signaling	KEGG: mmu04310; PMID: 23209147	ds	0.0640203	28.4392	26.7644	0.024216	0.217848	16.7709	8.81864	1.84757e-31
InN_3	Layer_2-3_ExN	Wnt7a	FZD8_LRP5	8.60765e-06	0	WNT7A_FZD8_LRP5	Wnt7a - (Fzd8+Lrp5)	WNT	Secreted Signaling	KEGG: mmu04310; PMID: 23209147	ds	0.0640203	28.4392	26.7644	0.024216	0.258036	24.7764	13.3862	1.10979e-54
InN_3	Layer_2-5_ExN	Wnt7a	FZD8_LRP5	4.43126e-06	0	WNT7A_FZD8_LRP5	Wnt7a - (Fzd8+Lrp5)	WNT	Secreted Signaling	KEGG: mmu04310; PMID: 23209147	ds	0.0640203	28.4392	26.7644	0.024216	0.109842	19.6684	12.83	3.78232e-08
InN_3	Astrocyte_1	Wnt7a	FZD8_LRP5	5.04975e-06	0	WNT7A_FZD8_LRP5	Wnt7a - (Fzd8+Lrp5)	WNT	Secreted Signaling	KEGG: mmu04310; PMID: 23209147	ds	0.0640203	28.4392	26.7644	0.024216	0.240069	21.792	17.0583	0.000557209
InN_3	Astrocyte_2	Wnt7a	FZD8_LRP5	1.4756e-05	0	WNT7A_FZD8_LRP5	Wnt7a - (Fzd8+Lrp5)	WNT	Secreted Signaling	KEGG: mmu04310; PMID: 23209147	ds	0.0640203	28.4392	26.7644	0.024216	NA	NA	NA	NA
InN_3	Vasc_2	Wnt7b	FZD4_LRP5	1.19083e-07	0	WNT7B_FZD4_LRP5	Wnt7b - (Fzd4+Lrp5)	WNT	Secreted Signaling	KEGG: mmu04310; PMID: 23209147	ds	0.0873155	10.1852	8.29912	2.66282e-05	0.55624	34.361	28.3431	1.02759e-05
Layer_6b_ExN	Vasc_2	Wnt7b	FZD4_LRP5	1.96952e-05	0	WNT7B_FZD4_LRP5	Wnt7b - (Fzd4+Lrp5)	WNT	Secreted Signaling	KEGG: mmu04310; PMID: 23209147	ds	0.567965	24.0741	11.6522	2.0161e-18	0.55624	34.361	28.3431	1.02759e-05
Subplate	Vasc_2	Wnt7b	FZD4_LRP5	1.36725e-06	0	WNT7B_FZD4_LRP5	Wnt7b - (Fzd4+Lrp5)	WNT	Secreted Signaling	KEGG: mmu04310; PMID: 23209147	ds	0.10747	11.8988	10.2215	0.0401754	0.55624	34.361	28.3431	1.02759e-05
Layer_5-6a_ExN	Vasc_2	Wnt7b	FZD4_LRP5	0.000112119	0	WNT7B_FZD4_LRP5	Wnt7b - (Fzd4+Lrp5)	WNT	Secreted Signaling	KEGG: mmu04310; PMID: 23209147	ds	0.939297	58.2266	45.3807	2.93605e-58	0.55624	34.361	28.3431	1.02759e-05
Layer_2-3_ExN	Vasc_2	Wnt7b	FZD4_LRP5	4.00282e-05	0	WNT7B_FZD4_LRP5	Wnt7b - (Fzd4+Lrp5)	WNT	Secreted Signaling	KEGG: mmu04310; PMID: 23209147	ds	0.224041	40.5088	30.5187	2.49279e-23	0.55624	34.361	28.3431	1.02759e-05
Layer_2-5_ExN	Vasc_2	Wnt7b	FZD4_LRP5	2.07279e-05	0	WNT7B_FZD4_LRP5	Wnt7b - (Fzd4+Lrp5)	WNT	Secreted Signaling	KEGG: mmu04310; PMID: 23209147	ds	0.246409	30.5592	22.6031	6.00783e-08	0.55624	34.361	28.3431	1.02759e-05
OPC_1	Vasc_2	Wnt7b	FZD4_LRP5	8.87752e-06	0	WNT7B_FZD4_LRP5	Wnt7b - (Fzd4+Lrp5)	WNT	Secreted Signaling	KEGG: mmu04310; PMID: 23209147	ds	0.151956	18.8552	15.0971	0.0119837	0.55624	34.361	28.3431	1.02759e-05
InN_3	Vasc_1	Wnt7b	FZD4_LRP5	4.93743e-08	0	WNT7B_FZD4_LRP5	Wnt7b - (Fzd4+Lrp5)	WNT	Secreted Signaling	KEGG: mmu04310; PMID: 23209147	ds	0.0873155	10.1852	8.29912	2.66282e-05	0.808255	65.4545	55.6667	0.016784
Layer_6b_ExN	Vasc_1	Wnt7b	FZD4_LRP5	8.16612e-06	0	WNT7B_FZD4_LRP5	Wnt7b - (Fzd4+Lrp5)	WNT	Secreted Signaling	KEGG: mmu04310; PMID: 23209147	ds	0.567965	24.0741	11.6522	2.0161e-18	0.808255	65.4545	55.6667	0.016784
Subplate	Vasc_1	Wnt7b	FZD4_LRP5	5.66889e-07	0	WNT7B_FZD4_LRP5	Wnt7b - (Fzd4+Lrp5)	WNT	Secreted Signaling	KEGG: mmu04310; PMID: 23209147	ds	0.10747	11.8988	10.2215	0.0401754	0.808255	65.4545	55.6667	0.016784
Layer_5-6a_ExN	Vasc_1	Wnt7b	FZD4_LRP5	4.649e-05	0	WNT7B_FZD4_LRP5	Wnt7b - (Fzd4+Lrp5)	WNT	Secreted Signaling	KEGG: mmu04310; PMID: 23209147	ds	0.939297	58.2266	45.3807	2.93605e-58	0.808255	65.4545	55.6667	0.016784
Layer_2-3_ExN	Vasc_1	Wnt7b	FZD4_LRP5	1.65969e-05	0	WNT7B_FZD4_LRP5	Wnt7b - (Fzd4+Lrp5)	WNT	Secreted Signaling	KEGG: mmu04310; PMID: 23209147	ds	0.224041	40.5088	30.5187	2.49279e-23	0.808255	65.4545	55.6667	0.016784
Layer_2-5_ExN	Vasc_1	Wnt7b	FZD4_LRP5	8.59429e-06	0	WNT7B_FZD4_LRP5	Wnt7b - (Fzd4+Lrp5)	WNT	Secreted Signaling	KEGG: mmu04310; PMID: 23209147	ds	0.246409	30.5592	22.6031	6.00783e-08	0.808255	65.4545	55.6667	0.016784
OPC_1	Vasc_1	Wnt7b	FZD4_LRP5	3.68081e-06	0	WNT7B_FZD4_LRP5	Wnt7b - (Fzd4+Lrp5)	WNT	Secreted Signaling	KEGG: mmu04310; PMID: 23209147	ds	0.151956	18.8552	15.0971	0.0119837	0.808255	65.4545	55.6667	0.016784
InN_3	Microglia_2	Wnt7b	FZD7_LRP5	8.71936e-08	0.04	WNT7B_FZD7_LRP5	Wnt7b - (Fzd7+Lrp5)	WNT	Secreted Signaling	KEGG: mmu04310; PMID: 23209147	ds	0.0873155	10.1852	8.29912	2.66282e-05	NA	NA	NA	NA
Layer_6b_ExN	Microglia_2	Wnt7b	FZD7_LRP5	1.4421e-05	0	WNT7B_FZD7_LRP5	Wnt7b - (Fzd7+Lrp5)	WNT	Secreted Signaling	KEGG: mmu04310; PMID: 23209147	ds	0.567965	24.0741	11.6522	2.0161e-18	NA	NA	NA	NA
Subplate	Microglia_2	Wnt7b	FZD7_LRP5	1.00111e-06	0.04	WNT7B_FZD7_LRP5	Wnt7b - (Fzd7+Lrp5)	WNT	Secreted Signaling	KEGG: mmu04310; PMID: 23209147	ds	0.10747	11.8988	10.2215	0.0401754	NA	NA	NA	NA
Layer_5-6a_ExN	Microglia_2	Wnt7b	FZD7_LRP5	8.2097e-05	0	WNT7B_FZD7_LRP5	Wnt7b - (Fzd7+Lrp5)	WNT	Secreted Signaling	KEGG: mmu04310; PMID: 23209147	ds	0.939297	58.2266	45.3807	2.93605e-58	NA	NA	NA	NA
Layer_2-3_ExN	Microglia_2	Wnt7b	FZD7_LRP5	2.93092e-05	0	WNT7B_FZD7_LRP5	Wnt7b - (Fzd7+Lrp5)	WNT	Secreted Signaling	KEGG: mmu04310; PMID: 23209147	ds	0.224041	40.5088	30.5187	2.49279e-23	NA	NA	NA	NA
Layer_2-5_ExN	Microglia_2	Wnt7b	FZD7_LRP5	1.51772e-05	0	WNT7B_FZD7_LRP5	Wnt7b - (Fzd7+Lrp5)	WNT	Secreted Signaling	KEGG: mmu04310; PMID: 23209147	ds	0.246409	30.5592	22.6031	6.00783e-08	NA	NA	NA	NA
OPC_1	Microglia_2	Wnt7b	FZD7_LRP5	6.50019e-06	0	WNT7B_FZD7_LRP5	Wnt7b - (Fzd7+Lrp5)	WNT	Secreted Signaling	KEGG: mmu04310; PMID: 23209147	ds	0.151956	18.8552	15.0971	0.0119837	NA	NA	NA	NA
InN_3	Fibroblast	Wnt7b	FZD7_LRP5	2.21157e-07	0	WNT7B_FZD7_LRP5	Wnt7b - (Fzd7+Lrp5)	WNT	Secreted Signaling	KEGG: mmu04310; PMID: 23209147	ds	0.0873155	10.1852	8.29912	2.66282e-05	1.31016	44.0789	24.0107	1.03386e-30
Layer_6b_ExN	Fibroblast	Wnt7b	FZD7_LRP5	3.65766e-05	0	WNT7B_FZD7_LRP5	Wnt7b - (Fzd7+Lrp5)	WNT	Secreted Signaling	KEGG: mmu04310; PMID: 23209147	ds	0.567965	24.0741	11.6522	2.0161e-18	1.31016	44.0789	24.0107	1.03386e-30
Subplate	Fibroblast	Wnt7b	FZD7_LRP5	2.5392e-06	0	WNT7B_FZD7_LRP5	Wnt7b - (Fzd7+Lrp5)	WNT	Secreted Signaling	KEGG: mmu04310; PMID: 23209147	ds	0.10747	11.8988	10.2215	0.0401754	1.31016	44.0789	24.0107	1.03386e-30
Layer_5-6a_ExN	Fibroblast	Wnt7b	FZD7_LRP5	0.000208204	0	WNT7B_FZD7_LRP5	Wnt7b - (Fzd7+Lrp5)	WNT	Secreted Signaling	KEGG: mmu04310; PMID: 23209147	ds	0.939297	58.2266	45.3807	2.93605e-58	1.31016	44.0789	24.0107	1.03386e-30
Layer_2-3_ExN	Fibroblast	Wnt7b	FZD7_LRP5	7.43362e-05	0	WNT7B_FZD7_LRP5	Wnt7b - (Fzd7+Lrp5)	WNT	Secreted Signaling	KEGG: mmu04310; PMID: 23209147	ds	0.224041	40.5088	30.5187	2.49279e-23	1.31016	44.0789	24.0107	1.03386e-30
Layer_2-5_ExN	Fibroblast	Wnt7b	FZD7_LRP5	3.84943e-05	0	WNT7B_FZD7_LRP5	Wnt7b - (Fzd7+Lrp5)	WNT	Secreted Signaling	KEGG: mmu04310; PMID: 23209147	ds	0.246409	30.5592	22.6031	6.00783e-08	1.31016	44.0789	24.0107	1.03386e-30
OPC_1	Fibroblast	Wnt7b	FZD7_LRP5	1.64869e-05	0	WNT7B_FZD7_LRP5	Wnt7b - (Fzd7+Lrp5)	WNT	Secreted Signaling	KEGG: mmu04310; PMID: 23209147	ds	0.151956	18.8552	15.0971	0.0119837	1.31016	44.0789	24.0107	1.03386e-30
InN_3	Astrocyte_2	Wnt7b	FZD7_LRP5	4.91312e-08	0	WNT7B_FZD7_LRP5	Wnt7b - (Fzd7+Lrp5)	WNT	Secreted Signaling	KEGG: mmu04310; PMID: 23209147	ds	0.0873155	10.1852	8.29912	2.66282e-05	NA	NA	NA	NA
Layer_6b_ExN	Astrocyte_2	Wnt7b	FZD7_LRP5	8.12591e-06	0	WNT7B_FZD7_LRP5	Wnt7b - (Fzd7+Lrp5)	WNT	Secreted Signaling	KEGG: mmu04310; PMID: 23209147	ds	0.567965	24.0741	11.6522	2.0161e-18	NA	NA	NA	NA
Subplate	Astrocyte_2	Wnt7b	FZD7_LRP5	5.64097e-07	0	WNT7B_FZD7_LRP5	Wnt7b - (Fzd7+Lrp5)	WNT	Secreted Signaling	KEGG: mmu04310; PMID: 23209147	ds	0.10747	11.8988	10.2215	0.0401754	NA	NA	NA	NA
Layer_5-6a_ExN	Astrocyte_2	Wnt7b	FZD7_LRP5	4.62611e-05	0	WNT7B_FZD7_LRP5	Wnt7b - (Fzd7+Lrp5)	WNT	Secreted Signaling	KEGG: mmu04310; PMID: 23209147	ds	0.939297	58.2266	45.3807	2.93605e-58	NA	NA	NA	NA
Layer_2-3_ExN	Astrocyte_2	Wnt7b	FZD7_LRP5	1.65151e-05	0	WNT7B_FZD7_LRP5	Wnt7b - (Fzd7+Lrp5)	WNT	Secreted Signaling	KEGG: mmu04310; PMID: 23209147	ds	0.224041	40.5088	30.5187	2.49279e-23	NA	NA	NA	NA
Layer_2-5_ExN	Astrocyte_2	Wnt7b	FZD7_LRP5	8.55197e-06	0	WNT7B_FZD7_LRP5	Wnt7b - (Fzd7+Lrp5)	WNT	Secreted Signaling	KEGG: mmu04310; PMID: 23209147	ds	0.246409	30.5592	22.6031	6.00783e-08	NA	NA	NA	NA
OPC_1	Astrocyte_2	Wnt7b	FZD7_LRP5	3.66269e-06	0	WNT7B_FZD7_LRP5	Wnt7b - (Fzd7+Lrp5)	WNT	Secreted Signaling	KEGG: mmu04310; PMID: 23209147	ds	0.151956	18.8552	15.0971	0.0119837	NA	NA	NA	NA
Layer_5-6a_ExN	Layer_6b_ExN	Wnt7b	FZD8_LRP5	2.08336e-06	0	WNT7B_FZD8_LRP5	Wnt7b - (Fzd8+Lrp5)	WNT	Secreted Signaling	KEGG: mmu04310; PMID: 23209147	ds	0.939297	58.2266	45.3807	2.93605e-58	0.150363	10.9848	5.50725	3.86922e-07
Layer_6b_ExN	Layer_2-4_ExN	Wnt7b	FZD8_LRP5	2.9238e-06	0	WNT7B_FZD8_LRP5	Wnt7b - (Fzd8+Lrp5)	WNT	Secreted Signaling	KEGG: mmu04310; PMID: 23209147	ds	0.567965	24.0741	11.6522	2.0161e-18	0.217848	16.7709	8.81864	1.84757e-31
Layer_5-6a_ExN	Layer_2-4_ExN	Wnt7b	FZD8_LRP5	1.66457e-05	0	WNT7B_FZD8_LRP5	Wnt7b - (Fzd8+Lrp5)	WNT	Secreted Signaling	KEGG: mmu04310; PMID: 23209147	ds	0.939297	58.2266	45.3807	2.93605e-58	0.217848	16.7709	8.81864	1.84757e-31
Layer_2-3_ExN	Layer_2-4_ExN	Wnt7b	FZD8_LRP5	5.94237e-06	0	WNT7B_FZD8_LRP5	Wnt7b - (Fzd8+Lrp5)	WNT	Secreted Signaling	KEGG: mmu04310; PMID: 23209147	ds	0.224041	40.5088	30.5187	2.49279e-23	0.217848	16.7709	8.81864	1.84757e-31
Layer_2-5_ExN	Layer_2-4_ExN	Wnt7b	FZD8_LRP5	3.0771e-06	0	WNT7B_FZD8_LRP5	Wnt7b - (Fzd8+Lrp5)	WNT	Secreted Signaling	KEGG: mmu04310; PMID: 23209147	ds	0.246409	30.5592	22.6031	6.00783e-08	0.217848	16.7709	8.81864	1.84757e-31
OPC_1	Layer_2-4_ExN	Wnt7b	FZD8_LRP5	1.31787e-06	0	WNT7B_FZD8_LRP5	Wnt7b - (Fzd8+Lrp5)	WNT	Secreted Signaling	KEGG: mmu04310; PMID: 23209147	ds	0.151956	18.8552	15.0971	0.0119837	0.217848	16.7709	8.81864	1.84757e-31
Layer_6b_ExN	Layer_2-3_ExN	Wnt7b	FZD8_LRP5	6.56161e-06	0	WNT7B_FZD8_LRP5	Wnt7b - (Fzd8+Lrp5)	WNT	Secreted Signaling	KEGG: mmu04310; PMID: 23209147	ds	0.567965	24.0741	11.6522	2.0161e-18	0.258036	24.7764	13.3862	1.10979e-54
Layer_5-6a_ExN	Layer_2-3_ExN	Wnt7b	FZD8_LRP5	3.73558e-05	0	WNT7B_FZD8_LRP5	Wnt7b - (Fzd8+Lrp5)	WNT	Secreted Signaling	KEGG: mmu04310; PMID: 23209147	ds	0.939297	58.2266	45.3807	2.93605e-58	0.258036	24.7764	13.3862	1.10979e-54
Layer_2-3_ExN	Layer_2-3_ExN	Wnt7b	FZD8_LRP5	1.33359e-05	0	WNT7B_FZD8_LRP5	Wnt7b - (Fzd8+Lrp5)	WNT	Secreted Signaling	KEGG: mmu04310; PMID: 23209147	ds	0.224041	40.5088	30.5187	2.49279e-23	0.258036	24.7764	13.3862	1.10979e-54
Layer_2-5_ExN	Layer_2-3_ExN	Wnt7b	FZD8_LRP5	6.90566e-06	0	WNT7B_FZD8_LRP5	Wnt7b - (Fzd8+Lrp5)	WNT	Secreted Signaling	KEGG: mmu04310; PMID: 23209147	ds	0.246409	30.5592	22.6031	6.00783e-08	0.258036	24.7764	13.3862	1.10979e-54
OPC_1	Layer_2-3_ExN	Wnt7b	FZD8_LRP5	2.95759e-06	0	WNT7B_FZD8_LRP5	Wnt7b - (Fzd8+Lrp5)	WNT	Secreted Signaling	KEGG: mmu04310; PMID: 23209147	ds	0.151956	18.8552	15.0971	0.0119837	0.258036	24.7764	13.3862	1.10979e-54
Layer_6b_ExN	Layer_2-5_ExN	Wnt7b	FZD8_LRP5	3.37795e-06	0	WNT7B_FZD8_LRP5	Wnt7b - (Fzd8+Lrp5)	WNT	Secreted Signaling	KEGG: mmu04310; PMID: 23209147	ds	0.567965	24.0741	11.6522	2.0161e-18	0.109842	19.6684	12.83	3.78232e-08
Layer_5-6a_ExN	Layer_2-5_ExN	Wnt7b	FZD8_LRP5	1.92312e-05	0	WNT7B_FZD8_LRP5	Wnt7b - (Fzd8+Lrp5)	WNT	Secreted Signaling	KEGG: mmu04310; PMID: 23209147	ds	0.939297	58.2266	45.3807	2.93605e-58	0.109842	19.6684	12.83	3.78232e-08
Layer_2-3_ExN	Layer_2-5_ExN	Wnt7b	FZD8_LRP5	6.86539e-06	0	WNT7B_FZD8_LRP5	Wnt7b - (Fzd8+Lrp5)	WNT	Secreted Signaling	KEGG: mmu04310; PMID: 23209147	ds	0.224041	40.5088	30.5187	2.49279e-23	0.109842	19.6684	12.83	3.78232e-08
Layer_2-5_ExN	Layer_2-5_ExN	Wnt7b	FZD8_LRP5	3.55506e-06	0	WNT7B_FZD8_LRP5	Wnt7b - (Fzd8+Lrp5)	WNT	Secreted Signaling	KEGG: mmu04310; PMID: 23209147	ds	0.246409	30.5592	22.6031	6.00783e-08	0.109842	19.6684	12.83	3.78232e-08
OPC_1	Layer_2-5_ExN	Wnt7b	FZD8_LRP5	1.52258e-06	0.02	WNT7B_FZD8_LRP5	Wnt7b - (Fzd8+Lrp5)	WNT	Secreted Signaling	KEGG: mmu04310; PMID: 23209147	ds	0.151956	18.8552	15.0971	0.0119837	0.109842	19.6684	12.83	3.78232e-08
Layer_6b_ExN	Astrocyte_1	Wnt7b	FZD8_LRP5	3.84942e-06	0	WNT7B_FZD8_LRP5	Wnt7b - (Fzd8+Lrp5)	WNT	Secreted Signaling	KEGG: mmu04310; PMID: 23209147	ds	0.567965	24.0741	11.6522	2.0161e-18	0.240069	21.792	17.0583	0.000557209
Layer_5-6a_ExN	Astrocyte_1	Wnt7b	FZD8_LRP5	2.19153e-05	0	WNT7B_FZD8_LRP5	Wnt7b - (Fzd8+Lrp5)	WNT	Secreted Signaling	KEGG: mmu04310; PMID: 23209147	ds	0.939297	58.2266	45.3807	2.93605e-58	0.240069	21.792	17.0583	0.000557209
Layer_2-3_ExN	Astrocyte_1	Wnt7b	FZD8_LRP5	7.82361e-06	0	WNT7B_FZD8_LRP5	Wnt7b - (Fzd8+Lrp5)	WNT	Secreted Signaling	KEGG: mmu04310; PMID: 23209147	ds	0.224041	40.5088	30.5187	2.49279e-23	0.240069	21.792	17.0583	0.000557209
Layer_2-5_ExN	Astrocyte_1	Wnt7b	FZD8_LRP5	4.05126e-06	0	WNT7B_FZD8_LRP5	Wnt7b - (Fzd8+Lrp5)	WNT	Secreted Signaling	KEGG: mmu04310; PMID: 23209147	ds	0.246409	30.5592	22.6031	6.00783e-08	0.240069	21.792	17.0583	0.000557209
OPC_1	Astrocyte_1	Wnt7b	FZD8_LRP5	1.73509e-06	0	WNT7B_FZD8_LRP5	Wnt7b - (Fzd8+Lrp5)	WNT	Secreted Signaling	KEGG: mmu04310; PMID: 23209147	ds	0.151956	18.8552	15.0971	0.0119837	0.240069	21.792	17.0583	0.000557209
Layer_6b_ExN	Astrocyte_2	Wnt7b	FZD8_LRP5	1.12485e-05	0	WNT7B_FZD8_LRP5	Wnt7b - (Fzd8+Lrp5)	WNT	Secreted Signaling	KEGG: mmu04310; PMID: 23209147	ds	0.567965	24.0741	11.6522	2.0161e-18	NA	NA	NA	NA
Layer_5-6a_ExN	Astrocyte_2	Wnt7b	FZD8_LRP5	6.40371e-05	0	WNT7B_FZD8_LRP5	Wnt7b - (Fzd8+Lrp5)	WNT	Secreted Signaling	KEGG: mmu04310; PMID: 23209147	ds	0.939297	58.2266	45.3807	2.93605e-58	NA	NA	NA	NA
Layer_2-3_ExN	Astrocyte_2	Wnt7b	FZD8_LRP5	2.28614e-05	0	WNT7B_FZD8_LRP5	Wnt7b - (Fzd8+Lrp5)	WNT	Secreted Signaling	KEGG: mmu04310; PMID: 23209147	ds	0.224041	40.5088	30.5187	2.49279e-23	NA	NA	NA	NA
Layer_2-5_ExN	Astrocyte_2	Wnt7b	FZD8_LRP5	1.18383e-05	0	WNT7B_FZD8_LRP5	Wnt7b - (Fzd8+Lrp5)	WNT	Secreted Signaling	KEGG: mmu04310; PMID: 23209147	ds	0.246409	30.5592	22.6031	6.00783e-08	NA	NA	NA	NA
OPC_1	Astrocyte_2	Wnt7b	FZD8_LRP5	5.07018e-06	0	WNT7B_FZD8_LRP5	Wnt7b - (Fzd8+Lrp5)	WNT	Secreted Signaling	KEGG: mmu04310; PMID: 23209147	ds	0.151956	18.8552	15.0971	0.0119837	NA	NA	NA	NA
InN_3	Vasc_2	Wnt7a	FZD4_LRP6	1.00946e-05	0	WNT7A_FZD4_LRP6	Wnt7a - (Fzd4+Lrp6)	WNT	Secreted Signaling	KEGG: mmu04310; PMID: 23209147	ds	0.0640203	28.4392	26.7644	0.024216	0.324116	21.5807	16.7368	2.05438e-05
InN_3	Vasc_1	Wnt7a	FZD4_LRP6	2.94466e-06	0	WNT7A_FZD4_LRP6	Wnt7a - (Fzd4+Lrp6)	WNT	Secreted Signaling	KEGG: mmu04310; PMID: 23209147	ds	0.0640203	28.4392	26.7644	0.024216	NA	NA	NA	NA
InN_3	Microglia_1	Wnt7a	FZD7_LRP6	5.81422e-06	0	WNT7A_FZD7_LRP6	Wnt7a - (Fzd7+Lrp6)	WNT	Secreted Signaling	KEGG: mmu04310; PMID: 23209147	ds	0.0640203	28.4392	26.7644	0.024216	NA	NA	NA	NA
InN_3	Microglia_2	Wnt7a	FZD7_LRP6	5.52063e-06	0	WNT7A_FZD7_LRP6	Wnt7a - (Fzd7+Lrp6)	WNT	Secreted Signaling	KEGG: mmu04310; PMID: 23209147	ds	0.0640203	28.4392	26.7644	0.024216	NA	NA	NA	NA
InN_3	Fibroblast	Wnt7a	FZD7_LRP6	1.81159e-05	0	WNT7A_FZD7_LRP6	Wnt7a - (Fzd7+Lrp6)	WNT	Secreted Signaling	KEGG: mmu04310; PMID: 23209147	ds	0.0640203	28.4392	26.7644	0.024216	0.934929	32.5851	14.554	2.06772e-30
InN_3	Astrocyte_2	Wnt7a	FZD7_LRP6	6.90698e-06	0	WNT7A_FZD7_LRP6	Wnt7a - (Fzd7+Lrp6)	WNT	Secreted Signaling	KEGG: mmu04310; PMID: 23209147	ds	0.0640203	28.4392	26.7644	0.024216	NA	NA	NA	NA
InN_3	Layer_6b_ExN	Wnt7a	FZD8_LRP6	1.44026e-06	0	WNT7A_FZD8_LRP6	Wnt7a - (Fzd8+Lrp6)	WNT	Secreted Signaling	KEGG: mmu04310; PMID: 23209147	ds	0.0640203	28.4392	26.7644	0.024216	0.140773	10.9428	5.7971	7.63896e-07
InN_3	Subplate	Wnt7a	FZD8_LRP6	2.26065e-06	0	WNT7A_FZD8_LRP6	Wnt7a - (Fzd8+Lrp6)	WNT	Secreted Signaling	KEGG: mmu04310; PMID: 23209147	ds	0.0640203	28.4392	26.7644	0.024216	0.14412	13.4743	8.65417	1.51236e-08
InN_3	Layer_2-4_ExN	Wnt7a	FZD8_LRP6	7.95932e-06	0	WNT7A_FZD8_LRP6	Wnt7a - (Fzd8+Lrp6)	WNT	Secreted Signaling	KEGG: mmu04310; PMID: 23209147	ds	0.0640203	28.4392	26.7644	0.024216	0.206576	14.8188	7.7371	3.69514e-31
InN_3	Layer_2-3_ExN	Wnt7a	FZD8_LRP6	1.25167e-05	0	WNT7A_FZD8_LRP6	Wnt7a - (Fzd8+Lrp6)	WNT	Secreted Signaling	KEGG: mmu04310; PMID: 23209147	ds	0.0640203	28.4392	26.7644	0.024216	0.238045	19.5985	9.62536	2.21767e-54
InN_3	Layer_2-5_ExN	Wnt7a	FZD8_LRP6	8.96341e-06	0	WNT7A_FZD8_LRP6	Wnt7a - (Fzd8+Lrp6)	WNT	Secreted Signaling	KEGG: mmu04310; PMID: 23209147	ds	0.0640203	28.4392	26.7644	0.024216	0.0982258	15.0195	8.89301	1.94001e-08
InN_3	Astrocyte_1	Wnt7a	FZD8_LRP6	2.17386e-06	0	WNT7A_FZD8_LRP6	Wnt7a - (Fzd8+Lrp6)	WNT	Secreted Signaling	KEGG: mmu04310; PMID: 23209147	ds	0.0640203	28.4392	26.7644	0.024216	-0.0103247	14.3805	15.1551	1.80894e-05
InN_3	Astrocyte_2	Wnt7a	FZD8_LRP6	9.56116e-06	0	WNT7A_FZD8_LRP6	Wnt7a - (Fzd8+Lrp6)	WNT	Secreted Signaling	KEGG: mmu04310; PMID: 23209147	ds	0.0640203	28.4392	26.7644	0.024216	NA	NA	NA	NA
InN_3	Vasc_2	Wnt7b	FZD4_LRP6	4.65265e-08	0	WNT7B_FZD4_LRP6	Wnt7b - (Fzd4+Lrp6)	WNT	Secreted Signaling	KEGG: mmu04310; PMID: 23209147	ds	0.0873155	10.1852	8.29912	2.66282e-05	0.324116	21.5807	16.7368	2.05438e-05
Layer_6b_ExN	Vasc_2	Wnt7b	FZD4_LRP6	7.69512e-06	0	WNT7B_FZD4_LRP6	Wnt7b - (Fzd4+Lrp6)	WNT	Secreted Signaling	KEGG: mmu04310; PMID: 23209147	ds	0.567965	24.0741	11.6522	2.0161e-18	0.324116	21.5807	16.7368	2.05438e-05
Subplate	Vasc_2	Wnt7b	FZD4_LRP6	5.34192e-07	0	WNT7B_FZD4_LRP6	Wnt7b - (Fzd4+Lrp6)	WNT	Secreted Signaling	KEGG: mmu04310; PMID: 23209147	ds	0.10747	11.8988	10.2215	0.0401754	0.324116	21.5807	16.7368	2.05438e-05
Layer_5-6a_ExN	Vasc_2	Wnt7b	FZD4_LRP6	4.38087e-05	0	WNT7B_FZD4_LRP6	Wnt7b - (Fzd4+Lrp6)	WNT	Secreted Signaling	KEGG: mmu04310; PMID: 23209147	ds	0.939297	58.2266	45.3807	2.93605e-58	0.324116	21.5807	16.7368	2.05438e-05
Layer_2-3_ExN	Vasc_2	Wnt7b	FZD4_LRP6	1.56396e-05	0	WNT7B_FZD4_LRP6	Wnt7b - (Fzd4+Lrp6)	WNT	Secreted Signaling	KEGG: mmu04310; PMID: 23209147	ds	0.224041	40.5088	30.5187	2.49279e-23	0.324116	21.5807	16.7368	2.05438e-05
Layer_2-5_ExN	Vasc_2	Wnt7b	FZD4_LRP6	8.09859e-06	0	WNT7B_FZD4_LRP6	Wnt7b - (Fzd4+Lrp6)	WNT	Secreted Signaling	KEGG: mmu04310; PMID: 23209147	ds	0.246409	30.5592	22.6031	6.00783e-08	0.324116	21.5807	16.7368	2.05438e-05
OPC_1	Vasc_2	Wnt7b	FZD4_LRP6	3.46851e-06	0	WNT7B_FZD4_LRP6	Wnt7b - (Fzd4+Lrp6)	WNT	Secreted Signaling	KEGG: mmu04310; PMID: 23209147	ds	0.151956	18.8552	15.0971	0.0119837	0.324116	21.5807	16.7368	2.05438e-05
InN_3	Vasc_1	Wnt7b	FZD4_LRP6	1.3572e-08	0	WNT7B_FZD4_LRP6	Wnt7b - (Fzd4+Lrp6)	WNT	Secreted Signaling	KEGG: mmu04310; PMID: 23209147	ds	0.0873155	10.1852	8.29912	2.66282e-05	NA	NA	NA	NA
Layer_6b_ExN	Vasc_1	Wnt7b	FZD4_LRP6	2.24471e-06	0	WNT7B_FZD4_LRP6	Wnt7b - (Fzd4+Lrp6)	WNT	Secreted Signaling	KEGG: mmu04310; PMID: 23209147	ds	0.567965	24.0741	11.6522	2.0161e-18	NA	NA	NA	NA
Subplate	Vasc_1	Wnt7b	FZD4_LRP6	1.55826e-07	0	WNT7B_FZD4_LRP6	Wnt7b - (Fzd4+Lrp6)	WNT	Secreted Signaling	KEGG: mmu04310; PMID: 23209147	ds	0.10747	11.8988	10.2215	0.0401754	NA	NA	NA	NA
Layer_5-6a_ExN	Vasc_1	Wnt7b	FZD4_LRP6	1.27796e-05	0	WNT7B_FZD4_LRP6	Wnt7b - (Fzd4+Lrp6)	WNT	Secreted Signaling	KEGG: mmu04310; PMID: 23209147	ds	0.939297	58.2266	45.3807	2.93605e-58	NA	NA	NA	NA
Layer_2-3_ExN	Vasc_1	Wnt7b	FZD4_LRP6	4.56218e-06	0	WNT7B_FZD4_LRP6	Wnt7b - (Fzd4+Lrp6)	WNT	Secreted Signaling	KEGG: mmu04310; PMID: 23209147	ds	0.224041	40.5088	30.5187	2.49279e-23	NA	NA	NA	NA
Layer_2-5_ExN	Vasc_1	Wnt7b	FZD4_LRP6	2.36241e-06	0	WNT7B_FZD4_LRP6	Wnt7b - (Fzd4+Lrp6)	WNT	Secreted Signaling	KEGG: mmu04310; PMID: 23209147	ds	0.246409	30.5592	22.6031	6.00783e-08	NA	NA	NA	NA
OPC_1	Vasc_1	Wnt7b	FZD4_LRP6	1.01178e-06	0	WNT7B_FZD4_LRP6	Wnt7b - (Fzd4+Lrp6)	WNT	Secreted Signaling	KEGG: mmu04310; PMID: 23209147	ds	0.151956	18.8552	15.0971	0.0119837	NA	NA	NA	NA
InN_3	Microglia_2	Wnt7b	FZD7_LRP6	2.54447e-08	0.04	WNT7B_FZD7_LRP6	Wnt7b - (Fzd7+Lrp6)	WNT	Secreted Signaling	KEGG: mmu04310; PMID: 23209147	ds	0.0873155	10.1852	8.29912	2.66282e-05	NA	NA	NA	NA
Layer_6b_ExN	Microglia_2	Wnt7b	FZD7_LRP6	4.20837e-06	0	WNT7B_FZD7_LRP6	Wnt7b - (Fzd7+Lrp6)	WNT	Secreted Signaling	KEGG: mmu04310; PMID: 23209147	ds	0.567965	24.0741	11.6522	2.0161e-18	NA	NA	NA	NA
Subplate	Microglia_2	Wnt7b	FZD7_LRP6	2.92142e-07	0.04	WNT7B_FZD7_LRP6	Wnt7b - (Fzd7+Lrp6)	WNT	Secreted Signaling	KEGG: mmu04310; PMID: 23209147	ds	0.10747	11.8988	10.2215	0.0401754	NA	NA	NA	NA
Layer_5-6a_ExN	Microglia_2	Wnt7b	FZD7_LRP6	2.39588e-05	0	WNT7B_FZD7_LRP6	Wnt7b - (Fzd7+Lrp6)	WNT	Secreted Signaling	KEGG: mmu04310; PMID: 23209147	ds	0.939297	58.2266	45.3807	2.93605e-58	NA	NA	NA	NA
Layer_2-3_ExN	Microglia_2	Wnt7b	FZD7_LRP6	8.55315e-06	0	WNT7B_FZD7_LRP6	Wnt7b - (Fzd7+Lrp6)	WNT	Secreted Signaling	KEGG: mmu04310; PMID: 23209147	ds	0.224041	40.5088	30.5187	2.49279e-23	NA	NA	NA	NA
Layer_2-5_ExN	Microglia_2	Wnt7b	FZD7_LRP6	4.42903e-06	0	WNT7B_FZD7_LRP6	Wnt7b - (Fzd7+Lrp6)	WNT	Secreted Signaling	KEGG: mmu04310; PMID: 23209147	ds	0.246409	30.5592	22.6031	6.00783e-08	NA	NA	NA	NA
OPC_1	Microglia_2	Wnt7b	FZD7_LRP6	1.89689e-06	0.04	WNT7B_FZD7_LRP6	Wnt7b - (Fzd7+Lrp6)	WNT	Secreted Signaling	KEGG: mmu04310; PMID: 23209147	ds	0.151956	18.8552	15.0971	0.0119837	NA	NA	NA	NA
InN_3	Fibroblast	Wnt7b	FZD7_LRP6	8.34979e-08	0	WNT7B_FZD7_LRP6	Wnt7b - (Fzd7+Lrp6)	WNT	Secreted Signaling	KEGG: mmu04310; PMID: 23209147	ds	0.0873155	10.1852	8.29912	2.66282e-05	0.934929	32.5851	14.554	2.06772e-30
Layer_6b_ExN	Fibroblast	Wnt7b	FZD7_LRP6	1.38098e-05	0	WNT7B_FZD7_LRP6	Wnt7b - (Fzd7+Lrp6)	WNT	Secreted Signaling	KEGG: mmu04310; PMID: 23209147	ds	0.567965	24.0741	11.6522	2.0161e-18	0.934929	32.5851	14.554	2.06772e-30
Subplate	Fibroblast	Wnt7b	FZD7_LRP6	9.58676e-07	0	WNT7B_FZD7_LRP6	Wnt7b - (Fzd7+Lrp6)	WNT	Secreted Signaling	KEGG: mmu04310; PMID: 23209147	ds	0.10747	11.8988	10.2215	0.0401754	0.934929	32.5851	14.554	2.06772e-30
Layer_5-6a_ExN	Fibroblast	Wnt7b	FZD7_LRP6	7.86176e-05	0	WNT7B_FZD7_LRP6	Wnt7b - (Fzd7+Lrp6)	WNT	Secreted Signaling	KEGG: mmu04310; PMID: 23209147	ds	0.939297	58.2266	45.3807	2.93605e-58	0.934929	32.5851	14.554	2.06772e-30
Layer_2-3_ExN	Fibroblast	Wnt7b	FZD7_LRP6	2.80669e-05	0	WNT7B_FZD7_LRP6	Wnt7b - (Fzd7+Lrp6)	WNT	Secreted Signaling	KEGG: mmu04310; PMID: 23209147	ds	0.224041	40.5088	30.5187	2.49279e-23	0.934929	32.5851	14.554	2.06772e-30
Layer_2-5_ExN	Fibroblast	Wnt7b	FZD7_LRP6	1.45339e-05	0	WNT7B_FZD7_LRP6	Wnt7b - (Fzd7+Lrp6)	WNT	Secreted Signaling	KEGG: mmu04310; PMID: 23209147	ds	0.246409	30.5592	22.6031	6.00783e-08	0.934929	32.5851	14.554	2.06772e-30
OPC_1	Fibroblast	Wnt7b	FZD7_LRP6	6.22468e-06	0	WNT7B_FZD7_LRP6	Wnt7b - (Fzd7+Lrp6)	WNT	Secreted Signaling	KEGG: mmu04310; PMID: 23209147	ds	0.151956	18.8552	15.0971	0.0119837	0.934929	32.5851	14.554	2.06772e-30
InN_3	Astrocyte_2	Wnt7b	FZD7_LRP6	3.18345e-08	0	WNT7B_FZD7_LRP6	Wnt7b - (Fzd7+Lrp6)	WNT	Secreted Signaling	KEGG: mmu04310; PMID: 23209147	ds	0.0873155	10.1852	8.29912	2.66282e-05	NA	NA	NA	NA
Layer_6b_ExN	Astrocyte_2	Wnt7b	FZD7_LRP6	5.26519e-06	0	WNT7B_FZD7_LRP6	Wnt7b - (Fzd7+Lrp6)	WNT	Secreted Signaling	KEGG: mmu04310; PMID: 23209147	ds	0.567965	24.0741	11.6522	2.0161e-18	NA	NA	NA	NA
Subplate	Astrocyte_2	Wnt7b	FZD7_LRP6	3.65506e-07	0	WNT7B_FZD7_LRP6	Wnt7b - (Fzd7+Lrp6)	WNT	Secreted Signaling	KEGG: mmu04310; PMID: 23209147	ds	0.10747	11.8988	10.2215	0.0401754	NA	NA	NA	NA
Layer_5-6a_ExN	Astrocyte_2	Wnt7b	FZD7_LRP6	2.99753e-05	0	WNT7B_FZD7_LRP6	Wnt7b - (Fzd7+Lrp6)	WNT	Secreted Signaling	KEGG: mmu04310; PMID: 23209147	ds	0.939297	58.2266	45.3807	2.93605e-58	NA	NA	NA	NA
Layer_2-3_ExN	Astrocyte_2	Wnt7b	FZD7_LRP6	1.0701e-05	0	WNT7B_FZD7_LRP6	Wnt7b - (Fzd7+Lrp6)	WNT	Secreted Signaling	KEGG: mmu04310; PMID: 23209147	ds	0.224041	40.5088	30.5187	2.49279e-23	NA	NA	NA	NA
Layer_2-5_ExN	Astrocyte_2	Wnt7b	FZD7_LRP6	5.54126e-06	0	WNT7B_FZD7_LRP6	Wnt7b - (Fzd7+Lrp6)	WNT	Secreted Signaling	KEGG: mmu04310; PMID: 23209147	ds	0.246409	30.5592	22.6031	6.00783e-08	NA	NA	NA	NA
OPC_1	Astrocyte_2	Wnt7b	FZD7_LRP6	2.37324e-06	0	WNT7B_FZD7_LRP6	Wnt7b - (Fzd7+Lrp6)	WNT	Secreted Signaling	KEGG: mmu04310; PMID: 23209147	ds	0.151956	18.8552	15.0971	0.0119837	NA	NA	NA	NA
Layer_5-6a_ExN	Layer_6b_ExN	Wnt7b	FZD8_LRP6	6.25065e-06	0	WNT7B_FZD8_LRP6	Wnt7b - (Fzd8+Lrp6)	WNT	Secreted Signaling	KEGG: mmu04310; PMID: 23209147	ds	0.939297	58.2266	45.3807	2.93605e-58	0.140773	10.9428	5.7971	7.63896e-07
Layer_2-3_ExN	Layer_6b_ExN	Wnt7b	FZD8_LRP6	2.23142e-06	0.02	WNT7B_FZD8_LRP6	Wnt7b - (Fzd8+Lrp6)	WNT	Secreted Signaling	KEGG: mmu04310; PMID: 23209147	ds	0.224041	40.5088	30.5187	2.49279e-23	0.140773	10.9428	5.7971	7.63896e-07
Layer_6b_ExN	Subplate	Wnt7b	FZD8_LRP6	1.72329e-06	0.01	WNT7B_FZD8_LRP6	Wnt7b - (Fzd8+Lrp6)	WNT	Secreted Signaling	KEGG: mmu04310; PMID: 23209147	ds	0.567965	24.0741	11.6522	2.0161e-18	0.14412	13.4743	8.65417	1.51236e-08
Layer_5-6a_ExN	Subplate	Wnt7b	FZD8_LRP6	9.81105e-06	0	WNT7B_FZD8_LRP6	Wnt7b - (Fzd8+Lrp6)	WNT	Secreted Signaling	KEGG: mmu04310; PMID: 23209147	ds	0.939297	58.2266	45.3807	2.93605e-58	0.14412	13.4743	8.65417	1.51236e-08
Layer_2-3_ExN	Subplate	Wnt7b	FZD8_LRP6	3.50245e-06	0	WNT7B_FZD8_LRP6	Wnt7b - (Fzd8+Lrp6)	WNT	Secreted Signaling	KEGG: mmu04310; PMID: 23209147	ds	0.224041	40.5088	30.5187	2.49279e-23	0.14412	13.4743	8.65417	1.51236e-08
Layer_2-5_ExN	Subplate	Wnt7b	FZD8_LRP6	1.81365e-06	0.01	WNT7B_FZD8_LRP6	Wnt7b - (Fzd8+Lrp6)	WNT	Secreted Signaling	KEGG: mmu04310; PMID: 23209147	ds	0.246409	30.5592	22.6031	6.00783e-08	0.14412	13.4743	8.65417	1.51236e-08
Layer_6b_ExN	Layer_2-4_ExN	Wnt7b	FZD8_LRP6	6.06739e-06	0	WNT7B_FZD8_LRP6	Wnt7b - (Fzd8+Lrp6)	WNT	Secreted Signaling	KEGG: mmu04310; PMID: 23209147	ds	0.567965	24.0741	11.6522	2.0161e-18	0.206576	14.8188	7.7371	3.69514e-31
Layer_5-6a_ExN	Layer_2-4_ExN	Wnt7b	FZD8_LRP6	3.45422e-05	0	WNT7B_FZD8_LRP6	Wnt7b - (Fzd8+Lrp6)	WNT	Secreted Signaling	KEGG: mmu04310; PMID: 23209147	ds	0.939297	58.2266	45.3807	2.93605e-58	0.206576	14.8188	7.7371	3.69514e-31
Layer_2-3_ExN	Layer_2-4_ExN	Wnt7b	FZD8_LRP6	1.23314e-05	0	WNT7B_FZD8_LRP6	Wnt7b - (Fzd8+Lrp6)	WNT	Secreted Signaling	KEGG: mmu04310; PMID: 23209147	ds	0.224041	40.5088	30.5187	2.49279e-23	0.206576	14.8188	7.7371	3.69514e-31
Layer_2-5_ExN	Layer_2-4_ExN	Wnt7b	FZD8_LRP6	6.38552e-06	0	WNT7B_FZD8_LRP6	Wnt7b - (Fzd8+Lrp6)	WNT	Secreted Signaling	KEGG: mmu04310; PMID: 23209147	ds	0.246409	30.5592	22.6031	6.00783e-08	0.206576	14.8188	7.7371	3.69514e-31
OPC_1	Layer_2-4_ExN	Wnt7b	FZD8_LRP6	2.73483e-06	0	WNT7B_FZD8_LRP6	Wnt7b - (Fzd8+Lrp6)	WNT	Secreted Signaling	KEGG: mmu04310; PMID: 23209147	ds	0.151956	18.8552	15.0971	0.0119837	0.206576	14.8188	7.7371	3.69514e-31
Layer_6b_ExN	Layer_2-3_ExN	Wnt7b	FZD8_LRP6	9.54149e-06	0	WNT7B_FZD8_LRP6	Wnt7b - (Fzd8+Lrp6)	WNT	Secreted Signaling	KEGG: mmu04310; PMID: 23209147	ds	0.567965	24.0741	11.6522	2.0161e-18	0.238045	19.5985	9.62536	2.21767e-54
Layer_5-6a_ExN	Layer_2-3_ExN	Wnt7b	FZD8_LRP6	5.43197e-05	0	WNT7B_FZD8_LRP6	Wnt7b - (Fzd8+Lrp6)	WNT	Secreted Signaling	KEGG: mmu04310; PMID: 23209147	ds	0.939297	58.2266	45.3807	2.93605e-58	0.238045	19.5985	9.62536	2.21767e-54
Layer_2-3_ExN	Layer_2-3_ExN	Wnt7b	FZD8_LRP6	1.93921e-05	0	WNT7B_FZD8_LRP6	Wnt7b - (Fzd8+Lrp6)	WNT	Secreted Signaling	KEGG: mmu04310; PMID: 23209147	ds	0.224041	40.5088	30.5187	2.49279e-23	0.238045	19.5985	9.62536	2.21767e-54
Layer_2-5_ExN	Layer_2-3_ExN	Wnt7b	FZD8_LRP6	1.00418e-05	0	WNT7B_FZD8_LRP6	Wnt7b - (Fzd8+Lrp6)	WNT	Secreted Signaling	KEGG: mmu04310; PMID: 23209147	ds	0.246409	30.5592	22.6031	6.00783e-08	0.238045	19.5985	9.62536	2.21767e-54
OPC_1	Layer_2-3_ExN	Wnt7b	FZD8_LRP6	4.30075e-06	0	WNT7B_FZD8_LRP6	Wnt7b - (Fzd8+Lrp6)	WNT	Secreted Signaling	KEGG: mmu04310; PMID: 23209147	ds	0.151956	18.8552	15.0971	0.0119837	0.238045	19.5985	9.62536	2.21767e-54
Layer_6b_ExN	Layer_2-5_ExN	Wnt7b	FZD8_LRP6	6.83281e-06	0	WNT7B_FZD8_LRP6	Wnt7b - (Fzd8+Lrp6)	WNT	Secreted Signaling	KEGG: mmu04310; PMID: 23209147	ds	0.567965	24.0741	11.6522	2.0161e-18	0.0982258	15.0195	8.89301	1.94001e-08
Layer_5-6a_ExN	Layer_2-5_ExN	Wnt7b	FZD8_LRP6	3.88996e-05	0	WNT7B_FZD8_LRP6	Wnt7b - (Fzd8+Lrp6)	WNT	Secreted Signaling	KEGG: mmu04310; PMID: 23209147	ds	0.939297	58.2266	45.3807	2.93605e-58	0.0982258	15.0195	8.89301	1.94001e-08
Layer_2-3_ExN	Layer_2-5_ExN	Wnt7b	FZD8_LRP6	1.3887e-05	0	WNT7B_FZD8_LRP6	Wnt7b - (Fzd8+Lrp6)	WNT	Secreted Signaling	KEGG: mmu04310; PMID: 23209147	ds	0.224041	40.5088	30.5187	2.49279e-23	0.0982258	15.0195	8.89301	1.94001e-08
Layer_2-5_ExN	Layer_2-5_ExN	Wnt7b	FZD8_LRP6	7.19107e-06	0	WNT7B_FZD8_LRP6	Wnt7b - (Fzd8+Lrp6)	WNT	Secreted Signaling	KEGG: mmu04310; PMID: 23209147	ds	0.246409	30.5592	22.6031	6.00783e-08	0.0982258	15.0195	8.89301	1.94001e-08
OPC_1	Layer_2-5_ExN	Wnt7b	FZD8_LRP6	3.07983e-06	0	WNT7B_FZD8_LRP6	Wnt7b - (Fzd8+Lrp6)	WNT	Secreted Signaling	KEGG: mmu04310; PMID: 23209147	ds	0.151956	18.8552	15.0971	0.0119837	0.0982258	15.0195	8.89301	1.94001e-08
Layer_6b_ExN	Astrocyte_1	Wnt7b	FZD8_LRP6	1.65713e-06	0.03	WNT7B_FZD8_LRP6	Wnt7b - (Fzd8+Lrp6)	WNT	Secreted Signaling	KEGG: mmu04310; PMID: 23209147	ds	0.567965	24.0741	11.6522	2.0161e-18	-0.0103247	14.3805	15.1551	1.80894e-05
Layer_5-6a_ExN	Astrocyte_1	Wnt7b	FZD8_LRP6	9.43439e-06	0	WNT7B_FZD8_LRP6	Wnt7b - (Fzd8+Lrp6)	WNT	Secreted Signaling	KEGG: mmu04310; PMID: 23209147	ds	0.939297	58.2266	45.3807	2.93605e-58	-0.0103247	14.3805	15.1551	1.80894e-05
Layer_2-3_ExN	Astrocyte_1	Wnt7b	FZD8_LRP6	3.36798e-06	0	WNT7B_FZD8_LRP6	Wnt7b - (Fzd8+Lrp6)	WNT	Secreted Signaling	KEGG: mmu04310; PMID: 23209147	ds	0.224041	40.5088	30.5187	2.49279e-23	-0.0103247	14.3805	15.1551	1.80894e-05
Layer_2-5_ExN	Astrocyte_1	Wnt7b	FZD8_LRP6	1.74402e-06	0.01	WNT7B_FZD8_LRP6	Wnt7b - (Fzd8+Lrp6)	WNT	Secreted Signaling	KEGG: mmu04310; PMID: 23209147	ds	0.246409	30.5592	22.6031	6.00783e-08	-0.0103247	14.3805	15.1551	1.80894e-05
Layer_6b_ExN	Astrocyte_2	Wnt7b	FZD8_LRP6	7.28848e-06	0	WNT7B_FZD8_LRP6	Wnt7b - (Fzd8+Lrp6)	WNT	Secreted Signaling	KEGG: mmu04310; PMID: 23209147	ds	0.567965	24.0741	11.6522	2.0161e-18	NA	NA	NA	NA
Layer_5-6a_ExN	Astrocyte_2	Wnt7b	FZD8_LRP6	4.14937e-05	0	WNT7B_FZD8_LRP6	Wnt7b - (Fzd8+Lrp6)	WNT	Secreted Signaling	KEGG: mmu04310; PMID: 23209147	ds	0.939297	58.2266	45.3807	2.93605e-58	NA	NA	NA	NA
Layer_2-3_ExN	Astrocyte_2	Wnt7b	FZD8_LRP6	1.48131e-05	0	WNT7B_FZD8_LRP6	Wnt7b - (Fzd8+Lrp6)	WNT	Secreted Signaling	KEGG: mmu04310; PMID: 23209147	ds	0.224041	40.5088	30.5187	2.49279e-23	NA	NA	NA	NA
Layer_2-5_ExN	Astrocyte_2	Wnt7b	FZD8_LRP6	7.67063e-06	0	WNT7B_FZD8_LRP6	Wnt7b - (Fzd8+Lrp6)	WNT	Secreted Signaling	KEGG: mmu04310; PMID: 23209147	ds	0.246409	30.5592	22.6031	6.00783e-08	NA	NA	NA	NA
Piriform_1	Vasc_2	Vegfa	Flt1	3.21588e-05	0	VEGFA_VEGFR1	Vegfa - Vegfr1	VEGF	Secreted Signaling	KEGG: mmu04370; PMID: 16633338	ds	0.220537	21.0243	14.8416	1.12927e-15	-1.32637	48.4305	54.4996	1.30923e-08
Layer_6b_ExN	Vasc_2	Vegfa	Flt1	3.52246e-05	0	VEGFA_VEGFR1	Vegfa - Vegfr1	VEGF	Secreted Signaling	KEGG: mmu04370; PMID: 16633338	ds	0.176843	20.5387	15.5942	0.000786007	-1.32637	48.4305	54.4996	1.30923e-08
Layer_2-4_ExN	Vasc_2	Vegfa	Flt1	0.00012636	0	VEGFA_VEGFR1	Vegfa - Vegfr1	VEGF	Secreted Signaling	KEGG: mmu04370; PMID: 16633338	ds	0.328906	36.648	28.1198	1.18741e-18	-1.32637	48.4305	54.4996	1.30923e-08
Layer_5-6a_ExN	Vasc_2	Vegfa	Flt1	4.60976e-05	0	VEGFA_VEGFR1	Vegfa - Vegfr1	VEGF	Secreted Signaling	KEGG: mmu04370; PMID: 16633338	ds	0.0647601	24.2693	20.938	2.79646e-05	-1.32637	48.4305	54.4996	1.30923e-08
Layer_2-3_ExN	Vasc_2	Vegfa	Flt1	0.000117944	0	VEGFA_VEGFR1	Vegfa - Vegfr1	VEGF	Secreted Signaling	KEGG: mmu04370; PMID: 16633338	ds	0.237797	40.8468	31.9452	2.34048e-21	-1.32637	48.4305	54.4996	1.30923e-08
Layer_2-5_ExN	Vasc_2	Vegfa	Flt1	0.000229394	0	VEGFA_VEGFR1	Vegfa - Vegfr1	VEGF	Secreted Signaling	KEGG: mmu04370; PMID: 16633338	ds	0.317676	61.3784	49.421	4.14241e-10	-1.32637	48.4305	54.4996	1.30923e-08
Astrocyte_1	Vasc_2	Vegfa	Flt1	0.00033252	0	VEGFA_VEGFR1	Vegfa - Vegfr1	VEGF	Secreted Signaling	KEGG: mmu04370; PMID: 16633338	ds	1.15015	48.5988	44.5489	1.27571e-05	-1.32637	48.4305	54.4996	1.30923e-08
Fibroblast	Vasc_2	Vegfa	Flt1	0.000252894	0	VEGFA_VEGFR1	Vegfa - Vegfr1	VEGF	Secreted Signaling	KEGG: mmu04370; PMID: 16633338	ds	0.856191	38.8545	31.053	1.95835e-05	-1.32637	48.4305	54.4996	1.30923e-08
Astrocyte_2	Vasc_2	Vegfa	Flt1	0.0003863	0	VEGFA_VEGFR1	Vegfa - Vegfr1	VEGF	Secreted Signaling	KEGG: mmu04370; PMID: 16633338	ds	0.557302	57.9832	45.641	0.0404523	-1.32637	48.4305	54.4996	1.30923e-08
Piriform_1	Astrocyte_2	Vegfa	Flt1	5.24914e-06	0	VEGFA_VEGFR1	Vegfa - Vegfr1	VEGF	Secreted Signaling	KEGG: mmu04370; PMID: 16633338	ds	0.220537	21.0243	14.8416	1.12927e-15	NA	NA	NA	NA
Layer_6b_ExN	Astrocyte_2	Vegfa	Flt1	5.74957e-06	0	VEGFA_VEGFR1	Vegfa - Vegfr1	VEGF	Secreted Signaling	KEGG: mmu04370; PMID: 16633338	ds	0.176843	20.5387	15.5942	0.000786007	NA	NA	NA	NA
Layer_2-4_ExN	Astrocyte_2	Vegfa	Flt1	2.06268e-05	0	VEGFA_VEGFR1	Vegfa - Vegfr1	VEGF	Secreted Signaling	KEGG: mmu04370; PMID: 16633338	ds	0.328906	36.648	28.1198	1.18741e-18	NA	NA	NA	NA
Layer_5-6a_ExN	Astrocyte_2	Vegfa	Flt1	7.52439e-06	0	VEGFA_VEGFR1	Vegfa - Vegfr1	VEGF	Secreted Signaling	KEGG: mmu04370; PMID: 16633338	ds	0.0647601	24.2693	20.938	2.79646e-05	NA	NA	NA	NA
Layer_2-3_ExN	Astrocyte_2	Vegfa	Flt1	1.92528e-05	0	VEGFA_VEGFR1	Vegfa - Vegfr1	VEGF	Secreted Signaling	KEGG: mmu04370; PMID: 16633338	ds	0.237797	40.8468	31.9452	2.34048e-21	NA	NA	NA	NA
Layer_2-5_ExN	Astrocyte_2	Vegfa	Flt1	3.74492e-05	0	VEGFA_VEGFR1	Vegfa - Vegfr1	VEGF	Secreted Signaling	KEGG: mmu04370; PMID: 16633338	ds	0.317676	61.3784	49.421	4.14241e-10	NA	NA	NA	NA
Astrocyte_1	Astrocyte_2	Vegfa	Flt1	5.42894e-05	0	VEGFA_VEGFR1	Vegfa - Vegfr1	VEGF	Secreted Signaling	KEGG: mmu04370; PMID: 16633338	ds	1.15015	48.5988	44.5489	1.27571e-05	NA	NA	NA	NA
Fibroblast	Astrocyte_2	Vegfa	Flt1	4.12863e-05	0	VEGFA_VEGFR1	Vegfa - Vegfr1	VEGF	Secreted Signaling	KEGG: mmu04370; PMID: 16633338	ds	0.856191	38.8545	31.053	1.95835e-05	NA	NA	NA	NA
Astrocyte_2	Astrocyte_2	Vegfa	Flt1	6.30727e-05	0	VEGFA_VEGFR1	Vegfa - Vegfr1	VEGF	Secreted Signaling	KEGG: mmu04370; PMID: 16633338	ds	0.557302	57.9832	45.641	0.0404523	NA	NA	NA	NA
Piriform_1	Vasc_1	Vegfa	Flt1	1.57733e-05	0	VEGFA_VEGFR1	Vegfa - Vegfr1	VEGF	Secreted Signaling	KEGG: mmu04370; PMID: 16633338	ds	0.220537	21.0243	14.8416	1.12927e-15	NA	NA	NA	NA
Layer_6b_ExN	Vasc_1	Vegfa	Flt1	1.7277e-05	0	VEGFA_VEGFR1	Vegfa - Vegfr1	VEGF	Secreted Signaling	KEGG: mmu04370; PMID: 16633338	ds	0.176843	20.5387	15.5942	0.000786007	NA	NA	NA	NA
Layer_2-4_ExN	Vasc_1	Vegfa	Flt1	6.19802e-05	0	VEGFA_VEGFR1	Vegfa - Vegfr1	VEGF	Secreted Signaling	KEGG: mmu04370; PMID: 16633338	ds	0.328906	36.648	28.1198	1.18741e-18	NA	NA	NA	NA
Layer_5-6a_ExN	Vasc_1	Vegfa	Flt1	2.26102e-05	0	VEGFA_VEGFR1	Vegfa - Vegfr1	VEGF	Secreted Signaling	KEGG: mmu04370; PMID: 16633338	ds	0.0647601	24.2693	20.938	2.79646e-05	NA	NA	NA	NA
Layer_2-3_ExN	Vasc_1	Vegfa	Flt1	5.78516e-05	0	VEGFA_VEGFR1	Vegfa - Vegfr1	VEGF	Secreted Signaling	KEGG: mmu04370; PMID: 16633338	ds	0.237797	40.8468	31.9452	2.34048e-21	NA	NA	NA	NA
Layer_2-5_ExN	Vasc_1	Vegfa	Flt1	0.000112525	0	VEGFA_VEGFR1	Vegfa - Vegfr1	VEGF	Secreted Signaling	KEGG: mmu04370; PMID: 16633338	ds	0.317676	61.3784	49.421	4.14241e-10	NA	NA	NA	NA
Astrocyte_1	Vasc_1	Vegfa	Flt1	0.00016312	0	VEGFA_VEGFR1	Vegfa - Vegfr1	VEGF	Secreted Signaling	KEGG: mmu04370; PMID: 16633338	ds	1.15015	48.5988	44.5489	1.27571e-05	NA	NA	NA	NA
Fibroblast	Vasc_1	Vegfa	Flt1	0.000124053	0	VEGFA_VEGFR1	Vegfa - Vegfr1	VEGF	Secreted Signaling	KEGG: mmu04370; PMID: 16633338	ds	0.856191	38.8545	31.053	1.95835e-05	NA	NA	NA	NA
Astrocyte_2	Vasc_1	Vegfa	Flt1	0.000189507	0	VEGFA_VEGFR1	Vegfa - Vegfr1	VEGF	Secreted Signaling	KEGG: mmu04370; PMID: 16633338	ds	0.557302	57.9832	45.641	0.0404523	NA	NA	NA	NA
Piriform_1	Microglia_1	Cx3cl1	Cx3cr1	0.000538478	0	CX3CL1_CX3CR1	Cx3cl1 - Cx3cr1	CX3C	Secreted Signaling	KEGG: mmu04060	ds	0.254109	48.0054	40.2965	7.56525e-13	NA	NA	NA	NA
Piriform_2	Microglia_1	Cx3cl1	Cx3cr1	0.000107578	0	CX3CL1_CX3CR1	Cx3cl1 - Cx3cr1	CX3C	Secreted Signaling	KEGG: mmu04060	ds	0.270978	15.5935	12.7596	0.000191719	NA	NA	NA	NA
Piriform_1	Microglia_2	Cx3cl1	Cx3cr1	0.000474111	0	CX3CL1_CX3CR1	Cx3cl1 - Cx3cr1	CX3C	Secreted Signaling	KEGG: mmu04060	ds	0.254109	48.0054	40.2965	7.56525e-13	NA	NA	NA	NA
Piriform_2	Microglia_2	Cx3cl1	Cx3cr1	9.47135e-05	0	CX3CL1_CX3CR1	Cx3cl1 - Cx3cr1	CX3C	Secreted Signaling	KEGG: mmu04060	ds	0.270978	15.5935	12.7596	0.000191719	NA	NA	NA	NA
Layer_5-6a_ExN	Microglia_2	Cx3cl1	Cx3cr1	0.000301716	0	CX3CL1_CX3CR1	Cx3cl1 - Cx3cr1	CX3C	Secreted Signaling	KEGG: mmu04060	ds	0.169461	39.8358	32.6504	6.35265e-14	NA	NA	NA	NA
Astrocyte_1	Microglia_2	Cx3cl1	Cx3cr1	3.41298e-06	0	CX3CL1_CX3CR1	Cx3cl1 - Cx3cr1	CX3C	Secreted Signaling	KEGG: mmu04060	ds	0.120679	10.6932	8.55263	0.0274838	NA	NA	NA	NA
Astrocyte_2	Microglia_2	Cx3cl1	Cx3cr1	8.7762e-06	0	CX3CL1_CX3CR1	Cx3cl1 - Cx3cr1	CX3C	Secreted Signaling	KEGG: mmu04060	ds	0.220292	10.9244	4.61538	0.0305443	NA	NA	NA	NA
OPC_1	Microglia_2	Cx3cl1	Cx3cr1	0.000112673	0	CX3CL1_CX3CR1	Cx3cl1 - Cx3cr1	CX3C	Secreted Signaling	KEGG: mmu04060	ds	0.255388	23.4568	19.8418	0.0259397	NA	NA	NA	NA
Layer_2-3_ExN	InN_3	Mdk	Lrp1	7.6075e-05	0	MDK_LRP1	Mdk - Lrp1	MK	Secreted Signaling	PMID: 28356350	ds	0.0682283	20.6718	15.562	7.78598e-11	1.8643	73.2069	68.4262	1.08708e-57
Vasc_2	InN_3	Mdk	Lrp1	4.2556e-06	0	MDK_LRP1	Mdk - Lrp1	MK	Secreted Signaling	PMID: 28356350	ds	0.10012	10.7063	8.70479	0.0321349	1.8643	73.2069	68.4262	1.08708e-57
Fibroblast	InN_3	Mdk	Lrp1	0.00026414	0	MDK_LRP1	Mdk - Lrp1	MK	Secreted Signaling	PMID: 28356350	ds	0.266763	29.5666	19.8524	1.40236e-08	1.8643	73.2069	68.4262	1.08708e-57
Layer_2-3_ExN	InN_1	Mdk	Lrp1	1.92345e-05	0	MDK_LRP1	Mdk - Lrp1	MK	Secreted Signaling	PMID: 28356350	ds	0.0682283	20.6718	15.562	7.78598e-11	NA	NA	NA	NA
Vasc_2	InN_1	Mdk	Lrp1	1.07591e-06	0.02	MDK_LRP1	Mdk - Lrp1	MK	Secreted Signaling	PMID: 28356350	ds	0.10012	10.7063	8.70479	0.0321349	NA	NA	NA	NA
Fibroblast	InN_1	Mdk	Lrp1	6.67933e-05	0	MDK_LRP1	Mdk - Lrp1	MK	Secreted Signaling	PMID: 28356350	ds	0.266763	29.5666	19.8524	1.40236e-08	NA	NA	NA	NA
Layer_2-3_ExN	Piriform_1	Mdk	Lrp1	0.00011234	0	MDK_LRP1	Mdk - Lrp1	MK	Secreted Signaling	PMID: 28356350	ds	0.0682283	20.6718	15.562	7.78598e-11	3.36717	92.8302	87.4158	3.54818e-144
Vasc_2	Piriform_1	Mdk	Lrp1	6.28446e-06	0	MDK_LRP1	Mdk - Lrp1	MK	Secreted Signaling	PMID: 28356350	ds	0.10012	10.7063	8.70479	0.0321349	3.36717	92.8302	87.4158	3.54818e-144
Fibroblast	Piriform_1	Mdk	Lrp1	0.000390021	0	MDK_LRP1	Mdk - Lrp1	MK	Secreted Signaling	PMID: 28356350	ds	0.266763	29.5666	19.8524	1.40236e-08	3.36717	92.8302	87.4158	3.54818e-144
Layer_2-3_ExN	Piriform_2	Mdk	Lrp1	7.93567e-05	0	MDK_LRP1	Mdk - Lrp1	MK	Secreted Signaling	PMID: 28356350	ds	0.0682283	20.6718	15.562	7.78598e-11	2.99304	64.4177	52.087	4.8409e-49
Vasc_2	Piriform_2	Mdk	Lrp1	4.43919e-06	0	MDK_LRP1	Mdk - Lrp1	MK	Secreted Signaling	PMID: 28356350	ds	0.10012	10.7063	8.70479	0.0321349	2.99304	64.4177	52.087	4.8409e-49
Fibroblast	Piriform_2	Mdk	Lrp1	0.000275532	0	MDK_LRP1	Mdk - Lrp1	MK	Secreted Signaling	PMID: 28356350	ds	0.266763	29.5666	19.8524	1.40236e-08	2.99304	64.4177	52.087	4.8409e-49
Layer_2-3_ExN	Layer_6b_ExN	Mdk	Lrp1	7.78976e-05	0	MDK_LRP1	Mdk - Lrp1	MK	Secreted Signaling	PMID: 28356350	ds	0.0682283	20.6718	15.562	7.78598e-11	2.05863	76.3468	66.7246	3.96852e-16
Vasc_2	Layer_6b_ExN	Mdk	Lrp1	4.35756e-06	0	MDK_LRP1	Mdk - Lrp1	MK	Secreted Signaling	PMID: 28356350	ds	0.10012	10.7063	8.70479	0.0321349	2.05863	76.3468	66.7246	3.96852e-16
Fibroblast	Layer_6b_ExN	Mdk	Lrp1	0.000270467	0	MDK_LRP1	Mdk - Lrp1	MK	Secreted Signaling	PMID: 28356350	ds	0.266763	29.5666	19.8524	1.40236e-08	2.05863	76.3468	66.7246	3.96852e-16
Layer_2-3_ExN	Subplate	Mdk	Lrp1	7.37331e-05	0	MDK_LRP1	Mdk - Lrp1	MK	Secreted Signaling	PMID: 28356350	ds	0.0682283	20.6718	15.562	7.78598e-11	2.68069	71.7247	60.7836	9.83948e-43
Vasc_2	Subplate	Mdk	Lrp1	4.12458e-06	0	MDK_LRP1	Mdk - Lrp1	MK	Secreted Signaling	PMID: 28356350	ds	0.10012	10.7063	8.70479	0.0321349	2.68069	71.7247	60.7836	9.83948e-43
Fibroblast	Subplate	Mdk	Lrp1	0.00025601	0	MDK_LRP1	Mdk - Lrp1	MK	Secreted Signaling	PMID: 28356350	ds	0.266763	29.5666	19.8524	1.40236e-08	2.68069	71.7247	60.7836	9.83948e-43
Layer_2-3_ExN	Layer_2-4_ExN	Mdk	Lrp1	0.000112091	0	MDK_LRP1	Mdk - Lrp1	MK	Secreted Signaling	PMID: 28356350	ds	0.0682283	20.6718	15.562	7.78598e-11	2.4999	90.3149	84.7421	6.00365e-87
Vasc_2	Layer_2-4_ExN	Mdk	Lrp1	6.2705e-06	0	MDK_LRP1	Mdk - Lrp1	MK	Secreted Signaling	PMID: 28356350	ds	0.10012	10.7063	8.70479	0.0321349	2.4999	90.3149	84.7421	6.00365e-87
Fibroblast	Layer_2-4_ExN	Mdk	Lrp1	0.000389155	0	MDK_LRP1	Mdk - Lrp1	MK	Secreted Signaling	PMID: 28356350	ds	0.266763	29.5666	19.8524	1.40236e-08	2.4999	90.3149	84.7421	6.00365e-87
Layer_2-3_ExN	Layer_5-6a_ExN	Mdk	Lrp1	9.86543e-05	0	MDK_LRP1	Mdk - Lrp1	MK	Secreted Signaling	PMID: 28356350	ds	0.0682283	20.6718	15.562	7.78598e-11	1.95695	90.6568	84.4092	2.26148e-88
Vasc_2	Layer_5-6a_ExN	Mdk	Lrp1	5.51879e-06	0	MDK_LRP1	Mdk - Lrp1	MK	Secreted Signaling	PMID: 28356350	ds	0.10012	10.7063	8.70479	0.0321349	1.95695	90.6568	84.4092	2.26148e-88
Fibroblast	Layer_5-6a_ExN	Mdk	Lrp1	0.000342518	0	MDK_LRP1	Mdk - Lrp1	MK	Secreted Signaling	PMID: 28356350	ds	0.266763	29.5666	19.8524	1.40236e-08	1.95695	90.6568	84.4092	2.26148e-88
Layer_2-3_ExN	Layer_2-3_ExN	Mdk	Lrp1	0.000104046	0	MDK_LRP1	Mdk - Lrp1	MK	Secreted Signaling	PMID: 28356350	ds	0.0682283	20.6718	15.562	7.78598e-11	2.4412	96.2433	92.5072	4.02129e-136
Vasc_2	Layer_2-3_ExN	Mdk	Lrp1	5.82043e-06	0	MDK_LRP1	Mdk - Lrp1	MK	Secreted Signaling	PMID: 28356350	ds	0.10012	10.7063	8.70479	0.0321349	2.4412	96.2433	92.5072	4.02129e-136
Fibroblast	Layer_2-3_ExN	Mdk	Lrp1	0.000361233	0	MDK_LRP1	Mdk - Lrp1	MK	Secreted Signaling	PMID: 28356350	ds	0.266763	29.5666	19.8524	1.40236e-08	2.4412	96.2433	92.5072	4.02129e-136
Layer_2-3_ExN	Layer_2-5_ExN	Mdk	Lrp1	0.000114785	0	MDK_LRP1	Mdk - Lrp1	MK	Secreted Signaling	PMID: 28356350	ds	0.0682283	20.6718	15.562	7.78598e-11	2.21551	98.0494	95.6925	1.13065e-35
Vasc_2	Layer_2-5_ExN	Mdk	Lrp1	6.42127e-06	0	MDK_LRP1	Mdk - Lrp1	MK	Secreted Signaling	PMID: 28356350	ds	0.10012	10.7063	8.70479	0.0321349	2.21551	98.0494	95.6925	1.13065e-35
Fibroblast	Layer_2-5_ExN	Mdk	Lrp1	0.000398508	0	MDK_LRP1	Mdk - Lrp1	MK	Secreted Signaling	PMID: 28356350	ds	0.266763	29.5666	19.8524	1.40236e-08	2.21551	98.0494	95.6925	1.13065e-35
Layer_2-3_ExN	Vasc_2	Mdk	Lrp1	3.20637e-05	0	MDK_LRP1	Mdk - Lrp1	MK	Secreted Signaling	PMID: 28356350	ds	0.0682283	20.6718	15.562	7.78598e-11	1.76328	49.4395	39.9075	7.76981e-16
Vasc_2	Vasc_2	Mdk	Lrp1	1.79355e-06	0.01	MDK_LRP1	Mdk - Lrp1	MK	Secreted Signaling	PMID: 28356350	ds	0.10012	10.7063	8.70479	0.0321349	1.76328	49.4395	39.9075	7.76981e-16
Fibroblast	Vasc_2	Mdk	Lrp1	0.00011134	0	MDK_LRP1	Mdk - Lrp1	MK	Secreted Signaling	PMID: 28356350	ds	0.266763	29.5666	19.8524	1.40236e-08	1.76328	49.4395	39.9075	7.76981e-16
Layer_2-3_ExN	Microglia_2	Mdk	Lrp1	0.000187103	0	MDK_LRP1	Mdk - Lrp1	MK	Secreted Signaling	PMID: 28356350	ds	0.0682283	20.6718	15.562	7.78598e-11	NA	NA	NA	NA
Vasc_2	Microglia_2	Mdk	Lrp1	1.04675e-05	0	MDK_LRP1	Mdk - Lrp1	MK	Secreted Signaling	PMID: 28356350	ds	0.10012	10.7063	8.70479	0.0321349	NA	NA	NA	NA
Fibroblast	Microglia_2	Mdk	Lrp1	0.00064946	0	MDK_LRP1	Mdk - Lrp1	MK	Secreted Signaling	PMID: 28356350	ds	0.266763	29.5666	19.8524	1.40236e-08	NA	NA	NA	NA
Layer_2-3_ExN	Astrocyte_1	Mdk	Lrp1	7.51648e-05	0	MDK_LRP1	Mdk - Lrp1	MK	Secreted Signaling	PMID: 28356350	ds	0.0682283	20.6718	15.562	7.78598e-11	1.37323	77.2124	75.5169	5.72763e-07
Vasc_2	Astrocyte_1	Mdk	Lrp1	4.20468e-06	0	MDK_LRP1	Mdk - Lrp1	MK	Secreted Signaling	PMID: 28356350	ds	0.10012	10.7063	8.70479	0.0321349	1.37323	77.2124	75.5169	5.72763e-07
Fibroblast	Astrocyte_1	Mdk	Lrp1	0.00026098	0	MDK_LRP1	Mdk - Lrp1	MK	Secreted Signaling	PMID: 28356350	ds	0.266763	29.5666	19.8524	1.40236e-08	1.37323	77.2124	75.5169	5.72763e-07
Layer_2-3_ExN	Fibroblast	Mdk	Lrp1	0.000152652	0	MDK_LRP1	Mdk - Lrp1	MK	Secreted Signaling	PMID: 28356350	ds	0.0682283	20.6718	15.562	7.78598e-11	6.65917	84.6749	66.5325	3.76326e-55
Vasc_2	Fibroblast	Mdk	Lrp1	8.53992e-06	0	MDK_LRP1	Mdk - Lrp1	MK	Secreted Signaling	PMID: 28356350	ds	0.10012	10.7063	8.70479	0.0321349	6.65917	84.6749	66.5325	3.76326e-55
Fibroblast	Fibroblast	Mdk	Lrp1	0.000529924	0	MDK_LRP1	Mdk - Lrp1	MK	Secreted Signaling	PMID: 28356350	ds	0.266763	29.5666	19.8524	1.40236e-08	6.65917	84.6749	66.5325	3.76326e-55
Layer_2-3_ExN	Astrocyte_2	Mdk	Lrp1	7.68693e-05	0	MDK_LRP1	Mdk - Lrp1	MK	Secreted Signaling	PMID: 28356350	ds	0.0682283	20.6718	15.562	7.78598e-11	1.39185	86.5546	78.9744	0.0482404
Vasc_2	Astrocyte_2	Mdk	Lrp1	4.30003e-06	0	MDK_LRP1	Mdk - Lrp1	MK	Secreted Signaling	PMID: 28356350	ds	0.10012	10.7063	8.70479	0.0321349	1.39185	86.5546	78.9744	0.0482404
Fibroblast	Astrocyte_2	Mdk	Lrp1	0.000266897	0	MDK_LRP1	Mdk - Lrp1	MK	Secreted Signaling	PMID: 28356350	ds	0.266763	29.5666	19.8524	1.40236e-08	1.39185	86.5546	78.9744	0.0482404
Layer_2-3_ExN	OPC_1	Mdk	Lrp1	0.00012356	0	MDK_LRP1	Mdk - Lrp1	MK	Secreted Signaling	PMID: 28356350	ds	0.0682283	20.6718	15.562	7.78598e-11	3.32904	87.6543	84.3997	4.54329e-15
Vasc_2	OPC_1	Mdk	Lrp1	6.91222e-06	0	MDK_LRP1	Mdk - Lrp1	MK	Secreted Signaling	PMID: 28356350	ds	0.10012	10.7063	8.70479	0.0321349	3.32904	87.6543	84.3997	4.54329e-15
Fibroblast	OPC_1	Mdk	Lrp1	0.000428964	0	MDK_LRP1	Mdk - Lrp1	MK	Secreted Signaling	PMID: 28356350	ds	0.266763	29.5666	19.8524	1.40236e-08	3.32904	87.6543	84.3997	4.54329e-15
Layer_2-3_ExN	Vasc_1	Mdk	Lrp1	8.30998e-05	0	MDK_LRP1	Mdk - Lrp1	MK	Secreted Signaling	PMID: 28356350	ds	0.0682283	20.6718	15.562	7.78598e-11	3.10568	80.4545	70.3333	4.96774e-06
Vasc_2	Vasc_1	Mdk	Lrp1	4.64859e-06	0	MDK_LRP1	Mdk - Lrp1	MK	Secreted Signaling	PMID: 28356350	ds	0.10012	10.7063	8.70479	0.0321349	3.10568	80.4545	70.3333	4.96774e-06
Fibroblast	Vasc_1	Mdk	Lrp1	0.000288526	0	MDK_LRP1	Mdk - Lrp1	MK	Secreted Signaling	PMID: 28356350	ds	0.266763	29.5666	19.8524	1.40236e-08	3.10568	80.4545	70.3333	4.96774e-06

## Sheet: P0_Cortex_Downregulated_in_DS
source	target	ligand	receptor	prob	pval	interaction_name	interaction_name_2	pathway_name	annotation	evidence	datasets	ligand.logFC	ligand.pct.1	ligand.pct.2	ligand.pvalues	receptor.logFC	receptor.pct.1	receptor.pct.2	receptor.pvalues
Astrocyte_1	Vasc_2	Wnt7a	FZD4_LRP5	1.1722e-05	0	WNT7A_FZD4_LRP5	Wnt7a - (Fzd4+Lrp5)	WNT	Secreted Signaling	KEGG: mmu04310; PMID: 23209147	ctl	-0.236396	27.8761	33.4586	0.000373846	0.55624	34.361	28.3431	1.02759e-05
Astrocyte_2	Vasc_2	Wnt7a	FZD4_LRP5	1.09875e-05	0	WNT7A_FZD4_LRP5	Wnt7a - (Fzd4+Lrp5)	WNT	Secreted Signaling	KEGG: mmu04310; PMID: 23209147	ctl	-0.637585	24.3697	33.3333	0.0308306	0.55624	34.361	28.3431	1.02759e-05
Astrocyte_1	Fibroblast	Wnt7a	FZD7_LRP5	7.77368e-06	0	WNT7A_FZD7_LRP5	Wnt7a - (Fzd7+Lrp5)	WNT	Secreted Signaling	KEGG: mmu04310; PMID: 23209147	ctl	-0.236396	27.8761	33.4586	0.000373846	1.31016	44.0789	24.0107	1.03386e-30
Astrocyte_2	Fibroblast	Wnt7a	FZD7_LRP5	7.28659e-06	0	WNT7A_FZD7_LRP5	Wnt7a - (Fzd7+Lrp5)	WNT	Secreted Signaling	KEGG: mmu04310; PMID: 23209147	ctl	-0.637585	24.3697	33.3333	0.0308306	1.31016	44.0789	24.0107	1.03386e-30
Astrocyte_1	Microglia_2	Wnt7a	FZD7_LRP5	1.92554e-05	0	WNT7A_FZD7_LRP5	Wnt7a - (Fzd7+Lrp5)	WNT	Secreted Signaling	KEGG: mmu04310; PMID: 23209147	ctl	-0.236396	27.8761	33.4586	0.000373846	NA	NA	NA	NA
Astrocyte_1	Astrocyte_2	Wnt7a	FZD8_LRP5	4.87799e-06	0	WNT7A_FZD8_LRP5	Wnt7a - (Fzd8+Lrp5)	WNT	Secreted Signaling	KEGG: mmu04310; PMID: 23209147	ctl	-0.236396	27.8761	33.4586	0.000373846	NA	NA	NA	NA
Astrocyte_2	Astrocyte_2	Wnt7a	FZD8_LRP5	4.57234e-06	0	WNT7A_FZD8_LRP5	Wnt7a - (Fzd8+Lrp5)	WNT	Secreted Signaling	KEGG: mmu04310; PMID: 23209147	ctl	-0.637585	24.3697	33.3333	0.0308306	NA	NA	NA	NA
Astrocyte_1	Microglia_2	Wnt7a	FZD8_LRP5	1.05086e-05	0	WNT7A_FZD8_LRP5	Wnt7a - (Fzd8+Lrp5)	WNT	Secreted Signaling	KEGG: mmu04310; PMID: 23209147	ctl	-0.236396	27.8761	33.4586	0.000373846	NA	NA	NA	NA
Astrocyte_1	Vasc_2	Wnt7a	FZD4_LRP6	6.12617e-06	0	WNT7A_FZD4_LRP6	Wnt7a - (Fzd4+Lrp6)	WNT	Secreted Signaling	KEGG: mmu04310; PMID: 23209147	ctl	-0.236396	27.8761	33.4586	0.000373846	0.324116	21.5807	16.7368	2.05438e-05
Astrocyte_2	Vasc_2	Wnt7a	FZD4_LRP6	5.74231e-06	0	WNT7A_FZD4_LRP6	Wnt7a - (Fzd4+Lrp6)	WNT	Secreted Signaling	KEGG: mmu04310; PMID: 23209147	ctl	-0.637585	24.3697	33.3333	0.0308306	0.324116	21.5807	16.7368	2.05438e-05
Astrocyte_1	Fibroblast	Wnt7a	FZD7_LRP6	5.19002e-06	0	WNT7A_FZD7_LRP6	Wnt7a - (Fzd7+Lrp6)	WNT	Secreted Signaling	KEGG: mmu04310; PMID: 23209147	ctl	-0.236396	27.8761	33.4586	0.000373846	0.934929	32.5851	14.554	2.06772e-30
Astrocyte_2	Fibroblast	Wnt7a	FZD7_LRP6	4.86482e-06	0	WNT7A_FZD7_LRP6	Wnt7a - (Fzd7+Lrp6)	WNT	Secreted Signaling	KEGG: mmu04310; PMID: 23209147	ctl	-0.637585	24.3697	33.3333	0.0308306	0.934929	32.5851	14.554	2.06772e-30
Astrocyte_1	Microglia_2	Wnt7a	FZD7_LRP6	1.42785e-05	0	WNT7A_FZD7_LRP6	Wnt7a - (Fzd7+Lrp6)	WNT	Secreted Signaling	KEGG: mmu04310; PMID: 23209147	ctl	-0.236396	27.8761	33.4586	0.000373846	NA	NA	NA	NA
Astrocyte_1	Astrocyte_2	Wnt7a	FZD8_LRP6	3.60422e-06	0	WNT7A_FZD8_LRP6	Wnt7a - (Fzd8+Lrp6)	WNT	Secreted Signaling	KEGG: mmu04310; PMID: 23209147	ctl	-0.236396	27.8761	33.4586	0.000373846	NA	NA	NA	NA
Astrocyte_2	Astrocyte_2	Wnt7a	FZD8_LRP6	3.37839e-06	0	WNT7A_FZD8_LRP6	Wnt7a - (Fzd8+Lrp6)	WNT	Secreted Signaling	KEGG: mmu04310; PMID: 23209147	ctl	-0.637585	24.3697	33.3333	0.0308306	NA	NA	NA	NA
Astrocyte_1	Microglia_2	Wnt7a	FZD8_LRP6	7.7925e-06	0	WNT7A_FZD8_LRP6	Wnt7a - (Fzd8+Lrp6)	WNT	Secreted Signaling	KEGG: mmu04310; PMID: 23209147	ctl	-0.236396	27.8761	33.4586	0.000373846	NA	NA	NA	NA
Layer_2-5_ExN	Astrocyte_2	Cxcl12	Cxcr4	5.97178e-08	0	CXCL12_CXCR4	Cxcl12 - Cxcr4	CXCL	Secreted Signaling	KEGG: mmu04060	ctl	-0.143892	5.52666	11.5794	1.57833e-10	NA	NA	NA	NA
Vasc_2	Astrocyte_2	Cxcl12	Cxcr4	7.73692e-08	0	CXCL12_CXCR4	Cxcl12 - Cxcr4	CXCL	Secreted Signaling	KEGG: mmu04060	ctl	-0.327713	7.73543	11.8587	7.26607e-06	NA	NA	NA	NA
Fibroblast	Astrocyte_2	Cxcl12	Cxcr4	2.42449e-06	0	CXCL12_CXCR4	Cxcl12 - Cxcr4	CXCL	Secreted Signaling	KEGG: mmu04060	ctl	-1.10655	23.1424	28.1019	8.25993e-05	NA	NA	NA	NA
Subplate	Microglia_1	Cx3cl1	Cx3cr1	2.85475e-05	0	CX3CL1_CX3CR1	Cx3cl1 - Cx3cr1	CX3C	Secreted Signaling	KEGG: mmu04060	ctl	-0.149696	16.0862	18.0239	0.0359921	NA	NA	NA	NA
Astrocyte_1	Piriform_2	Mdk	Lrp1	4.18942e-05	0	MDK_LRP1	Mdk - Lrp1	MK	Secreted Signaling	PMID: 28356350	ctl	-0.124267	17.8466	21.1936	0.0116527	2.99304	64.4177	52.087	4.8409e-49
Astrocyte_1	InN_3	Mdk	Lrp1	4.84475e-05	0	MDK_LRP1	Mdk - Lrp1	MK	Secreted Signaling	PMID: 28356350	ctl	-0.124267	17.8466	21.1936	0.0116527	1.8643	73.2069	68.4262	1.08708e-57
Astrocyte_1	Piriform_1	Mdk	Lrp1	6.31659e-05	0	MDK_LRP1	Mdk - Lrp1	MK	Secreted Signaling	PMID: 28356350	ctl	-0.124267	17.8466	21.1936	0.0116527	3.36717	92.8302	87.4158	3.54818e-144
Astrocyte_1	InN_1	Mdk	Lrp1	9.88108e-06	0	MDK_LRP1	Mdk - Lrp1	MK	Secreted Signaling	PMID: 28356350	ctl	-0.124267	17.8466	21.1936	0.0116527	NA	NA	NA	NA
Astrocyte_1	Layer_2-4_ExN	Mdk	Lrp1	7.09581e-05	0	MDK_LRP1	Mdk - Lrp1	MK	Secreted Signaling	PMID: 28356350	ctl	-0.124267	17.8466	21.1936	0.0116527	2.4999	90.3149	84.7421	6.00365e-87
Astrocyte_1	Subplate	Mdk	Lrp1	3.86782e-05	0	MDK_LRP1	Mdk - Lrp1	MK	Secreted Signaling	PMID: 28356350	ctl	-0.124267	17.8466	21.1936	0.0116527	2.68069	71.7247	60.7836	9.83948e-43
Astrocyte_1	Layer_6b_ExN	Mdk	Lrp1	4.73231e-05	0	MDK_LRP1	Mdk - Lrp1	MK	Secreted Signaling	PMID: 28356350	ctl	-0.124267	17.8466	21.1936	0.0116527	2.05863	76.3468	66.7246	3.96852e-16
Astrocyte_1	Layer_5-6a_ExN	Mdk	Lrp1	6.49307e-05	0	MDK_LRP1	Mdk - Lrp1	MK	Secreted Signaling	PMID: 28356350	ctl	-0.124267	17.8466	21.1936	0.0116527	1.95695	90.6568	84.4092	2.26148e-88
Astrocyte_1	Layer_2-5_ExN	Mdk	Lrp1	7.81748e-05	0	MDK_LRP1	Mdk - Lrp1	MK	Secreted Signaling	PMID: 28356350	ctl	-0.124267	17.8466	21.1936	0.0116527	2.21551	98.0494	95.6925	1.13065e-35
Astrocyte_1	Layer_2-3_ExN	Mdk	Lrp1	6.75833e-05	0	MDK_LRP1	Mdk - Lrp1	MK	Secreted Signaling	PMID: 28356350	ctl	-0.124267	17.8466	21.1936	0.0116527	2.4412	96.2433	92.5072	4.02129e-136
Astrocyte_1	Vasc_2	Mdk	Lrp1	1.47431e-05	0	MDK_LRP1	Mdk - Lrp1	MK	Secreted Signaling	PMID: 28356350	ctl	-0.124267	17.8466	21.1936	0.0116527	1.76328	49.4395	39.9075	7.76981e-16
Astrocyte_1	Astrocyte_1	Mdk	Lrp1	5.31469e-05	0	MDK_LRP1	Mdk - Lrp1	MK	Secreted Signaling	PMID: 28356350	ctl	-0.124267	17.8466	21.1936	0.0116527	1.37323	77.2124	75.5169	5.72763e-07
Astrocyte_1	Microglia_1	Mdk	Lrp1	7.51597e-05	0	MDK_LRP1	Mdk - Lrp1	MK	Secreted Signaling	PMID: 28356350	ctl	-0.124267	17.8466	21.1936	0.0116527	6.69821	100	82.716	0.000424957
Astrocyte_1	OPC_1	Mdk	Lrp1	7.70843e-05	0	MDK_LRP1	Mdk - Lrp1	MK	Secreted Signaling	PMID: 28356350	ctl	-0.124267	17.8466	21.1936	0.0116527	3.32904	87.6543	84.3997	4.54329e-15
Astrocyte_1	Vasc_1	Mdk	Lrp1	4.46819e-05	0	MDK_LRP1	Mdk - Lrp1	MK	Secreted Signaling	PMID: 28356350	ctl	-0.124267	17.8466	21.1936	0.0116527	3.10568	80.4545	70.3333	4.96774e-06
Astrocyte_1	Fibroblast	Mdk	Lrp1	6.75325e-05	0	MDK_LRP1	Mdk - Lrp1	MK	Secreted Signaling	PMID: 28356350	ctl	-0.124267	17.8466	21.1936	0.0116527	6.65917	84.6749	66.5325	3.76326e-55
Astrocyte_1	Astrocyte_2	Mdk	Lrp1	5.34891e-05	0	MDK_LRP1	Mdk - Lrp1	MK	Secreted Signaling	PMID: 28356350	ctl	-0.124267	17.8466	21.1936	0.0116527	1.39185	86.5546	78.9744	0.0482404
Astrocyte_1	Microglia_2	Mdk	Lrp1	0.000119791	0	MDK_LRP1	Mdk - Lrp1	MK	Secreted Signaling	PMID: 28356350	ctl	-0.124267	17.8466	21.1936	0.0116527	NA	NA	NA	NA

## Sheet: 6mo_SVZ_Downregulated_in_DS
source	target	ligand	receptor	prob	pval	interaction_name	interaction_name_2	pathway_name	annotation	evidence	datasets	ligand.logFC	ligand.pct.1	ligand.pct.2	ligand.pvalues	receptor.logFC	receptor.pct.1	receptor.pct.2	receptor.pvalues
Astrocyte_2	Microglia_2	Cx3cl1	Cx3cr1	6.08354e-05	0	CX3CL1_CX3CR1	Cx3cl1 - Cx3cr1	CX3C	Secreted Signaling	KEGG: mmu04060	ctl	-0.986445	6.66667	12.4294	0.033864	-6.3938	52.381	90.4762	0.00520881
NSC	InN_3	Mdk	Lrp1	0.000410607	0	MDK_LRP1	Mdk - Lrp1	MK	Secreted Signaling	PMID: 28356350	ctl	-0.684155	18.7135	32.0197	0.00884573	NA	NA	NA	NA
Astrocyte_3	InN_3	Mdk	Lrp1	0.000352098	0	MDK_LRP1	Mdk - Lrp1	MK	Secreted Signaling	PMID: 28356350	ctl	-0.808164	16.7421	28.4153	0.00573035	NA	NA	NA	NA
NSC	NSC	Mdk	Lrp1	0.00031189	0	MDK_LRP1	Mdk - Lrp1	MK	Secreted Signaling	PMID: 28356350	ctl	-0.684155	18.7135	32.0197	0.00884573	NA	NA	NA	NA
Astrocyte_3	NSC	Mdk	Lrp1	0.000267444	0	MDK_LRP1	Mdk - Lrp1	MK	Secreted Signaling	PMID: 28356350	ctl	-0.808164	16.7421	28.4153	0.00573035	NA	NA	NA	NA

## Sheet: 6mo_Cortex_Upregulated_in_DS
source	target	ligand	receptor	prob	pval	interaction_name	interaction_name_2	pathway_name	annotation	evidence	datasets	ligand.logFC	ligand.pct.1	ligand.pct.2	ligand.pvalues	receptor.logFC	receptor.pct.1	receptor.pct.2	receptor.pvalues
OPC_1	Vasc_2	Wnt7a	FZD4_LRP5	2.687e-06	0	WNT7A_FZD4_LRP5	Wnt7a - (Fzd4+Lrp5)	WNT	Secreted Signaling	KEGG: mmu04310; PMID: 23209147	ds	0.290626	19.8596	15.6317	0.00945089	NA	NA	NA	NA
OPC_1	Fibroblast_1	Wnt7a	FZD4_LRP5	2.68754e-06	0	WNT7A_FZD4_LRP5	Wnt7a - (Fzd4+Lrp5)	WNT	Secreted Signaling	KEGG: mmu04310; PMID: 23209147	ds	0.290626	19.8596	15.6317	0.00945089	NA	NA	NA	NA
OPC_1	Fibroblast_1	Wnt7a	FZD7_LRP5	7.31586e-06	0	WNT7A_FZD7_LRP5	Wnt7a - (Fzd7+Lrp5)	WNT	Secreted Signaling	KEGG: mmu04310; PMID: 23209147	ds	0.290626	19.8596	15.6317	0.00945089	NA	NA	NA	NA
OPC_1	Vasc_2	Wnt7a	FZD4_LRP6	2.90711e-06	0	WNT7A_FZD4_LRP6	Wnt7a - (Fzd4+Lrp6)	WNT	Secreted Signaling	KEGG: mmu04310; PMID: 23209147	ds	0.290626	19.8596	15.6317	0.00945089	NA	NA	NA	NA
OPC_1	Fibroblast_1	Wnt7a	FZD4_LRP6	3.511e-06	0	WNT7A_FZD4_LRP6	Wnt7a - (Fzd4+Lrp6)	WNT	Secreted Signaling	KEGG: mmu04310; PMID: 23209147	ds	0.290626	19.8596	15.6317	0.00945089	-1.31085	38.1481	47.9275	0.00983461
OPC_1	Fibroblast_1	Wnt7a	FZD7_LRP6	9.55742e-06	0	WNT7A_FZD7_LRP6	Wnt7a - (Fzd7+Lrp6)	WNT	Secreted Signaling	KEGG: mmu04310; PMID: 23209147	ds	0.290626	19.8596	15.6317	0.00945089	-1.31085	38.1481	47.9275	0.00983461
Astrocyte_2	Vasc_2	Vegfa	Flt1	0.000341295	0	VEGFA_VEGFR1	Vegfa - Vegfr1	VEGF	Secreted Signaling	KEGG: mmu04370; PMID: 16633338	ds	1.41827	31.6844	24.9289	1.63162e-31	1.3866	83.4356	81.664	0.000812879
Astrocyte_1	Vasc_2	Vegfa	Flt1	2.53784e-05	0	VEGFA_VEGFR1	Vegfa - Vegfr1	VEGF	Secreted Signaling	KEGG: mmu04370; PMID: 16633338	ds	0.3649	12.8073	10.2476	0.0083589	1.3866	83.4356	81.664	0.000812879
InN_3	Vasc_2	Vegfa	Flt1	2.17766e-05	0	VEGFA_VEGFR1	Vegfa - Vegfr1	VEGF	Secreted Signaling	KEGG: mmu04370; PMID: 16633338	ds	0.145577	13.6053	11.8582	0.00883719	1.3866	83.4356	81.664	0.000812879
Layer_2-6a_ExN	Vasc_2	Vegfa	Flt1	0.000177247	0	VEGFA_VEGFR1	Vegfa - Vegfr1	VEGF	Secreted Signaling	KEGG: mmu04370; PMID: 16633338	ds	0.617387	29.6629	23.9631	0.00918473	1.3866	83.4356	81.664	0.000812879
Layer_1-6a_ExN	Vasc_2	Vegfa	Flt1	3.03676e-06	0	VEGFA_VEGFR1	Vegfa - Vegfr1	VEGF	Secreted Signaling	KEGG: mmu04370; PMID: 16633338	ds	0.107815	10.5808	9.00412	0.0164195	1.3866	83.4356	81.664	0.000812879
Layer_6b_ExN	Vasc_2	Vegfa	Flt1	4.94303e-05	0	VEGFA_VEGFR1	Vegfa - Vegfr1	VEGF	Secreted Signaling	KEGG: mmu04370; PMID: 16633338	ds	0.43075	17.1375	11.9857	0.014826	1.3866	83.4356	81.664	0.000812879
OL	Layer_4-6a_ExN	Ccl8	Ccr2	3.64153e-09	0	CCL8_CCR2	Ccl8 - Ccr2	CCL	Secreted Signaling	KEGG: mmu04060	ds	0.261797	14.5293	10.411	0.0022121	0.104692	10.0678	8.30479	0.0298534
Layer_4-6a_ExN	Layer_4-6a_ExN	Ccl8	Ccr2	1.374e-08	0	CCL8_CCR2	Ccl8 - Ccr2	CCL	Secreted Signaling	KEGG: mmu04060	ds	0.376785	22.8475	18.3219	5.77301e-05	0.104692	10.0678	8.30479	0.0298534
Layer_1_ExN	Layer_4-6a_ExN	Ccl8	Ccr2	8.30906e-09	0	CCL8_CCR2	Ccl8 - Ccr2	CCL	Secreted Signaling	KEGG: mmu04060	ds	0.192274	18.9726	16.1264	0.00571107	0.104692	10.0678	8.30479	0.0298534
Layer_2-3_ExN	Layer_4-6a_ExN	Ccl8	Ccr2	1.57166e-08	0	CCL8_CCR2	Ccl8 - Ccr2	CCL	Secreted Signaling	KEGG: mmu04060	ds	0.362032	24.6199	20.2911	0.0059442	0.104692	10.0678	8.30479	0.0298534
Layer_5-6a_ExN	Layer_4-6a_ExN	Ccl8	Ccr2	8.49257e-09	0	CCL8_CCR2	Ccl8 - Ccr2	CCL	Secreted Signaling	KEGG: mmu04060	ds	0.289277	19.2967	15.8451	0.00456459	0.104692	10.0678	8.30479	0.0298534
OL	Subplate	Ccl8	Ccr2	7.92293e-08	0	CCL8_CCR2	Ccl8 - Ccr2	CCL	Secreted Signaling	KEGG: mmu04060	ds	0.261797	14.5293	10.411	0.0022121	0.325839	11.3412	6.46766	0.000327781
Layer_4-6a_ExN	Subplate	Ccl8	Ccr2	2.98942e-07	0	CCL8_CCR2	Ccl8 - Ccr2	CCL	Secreted Signaling	KEGG: mmu04060	ds	0.376785	22.8475	18.3219	5.77301e-05	0.325839	11.3412	6.46766	0.000327781
Layer_1_ExN	Subplate	Ccl8	Ccr2	1.80781e-07	0	CCL8_CCR2	Ccl8 - Ccr2	CCL	Secreted Signaling	KEGG: mmu04060	ds	0.192274	18.9726	16.1264	0.00571107	0.325839	11.3412	6.46766	0.000327781
Layer_2-3_ExN	Subplate	Ccl8	Ccr2	3.41948e-07	0	CCL8_CCR2	Ccl8 - Ccr2	CCL	Secreted Signaling	KEGG: mmu04060	ds	0.362032	24.6199	20.2911	0.0059442	0.325839	11.3412	6.46766	0.000327781
Layer_5-6a_ExN	Subplate	Ccl8	Ccr2	1.84774e-07	0	CCL8_CCR2	Ccl8 - Ccr2	CCL	Secreted Signaling	KEGG: mmu04060	ds	0.289277	19.2967	15.8451	0.00456459	0.325839	11.3412	6.46766	0.000327781
OL	Layer_2-3_ExN	Ccl8	Ccr2	5.66765e-08	0	CCL8_CCR2	Ccl8 - Ccr2	CCL	Secreted Signaling	KEGG: mmu04060	ds	0.261797	14.5293	10.411	0.0022121	0.263175	10.9942	7.10616	0.0003754
Layer_4-6a_ExN	Layer_2-3_ExN	Ccl8	Ccr2	2.13848e-07	0	CCL8_CCR2	Ccl8 - Ccr2	CCL	Secreted Signaling	KEGG: mmu04060	ds	0.376785	22.8475	18.3219	5.77301e-05	0.263175	10.9942	7.10616	0.0003754
Layer_1_ExN	Layer_2-3_ExN	Ccl8	Ccr2	1.29321e-07	0	CCL8_CCR2	Ccl8 - Ccr2	CCL	Secreted Signaling	KEGG: mmu04060	ds	0.192274	18.9726	16.1264	0.00571107	0.263175	10.9942	7.10616	0.0003754
Layer_2-3_ExN	Layer_2-3_ExN	Ccl8	Ccr2	2.44611e-07	0	CCL8_CCR2	Ccl8 - Ccr2	CCL	Secreted Signaling	KEGG: mmu04060	ds	0.362032	24.6199	20.2911	0.0059442	0.263175	10.9942	7.10616	0.0003754
Layer_5-6a_ExN	Layer_2-3_ExN	Ccl8	Ccr2	1.32178e-07	0	CCL8_CCR2	Ccl8 - Ccr2	CCL	Secreted Signaling	KEGG: mmu04060	ds	0.289277	19.2967	15.8451	0.00456459	0.263175	10.9942	7.10616	0.0003754
InN_1	Myeloid	Cx3cl1	Cx3cr1	1.00612e-06	0	CX3CL1_CX3CR1	Cx3cl1 - Cx3cr1	CX3C	Secreted Signaling	KEGG: mmu04060	ds	0.262558	12.3251	10.7009	0.0438564	NA	NA	NA	NA
InN_3	Myeloid	Cx3cl1	Cx3cr1	3.09471e-05	0	CX3CL1_CX3CR1	Cx3cl1 - Cx3cr1	CX3C	Secreted Signaling	KEGG: mmu04060	ds	2.12596	52.8738	39.6743	2.06385e-36	NA	NA	NA	NA
Layer_2-6a_ExN	Myeloid	Cx3cl1	Cx3cr1	0.000136518	0	CX3CL1_CX3CR1	Cx3cl1 - Cx3cr1	CX3C	Secreted Signaling	KEGG: mmu04060	ds	3.30954	91.4607	90.6298	0.00376274	NA	NA	NA	NA
OPC_1	Myeloid	Cx3cl1	Cx3cr1	1.44604e-05	0	CX3CL1_CX3CR1	Cx3cl1 - Cx3cr1	CX3C	Secreted Signaling	KEGG: mmu04060	ds	0.716912	41.4243	32.6909	0.000140574	NA	NA	NA	NA
Layer_1-6a_ExN	Myeloid	Cx3cl1	Cx3cr1	6.1833e-05	0	CX3CL1_CX3CR1	Cx3cl1 - Cx3cr1	CX3C	Secreted Signaling	KEGG: mmu04060	ds	1.27911	77.7273	73.3782	1.93473e-06	NA	NA	NA	NA
Piriform_2	Myeloid	Cx3cl1	Cx3cr1	0.000134993	0	CX3CL1_CX3CR1	Cx3cl1 - Cx3cr1	CX3C	Secreted Signaling	KEGG: mmu04060	ds	1.69908	93.3374	91.6279	0.00867962	NA	NA	NA	NA
InN_4	Myeloid	Cx3cl1	Cx3cr1	2.52809e-05	0	CX3CL1_CX3CR1	Cx3cl1 - Cx3cr1	CX3C	Secreted Signaling	KEGG: mmu04060	ds	1.43693	44.5274	37.4269	0.018909	NA	NA	NA	NA
InN_1	Microglia_1	Cx3cl1	Cx3cr1	3.2243e-06	0	CX3CL1_CX3CR1	Cx3cl1 - Cx3cr1	CX3C	Secreted Signaling	KEGG: mmu04060	ds	0.262558	12.3251	10.7009	0.0438564	NA	NA	NA	NA
InN_3	Microglia_1	Cx3cl1	Cx3cr1	9.9169e-05	0	CX3CL1_CX3CR1	Cx3cl1 - Cx3cr1	CX3C	Secreted Signaling	KEGG: mmu04060	ds	2.12596	52.8738	39.6743	2.06385e-36	NA	NA	NA	NA
Layer_2-6a_ExN	Microglia_1	Cx3cl1	Cx3cr1	0.000437365	0	CX3CL1_CX3CR1	Cx3cl1 - Cx3cr1	CX3C	Secreted Signaling	KEGG: mmu04060	ds	3.30954	91.4607	90.6298	0.00376274	NA	NA	NA	NA
OPC_1	Microglia_1	Cx3cl1	Cx3cr1	4.63396e-05	0	CX3CL1_CX3CR1	Cx3cl1 - Cx3cr1	CX3C	Secreted Signaling	KEGG: mmu04060	ds	0.716912	41.4243	32.6909	0.000140574	NA	NA	NA	NA
Layer_1-6a_ExN	Microglia_1	Cx3cl1	Cx3cr1	0.000198128	0	CX3CL1_CX3CR1	Cx3cl1 - Cx3cr1	CX3C	Secreted Signaling	KEGG: mmu04060	ds	1.27911	77.7273	73.3782	1.93473e-06	NA	NA	NA	NA
Piriform_2	Microglia_1	Cx3cl1	Cx3cr1	0.000432482	0	CX3CL1_CX3CR1	Cx3cl1 - Cx3cr1	CX3C	Secreted Signaling	KEGG: mmu04060	ds	1.69908	93.3374	91.6279	0.00867962	NA	NA	NA	NA
InN_4	Microglia_1	Cx3cl1	Cx3cr1	8.1013e-05	0	CX3CL1_CX3CR1	Cx3cl1 - Cx3cr1	CX3C	Secreted Signaling	KEGG: mmu04060	ds	1.43693	44.5274	37.4269	0.018909	NA	NA	NA	NA
InN_1	Microglia_2	Cx3cl1	Cx3cr1	2.1972e-05	0	CX3CL1_CX3CR1	Cx3cl1 - Cx3cr1	CX3C	Secreted Signaling	KEGG: mmu04060	ds	0.262558	12.3251	10.7009	0.0438564	-2.06217	85.6838	85.5292	0.0439012
InN_3	Microglia_2	Cx3cl1	Cx3cr1	0.000675411	0	CX3CL1_CX3CR1	Cx3cl1 - Cx3cr1	CX3C	Secreted Signaling	KEGG: mmu04060	ds	2.12596	52.8738	39.6743	2.06385e-36	-2.06217	85.6838	85.5292	0.0439012
Layer_2-6a_ExN	Microglia_2	Cx3cl1	Cx3cr1	0.00297292	0	CX3CL1_CX3CR1	Cx3cl1 - Cx3cr1	CX3C	Secreted Signaling	KEGG: mmu04060	ds	3.30954	91.4607	90.6298	0.00376274	-2.06217	85.6838	85.5292	0.0439012
OPC_1	Microglia_2	Cx3cl1	Cx3cr1	0.000315702	0	CX3CL1_CX3CR1	Cx3cl1 - Cx3cr1	CX3C	Secreted Signaling	KEGG: mmu04060	ds	0.716912	41.4243	32.6909	0.000140574	-2.06217	85.6838	85.5292	0.0439012
Layer_1-6a_ExN	Microglia_2	Cx3cl1	Cx3cr1	0.00134862	0	CX3CL1_CX3CR1	Cx3cl1 - Cx3cr1	CX3C	Secreted Signaling	KEGG: mmu04060	ds	1.27911	77.7273	73.3782	1.93473e-06	-2.06217	85.6838	85.5292	0.0439012
Piriform_2	Microglia_2	Cx3cl1	Cx3cr1	0.00293981	0	CX3CL1_CX3CR1	Cx3cl1 - Cx3cr1	CX3C	Secreted Signaling	KEGG: mmu04060	ds	1.69908	93.3374	91.6279	0.00867962	-2.06217	85.6838	85.5292	0.0439012
InN_4	Microglia_2	Cx3cl1	Cx3cr1	0.000551814	0	CX3CL1_CX3CR1	Cx3cl1 - Cx3cr1	CX3C	Secreted Signaling	KEGG: mmu04060	ds	1.43693	44.5274	37.4269	0.018909	-2.06217	85.6838	85.5292	0.0439012

## Sheet: 6mo_Cortex_Downregulated_in_DS
source	target	ligand	receptor	prob	pval	interaction_name	interaction_name_2	pathway_name	annotation	evidence	datasets	ligand.logFC	ligand.pct.1	ligand.pct.2	ligand.pvalues	receptor.logFC	receptor.pct.1	receptor.pct.2	receptor.pvalues
Astrocyte_2	Vasc_2	Wnt7b	FZD4_LRP5	1.4964e-06	0	WNT7B_FZD4_LRP5	Wnt7b - (Fzd4+Lrp5)	WNT	Secreted Signaling	KEGG: mmu04310; PMID: 23209147	ctl	-0.235807	10.674	12.4907	7.78488e-06	NA	NA	NA	NA
Layer_5-6a_ExN	Vasc_2	Wnt7b	FZD4_LRP5	4.91784e-07	0	WNT7B_FZD4_LRP5	Wnt7b - (Fzd4+Lrp5)	WNT	Secreted Signaling	KEGG: mmu04310; PMID: 23209147	ctl	-0.368472	5.50045	10.9742	2.11341e-10	NA	NA	NA	NA
Layer_4-6a_ExN	Vasc_2	Wnt7b	FZD4_LRP5	5.80232e-06	0	WNT7B_FZD4_LRP5	Wnt7b - (Fzd4+Lrp5)	WNT	Secreted Signaling	KEGG: mmu04310; PMID: 23209147	ctl	-0.297366	14.8814	18.3219	0.00057106	NA	NA	NA	NA
Astrocyte_2	Fibroblast_1	Wnt7b	FZD4_LRP5	1.87771e-06	0	WNT7B_FZD4_LRP5	Wnt7b - (Fzd4+Lrp5)	WNT	Secreted Signaling	KEGG: mmu04310; PMID: 23209147	ctl	-0.235807	10.674	12.4907	7.78488e-06	NA	NA	NA	NA
Layer_4-6a_ExN	Fibroblast_1	Wnt7b	FZD4_LRP5	7.28085e-06	0	WNT7B_FZD4_LRP5	Wnt7b - (Fzd4+Lrp5)	WNT	Secreted Signaling	KEGG: mmu04310; PMID: 23209147	ctl	-0.297366	14.8814	18.3219	0.00057106	NA	NA	NA	NA
Astrocyte_2	Fibroblast_1	Wnt7b	FZD7_LRP5	4.08317e-06	0	WNT7B_FZD7_LRP5	Wnt7b - (Fzd7+Lrp5)	WNT	Secreted Signaling	KEGG: mmu04310; PMID: 23209147	ctl	-0.235807	10.674	12.4907	7.78488e-06	NA	NA	NA	NA
Layer_4-6a_ExN	Fibroblast_1	Wnt7b	FZD7_LRP5	1.58324e-05	0	WNT7B_FZD7_LRP5	Wnt7b - (Fzd7+Lrp5)	WNT	Secreted Signaling	KEGG: mmu04310; PMID: 23209147	ctl	-0.297366	14.8814	18.3219	0.00057106	NA	NA	NA	NA
Astrocyte_2	Vasc_2	Wnt7b	FZD4_LRP6	1.62482e-06	0	WNT7B_FZD4_LRP6	Wnt7b - (Fzd4+Lrp6)	WNT	Secreted Signaling	KEGG: mmu04310; PMID: 23209147	ctl	-0.235807	10.674	12.4907	7.78488e-06	NA	NA	NA	NA
Layer_5-6a_ExN	Vasc_2	Wnt7b	FZD4_LRP6	5.33988e-07	0	WNT7B_FZD4_LRP6	Wnt7b - (Fzd4+Lrp6)	WNT	Secreted Signaling	KEGG: mmu04310; PMID: 23209147	ctl	-0.368472	5.50045	10.9742	2.11341e-10	NA	NA	NA	NA
Layer_4-6a_ExN	Vasc_2	Wnt7b	FZD4_LRP6	6.30027e-06	0	WNT7B_FZD4_LRP6	Wnt7b - (Fzd4+Lrp6)	WNT	Secreted Signaling	KEGG: mmu04310; PMID: 23209147	ctl	-0.297366	14.8814	18.3219	0.00057106	NA	NA	NA	NA
Astrocyte_2	Fibroblast_1	Wnt7b	FZD4_LRP6	3.12637e-06	0	WNT7B_FZD4_LRP6	Wnt7b - (Fzd4+Lrp6)	WNT	Secreted Signaling	KEGG: mmu04310; PMID: 23209147	ctl	-0.235807	10.674	12.4907	7.78488e-06	-1.31085	38.1481	47.9275	0.00983461
Layer_4-6a_ExN	Fibroblast_1	Wnt7b	FZD4_LRP6	1.21225e-05	0	WNT7B_FZD4_LRP6	Wnt7b - (Fzd4+Lrp6)	WNT	Secreted Signaling	KEGG: mmu04310; PMID: 23209147	ctl	-0.297366	14.8814	18.3219	0.00057106	-1.31085	38.1481	47.9275	0.00983461
Astrocyte_2	Fibroblast_1	Wnt7b	FZD7_LRP6	6.79842e-06	0	WNT7B_FZD7_LRP6	Wnt7b - (Fzd7+Lrp6)	WNT	Secreted Signaling	KEGG: mmu04310; PMID: 23209147	ctl	-0.235807	10.674	12.4907	7.78488e-06	-1.31085	38.1481	47.9275	0.00983461
Layer_4-6a_ExN	Fibroblast_1	Wnt7b	FZD7_LRP6	2.63606e-05	0	WNT7B_FZD7_LRP6	Wnt7b - (Fzd7+Lrp6)	WNT	Secreted Signaling	KEGG: mmu04310; PMID: 23209147	ctl	-0.297366	14.8814	18.3219	0.00057106	-1.31085	38.1481	47.9275	0.00983461
Astrocyte_2	Myeloid	Cx3cl1	Cx3cr1	1.7676e-05	0	CX3CL1_CX3CR1	Cx3cl1 - Cx3cr1	CX3C	Secreted Signaling	KEGG: mmu04060	ctl	-0.221405	19.0697	20.1496	0.0127717	NA	NA	NA	NA
Astrocyte_2	Microglia_1	Cx3cl1	Cx3cr1	3.59306e-05	0	CX3CL1_CX3CR1	Cx3cl1 - Cx3cr1	CX3C	Secreted Signaling	KEGG: mmu04060	ctl	-0.221405	19.0697	20.1496	0.0127717	NA	NA	NA	NA
Astrocyte_2	Microglia_2	Cx3cl1	Cx3cr1	0.000242008	0	CX3CL1_CX3CR1	Cx3cl1 - Cx3cr1	CX3C	Secreted Signaling	KEGG: mmu04060	ctl	-0.221405	19.0697	20.1496	0.0127717	-2.06217	85.6838	85.5292	0.0439012
