# Supplementary material for: Molecular Cartography of the Human and Mouse Down Syndrome Brain
Source: Research Square preprint supplement (doi:10.21203/rs.3.rs-5374449/v1), 2024-11-14
Supplement: Supplementary file 2 [file 398e06cf2392ad53551aea3c.xlsx]

## Sheet: P0_SVZ_Cellsubtype
p_val	avg_log2FC	pct.1	pct.2	p_val_adj	comparison	gene	FDR	sig	celltype	exp.1	exp.2	Region
1.37855e-31	1.20168	0.649	0.442	6.90652e-29	DS_vs_WT	Ncan	1.35098e-29	TRUE	Ependymal	6.37678	15.9672	SVZ
3.18617e-38	1.16285	0.688	0.518	1.59627e-35	DS_vs_WT	App	6.2449e-36	TRUE	Ependymal	6.17718	15.0697	SVZ
3.26617e-19	0.951005	0.534	0.321	1.63635e-16	DS_vs_WT	Aldh1l1	1.83657e-17	TRUE	Ependymal	3.65572	8.00054	SVZ
3.74809e-19	0.935243	0.476	0.332	1.87779e-16	DS_vs_WT	Lrp1	1.83657e-17	TRUE	Ependymal	3.02163	6.69022	SVZ
3.90764e-14	0.850142	0.402	0.286	1.95773e-11	DS_vs_WT	Notch2	1.2765e-12	TRUE	Ependymal	2.38854	5.10844	SVZ
2.21562e-10	0.843612	0.181	0.085	1.11003e-07	DS_vs_WT	Mdga1	4.34262e-09	TRUE	Ependymal	0.45312	1.60768	SVZ
2.42067e-12	0.820229	0.406	0.26	1.21275e-09	DS_vs_WT	Notch1	6.77787e-11	TRUE	Ependymal	2.35482	4.92357	SVZ
2.35369e-09	0.785234	0.288	0.171	1.1792e-06	DS_vs_WT	Dkk3	3.54864e-08	TRUE	Ependymal	1.29881	2.96171	SVZ
2.06594e-07	0.776941	0.165	0.089	0.000103504	DS_vs_WT	Arx	2.13118e-06	TRUE	Ependymal	0.535421	1.63093	SVZ
3.26039e-10	0.761905	0.333	0.211	1.63345e-07	DS_vs_WT	Dvl1	5.80941e-09	TRUE	Ependymal	1.45426	3.16176	SVZ
3.19422e-12	0.756964	0.111	0.022	1.6003e-09	DS_vs_WT	Gli1	7.82584e-11	TRUE	Ependymal	0.164026	0.967122	SVZ
5.88534e-11	0.75244	0.252	0.114	2.94856e-08	DS_vs_WT	Tubb3	1.2817e-09	TRUE	Ependymal	0.977978	2.33218	SVZ
1.33571e-18	0.750946	0.726	0.571	6.69189e-16	DS_vs_WT	Clu	5.23597e-17	TRUE	Ependymal	8.67299	15.2786	SVZ
4.59406e-10	0.72074	0.161	0.058	2.30162e-07	DS_vs_WT	Notch3	7.50363e-09	TRUE	Ependymal	0.375287	1.26651	SVZ
5.21341e-09	0.683704	0.313	0.226	2.61192e-06	DS_vs_WT	Pld3	6.81219e-08	TRUE	Ependymal	1.52361	3.05356	SVZ
3.13408e-09	0.646845	0.679	0.545	1.57018e-06	DS_vs_WT	Igfbp2	4.38772e-08	TRUE	Ependymal	10.8745	17.5924	SVZ
8.16474e-08	0.646417	0.248	0.136	4.09054e-05	DS_vs_WT	Cnp	8.8905e-07	TRUE	Ependymal	0.973798	2.08954	SVZ
1.06166e-06	0.634211	0.188	0.102	0.00053189	DS_vs_WT	Bcan	7.70684e-06	TRUE	Ependymal	0.656162	1.57051	SVZ
2.27663e-05	0.611398	0.212	0.129	0.0114059	DS_vs_WT	Tnc	0.000135218	TRUE	Ependymal	1.02572	2.09477	SVZ
3.48934e-07	0.610067	0.123	0.047	0.000174816	DS_vs_WT	Pdgfrb	3.10868e-06	TRUE	Ependymal	0.313745	1.00521	SVZ
2.44042e-07	0.606842	0.187	0.095	0.000122265	DS_vs_WT	Dyrk1a	2.39161e-06	TRUE	Ependymal	0.526421	1.32462	SVZ
4.60838e-05	0.604746	0.197	0.127	0.023088	DS_vs_WT	H2afx	0.00025807	TRUE	Ependymal	0.907243	1.90037	SVZ
5.61924e-08	0.602708	0.138	0.055	2.81524e-05	DS_vs_WT	Fzd8	6.47865e-07	TRUE	Ependymal	0.290478	0.959673	SVZ
4.74705e-07	0.591479	0.281	0.222	0.000237827	DS_vs_WT	Nlgn2	3.87675e-06	TRUE	Ependymal	1.37365	2.5766	SVZ
2.74538e-06	0.577016	0.304	0.223	0.00137544	DS_vs_WT	Pink1	1.92177e-05	TRUE	Ependymal	1.47895	2.698	SVZ
3.65345e-07	0.575277	0.127	0.052	0.000183038	DS_vs_WT	Fbln2	3.11338e-06	TRUE	Ependymal	0.266483	0.887013	SVZ
1.2623e-05	0.552598	0.225	0.14	0.00632411	DS_vs_WT	Vars	8.45237e-05	TRUE	Ependymal	0.899375	1.78586	SVZ
1.6551e-05	0.550744	0.083	0.03	0.00829207	DS_vs_WT	Olig2	0.000101375	TRUE	Ependymal	0.198584	0.755734	SVZ
2.77621e-05	0.548117	0.219	0.157	0.0139088	DS_vs_WT	Vars2	0.000160041	TRUE	Ependymal	0.892894	1.76774	SVZ
5.4685e-05	0.540635	0.264	0.188	0.0273972	DS_vs_WT	Dtx4	0.000289683	TRUE	Ependymal	1.27994	2.31642	SVZ
4.97841e-05	0.527359	0.274	0.194	0.0249418	DS_vs_WT	Foxo1	0.000271047	TRUE	Ependymal	1.32329	2.34854	SVZ
1.43512e-05	0.516112	0.342	0.274	0.00718996	DS_vs_WT	Pou3f3	9.07367e-05	TRUE	Ependymal	2.19078	3.56312	SVZ
9.57165e-07	0.511054	0.38	0.322	0.000479539	DS_vs_WT	Mtor	7.50417e-06	TRUE	Ependymal	2.18533	3.53939	SVZ
1.29373e-05	0.50504	0.201	0.113	0.00648159	DS_vs_WT	Acads	8.45237e-05	TRUE	Ependymal	0.682522	1.38777	SVZ
0.000102191	0.502994	0.187	0.12	0.0511975	DS_vs_WT	Qars	0.000488521	TRUE	Ependymal	0.691625	1.39729	SVZ
0.000594482	0.468755	0.167	0.105	0.297835	DS_vs_WT	Aldh2	0.00228468	TRUE	Ependymal	0.662409	1.30063	SVZ
0.000274499	0.461127	0.134	0.08	0.137524	DS_vs_WT	Nrf1	0.00122277	TRUE	Ependymal	0.409427	0.940241	SVZ
2.57331e-07	0.458089	0.083	0.022	0.000128923	DS_vs_WT	Ccn2	2.40176e-06	TRUE	Ependymal	0.140289	0.566439	SVZ
0.000540621	0.45546	0.134	0.082	0.270851	DS_vs_WT	Mapt	0.00211923	TRUE	Ependymal	0.477746	1.02632	SVZ
0.000122968	0.455257	0.355	0.257	0.061607	DS_vs_WT	Lmnb1	0.000573851	TRUE	Ependymal	2.30669	3.53357	SVZ
0.000211972	0.454004	0.13	0.072	0.106198	DS_vs_WT	Alkbh5	0.000966198	TRUE	Ependymal	0.36223	0.866033	SVZ
0.000458675	0.452347	0.359	0.273	0.229796	DS_vs_WT	Ctnnb1	0.00195436	TRUE	Ependymal	2.71389	4.08158	SVZ
0.000472114	0.442863	0.337	0.256	0.236529	DS_vs_WT	Gli3	0.0019611	TRUE	Ependymal	2.16358	3.30025	SVZ
0.00050692	0.435484	0.29	0.231	0.253967	DS_vs_WT	Sall1	0.00202768	TRUE	Ependymal	1.72369	2.68343	SVZ
0.000901578	0.431622	0.245	0.189	0.451691	DS_vs_WT	Gsk3b	0.00333414	TRUE	Ependymal	1.20734	1.97715	SVZ
6.03032e-05	0.427774	0.458	0.38	0.0302119	DS_vs_WT	Anxa6	0.000311038	TRUE	Ependymal	3.43881	4.97089	SVZ
0.00048027	0.424149	0.179	0.123	0.240615	DS_vs_WT	Cux1	0.0019611	TRUE	Ependymal	0.627586	1.18386	SVZ
0.000291853	0.423069	0.4	0.348	0.146219	DS_vs_WT	Lamp1	0.00127118	TRUE	Ependymal	3.56831	5.12509	SVZ
0.00125479	0.411588	0.159	0.114	0.628651	DS_vs_WT	Rcan1	0.00439177	TRUE	Ependymal	0.609952	1.14148	SVZ
0.00158115	0.410717	0.087	0.048	0.792158	DS_vs_WT	Ifngr1	0.00525265	TRUE	Ependymal	0.256674	0.670555	SVZ
0.00421955	0.399587	0.234	0.174	1	DS_vs_WT	Mdk	0.0111761	TRUE	Ependymal	1.17703	1.87178	SVZ
0.000955541	0.398864	0.147	0.111	0.478726	DS_vs_WT	Smpd1	0.00346826	TRUE	Ependymal	0.591098	1.09781	SVZ
0.00380464	0.398086	0.136	0.093	1	DS_vs_WT	Irf3	0.0105029	TRUE	Ependymal	0.488844	0.961937	SVZ
0.00304684	0.397343	0.147	0.097	1	DS_vs_WT	Gabbr1	0.00904819	TRUE	Ependymal	0.573739	1.07274	SVZ
0.00238969	0.396772	0.139	0.089	1	DS_vs_WT	Npc1	0.00755452	TRUE	Ependymal	0.494546	0.967658	SVZ
0.0163902	0.390843	0.125	0.081	1	DS_vs_WT	Ascl1	0.0356943	TRUE	Ependymal	0.678896	1.2013	SVZ
0.00418095	0.390304	0.143	0.092	1	DS_vs_WT	Glb1	0.0111761	TRUE	Ependymal	0.571962	1.06032	SVZ
0.00325046	0.388398	0.161	0.114	1	DS_vs_WT	Prdx5	0.0095088	TRUE	Ependymal	0.633346	1.13795	SVZ
0.00135134	0.381951	0.121	0.068	0.677023	DS_vs_WT	Aldh9a1	0.00464672	TRUE	Ependymal	0.397152	0.820632	SVZ
0.00247761	0.379797	0.212	0.17	1	DS_vs_WT	Aars	0.00770812	TRUE	Ependymal	0.966928	1.55929	SVZ
0.00137683	0.377404	0.134	0.081	0.689792	DS_vs_WT	Tapbp	0.00465274	TRUE	Ependymal	0.385161	0.799327	SVZ
0.00260036	0.37627	0.188	0.125	1	DS_vs_WT	Gli2	0.00796361	TRUE	Ependymal	0.795004	1.32988	SVZ
0.00886068	0.37231	0.281	0.233	1	DS_vs_WT	Tle3	0.0210446	TRUE	Ependymal	1.82076	2.65127	SVZ
0.00533191	0.37166	0.217	0.172	1	DS_vs_WT	Nfkb1	0.0137507	TRUE	Ependymal	1.04025	1.63976	SVZ
0.00391796	0.371375	0.252	0.21	1	DS_vs_WT	Lrp5	0.0106655	TRUE	Ependymal	1.3139	1.99323	SVZ
0.00352861	0.365414	0.248	0.214	1	DS_vs_WT	Axin2	0.0098801	TRUE	Ependymal	1.35129	2.02905	SVZ
0.00205109	0.364487	0.293	0.257	1	DS_vs_WT	Ep300	0.0065904	TRUE	Ependymal	1.75448	2.54618	SVZ
0.00860525	0.36295	0.159	0.129	1	DS_vs_WT	Tle1	0.0210446	TRUE	Ependymal	0.751348	1.25233	SVZ
0.00175392	0.352258	0.08	0.043	0.878713	DS_vs_WT	Col1a2	0.00572946	TRUE	Ependymal	0.186684	0.514869	SVZ
0.00889095	0.347451	0.118	0.079	1	DS_vs_WT	Cx3cl1	0.0210446	TRUE	Ependymal	0.427706	0.816485	SVZ
0.00120378	0.330998	0.082	0.037	0.603096	DS_vs_WT	Nfe2l2	0.00428985	TRUE	Ependymal	0.217882	0.531954	SVZ
0.007657	0.330362	0.111	0.07	1	DS_vs_WT	Csf2ra	0.0192407	TRUE	Ependymal	0.349156	0.696333	SVZ
0.0101525	0.328946	0.051	0.03	1	DS_vs_WT	Gad2	0.0236891	TRUE	Ependymal	0.162784	0.460567	SVZ
0.0127346	0.325542	0.132	0.108	1	DS_vs_WT	Vegfa	0.0286894	TRUE	Ependymal	0.657315	1.07684	SVZ
6.80295e-05	0.322994	0.078	0.028	0.0340828	DS_vs_WT	Sod1	0.000333345	TRUE	Ependymal	0.146057	0.433629	SVZ
0.0370017	0.31943	0.149	0.114	1	DS_vs_WT	Gstm1	0.0684182	FALSE	Ependymal	0.753797	1.18845	SVZ
0.0204037	0.318416	0.23	0.195	1	DS_vs_WT	Tle4	0.0425439	TRUE	Ependymal	1.35771	1.93997	SVZ
0.00571161	0.318094	0.085	0.044	1	DS_vs_WT	Fzd7	0.0145386	TRUE	Ependymal	0.284631	0.601527	SVZ
0.0209416	0.312538	0.187	0.156	1	DS_vs_WT	Bcl2l2	0.0432059	TRUE	Ependymal	0.957815	1.43139	SVZ
0.0126624	0.310001	0.13	0.084	1	DS_vs_WT	Psmb2	0.0286894	TRUE	Ependymal	0.532622	0.900004	SVZ
0.00349591	0.30992	0.085	0.043	1	DS_vs_WT	Tspo	0.0098801	TRUE	Ependymal	0.223107	0.516212	SVZ
0.0475626	0.308303	0.123	0.096	1	DS_vs_WT	Otx1	0.0817743	FALSE	Ependymal	0.599787	0.980936	SVZ
0.0242454	0.307864	0.214	0.166	1	DS_vs_WT	Hsf1	0.0480009	TRUE	Ependymal	1.00722	1.48468	SVZ
0.000751042	0.306959	0.315	0.3	0.376272	DS_vs_WT	Traf3	0.00283085	TRUE	Ependymal	2.06262	2.78876	SVZ
0.0144681	0.301849	0.143	0.096	1	DS_vs_WT	Ikbkg	0.0318624	TRUE	Ependymal	0.523012	0.877452	SVZ
0.0392408	0.300305	0.051	0.033	1	DS_vs_WT	Pdgfra	0.0704716	FALSE	Ependymal	0.215671	0.496984	SVZ
0.00340528	0.299685	0.319	0.298	1	DS_vs_WT	Cdkn1a	0.00981523	TRUE	Ependymal	2.34493	3.11719	SVZ
0.0135916	0.296802	0.094	0.06	1	DS_vs_WT	Prkaa1	0.0302722	TRUE	Ependymal	0.276697	0.568318	SVZ
0.00891176	0.292752	0.134	0.125	1	DS_vs_WT	Cpt1c	0.0210446	TRUE	Ependymal	0.698115	1.08015	SVZ
0.0203497	0.291553	0.083	0.058	1	DS_vs_WT	Mx1	0.0425439	TRUE	Ependymal	0.277878	0.564067	SVZ
0.00267115	0.291079	0.112	0.062	1	DS_vs_WT	Kif7	0.00805453	TRUE	Ependymal	0.320615	0.615846	SVZ
0.02242	0.2891	0.092	0.064	1	DS_vs_WT	Gba	0.0453022	TRUE	Ependymal	0.28381	0.568659	SVZ
0.0247669	0.282981	0.096	0.063	1	DS_vs_WT	Tbk1	0.0480624	TRUE	Ependymal	0.297413	0.578571	SVZ
0.0850534	0.282112	0.197	0.162	1	DS_vs_WT	Txnrd1	0.131541	FALSE	Ependymal	1.05438	1.49807	SVZ
0.0215728	0.280869	0.101	0.063	1	DS_vs_WT	Sars	0.0440444	TRUE	Ependymal	0.35704	0.648704	SVZ
0.0485811	0.280623	0.12	0.113	1	DS_vs_WT	Cdkn1c	0.0827992	FALSE	Ependymal	1.00474	1.4352	SVZ
0.046172	0.277505	0.085	0.056	1	DS_vs_WT	Gad1	0.080086	FALSE	Ependymal	0.318098	0.597663	SVZ
0.025026	0.273869	0.089	0.055	1	DS_vs_WT	Thbs1	0.0480893	TRUE	Ependymal	0.27389	0.540191	SVZ
0.0852329	0.27004	0.136	0.102	1	DS_vs_WT	Mecp2	0.131541	FALSE	Ependymal	0.681726	1.0279	SVZ
0.0863542	0.261976	0.226	0.201	1	DS_vs_WT	Apc	0.13223	FALSE	Ependymal	1.45144	1.93957	SVZ
0.0194109	0.260826	0.062	0.057	1	DS_vs_WT	Ldlr	0.0413537	TRUE	Ependymal	0.30439	0.562874	SVZ
0.0703141	0.258023	0.342	0.295	1	DS_vs_WT	Eif4g1	0.111599	FALSE	Ependymal	2.54374	3.23774	SVZ
0.0706037	0.256248	0.212	0.194	1	DS_vs_WT	Mavs	0.111599	FALSE	Ependymal	1.2557	1.69413	SVZ
0.0435592	0.255086	0.056	0.034	1	DS_vs_WT	Ccl25	0.0762286	FALSE	Ependymal	0.186939	0.416502	SVZ
0.0540734	0.247037	0.105	0.074	1	DS_vs_WT	Sirt3	0.0890621	FALSE	Ependymal	0.305769	0.549644	SVZ
0.0766304	0.235235	0.118	0.084	1	DS_vs_WT	Hras	0.120156	FALSE	Ependymal	0.46559	0.725144	SVZ
0.0395504	0.234678	0.112	0.101	1	DS_vs_WT	Otud4	0.0704716	FALSE	Ependymal	0.538714	0.810518	SVZ
0.151863	0.234245	0.13	0.103	1	DS_vs_WT	Wnt7a	0.220482	FALSE	Ependymal	0.655344	0.947165	SVZ
0.0534345	0.228333	0.089	0.057	1	DS_vs_WT	Rnf5	0.0887555	FALSE	Ependymal	0.303377	0.52688	SVZ
0.095354	0.223046	0.056	0.038	1	DS_vs_WT	S100a10	0.143764	FALSE	Ependymal	0.202078	0.40306	SVZ
6.80398e-09	0.222441	0.822	0.893	3.4088e-06	DS_vs_WT	Foxj1	8.33488e-08	TRUE	Ependymal	40.0402	46.8819	SVZ
0.0431248	0.219968	0.072	0.042	1	DS_vs_WT	Sufu	0.0761483	FALSE	Ependymal	0.244087	0.448998	SVZ
0.0522865	0.211966	0.069	0.042	1	DS_vs_WT	Hes1	0.0883462	FALSE	Ependymal	0.190398	0.378797	SVZ
0.0329582	0.205014	0.114	0.112	1	DS_vs_WT	Crebbp	0.061522	FALSE	Ependymal	0.557074	0.794834	SVZ
0.0649997	0.204578	0.192	0.188	1	DS_vs_WT	Ythdc1	0.105289	FALSE	Ependymal	1.16966	1.50021	SVZ
0.0319176	0.204249	0.051	0.029	1	DS_vs_WT	Cyba	0.0601524	FALSE	Ependymal	0.101527	0.269054	SVZ
0.191967	0.204014	0.083	0.059	1	DS_vs_WT	Mki67	0.266848	FALSE	Ependymal	0.495661	0.72285	SVZ
0.211134	0.19765	0.062	0.049	1	DS_vs_WT	Fzd5	0.289387	FALSE	Ependymal	0.258916	0.443761	SVZ
0.0390239	0.194714	0.129	0.088	1	DS_vs_WT	Smurf1	0.0704716	FALSE	Ependymal	0.630597	0.866214	SVZ
0.0168895	0.190007	0.214	0.226	1	DS_vs_WT	Zhx2	0.0363774	TRUE	Ependymal	1.58649	1.95059	SVZ
0.279744	0.188718	0.125	0.111	1	DS_vs_WT	Gsr	0.356038	FALSE	Ependymal	0.685102	0.920596	SVZ
0.0529226	0.186106	0.181	0.135	1	DS_vs_WT	Ptch1	0.0886567	FALSE	Ependymal	1.02008	1.29823	SVZ
0.327437	0.184199	0.139	0.121	1	DS_vs_WT	Sp1	0.40111	FALSE	Ependymal	0.778363	1.02055	SVZ
0.0113446	0.179295	0.071	0.036	1	DS_vs_WT	Ifnar2	0.0261593	TRUE	Ependymal	0.207355	0.367124	SVZ
0.242006	0.178264	0.199	0.165	1	DS_vs_WT	Prdx6	0.322674	FALSE	Ependymal	1.28001	1.57988	SVZ
0.137388	0.170403	0.159	0.123	1	DS_vs_WT	Psen1	0.202466	FALSE	Ependymal	0.740307	0.958494	SVZ
0.268746	0.165781	0.054	0.038	1	DS_vs_WT	Trp53	0.348836	FALSE	Ependymal	0.241983	0.393224	SVZ
0.190852	0.165366	0.121	0.092	1	DS_vs_WT	Psme1	0.266848	FALSE	Ependymal	0.534291	0.720632	SVZ
0.0246303	0.163732	0.063	0.068	1	DS_vs_WT	Cux2	0.0480624	TRUE	Ependymal	0.350537	0.512847	SVZ
0.320078	0.161181	0.192	0.182	1	DS_vs_WT	Ikbkb	0.397059	FALSE	Ependymal	1.19004	1.44891	SVZ
0.19655	0.161069	0.076	0.073	1	DS_vs_WT	Syt9	0.271295	FALSE	Ependymal	0.442022	0.612347	SVZ
0.25458	0.160304	0.053	0.039	1	DS_vs_WT	Lamp2	0.334884	FALSE	Ependymal	0.194525	0.334908	SVZ
0.237409	0.155408	0.076	0.055	1	DS_vs_WT	Traf2	0.318713	FALSE	Ependymal	0.279254	0.424752	SVZ
0.425041	0.151834	0.12	0.099	1	DS_vs_WT	Ythdf1	0.492947	FALSE	Ependymal	0.65461	0.83824	SVZ
0.42493	0.149715	0.141	0.123	1	DS_vs_WT	Mdm2	0.492947	FALSE	Ependymal	0.700447	0.886392	SVZ
0.292787	0.147035	0.082	0.064	1	DS_vs_WT	Optn	0.370234	FALSE	Ependymal	0.278884	0.416096	SVZ
0.145383	0.145549	0.051	0.043	1	DS_vs_WT	Myd88	0.21265	FALSE	Ependymal	0.152075	0.27437	SVZ
0.00880514	0.144155	0.062	0.03	1	DS_vs_WT	Fbln1	0.0210446	TRUE	Ependymal	0.196584	0.322324	SVZ
0.275575	0.138556	0.053	0.039	1	DS_vs_WT	Irf2	0.355346	FALSE	Ependymal	0.168854	0.286677	SVZ
0.298503	0.136749	0.089	0.067	1	DS_vs_WT	Rad9a	0.375042	FALSE	Ependymal	0.351708	0.486101	SVZ
0.109299	0.136652	0.072	0.046	1	DS_vs_WT	Fuca1	0.162293	FALSE	Ependymal	0.24082	0.364096	SVZ
0.37518	0.135627	0.051	0.039	1	DS_vs_WT	Aldh4a1	0.445669	FALSE	Ependymal	0.196255	0.314169	SVZ
0.382458	0.13398	0.089	0.069	1	DS_vs_WT	Ifnar1	0.451576	FALSE	Ependymal	0.445044	0.58567	SVZ
0.4405	0.133287	0.071	0.057	1	DS_vs_WT	Axin1	0.501965	FALSE	Ependymal	0.307808	0.434391	SVZ
0.335711	0.131701	0.138	0.132	1	DS_vs_WT	Mapk14	0.406169	FALSE	Ependymal	0.70618	0.869265	SVZ
0.311837	0.131576	0.071	0.066	1	DS_vs_WT	Sod2	0.389299	FALSE	Ependymal	0.371475	0.502438	SVZ
6.58855e-05	0.127673	0.504	0.398	0.0330087	DS_vs_WT	Fabp7	0.000331117	TRUE	Ependymal	7.10851	7.85879	SVZ
0.451057	0.125268	0.067	0.063	1	DS_vs_WT	Sirt5	0.511024	FALSE	Ependymal	0.345693	0.467761	SVZ
0.593474	0.122728	0.226	0.209	1	DS_vs_WT	Lrp6	0.649837	FALSE	Ependymal	1.50149	1.7236	SVZ
0.153993	0.121949	0.072	0.048	1	DS_vs_WT	Tyk2	0.221931	FALSE	Ependymal	0.273799	0.386153	SVZ
0.510171	0.118173	0.105	0.09	1	DS_vs_WT	Dlg4	0.571392	FALSE	Ependymal	0.443129	0.566314	SVZ
0.0264204	0.11591	0.121	0.082	1	DS_vs_WT	Hif1a	0.0502757	FALSE	Ependymal	0.516543	0.643414	SVZ
0.553979	0.114813	0.074	0.065	1	DS_vs_WT	Gria1	0.613445	FALSE	Ependymal	0.348912	0.460649	SVZ
0.159394	0.114541	0.06	0.06	1	DS_vs_WT	Sorl1	0.228038	FALSE	Ependymal	0.271358	0.376411	SVZ
0.435114	0.113504	0.06	0.047	1	DS_vs_WT	Gpx7	0.50166	FALSE	Ependymal	0.209046	0.30801	SVZ
0.101135	0.109278	0.058	0.035	1	DS_vs_WT	Nr4a2	0.151316	FALSE	Ependymal	0.199501	0.293888	SVZ
0.423917	0.106798	0.08	0.077	1	DS_vs_WT	Wars	0.492947	FALSE	Ependymal	0.400531	0.508142	SVZ
0.576845	0.0880116	0.051	0.042	1	DS_vs_WT	Rfx5	0.635178	FALSE	Ependymal	0.182521	0.256907	SVZ
0.75592	0.083897	0.139	0.127	1	DS_vs_WT	Arf1	0.797689	FALSE	Ependymal	0.765548	0.871264	SVZ
0.326167	0.073834	0.111	0.116	1	DS_vs_WT	Pdia3	0.40111	FALSE	Ependymal	0.669453	0.757116	SVZ
0.714947	0.0642831	0.062	0.061	1	DS_vs_WT	Acadl	0.765735	FALSE	Ependymal	0.369722	0.432133	SVZ
0.182915	0.0637834	0.053	0.033	1	DS_vs_WT	Cebpb	0.259792	FALSE	Ependymal	0.0751232	0.123722	SVZ
0.60766	0.0629612	0.096	0.099	1	DS_vs_WT	Jak2	0.661674	FALSE	Ependymal	0.572907	0.64307	SVZ
0.723807	0.0623112	0.054	0.045	1	DS_vs_WT	Casp7	0.771012	FALSE	Ependymal	0.215823	0.269486	SVZ
0.0234695	0.0606259	0.062	0.035	1	DS_vs_WT	Dgat1	0.046939	FALSE	Ependymal	0.231726	0.284589	SVZ
0.259418	0.0588208	0.054	0.038	1	DS_vs_WT	Wtap	0.338972	FALSE	Ependymal	0.253749	0.305923	SVZ
0.190422	0.0354415	0.056	0.04	1	DS_vs_WT	Sox5	0.266848	FALSE	Ependymal	0.277157	0.308921	SVZ
0.76106	0.0351119	0.071	0.062	1	DS_vs_WT	Vcan	0.797689	FALSE	Ependymal	0.477113	0.513503	SVZ
0.214719	0.0346829	0.08	0.061	1	DS_vs_WT	Tnfrsf1a	0.292256	FALSE	Ependymal	0.363282	0.396453	SVZ
0.871521	0.0302962	0.118	0.12	1	DS_vs_WT	Atf6	0.889678	FALSE	Ependymal	0.639935	0.674737	SVZ
0.331352	0.023418	0.058	0.044	1	DS_vs_WT	Vcam1	0.403385	FALSE	Ependymal	0.285611	0.30665	SVZ
0.933982	0.0220221	0.082	0.076	1	DS_vs_WT	Galc	0.943611	FALSE	Ependymal	0.364764	0.385756	SVZ
0.975612	0.00610876	0.062	0.063	1	DS_vs_WT	Smurf2	0.980615	FALSE	Ependymal	0.383085	0.388954	SVZ
1	0	1	1	1	DS_vs_WT	Unnamed: 0	1	FALSE	Ependymal	4.58947e-178	1.16962e-178	SVZ
0.840573	-0.00580863	0.221	0.231	1	DS_vs_WT	Fgfr2	0.862578	FALSE	Ependymal	1.76776	1.75664	SVZ
0.768801	-0.0146616	0.087	0.081	1	DS_vs_WT	Gusb	0.800131	FALSE	Ependymal	0.437535	0.423	SVZ
0.884378	-0.0152797	0.063	0.061	1	DS_vs_WT	Mapk1	0.898125	FALSE	Ependymal	0.360116	0.345786	SVZ
0.778316	-0.0224573	0.06	0.056	1	DS_vs_WT	Csnk1a1	0.802894	FALSE	Ependymal	0.38171	0.360369	SVZ
0.232477	-0.0238977	0.056	0.046	1	DS_vs_WT	Lef1	0.314244	FALSE	Ependymal	0.274025	0.253095	SVZ
0.0899553	-0.0364731	0.051	0.072	1	DS_vs_WT	Aqp4	0.136676	FALSE	Ependymal	0.435757	0.399914	SVZ
0.758188	-0.0383419	0.129	0.125	1	DS_vs_WT	Rac1	0.797689	FALSE	Ependymal	0.868212	0.819215	SVZ
0.632998	-0.0551791	0.156	0.152	1	DS_vs_WT	Fto	0.685456	FALSE	Ependymal	0.97734	0.903141	SVZ
0.693583	-0.0726558	0.074	0.087	1	DS_vs_WT	Rad50	0.746936	FALSE	Ependymal	0.450413	0.379178	SVZ
0.771555	-0.0766718	0.06	0.068	1	DS_vs_WT	Mettl3	0.800131	FALSE	Ependymal	0.41173	0.338663	SVZ
0.549581	-0.0767768	0.06	0.074	1	DS_vs_WT	Cflar	0.612033	FALSE	Ependymal	0.436676	0.362218	SVZ
0.277481	-0.0799192	0.072	0.094	1	DS_vs_WT	Itch	0.355466	FALSE	Ependymal	0.558118	0.474152	SVZ
0.0377271	-0.0993658	0.333	0.393	1	DS_vs_WT	Hsp90b1	0.0691076	FALSE	Ependymal	4.50402	4.13769	SVZ
0.366695	-0.136682	0.06	0.078	1	DS_vs_WT	Sirt1	0.438245	FALSE	Ependymal	0.447249	0.31643	SVZ
0.357198	-0.141171	0.149	0.154	1	DS_vs_WT	Jak1	0.429514	FALSE	Ependymal	1.10534	0.909081	SVZ
0.438119	-0.156017	0.103	0.119	1	DS_vs_WT	Nras	0.501965	FALSE	Ependymal	0.767066	0.58594	SVZ
0.248755	-0.167369	0.038	0.056	1	DS_vs_WT	Map2	0.329432	FALSE	Ependymal	0.367018	0.217282	SVZ
0.0592628	-0.259886	0.053	0.081	1	DS_vs_WT	Tnr	0.0967959	FALSE	Ependymal	0.530683	0.278356	SVZ
0.4833	-0.273349	0.054	0.056	1	DS_vs_WT	Gpx1	0.544407	FALSE	Ependymal	0.499724	0.240867	SVZ
0.00473323	-0.38618	0.08	0.132	1	DS_vs_WT	Slc1a3	0.0123695	TRUE	Ependymal	1.00124	0.531255	SVZ
0.0697849	-0.404611	0.132	0.171	1	DS_vs_WT	Gfap	0.111599	FALSE	Ependymal	1.9282	1.21208	SVZ
1.06026e-06	-0.40802	0.089	0.185	0.000531192	DS_vs_WT	Il6ra	7.70684e-06	TRUE	Ependymal	1.0892	0.57454	SVZ
p_val	avg_log2FC	pct.1	pct.2	p_val_adj	comparison	gene	FDR	sig	celltype	exp.1	exp.2	SVZ
2.99931e-28	0.981257	0.579	0.362	1.50265e-25	DS_vs_WT	Mdga1	2.69938e-26	TRUE	Excitatory_neuroblast	3.36631	7.6199	SVZ
7.38597e-44	0.781049	0.872	0.743	3.70037e-41	DS_vs_WT	App	1.32947e-41	TRUE	Excitatory_neuroblast	10.8741	19.4042	SVZ
2.35919e-11	0.677434	0.44	0.305	1.18196e-08	DS_vs_WT	Satb2	3.53879e-10	TRUE	Excitatory_neuroblast	2.8132	5.09842	SVZ
1.27915e-11	0.650454	0.396	0.27	6.40852e-09	DS_vs_WT	Dvl1	2.09315e-10	TRUE	Excitatory_neuroblast	1.76966	3.34743	SVZ
3.59444e-10	0.606126	0.219	0.11	1.80081e-07	DS_vs_WT	Igfbp2	4.62142e-09	TRUE	Excitatory_neuroblast	0.668878	1.54031	SVZ
5.67288e-05	0.566334	0.284	0.21	0.0284211	DS_vs_WT	Tnc	0.000278853	TRUE	Excitatory_neuroblast	2.06811	3.54313	SVZ
1.44198e-06	0.510492	0.209	0.122	0.000722434	DS_vs_WT	Dkk3	9.61322e-06	TRUE	Excitatory_neuroblast	0.907672	1.71755	SVZ
0.000711877	0.463311	0.114	0.068	0.356651	DS_vs_WT	Bcan	0.00266954	TRUE	Excitatory_neuroblast	0.472321	1.02989	SVZ
8.43664e-08	0.460562	0.211	0.114	4.22676e-05	DS_vs_WT	Cdkn1c	7.2314e-07	TRUE	Excitatory_neuroblast	0.807948	1.48788	SVZ
2.51375e-13	0.446123	0.791	0.735	1.25939e-10	DS_vs_WT	Ncan	6.46393e-12	TRUE	Excitatory_neuroblast	10.6949	14.9328	SVZ
5.73199e-05	0.414664	0.361	0.276	0.0287173	DS_vs_WT	Neurod1	0.000278853	TRUE	Excitatory_neuroblast	2.2071	3.27503	SVZ
7.69503e-10	0.402527	0.726	0.693	3.85521e-07	DS_vs_WT	Pou3f3	8.14768e-09	TRUE	Excitatory_neuroblast	8.57909	11.6618	SVZ
4.65961e-05	0.401847	0.407	0.319	0.0233446	DS_vs_WT	Rbfox3	0.000246685	TRUE	Excitatory_neuroblast	2.44135	3.5467	SVZ
0.000567119	0.393002	0.184	0.128	0.284127	DS_vs_WT	Acads	0.00217195	TRUE	Excitatory_neuroblast	0.808683	1.37502	SVZ
2.2526e-06	0.373918	0.647	0.573	0.00112855	DS_vs_WT	Lrp1	1.4481e-05	TRUE	Excitatory_neuroblast	6.17533	8.29828	SVZ
0.00155228	0.362135	0.127	0.085	0.777694	DS_vs_WT	Irf3	0.00498948	TRUE	Excitatory_neuroblast	0.457222	0.873006	SVZ
0.00073356	0.357991	0.32	0.254	0.367513	DS_vs_WT	Vars	0.00269471	TRUE	Excitatory_neuroblast	1.66837	2.41989	SVZ
2.02412e-05	0.336807	0.605	0.545	0.0101408	DS_vs_WT	Nlgn2	0.000113857	TRUE	Excitatory_neuroblast	5.31214	6.97197	SVZ
0.00618133	0.328692	0.234	0.197	1	DS_vs_WT	Notch1	0.0168582	TRUE	Excitatory_neuroblast	1.41999	2.0392	SVZ
0.000879328	0.318896	0.086	0.045	0.440543	DS_vs_WT	Kif7	0.00316558	TRUE	Excitatory_neuroblast	0.249947	0.559154	SVZ
0.00303632	0.314065	0.248	0.189	1	DS_vs_WT	Lrp5	0.00910897	TRUE	Excitatory_neuroblast	1.13973	1.66013	SVZ
0.017691	0.27884	0.258	0.222	1	DS_vs_WT	Ikbkb	0.0413556	TRUE	Excitatory_neuroblast	1.40525	1.9181	SVZ
1.86426e-05	0.260884	0.072	0.027	0.00933993	DS_vs_WT	Alkbh5	0.000108247	TRUE	Excitatory_neuroblast	0.164118	0.394861	SVZ
0.03053	0.243629	0.286	0.254	1	DS_vs_WT	Pink1	0.0670172	FALSE	Excitatory_neuroblast	1.6801	2.17315	SVZ
0.112933	0.214989	0.156	0.13	1	DS_vs_WT	Dyrk1a	0.183565	FALSE	Excitatory_neuroblast	0.786743	1.07386	SVZ
0.118675	0.211174	0.149	0.118	1	DS_vs_WT	Gli2	0.189347	FALSE	Excitatory_neuroblast	0.770564	1.04966	SVZ
0.105853	0.194158	0.204	0.168	1	DS_vs_WT	Tle1	0.178071	FALSE	Excitatory_neuroblast	1.02002	1.31102	SVZ
0.198723	0.190233	0.114	0.09	1	DS_vs_WT	Otx1	0.286161	FALSE	Excitatory_neuroblast	0.606173	0.83256	SVZ
0.0664963	0.189052	0.359	0.336	1	DS_vs_WT	Mtor	0.123395	FALSE	Excitatory_neuroblast	2.35457	2.82426	SVZ
0.24523	0.188728	0.161	0.14	1	DS_vs_WT	Notch2	0.344855	FALSE	Excitatory_neuroblast	1.03584	1.32037	SVZ
0.0377155	0.182569	0.095	0.063	1	DS_vs_WT	Ikbkg	0.0798682	FALSE	Excitatory_neuroblast	0.352779	0.535272	SVZ
0.101006	0.179127	0.099	0.074	1	DS_vs_WT	Nfkb1	0.173154	FALSE	Excitatory_neuroblast	0.363551	0.543811	SVZ
0.0946739	0.177584	0.147	0.136	1	DS_vs_WT	Hsf1	0.163859	FALSE	Excitatory_neuroblast	0.764154	0.995237	SVZ
0.0157888	0.171331	0.22	0.225	1	DS_vs_WT	Gabbr1	0.0389313	TRUE	Excitatory_neuroblast	1.39138	1.69292	SVZ
0.082493	0.169886	0.082	0.078	1	DS_vs_WT	Gpx1	0.145576	FALSE	Excitatory_neuroblast	0.39354	0.56769	SVZ
0.0547172	0.160794	0.063	0.038	1	DS_vs_WT	Cd68	0.107055	FALSE	Excitatory_neuroblast	0.221629	0.365662	SVZ
0.113198	0.159569	0.109	0.105	1	DS_vs_WT	Mdm2	0.183565	FALSE	Excitatory_neuroblast	0.575656	0.759934	SVZ
0.0249273	0.157874	0.178	0.181	1	DS_vs_WT	Cux1	0.0560865	FALSE	Excitatory_neuroblast	1.07669	1.31684	SVZ
0.263541	0.15008	0.111	0.089	1	DS_vs_WT	Fbln1	0.356672	FALSE	Excitatory_neuroblast	0.553953	0.724315	SVZ
0.254318	0.148303	0.361	0.329	1	DS_vs_WT	Mapt	0.346797	FALSE	Excitatory_neuroblast	2.46407	2.83911	SVZ
0.334558	0.14788	0.13	0.112	1	DS_vs_WT	Qars	0.430146	FALSE	Excitatory_neuroblast	0.689028	0.871342	SVZ
0.316094	0.147574	0.187	0.164	1	DS_vs_WT	Smurf1	0.409331	FALSE	Excitatory_neuroblast	0.997887	1.21307	SVZ
0.00804492	0.146546	0.05	0.023	1	DS_vs_WT	Col1a1	0.0212954	TRUE	Excitatory_neuroblast	0.116344	0.2357	SVZ
0.0163559	0.139308	0.152	0.11	1	DS_vs_WT	Vars2	0.0392541	TRUE	Excitatory_neuroblast	0.708873	0.882113	SVZ
0.28158	0.127021	0.057	0.044	1	DS_vs_WT	Mx1	0.37268	FALSE	Excitatory_neuroblast	0.211703	0.323223	SVZ
0.40467	0.119061	0.14	0.119	1	DS_vs_WT	Fbln2	0.498908	FALSE	Excitatory_neuroblast	0.888815	1.05131	SVZ
0.592503	0.114743	0.225	0.209	1	DS_vs_WT	Aldh1l1	0.670758	FALSE	Excitatory_neuroblast	1.8249	2.05875	SVZ
0.399723	0.112193	0.263	0.236	1	DS_vs_WT	Aars	0.498908	FALSE	Excitatory_neuroblast	1.64488	1.85877	SVZ
0.47936	0.106301	0.056	0.045	1	DS_vs_WT	Tapbp	0.570828	FALSE	Excitatory_neuroblast	0.273284	0.370646	SVZ
0.277096	0.104909	0.229	0.23	1	DS_vs_WT	Wnt7b	0.369461	FALSE	Excitatory_neuroblast	1.64109	1.84029	SVZ
0.0303693	0.0976512	0.169	0.13	1	DS_vs_WT	Gria1	0.0670172	FALSE	Excitatory_neuroblast	1.06342	1.20792	SVZ
0.526035	0.0958588	0.176	0.17	1	DS_vs_WT	Bcl2l2	0.610879	FALSE	Excitatory_neuroblast	1.02992	1.16938	SVZ
0.487044	0.0938498	0.051	0.043	1	DS_vs_WT	Fuca1	0.572993	FALSE	Excitatory_neuroblast	0.214627	0.296267	SVZ
0.0581537	0.0923972	0.169	0.181	1	DS_vs_WT	Mapk14	0.111358	FALSE	Excitatory_neuroblast	1.02125	1.15493	SVZ
0.625733	0.0873104	0.38	0.362	1	DS_vs_WT	Mdk	0.70395	FALSE	Excitatory_neuroblast	3.21844	3.48162	SVZ
0.00354087	0.0857942	0.359	0.395	1	DS_vs_WT	Tle3	0.0104485	FALSE	Excitatory_neuroblast	3.06507	3.31414	SVZ
0.741102	0.0825527	0.17	0.159	1	DS_vs_WT	Gli3	0.787823	FALSE	Excitatory_neuroblast	1.11725	1.24193	SVZ
0.512632	0.0823148	0.106	0.09	1	DS_vs_WT	Prdx5	0.59918	FALSE	Excitatory_neuroblast	0.525563	0.615137	SVZ
0.556227	0.0806944	0.059	0.048	1	DS_vs_WT	Traf2	0.6418	FALSE	Excitatory_neuroblast	0.269368	0.342391	SVZ
0.137141	0.0667897	0.103	0.112	1	DS_vs_WT	Rnf5	0.212804	FALSE	Excitatory_neuroblast	0.628452	0.705614	SVZ
0.77678	0.062753	0.079	0.073	1	DS_vs_WT	Smpd1	0.808211	FALSE	Excitatory_neuroblast	0.375948	0.437118	SVZ
0.706119	0.0619455	0.269	0.265	1	DS_vs_WT	Gsk3b	0.770311	FALSE	Excitatory_neuroblast	1.77324	1.89491	SVZ
0.15258	0.0588372	0.092	0.07	1	DS_vs_WT	H2afx	0.232749	FALSE	Excitatory_neuroblast	0.471351	0.532597	SVZ
0.565974	0.058398	0.048	0.05	1	DS_vs_WT	Ggt7	0.648887	FALSE	Excitatory_neuroblast	0.300903	0.354642	SVZ
0.108966	0.0582228	0.076	0.087	1	DS_vs_WT	Vegfa	0.181611	FALSE	Excitatory_neuroblast	0.462601	0.522834	SVZ
0.285752	0.0555418	0.066	0.051	1	DS_vs_WT	Optn	0.375441	FALSE	Excitatory_neuroblast	0.30191	0.353009	SVZ
0.175343	0.0536856	0.062	0.069	1	DS_vs_WT	Sox5	0.258703	FALSE	Excitatory_neuroblast	0.381924	0.434317	SVZ
0.112196	0.0530566	0.098	0.11	1	DS_vs_WT	Nrf1	0.183565	FALSE	Excitatory_neuroblast	0.572559	0.631468	SVZ
0.200927	0.0500931	0.149	0.159	1	DS_vs_WT	Rcan1	0.287038	FALSE	Excitatory_neuroblast	0.908964	0.976411	SVZ
0.0756992	0.0435249	0.052	0.035	1	DS_vs_WT	Csf2ra	0.137635	FALSE	Excitatory_neuroblast	0.232091	0.269828	SVZ
0.646257	0.0433901	0.053	0.044	1	DS_vs_WT	Ddit3	0.713658	FALSE	Excitatory_neuroblast	0.24992	0.288083	SVZ
0.403628	0.0423553	0.048	0.052	1	DS_vs_WT	Ptch1	0.498908	FALSE	Excitatory_neuroblast	0.288178	0.326557	SVZ
0.730586	0.0345408	0.151	0.139	1	DS_vs_WT	Trp53	0.782771	FALSE	Excitatory_neuroblast	0.884651	0.930318	SVZ
0.0333023	0.0333978	0.053	0.068	1	DS_vs_WT	Grin2b	0.0713621	FALSE	Excitatory_neuroblast	0.338606	0.369956	SVZ
0.640618	0.0327845	0.76	0.741	1	DS_vs_WT	Tubb3	0.711798	FALSE	Excitatory_neuroblast	12.6768	12.9912	SVZ
0.134945	0.0303908	0.349	0.373	1	DS_vs_WT	Eif4g1	0.211219	FALSE	Excitatory_neuroblast	2.91362	2.99693	SVZ
0.417831	0.0283548	0.072	0.061	1	DS_vs_WT	Fzd8	0.508173	FALSE	Excitatory_neuroblast	0.385497	0.412997	SVZ
0.00788125	0.0280023	0.174	0.207	1	DS_vs_WT	Psen1	0.0211735	FALSE	Excitatory_neuroblast	1.28636	1.33117	SVZ
0.212477	0.0253625	0.149	0.167	1	DS_vs_WT	Cnr1	0.301148	FALSE	Excitatory_neuroblast	1.18343	1.22215	SVZ
0.719506	0.0236093	0.101	0.092	1	DS_vs_WT	Grip1	0.779291	FALSE	Excitatory_neuroblast	0.557884	0.583588	SVZ
0.959515	0.0201311	0.059	0.059	1	DS_vs_WT	Tyk2	0.970297	FALSE	Excitatory_neuroblast	0.353484	0.372503	SVZ
0.0610363	0.0200155	0.069	0.085	1	DS_vs_WT	Tbk1	0.114905	FALSE	Excitatory_neuroblast	0.447234	0.467453	SVZ
0.748432	0.00772125	0.204	0.194	1	DS_vs_WT	Pld3	0.787823	FALSE	Excitatory_neuroblast	1.20749	1.21933	SVZ
0.0121913	0.0059559	0.126	0.155	1	DS_vs_WT	Dlg4	0.0309074	FALSE	Excitatory_neuroblast	0.861739	0.869441	SVZ
0.990109	0.00515849	0.077	0.078	1	DS_vs_WT	Atrip	0.99564	FALSE	Excitatory_neuroblast	0.480272	0.485575	SVZ
0.75783	0.00404805	0.057	0.061	1	DS_vs_WT	Aldh2	0.793078	FALSE	Excitatory_neuroblast	0.334812	0.338562	SVZ
1	0	1	1	1	DS_vs_WT	Unnamed: 0	1	FALSE	Excitatory_neuroblast	1.07757e-177	1.34978e-178	SVZ
0.482033	-0.00353902	0.069	0.079	1	DS_vs_WT	Lhx2	0.570828	FALSE	Excitatory_neuroblast	0.419597	0.416119	SVZ
0.119465	-0.00953291	0.141	0.164	1	DS_vs_WT	Traf3	0.189347	FALSE	Excitatory_neuroblast	0.963626	0.950694	SVZ
0.654997	-0.0134843	0.153	0.165	1	DS_vs_WT	Psme1	0.718899	FALSE	Excitatory_neuroblast	0.978136	0.959733	SVZ
0.30955	-0.0152411	0.054	0.045	1	DS_vs_WT	Lhx6	0.40376	FALSE	Excitatory_neuroblast	0.336141	0.3221	SVZ
0.456203	-0.0155446	0.076	0.087	1	DS_vs_WT	Clu	0.551118	FALSE	Excitatory_neuroblast	0.567445	0.550646	SVZ
0.867117	-0.0193136	0.116	0.123	1	DS_vs_WT	Cpt1c	0.891892	FALSE	Excitatory_neuroblast	0.727224	0.704255	SVZ
0.249968	-0.0242578	0.041	0.054	1	DS_vs_WT	Dgat1	0.346109	FALSE	Excitatory_neuroblast	0.264388	0.243306	SVZ
0.955165	-0.0296123	0.158	0.163	1	DS_vs_WT	Arx	0.970297	FALSE	Excitatory_neuroblast	1.27075	1.22462	SVZ
0.572649	-0.0309905	0.121	0.134	1	DS_vs_WT	Psmb2	0.652385	FALSE	Excitatory_neuroblast	0.824446	0.785673	SVZ
0.874669	-0.0364672	0.495	0.497	1	DS_vs_WT	Lmnb1	0.894548	FALSE	Excitatory_neuroblast	5.20229	5.04748	SVZ
0.630254	-0.0388908	0.37	0.39	1	DS_vs_WT	Ep300	0.704632	FALSE	Excitatory_neuroblast	3.03437	2.92707	SVZ
0.852201	-0.0467168	0.063	0.069	1	DS_vs_WT	Sirt5	0.881588	FALSE	Excitatory_neuroblast	0.409527	0.364616	SVZ
0.0523834	-0.0551998	0.041	0.061	1	DS_vs_WT	Sirt1	0.104794	FALSE	Excitatory_neuroblast	0.321363	0.27176	SVZ
0.190611	-0.0557911	0.08	0.1	1	DS_vs_WT	Tle4	0.276693	FALSE	Excitatory_neuroblast	0.562605	0.503331	SVZ
0.019717	-0.0570512	0.036	0.058	1	DS_vs_WT	Rgs8	0.0455008	FALSE	Excitatory_neuroblast	0.317299	0.266223	SVZ
0.189915	-0.0659687	0.074	0.094	1	DS_vs_WT	Syn1	0.276693	FALSE	Excitatory_neuroblast	0.553044	0.483629	SVZ
0.745712	-0.0692489	0.094	0.105	1	DS_vs_WT	Axin2	0.787823	FALSE	Excitatory_neuroblast	0.701285	0.621553	SVZ
0.723009	-0.0692501	0.079	0.082	1	DS_vs_WT	Dtx4	0.779291	FALSE	Excitatory_neuroblast	0.552505	0.479744	SVZ
0.0109971	-0.0694242	0.283	0.336	1	DS_vs_WT	Sorl1	0.0282781	FALSE	Excitatory_neuroblast	2.94587	2.76049	SVZ
0.17198	-0.0697154	0.072	0.094	1	DS_vs_WT	Atf6	0.25797	FALSE	Excitatory_neuroblast	0.516503	0.444964	SVZ
0.105644	-0.0697897	0.087	0.112	1	DS_vs_WT	Wnt7a	0.178071	FALSE	Excitatory_neuroblast	0.625835	0.549058	SVZ
0.00254411	-0.087229	0.384	0.453	1	DS_vs_WT	Txnrd1	0.00776171	FALSE	Excitatory_neuroblast	3.85053	3.56595	SVZ
0.386973	-0.0891224	0.041	0.055	1	DS_vs_WT	Mavs	0.487099	FALSE	Excitatory_neuroblast	0.333642	0.253749	SVZ
0.0529793	-0.0894873	0.043	0.066	1	DS_vs_WT	Trp53bp1	0.104794	FALSE	Excitatory_neuroblast	0.380436	0.297412	SVZ
0.46637	-0.0909917	0.086	0.09	1	DS_vs_WT	Hras	0.559645	FALSE	Excitatory_neuroblast	0.566055	0.470333	SVZ
0.407618	-0.0923029	0.051	0.065	1	DS_vs_WT	Axin1	0.499124	FALSE	Excitatory_neuroblast	0.391382	0.305151	SVZ
0.248712	-0.101045	0.093	0.116	1	DS_vs_WT	Ifnar1	0.346109	FALSE	Excitatory_neuroblast	0.694305	0.579697	SVZ
0.00108897	-0.103884	0.088	0.132	0.545573	DS_vs_WT	Otud4	0.00362989	TRUE	Excitatory_neuroblast	0.730637	0.610401	SVZ
0.0322186	-0.107425	0.029	0.052	1	DS_vs_WT	Npc2	0.0698717	FALSE	Excitatory_neuroblast	0.259734	0.16934	SVZ
0.0041452	-0.10829	0.037	0.067	1	DS_vs_WT	Braf	0.0118434	TRUE	Excitatory_neuroblast	0.34258	0.245494	SVZ
0.383864	-0.110805	0.043	0.056	1	DS_vs_WT	Traf6	0.487099	FALSE	Excitatory_neuroblast	0.317765	0.220345	SVZ
0.0413337	-0.115524	0.171	0.214	1	DS_vs_WT	Sars	0.0865123	FALSE	Excitatory_neuroblast	1.49186	1.3001	SVZ
0.268859	-0.11614	0.066	0.086	1	DS_vs_WT	Gba	0.361153	FALSE	Excitatory_neuroblast	0.537738	0.418799	SVZ
0.000469579	-0.1263	0.219	0.286	0.235259	DS_vs_WT	Lamp1	0.00187832	TRUE	Excitatory_neuroblast	2.1642	1.89897	SVZ
0.38485	-0.127639	0.066	0.082	1	DS_vs_WT	Sufu	0.487099	FALSE	Excitatory_neuroblast	0.512046	0.384019	SVZ
0.0560536	-0.12813	0.07	0.1	1	DS_vs_WT	Wars	0.108491	FALSE	Excitatory_neuroblast	0.580106	0.445823	SVZ
0.0684282	-0.132193	0.411	0.464	1	DS_vs_WT	Nos1	0.125684	FALSE	Excitatory_neuroblast	4.59474	4.10488	SVZ
0.252782	-0.145444	0.035	0.05	1	DS_vs_WT	Egfr	0.346797	FALSE	Excitatory_neuroblast	0.35512	0.225165	SVZ
0.174704	-0.146779	0.118	0.148	1	DS_vs_WT	Hif1a	0.258703	FALSE	Excitatory_neuroblast	0.935295	0.748084	SVZ
0.000912817	-0.157683	0.024	0.057	0.457321	DS_vs_WT	Cr1l	0.00322171	TRUE	Excitatory_neuroblast	0.291205	0.157519	SVZ
0.139782	-0.159794	0.1	0.13	1	DS_vs_WT	Ythdf1	0.215049	FALSE	Excitatory_neuroblast	0.800015	0.611289	SVZ
0.0449484	-0.169407	0.098	0.134	1	DS_vs_WT	Gad2	0.0929968	FALSE	Excitatory_neuroblast	0.853229	0.647906	SVZ
0.0912826	-0.177473	0.43	0.476	1	DS_vs_WT	Ctnnb1	0.159523	FALSE	Excitatory_neuroblast	5.28354	4.55623	SVZ
0.0170532	-0.178888	0.059	0.094	1	DS_vs_WT	Mettl3	0.0403891	TRUE	Excitatory_neuroblast	0.533152	0.354361	SVZ
1.51652e-07	-0.179072	0.192	0.285	7.59776e-05	DS_vs_WT	Zhx2	1.24079e-06	TRUE	Excitatory_neuroblast	2.02902	1.67544	SVZ
0.170351	-0.183258	0.153	0.184	1	DS_vs_WT	Sall1	0.257673	FALSE	Excitatory_neuroblast	1.30787	1.03256	SVZ
0.119919	-0.188627	0.079	0.105	1	DS_vs_WT	Npc1	0.189347	FALSE	Excitatory_neuroblast	0.667735	0.463338	SVZ
0.000122163	-0.190651	0.035	0.076	0.0612037	DS_vs_WT	Ccna2	0.000549734	TRUE	Excitatory_neuroblast	0.45098	0.271364	SVZ
0.00983125	-0.19419	0.036	0.067	1	DS_vs_WT	Rars	0.0256467	TRUE	Excitatory_neuroblast	0.427611	0.247823	SVZ
0.000949462	-0.202496	0.043	0.085	0.475681	DS_vs_WT	Casp3	0.0032866	TRUE	Excitatory_neuroblast	0.426986	0.240116	SVZ
0.078294	-0.207138	0.068	0.077	1	DS_vs_WT	Foxo1	0.14017	FALSE	Excitatory_neuroblast	0.565861	0.356433	SVZ
0.0160654	-0.215938	0.031	0.058	1	DS_vs_WT	Pex1	0.039078	TRUE	Excitatory_neuroblast	0.350763	0.162988	SVZ
0.00193779	-0.215944	0.056	0.097	0.970831	DS_vs_WT	Slc1a3	0.00611932	TRUE	Excitatory_neuroblast	0.691685	0.456511	SVZ
0.0140697	-0.226259	0.03	0.057	1	DS_vs_WT	Prkaa1	0.0351743	TRUE	Excitatory_neuroblast	0.360105	0.162684	SVZ
0.0528048	-0.228968	0.063	0.092	1	DS_vs_WT	Sp8	0.104794	FALSE	Excitatory_neuroblast	0.654631	0.411806	SVZ
0.0786508	-0.231466	0.116	0.151	1	DS_vs_WT	Ascl1	0.14017	FALSE	Excitatory_neuroblast	1.21693	0.888311	SVZ
0.000460416	-0.232227	0.135	0.201	0.230668	DS_vs_WT	Arf1	0.00187832	TRUE	Excitatory_neuroblast	1.33481	0.987669	SVZ
0.000985673	-0.237486	0.06	0.107	0.493822	DS_vs_WT	Prdx6	0.00334757	TRUE	Excitatory_neuroblast	0.731498	0.468696	SVZ
0.00558613	-0.241134	0.165	0.225	1	DS_vs_WT	Mecp2	0.015711	TRUE	Excitatory_neuroblast	1.6088	1.20726	SVZ
5.39038e-06	-0.245963	0.023	0.068	0.00270058	DS_vs_WT	Creb1	3.34575e-05	TRUE	Excitatory_neuroblast	0.387933	0.170378	SVZ
0.0227229	-0.253083	0.11	0.152	1	DS_vs_WT	Jak1	0.0517738	FALSE	Excitatory_neuroblast	1.00952	0.686189	SVZ
6.09121e-05	-0.255698	0.033	0.077	0.030517	DS_vs_WT	Topbp1	0.000288531	TRUE	Excitatory_neuroblast	0.504861	0.260444	SVZ
0.00139078	-0.257468	0.197	0.268	0.696782	DS_vs_WT	Lrp6	0.00455165	TRUE	Excitatory_neuroblast	1.90421	1.42953	SVZ
0.0492002	-0.257567	0.127	0.158	1	DS_vs_WT	Anxa6	0.100637	FALSE	Excitatory_neuroblast	1.1505	0.798889	SVZ
0.0612826	-0.258722	0.126	0.161	1	DS_vs_WT	Gad1	0.114905	FALSE	Excitatory_neuroblast	1.34333	0.958623	SVZ
0.000510206	-0.260209	0.037	0.08	0.255613	DS_vs_WT	Rad50	0.00199646	TRUE	Excitatory_neuroblast	0.485609	0.240434	SVZ
0.000235903	-0.261657	0.121	0.188	0.118188	DS_vs_WT	Crebbp	0.000987502	TRUE	Excitatory_neuroblast	1.14802	0.791724	SVZ
0.00234295	-0.267979	0.094	0.147	1	DS_vs_WT	Sp1	0.00727122	TRUE	Excitatory_neuroblast	0.910115	0.586316	SVZ
3.19169e-05	-0.277889	0.367	0.472	0.0159903	DS_vs_WT	Apc	0.000174092	TRUE	Excitatory_neuroblast	3.92673	3.06355	SVZ
0.000135283	-0.287205	0.051	0.103	0.0677769	DS_vs_WT	Mapk1	0.000593927	TRUE	Excitatory_neuroblast	0.585968	0.299682	SVZ
8.90631e-05	-0.292727	0.087	0.151	0.0446206	DS_vs_WT	Itch	0.00041106	TRUE	Excitatory_neuroblast	0.964523	0.603753	SVZ
0.000208754	-0.310128	0.042	0.089	0.104586	DS_vs_WT	Nlgn1	0.000894659	TRUE	Excitatory_neuroblast	0.637674	0.320898	SVZ
1.20659e-06	-0.319004	0.053	0.119	0.000604501	DS_vs_WT	Cd47	8.68744e-06	TRUE	Excitatory_neuroblast	0.708954	0.369938	SVZ
1.27381e-06	-0.327984	0.023	0.074	0.000638178	DS_vs_WT	Wtap	8.81867e-06	TRUE	Excitatory_neuroblast	0.453527	0.157951	SVZ
0.00370498	-0.33537	0.092	0.141	1	DS_vs_WT	Mki67	0.0107564	TRUE	Excitatory_neuroblast	1.13925	0.69553	SVZ
1.25126e-05	-0.339453	0.053	0.113	0.00626881	DS_vs_WT	Pdia3	7.50756e-05	TRUE	Excitatory_neuroblast	0.773124	0.401373	SVZ
2.81671e-09	-0.350703	0.03	0.1	1.41117e-06	DS_vs_WT	Ogt	2.66846e-08	TRUE	Excitatory_neuroblast	0.514802	0.187911	SVZ
0.00570265	-0.355371	0.059	0.093	1	DS_vs_WT	Gfap	0.0157919	TRUE	Excitatory_neuroblast	0.75913	0.375056	SVZ
8.00886e-13	-0.361637	0.155	0.288	4.01244e-10	DS_vs_WT	Ythdc1	1.80199e-11	TRUE	Excitatory_neuroblast	1.94124	1.28911	SVZ
4.69886e-07	-0.388426	0.063	0.137	0.000235413	DS_vs_WT	Jak2	3.67737e-06	TRUE	Excitatory_neuroblast	0.868432	0.427412	SVZ
4.14756e-10	-0.392953	0.324	0.473	2.07793e-07	DS_vs_WT	Cux2	4.97708e-09	TRUE	Excitatory_neuroblast	4.91911	3.50781	SVZ
4.95534e-05	-0.399891	0.036	0.085	0.0248263	DS_vs_WT	Fgfr2	0.000254846	TRUE	Excitatory_neuroblast	0.637523	0.241104	SVZ
2.62181e-09	-0.435046	0.035	0.11	1.31353e-06	DS_vs_WT	Csnk1a1	2.62181e-08	TRUE	Excitatory_neuroblast	0.664707	0.231334	SVZ
7.09759e-10	-0.459961	0.15	0.271	3.55589e-07	DS_vs_WT	Slc17a6	7.98478e-09	TRUE	Excitatory_neuroblast	2.22029	1.34117	SVZ
9.63274e-07	-0.480921	0.117	0.207	0.0004826	DS_vs_WT	Rac1	7.22456e-06	TRUE	Excitatory_neuroblast	1.55506	0.830753	SVZ
8.73145e-09	-0.505058	0.116	0.222	4.37445e-06	DS_vs_WT	Fto	7.8583e-08	TRUE	Excitatory_neuroblast	1.52731	0.780824	SVZ
2.8007e-16	-0.537069	0.408	0.604	1.40315e-13	DS_vs_WT	Fabp7	1.00825e-14	TRUE	Excitatory_neuroblast	8.65342	5.65284	SVZ
3.14912e-12	-0.584016	0.141	0.279	1.57771e-09	DS_vs_WT	Dcx	6.29824e-11	TRUE	Excitatory_neuroblast	2.40174	1.26931	SVZ
5.73713e-14	-0.624447	0.151	0.303	2.8743e-11	DS_vs_WT	Unc5d	1.72114e-12	TRUE	Excitatory_neuroblast	2.58526	1.32565	SVZ
1.84899e-10	-0.633665	0.059	0.151	9.26346e-08	DS_vs_WT	Vcan	2.56014e-09	TRUE	Excitatory_neuroblast	1.08924	0.346595	SVZ
1.11589e-11	-0.640674	0.07	0.178	5.59059e-09	DS_vs_WT	Nras	2.00859e-10	TRUE	Excitatory_neuroblast	1.30466	0.478239	SVZ
1.4823e-16	-0.682944	0.04	0.156	7.42633e-14	DS_vs_WT	Map2	6.67036e-15	TRUE	Excitatory_neuroblast	1.02786	0.263141	SVZ
1.57918e-17	-0.704627	0.157	0.332	7.91171e-15	DS_vs_WT	Hsp90b1	9.4751e-16	TRUE	Excitatory_neuroblast	2.77128	1.31406	SVZ
p_val	avg_log2FC	pct.1	pct.2	p_val_adj	comparison	gene	FDR	sig	celltype	exp.1	exp.2	SVZ
4.97075e-10	0.57319	0.212	0.139	2.49034e-07	DS_vs_WT	Aldh1l1	2.71616e-09	TRUE	Inhibitory_neuroblast	1.19112	2.25997	SVZ
1.21295e-31	0.564214	0.758	0.664	6.07686e-29	DS_vs_WT	App	9.27903e-30	TRUE	Inhibitory_neuroblast	9.28007	14.1999	SVZ
2.80287e-13	0.530158	0.298	0.219	1.40424e-10	DS_vs_WT	Dvl1	2.14419e-12	TRUE	Inhibitory_neuroblast	1.46594	2.56104	SVZ
8.26015e-22	0.471363	0.755	0.661	4.13834e-19	DS_vs_WT	Ncan	1.80543e-20	TRUE	Inhibitory_neuroblast	9.21716	13.1653	SVZ
3.95528e-15	0.463752	0.585	0.493	1.9816e-12	DS_vs_WT	Arx	3.78224e-14	TRUE	Inhibitory_neuroblast	5.44003	7.88161	SVZ
6.6882e-15	0.455953	0.55	0.47	3.35079e-12	DS_vs_WT	Lrp1	6.01732e-14	TRUE	Inhibitory_neuroblast	4.51362	6.56297	SVZ
3.03997e-08	0.428083	0.208	0.134	1.52303e-05	DS_vs_WT	Igfbp2	1.36799e-07	TRUE	Inhibitory_neuroblast	0.955352	1.63082	SVZ
1.08559e-08	0.410679	0.274	0.226	5.43883e-06	DS_vs_WT	Vars	5.03321e-08	TRUE	Inhibitory_neuroblast	1.57982	2.42939	SVZ
9.22242e-05	0.388702	0.136	0.1	0.0462043	DS_vs_WT	Clu	0.000211225	TRUE	Inhibitory_neuroblast	0.759117	1.30306	SVZ
4.3427e-07	0.388566	0.108	0.067	0.000217569	DS_vs_WT	Vars2	1.58198e-06	TRUE	Inhibitory_neuroblast	0.38185	0.808967	SVZ
5.39102e-06	0.384769	0.079	0.049	0.0027009	DS_vs_WT	Mdga1	1.4755e-05	TRUE	Inhibitory_neuroblast	0.264817	0.651409	SVZ
4.12141e-05	0.378467	0.124	0.098	0.0206483	DS_vs_WT	Tnc	0.000101706	TRUE	Inhibitory_neuroblast	0.718424	1.23388	SVZ
3.7087e-05	0.360717	0.194	0.146	0.0185806	DS_vs_WT	Dyrk1a	9.45718e-05	TRUE	Inhibitory_neuroblast	1.07921	1.66984	SVZ
4.80717e-06	0.341999	0.281	0.243	0.00240839	DS_vs_WT	Tle1	1.36203e-05	TRUE	Inhibitory_neuroblast	1.87995	2.65037	SVZ
3.41e-05	0.340638	0.094	0.07	0.0170841	DS_vs_WT	Dkk3	8.84289e-05	TRUE	Inhibitory_neuroblast	0.458581	0.847025	SVZ
5.40053e-06	0.316257	0.053	0.027	0.00270566	DS_vs_WT	Satb2	1.4755e-05	TRUE	Inhibitory_neuroblast	0.132454	0.410015	SVZ
0.0012328	0.311475	0.161	0.125	0.617634	DS_vs_WT	H2afx	0.00219324	TRUE	Inhibitory_neuroblast	0.953242	1.42393	SVZ
1.79847e-06	0.270294	0.418	0.404	0.000901032	DS_vs_WT	Pou3f3	5.72e-06	TRUE	Inhibitory_neuroblast	3.74204	4.71915	SVZ
0.000354414	0.259778	0.09	0.077	0.177561	DS_vs_WT	Notch2	0.000742813	TRUE	Inhibitory_neuroblast	0.459437	0.747375	SVZ
0.00250234	0.259051	0.222	0.194	1	DS_vs_WT	Pink1	0.00420213	TRUE	Inhibitory_neuroblast	1.46668	1.95185	SVZ
0.00266117	0.25905	0.093	0.068	1	DS_vs_WT	Qars	0.00437805	TRUE	Inhibitory_neuroblast	0.416199	0.694752	SVZ
0.014305	0.256027	0.091	0.068	1	DS_vs_WT	Bcan	0.0206478	TRUE	Inhibitory_neuroblast	0.500571	0.791961	SVZ
0.019891	0.249744	0.137	0.107	1	DS_vs_WT	Gria1	0.0271726	TRUE	Inhibitory_neuroblast	0.944326	1.3118	SVZ
0.000239816	0.248193	0.051	0.034	0.120148	DS_vs_WT	Fzd8	0.000516788	TRUE	Inhibitory_neuroblast	0.190653	0.414161	SVZ
1.59456e-07	0.225312	0.917	0.874	7.98875e-05	DS_vs_WT	Tubb3	6.25559e-07	TRUE	Inhibitory_neuroblast	23.666	27.8353	SVZ
0.0104877	0.216934	0.112	0.084	1	DS_vs_WT	Acads	0.015429	TRUE	Inhibitory_neuroblast	0.532102	0.780701	SVZ
0.0137343	0.210752	0.217	0.2	1	DS_vs_WT	Notch1	0.0200128	TRUE	Inhibitory_neuroblast	1.57988	1.98567	SVZ
0.0157198	0.204723	0.144	0.126	1	DS_vs_WT	Lrp5	0.0223777	TRUE	Inhibitory_neuroblast	0.776946	1.04787	SVZ
0.00323407	0.198834	0.079	0.068	1	DS_vs_WT	Hras	0.00526396	TRUE	Inhibitory_neuroblast	0.368572	0.570807	SVZ
0.000754368	0.182051	0.307	0.307	0.377939	DS_vs_WT	Mapt	0.00140754	TRUE	Inhibitory_neuroblast	2.56997	3.05012	SVZ
0.022723	0.181484	0.082	0.066	1	DS_vs_WT	Irf3	0.0304967	TRUE	Inhibitory_neuroblast	0.360276	0.542621	SVZ
0.000375744	0.168913	0.409	0.408	0.188248	DS_vs_WT	Nlgn2	0.000776876	TRUE	Inhibitory_neuroblast	3.57131	4.13912	SVZ
0.0266428	0.168869	0.24	0.231	1	DS_vs_WT	Mdk	0.0339044	TRUE	Inhibitory_neuroblast	1.97458	2.34395	SVZ
0.0196788	0.168411	0.077	0.069	1	DS_vs_WT	Gli2	0.0271248	TRUE	Inhibitory_neuroblast	0.407889	0.582213	SVZ
0.00568539	0.16744	0.119	0.115	1	DS_vs_WT	Smurf1	0.00861252	TRUE	Inhibitory_neuroblast	0.742564	0.95701	SVZ
9.24971e-05	0.167192	0.118	0.122	0.046341	DS_vs_WT	Pld3	0.000211225	TRUE	Inhibitory_neuroblast	0.751539	0.966751	SVZ
0.066135	0.166373	0.08	0.064	1	DS_vs_WT	Gli3	0.0755124	FALSE	Inhibitory_neuroblast	0.388536	0.558262	SVZ
0.0587095	0.161374	0.076	0.067	1	DS_vs_WT	Dtx4	0.0680496	FALSE	Inhibitory_neuroblast	0.407222	0.57377	SVZ
0.0975761	0.161164	0.097	0.079	1	DS_vs_WT	Ikbkg	0.108972	FALSE	Inhibitory_neuroblast	0.506549	0.684606	SVZ
0.00369374	0.15936	0.201	0.196	1	DS_vs_WT	Ikbkb	0.0058869	TRUE	Inhibitory_neuroblast	1.27906	1.54523	SVZ
0.023613	0.147577	0.118	0.119	1	DS_vs_WT	Ascl1	0.0311214	TRUE	Inhibitory_neuroblast	0.879732	1.08219	SVZ
0.0234682	0.143613	0.131	0.129	1	DS_vs_WT	Trp53	0.0311214	TRUE	Inhibitory_neuroblast	0.90938	1.10923	SVZ
0.00530863	0.139193	0.115	0.116	1	DS_vs_WT	Traf3	0.00812221	TRUE	Inhibitory_neuroblast	0.729489	0.904666	SVZ
0.00182062	0.127054	0.305	0.315	0.91213	DS_vs_WT	Sall1	0.00312983	TRUE	Inhibitory_neuroblast	2.55292	2.88001	SVZ
0.315246	0.125764	0.135	0.12	1	DS_vs_WT	Psmb2	0.325896	FALSE	Inhibitory_neuroblast	0.900123	1.0732	SVZ
0.0300761	0.122317	0.093	0.093	1	DS_vs_WT	Rcan1	0.03711	TRUE	Inhibitory_neuroblast	0.593309	0.734287	SVZ
0.00243169	0.121791	0.085	0.09	1	DS_vs_WT	Prdx5	0.00413388	TRUE	Inhibitory_neuroblast	0.563972	0.701734	SVZ
0.267638	0.113066	0.221	0.211	1	DS_vs_WT	Aars	0.279048	FALSE	Inhibitory_neuroblast	1.56256	1.77147	SVZ
0.0407976	0.110108	0.15	0.152	1	DS_vs_WT	Psme1	0.0491498	TRUE	Inhibitory_neuroblast	1.08674	1.25224	SVZ
0.000167699	0.108329	0.26	0.28	0.0840173	DS_vs_WT	Mtor	0.000377323	TRUE	Inhibitory_neuroblast	1.98171	2.21422	SVZ
0.0728831	0.104476	0.053	0.052	1	DS_vs_WT	Atrip	0.0826009	FALSE	Inhibitory_neuroblast	0.314851	0.413601	SVZ
0.00732441	0.103936	0.079	0.083	1	DS_vs_WT	Gpx1	0.0108799	TRUE	Inhibitory_neuroblast	0.546323	0.661835	SVZ
0.268105	0.103524	0.07	0.064	1	DS_vs_WT	Cdkn1c	0.279048	FALSE	Inhibitory_neuroblast	0.404342	0.508817	SVZ
0.0298499	0.0958223	0.091	0.094	1	DS_vs_WT	Nrf1	0.03711	FALSE	Inhibitory_neuroblast	0.589593	0.698757	SVZ
0.0348947	0.0934431	0.047	0.055	1	DS_vs_WT	Foxj1	0.0423721	FALSE	Inhibitory_neuroblast	0.43572	0.531789	SVZ
0.00366646	0.0921679	0.047	0.052	1	DS_vs_WT	Vegfa	0.0058869	FALSE	Inhibitory_neuroblast	0.296046	0.381547	SVZ
0.0167132	0.0884826	0.638	0.65	1	DS_vs_WT	Gad1	0.0234599	FALSE	Inhibitory_neuroblast	8.71029	9.32448	SVZ
0.483466	0.0785359	0.052	0.047	1	DS_vs_WT	Kif7	0.493135	FALSE	Inhibitory_neuroblast	0.276717	0.348145	SVZ
0.00389942	0.0760668	0.094	0.106	1	DS_vs_WT	Rnf5	0.00615064	FALSE	Inhibitory_neuroblast	0.665296	0.755456	SVZ
0.000437893	0.0745811	0.064	0.076	0.219384	DS_vs_WT	Sufu	0.000881753	FALSE	Inhibitory_neuroblast	0.451931	0.528963	SVZ
0.341763	0.0636445	0.151	0.152	1	DS_vs_WT	Anxa6	0.350938	FALSE	Inhibitory_neuroblast	1.03856	1.13051	SVZ
0.0237987	0.062434	0.052	0.059	1	DS_vs_WT	Clspn	0.0311214	FALSE	Inhibitory_neuroblast	0.347868	0.407478	SVZ
3.90853e-05	0.0477693	0.43	0.472	0.0195817	DS_vs_WT	Gad2	9.80335e-05	FALSE	Inhibitory_neuroblast	4.73827	4.93145	SVZ
0.0256754	0.04701	0.145	0.159	1	DS_vs_WT	Fbln1	0.033291	FALSE	Inhibitory_neuroblast	1.15993	1.23147	SVZ
0.0206245	0.0441502	0.135	0.149	1	DS_vs_WT	Bcl2l2	0.0279252	FALSE	Inhibitory_neuroblast	0.968538	1.02971	SVZ
0.0268133	0.04318	0.08	0.09	1	DS_vs_WT	Zhx2	0.0339044	FALSE	Inhibitory_neuroblast	0.547096	0.594101	SVZ
0.000933716	0.0418391	0.103	0.125	0.467792	DS_vs_WT	Tle4	0.0017007	FALSE	Inhibitory_neuroblast	1.05835	1.11891	SVZ
0.0581374	0.0403537	0.109	0.119	1	DS_vs_WT	Hsf1	0.0679009	FALSE	Inhibitory_neuroblast	0.764162	0.814204	SVZ
4.20515e-06	0.035644	0.109	0.14	0.00210678	DS_vs_WT	Syn1	1.21394e-05	FALSE	Inhibitory_neuroblast	0.927045	0.975249	SVZ
0.158694	0.029691	0.288	0.302	1	DS_vs_WT	Gsk3b	0.1722	FALSE	Inhibitory_neuroblast	2.55242	2.62629	SVZ
0.117426	0.0279584	0.334	0.35	1	DS_vs_WT	Ep300	0.13019	FALSE	Inhibitory_neuroblast	3.00985	3.08832	SVZ
0.000781171	0.026399	0.097	0.117	0.391366	DS_vs_WT	Ythdf1	0.00143999	FALSE	Inhibitory_neuroblast	0.753345	0.785723	SVZ
0.199185	0.0256389	0.06	0.069	1	DS_vs_WT	Cnr1	0.213114	FALSE	Inhibitory_neuroblast	0.509332	0.536395	SVZ
2.03509e-06	0.0233507	0.186	0.227	0.00101958	DS_vs_WT	Gabbr1	6.22737e-06	FALSE	Inhibitory_neuroblast	1.60455	1.64705	SVZ
0.0943125	0.0186242	0.316	0.335	1	DS_vs_WT	Eif4g1	0.106102	FALSE	Inhibitory_neuroblast	2.83155	2.88134	SVZ
0.00252677	0.0147689	0.041	0.054	1	DS_vs_WT	Axin1	0.00420213	FALSE	Inhibitory_neuroblast	0.325819	0.339461	SVZ
1.15322e-06	0.0103925	0.164	0.204	0.000577764	DS_vs_WT	Sars	3.75411e-06	FALSE	Inhibitory_neuroblast	1.41675	1.43422	SVZ
0.0169372	0.00833003	0.121	0.139	1	DS_vs_WT	Grip1	0.0235582	FALSE	Inhibitory_neuroblast	0.931683	0.942869	SVZ
0.846191	0.00578903	0.188	0.192	1	DS_vs_WT	Fbln2	0.851758	FALSE	Inhibitory_neuroblast	1.75928	1.77037	SVZ
0.000352766	0.00486316	0.068	0.09	0.176736	DS_vs_WT	Cpt1c	0.000742813	FALSE	Inhibitory_neuroblast	0.553095	0.558339	SVZ
1	0	1	1	1	DS_vs_WT	Unnamed: 0	1	FALSE	Inhibitory_neuroblast	1.146e-177	1.39628e-178	SVZ
0.0435724	-0.0016759	0.079	0.093	1	DS_vs_WT	Mdm2	0.0516789	FALSE	Inhibitory_neuroblast	0.595456	0.593604	SVZ
0.0320381	-0.0138752	0.039	0.052	1	DS_vs_WT	Sirt5	0.0392147	FALSE	Inhibitory_neuroblast	0.276462	0.264244	SVZ
0.028961	-0.014831	0.077	0.094	1	DS_vs_WT	Prdx6	0.03632	FALSE	Inhibitory_neuroblast	0.630225	0.613552	SVZ
4.30984e-05	-0.0154733	0.151	0.189	0.0215923	DS_vs_WT	Psen1	0.000104668	FALSE	Inhibitory_neuroblast	1.29687	1.27237	SVZ
2.20909e-07	-0.0160185	0.071	0.103	0.000110676	DS_vs_WT	Wars	8.44978e-07	FALSE	Inhibitory_neuroblast	0.611322	0.59353	SVZ
5.28422e-05	-0.0163131	0.059	0.083	0.026474	DS_vs_WT	Tbk1	0.000126326	FALSE	Inhibitory_neuroblast	0.470249	0.453718	SVZ
0.00423642	-0.0172636	0.047	0.064	1	DS_vs_WT	Ptch1	0.00661401	FALSE	Inhibitory_neuroblast	0.368201	0.351926	SVZ
0.0261036	-0.019643	0.104	0.124	1	DS_vs_WT	Cux1	0.0335618	FALSE	Inhibitory_neuroblast	0.816093	0.791534	SVZ
0.0045223	-0.02029	0.433	0.476	1	DS_vs_WT	Txnrd1	0.00698901	FALSE	Inhibitory_neuroblast	4.73182	4.65177	SVZ
0.0517696	-0.0203436	0.052	0.065	1	DS_vs_WT	Smpd1	0.0609288	FALSE	Inhibitory_neuroblast	0.380831	0.361497	SVZ
0.186331	-0.0208188	0.57	0.598	1	DS_vs_WT	Lmnb1	0.200765	FALSE	Inhibitory_neuroblast	7.64215	7.51833	SVZ
0.0432274	-0.0299628	0.046	0.06	1	DS_vs_WT	Otx1	0.0516703	FALSE	Inhibitory_neuroblast	0.359056	0.331121	SVZ
3.71842e-09	-0.0421924	0.064	0.102	1.86293e-06	DS_vs_WT	Fgfr2	1.77787e-08	FALSE	Inhibitory_neuroblast	0.607026	0.560708	SVZ
0.127255	-0.0440351	0.059	0.074	1	DS_vs_WT	Nfkb1	0.140072	FALSE	Inhibitory_neuroblast	0.453769	0.410066	SVZ
0.062226	-0.0441324	0.054	0.069	1	DS_vs_WT	Rars	0.0715833	FALSE	Inhibitory_neuroblast	0.471711	0.427372	SVZ
0.620685	-0.0445209	0.108	0.118	1	DS_vs_WT	Ifnar1	0.628906	FALSE	Inhibitory_neuroblast	0.802269	0.747501	SVZ
5.14684e-08	-0.0547267	0.054	0.093	2.57857e-05	DS_vs_WT	Cux2	2.24991e-07	FALSE	Inhibitory_neuroblast	0.58903	0.529882	SVZ
0.00097824	-0.0550105	0.12	0.153	0.490098	DS_vs_WT	Hif1a	0.00176083	FALSE	Inhibitory_neuroblast	1.03705	0.960837	SVZ
0.00125627	-0.0553792	0.071	0.098	0.629389	DS_vs_WT	Jak1	0.0022093	FALSE	Inhibitory_neuroblast	0.608647	0.548068	SVZ
0.145508	-0.0589582	0.045	0.058	1	DS_vs_WT	Sod2	0.15902	FALSE	Inhibitory_neuroblast	0.373102	0.318119	SVZ
0.000643146	-0.0621907	0.046	0.069	0.322216	DS_vs_WT	Topbp1	0.00123002	FALSE	Inhibitory_neuroblast	0.403107	0.343908	SVZ
0.00598011	-0.0674935	0.07	0.095	1	DS_vs_WT	Axin2	0.00897017	FALSE	Inhibitory_neuroblast	0.585159	0.512709	SVZ
0.000578497	-0.0691932	0.397	0.454	0.289827	DS_vs_WT	Ctnnb1	0.00112038	FALSE	Inhibitory_neuroblast	5.01137	4.72986	SVZ
0.206165	-0.0720744	0.085	0.101	1	DS_vs_WT	Dlg4	0.21905	FALSE	Inhibitory_neuroblast	0.688444	0.606165	SVZ
0.2254	-0.0765038	0.043	0.055	1	DS_vs_WT	Aldh2	0.237836	FALSE	Inhibitory_neuroblast	0.363152	0.29275	SVZ
0.00157875	-0.10477	0.032	0.054	0.790951	DS_vs_WT	Pex1	0.00274486	TRUE	Inhibitory_neuroblast	0.394793	0.297092	SVZ
8.17448e-06	-0.107057	0.222	0.283	0.00409541	DS_vs_WT	Wnt7a	2.1942e-05	TRUE	Inhibitory_neuroblast	2.04739	1.82944	SVZ
0.000464552	-0.117881	0.274	0.331	0.232741	DS_vs_WT	Tle3	0.000923072	TRUE	Inhibitory_neuroblast	2.69624	2.40623	SVZ
0.00067024	-0.119846	0.374	0.436	0.33579	DS_vs_WT	Sp8	0.00126601	TRUE	Inhibitory_neuroblast	4.16643	3.75459	SVZ
1.20149e-05	-0.121616	0.041	0.073	0.00601948	DS_vs_WT	Traf6	3.16946e-05	TRUE	Inhibitory_neuroblast	0.461705	0.343537	SVZ
0.000437995	-0.126857	0.124	0.166	0.219436	DS_vs_WT	Mapk14	0.000881753	TRUE	Inhibitory_neuroblast	1.11143	0.933698	SVZ
0.000225934	-0.128871	0.031	0.057	0.113193	DS_vs_WT	Sirt1	0.000493828	TRUE	Inhibitory_neuroblast	0.3736	0.256221	SVZ
0.015796	-0.133361	0.031	0.051	1	DS_vs_WT	Cnp	0.0223777	TRUE	Inhibitory_neuroblast	0.312825	0.196908	SVZ
7.47275e-08	-0.136277	0.057	0.1	3.74385e-05	DS_vs_WT	Npc1	3.13352e-07	TRUE	Inhibitory_neuroblast	0.634685	0.487342	SVZ
9.40265e-07	-0.144187	0.022	0.053	0.000471073	DS_vs_WT	Wtap	3.1274e-06	TRUE	Inhibitory_neuroblast	0.297967	0.174517	SVZ
0.000199754	-0.1458	0.085	0.124	0.100077	DS_vs_WT	Otud4	0.000442934	TRUE	Inhibitory_neuroblast	0.860695	0.681841	SVZ
6.00082e-05	-0.155928	0.088	0.131	0.0300641	DS_vs_WT	Sp1	0.00014125	TRUE	Inhibitory_neuroblast	0.87951	0.686963	SVZ
1.83189e-06	-0.168761	0.034	0.069	0.000917779	DS_vs_WT	Casp3	5.72e-06	TRUE	Inhibitory_neuroblast	0.423217	0.266103	SVZ
0.00051823	-0.175526	0.037	0.066	0.259633	DS_vs_WT	Rad50	0.00101653	TRUE	Inhibitory_neuroblast	0.423096	0.260073	SVZ
2.09165e-06	-0.198201	0.039	0.078	0.00104792	DS_vs_WT	Braf	6.27495e-06	TRUE	Inhibitory_neuroblast	0.494305	0.302491	SVZ
6.36839e-07	-0.198372	0.031	0.068	0.000319057	DS_vs_WT	Slc1a3	2.21446e-06	TRUE	Inhibitory_neuroblast	0.433618	0.249446	SVZ
5.10717e-07	-0.207129	0.055	0.102	0.000255869	DS_vs_WT	Atf6	1.8172e-06	TRUE	Inhibitory_neuroblast	0.637527	0.418523	SVZ
9.40097e-13	-0.210148	0.067	0.131	4.70989e-10	DS_vs_WT	Itch	6.84928e-12	TRUE	Inhibitory_neuroblast	0.788768	0.546298	SVZ
2.33174e-06	-0.216864	0.035	0.074	0.0011682	DS_vs_WT	Smurf2	6.86068e-06	TRUE	Inhibitory_neuroblast	0.464959	0.2605	SVZ
1.21707e-11	-0.216891	0.091	0.162	6.09752e-09	DS_vs_WT	Crebbp	8.09616e-11	TRUE	Inhibitory_neuroblast	1.03266	0.748932	SVZ
3.18583e-07	-0.232149	0.138	0.206	0.00015961	DS_vs_WT	Mki67	1.18886e-06	TRUE	Inhibitory_neuroblast	2.02072	1.57174	SVZ
9.3067e-11	-0.235449	0.129	0.208	4.66266e-08	DS_vs_WT	Arf1	5.6957e-10	TRUE	Inhibitory_neuroblast	1.57947	1.19106	SVZ
6.19898e-10	-0.239469	0.026	0.072	3.10569e-07	DS_vs_WT	Trp53bp1	3.2705e-09	TRUE	Inhibitory_neuroblast	0.435515	0.215963	SVZ
7.57778e-08	-0.24065	0.052	0.103	3.79647e-05	DS_vs_WT	Pdia3	3.13352e-07	TRUE	Inhibitory_neuroblast	0.659657	0.404674	SVZ
5.32764e-11	-0.255228	0.039	0.094	2.66915e-08	DS_vs_WT	Gba	3.39637e-10	TRUE	Inhibitory_neuroblast	0.573493	0.318358	SVZ
8.79618e-07	-0.275535	0.054	0.103	0.000440689	DS_vs_WT	Mettl3	2.9907e-06	TRUE	Inhibitory_neuroblast	0.670889	0.380395	SVZ
1.67205e-09	-0.279073	0.129	0.208	8.37697e-07	DS_vs_WT	Fto	8.25238e-09	TRUE	Inhibitory_neuroblast	1.55907	1.10898	SVZ
9.99957e-08	-0.279486	0.049	0.099	5.00979e-05	DS_vs_WT	Ccna2	4.02614e-07	TRUE	Inhibitory_neuroblast	0.710014	0.408854	SVZ
1.56498e-10	-0.286678	0.121	0.203	7.84055e-08	DS_vs_WT	Lrp6	9.20931e-10	TRUE	Inhibitory_neuroblast	1.4236	0.986838	SVZ
4.95718e-10	-0.28993	0.144	0.23	2.48355e-07	DS_vs_WT	Mecp2	2.71616e-09	TRUE	Inhibitory_neuroblast	1.65473	1.17141	SVZ
1.202e-12	-0.295751	0.03	0.088	6.02204e-10	DS_vs_WT	Cd47	8.35939e-12	TRUE	Inhibitory_neuroblast	0.517651	0.236352	SVZ
1.60479e-17	-0.302844	0.104	0.201	8.04002e-15	DS_vs_WT	Rgs8	2.45533e-16	TRUE	Inhibitory_neuroblast	1.4	0.945567	SVZ
4.90403e-14	-0.312639	0.163	0.267	2.45692e-11	DS_vs_WT	Lamp1	3.94904e-13	TRUE	Inhibitory_neuroblast	2.158	1.54272	SVZ
2.18726e-30	-0.355643	0.124	0.263	1.09581e-27	DS_vs_WT	Ythdc1	8.36625e-29	TRUE	Inhibitory_neuroblast	1.85567	1.23176	SVZ
1.60985e-09	-0.358299	0.035	0.088	8.06536e-07	DS_vs_WT	Creb1	8.21025e-09	TRUE	Inhibitory_neuroblast	0.655323	0.29129	SVZ
7.07919e-15	-0.368781	0.037	0.107	3.54668e-12	DS_vs_WT	Mapk1	6.01732e-14	TRUE	Inhibitory_neuroblast	0.66455	0.289089	SVZ
2.05106e-15	-0.380021	0.058	0.139	1.02758e-12	DS_vs_WT	Jak2	2.09208e-14	TRUE	Inhibitory_neuroblast	0.920103	0.475458	SVZ
1.02145e-16	-0.382893	0.296	0.439	5.11748e-14	DS_vs_WT	Apc	1.20217e-15	TRUE	Inhibitory_neuroblast	3.98622	2.82392	SVZ
8.61483e-17	-0.388191	0.106	0.208	4.31603e-14	DS_vs_WT	Rac1	1.09839e-15	TRUE	Inhibitory_neuroblast	1.59831	0.985333	SVZ
9.14223e-19	-0.412827	0.034	0.114	4.58026e-16	DS_vs_WT	Csnk1a1	1.55418e-17	TRUE	Inhibitory_neuroblast	0.698237	0.275631	SVZ
8.73308e-16	-0.42188	0.318	0.46	4.37527e-13	DS_vs_WT	Fabp7	9.54401e-15	TRUE	Inhibitory_neuroblast	5.83938	4.10527	SVZ
1.82763e-17	-0.475396	0.071	0.169	9.15643e-15	DS_vs_WT	Nras	2.54207e-16	TRUE	Inhibitory_neuroblast	1.22136	0.597756	SVZ
1.94045e-28	-0.571062	0.018	0.113	9.72166e-26	DS_vs_WT	Ogt	5.93778e-27	TRUE	Inhibitory_neuroblast	0.67806	0.129538	SVZ
3.62217e-21	-0.658224	0.077	0.193	1.81471e-18	DS_vs_WT	Vcan	6.92741e-20	TRUE	Inhibitory_neuroblast	1.55334	0.617941	SVZ
1.04526e-30	-0.712564	0.183	0.366	5.23676e-28	DS_vs_WT	Dcx	5.33084e-29	TRUE	Inhibitory_neuroblast	3.92781	2.00712	SVZ
8.04857e-27	-0.735419	0.132	0.289	4.03233e-24	DS_vs_WT	Hsp90b1	2.05239e-25	TRUE	Inhibitory_neuroblast	2.62651	1.17824	SVZ
2.99002e-43	-0.967619	0.032	0.18	1.498e-40	DS_vs_WT	Map2	4.57472e-41	TRUE	Inhibitory_neuroblast	1.45941	0.257616	SVZ
p_val	avg_log2FC	pct.1	pct.2	p_val_adj	comparison	gene	FDR	sig	celltype	exp.1	exp.2	SVZ
0.000352009	0.533485	0.308	0.199	0.176356	DS_vs_WT	Igfbp2	0.00302727	TRUE	Cnr1	0.812166	1.62297	SVZ
1.79908e-05	0.52044	0.597	0.542	0.00901338	DS_vs_WT	Dvl1	0.000244101	TRUE	Cnr1	3.50227	5.45802	SVZ
0.00656319	0.473898	0.156	0.107	1	DS_vs_WT	Mdga1	0.0300231	TRUE	Cnr1	0.433906	0.991491	SVZ
1.64846e-05	0.42152	0.852	0.792	0.00825877	DS_vs_WT	Ncan	0.000244101	TRUE	Cnr1	10.2048	14.007	SVZ
0.0134009	0.416478	0.167	0.125	1	DS_vs_WT	Ldlr	0.0523852	FALSE	Cnr1	0.475351	0.969099	SVZ
0.000757042	0.41379	0.228	0.194	0.379278	DS_vs_WT	Anxa6	0.00542547	TRUE	Cnr1	0.662632	1.21493	SVZ
0.0375784	0.390262	0.24	0.174	1	DS_vs_WT	Optn	0.106307	FALSE	Cnr1	0.794635	1.3521	SVZ
0.0237671	0.388045	0.373	0.301	1	DS_vs_WT	Vars	0.0754599	FALSE	Cnr1	1.59368	2.39414	SVZ
0.0270134	0.385605	0.285	0.245	1	DS_vs_WT	Clu	0.0817785	FALSE	Cnr1	1.22954	1.91268	SVZ
0.0400252	0.383188	0.266	0.196	1	DS_vs_WT	Aldh1l1	0.110192	FALSE	Cnr1	1.01201	1.62411	SVZ
0.00422717	0.361156	0.091	0.043	1	DS_vs_WT	Bcan	0.0233036	TRUE	Cnr1	0.121311	0.440273	SVZ
2.28575e-06	0.35827	0.791	0.781	0.00114516	DS_vs_WT	Lrp1	4.91435e-05	TRUE	Cnr1	7.45069	9.83284	SVZ
0.0404893	0.348591	0.175	0.121	1	DS_vs_WT	Mdk	0.110192	FALSE	Cnr1	0.487664	0.894267	SVZ
0.00507409	0.348116	0.312	0.301	1	DS_vs_WT	Pou3f3	0.026608	TRUE	Cnr1	1.26298	1.88054	SVZ
0.0606658	0.327566	0.152	0.114	1	DS_vs_WT	Fbln1	0.149921	FALSE	Cnr1	0.465354	0.838864	SVZ
0.00654386	0.323434	0.221	0.223	1	DS_vs_WT	Cux1	0.0300231	TRUE	Cnr1	0.905653	1.38455	SVZ
8.54314e-06	0.309049	0.734	0.768	0.00428011	DS_vs_WT	Nlgn2	0.000153065	TRUE	Cnr1	7.14645	9.09256	SVZ
0.00581541	0.300613	0.24	0.147	1	DS_vs_WT	Grip1	0.0284162	TRUE	Cnr1	0.739863	1.14293	SVZ
0.0262029	0.298326	0.08	0.042	1	DS_vs_WT	Sorl1	0.0804802	FALSE	Cnr1	0.13977	0.401594	SVZ
0.0118752	0.295267	0.133	0.069	1	DS_vs_WT	Dkk3	0.0478866	TRUE	Cnr1	0.232492	0.512406	SVZ
0.0952998	0.286087	0.125	0.08	1	DS_vs_WT	Foxo1	0.202866	FALSE	Cnr1	0.367402	0.667312	SVZ
0.125499	0.280595	0.099	0.069	1	DS_vs_WT	Tnc	0.240914	FALSE	Cnr1	0.276332	0.550356	SVZ
0.0200558	0.279533	0.091	0.045	1	DS_vs_WT	Kif7	0.0688911	FALSE	Cnr1	0.137844	0.381118	SVZ
0.123834	0.279464	0.179	0.13	1	DS_vs_WT	Qars	0.239858	FALSE	Cnr1	0.547843	0.878685	SVZ
0.00475073	0.279025	0.065	0.027	1	DS_vs_WT	Cldn5	0.0255352	TRUE	Cnr1	0.0551851	0.280334	SVZ
0.00355087	0.275008	0.08	0.029	1	DS_vs_WT	Olig2	0.0200905	TRUE	Cnr1	0.0683729	0.292732	SVZ
0.00614381	0.269311	0.954	0.947	1	DS_vs_WT	App	0.0293537	TRUE	Cnr1	25.7659	31.2591	SVZ
0.0474475	0.267121	0.125	0.072	1	DS_vs_WT	Cnp	0.122484	FALSE	Cnr1	0.284556	0.545839	SVZ
0.0647088	0.258883	0.262	0.254	1	DS_vs_WT	Grin1	0.154582	FALSE	Cnr1	1.23601	1.6755	SVZ
0.168016	0.252628	0.224	0.19	1	DS_vs_WT	Vars2	0.280027	FALSE	Cnr1	0.724726	1.0548	SVZ
0.0357447	0.251267	0.376	0.37	1	DS_vs_WT	Rcan1	0.102468	FALSE	Cnr1	2.05382	2.63482	SVZ
0.221267	0.247914	0.243	0.252	1	DS_vs_WT	Foxj1	0.342797	FALSE	Cnr1	1.60827	2.0973	SVZ
0.00679516	0.212252	0.342	0.368	1	DS_vs_WT	Traf3	0.0304367	TRUE	Cnr1	1.69292	2.11973	SVZ
0.0417229	0.209923	0.125	0.071	1	DS_vs_WT	Fbln2	0.110746	FALSE	Cnr1	0.286942	0.488511	SVZ
0.329472	0.197539	0.141	0.12	1	DS_vs_WT	Mx1	0.472243	FALSE	Cnr1	0.49941	0.719434	SVZ
0.0734191	0.181686	0.061	0.027	1	DS_vs_WT	Npc2	0.170173	FALSE	Cnr1	0.101239	0.249034	SVZ
0.123303	0.174875	0.125	0.08	1	DS_vs_WT	Fzd8	0.239858	FALSE	Cnr1	0.276958	0.441515	SVZ
0.151387	0.174191	0.057	0.049	1	DS_vs_WT	Irf3	0.269976	FALSE	Cnr1	0.158514	0.307188	SVZ
0.448747	0.170571	0.278	0.254	1	DS_vs_WT	Tle1	0.599258	FALSE	Cnr1	1.17845	1.45185	SVZ
0.513097	0.163438	0.441	0.422	1	DS_vs_WT	Gabbr1	0.646419	FALSE	Cnr1	2.57998	3.00941	SVZ
0.0149918	0.159672	0.053	0.016	1	DS_vs_WT	Psmb5	0.0565479	FALSE	Cnr1	0.0754994	0.201368	SVZ
0.0120273	0.158861	0.103	0.049	1	DS_vs_WT	Alkbh5	0.0478866	TRUE	Cnr1	0.223416	0.365828	SVZ
0.16564	0.149477	0.376	0.395	1	DS_vs_WT	Aars	0.280027	FALSE	Cnr1	2.14626	2.48973	SVZ
0.580657	0.145861	0.167	0.158	1	DS_vs_WT	Prdx5	0.717478	FALSE	Cnr1	0.680225	0.858985	SVZ
0.678479	0.144592	0.163	0.147	1	DS_vs_WT	Nfkb1	0.80369	FALSE	Cnr1	0.732584	0.91523	SVZ
0.0218337	0.138662	0.057	0.02	1	DS_vs_WT	Nr4a2	0.0725699	FALSE	Cnr1	0.0797376	0.188666	SVZ
0.473053	0.135711	0.118	0.112	1	DS_vs_WT	Myc	0.620161	FALSE	Cnr1	0.490399	0.637403	SVZ
0.437794	0.133101	0.068	0.051	1	DS_vs_WT	Gsr	0.591803	FALSE	Cnr1	0.173252	0.286645	SVZ
0.566197	0.129158	0.144	0.118	1	DS_vs_WT	Sall1	0.703656	FALSE	Cnr1	0.610849	0.761714	SVZ
0.655951	0.12798	0.274	0.25	1	DS_vs_WT	Ikbkb	0.796777	FALSE	Cnr1	1.10177	1.29673	SVZ
0.0869539	0.124982	0.057	0.025	1	DS_vs_WT	Ifnar2	0.192733	FALSE	Cnr1	0.0871916	0.185576	SVZ
0.673938	0.124606	0.319	0.292	1	DS_vs_WT	Arx	0.80369	FALSE	Cnr1	1.70038	1.94398	SVZ
0.480679	0.122949	0.198	0.163	1	DS_vs_WT	Sp8	0.622566	FALSE	Cnr1	0.765266	0.922301	SVZ
0.514128	0.11809	0.141	0.112	1	DS_vs_WT	Notch1	0.646419	FALSE	Cnr1	0.430682	0.552714	SVZ
0.184504	0.116808	0.35	0.366	1	DS_vs_WT	Smurf1	0.302395	FALSE	Cnr1	1.86919	2.11116	SVZ
0.0736098	0.113861	0.125	0.145	1	DS_vs_WT	Rnf5	0.170173	FALSE	Cnr1	0.611891	0.744261	SVZ
0.735619	0.10774	0.19	0.172	1	DS_vs_WT	Cdkn1c	0.811189	FALSE	Cnr1	0.731147	0.865379	SVZ
0.699024	0.105878	0.221	0.196	1	DS_vs_WT	Psme1	0.80369	FALSE	Cnr1	0.889305	1.03317	SVZ
0.15879	0.104233	0.316	0.339	1	DS_vs_WT	Pink1	0.27312	FALSE	Cnr1	1.67837	1.87904	SVZ
0.185656	0.0989933	0.194	0.21	1	DS_vs_WT	Wnt7a	0.302395	FALSE	Cnr1	0.837249	0.967741	SVZ
0.697835	0.0958179	0.118	0.1	1	DS_vs_WT	H2afx	0.80369	FALSE	Cnr1	0.36144	0.454931	SVZ
0.114246	0.0923129	0.11	0.071	1	DS_vs_WT	Tapbp	0.227435	FALSE	Cnr1	0.313097	0.399863	SVZ
0.827004	0.0883803	0.209	0.203	1	DS_vs_WT	Hsf1	0.867346	FALSE	Cnr1	0.947032	1.07004	SVZ
0.143095	0.0863174	0.331	0.361	1	DS_vs_WT	Bcl2l2	0.263847	FALSE	Cnr1	1.72734	1.8955	SVZ
0.318938	0.0850516	0.118	0.087	1	DS_vs_WT	Trp53	0.463323	FALSE	Cnr1	0.387467	0.471722	SVZ
0.797368	0.0844109	0.16	0.152	1	DS_vs_WT	Smpd1	0.847781	FALSE	Cnr1	0.651187	0.750679	SVZ
0.857449	0.0828707	0.236	0.221	1	DS_vs_WT	Dyrk1a	0.882064	FALSE	Cnr1	1.18695	1.31625	SVZ
0.694326	0.07829	0.053	0.045	1	DS_vs_WT	Lrp5	0.80369	FALSE	Cnr1	0.156297	0.220779	SVZ
0.727011	0.0771641	0.08	0.065	1	DS_vs_WT	Gli3	0.810541	FALSE	Cnr1	0.220928	0.288009	SVZ
0.229647	0.0755641	0.049	0.058	1	DS_vs_WT	Sox5	0.346465	FALSE	Cnr1	0.185808	0.249572	SVZ
0.122121	0.0729179	0.049	0.063	1	DS_vs_WT	Traf6	0.239858	FALSE	Cnr1	0.249294	0.31406	SVZ
0.803845	0.0717639	0.144	0.145	1	DS_vs_WT	Ascl1	0.847781	FALSE	Cnr1	0.637532	0.721048	SVZ
0.289236	0.0679289	0.08	0.092	1	DS_vs_WT	Sirt1	0.423032	FALSE	Cnr1	0.398229	0.465639	SVZ
0.843973	0.0674137	0.099	0.091	1	DS_vs_WT	Aldh2	0.872375	FALSE	Cnr1	0.30967	0.37232	SVZ
0.488644	0.0664904	0.19	0.203	1	DS_vs_WT	Vegfa	0.629093	FALSE	Cnr1	0.830205	0.916529	SVZ
0.236586	0.0619308	0.331	0.364	1	DS_vs_WT	Rbfox3	0.353237	FALSE	Cnr1	1.91428	2.04211	SVZ
0.68404	0.0578365	0.099	0.103	1	DS_vs_WT	Dgat1	0.80369	FALSE	Cnr1	0.410357	0.468045	SVZ
0.804407	0.0561981	0.053	0.053	1	DS_vs_WT	Sod1	0.847781	FALSE	Cnr1	0.206457	0.254381	SVZ
0.802134	0.0457809	0.198	0.201	1	DS_vs_WT	Hras	0.847781	FALSE	Cnr1	0.912052	0.9737	SVZ
0.429442	0.0419678	0.049	0.06	1	DS_vs_WT	Notch3	0.588089	FALSE	Cnr1	0.200608	0.236047	SVZ
0.9273	0.0411039	0.11	0.101	1	DS_vs_WT	Mdm2	0.940422	FALSE	Cnr1	0.402059	0.44258	SVZ
0.200364	0.0303792	0.125	0.15	1	DS_vs_WT	S100a10	0.321479	FALSE	Cnr1	0.612524	0.64684	SVZ
0.965233	0.0295126	0.057	0.054	1	DS_vs_WT	Mri1	0.969743	FALSE	Cnr1	0.22911	0.254512	SVZ
0.908105	0.0233998	0.125	0.129	1	DS_vs_WT	Nrf1	0.92532	FALSE	Cnr1	0.522558	0.547454	SVZ
0.243814	0.0198021	0.3	0.337	1	DS_vs_WT	Dtx4	0.361518	FALSE	Cnr1	1.6596	1.69635	SVZ
0.223217	0.0168004	0.232	0.268	1	DS_vs_WT	Tle3	0.342797	FALSE	Cnr1	1.28106	1.30778	SVZ
0.0478542	0.0132442	0.091	0.129	1	DS_vs_WT	Notch2	0.122484	FALSE	Cnr1	0.542537	0.556763	SVZ
0.831115	0.0116344	0.319	0.332	1	DS_vs_WT	Gsk3b	0.867426	FALSE	Cnr1	1.72379	1.74585	SVZ
0.94566	0.00774038	0.068	0.063	1	DS_vs_WT	Cxcl13	0.95454	FALSE	Cnr1	0.288496	0.295427	SVZ
0.836854	0.00740602	0.053	0.045	1	DS_vs_WT	Fuca1	0.869197	FALSE	Cnr1	0.17917	0.185238	SVZ
0.709762	0.00679604	0.487	0.507	1	DS_vs_WT	Lmnb1	0.807401	FALSE	Cnr1	3.54654	3.56801	SVZ
0.130605	0.00526708	0.928	0.886	1	DS_vs_WT	Tubb3	0.248495	FALSE	Cnr1	21.7626	21.8459	SVZ
0.00871868	0.0032293	0.08	0.125	1	DS_vs_WT	Slc1a3	0.0367552	FALSE	Cnr1	0.426523	0.42972	SVZ
1	0	1	1	1	DS_vs_WT	Unnamed: 0	1	FALSE	Cnr1	1.12999e-177	1.25939e-178	SVZ
0.68108	-8.13336e-05	0.11	0.125	1	DS_vs_WT	Atrip	0.80369	FALSE	Cnr1	0.544519	0.544432	SVZ
0.000439954	-0.00715541	0.224	0.317	0.220417	DS_vs_WT	Arf1	0.00337822	FALSE	Cnr1	1.60685	1.59395	SVZ
0.783939	-0.0105112	0.053	0.047	1	DS_vs_WT	Aars2	0.842735	FALSE	Cnr1	0.154841	0.146457	SVZ
0.708247	-0.0197805	0.118	0.134	1	DS_vs_WT	Ifnar1	0.807401	FALSE	Cnr1	0.581477	0.559942	SVZ
0.0296542	-0.0283667	0.027	0.054	1	DS_vs_WT	Plin2	0.0873379	FALSE	Cnr1	0.200983	0.1776	SVZ
0.415214	-0.0307014	0.711	0.752	1	DS_vs_WT	Gad1	0.575943	FALSE	Cnr1	9.35764	9.13956	SVZ
0.530659	-0.0366918	0.072	0.092	1	DS_vs_WT	Glb1	0.663324	FALSE	Cnr1	0.330584	0.29717	SVZ
0.353896	-0.0367522	0.08	0.105	1	DS_vs_WT	Tyk2	0.503892	FALSE	Cnr1	0.423745	0.387933	SVZ
0.000387031	-0.0465383	0.065	0.127	0.193902	DS_vs_WT	Cr1l	0.00308191	FALSE	Cnr1	0.447147	0.40121	SVZ
0.62635	-0.0538293	0.091	0.087	1	DS_vs_WT	Mki67	0.769516	FALSE	Cnr1	0.388667	0.337808	SVZ
0.167352	-0.0580964	0.532	0.596	1	DS_vs_WT	Mtor	0.280027	FALSE	Cnr1	4.09784	3.89663	SVZ
0.773333	-0.059858	0.087	0.103	1	DS_vs_WT	Sod2	0.835511	FALSE	Cnr1	0.390972	0.334441	SVZ
0.111031	-0.0632764	0.034	0.062	1	DS_vs_WT	Txnrd3	0.224537	FALSE	Cnr1	0.274418	0.219731	SVZ
0.748773	-0.0640208	0.11	0.129	1	DS_vs_WT	Sp1	0.817189	FALSE	Cnr1	0.534368	0.467768	SVZ
0.735944	-0.0655723	0.137	0.158	1	DS_vs_WT	Pnoc	0.811189	FALSE	Cnr1	0.69221	0.617018	SVZ
0.150913	-0.0671914	0.03	0.056	1	DS_vs_WT	Gabra1	0.269976	FALSE	Cnr1	0.227433	0.171578	SVZ
0.727602	-0.0681691	0.103	0.101	1	DS_vs_WT	Cd68	0.810541	FALSE	Cnr1	0.429912	0.363918	SVZ
0.739503	-0.0709838	0.042	0.054	1	DS_vs_WT	Syt9	0.811189	FALSE	Cnr1	0.253929	0.193726	SVZ
0.455053	-0.0712132	0.038	0.058	1	DS_vs_WT	Irf2	0.600224	FALSE	Cnr1	0.198339	0.140623	SVZ
0.880603	-0.0715591	0.228	0.237	1	DS_vs_WT	Csf2ra	0.90157	FALSE	Cnr1	1.07139	0.97115	SVZ
0.0618812	-0.0752131	0.061	0.101	1	DS_vs_WT	Rars	0.151187	FALSE	Cnr1	0.430635	0.357962	SVZ
0.00227787	-0.0752893	0.038	0.091	1	DS_vs_WT	Wtap	0.0139926	FALSE	Cnr1	0.260773	0.196665	SVZ
0.109962	-0.0761343	0.072	0.109	1	DS_vs_WT	Vcan	0.224537	FALSE	Cnr1	0.476424	0.40053	SVZ
0.0427924	-0.0768642	0.046	0.083	1	DS_vs_WT	Prdx6	0.112199	FALSE	Cnr1	0.282276	0.215747	SVZ
0.649146	-0.0787249	0.183	0.179	1	DS_vs_WT	Psmb2	0.79299	FALSE	Cnr1	0.910954	0.809471	SVZ
0.698602	-0.0820939	0.144	0.141	1	DS_vs_WT	Ikbkg	0.80369	FALSE	Cnr1	0.669716	0.577356	SVZ
0.23044	-0.0823592	0.099	0.136	1	DS_vs_WT	Tbk1	0.346465	FALSE	Cnr1	0.541214	0.455695	SVZ
0.0222773	-0.0828089	0.106	0.165	1	DS_vs_WT	Crebbp	0.0725699	FALSE	Cnr1	0.540621	0.454682	SVZ
0.0763443	-0.0842195	0.046	0.083	1	DS_vs_WT	Pex1	0.174617	FALSE	Cnr1	0.310326	0.236023	SVZ
0.248568	-0.0845318	0.091	0.087	1	DS_vs_WT	Acads	0.366042	FALSE	Cnr1	0.305227	0.230947	SVZ
0.686716	-0.0872273	0.183	0.208	1	DS_vs_WT	Cdkn1a	0.80369	FALSE	Cnr1	0.921846	0.809092	SVZ
0.154451	-0.0935076	0.148	0.197	1	DS_vs_WT	Plk3	0.269976	FALSE	Cnr1	0.862999	0.746079	SVZ
0.51391	-0.0945815	0.433	0.476	1	DS_vs_WT	Ep300	0.646419	FALSE	Cnr1	2.9588	2.70759	SVZ
0.492095	-0.09553	0.498	0.489	1	DS_vs_WT	Ctnnb1	0.629764	FALSE	Cnr1	4.30104	3.96139	SVZ
0.0201867	-0.0980095	0.821	0.893	1	DS_vs_WT	Gria1	0.0688911	FALSE	Cnr1	15.9011	14.7911	SVZ
0.696361	-0.099203	0.053	0.067	1	DS_vs_WT	Gli2	0.80369	FALSE	Cnr1	0.290498	0.204743	SVZ
0.720831	-0.101812	0.125	0.145	1	DS_vs_WT	Sirt5	0.810541	FALSE	Cnr1	0.623438	0.51282	SVZ
0.763551	-0.104628	0.487	0.507	1	DS_vs_WT	Fabp7	0.829108	FALSE	Cnr1	5.06138	4.63736	SVZ
0.0853043	-0.104758	0.042	0.076	1	DS_vs_WT	Topbp1	0.191046	FALSE	Cnr1	0.332302	0.238989	SVZ
0.717779	-0.111931	0.163	0.185	1	DS_vs_WT	Ythdf1	0.810541	FALSE	Cnr1	0.867878	0.728438	SVZ
0.144809	-0.118831	0.281	0.344	1	DS_vs_WT	Syn1	0.263847	FALSE	Cnr1	1.98804	1.75179	SVZ
0.0052185	-0.119239	0.308	0.409	1	DS_vs_WT	Grin2b	0.0267137	TRUE	Cnr1	2.7274	2.43171	SVZ
0.398912	-0.120109	0.068	0.074	1	DS_vs_WT	Sirt3	0.556923	FALSE	Cnr1	0.288715	0.185771	SVZ
0.479581	-0.1202	0.057	0.08	1	DS_vs_WT	Axin1	0.622566	FALSE	Cnr1	0.324803	0.218898	SVZ
0.0901453	-0.121536	0.057	0.098	1	DS_vs_WT	Aldh9a1	0.197768	FALSE	Cnr1	0.407348	0.293646	SVZ
0.166972	-0.130124	0.148	0.199	1	DS_vs_WT	Npc1	0.280027	FALSE	Cnr1	0.881471	0.7192	SVZ
0.102152	-0.132065	0.125	0.179	1	DS_vs_WT	Zhx2	0.21323	FALSE	Cnr1	0.724403	0.57356	SVZ
0.1438	-0.135544	0.027	0.056	1	DS_vs_WT	Ccna2	0.263847	FALSE	Cnr1	0.193558	0.0865275	SVZ
0.440411	-0.137435	0.068	0.094	1	DS_vs_WT	Rfx5	0.591803	FALSE	Cnr1	0.393327	0.266721	SVZ
0.00280644	-0.137736	0.205	0.304	1	DS_vs_WT	Axin2	0.0167607	TRUE	Cnr1	1.4103	1.19083	SVZ
0.325926	-0.140641	0.068	0.1	1	DS_vs_WT	Sufu	0.470296	FALSE	Cnr1	0.377653	0.249691	SVZ
0.048676	-0.141694	0.129	0.192	1	DS_vs_WT	Cpt1c	0.123122	FALSE	Cnr1	0.784544	0.617608	SVZ
0.0273863	-0.144498	0.369	0.462	1	DS_vs_WT	Lamp1	0.0817785	FALSE	Cnr1	3.17967	2.78133	SVZ
0.0944249	-0.144605	0.156	0.216	1	DS_vs_WT	Gria4	0.202866	FALSE	Cnr1	1.08493	0.886081	SVZ
0.45426	-0.149566	0.042	0.054	1	DS_vs_WT	Tgfb2	0.600224	FALSE	Cnr1	0.247896	0.125005	SVZ
0.0415384	-0.149939	0.038	0.082	1	DS_vs_WT	Gstm1	0.110746	FALSE	Cnr1	0.293066	0.165426	SVZ
0.139018	-0.151993	0.027	0.054	1	DS_vs_WT	Rad9a	0.262183	FALSE	Cnr1	0.186496	0.0678545	SVZ
0.10727	-0.154059	0.232	0.299	1	DS_vs_WT	Sars	0.221761	FALSE	Cnr1	1.60098	1.33755	SVZ
0.0244074	-0.154059	0.053	0.103	1	DS_vs_WT	Smurf2	0.0760519	FALSE	Cnr1	0.411431	0.268479	SVZ
0.00797393	-0.157731	0.084	0.15	1	DS_vs_WT	Fgfr2	0.0349876	TRUE	Cnr1	0.661919	0.4898	SVZ
1.81657e-05	-0.158975	0.205	0.337	0.009101	DS_vs_WT	Fto	0.000244101	TRUE	Cnr1	1.76039	1.47238	SVZ
0.180112	-0.160105	0.418	0.487	1	DS_vs_WT	Pld3	0.297878	FALSE	Cnr1	3.06009	2.63362	SVZ
0.215093	-0.16248	0.51	0.574	1	DS_vs_WT	Eif4g1	0.340037	FALSE	Cnr1	4.45927	3.87779	SVZ
0.436233	-0.163042	0.11	0.129	1	DS_vs_WT	Mavs	0.591803	FALSE	Cnr1	0.57874	0.410035	SVZ
0.2118	-0.163288	0.027	0.053	1	DS_vs_WT	Egfr	0.33731	FALSE	Cnr1	0.29457	0.156035	SVZ
0.0195839	-0.172091	0.171	0.25	1	DS_vs_WT	Rac1	0.0688911	FALSE	Cnr1	1.2893	1.03188	SVZ
0.0238664	-0.180055	0.232	0.319	1	DS_vs_WT	Mapk14	0.0754599	FALSE	Cnr1	1.54698	1.24814	SVZ
0.00920764	-0.183359	0.034	0.085	1	DS_vs_WT	Galc	0.0380701	TRUE	Cnr1	0.361861	0.199323	SVZ
0.41933	-0.18352	0.125	0.132	1	DS_vs_WT	Gsto1	0.577922	FALSE	Cnr1	0.665323	0.466404	SVZ
0.377574	-0.185736	0.114	0.139	1	DS_vs_WT	Gpx1	0.530578	FALSE	Cnr1	0.581551	0.3905	SVZ
0.229288	-0.186556	0.243	0.301	1	DS_vs_WT	Psen1	0.346465	FALSE	Cnr1	1.62968	1.3107	SVZ
0.0183518	-0.187329	0.057	0.112	1	DS_vs_WT	Unc5d	0.0657606	FALSE	Cnr1	0.510877	0.326898	SVZ
0.373146	-0.188625	0.144	0.167	1	DS_vs_WT	Ptch1	0.527805	FALSE	Cnr1	0.764156	0.547944	SVZ
0.0387774	-0.194857	0.076	0.134	1	DS_vs_WT	Wars	0.108275	FALSE	Cnr1	0.529612	0.33636	SVZ
0.152233	-0.195536	0.076	0.12	1	DS_vs_WT	Ggt7	0.269976	FALSE	Cnr1	0.540391	0.345144	SVZ
0.111746	-0.197852	0.034	0.069	1	DS_vs_WT	Nbn	0.224537	FALSE	Cnr1	0.302399	0.135494	SVZ
0.0635989	-0.201161	0.057	0.105	1	DS_vs_WT	Rad50	0.153638	FALSE	Cnr1	0.471182	0.279708	SVZ
0.0035432	-0.203446	0.023	0.072	1	DS_vs_WT	Cntn6	0.0200905	TRUE	Cnr1	0.337042	0.161186	SVZ
0.144178	-0.20649	0.087	0.134	1	DS_vs_WT	Atf6	0.263847	FALSE	Cnr1	0.646658	0.427065	SVZ
0.0149886	-0.22194	0.274	0.373	1	DS_vs_WT	Dlg4	0.0565479	FALSE	Cnr1	2.03196	1.59964	SVZ
0.157255	-0.223195	0.072	0.092	1	DS_vs_WT	Gusb	0.272661	FALSE	Cnr1	0.385473	0.186888	SVZ
0.222829	-0.224414	0.221	0.274	1	DS_vs_WT	Lrp6	0.342797	FALSE	Cnr1	1.39026	1.04592	SVZ
0.0667468	-0.235693	0.129	0.194	1	DS_vs_WT	Otud4	0.157698	FALSE	Cnr1	0.856293	0.576507	SVZ
0.0947032	-0.243187	0.038	0.065	1	DS_vs_WT	Creb1	0.202866	FALSE	Cnr1	0.305387	0.102891	SVZ
0.0538254	-0.24433	0.376	0.466	1	DS_vs_WT	Txnrd1	0.134563	FALSE	Cnr1	2.97707	2.35748	SVZ
0.0353847	-0.245511	0.087	0.15	1	DS_vs_WT	Mettl3	0.102468	FALSE	Cnr1	0.673191	0.411365	SVZ
0.000132595	-0.246114	0.095	0.194	0.06643	DS_vs_WT	Itch	0.00132441	TRUE	Cnr1	0.84398	0.554779	SVZ
0.000692511	-0.24658	0.247	0.371	0.346948	DS_vs_WT	Jak1	0.00513414	TRUE	Cnr1	2.11572	1.62622	SVZ
0.218917	-0.252427	0.243	0.293	1	DS_vs_WT	Tle4	0.342797	FALSE	Cnr1	1.64261	1.21842	SVZ
0.0084336	-0.256715	0.015	0.058	1	DS_vs_WT	Ythdf2	0.0362645	TRUE	Cnr1	0.250514	0.04667	SVZ
0.153406	-0.263384	0.084	0.127	1	DS_vs_WT	Gfap	0.269976	FALSE	Cnr1	0.64635	0.371626	SVZ
0.187216	-0.280516	0.338	0.393	1	DS_vs_WT	Cnr1	0.302642	FALSE	Cnr1	2.99359	2.28791	SVZ
0.000379881	-0.286567	0.878	0.944	0.19032	DS_vs_WT	Mapt	0.00308191	TRUE	Cnr1	18.5351	15.0159	SVZ
0.00540833	-0.290345	0.106	0.192	1	DS_vs_WT	Hif1a	0.0270416	TRUE	Cnr1	0.923174	0.572592	SVZ
0.0964756	-0.304217	0.095	0.127	1	DS_vs_WT	Gba	0.203355	FALSE	Cnr1	0.574383	0.275064	SVZ
0.0166346	-0.305702	0.019	0.06	1	DS_vs_WT	Lamp2	0.0616629	FALSE	Cnr1	0.326404	0.0731249	SVZ
0.000954734	-0.313362	0.034	0.105	0.478322	DS_vs_WT	Prkaa1	0.00641462	TRUE	Cnr1	0.462175	0.176706	SVZ
0.0836792	-0.323712	0.373	0.415	1	DS_vs_WT	Gad2	0.189379	FALSE	Cnr1	2.86887	2.09127	SVZ
0.0175454	-0.326023	0.042	0.091	1	DS_vs_WT	Reln	0.0639365	FALSE	Cnr1	0.43319	0.143302	SVZ
0.00134695	-0.334189	0.513	0.645	0.674821	DS_vs_WT	Apc	0.00877557	TRUE	Cnr1	5.36129	4.04596	SVZ
1.38947e-05	-0.336385	0.049	0.15	0.00696123	DS_vs_WT	Casp3	0.000229797	TRUE	Cnr1	0.643751	0.30189	SVZ
0.00090122	-0.362143	0.065	0.152	0.451511	DS_vs_WT	Braf	0.00625039	TRUE	Cnr1	0.695372	0.319013	SVZ
2.31474e-05	-0.377197	0.008	0.072	0.0115969	DS_vs_WT	Kras	0.000292747	TRUE	Cnr1	0.382811	0.0646704	SVZ
5.22089e-06	-0.38444	0.171	0.326	0.00261566	DS_vs_WT	Ythdc1	0.000102045	TRUE	Cnr1	1.60903	0.998716	SVZ
0.0220026	-0.398155	0.049	0.105	1	DS_vs_WT	Lhx6	0.0725699	FALSE	Cnr1	0.914723	0.452946	SVZ
0.000204354	-0.403031	0.076	0.178	0.102382	DS_vs_WT	Trp53bp1	0.00191027	TRUE	Cnr1	0.936609	0.464595	SVZ
7.54843e-05	-0.46057	0.087	0.203	0.0378177	DS_vs_WT	Nras	0.000811457	TRUE	Cnr1	1.01762	0.4662	SVZ
2.335e-07	-0.472145	0.015	0.116	0.000116983	DS_vs_WT	Ogt	7.3099e-06	TRUE	Cnr1	0.487628	0.0724189	SVZ
4.06369e-05	-0.487117	0.106	0.234	0.0203591	DS_vs_WT	Jak2	0.000459839	TRUE	Cnr1	1.20187	0.57092	SVZ
1.15664e-06	-0.508548	0.076	0.214	0.000579477	DS_vs_WT	Cux2	2.76308e-05	TRUE	Cnr1	0.982491	0.393551	SVZ
0.0014724	-0.519227	0.217	0.326	0.737671	DS_vs_WT	Mecp2	0.00931075	TRUE	Cnr1	1.73164	0.905993	SVZ
0.000135521	-0.587404	0.125	0.243	0.0678961	DS_vs_WT	Pdia3	0.00132441	TRUE	Cnr1	1.28702	0.522101	SVZ
0.000229575	-0.606422	0.156	0.277	0.115017	DS_vs_WT	Nlgn1	0.00205661	TRUE	Cnr1	1.70187	0.774653	SVZ
4.96973e-07	-0.636512	0.259	0.451	0.000248983	DS_vs_WT	Tnr	1.33561e-05	TRUE	Cnr1	3.32774	1.78389	SVZ
9.20248e-08	-0.645496	0.03	0.149	4.61044e-05	DS_vs_WT	Csnk1a1	3.95707e-06	TRUE	Cnr1	0.694328	0.0831383	SVZ
7.6658e-09	-0.68182	0.103	0.284	3.84057e-06	DS_vs_WT	Cd47	4.52452e-07	TRUE	Cnr1	1.43725	0.51933	SVZ
3.69232e-05	-0.691462	0.129	0.241	0.0184985	DS_vs_WT	Cx3cl1	0.000441028	TRUE	Cnr1	1.36343	0.463499	SVZ
2.37997e-07	-0.69779	0.106	0.266	0.000119236	DS_vs_WT	Mapk1	7.3099e-06	TRUE	Cnr1	1.38187	0.468458	SVZ
8.41771e-09	-0.835422	0.152	0.35	4.21727e-06	DS_vs_WT	Dcx	4.52452e-07	TRUE	Cnr1	2.62841	1.03343	SVZ
4.27403e-11	-0.910201	0.232	0.473	2.14129e-08	DS_vs_WT	Hsp90b1	9.18916e-09	TRUE	Cnr1	3.65993	1.4796	SVZ
1.08807e-09	-0.928963	0.084	0.263	5.45122e-07	DS_vs_WT	Map2	1.16967e-07	TRUE	Cnr1	1.72664	0.432131	SVZ
p_val	avg_log2FC	pct.1	pct.2	p_val_adj	comparison	gene	FDR	sig	celltype	exp.1	exp.2	SVZ
0.000313771	0.640423	0.105	0.067	0.157199	DS_vs_WT	Tnc	0.00153824	TRUE	Lhx6	0.391061	1.16837	SVZ
5.947e-06	0.531081	0.452	0.36	0.00297945	DS_vs_WT	Arx	5.69213e-05	TRUE	Lhx6	2.76053	4.43401	SVZ
2.8397e-12	0.527499	0.862	0.747	1.42269e-09	DS_vs_WT	App	1.1572e-10	TRUE	Lhx6	11.243	16.6473	SVZ
0.000380842	0.514808	0.157	0.098	0.190802	DS_vs_WT	Dkk3	0.00170109	TRUE	Lhx6	0.522157	1.17486	SVZ
0.00254186	0.459618	0.115	0.07	1	DS_vs_WT	Mdga1	0.00896339	TRUE	Lhx6	0.3981	0.922635	SVZ
2.98942e-05	0.45631	0.416	0.341	0.014977	DS_vs_WT	Dvl1	0.000222545	TRUE	Lhx6	1.98721	3.09853	SVZ
2.17515e-08	0.449836	0.494	0.482	1.08975e-05	DS_vs_WT	Pou3f3	4.37205e-07	TRUE	Lhx6	3.49182	5.13531	SVZ
0.0015129	0.420488	0.291	0.209	0.757964	DS_vs_WT	Notch1	0.00596261	TRUE	Lhx6	1.35641	2.15377	SVZ
0.00277184	0.413398	0.149	0.116	1	DS_vs_WT	H2afx	0.00960586	TRUE	Lhx6	0.606517	1.13959	SVZ
1.49309e-09	0.405276	0.808	0.786	7.48039e-07	DS_vs_WT	Ncan	5.00186e-08	TRUE	Lhx6	10.9713	14.8541	SVZ
0.00688297	0.394997	0.27	0.217	1	DS_vs_WT	Mdk	0.020638	TRUE	Lhx6	1.35202	2.09277	SVZ
0.00238301	0.375879	0.132	0.088	1	DS_vs_WT	Ikbkg	0.00870883	TRUE	Lhx6	0.407153	0.825964	SVZ
0.00914863	0.365192	0.144	0.099	1	DS_vs_WT	Acads	0.0248497	TRUE	Lhx6	0.538407	0.981549	SVZ
0.0367552	0.359586	0.264	0.212	1	DS_vs_WT	Aldh1l1	0.0703599	FALSE	Lhx6	1.72866	2.50103	SVZ
0.0526039	0.31034	0.132	0.103	1	DS_vs_WT	Notch2	0.0928031	FALSE	Lhx6	0.533988	0.902144	SVZ
0.0131639	0.310005	0.075	0.056	1	DS_vs_WT	Kif7	0.0322675	TRUE	Lhx6	0.237058	0.533596	SVZ
0.00698202	0.303405	0.082	0.045	1	DS_vs_WT	Gli3	0.020638	TRUE	Lhx6	0.192856	0.472048	SVZ
0.109122	0.299844	0.153	0.116	1	DS_vs_WT	Fbln2	0.164914	FALSE	Lhx6	0.860587	1.2904	SVZ
0.0245808	0.296872	0.356	0.319	1	DS_vs_WT	Vars	0.0503311	FALSE	Lhx6	1.88828	2.54819	SVZ
0.00294202	0.290429	0.063	0.031	1	DS_vs_WT	Satb2	0.0100228	TRUE	Lhx6	0.118653	0.368116	SVZ
0.0178888	0.287164	0.243	0.235	1	DS_vs_WT	Clu	0.0395126	TRUE	Lhx6	1.51135	2.06445	SVZ
0.000505317	0.285972	0.676	0.65	0.253164	DS_vs_WT	Lrp1	0.00216104	TRUE	Lhx6	6.2942	7.89331	SVZ
0.057615	0.285686	0.251	0.206	1	DS_vs_WT	Sall1	0.100701	FALSE	Lhx6	1.26658	1.76294	SVZ
0.0261852	0.277389	0.105	0.082	1	DS_vs_WT	Bcan	0.0521112	FALSE	Lhx6	0.379717	0.672216	SVZ
0.0101175	0.262283	0.151	0.136	1	DS_vs_WT	Igfbp2	0.026768	TRUE	Lhx6	0.633064	0.958656	SVZ
0.00634152	0.259876	0.18	0.175	1	DS_vs_WT	Dtx4	0.0199163	TRUE	Lhx6	0.94254	1.32595	SVZ
0.0101397	0.245697	0.052	0.032	1	DS_vs_WT	Rela	0.026768	TRUE	Lhx6	0.108518	0.314331	SVZ
0.0470562	0.238948	0.1	0.067	1	DS_vs_WT	Tapbp	0.0844491	FALSE	Lhx6	0.290101	0.52249	SVZ
0.02479	0.232967	0.065	0.033	1	DS_vs_WT	Fzd8	0.0503311	FALSE	Lhx6	0.173736	0.379432	SVZ
0.0526346	0.23171	0.056	0.033	1	DS_vs_WT	Col1a1	0.0928031	FALSE	Lhx6	0.144263	0.343624	SVZ
0.0175708	0.226269	0.088	0.049	1	DS_vs_WT	Alkbh5	0.0392414	TRUE	Lhx6	0.210997	0.416632	SVZ
0.0211894	0.223455	0.236	0.242	1	DS_vs_WT	Tle1	0.0443653	TRUE	Lhx6	1.42138	1.82703	SVZ
0.0121708	0.221291	0.082	0.078	1	DS_vs_WT	Sufu	0.0309663	TRUE	Lhx6	0.303817	0.51996	SVZ
0.0816178	0.211112	0.339	0.316	1	DS_vs_WT	Tle3	0.131241	FALSE	Lhx6	1.92537	2.38635	SVZ
0.011771	0.198187	0.159	0.158	1	DS_vs_WT	Ifnar1	0.0303331	TRUE	Lhx6	0.741901	0.998407	SVZ
0.0928797	0.188379	0.316	0.313	1	DS_vs_WT	Aars	0.14585	FALSE	Lhx6	1.77245	2.15916	SVZ
0.10695	0.183739	0.339	0.336	1	DS_vs_WT	Pink1	0.162855	FALSE	Lhx6	2.02587	2.43685	SVZ
0.117421	0.1787	0.092	0.085	1	DS_vs_WT	Cnp	0.172275	FALSE	Lhx6	0.358934	0.538128	SVZ
0.095686	0.177242	0.128	0.122	1	DS_vs_WT	Prdx5	0.149092	FALSE	Lhx6	0.561216	0.765298	SVZ
0.0161086	0.171188	0.559	0.565	1	DS_vs_WT	Nlgn2	0.0372164	TRUE	Lhx6	4.76583	5.49224	SVZ
0.261426	0.163406	0.103	0.078	1	DS_vs_WT	Irf3	0.338659	FALSE	Lhx6	0.397333	0.564913	SVZ
0.0377544	0.156067	0.05	0.055	1	DS_vs_WT	Notch3	0.0709218	FALSE	Lhx6	0.233658	0.374598	SVZ
0.358417	0.151629	0.144	0.12	1	DS_vs_WT	Fbln1	0.431388	FALSE	Lhx6	0.573126	0.747465	SVZ
0.188485	0.151097	0.056	0.051	1	DS_vs_WT	Glb1	0.254265	FALSE	Lhx6	0.215507	0.349715	SVZ
0.473215	0.137878	0.186	0.162	1	DS_vs_WT	Hras	0.547066	FALSE	Lhx6	0.908816	1.10024	SVZ
0.446919	0.134049	0.274	0.243	1	DS_vs_WT	Ascl1	0.528416	FALSE	Lhx6	1.91374	2.19745	SVZ
0.202241	0.129418	0.098	0.105	1	DS_vs_WT	Grip1	0.269208	FALSE	Lhx6	0.490973	0.630904	SVZ
0.243243	0.12759	0.199	0.197	1	DS_vs_WT	Psme1	0.317479	FALSE	Lhx6	1.0076	1.19324	SVZ
0.0794483	0.126524	0.059	0.063	1	DS_vs_WT	Clspn	0.128783	FALSE	Lhx6	0.294196	0.412822	SVZ
0.182178	0.121622	0.211	0.215	1	DS_vs_WT	Dyrk1a	0.2491	FALSE	Lhx6	1.17492	1.36622	SVZ
0.521689	0.120761	0.149	0.137	1	DS_vs_WT	Lrp5	0.589098	FALSE	Lhx6	0.649048	0.793023	SVZ
0.463769	0.116142	0.063	0.049	1	DS_vs_WT	Cdkn1a	0.545132	FALSE	Lhx6	0.225505	0.328243	SVZ
0.432504	0.115717	0.577	0.564	1	DS_vs_WT	Gad1	0.516254	FALSE	Lhx6	5.80937	6.37805	SVZ
0.0194799	0.107463	0.241	0.262	1	DS_vs_WT	Bcl2l2	0.0416539	TRUE	Lhx6	1.38173	1.56592	SVZ
0.167563	0.100031	0.295	0.308	1	DS_vs_WT	Gabbr1	0.230686	FALSE	Lhx6	1.89147	2.09907	SVZ
0.0875777	0.0980971	0.232	0.253	1	DS_vs_WT	Ikbkb	0.139707	FALSE	Lhx6	1.38069	1.5482	SVZ
0.628924	0.0972417	0.121	0.115	1	DS_vs_WT	Aldh2	0.687031	FALSE	Lhx6	0.571886	0.681488	SVZ
0.0339297	0.097002	0.109	0.127	1	DS_vs_WT	Grin1	0.0655757	FALSE	Lhx6	0.647949	0.762561	SVZ
0.589678	0.0969617	0.069	0.055	1	DS_vs_WT	Sp8	0.651238	FALSE	Lhx6	0.300443	0.390848	SVZ
0.15775	0.0924156	0.113	0.119	1	DS_vs_WT	Gpx1	0.220192	FALSE	Lhx6	0.521074	0.621699	SVZ
0.466533	0.092129	0.132	0.134	1	DS_vs_WT	Vars2	0.545193	FALSE	Lhx6	0.618839	0.725589	SVZ
0.333837	0.0859226	0.565	0.523	1	DS_vs_WT	Lhx6	0.409154	FALSE	Lhx6	8.58026	9.16817	SVZ
0.345731	0.0859129	0.092	0.095	1	DS_vs_WT	Atrip	0.421163	FALSE	Lhx6	0.460534	0.550151	SVZ
0.164486	0.0848596	0.052	0.056	1	DS_vs_WT	Ggt7	0.228012	FALSE	Lhx6	0.238011	0.313016	SVZ
0.129714	0.0834847	0.199	0.212	1	DS_vs_WT	Anxa6	0.186233	FALSE	Lhx6	1.14778	1.27573	SVZ
0.144494	0.078237	0.048	0.052	1	DS_vs_WT	Txnrd3	0.205981	FALSE	Lhx6	0.196559	0.26324	SVZ
0.0456468	0.0774182	0.098	0.116	1	DS_vs_WT	Tbk1	0.0829942	FALSE	Lhx6	0.5014	0.58417	SVZ
0.808313	0.0763359	0.249	0.236	1	DS_vs_WT	Rcan1	0.850633	FALSE	Lhx6	1.38445	1.51402	SVZ
0.0256251	0.0757397	0.077	0.095	1	DS_vs_WT	Vegfa	0.0515065	FALSE	Lhx6	0.363364	0.436851	SVZ
0.504535	0.0733842	0.071	0.055	1	DS_vs_WT	Mavs	0.579494	FALSE	Lhx6	0.280388	0.347201	SVZ
0.00614777	0.066281	0.1	0.13	1	DS_vs_WT	Mettl3	0.0196143	FALSE	Lhx6	0.62246	0.698739	SVZ
0.291306	0.0643249	0.052	0.058	1	DS_vs_WT	Dgat1	0.365953	FALSE	Lhx6	0.246453	0.303285	SVZ
0.000302327	0.0552156	0.048	0.075	0.151466	DS_vs_WT	Traf6	0.00151919	FALSE	Lhx6	0.280038	0.329978	SVZ
0.0922444	0.0542258	0.274	0.304	1	DS_vs_WT	Wnt7a	0.14585	FALSE	Lhx6	1.76523	1.87115	SVZ
0.000527159	0.0528693	0.167	0.233	0.264107	DS_vs_WT	Cux2	0.00220748	FALSE	Lhx6	2.00064	2.11264	SVZ
0.0129536	0.0436703	0.211	0.252	1	DS_vs_WT	Sars	0.0321441	FALSE	Lhx6	1.35402	1.42637	SVZ
0.26284	0.039976	0.628	0.654	1	DS_vs_WT	Lmnb1	0.338659	FALSE	Lhx6	6.97972	7.20393	SVZ
0.281993	0.038147	0.103	0.116	1	DS_vs_WT	Gli2	0.356481	FALSE	Lhx6	0.604229	0.647213	SVZ
0.652513	0.0335233	0.13	0.137	1	DS_vs_WT	Rbfox3	0.708947	FALSE	Lhx6	0.729226	0.769878	SVZ
0.553033	0.0329254	0.887	0.867	1	DS_vs_WT	Tubb3	0.614142	FALSE	Lhx6	23.6778	24.2475	SVZ
0.0022335	0.0295779	0.103	0.141	1	DS_vs_WT	Ptch1	0.00847046	FALSE	Lhx6	0.688843	0.723825	SVZ
0.920542	0.0294259	0.052	0.047	1	DS_vs_WT	Tyk2	0.948867	FALSE	Lhx6	0.196182	0.22083	SVZ
0.0784289	0.0234758	0.05	0.067	1	DS_vs_WT	Ifit2	0.128783	FALSE	Lhx6	0.308191	0.329652	SVZ
0.974837	0.0165733	0.05	0.047	1	DS_vs_WT	Plk3	0.989607	FALSE	Lhx6	0.230986	0.245209	SVZ
0.98227	0.013631	0.211	0.211	1	DS_vs_WT	Pld3	0.991215	FALSE	Lhx6	1.19107	1.21187	SVZ
0.986283	0.0125855	0.069	0.069	1	DS_vs_WT	Mx1	0.991215	FALSE	Lhx6	0.315691	0.327219	SVZ
0.79594	0.0100062	0.119	0.127	1	DS_vs_WT	Nfkb1	0.842021	FALSE	Lhx6	0.595677	0.606783	SVZ
0.473579	0.00987078	0.174	0.19	1	DS_vs_WT	Hsf1	0.547066	FALSE	Lhx6	0.968398	0.981912	SVZ
0.111387	0.00788754	0.211	0.242	1	DS_vs_WT	Traf3	0.16708	FALSE	Lhx6	1.36089	1.37383	SVZ
0.315468	0.00640345	0.387	0.414	1	DS_vs_WT	Ep300	0.389013	FALSE	Lhx6	2.79971	2.81662	SVZ
0.664269	0.00397094	0.09	0.099	1	DS_vs_WT	Sirt5	0.71784	FALSE	Lhx6	0.442493	0.446468	SVZ
0.0293407	0.0014455	0.056	0.081	1	DS_vs_WT	Sorl1	0.0578184	FALSE	Lhx6	0.345246	0.346594	SVZ
0.512702	0.00138312	0.157	0.173	1	DS_vs_WT	Psmb2	0.584626	FALSE	Lhx6	0.956955	0.958832	SVZ
1	0	1	1	1	DS_vs_WT	Unnamed: 0	1	FALSE	Lhx6	1.31867e-177	1.23778e-178	SVZ
0.594179	-0.00998465	0.096	0.11	1	DS_vs_WT	Smpd1	0.652623	FALSE	Lhx6	0.455512	0.445474	SVZ
0.972349	-0.010009	0.105	0.103	1	DS_vs_WT	Cdkn1c	0.989607	FALSE	Lhx6	0.5224	0.511875	SVZ
0.965002	-0.0128861	0.111	0.115	1	DS_vs_WT	Mdm2	0.989607	FALSE	Lhx6	0.620442	0.606033	SVZ
0.91935	-0.0131882	0.628	0.638	1	DS_vs_WT	Gria1	0.948867	FALSE	Lhx6	9.10932	9.01732	SVZ
0.183895	-0.0244506	0.052	0.071	1	DS_vs_WT	Cxcr4	0.24975	FALSE	Lhx6	0.351226	0.328518	SVZ
0.348581	-0.0272043	0.084	0.103	1	DS_vs_WT	Csf2ra	0.422077	FALSE	Lhx6	0.46696	0.439557	SVZ
0.831883	-0.0325525	0.086	0.095	1	DS_vs_WT	Crym	0.869702	FALSE	Lhx6	0.550247	0.51566	SVZ
0.0422099	-0.0326732	0.096	0.129	1	DS_vs_WT	Npc1	0.0778366	FALSE	Lhx6	0.614199	0.578053	SVZ
0.671397	-0.0437692	0.096	0.111	1	DS_vs_WT	Qars	0.721662	FALSE	Lhx6	0.491904	0.447322	SVZ
0.126047	-0.0480931	0.096	0.125	1	DS_vs_WT	Atf6	0.182269	FALSE	Lhx6	0.579752	0.527958	SVZ
0.779873	-0.0532045	0.107	0.102	1	DS_vs_WT	Foxj1	0.8338	FALSE	Lhx6	0.745689	0.682483	SVZ
0.434064	-0.0547139	0.056	0.073	1	DS_vs_WT	Ldlr	0.516254	FALSE	Lhx6	0.313531	0.264648	SVZ
0.146351	-0.0559686	0.37	0.417	1	DS_vs_WT	Mtor	0.207158	FALSE	Lhx6	2.70004	2.55925	SVZ
0.153955	-0.0600876	0.067	0.093	1	DS_vs_WT	Sirt1	0.216399	FALSE	Lhx6	0.441859	0.383039	SVZ
0.548519	-0.0606113	0.054	0.069	1	DS_vs_WT	Cd68	0.612513	FALSE	Lhx6	0.328162	0.273519	SVZ
0.0458326	-0.0651266	0.211	0.261	1	DS_vs_WT	Psen1	0.0829942	FALSE	Lhx6	1.46958	1.36058	SVZ
0.0376135	-0.0655531	0.04	0.067	1	DS_vs_WT	Cr1l	0.0709218	FALSE	Lhx6	0.311546	0.253286	SVZ
0.529157	-0.0733945	0.088	0.106	1	DS_vs_WT	Gstm1	0.594193	FALSE	Lhx6	0.585371	0.506736	SVZ
0.00246249	-0.0841759	0.084	0.133	1	DS_vs_WT	Wars	0.00883858	FALSE	Lhx6	0.598913	0.508292	SVZ
0.277844	-0.0850725	0.067	0.09	1	DS_vs_WT	Myc	0.35346	FALSE	Lhx6	0.420215	0.33889	SVZ
0.787662	-0.0913735	0.079	0.09	1	DS_vs_WT	Sst	0.837673	FALSE	Lhx6	1.3355	1.19217	SVZ
0.0043347	-0.0931924	0.207	0.273	1	DS_vs_WT	Smurf1	0.0145213	FALSE	Lhx6	1.44565	1.29266	SVZ
0.192166	-0.09495	0.05	0.075	1	DS_vs_WT	Prkaa1	0.257502	FALSE	Lhx6	0.309163	0.225776	SVZ
0.835087	-0.104786	0.134	0.139	1	DS_vs_WT	Npy	0.869702	FALSE	Lhx6	1.53961	1.36169	SVZ
0.0172061	-0.105471	0.46	0.537	1	DS_vs_WT	Txnrd1	0.0389208	TRUE	Lhx6	4.71779	4.3147	SVZ
0.122015	-0.107084	0.077	0.11	1	DS_vs_WT	Rad50	0.177717	FALSE	Lhx6	0.483961	0.377802	SVZ
0.277133	-0.111209	0.033	0.052	1	DS_vs_WT	Ccnd1	0.35346	FALSE	Lhx6	0.268893	0.174756	SVZ
0.224475	-0.114241	0.19	0.229	1	DS_vs_WT	Cux1	0.294898	FALSE	Lhx6	1.23363	1.06358	SVZ
0.298749	-0.11473	0.061	0.084	1	DS_vs_WT	Gsto1	0.370843	FALSE	Lhx6	0.380228	0.274717	SVZ
0.078126	-0.115504	0.038	0.064	1	DS_vs_WT	Egfr	0.128783	FALSE	Lhx6	0.309265	0.20853	SVZ
0.0314481	-0.121287	0.115	0.162	1	DS_vs_WT	Rgs8	0.0613695	FALSE	Lhx6	0.758743	0.616931	SVZ
0.000237832	-0.122949	0.021	0.06	0.119154	DS_vs_WT	Lamp2	0.00125801	TRUE	Lhx6	0.240061	0.138758	SVZ
0.00793454	-0.125679	0.021	0.051	1	DS_vs_WT	Ythdc2	0.0224626	TRUE	Lhx6	0.246287	0.142313	SVZ
0.51482	-0.130773	0.109	0.127	1	DS_vs_WT	Nrf1	0.584626	FALSE	Lhx6	0.68001	0.534424	SVZ
0.0200119	-0.133194	0.05	0.088	1	DS_vs_WT	Rars	0.042341	TRUE	Lhx6	0.391868	0.26912	SVZ
0.000339497	-0.133406	0.015	0.051	0.170088	DS_vs_WT	Gabra1	0.00158695	TRUE	Lhx6	0.202842	0.0966028	SVZ
0.214804	-0.136172	0.042	0.063	1	DS_vs_WT	Gusb	0.28405	FALSE	Lhx6	0.291024	0.174742	SVZ
0.0147163	-0.139436	0.059	0.099	1	DS_vs_WT	Casp3	0.0347998	TRUE	Lhx6	0.539514	0.397685	SVZ
0.0717413	-0.144711	0.385	0.449	1	DS_vs_WT	Eif4g1	0.121176	FALSE	Lhx6	3.36038	2.94423	SVZ
0.00110985	-0.145715	0.241	0.324	0.556037	DS_vs_WT	Ythdc1	0.00449545	TRUE	Lhx6	1.95993	1.67558	SVZ
0.00841712	-0.147698	0.044	0.084	1	DS_vs_WT	Aldh9a1	0.0234978	TRUE	Lhx6	0.403743	0.267144	SVZ
0.00489153	-0.149616	0.033	0.073	1	DS_vs_WT	Rfx5	0.016118	TRUE	Lhx6	0.294861	0.167305	SVZ
0.0630358	-0.154851	0.046	0.078	1	DS_vs_WT	Nlgn1	0.108292	FALSE	Lhx6	0.394875	0.252912	SVZ
0.298888	-0.156926	0.059	0.08	1	DS_vs_WT	Cx3cl1	0.370843	FALSE	Lhx6	0.465	0.314008	SVZ
0.00714699	-0.159734	0.119	0.177	1	DS_vs_WT	Itch	0.0208195	TRUE	Lhx6	0.950002	0.745622	SVZ
0.0229246	-0.171664	0.167	0.227	1	DS_vs_WT	Hif1a	0.0475035	TRUE	Lhx6	1.23274	0.982266	SVZ
0.0726004	-0.175854	0.454	0.519	1	DS_vs_WT	Ctnnb1	0.121606	FALSE	Lhx6	5.06284	4.36709	SVZ
0.00674971	-0.177953	0.033	0.073	1	DS_vs_WT	Axin1	0.020638	TRUE	Lhx6	0.316414	0.163653	SVZ
0.000132124	-0.178569	0.303	0.409	0.066194	DS_vs_WT	Lamp1	0.000804754	TRUE	Lhx6	3.32142	2.81832	SVZ
0.0790294	-0.179545	0.031	0.058	1	DS_vs_WT	Traf2	0.128783	FALSE	Lhx6	0.301784	0.149451	SVZ
0.0408263	-0.183424	0.32	0.389	1	DS_vs_WT	Gsk3b	0.0759823	FALSE	Lhx6	2.53489	2.11286	SVZ
0.104441	-0.183638	0.077	0.113	1	DS_vs_WT	Gba	0.161481	FALSE	Lhx6	0.586624	0.396991	SVZ
0.0706646	-0.196406	0.052	0.085	1	DS_vs_WT	Fgfr2	0.120369	FALSE	Lhx6	0.404491	0.22573	SVZ
0.000334147	-0.197012	0.05	0.107	0.167408	DS_vs_WT	Topbp1	0.00158695	TRUE	Lhx6	0.521291	0.327106	SVZ
0.0102544	-0.19873	0.105	0.16	1	DS_vs_WT	Gria4	0.026768	TRUE	Lhx6	0.92653	0.678619	SVZ
0.0140699	-0.199424	0.213	0.284	1	DS_vs_WT	Mecp2	0.0340729	TRUE	Lhx6	1.68239	1.33609	SVZ
0.0146414	-0.201357	0.094	0.147	1	DS_vs_WT	Axin2	0.0347998	TRUE	Lhx6	0.770013	0.539437	SVZ
2.51293e-05	-0.203277	0.019	0.069	0.0125898	DS_vs_WT	Pex1	0.000194269	TRUE	Lhx6	0.288532	0.119187	SVZ
4.65363e-06	-0.204059	0.126	0.218	0.00233147	DS_vs_WT	Otud4	4.6769e-05	TRUE	Lhx6	1.07727	0.803289	SVZ
0.000223375	-0.204641	0.111	0.186	0.111911	DS_vs_WT	Ythdf1	0.00121347	TRUE	Lhx6	1.01426	0.747881	SVZ
0.0154273	-0.20612	0.178	0.244	1	DS_vs_WT	Mapk14	0.0360569	TRUE	Lhx6	1.3329	1.02231	SVZ
0.11566	-0.207592	0.464	0.515	1	DS_vs_WT	Gad2	0.170939	FALSE	Lhx6	4.6989	3.93514	SVZ
0.000222238	-0.213612	0.04	0.095	0.111341	DS_vs_WT	Braf	0.00121347	TRUE	Lhx6	0.435652	0.238072	SVZ
0.0189785	-0.224232	0.268	0.341	1	DS_vs_WT	Tle4	0.041018	TRUE	Lhx6	2.64726	2.12224	SVZ
0.10558	-0.234993	0.113	0.151	1	DS_vs_WT	Trp53	0.161998	FALSE	Lhx6	0.898154	0.612841	SVZ
0.00235917	-0.236237	0.192	0.275	1	DS_vs_WT	Lrp6	0.00870883	TRUE	Lhx6	1.52198	1.14105	SVZ
0.000110286	-0.236288	0.025	0.075	0.0552535	DS_vs_WT	Sox5	0.000692737	TRUE	Lhx6	0.401715	0.189953	SVZ
0.0188009	-0.23654	0.033	0.069	1	DS_vs_WT	Unc5d	0.041018	TRUE	Lhx6	0.436617	0.21937	SVZ
0.113186	-0.245759	0.09	0.116	1	DS_vs_WT	Prdx6	0.168521	FALSE	Lhx6	0.718713	0.449514	SVZ
0.00212257	-0.253866	0.128	0.2	1	DS_vs_WT	Syn1	0.00820456	TRUE	Lhx6	1.15046	0.803471	SVZ
0.00686159	-0.261858	0.038	0.079	1	DS_vs_WT	Smurf2	0.020638	TRUE	Lhx6	0.397854	0.165829	SVZ
0.0087035	-0.262015	0.044	0.084	1	DS_vs_WT	Sod2	0.0239644	TRUE	Lhx6	0.391881	0.160721	SVZ
0.0077569	-0.269997	0.634	0.67	1	DS_vs_WT	Mapt	0.0222734	TRUE	Lhx6	8.53976	6.91153	SVZ
0.000429869	-0.270115	0.142	0.227	0.215364	DS_vs_WT	Jak1	0.00187834	TRUE	Lhx6	1.24589	0.862412	SVZ
0.00534209	-0.27522	0.059	0.11	1	DS_vs_WT	Ccna2	0.0173187	TRUE	Lhx6	0.668921	0.37907	SVZ
2.28021e-05	-0.277729	0.046	0.114	0.0114239	DS_vs_WT	Creb1	0.000183329	TRUE	Lhx6	0.569338	0.294529	SVZ
0.00111827	-0.280722	0.458	0.562	0.560253	DS_vs_WT	Apc	0.00449545	TRUE	Lhx6	5.14417	4.05776	SVZ
1.16355e-05	-0.28227	0.084	0.169	0.0058294	DS_vs_WT	Mapk1	0.000101518	TRUE	Lhx6	0.796928	0.477607	SVZ
0.000372543	-0.289963	0.067	0.133	0.186644	DS_vs_WT	Slc1a3	0.00170109	TRUE	Lhx6	0.784722	0.459765	SVZ
0.0172336	-0.292775	0.107	0.159	1	DS_vs_WT	Cpt1c	0.0389208	TRUE	Lhx6	0.831351	0.494988	SVZ
0.0630304	-0.307326	0.157	0.206	1	DS_vs_WT	Mki67	0.108292	FALSE	Lhx6	1.65226	1.14339	SVZ
1.21215e-05	-0.311745	0.111	0.206	0.00607289	DS_vs_WT	Zhx2	0.000101518	TRUE	Lhx6	1.22532	0.792868	SVZ
0.000279229	-0.314931	0.439	0.554	0.139894	DS_vs_WT	Fabp7	0.0014391	TRUE	Lhx6	6.63783	5.13997	SVZ
9.51348e-05	-0.328607	0.038	0.099	0.0476625	DS_vs_WT	Wtap	0.000616842	TRUE	Lhx6	0.521698	0.211735	SVZ
0.000144988	-0.336038	0.117	0.205	0.072639	DS_vs_WT	Sp1	0.000857136	TRUE	Lhx6	1.21376	0.753772	SVZ
3.56561e-06	-0.341331	0.082	0.175	0.00178637	DS_vs_WT	Rnf5	3.77204e-05	TRUE	Lhx6	0.828138	0.442973	SVZ
0.0128106	-0.345308	0.14	0.202	1	DS_vs_WT	Cnr1	0.0321441	TRUE	Lhx6	1.53401	0.994624	SVZ
5.58754e-05	-0.353146	0.077	0.158	0.0279936	DS_vs_WT	Pdia3	0.000374365	TRUE	Lhx6	0.8742	0.467264	SVZ
4.22377e-05	-0.377725	0.136	0.235	0.0211611	DS_vs_WT	Grin2b	0.000292751	TRUE	Lhx6	1.42446	0.865987	SVZ
2.00235e-09	-0.377969	0.048	0.148	1.00318e-06	DS_vs_WT	Csnk1a1	5.03092e-08	TRUE	Lhx6	0.752464	0.348556	SVZ
1.02628e-06	-0.404924	0.1	0.208	0.000514166	DS_vs_WT	Crebbp	1.21587e-05	TRUE	Lhx6	1.04557	0.544967	SVZ
7.67559e-06	-0.415172	0.197	0.318	0.00384547	DS_vs_WT	Fto	7.01269e-05	TRUE	Lhx6	1.91435	1.18556	SVZ
1.28297e-08	-0.435593	0.048	0.149	6.42768e-06	DS_vs_WT	Trp53bp1	2.8653e-07	TRUE	Lhx6	0.707794	0.262725	SVZ
1.25589e-07	-0.439872	0.172	0.307	6.29201e-05	DS_vs_WT	Rac1	2.10362e-06	TRUE	Lhx6	1.93685	1.16505	SVZ
1.99582e-09	-0.450884	0.096	0.225	9.99905e-07	DS_vs_WT	Jak2	5.03092e-08	TRUE	Lhx6	1.22715	0.629372	SVZ
1.02835e-06	-0.458799	0.079	0.18	0.000515202	DS_vs_WT	Vcan	1.21587e-05	TRUE	Lhx6	1.06265	0.500766	SVZ
1.46189e-06	-0.460783	0.019	0.082	0.000732407	DS_vs_WT	Ptprd	1.63244e-05	TRUE	Lhx6	0.509706	0.0969397	SVZ
0.000170608	-0.467228	0.157	0.244	0.0854747	DS_vs_WT	Dlg4	0.000979778	TRUE	Lhx6	1.43568	0.761858	SVZ
3.72483e-05	-0.488914	0.142	0.243	0.0186614	DS_vs_WT	Foxo1	0.000267389	TRUE	Lhx6	1.6973	0.921993	SVZ
1.88975e-07	-0.522686	0.084	0.193	9.46767e-05	DS_vs_WT	Cd47	2.92185e-06	TRUE	Lhx6	1.12573	0.479669	SVZ
3.61624e-07	-0.525565	0.069	0.169	0.000181173	DS_vs_WT	Tnr	4.84576e-06	TRUE	Lhx6	0.998144	0.388085	SVZ
2.56729e-07	-0.526734	0.157	0.287	0.000128621	DS_vs_WT	Arf1	3.68589e-06	TRUE	Lhx6	1.77897	0.928951	SVZ
5.80764e-08	-0.545252	0.09	0.207	2.90963e-05	DS_vs_WT	Nras	1.06121e-06	TRUE	Lhx6	1.17044	0.487342	SVZ
2.8786e-12	-0.603555	0.023	0.132	1.44218e-09	DS_vs_WT	Ogt	1.1572e-10	TRUE	Lhx6	0.695476	0.115844	SVZ
7.34182e-13	-0.617688	0.215	0.412	3.67825e-10	DS_vs_WT	Hsp90b1	7.37853e-11	TRUE	Lhx6	3.1829	1.72606	SVZ
2.73694e-12	-0.821933	0.153	0.328	1.3712e-09	DS_vs_WT	Dcx	1.1572e-10	TRUE	Lhx6	2.7765	1.13631	SVZ
1.84096e-18	-0.8411	0.084	0.281	9.22319e-16	DS_vs_WT	Map2	3.70032e-16	TRUE	Lhx6	1.78473	0.554485	SVZ
p_val	avg_log2FC	pct.1	pct.2	p_val_adj	comparison	gene	FDR	sig	celltype	exp.1	exp.2	SVZ
0.000258644	1.13519	0.364	0.221	0.129581	DS_vs_WT	Tnc	0.00363736	TRUE	Microglia_1	2.37817	6.42009	SVZ
0.000800091	0.866698	0.139	0.038	0.400845	DS_vs_WT	Notch3	0.00737966	TRUE	Microglia_1	0.264706	1.30617	SVZ
0.00373691	0.802867	0.172	0.072	1	DS_vs_WT	Pdgfrb	0.0210568	TRUE	Microglia_1	0.431642	1.49759	SVZ
9.50649e-05	0.787834	0.205	0.06	0.0476275	DS_vs_WT	Fzd8	0.00195315	TRUE	Microglia_1	0.430454	1.46965	SVZ
0.00405232	0.70827	0.245	0.174	1	DS_vs_WT	Igfbp2	0.0210568	TRUE	Microglia_1	1.04552	2.34207	SVZ
0.00866385	0.672674	0.444	0.353	1	DS_vs_WT	Aldh1l1	0.0343514	TRUE	Microglia_1	4.36249	7.54793	SVZ
0.0684826	0.671407	0.079	0.03	1	DS_vs_WT	Ccn2	0.159557	FALSE	Microglia_1	0.258607	1.00449	SVZ
0.00787796	0.656249	0.245	0.123	1	DS_vs_WT	Bcan	0.0335928	TRUE	Microglia_1	0.946367	2.06743	SVZ
0.00526957	0.554089	0.318	0.298	1	DS_vs_WT	Pld3	0.0248109	TRUE	Microglia_1	2.19388	3.68939	SVZ
0.159272	0.544879	0.258	0.209	1	DS_vs_WT	Mdga1	0.272693	FALSE	Microglia_1	1.96561	3.32652	SVZ
0.078497	0.544194	0.291	0.226	1	DS_vs_WT	Dkk3	0.17058	FALSE	Microglia_1	2.18689	3.64714	SVZ
0.0734317	0.543335	0.225	0.149	1	DS_vs_WT	Gli2	0.169342	FALSE	Microglia_1	1.08223	2.03451	SVZ
0.133365	0.50889	0.079	0.043	1	DS_vs_WT	Tyk2	0.24157	FALSE	Microglia_1	0.287583	0.832172	SVZ
0.158807	0.489797	0.245	0.204	1	DS_vs_WT	Notch2	0.272693	FALSE	Microglia_1	1.80578	2.94001	SVZ
0.0744417	0.44555	0.265	0.217	1	DS_vs_WT	Lrp5	0.169938	FALSE	Microglia_1	1.42306	2.29981	SVZ
0.137098	0.437758	0.126	0.102	1	DS_vs_WT	Rbfox3	0.245906	FALSE	Microglia_1	0.60091	1.16843	SVZ
0.00831928	0.436227	0.808	0.728	1	DS_vs_WT	App	0.0341847	TRUE	Microglia_1	11.841	16.3747	SVZ
0.0165028	0.413679	0.079	0.077	1	DS_vs_WT	Nlgn1	0.0565096	FALSE	Microglia_1	0.36753	0.821658	SVZ
0.128194	0.407436	0.205	0.128	1	DS_vs_WT	Trem2	0.237474	FALSE	Microglia_1	0.957447	1.59621	SVZ
0.213427	0.404452	0.06	0.038	1	DS_vs_WT	Wnt7b	0.323721	FALSE	Microglia_1	0.260546	0.668442	SVZ
0.00245891	0.401815	0.278	0.323	1	DS_vs_WT	Dvl1	0.0154365	TRUE	Microglia_1	1.92573	2.86539	SVZ
0.16768	0.398583	0.437	0.374	1	DS_vs_WT	Notch1	0.282804	FALSE	Microglia_1	3.50434	4.93768	SVZ
0.0508377	0.362313	0.245	0.23	1	DS_vs_WT	Vars	0.124884	FALSE	Microglia_1	1.4304	2.12425	SVZ
0.00566524	0.342634	0.066	0.077	1	DS_vs_WT	Ifngr1	0.0256069	TRUE	Microglia_1	0.288014	0.633292	SVZ
0.0479485	0.341078	0.695	0.702	1	DS_vs_WT	Lrp1	0.119081	FALSE	Microglia_1	9.03572	11.7123	SVZ
0.0414587	0.321319	0.43	0.443	1	DS_vs_WT	Pou3f3	0.105277	FALSE	Microglia_1	3.84215	5.05013	SVZ
0.133612	0.306104	0.775	0.715	1	DS_vs_WT	Ncan	0.24157	FALSE	Microglia_1	13.1142	16.4503	SVZ
0.408588	0.300722	0.119	0.094	1	DS_vs_WT	Vegfa	0.498076	FALSE	Microglia_1	0.576684	0.942098	SVZ
0.492279	0.26674	0.205	0.187	1	DS_vs_WT	Zhx2	0.567628	FALSE	Microglia_1	1.51573	2.02664	SVZ
0.174025	0.241349	0.119	0.128	1	DS_vs_WT	Irf3	0.288001	FALSE	Microglia_1	0.677874	0.983411	SVZ
0.00825043	0.233236	0.172	0.213	1	DS_vs_WT	Psen1	0.0341847	TRUE	Microglia_1	1.18579	1.56932	SVZ
0.0834022	0.232676	0.093	0.106	1	DS_vs_WT	Tbk1	0.176158	FALSE	Microglia_1	0.510925	0.775355	SVZ
0.296142	0.228649	0.119	0.072	1	DS_vs_WT	Alkbh5	0.403182	FALSE	Microglia_1	0.434586	0.680957	SVZ
0.553911	0.224803	0.113	0.094	1	DS_vs_WT	Ptch1	0.619722	FALSE	Microglia_1	0.555428	0.8177	SVZ
0.2293	0.221926	0.06	0.055	1	DS_vs_WT	Cyba	0.338705	FALSE	Microglia_1	0.286711	0.500678	SVZ
0.29424	0.22125	0.258	0.251	1	DS_vs_WT	Aars	0.403182	FALSE	Microglia_1	1.53388	1.95385	SVZ
0.535836	0.213747	0.079	0.055	1	DS_vs_WT	Cdkn1c	0.605494	FALSE	Microglia_1	0.270088	0.472916	SVZ
0.505004	0.209018	0.113	0.102	1	DS_vs_WT	Csf2ra	0.579345	FALSE	Microglia_1	0.506886	0.741811	SVZ
0.36578	0.208771	0.06	0.03	1	DS_vs_WT	Satb2	0.461823	FALSE	Microglia_1	0.216438	0.405841	SVZ
0.233566	0.203367	0.132	0.14	1	DS_vs_WT	Otx1	0.342766	FALSE	Microglia_1	0.888515	1.1744	SVZ
0.0276776	0.193676	0.132	0.162	1	DS_vs_WT	Nfkb1	0.0791789	FALSE	Microglia_1	0.780489	1.0363	SVZ
0.570843	0.190952	0.053	0.043	1	DS_vs_WT	Gsr	0.632405	FALSE	Microglia_1	0.196949	0.366338	SVZ
0.403875	0.188573	0.06	0.055	1	DS_vs_WT	Kif7	0.498076	FALSE	Microglia_1	0.263046	0.439413	SVZ
0.13028	0.1802	0.371	0.4	1	DS_vs_WT	Mdk	0.239375	FALSE	Microglia_1	3.5584	4.16486	SVZ
0.661639	0.175407	0.099	0.081	1	DS_vs_WT	Smpd1	0.71205	FALSE	Microglia_1	0.387746	0.567157	SVZ
0.560285	0.170328	0.172	0.187	1	DS_vs_WT	Foxj1	0.623765	FALSE	Microglia_1	2.03442	2.41468	SVZ
0.32846	0.162504	0.417	0.345	1	DS_vs_WT	C1qb	0.4307	FALSE	Microglia_1	3.69865	4.25887	SVZ
0.22393	0.161212	0.166	0.183	1	DS_vs_WT	Dtx4	0.335154	FALSE	Microglia_1	1.24304	1.50823	SVZ
0.407825	0.152162	0.113	0.119	1	DS_vs_WT	Ikbkg	0.498076	FALSE	Microglia_1	0.67173	0.857683	SVZ
0.181128	0.136466	0.245	0.272	1	DS_vs_WT	Pink1	0.29663	FALSE	Microglia_1	1.8632	2.14725	SVZ
0.737661	0.134598	0.126	0.115	1	DS_vs_WT	Prdx6	0.786375	FALSE	Microglia_1	0.600549	0.757062	SVZ
0.115107	0.128027	0.04	0.051	1	DS_vs_WT	Tgfb1	0.220374	FALSE	Microglia_1	0.159865	0.267499	SVZ
0.801796	0.126276	0.192	0.187	1	DS_vs_WT	Gli3	0.835051	FALSE	Microglia_1	1.43754	1.66051	SVZ
0.235772	0.113809	0.093	0.111	1	DS_vs_WT	Dlg4	0.343771	FALSE	Microglia_1	0.572086	0.701125	SVZ
0.336003	0.10923	0.06	0.03	1	DS_vs_WT	Ldlr	0.433924	FALSE	Microglia_1	0.141953	0.23177	SVZ
0.417671	0.0948844	0.126	0.14	1	DS_vs_WT	Gba	0.502094	FALSE	Microglia_1	0.858971	0.985343	SVZ
0.76823	0.0944257	0.086	0.089	1	DS_vs_WT	Sufu	0.811308	FALSE	Microglia_1	0.459919	0.558669	SVZ
0.139795	0.0883647	0.126	0.157	1	DS_vs_WT	Hsf1	0.24877	FALSE	Microglia_1	0.893373	1.01297	SVZ
0.934264	0.0869568	0.06	0.051	1	DS_vs_WT	Neurod1	0.951098	FALSE	Microglia_1	0.481635	0.573685	SVZ
0.379828	0.083204	0.073	0.085	1	DS_vs_WT	Tapbp	0.476895	FALSE	Microglia_1	0.524293	0.614788	SVZ
0.454006	0.0831034	0.079	0.094	1	DS_vs_WT	Cpt1c	0.53842	FALSE	Microglia_1	0.487494	0.575693	SVZ
0.626931	0.0822796	0.053	0.06	1	DS_vs_WT	Ifnar2	0.682988	FALSE	Microglia_1	0.250376	0.32376	SVZ
0.753712	0.0759034	0.073	0.081	1	DS_vs_WT	Gstm1	0.799713	FALSE	Microglia_1	0.574696	0.659762	SVZ
0.468117	0.0758192	0.06	0.072	1	DS_vs_WT	Slc17a6	0.545332	FALSE	Microglia_1	0.549801	0.633428	SVZ
0.153558	0.071824	0.093	0.119	1	DS_vs_WT	Qars	0.271125	FALSE	Microglia_1	0.443679	0.517371	SVZ
0.409311	0.0713019	0.146	0.166	1	DS_vs_WT	H2afx	0.498076	FALSE	Microglia_1	1.02603	1.12868	SVZ
0.0231473	0.0682476	0.026	0.051	1	DS_vs_WT	Pex1	0.0697504	FALSE	Microglia_1	0.266555	0.32791	SVZ
0.10054	0.0662566	0.139	0.179	1	DS_vs_WT	Rcan1	0.201079	FALSE	Microglia_1	0.901415	0.990775	SVZ
0.191038	0.0626415	0.099	0.128	1	DS_vs_WT	Dyrk1a	0.30839	FALSE	Microglia_1	0.736049	0.813089	SVZ
0.491742	0.0599907	0.053	0.064	1	DS_vs_WT	Galc	0.567628	FALSE	Microglia_1	0.242422	0.295174	SVZ
0.117608	0.0545715	0.113	0.149	1	DS_vs_WT	Tle4	0.221495	FALSE	Microglia_1	0.882484	0.955055	SVZ
0.158256	0.0455473	0.225	0.281	1	DS_vs_WT	Fbln2	0.272693	FALSE	Microglia_1	2.34974	2.45719	SVZ
0.317063	0.0444378	0.132	0.162	1	DS_vs_WT	Ythdf1	0.424001	FALSE	Microglia_1	0.989014	1.05123	SVZ
0.981558	0.0384877	0.099	0.094	1	DS_vs_WT	Aldh9a1	0.98592	FALSE	Microglia_1	0.577431	0.62008	SVZ
0.854753	0.0382559	0.132	0.14	1	DS_vs_WT	Mavs	0.88612	FALSE	Microglia_1	0.93736	0.98942	SVZ
0.535546	0.0378347	0.099	0.119	1	DS_vs_WT	Aldh2	0.605494	FALSE	Microglia_1	0.73254	0.778576	SVZ
0.0160037	0.0374179	0.066	0.115	1	DS_vs_WT	Mettl3	0.0565096	FALSE	Microglia_1	0.553395	0.594212	SVZ
0.00451167	0.0351986	0.166	0.243	1	DS_vs_WT	Traf3	0.0226586	FALSE	Microglia_1	1.45875	1.51948	SVZ
0.778665	0.0244333	0.086	0.102	1	DS_vs_WT	Vars2	0.818503	FALSE	Microglia_1	0.687037	0.715851	SVZ
0.0776972	0.0229409	0.238	0.298	1	DS_vs_WT	Tle3	0.17058	FALSE	Microglia_1	2.01595	2.06429	SVZ
0.930889	0.020822	0.053	0.047	1	DS_vs_WT	Lhx2	0.951098	FALSE	Microglia_1	0.413648	0.434198	SVZ
0.930181	0.0205772	0.06	0.064	1	DS_vs_WT	Optn	0.951098	FALSE	Microglia_1	0.376425	0.396198	SVZ
0.795601	0.0205484	0.139	0.153	1	DS_vs_WT	Foxo1	0.832434	FALSE	Microglia_1	1.38431	1.41851	SVZ
0.604522	0.00682211	0.139	0.162	1	DS_vs_WT	Psmb2	0.663214	FALSE	Microglia_1	1.07594	1.08578	SVZ
0.672705	0.006026	0.073	0.089	1	DS_vs_WT	Prdx5	0.720527	FALSE	Microglia_1	0.522154	0.528525	SVZ
1	0	1	1	1	DS_vs_WT	Unnamed: 0	1	FALSE	Microglia_1	1.51978e-177	1.21799e-178	SVZ
0.0799665	-0.00488084	0.172	0.238	1	DS_vs_WT	Gad2	0.172118	FALSE	Microglia_1	1.62248	1.61362	SVZ
0.240355	-0.00625041	0.073	0.106	1	DS_vs_WT	Grip1	0.348207	FALSE	Microglia_1	0.553133	0.546418	SVZ
0.0192678	-0.00823542	0.106	0.174	1	DS_vs_WT	Trp53	0.0613314	FALSE	Microglia_1	1.04171	1.03008	SVZ
0.103657	-0.0170086	0.026	0.051	1	DS_vs_WT	Fzd5	0.201952	FALSE	Microglia_1	0.355614	0.339726	SVZ
0.325098	-0.0209441	0.159	0.2	1	DS_vs_WT	Wnt7a	0.429661	FALSE	Microglia_1	1.0643	1.03455	SVZ
0.907442	-0.0269322	0.06	0.055	1	DS_vs_WT	Nfe2l2	0.936447	FALSE	Microglia_1	0.406896	0.380875	SVZ
0.956286	-0.0289435	0.119	0.115	1	DS_vs_WT	Fgfr2	0.964824	FALSE	Microglia_1	0.950621	0.911877	SVZ
0.580821	-0.0463955	0.04	0.06	1	DS_vs_WT	Npc2	0.640319	FALSE	Microglia_1	0.256416	0.216654	SVZ
0.20055	-0.0607427	0.04	0.072	1	DS_vs_WT	Casp3	0.312581	FALSE	Microglia_1	0.424199	0.36548	SVZ
0.157714	-0.06256	0.219	0.285	1	DS_vs_WT	Ikbkb	0.272693	FALSE	Microglia_1	1.57747	1.46809	SVZ
0.000625805	-0.0638742	0.139	0.247	0.313528	DS_vs_WT	Ythdc1	0.00651765	FALSE	Microglia_1	1.52745	1.41799	SVZ
0.0780261	-0.064967	0.119	0.179	1	DS_vs_WT	Npc1	0.17058	FALSE	Microglia_1	1.19407	1.09745	SVZ
0.08531	-0.0730256	0.411	0.502	1	DS_vs_WT	Nlgn2	0.177967	FALSE	Microglia_1	4.20124	3.94452	SVZ
0.0940524	-0.073331	0.106	0.166	1	DS_vs_WT	Slc1a3	0.191494	FALSE	Microglia_1	1.22134	1.11125	SVZ
0.445222	-0.0744643	0.04	0.064	1	DS_vs_WT	Itgam	0.532382	FALSE	Microglia_1	0.366623	0.297875	SVZ
0.952782	-0.0756989	0.086	0.094	1	DS_vs_WT	Hras	0.964824	FALSE	Microglia_1	0.640044	0.556209	SVZ
0.348658	-0.0772582	0.046	0.077	1	DS_vs_WT	Glb1	0.447709	FALSE	Microglia_1	0.40984	0.336327	SVZ
0.0961051	-0.0791718	0.04	0.081	1	DS_vs_WT	Sod2	0.193926	FALSE	Microglia_1	0.43351	0.356962	SVZ
0.014999	-0.0799927	0.013	0.06	1	DS_vs_WT	Kras	0.0546736	FALSE	Microglia_1	0.170321	0.107197	SVZ
0.198925	-0.0936768	0.119	0.17	1	DS_vs_WT	Psme1	0.312202	FALSE	Microglia_1	1.09027	0.958859	SVZ
0.331601	-0.0947004	0.046	0.081	1	DS_vs_WT	Atrip	0.4307	FALSE	Microglia_1	0.31807	0.234328	SVZ
0.193983	-0.0988416	0.06	0.102	1	DS_vs_WT	Cux2	0.310922	FALSE	Microglia_1	0.570526	0.46653	SVZ
0.252335	-0.101506	0.026	0.055	1	DS_vs_WT	Cdkn1a	0.357034	FALSE	Microglia_1	0.304033	0.215436	SVZ
0.549671	-0.102849	0.291	0.34	1	DS_vs_WT	Tle1	0.618038	FALSE	Microglia_1	2.49478	2.25431	SVZ
0.410116	-0.10371	0.033	0.06	1	DS_vs_WT	Clspn	0.498076	FALSE	Microglia_1	0.3018	0.211503	SVZ
0.246899	-0.104443	0.033	0.068	1	DS_vs_WT	Axin1	0.355408	FALSE	Microglia_1	0.267737	0.179203	SVZ
0.405483	-0.113115	0.166	0.213	1	DS_vs_WT	Gabbr1	0.498076	FALSE	Microglia_1	1.67506	1.47334	SVZ
0.0216795	-0.113184	0.119	0.196	1	DS_vs_WT	Jak1	0.0662102	FALSE	Microglia_1	1.30284	1.12908	SVZ
0.631613	-0.117186	0.079	0.106	1	DS_vs_WT	Sorl1	0.682988	FALSE	Microglia_1	0.699998	0.567371	SVZ
0.166793	-0.119325	0.225	0.298	1	DS_vs_WT	Gusb	0.282804	FALSE	Microglia_1	2.52094	2.24144	SVZ
0.0147672	-0.121766	0.086	0.162	1	DS_vs_WT	Atf6	0.0546736	FALSE	Microglia_1	0.909056	0.754541	SVZ
0.207642	-0.1255	0.046	0.085	1	DS_vs_WT	Rad50	0.320726	FALSE	Microglia_1	0.499427	0.374505	SVZ
0.33053	-0.127439	0.126	0.174	1	DS_vs_WT	Smurf1	0.4307	FALSE	Microglia_1	1.05335	0.879745	SVZ
0.171762	-0.128767	0.046	0.089	1	DS_vs_WT	Sox5	0.287542	FALSE	Microglia_1	0.401433	0.281768	SVZ
0.0762417	-0.129166	0.04	0.089	1	DS_vs_WT	Gpx1	0.17058	FALSE	Microglia_1	0.414851	0.293683	SVZ
0.466205	-0.129801	0.053	0.085	1	DS_vs_WT	Mdm2	0.545332	FALSE	Microglia_1	0.364937	0.247495	SVZ
0.00140338	-0.137472	0.033	0.102	0.703094	DS_vs_WT	Cd47	0.0102311	TRUE	Microglia_1	0.498328	0.362146	SVZ
0.534843	-0.141318	0.272	0.323	1	DS_vs_WT	Anxa6	0.605494	FALSE	Microglia_1	2.99089	2.6185	SVZ
0.25873	-0.148678	0.02	0.051	1	DS_vs_WT	Irf9	0.36221	FALSE	Microglia_1	0.227315	0.107132	SVZ
0.119744	-0.150458	0.02	0.055	1	DS_vs_WT	Cebpb	0.223655	FALSE	Microglia_1	0.325571	0.194292	SVZ
0.412125	-0.163714	0.318	0.383	1	DS_vs_WT	Mtor	0.498076	FALSE	Microglia_1	2.76272	2.35907	SVZ
0.0446686	-0.173094	0.06	0.119	1	DS_vs_WT	Cnr1	0.112168	FALSE	Microglia_1	0.777641	0.576658	SVZ
0.216569	-0.181168	0.119	0.179	1	DS_vs_WT	Axin2	0.326297	FALSE	Microglia_1	1.12553	0.874691	SVZ
0.270523	-0.190009	0.02	0.051	1	DS_vs_WT	Gpx7	0.375081	FALSE	Microglia_1	0.260268	0.104751	SVZ
0.455036	-0.19041	0.371	0.374	1	DS_vs_WT	C1qa	0.53842	FALSE	Microglia_1	3.17854	2.66189	SVZ
0.0756484	-0.190853	0.026	0.072	1	DS_vs_WT	Cflar	0.17058	FALSE	Microglia_1	0.360162	0.191621	SVZ
0.0161541	-0.194726	0.073	0.153	1	DS_vs_WT	Itch	0.0565096	FALSE	Microglia_1	0.768931	0.545584	SVZ
0.00233618	-0.195367	0.026	0.098	1	DS_vs_WT	Creb1	0.015085	TRUE	Microglia_1	0.442964	0.260214	SVZ
0.465496	-0.207396	0.04	0.068	1	DS_vs_WT	Sirt5	0.545332	FALSE	Microglia_1	0.370343	0.186853	SVZ
0.102999	-0.213404	0.099	0.17	1	DS_vs_WT	Sp1	0.201952	FALSE	Microglia_1	0.889447	0.629647	SVZ
0.189457	-0.222581	0.04	0.085	1	DS_vs_WT	Ifit2	0.308038	FALSE	Microglia_1	0.437864	0.232294	SVZ
0.25226	-0.227939	0.06	0.106	1	DS_vs_WT	Nrf1	0.357034	FALSE	Microglia_1	0.656096	0.414064	SVZ
0.210033	-0.23218	0.113	0.174	1	DS_vs_WT	C1qc	0.320726	FALSE	Microglia_1	1.2431	0.909656	SVZ
0.174585	-0.232678	0.258	0.345	1	DS_vs_WT	Arx	0.288001	FALSE	Microglia_1	3.22834	2.59854	SVZ
0.629067	-0.238416	0.199	0.238	1	DS_vs_WT	Ascl1	0.682988	FALSE	Microglia_1	2.30839	1.80444	SVZ
0.225723	-0.23949	0.026	0.064	1	DS_vs_WT	Cxcr4	0.335615	FALSE	Microglia_1	0.368181	0.15891	SVZ
0.294685	-0.239567	0.026	0.06	1	DS_vs_WT	Egfr	0.403182	FALSE	Microglia_1	0.398015	0.184118	SVZ
0.102302	-0.245698	0.026	0.072	1	DS_vs_WT	Grin2b	0.201952	FALSE	Microglia_1	0.478126	0.246663	SVZ
0.0164544	-0.246051	0.007	0.051	1	DS_vs_WT	Itgb2	0.0565096	FALSE	Microglia_1	0.276423	0.0762817	SVZ
0.0394386	-0.255319	0.033	0.094	1	DS_vs_WT	Rgs8	0.101285	FALSE	Microglia_1	0.487987	0.246638	SVZ
0.01913	-0.255878	0.364	0.502	1	DS_vs_WT	Sall1	0.0613314	FALSE	Microglia_1	4.59547	3.68608	SVZ
0.00478482	-0.257149	0.02	0.089	1	DS_vs_WT	Trp53bp1	0.023508	TRUE	Microglia_1	0.379159	0.153997	SVZ
0.0201049	-0.258523	0.026	0.089	1	DS_vs_WT	Wtap	0.0631069	FALSE	Microglia_1	0.417935	0.185314	SVZ
0.259638	-0.259175	0.046	0.089	1	DS_vs_WT	Aqp4	0.36221	FALSE	Microglia_1	0.479842	0.236506	SVZ
0.360977	-0.259237	0.159	0.217	1	DS_vs_WT	Acads	0.458319	FALSE	Microglia_1	1.33801	0.95348	SVZ
0.0655774	-0.265528	0.311	0.426	1	DS_vs_WT	Eif4g1	0.15438	FALSE	Microglia_1	3.46822	2.71708	SVZ
0.19697	-0.266535	0.106	0.17	1	DS_vs_WT	Bcl2l2	0.311295	FALSE	Microglia_1	1.00149	0.66387	SVZ
0.0610622	-0.269425	0.132	0.221	1	DS_vs_WT	Arf1	0.145264	FALSE	Microglia_1	1.3754	0.970754	SVZ
0.208691	-0.272332	0.159	0.23	1	DS_vs_WT	Cx3cr1	0.320726	FALSE	Microglia_1	2.3269	1.75461	SVZ
0.252768	-0.272789	0.046	0.089	1	DS_vs_WT	Rars	0.357034	FALSE	Microglia_1	0.462711	0.210712	SVZ
0.0818535	-0.274764	0.172	0.264	1	DS_vs_WT	Mapt	0.174518	FALSE	Microglia_1	2.24656	1.68355	SVZ
0.196184	-0.275226	0.02	0.055	1	DS_vs_WT	B2m	0.311295	FALSE	Microglia_1	0.337567	0.105259	SVZ
0.0297487	-0.276775	0.033	0.094	1	DS_vs_WT	Plin2	0.0830026	FALSE	Microglia_1	0.579852	0.304064	SVZ
0.0169339	-0.278283	0.007	0.055	1	DS_vs_WT	Mettl4	0.0571205	FALSE	Microglia_1	0.284878	0.0594737	SVZ
0.00546324	-0.279562	0.066	0.157	1	DS_vs_WT	Jak2	0.0251978	TRUE	Microglia_1	0.971271	0.624015	SVZ
0.0326423	-0.283262	0.007	0.051	1	DS_vs_WT	Prdx2	0.0888815	FALSE	Microglia_1	0.254548	0.0309011	SVZ
0.00178366	-0.283319	0.06	0.162	0.893613	DS_vs_WT	Ifnar1	0.0122154	TRUE	Microglia_1	0.665145	0.368247	SVZ
0.0181089	-0.287889	0.007	0.055	1	DS_vs_WT	Pecam1	0.0601855	FALSE	Microglia_1	0.284737	0.0523274	SVZ
0.093213	-0.297719	0.026	0.077	1	DS_vs_WT	Mx1	0.191494	FALSE	Microglia_1	0.399448	0.138503	SVZ
0.316063	-0.297938	0.066	0.111	1	DS_vs_WT	Cnp	0.424001	FALSE	Microglia_1	0.719103	0.398343	SVZ
0.00125542	-0.301017	0.086	0.2	0.628967	DS_vs_WT	Pdia3	0.00945752	TRUE	Microglia_1	1.18624	0.774527	SVZ
0.316367	-0.301419	0.033	0.055	1	DS_vs_WT	Acadl	0.424001	FALSE	Microglia_1	0.409841	0.144021	SVZ
0.112152	-0.30178	0.013	0.051	1	DS_vs_WT	Prox1	0.216636	FALSE	Microglia_1	0.372674	0.113583	SVZ
0.0359371	-0.30408	0.391	0.523	1	DS_vs_WT	Ctnnb1	0.0933539	FALSE	Microglia_1	6.3786	4.97636	SVZ
0.00666179	-0.312862	0.013	0.077	1	DS_vs_WT	Smurf2	0.0295209	TRUE	Microglia_1	0.432068	0.152877	SVZ
4.1464e-05	-0.314114	0.026	0.128	0.0207734	DS_vs_WT	Syn1	0.00111918	TRUE	Microglia_1	0.587966	0.277272	SVZ
0.0527947	-0.320736	0.457	0.583	1	DS_vs_WT	Lmnb1	0.128297	FALSE	Microglia_1	6.77881	5.22819	SVZ
0.000870154	-0.326542	0.013	0.085	0.435947	DS_vs_WT	Lamp2	0.00756365	TRUE	Microglia_1	0.449109	0.155585	SVZ
0.011172	-0.334057	0.013	0.077	1	DS_vs_WT	Cr1l	0.042081	TRUE	Microglia_1	0.344065	0.0662504	SVZ
0.0103782	-0.335119	0.033	0.111	1	DS_vs_WT	Rnf5	0.0397539	TRUE	Microglia_1	0.575051	0.248572	SVZ
0.0240667	-0.349309	0.026	0.094	1	DS_vs_WT	Braf	0.0715668	FALSE	Microglia_1	0.418952	0.113821	SVZ
0.00406867	-0.35836	0.232	0.383	1	DS_vs_WT	Ep300	0.0210568	TRUE	Microglia_1	2.61909	1.82308	SVZ
0.0050418	-0.362388	0.033	0.111	1	DS_vs_WT	Il10ra	0.0242435	TRUE	Microglia_1	0.724618	0.341539	SVZ
0.0184887	-0.365356	0.099	0.2	1	DS_vs_WT	Sars	0.0605571	FALSE	Microglia_1	1.35205	0.825846	SVZ
0.000712306	-0.366796	0.258	0.434	0.356865	DS_vs_WT	Apc	0.00699918	TRUE	Microglia_1	3.35404	2.37657	SVZ
0.00167465	-0.387345	0.066	0.179	0.838998	DS_vs_WT	Crebbp	0.0118272	TRUE	Microglia_1	0.94825	0.489505	SVZ
0.000273606	-0.387601	0	0.06	0.137077	DS_vs_WT	Hus1	0.00363736	TRUE	Microglia_1	0.308216	0	SVZ
0.0289624	-0.387714	0.053	0.132	1	DS_vs_WT	Cd68	0.0818187	FALSE	Microglia_1	0.778426	0.359322	SVZ
0.000935862	-0.397836	0.02	0.111	0.468867	DS_vs_WT	Traf6	0.00783351	TRUE	Microglia_1	0.49353	0.133583	SVZ
2.22409e-09	-0.403461	0.066	0.238	1.11427e-06	DS_vs_WT	Vcan	5.02644e-07	TRUE	Microglia_1	1.33012	0.761672	SVZ
0.0358816	-0.405744	0.079	0.166	1	DS_vs_WT	Fcgr3	0.0933539	FALSE	Microglia_1	1.24366	0.69362	SVZ
0.0330653	-0.412971	0.04	0.111	1	DS_vs_WT	Aif1	0.0889613	FALSE	Microglia_1	0.726308	0.296587	SVZ
0.31896	-0.413979	0.033	0.064	1	DS_vs_WT	Nos1	0.42403	FALSE	Microglia_1	0.653032	0.240683	SVZ
0.00409955	-0.416099	0.046	0.136	1	DS_vs_WT	Ctss	0.0210568	TRUE	Microglia_1	0.970296	0.476636	SVZ
0.00710303	-0.433037	0.046	0.136	1	DS_vs_WT	Il6ra	0.0308709	TRUE	Microglia_1	0.882392	0.394289	SVZ
0.00120051	-0.43706	0.033	0.132	0.601458	DS_vs_WT	Csnk1a1	0.00935574	TRUE	Microglia_1	0.732305	0.279547	SVZ
0.0274406	-0.440235	0.245	0.374	1	DS_vs_WT	Gsk3b	0.0791789	FALSE	Microglia_1	2.91954	1.88876	SVZ
6.43317e-07	-0.452357	0.106	0.294	0.000322302	DS_vs_WT	Rac1	2.90779e-05	TRUE	Microglia_1	2.10226	1.26728	SVZ
0.116038	-0.457365	0.04	0.094	1	DS_vs_WT	Unc5d	0.220374	FALSE	Microglia_1	0.805584	0.315034	SVZ
0.000634461	-0.460348	0.099	0.238	0.317865	DS_vs_WT	Fto	0.00651765	TRUE	Microglia_1	1.54681	0.851047	SVZ
0.0858336	-0.460506	0.49	0.591	1	DS_vs_WT	Fabp7	0.177967	FALSE	Microglia_1	11.8626	8.34767	SVZ
0.00864231	-0.481709	0.113	0.234	1	DS_vs_WT	Mecp2	0.0343514	TRUE	Microglia_1	1.34709	0.680818	SVZ
0.0313174	-0.497928	0.199	0.319	1	DS_vs_WT	Clu	0.0863138	FALSE	Microglia_1	3.3779	2.10009	SVZ
0.0210526	-0.499651	0.046	0.128	1	DS_vs_WT	Ccna2	0.0651764	FALSE	Microglia_1	0.802215	0.274667	SVZ
0.00020171	-0.511312	0.086	0.234	0.101057	DS_vs_WT	Mapk14	0.0030391	TRUE	Microglia_1	1.39485	0.68019	SVZ
0.056202	-0.52868	0.073	0.149	1	DS_vs_WT	Cux1	0.135124	FALSE	Microglia_1	1.10347	0.458101	SVZ
0.359518	-0.532915	0.073	0.098	1	DS_vs_WT	Gria1	0.458319	FALSE	Microglia_1	1.22959	0.540993	SVZ
0.0274687	-0.536943	0.033	0.098	1	DS_vs_WT	Sirt1	0.0791789	FALSE	Microglia_1	0.680144	0.158005	SVZ
0.000119335	-0.539863	0.007	0.102	0.0597867	DS_vs_WT	Prkaa1	0.00224747	TRUE	Microglia_1	0.495006	0.0283191	SVZ
0.0338446	-0.543518	0.106	0.204	1	DS_vs_WT	Fbln1	0.0899869	FALSE	Microglia_1	1.69196	0.84694	SVZ
0.0102924	-0.557429	0.464	0.609	1	DS_vs_WT	Tubb3	0.0397539	TRUE	Microglia_1	11.1667	7.26745	SVZ
0.000366398	-0.570419	0.099	0.247	0.183565	DS_vs_WT	Dcx	0.0043582	TRUE	Microglia_1	1.97709	1.00484	SVZ
4.45693e-05	-0.578986	0.026	0.149	0.0223292	DS_vs_WT	Ogt	0.00111918	TRUE	Microglia_1	0.868997	0.25117	SVZ
0.00302045	-0.589346	0.04	0.14	1	DS_vs_WT	Wars	0.0179637	TRUE	Microglia_1	0.813815	0.205541	SVZ
0.000155861	-0.594913	0.252	0.46	0.0780864	DS_vs_WT	Txnrd1	0.00270958	TRUE	Microglia_1	3.94173	2.27184	SVZ
0.000816335	-0.603737	0.364	0.557	0.408984	DS_vs_WT	Lamp1	0.00737966	TRUE	Microglia_1	7.12536	4.34687	SVZ
1.08864e-07	-0.620946	0.073	0.272	5.45408e-05	DS_vs_WT	Nras	8.20109e-06	TRUE	Microglia_1	1.59013	0.684216	SVZ
0.000453063	-0.682634	0.033	0.149	0.226985	DS_vs_WT	Otud4	0.00511962	TRUE	Microglia_1	0.894953	0.180606	SVZ
0.00403593	-0.697623	0.04	0.136	1	DS_vs_WT	Csf3r	0.0210568	TRUE	Microglia_1	1.03228	0.253077	SVZ
0.0034482	-0.7106	0.126	0.255	1	DS_vs_WT	Lrp6	0.0199819	TRUE	Microglia_1	1.76929	0.692219	SVZ
0.00102632	-0.739912	0.073	0.204	0.514189	DS_vs_WT	Hif1a	0.00828391	TRUE	Microglia_1	1.38283	0.426781	SVZ
0.000192216	-0.752122	0.026	0.145	0.0963002	DS_vs_WT	Mapk1	0.0030391	TRUE	Microglia_1	0.953931	0.160107	SVZ
3.30624e-05	-0.789495	0.013	0.128	0.0165642	DS_vs_WT	Topbp1	0.00106744	TRUE	Microglia_1	0.797989	0.0402205	SVZ
0.00205849	-0.857638	0.172	0.323	1	DS_vs_WT	Gad1	0.0136829	TRUE	Microglia_1	3.99474	1.75638	SVZ
0.000299349	-0.890733	0.318	0.506	0.149974	DS_vs_WT	Csf1r	0.0037585	TRUE	Microglia_1	7.02551	3.32848	SVZ
0.00269497	-0.896034	0.099	0.209	1	DS_vs_WT	Sp8	0.0164612	TRUE	Microglia_1	1.85604	0.534728	SVZ
9.33868e-05	-0.951712	0.132	0.319	0.0467868	DS_vs_WT	Mki67	0.00195315	TRUE	Microglia_1	3.46473	1.30835	SVZ
4.14497e-07	-1.07694	0.033	0.213	0.000207663	DS_vs_WT	Map2	2.34191e-05	TRUE	Microglia_1	1.47324	0.1724	SVZ
3.37455e-08	-1.1662	0.199	0.481	1.69065e-05	DS_vs_WT	Hsp90b1	3.81324e-06	TRUE	Microglia_1	4.96011	1.65578	SVZ
4.32254e-06	-1.41972	0.099	0.302	0.00216559	DS_vs_WT	Gfap	0.000162816	TRUE	Microglia_1	4.12779	0.916686	SVZ
p_val	avg_log2FC	pct.1	pct.2	p_val_adj	comparison	gene	FDR	sig	celltype	exp.1	exp.2	SVZ
0.018628	1.11952	0.28	0.07	1	DS_vs_WT	Igfbp2	0.324347	FALSE	Microglia_2	0.243123	1.70099	SVZ
0.0271579	1.04507	0.68	0.507	1	DS_vs_WT	Ncan	0.338365	FALSE	Microglia_2	3.57709	8.44465	SVZ
0.0362902	1.02776	0.32	0.225	1	DS_vs_WT	Irf3	0.403839	FALSE	Microglia_2	0.669757	2.4044	SVZ
0.0978785	0.997865	0.12	0.042	1	DS_vs_WT	Siglec1	0.473329	FALSE	Microglia_2	0.0851763	1.16714	SVZ
0.00972678	0.990006	0.68	0.423	1	DS_vs_WT	Cyba	0.271531	FALSE	Microglia_2	2.42628	5.80526	SVZ
0.103643	0.964563	0.28	0.113	1	DS_vs_WT	Gad1	0.473329	FALSE	Microglia_2	0.544288	2.01364	SVZ
0.00750977	0.937803	0.32	0.268	1	DS_vs_WT	Pou3f3	0.271531	FALSE	Microglia_2	1.05849	2.94325	SVZ
0.253138	0.91735	0.16	0.07	1	DS_vs_WT	Mx2	0.640417	FALSE	Microglia_2	0.199276	1.26501	SVZ
0.0861804	0.908719	0.16	0.042	1	DS_vs_WT	Erap1	0.473329	FALSE	Microglia_2	0.066725	1.00265	SVZ
8.59979e-05	0.894246	0.04	0.085	0.0430849	DS_vs_WT	Mx1	0.0254554	TRUE	Microglia_2	0.32799	1.46825	SVZ
0.065766	0.865745	0.2	0.042	1	DS_vs_WT	Alkbh5	0.470424	FALSE	Microglia_2	0.182218	1.15433	SVZ
0.000834617	0.853294	0.8	0.634	0.418143	DS_vs_WT	Trem2	0.0823489	FALSE	Microglia_2	4.21398	8.41968	SVZ
0.0591178	0.823725	0.16	0.028	1	DS_vs_WT	Grip1	0.450298	FALSE	Microglia_2	0.0534488	0.864573	SVZ
0.0105257	0.762259	0.88	0.803	1	DS_vs_WT	App	0.271531	FALSE	Microglia_2	9.57377	16.9346	SVZ
0.142651	0.751937	0.12	0.056	1	DS_vs_WT	Fcgr2b	0.527808	FALSE	Microglia_2	0.116657	0.880509	SVZ
0.178316	0.748699	0.36	0.183	1	DS_vs_WT	Mapt	0.555596	FALSE	Microglia_2	0.979759	2.32654	SVZ
0.118906	0.738226	0.32	0.197	1	DS_vs_WT	Dyrk1a	0.478293	FALSE	Microglia_2	0.47459	1.4598	SVZ
0.027435	0.706956	0.16	0.141	1	DS_vs_WT	Ifnar2	0.338365	FALSE	Microglia_2	0.298764	1.12004	SVZ
0.278178	0.684031	0.16	0.113	1	DS_vs_WT	Foxj1	0.671568	FALSE	Microglia_2	0.394795	1.24091	SVZ
0.119995	0.638287	0.44	0.225	1	DS_vs_WT	Dvl1	0.478293	FALSE	Microglia_2	0.770054	1.75505	SVZ
0.160555	0.625762	0.28	0.113	1	DS_vs_WT	Foxo1	0.535139	FALSE	Microglia_2	0.425336	1.19933	SVZ
0.541669	0.617175	0.2	0.113	1	DS_vs_WT	Gria1	0.883936	FALSE	Microglia_2	0.932095	1.96358	SVZ
0.228518	0.578121	0.2	0.07	1	DS_vs_WT	Cnr1	0.631703	FALSE	Microglia_2	0.343356	1.0055	SVZ
0.049609	0.575315	0.16	0.099	1	DS_vs_WT	H2afx	0.440221	FALSE	Microglia_2	0.21865	0.815792	SVZ
0.346437	0.567026	0.6	0.563	1	DS_vs_WT	Il10ra	0.754009	FALSE	Microglia_2	4.0172	6.43281	SVZ
0.360774	0.555724	0.28	0.155	1	DS_vs_WT	Tapbp	0.771768	FALSE	Microglia_2	0.699497	1.4981	SVZ
0.239704	0.546373	0.24	0.099	1	DS_vs_WT	Wnt7a	0.633822	FALSE	Microglia_2	0.507894	1.20214	SVZ
0.0224645	0.542801	0.08	0.099	1	DS_vs_WT	Myc	0.338365	FALSE	Microglia_2	0.346886	0.962141	SVZ
0.45311	0.542645	0.12	0.056	1	DS_vs_WT	Il15ra	0.85427	FALSE	Microglia_2	0.218248	0.774549	SVZ
0.199772	0.538572	0.2	0.197	1	DS_vs_WT	Cebpb	0.597299	FALSE	Microglia_2	0.751448	1.54404	SVZ
0.252954	0.526303	0.16	0.155	1	DS_vs_WT	Cdkn1a	0.640417	FALSE	Microglia_2	0.636355	1.35673	SVZ
0.176826	0.515936	0.2	0.239	1	DS_vs_WT	Ythdc1	0.555596	FALSE	Microglia_2	1.40142	2.43385	SVZ
0.472244	0.513041	0.12	0.085	1	DS_vs_WT	Osm	0.857573	FALSE	Microglia_2	0.278551	0.824562	SVZ
0.46071	0.507689	0.28	0.296	1	DS_vs_WT	Notch1	0.856128	FALSE	Microglia_2	1.64081	2.75462	SVZ
0.099745	0.481469	0.32	0.324	1	DS_vs_WT	Tnfrsf1b	0.473329	FALSE	Microglia_2	0.973205	1.75492	SVZ
0.357963	0.476888	0.24	0.141	1	DS_vs_WT	Qars	0.771768	FALSE	Microglia_2	0.357477	0.889253	SVZ
0.618148	0.449879	0.08	0.042	1	DS_vs_WT	Thbs1	0.892545	FALSE	Microglia_2	0.274767	0.741237	SVZ
0.287285	0.445283	0.08	0.028	1	DS_vs_WT	Aars2	0.677668	FALSE	Microglia_2	0.0620492	0.446066	SVZ
0.458535	0.442251	0.12	0.085	1	DS_vs_WT	Kif7	0.856128	FALSE	Microglia_2	0.232889	0.675154	SVZ
0.437941	0.440962	0.28	0.183	1	DS_vs_WT	Tyk2	0.852833	FALSE	Microglia_2	0.621762	1.20156	SVZ
0.48446	0.416774	0.2	0.141	1	DS_vs_WT	Hsf1	0.866993	FALSE	Microglia_2	0.420062	0.895696	SVZ
0.606764	0.413297	0.16	0.113	1	DS_vs_WT	Ptch1	0.883936	FALSE	Microglia_2	0.599948	1.13069	SVZ
0.417459	0.406689	0.2	0.099	1	DS_vs_WT	Fcgr1	0.834919	FALSE	Microglia_2	0.314699	0.742817	SVZ
0.500171	0.400368	0.44	0.423	1	DS_vs_WT	Mrc1	0.875291	FALSE	Microglia_2	2.72156	3.91189	SVZ
0.526357	0.399616	0.48	0.366	1	DS_vs_WT	Acads	0.875291	FALSE	Microglia_2	1.65367	2.50061	SVZ
0.603744	0.376882	0.56	0.451	1	DS_vs_WT	Tubb3	0.883936	FALSE	Microglia_2	3.87424	5.32936	SVZ
0.329764	0.366872	0.08	0.028	1	DS_vs_WT	Sox5	0.728435	FALSE	Microglia_2	0.0341496	0.333591	SVZ
0.141305	0.359631	0.08	0.014	1	DS_vs_WT	S100a10	0.527808	FALSE	Microglia_2	0.0338189	0.32649	SVZ
0.523077	0.349537	0.12	0.056	1	DS_vs_WT	Stat2	0.875291	FALSE	Microglia_2	0.143822	0.457403	SVZ
0.264023	0.33927	0.08	0.056	1	DS_vs_WT	Egfr	0.65673	FALSE	Microglia_2	0.0668488	0.349688	SVZ
0.6654	0.327985	0.2	0.169	1	DS_vs_WT	Plk3	0.924688	FALSE	Microglia_2	0.768779	1.22028	SVZ
0.579567	0.327734	0.44	0.324	1	DS_vs_WT	Tle3	0.883936	FALSE	Microglia_2	1.58205	2.24058	SVZ
0.173736	0.307611	0.16	0.254	1	DS_vs_WT	Arx	0.552965	FALSE	Microglia_2	0.999012	1.47409	SVZ
0.313934	0.286829	0.68	0.507	1	DS_vs_WT	Csf3r	0.703973	FALSE	Microglia_2	3.73786	4.77998	SVZ
0.658488	0.284986	0.12	0.07	1	DS_vs_WT	Dlg4	0.919398	FALSE	Microglia_2	0.19887	0.460701	SVZ
0.0563914	0.272238	0.04	0.07	1	DS_vs_WT	Smpd1	0.450298	FALSE	Microglia_2	0.219465	0.472724	SVZ
0.447743	0.264459	0.2	0.099	1	DS_vs_WT	Rars	0.85427	FALSE	Microglia_2	0.288478	0.547702	SVZ
0.584033	0.263755	0.08	0.028	1	DS_vs_WT	Sod2	0.883936	FALSE	Microglia_2	0.110771	0.333591	SVZ
0.807858	0.260221	0.36	0.324	1	DS_vs_WT	Notch2	0.956503	FALSE	Microglia_2	1.41891	1.89704	SVZ
0.0593298	0.256562	0.12	0.197	1	DS_vs_WT	Mecp2	0.450298	FALSE	Microglia_2	0.523326	0.819809	SVZ
0.24238	0.241106	0.04	0.056	1	DS_vs_WT	Crym	0.634906	FALSE	Microglia_2	0.260191	0.489418	SVZ
0.151354	0.239176	0.12	0.169	1	DS_vs_WT	Cnp	0.535139	FALSE	Microglia_2	0.476498	0.742739	SVZ
0.597877	0.233185	0.12	0.099	1	DS_vs_WT	Psmb9	0.883936	FALSE	Microglia_2	0.241325	0.459087	SVZ
0.275431	0.227982	0.08	0.099	1	DS_vs_WT	Smurf2	0.671568	FALSE	Microglia_2	0.289592	0.510365	SVZ
0.588191	0.221315	0.16	0.169	1	DS_vs_WT	Ythdf1	0.883936	FALSE	Microglia_2	0.56896	0.829087	SVZ
0.73664	0.218039	0.12	0.113	1	DS_vs_WT	Gli3	0.937209	FALSE	Microglia_2	0.524375	0.773079	SVZ
0.130252	0.215782	0.32	0.408	1	DS_vs_WT	Rac1	0.500709	FALSE	Microglia_2	1.90549	2.37424	SVZ
0.737736	0.212682	0.32	0.239	1	DS_vs_WT	Bcl2l2	0.937209	FALSE	Microglia_2	1.10434	1.4386	SVZ
0.797553	0.208136	0.12	0.085	1	DS_vs_WT	Gria4	0.956503	FALSE	Microglia_2	0.255729	0.450611	SVZ
0.0913757	0.204276	0.08	0.113	1	DS_vs_WT	Vegfa	0.473329	FALSE	Microglia_2	0.324184	0.525603	SVZ
0.782182	0.204096	0.12	0.085	1	DS_vs_WT	Fuca1	0.956503	FALSE	Microglia_2	0.21149	0.395594	SVZ
0.424241	0.19942	0.16	0.07	1	DS_vs_WT	Traf2	0.842787	FALSE	Microglia_2	0.22849	0.410597	SVZ
0.92333	0.196725	0.24	0.211	1	DS_vs_WT	Ikbkg	0.990379	FALSE	Microglia_2	1.15258	1.46706	SVZ
0.583348	0.191657	0.08	0.028	1	DS_vs_WT	Mri1	0.883936	FALSE	Microglia_2	0.0719263	0.22422	SVZ
0.255779	0.179741	0.16	0.056	1	DS_vs_WT	Gstm1	0.641616	FALSE	Microglia_2	0.183379	0.34039	SVZ
0.796151	0.179672	0.12	0.099	1	DS_vs_WT	Hras	0.956503	FALSE	Microglia_2	0.239417	0.403796	SVZ
0.570971	0.169804	0.08	0.085	1	DS_vs_WT	Otx1	0.883936	FALSE	Microglia_2	0.19107	0.339841	SVZ
0.121189	0.162757	0.28	0.394	1	DS_vs_WT	Mdk	0.478293	FALSE	Microglia_2	1.42826	1.71826	SVZ
0.673932	0.150275	0.52	0.423	1	DS_vs_WT	Mapk14	0.925111	FALSE	Microglia_2	2.47999	2.86203	SVZ
0.506085	0.144262	0.16	0.211	1	DS_vs_WT	Prdx6	0.875291	FALSE	Microglia_2	0.837708	1.03097	SVZ
0.701772	0.136521	0.32	0.239	1	DS_vs_WT	Cflar	0.935274	FALSE	Microglia_2	1.25091	1.47431	SVZ
0.141305	0.133112	0.08	0.014	1	DS_vs_WT	Fas	0.527808	FALSE	Microglia_2	0.279835	0.40354	SVZ
0.782171	0.124374	0.08	0.042	1	DS_vs_WT	Syn1	0.956503	FALSE	Microglia_2	0.0898575	0.187983	SVZ
0.558373	0.118516	0.08	0.127	1	DS_vs_WT	Dkk3	0.883936	FALSE	Microglia_2	0.540422	0.672309	SVZ
0.912804	0.1167	0.16	0.127	1	DS_vs_WT	Vars2	0.990379	FALSE	Microglia_2	0.338701	0.451489	SVZ
0.925008	0.109087	0.16	0.141	1	DS_vs_WT	Rad50	0.990379	FALSE	Microglia_2	0.331723	0.436323	SVZ
0.41134	0.107988	0.12	0.056	1	DS_vs_WT	Fzd5	0.834624	FALSE	Microglia_2	0.261753	0.359822	SVZ
0.489154	0.10407	0.12	0.169	1	DS_vs_WT	Tmem119	0.867004	FALSE	Microglia_2	0.826028	0.962617	SVZ
0.87441	0.104028	0.08	0.07	1	DS_vs_WT	Nox1	0.990379	FALSE	Microglia_2	0.112873	0.196083	SVZ
0.981071	0.10231	0.08	0.07	1	DS_vs_WT	Tspo	0.99451	FALSE	Microglia_2	0.551952	0.666007	SVZ
0.605691	0.0982102	0.76	0.817	1	DS_vs_WT	Pld3	0.883936	FALSE	Microglia_2	10.376	11.1774	SVZ
0.964666	0.0944449	0.48	0.451	1	DS_vs_WT	Ctss	0.990379	FALSE	Microglia_2	3.01733	3.28913	SVZ
0.851938	0.0907118	0.16	0.183	1	DS_vs_WT	Il18	0.990379	FALSE	Microglia_2	0.935015	1.06059	SVZ
0.0973697	0.0900983	0.08	0.169	1	DS_vs_WT	Mdm2	0.473329	FALSE	Microglia_2	0.452809	0.546432	SVZ
0.431569	0.0886945	0.08	0.127	1	DS_vs_WT	Ncf2	0.84599	FALSE	Microglia_2	0.445441	0.537093	SVZ
0.917725	0.0869064	0.08	0.056	1	DS_vs_WT	Rad9a	0.990379	FALSE	Microglia_2	0.13543	0.205929	SVZ
0.865166	0.0849308	0.12	0.085	1	DS_vs_WT	Xbp1	0.990379	FALSE	Microglia_2	0.257743	0.334008	SVZ
0.910669	0.0815273	0.2	0.211	1	DS_vs_WT	Sp1	0.990379	FALSE	Microglia_2	0.88961	0.999467	SVZ
0.382818	0.0801749	0.56	0.662	1	DS_vs_WT	Lrp5	0.792406	FALSE	Microglia_2	4.78119	5.11156	SVZ
0.581537	0.076227	0.08	0.113	1	DS_vs_WT	H2-K1	0.883936	FALSE	Microglia_2	0.269399	0.338274	SVZ
0.228643	0.0745337	0.04	0.085	1	DS_vs_WT	Cdkn1c	0.631703	FALSE	Microglia_2	0.208733	0.27282	SVZ
0.702979	0.0720135	0.16	0.197	1	DS_vs_WT	Ascl1	0.935274	FALSE	Microglia_2	0.974925	1.07601	SVZ
0.0736627	0.0707228	0.32	0.465	1	DS_vs_WT	Lrp6	0.470424	FALSE	Microglia_2	2.07209	2.22644	SVZ
0.97365	0.0662664	0.16	0.141	1	DS_vs_WT	Smurf1	0.990379	FALSE	Microglia_2	0.504648	0.575372	SVZ
0.806062	0.0632397	0.44	0.479	1	DS_vs_WT	Tgfb1	0.956503	FALSE	Microglia_2	2.61413	2.77608	SVZ
0.655741	0.0624523	0.6	0.662	1	DS_vs_WT	C1qc	0.919398	FALSE	Microglia_2	5.47642	5.76293	SVZ
0.774161	0.0601821	0.04	0.056	1	DS_vs_WT	Vcam1	0.956503	FALSE	Microglia_2	0.14453	0.193284	SVZ
0.525457	0.0435708	0.32	0.239	1	DS_vs_WT	Trim25	0.875291	FALSE	Microglia_2	1.06615	1.1295	SVZ
0.0314528	0.0422455	0.04	0.127	1	DS_vs_WT	Nbn	0.372401	FALSE	Microglia_2	0.549313	0.595351	SVZ
0.77604	0.0376868	0.2	0.239	1	DS_vs_WT	Gli2	0.956503	FALSE	Microglia_2	0.832504	0.881004	SVZ
0.698719	0.0344291	0.44	0.493	1	DS_vs_WT	Eif4g1	0.935274	FALSE	Microglia_2	2.75325	2.8439	SVZ
0.75844	0.0296737	0.08	0.042	1	DS_vs_WT	Ikbke	0.94327	FALSE	Microglia_2	0.0775587	0.0999517	SVZ
0.965124	0.0252667	0.16	0.141	1	DS_vs_WT	Il4ra	0.990379	FALSE	Microglia_2	0.642447	0.671465	SVZ
0.858385	0.0203872	0.16	0.127	1	DS_vs_WT	Fbln2	0.990379	FALSE	Microglia_2	0.518572	0.540184	SVZ
0.997144	0.0170982	0.28	0.282	1	DS_vs_WT	Gsdmd	1	FALSE	Microglia_2	1.10789	1.13302	SVZ
0.989097	0.0126632	0.28	0.268	1	DS_vs_WT	Traf3	0.999224	FALSE	Microglia_2	1.18704	1.20632	SVZ
1	0	1	1	1	DS_vs_WT	Unnamed: 0	1	FALSE	Microglia_2	1.66494e-177	1.03251e-178	SVZ
0.873693	-0.00836046	0.56	0.521	1	DS_vs_WT	Csf2ra	0.990379	FALSE	Microglia_2	2.94116	2.91838	SVZ
0.997549	-0.018958	0.08	0.085	1	DS_vs_WT	Ifit2	1	FALSE	Microglia_2	0.337859	0.320393	SVZ
0.793381	-0.0203739	0.12	0.085	1	DS_vs_WT	Cd14	0.956503	FALSE	Microglia_2	0.295296	0.277132	SVZ
0.758331	-0.0235671	0.04	0.07	1	DS_vs_WT	Cxcl13	0.94327	FALSE	Microglia_2	0.159088	0.140308	SVZ
0.758225	-0.0264573	0.04	0.07	1	DS_vs_WT	Ythdf2	0.94327	FALSE	Microglia_2	0.172056	0.150758	SVZ
0.868433	-0.0275879	0.12	0.099	1	DS_vs_WT	Mag	0.990379	FALSE	Microglia_2	0.278068	0.25386	SVZ
0.949905	-0.0345401	0.04	0.056	1	DS_vs_WT	Tap1	0.990379	FALSE	Microglia_2	0.0813568	0.0557751	SVZ
0.950588	-0.0430671	0.12	0.113	1	DS_vs_WT	Mdga1	0.990379	FALSE	Microglia_2	0.365684	0.325518	SVZ
0.929963	-0.0449494	0.04	0.056	1	DS_vs_WT	Fzd4	0.990379	FALSE	Microglia_2	0.231047	0.193284	SVZ
0.714094	-0.0469431	0.32	0.268	1	DS_vs_WT	Pink1	0.935274	FALSE	Microglia_2	1.09824	1.03107	SVZ
0.946973	-0.0515424	0.12	0.113	1	DS_vs_WT	Wars	0.990379	FALSE	Microglia_2	0.399574	0.350455	SVZ
0.94016	-0.0557102	0.12	0.113	1	DS_vs_WT	Mettl3	0.990379	FALSE	Microglia_2	0.446403	0.391614	SVZ
0.968862	-0.058975	0.08	0.085	1	DS_vs_WT	Fzd7	0.990379	FALSE	Microglia_2	0.267183	0.216427	SVZ
0.956286	-0.058976	0.96	0.958	1	DS_vs_WT	Lrp1	0.990379	FALSE	Microglia_2	23.3362	22.3614	SVZ
0.959651	-0.0591946	0.24	0.268	1	DS_vs_WT	Ifnar1	0.990379	FALSE	Microglia_2	1.18226	1.09453	SVZ
0.965272	-0.0672239	0.08	0.085	1	DS_vs_WT	Traf6	0.990379	FALSE	Microglia_2	0.328231	0.26776	SVZ
0.311757	-0.0689438	0.04	0.099	1	DS_vs_WT	Anpep	0.703973	FALSE	Microglia_2	0.296603	0.236098	SVZ
0.947853	-0.0702067	0.04	0.056	1	DS_vs_WT	Reln	0.990379	FALSE	Microglia_2	0.252789	0.193284	SVZ
0.961288	-0.0768606	0.28	0.31	1	DS_vs_WT	Itch	0.990379	FALSE	Microglia_2	1.28777	1.16907	SVZ
0.966156	-0.0775751	0.16	0.183	1	DS_vs_WT	Crebbp	0.990379	FALSE	Microglia_2	0.751731	0.660027	SVZ
0.972402	-0.0780196	0.44	0.465	1	DS_vs_WT	Anxa6	0.990379	FALSE	Microglia_2	2.64453	2.45267	SVZ
0.0114729	-0.0829735	0.08	0.225	1	DS_vs_WT	Sars	0.271531	FALSE	Microglia_2	0.838408	0.735659	SVZ
0.855698	-0.0918415	0.04	0.07	1	DS_vs_WT	Rela	0.990379	FALSE	Microglia_2	0.159342	0.0878389	SVZ
0.29932	-0.095453	0.04	0.113	1	DS_vs_WT	Pycard	0.687196	FALSE	Microglia_2	0.281583	0.199534	SVZ
0.942691	-0.0998912	0.04	0.056	1	DS_vs_WT	Psmb10	0.990379	FALSE	Microglia_2	0.241208	0.158175	SVZ
0.710738	-0.100077	0.16	0.225	1	DS_vs_WT	Prdx5	0.935274	FALSE	Microglia_2	0.946513	0.816064	SVZ
0.724084	-0.101265	0.88	0.845	1	DS_vs_WT	C1qa	0.935981	FALSE	Microglia_2	12.4684	11.5555	SVZ
0.902044	-0.103772	0.04	0.056	1	DS_vs_WT	Grin1	0.990379	FALSE	Microglia_2	0.153785	0.0737081	SVZ
0.907492	-0.105329	0.04	0.056	1	DS_vs_WT	Irf9	0.990379	FALSE	Microglia_2	0.155031	0.0737081	SVZ
0.467459	-0.106431	0.04	0.099	1	DS_vs_WT	Axin2	0.856128	FALSE	Microglia_2	0.291372	0.199534	SVZ
0.232845	-0.108565	0.08	0.028	1	DS_vs_WT	Npy	0.632312	FALSE	Microglia_2	0.28072	0.187881	SVZ
0.891563	-0.113826	0.08	0.099	1	DS_vs_WT	Nrf1	0.990379	FALSE	Microglia_2	0.218843	0.126375	SVZ
0.481237	-0.119159	0.2	0.296	1	DS_vs_WT	Aldh2	0.866993	FALSE	Microglia_2	1.20422	1.02947	SVZ
0.559782	-0.120388	0.08	0.056	1	DS_vs_WT	Fzd8	0.883936	FALSE	Microglia_2	0.19948	0.10345	SVZ
0.829476	-0.121616	0.04	0.07	1	DS_vs_WT	Sirt1	0.974305	FALSE	Microglia_2	0.370358	0.259574	SVZ
0.60058	-0.127943	0.16	0.239	1	DS_vs_WT	Tle1	0.883936	FALSE	Microglia_2	1.09189	0.914359	SVZ
0.917273	-0.135623	0.16	0.197	1	DS_vs_WT	Otud4	0.990379	FALSE	Microglia_2	0.808207	0.645969	SVZ
0.883192	-0.136374	0.08	0.113	1	DS_vs_WT	Ncf4	0.990379	FALSE	Microglia_2	0.316862	0.198085	SVZ
0.861789	-0.139189	0.04	0.056	1	DS_vs_WT	Ccnd1	0.990379	FALSE	Microglia_2	0.16271	0.0557751	SVZ
0.713506	-0.142606	0.04	0.085	1	DS_vs_WT	Cxcl5	0.935274	FALSE	Microglia_2	0.156413	0.0475729	SVZ
0.910316	-0.147581	0.28	0.282	1	DS_vs_WT	Plin2	0.990379	FALSE	Microglia_2	1.64707	1.38968	SVZ
0.468557	-0.148503	0.08	0.169	1	DS_vs_WT	Optn	0.856128	FALSE	Microglia_2	0.344705	0.213174	SVZ
0.166327	-0.164941	0	0.056	1	DS_vs_WT	Pdk3	0.535139	FALSE	Microglia_2	0.121121	0	SVZ
0.733829	-0.170589	0.04	0.056	1	DS_vs_WT	H2-Oa	0.937209	FALSE	Microglia_2	0.179062	0.0475729	SVZ
0.486219	-0.173356	0.16	0.254	1	DS_vs_WT	Gsk3b	0.866993	FALSE	Microglia_2	0.98006	0.755873	SVZ
0.166327	-0.183686	0	0.056	1	DS_vs_WT	Stat1	0.535139	FALSE	Microglia_2	0.135782	0	SVZ
0.166327	-0.188414	0	0.056	1	DS_vs_WT	Slc17a7	0.535139	FALSE	Microglia_2	0.13951	0	SVZ
0.166327	-0.199814	0	0.056	1	DS_vs_WT	Relb	0.535139	FALSE	Microglia_2	0.14855	0	SVZ
0.822158	-0.200977	0.12	0.169	1	DS_vs_WT	Irf2	0.969557	FALSE	Microglia_2	0.540974	0.340588	SVZ
0.895584	-0.202006	0.12	0.141	1	DS_vs_WT	Rbfox3	0.990379	FALSE	Microglia_2	0.482906	0.289151	SVZ
0.529405	-0.202058	0.24	0.352	1	DS_vs_WT	Itgb2	0.875441	FALSE	Microglia_2	2.08355	1.68056	SVZ
0.0426348	-0.203462	0.12	0.042	1	DS_vs_WT	Satb2	0.433088	FALSE	Microglia_2	0.360747	0.18176	SVZ
0.0851997	-0.203579	0.24	0.437	1	DS_vs_WT	Jak1	0.473329	FALSE	Microglia_2	2.49235	2.03274	SVZ
0.671166	-0.203757	0.2	0.183	1	DS_vs_WT	Zhx2	0.925111	FALSE	Microglia_2	1.0581	0.787021	SVZ
0.239825	-0.207166	0.04	0.141	1	DS_vs_WT	Cd47	0.633822	FALSE	Microglia_2	0.379423	0.194908	SVZ
0.804015	-0.211208	0.36	0.366	1	DS_vs_WT	Csf2rb	0.956503	FALSE	Microglia_2	1.62767	1.26982	SVZ
0.113535	-0.215001	0	0.07	1	DS_vs_WT	Prdx2	0.473329	FALSE	Microglia_2	0.160705	0	SVZ
0.334477	-0.226042	0.08	0.183	1	DS_vs_WT	Mapk1	0.733373	FALSE	Microglia_2	0.571314	0.343437	SVZ
0.520678	-0.228756	0.2	0.31	1	DS_vs_WT	Vars	0.875291	FALSE	Microglia_2	1.15171	0.836206	SVZ
0.113535	-0.228999	0	0.07	1	DS_vs_WT	Ddit3	0.473329	FALSE	Microglia_2	0.172022	0	SVZ
0.113535	-0.230777	0	0.07	1	DS_vs_WT	Ptprc	0.473329	FALSE	Microglia_2	0.173467	0	SVZ
0.575276	-0.235365	0.32	0.296	1	DS_vs_WT	Mavs	0.883936	FALSE	Microglia_2	1.25106	0.912204	SVZ
0.633974	-0.248972	0.04	0.056	1	DS_vs_WT	Rfx5	0.902194	FALSE	Microglia_2	0.30167	0.0953503	SVZ
0.858874	-0.250242	0.2	0.239	1	DS_vs_WT	Nlgn2	0.990379	FALSE	Microglia_2	1.26575	0.904942	SVZ
0.497017	-0.252962	0.08	0.099	1	DS_vs_WT	Pecam1	0.875291	FALSE	Microglia_2	0.336176	0.121281	SVZ
0.46417	-0.253939	0.88	0.944	1	DS_vs_WT	C1qb	0.856128	FALSE	Microglia_2	17.3004	14.3467	SVZ
0.113535	-0.258274	0	0.07	1	DS_vs_WT	Kras	0.473329	FALSE	Microglia_2	0.196047	0	SVZ
0.804299	-0.266184	0.04	0.07	1	DS_vs_WT	Sirt3	0.956503	FALSE	Microglia_2	0.383201	0.150154	SVZ
0.166327	-0.266197	0	0.056	1	DS_vs_WT	Wnt7b	0.535139	FALSE	Microglia_2	0.202634	0	SVZ
0.727283	-0.266265	0.08	0.127	1	DS_vs_WT	Psmb2	0.935981	FALSE	Microglia_2	0.446581	0.202788	SVZ
0.166327	-0.267551	0	0.056	1	DS_vs_WT	Mif	0.535139	FALSE	Microglia_2	0.203763	0	SVZ
0.795392	-0.270031	0.28	0.296	1	DS_vs_WT	Aldh1l1	0.956503	FALSE	Microglia_2	1.67701	1.22005	SVZ
0.703336	-0.271617	0.12	0.127	1	DS_vs_WT	Gad2	0.935274	FALSE	Microglia_2	0.75337	0.452475	SVZ
0.646485	-0.27238	0.04	0.056	1	DS_vs_WT	Prkaa1	0.915596	FALSE	Microglia_2	0.265381	0.0476752	SVZ
0.94039	-0.273808	0.08	0.099	1	DS_vs_WT	Cux2	0.990379	FALSE	Microglia_2	0.849911	0.530123	SVZ
0.516154	-0.276035	0.04	0.113	1	DS_vs_WT	Galc	0.875291	FALSE	Microglia_2	0.392678	0.150154	SVZ
0.113535	-0.278761	0	0.07	1	DS_vs_WT	Trim21	0.473329	FALSE	Microglia_2	0.213153	0	SVZ
0.0778742	-0.279462	0	0.085	1	DS_vs_WT	Casp7	0.470424	FALSE	Microglia_2	0.213742	0	SVZ
0.0778742	-0.28399	0	0.085	1	DS_vs_WT	Cr1l	0.470424	FALSE	Microglia_2	0.217557	0	SVZ
0.519212	-0.284024	0.08	0.169	1	DS_vs_WT	Gabbr1	0.875291	FALSE	Microglia_2	0.458335	0.197727	SVZ
0.751885	-0.284908	0.32	0.394	1	DS_vs_WT	Psen1	0.94327	FALSE	Microglia_2	1.68991	1.20786	SVZ
0.543432	-0.28669	0.04	0.099	1	DS_vs_WT	Ifi27	0.883936	FALSE	Microglia_2	0.277994	0.0476752	SVZ
0.719523	-0.288422	0.08	0.085	1	DS_vs_WT	Axin1	0.935981	FALSE	Microglia_2	0.463225	0.198085	SVZ
0.709361	-0.288494	0.04	0.056	1	DS_vs_WT	Acadl	0.935274	FALSE	Microglia_2	0.285214	0.0522765	SVZ
0.0368366	-0.292697	0	0.113	1	DS_vs_WT	Pex1	0.403839	FALSE	Microglia_2	0.224928	0	SVZ
0.0778742	-0.295753	0	0.085	1	DS_vs_WT	Wtap	0.470424	FALSE	Microglia_2	0.227525	0	SVZ
0.0535403	-0.300522	0	0.099	1	DS_vs_WT	Braf	0.440221	FALSE	Microglia_2	0.23159	0	SVZ
0.726637	-0.303002	0.08	0.127	1	DS_vs_WT	Csnk1a1	0.935981	FALSE	Microglia_2	0.530982	0.240959	SVZ
0.586232	-0.319789	0.04	0.099	1	DS_vs_WT	Gsr	0.883936	FALSE	Microglia_2	0.367159	0.0953503	SVZ
0.621474	-0.320863	0.04	0.085	1	DS_vs_WT	Chek2	0.892991	FALSE	Microglia_2	0.318745	0.0557751	SVZ
0.68435	-0.325713	0.24	0.324	1	DS_vs_WT	Tnfrsf1a	0.930172	FALSE	Microglia_2	1.40288	0.917269	SVZ
0.653474	-0.326234	0.16	0.225	1	DS_vs_WT	Ifngr1	0.919398	FALSE	Microglia_2	0.797159	0.433442	SVZ
0.113535	-0.332752	0	0.07	1	DS_vs_WT	Sst	0.473329	FALSE	Microglia_2	0.259414	0	SVZ
0.113535	-0.333283	0	0.07	1	DS_vs_WT	Nlrp1a	0.473329	FALSE	Microglia_2	0.259877	0	SVZ
0.609199	-0.33567	0.04	0.099	1	DS_vs_WT	Sorl1	0.883936	FALSE	Microglia_2	0.442456	0.143025	SVZ
0.166327	-0.339413	0	0.056	1	DS_vs_WT	Ptprd	0.535139	FALSE	Microglia_2	0.265242	0	SVZ
0.0176539	-0.340239	0.08	0.296	1	DS_vs_WT	Siglech	0.324347	FALSE	Microglia_2	1.10911	0.666007	SVZ
0.565475	-0.348774	0.4	0.521	1	DS_vs_WT	Fcgr3	0.883936	FALSE	Microglia_2	3.75416	2.73321	SVZ
0.288467	-0.353121	0.24	0.408	1	DS_vs_WT	Gpx1	0.677668	FALSE	Microglia_2	1.96394	1.32043	SVZ
0.516204	-0.353175	0.04	0.113	1	DS_vs_WT	Cpt1c	0.875291	FALSE	Microglia_2	0.526338	0.194908	SVZ
0.0535403	-0.354263	0	0.099	1	DS_vs_WT	Sufu	0.440221	FALSE	Microglia_2	0.278332	0	SVZ
0.59286	-0.354419	0.08	0.127	1	DS_vs_WT	Traf5	0.883936	FALSE	Microglia_2	0.416611	0.108052	SVZ
0.609142	-0.35739	0.48	0.577	1	DS_vs_WT	Ctnnb1	0.883936	FALSE	Microglia_2	5.28192	3.90351	SVZ
0.414492	-0.393703	0.04	0.127	1	DS_vs_WT	Rnf5	0.834624	FALSE	Microglia_2	0.498092	0.140308	SVZ
0.552845	-0.395705	0.52	0.577	1	DS_vs_WT	Cd68	0.883936	FALSE	Microglia_2	5.03375	3.58636	SVZ
0.362647	-0.400515	0.08	0.169	1	DS_vs_WT	Dcx	0.771768	FALSE	Microglia_2	0.486791	0.126375	SVZ
0.126112	-0.40253	0.16	0.352	1	DS_vs_WT	Hif1a	0.491172	FALSE	Microglia_2	1.76964	1.09532	SVZ
0.685059	-0.404443	0.24	0.324	1	DS_vs_WT	Rcan1	0.930172	FALSE	Microglia_2	2.20802	1.42375	SVZ
0.444713	-0.405057	0.4	0.437	1	DS_vs_WT	Mtor	0.85427	FALSE	Microglia_2	2.20883	1.42333	SVZ
0.196314	-0.406789	0.12	0.282	1	DS_vs_WT	Atf6	0.597299	FALSE	Microglia_2	0.970652	0.486463	SVZ
0.583601	-0.406992	0.44	0.521	1	DS_vs_WT	Ep300	0.883936	FALSE	Microglia_2	3.9706	2.7488	SVZ
0.594496	-0.407308	0.4	0.479	1	DS_vs_WT	Dtx4	0.883936	FALSE	Microglia_2	2.89337	1.93571	SVZ
0.113535	-0.420307	0	0.07	1	DS_vs_WT	Ldlr	0.473329	FALSE	Microglia_2	0.338212	0	SVZ
0.408694	-0.426735	0.4	0.549	1	DS_vs_WT	Il6ra	0.834624	FALSE	Microglia_2	3.51568	2.35941	SVZ
0.755895	-0.44376	0.4	0.437	1	DS_vs_WT	Ikbkb	0.94327	FALSE	Microglia_2	2.89853	1.86626	SVZ
0.20541	-0.449217	0.04	0.155	1	DS_vs_WT	Ogt	0.601995	FALSE	Microglia_2	0.43039	0.0476752	SVZ
0.0535403	-0.451658	0	0.099	1	DS_vs_WT	Pdgfra	0.440221	FALSE	Microglia_2	0.367611	0	SVZ
0.154124	-0.455724	0.04	0.183	1	DS_vs_WT	Aldh9a1	0.535139	FALSE	Microglia_2	0.563899	0.140308	SVZ
0.0778742	-0.464782	0	0.085	1	DS_vs_WT	Aqp4	0.470424	FALSE	Microglia_2	0.380108	0	SVZ
0.0778742	-0.466695	0	0.085	1	DS_vs_WT	Plaur	0.470424	FALSE	Microglia_2	0.38194	0	SVZ
0.0778742	-0.471057	0	0.085	1	DS_vs_WT	Creb1	0.470424	FALSE	Microglia_2	0.386124	0	SVZ
0.113535	-0.483009	0	0.07	1	DS_vs_WT	Hes1	0.473329	FALSE	Microglia_2	0.397656	0	SVZ
0.166327	-0.491541	0	0.056	1	DS_vs_WT	Hus1	0.535139	FALSE	Microglia_2	0.405945	0	SVZ
0.279064	-0.498455	0.12	0.268	1	DS_vs_WT	Nfe2l2	0.671568	FALSE	Microglia_2	0.962758	0.389366	SVZ
0.230486	-0.505108	0.04	0.155	1	DS_vs_WT	Apoc1	0.631703	FALSE	Microglia_2	0.543893	0.0878389	SVZ
0.509155	-0.516964	0.12	0.183	1	DS_vs_WT	Trp53	0.875291	FALSE	Microglia_2	0.932857	0.350759	SVZ
0.602255	-0.518082	0.32	0.394	1	DS_vs_WT	Cux1	0.883936	FALSE	Microglia_2	2.24776	1.26791	SVZ
0.626479	-0.519586	0.04	0.099	1	DS_vs_WT	Lhx6	0.895835	FALSE	Microglia_2	0.992362	0.389815	SVZ
0.0119253	-0.521175	0	0.155	1	DS_vs_WT	Dgat1	0.271531	FALSE	Microglia_2	0.435124	0	SVZ
0.27117	-0.521267	0.08	0.169	1	DS_vs_WT	Fto	0.668886	FALSE	Microglia_2	0.571917	0.095248	SVZ
0.0772503	-0.524642	0.12	0.324	1	DS_vs_WT	Glb1	0.470424	FALSE	Microglia_2	1.60994	0.814252	SVZ
0.305682	-0.528795	0.08	0.197	1	DS_vs_WT	Myd88	0.696015	FALSE	Microglia_2	0.739709	0.20585	SVZ
0.371958	-0.52907	0.36	0.437	1	DS_vs_WT	Npc1	0.775349	FALSE	Microglia_2	2.62181	1.50992	SVZ
0.451553	-0.54734	0.08	0.099	1	DS_vs_WT	Vcan	0.85427	FALSE	Microglia_2	0.61242	0.103348	SVZ
0.0253329	-0.557019	0	0.127	1	DS_vs_WT	Map2	0.338365	FALSE	Microglia_2	0.471226	0	SVZ
0.199451	-0.559732	0.08	0.225	1	DS_vs_WT	Arf1	0.597299	FALSE	Microglia_2	0.744015	0.183189	SVZ
0.413438	-0.560706	0.2	0.31	1	DS_vs_WT	Icam1	0.834624	FALSE	Microglia_2	1.34277	0.58833	SVZ
0.675081	-0.568653	0.24	0.254	1	DS_vs_WT	Mki67	0.925111	FALSE	Microglia_2	2.47274	1.34148	SVZ
0.0820077	-0.5722	0.08	0.282	1	DS_vs_WT	Tbk1	0.473329	FALSE	Microglia_2	0.908046	0.283333	SVZ
0.0937718	-0.581264	0.88	0.944	1	DS_vs_WT	Csf1r	0.473329	FALSE	Microglia_2	24.0924	15.7712	SVZ
0.320296	-0.585845	0.08	0.183	1	DS_vs_WT	Eif2ak2	0.712838	FALSE	Microglia_2	0.702753	0.134474	SVZ
0.2366	-0.604656	0.04	0.155	1	DS_vs_WT	Sirt5	0.633822	FALSE	Microglia_2	0.605429	0.0557751	SVZ
0.0535403	-0.612702	0	0.099	1	DS_vs_WT	Lhx2	0.440221	FALSE	Microglia_2	0.529121	0	SVZ
0.428954	-0.615841	0.24	0.31	1	DS_vs_WT	B2m	0.84599	FALSE	Microglia_2	1.71484	0.771568	SVZ
0.0951829	-0.623201	0.04	0.197	1	DS_vs_WT	Nlrp3	0.473329	FALSE	Microglia_2	0.613565	0.0475729	SVZ
0.0874302	-0.648874	0.12	0.338	1	DS_vs_WT	Itgam	0.473329	FALSE	Microglia_2	1.33356	0.488291	SVZ
0.0438884	-0.656076	0.6	0.845	1	DS_vs_WT	Cx3cr1	0.433088	FALSE	Microglia_2	14.0627	8.55881	SVZ
0.282911	-0.657157	0.12	0.225	1	DS_vs_WT	Tlr2	0.675335	FALSE	Microglia_2	1.25259	0.428427	SVZ
0.298636	-0.657702	0.32	0.437	1	DS_vs_WT	Apc	0.687196	FALSE	Microglia_2	2.16963	1.00919	SVZ
0.365025	-0.667547	0.28	0.408	1	DS_vs_WT	Aif1	0.771768	FALSE	Microglia_2	1.95942	0.863178	SVZ
0.118551	-0.671333	0.04	0.197	1	DS_vs_WT	Topbp1	0.478293	FALSE	Microglia_2	0.91031	0.199534	SVZ
0.189126	-0.686613	0.04	0.169	1	DS_vs_WT	Fbln1	0.583137	FALSE	Microglia_2	0.835325	0.140308	SVZ
0.227675	-0.691094	0.12	0.282	1	DS_vs_WT	Psme1	0.631703	FALSE	Microglia_2	1.59418	0.606791	SVZ
0.248767	-0.691424	0.24	0.338	1	DS_vs_WT	Aars	0.640417	FALSE	Microglia_2	1.51727	0.558803	SVZ
0.299487	-0.705102	0.04	0.127	1	DS_vs_WT	Clspn	0.687196	FALSE	Microglia_2	0.721188	0.0557751	SVZ
0.250282	-0.712863	0.44	0.549	1	DS_vs_WT	Gba	0.640417	FALSE	Microglia_2	4.24065	2.19736	SVZ
0.0905848	-0.712898	0.4	0.648	1	DS_vs_WT	Sall1	0.473329	FALSE	Microglia_2	7.7212	4.32075	SVZ
0.208272	-0.71831	0.04	0.155	1	DS_vs_WT	Gsto1	0.60428	FALSE	Microglia_2	0.789771	0.0878389	SVZ
0.210273	-0.72544	0.36	0.535	1	DS_vs_WT	Lmnb1	0.60428	FALSE	Microglia_2	3.52499	1.73677	SVZ
0.163775	-0.77491	0.12	0.296	1	DS_vs_WT	Pdia3	0.535139	FALSE	Microglia_2	1.49956	0.460803	SVZ
0.220118	-0.775359	0.32	0.451	1	DS_vs_WT	Txnrd1	0.62649	FALSE	Microglia_2	2.83802	1.24234	SVZ
0.203247	-0.815383	0.04	0.155	1	DS_vs_WT	Tnc	0.601611	FALSE	Microglia_2	0.857917	0.0557751	SVZ
0.108275	-0.832435	0.04	0.197	1	DS_vs_WT	Jak2	0.473329	FALSE	Microglia_2	1.06097	0.157399	SVZ
0.450256	-0.842336	0.44	0.507	1	DS_vs_WT	Fabp7	0.85427	FALSE	Microglia_2	5.04439	2.3712	SVZ
0.043894	-0.856246	0.24	0.479	1	DS_vs_WT	Nfkb1	0.433088	FALSE	Microglia_2	2.19547	0.76514	SVZ
0.369455	-0.884149	0.04	0.127	1	DS_vs_WT	Fgfr2	0.775349	FALSE	Microglia_2	0.981716	0.0737081	SVZ
0.0624197	-0.919949	0.04	0.225	1	DS_vs_WT	Lamp2	0.461906	FALSE	Microglia_2	1.17729	0.150758	SVZ
0.0229459	-0.938654	0.72	0.859	1	DS_vs_WT	Gusb	0.338365	FALSE	Microglia_2	14.9869	7.34067	SVZ
0.0163497	-0.972266	0.08	0.338	1	DS_vs_WT	Npc2	0.322635	FALSE	Microglia_2	1.20006	0.121383	SVZ
0.0473472	-0.979984	0.04	0.225	1	DS_vs_WT	Tle4	0.440221	FALSE	Microglia_2	1.06648	0.0476752	SVZ
0.00255382	-1.00437	0	0.211	1	DS_vs_WT	Ccna2	0.151186	FALSE	Microglia_2	1.00607	0	SVZ
0.00515834	-1.00906	0.64	0.901	1	DS_vs_WT	Lamp1	0.218124	FALSE	Microglia_2	22.1491	10.5021	SVZ
0.0230813	-1.10132	0.04	0.268	1	DS_vs_WT	Clu	0.338365	FALSE	Microglia_2	1.38484	0.11155	SVZ
0.00329625	-1.19666	0.04	0.338	1	DS_vs_WT	Nras	0.162615	FALSE	Microglia_2	1.47247	0.0786994	SVZ
0.0103592	-1.31952	0.08	0.352	1	DS_vs_WT	Cd33	0.271531	FALSE	Microglia_2	2.10789	0.245238	SVZ
0.0264702	-1.38359	0.12	0.38	1	DS_vs_WT	Gfap	0.338365	FALSE	Microglia_2	3.23339	0.622508	SVZ
0.0156153	-1.4329	0.36	0.634	1	DS_vs_WT	Hsp90b1	0.322635	FALSE	Microglia_2	8.28718	2.43984	SVZ
0.000222127	-1.4862	0	0.296	0.111286	DS_vs_WT	Slc1a3	0.0328748	TRUE	Microglia_2	1.80151	0	SVZ
0.00172079	-2.17596	0	0.225	0.862115	DS_vs_WT	Ccl3	0.127338	FALSE	Microglia_2	3.51886	0	SVZ
p_val	avg_log2FC	pct.1	pct.2	p_val_adj	comparison	gene	FDR	sig	celltype	exp.1	exp.2	SVZ
2.72109e-20	1.07328	0.157	0.053	1.36327e-17	DS_vs_WT	Ccn2	7.07484e-19	TRUE	NSC_1	0.661892	2.49698	SVZ
3.28595e-22	0.877985	0.233	0.095	1.64626e-19	DS_vs_WT	Fzd8	1.06793e-20	TRUE	NSC_1	1.12438	2.90419	SVZ
7.07035e-18	0.773141	0.275	0.14	3.54224e-15	DS_vs_WT	Igfbp2	1.31306e-16	TRUE	NSC_1	1.73011	3.66573	SVZ
1.59734e-24	0.752519	0.515	0.341	8.0027e-22	DS_vs_WT	Dkk3	6.92183e-23	TRUE	NSC_1	4.80311	8.77668	SVZ
1.99999e-15	0.731815	0.181	0.077	1.002e-12	DS_vs_WT	Mdga1	2.59999e-14	TRUE	NSC_1	0.894106	2.14559	SVZ
1.55825e-24	0.714391	0.604	0.423	7.80682e-22	DS_vs_WT	Tnc	6.92183e-23	TRUE	NSC_1	8.13087	13.9818	SVZ
1.82758e-39	0.696886	0.808	0.644	9.15616e-37	DS_vs_WT	App	2.37585e-37	TRUE	NSC_1	12.2902	20.5434	SVZ
9.93505e-15	0.666464	0.344	0.212	4.97746e-12	DS_vs_WT	Bcan	1.17414e-13	TRUE	NSC_1	2.73869	4.93396	SVZ
1.33565e-19	0.535752	0.68	0.525	6.69159e-17	DS_vs_WT	Aldh1l1	2.8939e-18	TRUE	NSC_1	9.7865	14.6372	SVZ
3.14052e-09	0.533882	0.214	0.125	1.5734e-06	DS_vs_WT	Notch3	2.91619e-08	TRUE	NSC_1	1.50238	2.62299	SVZ
3.40627e-08	0.457901	0.076	0.028	1.70654e-05	DS_vs_WT	Gli1	2.46009e-07	TRUE	NSC_1	0.32583	0.821083	SVZ
8.91991e-08	0.455815	0.257	0.168	4.46888e-05	DS_vs_WT	Dvl1	5.27086e-07	TRUE	NSC_1	1.91478	2.99779	SVZ
3.16459e-07	0.451231	0.207	0.129	0.000158546	DS_vs_WT	Pink1	1.71415e-06	TRUE	NSC_1	1.44171	2.33832	SVZ
2.45355e-09	0.451164	0.397	0.284	1.22923e-06	DS_vs_WT	Notch2	2.45355e-08	TRUE	NSC_1	4.27003	6.20488	SVZ
1.52486e-07	0.43341	0.405	0.311	7.63956e-05	DS_vs_WT	Notch1	8.61878e-07	TRUE	NSC_1	4.40345	6.29694	SVZ
4.25714e-08	0.417936	0.181	0.105	2.13283e-05	DS_vs_WT	Acads	2.91278e-07	TRUE	NSC_1	1.15766	1.88266	SVZ
1.16448e-05	0.414507	0.137	0.08	0.00583402	DS_vs_WT	Vars	4.73068e-05	TRUE	NSC_1	0.946191	1.59397	SVZ
7.26383e-06	0.407637	0.199	0.13	0.00363918	DS_vs_WT	Lrp5	3.14766e-05	TRUE	NSC_1	1.4566	2.25871	SVZ
6.88468e-17	0.3978	0.867	0.771	3.44922e-14	DS_vs_WT	Ncan	1.11876e-15	TRUE	NSC_1	20.1074	26.809	SVZ
1.03157e-05	0.388922	0.057	0.022	0.00516818	DS_vs_WT	Olig2	4.32595e-05	TRUE	NSC_1	0.221952	0.600041	SVZ
6.79625e-08	0.388048	0.428	0.323	3.40492e-05	DS_vs_WT	Pou3f3	4.2072e-07	TRUE	NSC_1	4.38944	6.05274	SVZ
3.53763e-09	0.377463	0.601	0.496	1.77235e-06	DS_vs_WT	Lrp1	3.06594e-08	TRUE	NSC_1	7.86429	10.5152	SVZ
5.99681e-06	0.358489	0.059	0.023	0.0030044	DS_vs_WT	Fzd7	2.68823e-05	TRUE	NSC_1	0.253459	0.607038	SVZ
2.85696e-05	0.340558	0.194	0.13	0.0143134	DS_vs_WT	Pdgfrb	0.000106116	TRUE	NSC_1	1.67031	2.38128	SVZ
0.000103636	0.338022	0.172	0.115	0.0519214	DS_vs_WT	Mdk	0.000364125	TRUE	NSC_1	1.33506	1.95157	SVZ
0.00172199	0.334101	0.176	0.128	0.862716	DS_vs_WT	Vegfa	0.00447717	TRUE	NSC_1	1.47619	2.12147	SVZ
2.03251e-06	0.32794	0.337	0.248	0.00101829	DS_vs_WT	Fbln2	1.01626e-05	TRUE	NSC_1	3.41854	4.54624	SVZ
0.0059297	0.295574	0.092	0.061	1	DS_vs_WT	Rcan1	0.0135239	TRUE	NSC_1	0.611753	0.978223	SVZ
0.000315091	0.280734	0.3	0.232	0.157861	DS_vs_WT	Sall1	0.0009526	TRUE	NSC_1	2.9327	3.77749	SVZ
0.000138219	0.276231	0.365	0.289	0.0692478	DS_vs_WT	Nlgn2	0.00046073	TRUE	NSC_1	3.67715	4.66416	SVZ
0.00552134	0.274353	0.09	0.058	1	DS_vs_WT	Irf3	0.0128174	TRUE	NSC_1	0.592839	0.926462	SVZ
0.0126489	0.263964	0.058	0.035	1	DS_vs_WT	Fbln1	0.0252979	TRUE	NSC_1	0.35385	0.625667	SVZ
0.00800929	0.261842	0.082	0.052	1	DS_vs_WT	Cnp	0.0167937	TRUE	NSC_1	0.586459	0.902179	SVZ
4.49867e-06	0.260463	0.282	0.205	0.00225384	DS_vs_WT	Gli3	2.16603e-05	TRUE	NSC_1	2.65865	3.38257	SVZ
0.021308	0.25836	0.096	0.068	1	DS_vs_WT	Psme1	0.0389861	TRUE	NSC_1	0.673181	1.00132	SVZ
0.000507347	0.256363	0.164	0.115	0.254181	DS_vs_WT	Pld3	0.00146567	TRUE	NSC_1	1.29724	1.74397	SVZ
0.000135459	0.234539	0.099	0.059	0.0678651	DS_vs_WT	Dyrk1a	0.00046073	TRUE	NSC_1	0.643239	0.933321	SVZ
0.00615156	0.233771	0.052	0.029	1	DS_vs_WT	H2afx	0.013788	TRUE	NSC_1	0.311633	0.542356	SVZ
1.55397e-05	0.233317	0.155	0.104	0.00778537	DS_vs_WT	Otx1	6.12169e-05	TRUE	NSC_1	1.20049	1.58675	SVZ
0.000264007	0.216802	0.093	0.057	0.132268	DS_vs_WT	Aldh2	0.000817165	TRUE	NSC_1	0.687303	0.960906	SVZ
1.82009e-06	0.21522	0.094	0.054	0.000911867	DS_vs_WT	Kif7	9.46449e-06	TRUE	NSC_1	0.617672	0.877925	SVZ
0.000707319	0.213699	0.259	0.201	0.354367	DS_vs_WT	Lmnb1	0.00199895	TRUE	NSC_1	2.65249	3.23564	SVZ
0.0256957	0.211959	0.179	0.141	1	DS_vs_WT	Dtx4	0.0440164	TRUE	NSC_1	1.74265	2.1767	SVZ
0.0961643	0.204246	0.147	0.125	1	DS_vs_WT	Gabbr1	0.142061	FALSE	NSC_1	1.35621	1.71456	SVZ
0.0285502	0.202258	0.067	0.044	1	DS_vs_WT	Trp53	0.0482016	TRUE	NSC_1	0.46395	0.684271	SVZ
0.00211766	0.194798	0.057	0.031	1	DS_vs_WT	Sufu	0.00519425	TRUE	NSC_1	0.306705	0.495608	SVZ
0.10303	0.193089	0.087	0.065	1	DS_vs_WT	Aqp4	0.150493	FALSE	NSC_1	0.744824	0.994698	SVZ
0.0175042	0.192814	0.062	0.039	1	DS_vs_WT	Vars2	0.0339634	TRUE	NSC_1	0.395993	0.595607	SVZ
3.81415e-05	0.184493	0.211	0.156	0.0191089	DS_vs_WT	Tle1	0.000137733	TRUE	NSC_1	1.999	2.40811	SVZ
0.0195301	0.182422	0.153	0.118	1	DS_vs_WT	Foxo1	0.0373369	TRUE	NSC_1	1.41448	1.73993	SVZ
0.0630612	0.18242	0.064	0.044	1	DS_vs_WT	Ikbkg	0.0975948	FALSE	NSC_1	0.453472	0.64938	SVZ
0.000219994	0.177789	0.11	0.073	0.110217	DS_vs_WT	Arx	0.000697544	TRUE	NSC_1	0.875059	1.12097	SVZ
0.000887427	0.160423	0.05	0.027	0.444601	DS_vs_WT	Tapbp	0.00245458	TRUE	NSC_1	0.312714	0.467108	SVZ
0.129374	0.1579	0.142	0.116	1	DS_vs_WT	Axin2	0.182811	FALSE	NSC_1	1.34661	1.61802	SVZ
0.0148247	0.156834	0.205	0.165	1	DS_vs_WT	Tubb3	0.0292001	TRUE	NSC_1	2.61175	3.02651	SVZ
0.0843644	0.147702	0.107	0.084	1	DS_vs_WT	Ascl1	0.126062	FALSE	NSC_1	1.0564	1.27809	SVZ
0.0474145	0.147546	0.071	0.05	1	DS_vs_WT	Ldlr	0.0751693	FALSE	NSC_1	0.528046	0.692592	SVZ
0.00663275	0.132128	0.178	0.141	1	DS_vs_WT	Gli2	0.0145742	TRUE	NSC_1	1.70827	1.96802	SVZ
0.00178869	0.128305	0.088	0.061	0.896132	DS_vs_WT	Hsf1	0.0045594	TRUE	NSC_1	0.740573	0.902462	SVZ
0.112547	0.120176	0.055	0.04	1	DS_vs_WT	Optn	0.162568	FALSE	NSC_1	0.41557	0.538537	SVZ
0.0240218	0.119813	0.251	0.212	1	DS_vs_WT	Eif4g1	0.0422005	TRUE	NSC_1	2.62812	2.94229	SVZ
0.0116635	0.114876	0.131	0.102	1	DS_vs_WT	Gsk3b	0.0236914	TRUE	NSC_1	1.21913	1.40306	SVZ
0.0643753	0.112515	0.153	0.126	1	DS_vs_WT	Ikbkb	0.0984563	FALSE	NSC_1	1.39502	1.58928	SVZ
0.0491572	0.111868	0.126	0.101	1	DS_vs_WT	Mapt	0.0769931	FALSE	NSC_1	1.07155	1.23857	SVZ
0.00714601	0.106308	0.119	0.092	1	DS_vs_WT	Lrp6	0.0152292	TRUE	NSC_1	1.06768	1.2258	SVZ
0.00962084	0.105229	0.054	0.036	1	DS_vs_WT	Qars	0.0198525	TRUE	NSC_1	0.399948	0.505875	SVZ
0.455702	0.102575	0.196	0.177	1	DS_vs_WT	Ep300	0.515142	FALSE	NSC_1	2.12277	2.35288	SVZ
0.297781	0.100638	0.053	0.041	1	DS_vs_WT	Sox5	0.35844	FALSE	NSC_1	0.452225	0.557145	SVZ
0.25748	0.0952166	0.196	0.173	1	DS_vs_WT	Tle3	0.323128	FALSE	NSC_1	2.07697	2.28689	SVZ
0.234191	0.0941734	0.064	0.05	1	DS_vs_WT	Psmb2	0.304448	FALSE	NSC_1	0.577246	0.683637	SVZ
0.0331746	0.0857351	0.069	0.052	1	DS_vs_WT	Ptch1	0.0545912	FALSE	NSC_1	0.610388	0.708989	SVZ
0.00211068	0.0841744	0.269	0.225	1	DS_vs_WT	Ctnnb1	0.00519425	FALSE	NSC_1	3.26862	3.52508	SVZ
0.0317752	0.0834287	0.054	0.039	1	DS_vs_WT	Prdx5	0.0529587	FALSE	NSC_1	0.434795	0.520213	SVZ
0.655687	0.0778287	0.051	0.043	1	DS_vs_WT	Ythdf1	0.682129	FALSE	NSC_1	0.45036	0.530751	SVZ
0.599292	0.0776951	0.107	0.096	1	DS_vs_WT	Mavs	0.63859	FALSE	NSC_1	1.05616	1.16993	SVZ
0.742587	0.0693156	0.061	0.056	1	DS_vs_WT	Gba	0.75419	FALSE	NSC_1	0.549728	0.626004	SVZ
0.498949	0.0662118	0.067	0.057	1	DS_vs_WT	Hif1a	0.549689	FALSE	NSC_1	0.624882	0.701192	SVZ
0.708651	0.064866	0.38	0.37	1	DS_vs_WT	Clu	0.725391	FALSE	NSC_1	5.74293	6.05303	SVZ
0.398131	0.0643038	0.07	0.059	1	DS_vs_WT	Nrf1	0.462117	FALSE	NSC_1	0.627368	0.701544	SVZ
0.565036	0.0597384	0.077	0.068	1	DS_vs_WT	Nfkb1	0.607064	FALSE	NSC_1	0.714436	0.786917	SVZ
0.224899	0.0567772	0.125	0.109	1	DS_vs_WT	Aars	0.295322	FALSE	NSC_1	1.20465	1.29314	SVZ
0.0257326	0.056635	0.111	0.092	1	DS_vs_WT	Smurf1	0.0440164	FALSE	NSC_1	1.02585	1.10696	SVZ
0.140003	0.0484588	0.136	0.119	1	DS_vs_WT	Bcl2l2	0.195702	FALSE	NSC_1	1.34553	1.42565	SVZ
0.118611	0.045616	0.08	0.065	1	DS_vs_WT	Mki67	0.169444	FALSE	NSC_1	0.819591	0.878043	SVZ
0.655893	0.0238117	0.198	0.206	1	DS_vs_WT	Foxj1	0.682129	FALSE	NSC_1	3.223	3.29328	SVZ
0.0742401	0.0181697	0.264	0.24	1	DS_vs_WT	Mtor	0.112223	FALSE	NSC_1	2.96603	3.0163	SVZ
0.0215923	0.0164361	0.139	0.119	1	DS_vs_WT	Txnrd1	0.0389861	FALSE	NSC_1	1.47426	1.50261	SVZ
0.0451653	0.00810147	0.076	0.065	1	DS_vs_WT	Gstm1	0.0728794	FALSE	NSC_1	0.707386	0.717001	SVZ
1	0	1	1	1	DS_vs_WT	Unnamed: 0	1	FALSE	NSC_1	7.84094e-178	1.1962e-178	SVZ
0.613933	-0.0183563	0.066	0.062	1	DS_vs_WT	Aldh9a1	0.648872	FALSE	NSC_1	0.748418	0.726313	SVZ
0.83199	-0.0327452	0.067	0.068	1	DS_vs_WT	Arf1	0.83844	FALSE	NSC_1	0.733652	0.694746	SVZ
0.547061	-0.032912	0.055	0.053	1	DS_vs_WT	Sorl1	0.59265	FALSE	NSC_1	0.612406	0.576039	SVZ
0.310154	-0.0470239	0.056	0.054	1	DS_vs_WT	Slc7a2	0.369909	FALSE	NSC_1	0.598432	0.547172	SVZ
0.143087	-0.0482711	0.083	0.077	1	DS_vs_WT	Cux1	0.197886	FALSE	NSC_1	0.880148	0.818281	SVZ
0.411216	-0.0589856	0.072	0.073	1	DS_vs_WT	Npc1	0.473081	FALSE	NSC_1	0.771987	0.701	SVZ
0.706396	-0.0769008	0.058	0.063	1	DS_vs_WT	Nlgn1	0.725391	FALSE	NSC_1	0.708505	0.61982	SVZ
0.283223	-0.0783004	0.076	0.078	1	DS_vs_WT	Mapk14	0.344103	FALSE	NSC_1	0.822799	0.726506	SVZ
0.186503	-0.0789909	0.171	0.171	1	DS_vs_WT	Wnt7a	0.252556	FALSE	NSC_1	2.02361	1.86251	SVZ
0.377483	-0.0799698	0.075	0.077	1	DS_vs_WT	Sp1	0.442098	FALSE	NSC_1	0.876157	0.77499	SVZ
0.490316	-0.0880802	0.048	0.053	1	DS_vs_WT	Otud4	0.544796	FALSE	NSC_1	0.543604	0.452183	SVZ
0.279543	-0.0925578	0.115	0.115	1	DS_vs_WT	Prdx6	0.342836	FALSE	NSC_1	1.44881	1.29664	SVZ
0.480013	-0.0967811	0.081	0.086	1	DS_vs_WT	Psen1	0.537945	FALSE	NSC_1	0.934923	0.80938	SVZ
0.419085	-0.100241	0.057	0.059	1	DS_vs_WT	Dlg4	0.477904	FALSE	NSC_1	0.67994	0.567178	SVZ
0.258503	-0.106875	0.11	0.129	1	DS_vs_WT	Traf3	0.323128	FALSE	NSC_1	1.40326	1.23166	SVZ
0.515234	-0.107482	0.187	0.203	1	DS_vs_WT	Zhx2	0.56286	FALSE	NSC_1	2.52436	2.27133	SVZ
0.247449	-0.135145	0.068	0.076	1	DS_vs_WT	Cpt1c	0.316105	FALSE	NSC_1	0.816191	0.653784	SVZ
0.248021	-0.136838	0.044	0.052	1	DS_vs_WT	Mettl3	0.316105	FALSE	NSC_1	0.599689	0.454934	SVZ
0.323148	-0.147237	0.054	0.066	1	DS_vs_WT	Mecp2	0.381902	FALSE	NSC_1	0.729237	0.561463	SVZ
0.278803	-0.15363	0.1	0.114	1	DS_vs_WT	Jak1	0.342836	FALSE	NSC_1	1.34962	1.11227	SVZ
0.210339	-0.170057	0.089	0.109	1	DS_vs_WT	Ythdc1	0.279021	FALSE	NSC_1	1.18931	0.945872	SVZ
0.162173	-0.184584	0.041	0.055	1	DS_vs_WT	Fzd5	0.221921	FALSE	NSC_1	0.635891	0.439425	SVZ
0.188595	-0.18778	0.068	0.083	1	DS_vs_WT	Vcam1	0.252756	FALSE	NSC_1	0.982388	0.740449	SVZ
0.0454095	-0.22287	0.036	0.056	1	DS_vs_WT	Jak2	0.0728794	FALSE	NSC_1	0.60428	0.374642	SVZ
0.0208371	-0.249478	0.031	0.052	1	DS_vs_WT	Atf6	0.0386974	TRUE	NSC_1	0.559439	0.311802	SVZ
0.0227142	-0.259189	0.047	0.071	1	DS_vs_WT	Tle4	0.0404499	TRUE	NSC_1	0.750192	0.462386	SVZ
0.0203034	-0.25974	0.056	0.076	1	DS_vs_WT	Itch	0.0382528	TRUE	NSC_1	0.863523	0.556487	SVZ
0.00155956	-0.293732	0.287	0.329	0.78134	DS_vs_WT	Anxa6	0.00413761	TRUE	NSC_1	4.62159	3.58603	SVZ
0.00298492	-0.355799	0.06	0.088	1	DS_vs_WT	Fto	0.00705527	TRUE	NSC_1	1.08057	0.625837	SVZ
0.00262545	-0.362374	0.046	0.076	1	DS_vs_WT	Pdia3	0.00632053	TRUE	NSC_1	0.909486	0.485358	SVZ
0.0004918	-0.372873	0.053	0.092	0.246392	DS_vs_WT	Vcan	0.00145305	TRUE	NSC_1	1.0671	0.596304	SVZ
0.00123164	-0.389302	0.078	0.11	0.617053	DS_vs_WT	Rac1	0.0033357	TRUE	NSC_1	1.39919	0.831778	SVZ
0.00672655	-0.39767	0.145	0.162	1	DS_vs_WT	Gfap	0.0145742	TRUE	NSC_1	3.05207	2.07586	SVZ
0.000210518	-0.403315	0.102	0.145	0.105469	DS_vs_WT	Apc	0.000684182	TRUE	NSC_1	1.70402	1.04456	SVZ
1.96015e-05	-0.445776	0.046	0.091	0.00982036	DS_vs_WT	Nras	7.4947e-05	TRUE	NSC_1	1.04089	0.498402	SVZ
5.72731e-06	-0.477965	0.114	0.179	0.00286938	DS_vs_WT	Fgfr2	2.65911e-05	TRUE	NSC_1	2.22741	1.31724	SVZ
5.8577e-08	-0.523312	0.027	0.074	2.93471e-05	DS_vs_WT	Map2	3.80751e-07	TRUE	NSC_1	0.812404	0.261021	SVZ
4.37317e-09	-0.540975	0.27	0.363	2.19096e-06	DS_vs_WT	Lamp1	3.5532e-08	TRUE	NSC_1	5.74748	3.63759	SVZ
1.19909e-15	-0.555245	0.569	0.691	6.00743e-13	DS_vs_WT	Fabp7	1.73202e-14	TRUE	NSC_1	20.0419	13.3199	SVZ
8.38704e-09	-0.605647	0.142	0.224	4.20191e-06	DS_vs_WT	Hsp90b1	6.41362e-08	TRUE	NSC_1	2.97009	1.60905	SVZ
9.265e-12	-0.733779	0.116	0.198	4.64177e-09	DS_vs_WT	Slc1a3	1.00371e-10	TRUE	NSC_1	2.62171	1.17783	SVZ
p_val	avg_log2FC	pct.1	pct.2	p_val_adj	comparison	gene	FDR	sig	celltype	exp.1	exp.2	SVZ
2.12708e-27	1.01616	0.561	0.361	1.06567e-24	DS_vs_WT	Bcan	1.50314e-25	TRUE	NSC_2	2.9275	6.94347	SVZ
2.16929e-52	0.865761	0.882	0.752	1.08682e-49	DS_vs_WT	App	4.5989e-50	TRUE	NSC_2	11.2419	21.3084	SVZ
5.92856e-25	0.75604	0.739	0.556	2.97021e-22	DS_vs_WT	Dkk3	3.14214e-23	TRUE	NSC_2	6.1314	11.0439	SVZ
1.45617e-13	0.755035	0.331	0.208	7.29539e-11	DS_vs_WT	Mdga1	3.53427e-12	TRUE	NSC_2	1.22574	2.75631	SVZ
9.44673e-14	0.705953	0.423	0.307	4.73281e-11	DS_vs_WT	Dvl1	2.86101e-12	TRUE	NSC_2	1.83765	3.62883	SVZ
1.67994e-12	0.704522	0.337	0.191	8.41651e-10	DS_vs_WT	Fzd8	2.9679e-11	TRUE	NSC_2	1.20951	2.60062	SVZ
6.5855e-13	0.665505	0.48	0.318	3.29934e-10	DS_vs_WT	Notch3	1.26921e-11	TRUE	NSC_2	2.43622	4.45027	SVZ
9.49559e-12	0.653131	0.501	0.341	4.75729e-09	DS_vs_WT	Tnc	1.34204e-10	TRUE	NSC_2	3.24436	5.67458	SVZ
1.83371e-28	0.648011	0.879	0.78	9.18688e-26	DS_vs_WT	Lrp1	1.94373e-26	TRUE	NSC_2	10.7339	17.3871	SVZ
1.77249e-15	0.633701	0.704	0.559	8.88019e-13	DS_vs_WT	Notch1	6.26281e-14	TRUE	NSC_2	6.5301	10.6833	SVZ
5.40814e-08	0.573339	0.202	0.103	2.70948e-05	DS_vs_WT	Gli1	5.45965e-07	TRUE	NSC_2	0.610342	1.39613	SVZ
7.85999e-10	0.570181	0.451	0.303	3.93786e-07	DS_vs_WT	Cnp	9.80187e-09	TRUE	NSC_2	2.44781	4.11899	SVZ
1.93265e-09	0.537927	0.568	0.443	9.68258e-07	DS_vs_WT	Notch2	2.27623e-08	TRUE	NSC_2	4.3902	6.82595	SVZ
8.82135e-07	0.532333	0.181	0.095	0.00044195	DS_vs_WT	Olig2	8.13098e-06	TRUE	NSC_2	0.564162	1.2622	SVZ
7.83535e-09	0.532243	0.361	0.224	3.92551e-06	DS_vs_WT	Fbln2	8.7426e-08	TRUE	NSC_2	1.88515	3.17244	SVZ
2.54993e-05	0.502778	0.281	0.196	0.0127751	DS_vs_WT	Igfbp2	0.000158995	TRUE	NSC_2	1.39368	2.3917	SVZ
4.36654e-06	0.492176	0.175	0.098	0.00218764	DS_vs_WT	Ldlr	3.3061e-05	TRUE	NSC_2	0.52828	1.14963	SVZ
2.21617e-06	0.48708	0.079	0.027	0.0011103	DS_vs_WT	Thbs1	1.87931e-05	TRUE	NSC_2	0.163565	0.630859	SVZ
3.08664e-06	0.479648	0.089	0.031	0.0015464	DS_vs_WT	Ccn2	2.42358e-05	TRUE	NSC_2	0.243156	0.733461	SVZ
4.96423e-07	0.471627	0.379	0.319	0.000248708	DS_vs_WT	Vegfa	4.78372e-06	TRUE	NSC_2	2.21122	3.45291	SVZ
1.15392e-05	0.457064	0.346	0.293	0.00578112	DS_vs_WT	Gabbr1	7.6447e-05	TRUE	NSC_2	1.99716	3.11434	SVZ
2.39571e-19	0.453419	0.939	0.896	1.20025e-16	DS_vs_WT	Ncan	1.01578e-17	TRUE	NSC_2	23.5676	32.64	SVZ
1.5004e-13	0.427845	0.886	0.784	7.51699e-11	DS_vs_WT	Aldh1l1	3.53427e-12	TRUE	NSC_2	13.7538	18.8472	SVZ
1.10483e-05	0.427767	0.388	0.281	0.00553519	DS_vs_WT	Pdgfrb	7.5556e-05	TRUE	NSC_2	2.28788	3.4227	SVZ
7.21326e-06	0.426179	0.127	0.069	0.00361385	DS_vs_WT	Hras	5.09737e-05	TRUE	NSC_2	0.287161	0.72952	SVZ
2.29351e-05	0.39525	0.355	0.253	0.0114905	DS_vs_WT	Lrp5	0.000147341	TRUE	NSC_2	1.70584	2.55864	SVZ
1.49579e-06	0.393214	0.584	0.521	0.000749389	DS_vs_WT	Pou3f3	1.32128e-05	TRUE	NSC_2	4.77725	6.58736	SVZ
0.000174914	0.384687	0.151	0.088	0.0876318	DS_vs_WT	Ikbkg	0.000888808	TRUE	NSC_2	0.450694	0.893992	SVZ
0.000751585	0.381806	0.305	0.234	0.376544	DS_vs_WT	Gli2	0.00306415	TRUE	NSC_2	1.50249	2.26068	SVZ
0.000335149	0.375412	0.403	0.319	0.16791	DS_vs_WT	Gli3	0.00157892	TRUE	NSC_2	2.45252	3.47865	SVZ
4.38017e-05	0.37132	0.145	0.076	0.0219447	DS_vs_WT	Fzd7	0.000265313	TRUE	NSC_2	0.481704	0.916638	SVZ
0.000652881	0.368609	0.394	0.339	0.327094	DS_vs_WT	Ep300	0.00274309	TRUE	NSC_2	2.55275	3.58698	SVZ
0.000629892	0.366944	0.361	0.296	0.315576	DS_vs_WT	Pld3	0.00274309	TRUE	NSC_2	2.07476	2.96527	SVZ
0.000286884	0.365416	0.731	0.668	0.143729	DS_vs_WT	Foxj1	0.00140929	TRUE	NSC_2	10.4755	13.7833	SVZ
7.49589e-05	0.358807	0.463	0.413	0.0375544	DS_vs_WT	Foxo1	0.000441425	TRUE	NSC_2	3.38399	4.62187	SVZ
0.000566271	0.350596	0.268	0.189	0.283702	DS_vs_WT	Vars	0.00255424	TRUE	NSC_2	1.22639	1.83884	SVZ
0.00281564	0.318666	0.379	0.324	1	DS_vs_WT	Tle3	0.0104722	TRUE	NSC_2	2.4648	3.32122	SVZ
0.00015953	0.317908	0.598	0.521	0.0799245	DS_vs_WT	Sall1	0.000845508	TRUE	NSC_2	5.07289	6.56999	SVZ
0.00201323	0.305952	0.313	0.236	1	DS_vs_WT	Tle1	0.00776009	TRUE	NSC_2	1.63414	2.25641	SVZ
0.000176085	0.299945	0.676	0.632	0.0882183	DS_vs_WT	Clu	0.000888808	TRUE	NSC_2	8.01568	10.0992	SVZ
0.00444867	0.294835	0.454	0.387	1	DS_vs_WT	Mtor	0.0152116	TRUE	NSC_2	2.86881	3.74604	SVZ
0.00184318	0.290508	0.158	0.1	0.923431	DS_vs_WT	Kif7	0.00723617	TRUE	NSC_2	0.499084	0.833486	SVZ
0.0222857	0.283456	0.209	0.161	1	DS_vs_WT	Rcan1	0.061358	FALSE	NSC_2	0.981454	1.41164	SVZ
0.0101852	0.279013	0.391	0.332	1	DS_vs_WT	Pink1	0.0304122	TRUE	NSC_2	2.36546	3.08353	SVZ
0.009734	0.263837	0.254	0.231	1	DS_vs_WT	Mapt	0.0299074	TRUE	NSC_2	1.43185	1.91984	SVZ
0.0459093	0.259652	0.104	0.08	1	DS_vs_WT	Sufu	0.106954	FALSE	NSC_2	0.408518	0.686263	SVZ
0.0176436	0.25961	0.283	0.224	1	DS_vs_WT	Ikbkb	0.0498727	TRUE	NSC_2	1.44146	1.92281	SVZ
6.50126e-06	0.258815	0.065	0.018	0.00325713	DS_vs_WT	Cspg4	4.75265e-05	TRUE	NSC_2	0.0811127	0.293546	SVZ
0.0101305	0.251028	0.272	0.208	1	DS_vs_WT	Acads	0.0304122	TRUE	NSC_2	1.30932	1.74822	SVZ
0.167839	0.235692	0.278	0.241	1	DS_vs_WT	Tubb3	0.284656	FALSE	NSC_2	2.27378	2.85478	SVZ
0.0342717	0.231915	0.478	0.427	1	DS_vs_WT	Dtx4	0.0887463	FALSE	NSC_2	3.56626	4.36258	SVZ
0.0503792	0.229159	0.082	0.059	1	DS_vs_WT	Gpx1	0.116091	FALSE	NSC_2	0.301627	0.525704	SVZ
0.102636	0.228343	0.121	0.097	1	DS_vs_WT	Ifnar1	0.192556	FALSE	NSC_2	0.522002	0.783008	SVZ
0.00932852	0.227733	0.12	0.075	1	DS_vs_WT	Col1a2	0.0295171	TRUE	NSC_2	0.421804	0.664923	SVZ
0.00951942	0.224645	0.179	0.126	1	DS_vs_WT	Prdx5	0.0296782	TRUE	NSC_2	0.844443	1.15521	SVZ
0.0179394	0.222409	0.159	0.149	1	DS_vs_WT	Aqp4	0.0500415	FALSE	NSC_2	0.8854	1.19966	SVZ
0.0913381	0.222037	0.172	0.145	1	DS_vs_WT	Tapbp	0.177648	FALSE	NSC_2	0.797773	1.09689	SVZ
0.0629433	0.221773	0.102	0.07	1	DS_vs_WT	H2afx	0.136911	FALSE	NSC_2	0.419058	0.654857	SVZ
0.0639346	0.221702	0.134	0.115	1	DS_vs_WT	Vars2	0.136911	FALSE	NSC_2	0.603803	0.870208	SVZ
0.00328528	0.21491	0.082	0.042	1	DS_vs_WT	Mx1	0.011608	TRUE	NSC_2	0.198418	0.390922	SVZ
0.0637773	0.212698	0.082	0.072	1	DS_vs_WT	Arx	0.136911	FALSE	NSC_2	0.425722	0.652203	SVZ
0.102167	0.211839	0.283	0.244	1	DS_vs_WT	Mavs	0.192556	FALSE	NSC_2	1.58447	1.99324	SVZ
0.121904	0.207316	0.178	0.15	1	DS_vs_WT	Dyrk1a	0.224727	FALSE	NSC_2	0.854484	1.14107	SVZ
0.0785664	0.20246	0.107	0.075	1	DS_vs_WT	Optn	0.158629	FALSE	NSC_2	0.495256	0.720529	SVZ
0.147779	0.191033	0.168	0.138	1	DS_vs_WT	Irf3	0.258918	FALSE	NSC_2	0.766694	1.01682	SVZ
0.00614673	0.185234	0.536	0.532	1	DS_vs_WT	Nlgn2	0.019744	TRUE	NSC_2	4.51797	5.27394	SVZ
0.211763	0.173753	0.104	0.08	1	DS_vs_WT	Fbln1	0.322976	FALSE	NSC_2	0.491744	0.682671	SVZ
0.174196	0.170312	0.231	0.194	1	DS_vs_WT	Nfkb1	0.286275	FALSE	NSC_2	1.23812	1.51856	SVZ
0.155442	0.169183	0.063	0.045	1	DS_vs_WT	Atrip	0.267916	FALSE	NSC_2	0.236168	0.389973	SVZ
0.190658	0.16462	0.262	0.246	1	DS_vs_WT	Mdk	0.306208	FALSE	NSC_2	1.54874	1.85681	SVZ
0.273435	0.163338	0.117	0.101	1	DS_vs_WT	Nrf1	0.402546	FALSE	NSC_2	0.568759	0.756815	SVZ
0.275326	0.159086	0.096	0.078	1	DS_vs_WT	Gria1	0.402546	FALSE	NSC_2	0.403308	0.566905	SVZ
0.204088	0.157913	0.069	0.058	1	DS_vs_WT	Aldh4a1	0.316015	FALSE	NSC_2	0.286035	0.434793	SVZ
0.0539171	0.157238	0.061	0.035	1	DS_vs_WT	Ifnar2	0.1216	FALSE	NSC_2	0.168127	0.302637	SVZ
0.259747	0.152705	0.106	0.083	1	DS_vs_WT	Alkbh5	0.385079	FALSE	NSC_2	0.487484	0.653565	SVZ
0.200183	0.152433	0.051	0.04	1	DS_vs_WT	Cdkn1c	0.316015	FALSE	NSC_2	0.184182	0.316149	SVZ
0.348561	0.151086	0.104	0.087	1	DS_vs_WT	Trp53	0.48615	FALSE	NSC_2	0.476536	0.639552	SVZ
0.389002	0.147135	0.183	0.161	1	DS_vs_WT	Npc1	0.521253	FALSE	NSC_2	1.04276	1.26209	SVZ
0.173536	0.145162	0.068	0.055	1	DS_vs_WT	Tyk2	0.286275	FALSE	NSC_2	0.245062	0.376857	SVZ
0.222192	0.145134	0.054	0.043	1	DS_vs_WT	Otx1	0.334076	FALSE	NSC_2	0.227967	0.357927	SVZ
0.396221	0.133081	0.168	0.144	1	DS_vs_WT	Wnt7b	0.524992	FALSE	NSC_2	0.971849	1.16239	SVZ
0.0577558	0.129696	0.102	0.07	1	DS_vs_WT	Cx3cl1	0.127544	FALSE	NSC_2	0.390348	0.521129	SVZ
0.209769	0.128623	0.055	0.05	1	DS_vs_WT	Ikbke	0.322253	FALSE	NSC_2	0.246473	0.362706	SVZ
0.435198	0.128048	0.092	0.08	1	DS_vs_WT	Cdkn1a	0.562573	FALSE	NSC_2	0.433777	0.566852	SVZ
0.149451	0.12628	0.086	0.061	1	DS_vs_WT	Tnfrsf1a	0.259701	FALSE	NSC_2	0.357647	0.481839	SVZ
0.200887	0.125344	0.055	0.038	1	DS_vs_WT	Dgat1	0.316015	FALSE	NSC_2	0.17044	0.276678	SVZ
0.0118956	0.122138	0.073	0.042	1	DS_vs_WT	Cd68	0.0350259	TRUE	NSC_2	0.23666	0.345915	SVZ
0.379147	0.118782	0.155	0.131	1	DS_vs_WT	Ythdf1	0.517867	FALSE	NSC_2	0.865922	1.02605	SVZ
0.456825	0.11568	0.384	0.364	1	DS_vs_WT	Traf3	0.582212	FALSE	NSC_2	2.68391	2.99147	SVZ
0.0714933	0.113062	0.192	0.201	1	DS_vs_WT	Cux1	0.148109	FALSE	NSC_2	1.13413	1.3081	SVZ
0.529092	0.104777	0.079	0.067	1	DS_vs_WT	Rfx5	0.655355	FALSE	NSC_2	0.361297	0.463841	SVZ
0.453364	0.103954	0.422	0.392	1	DS_vs_WT	Lmnb1	0.582212	FALSE	NSC_2	3.38478	3.71239	SVZ
0.547677	0.103445	0.09	0.082	1	DS_vs_WT	Gsr	0.667285	FALSE	NSC_2	0.452724	0.560713	SVZ
0.531703	0.100757	0.158	0.138	1	DS_vs_WT	Qars	0.655355	FALSE	NSC_2	0.790857	0.9204	SVZ
0.403522	0.0946147	0.416	0.413	1	DS_vs_WT	Ctnnb1	0.531345	FALSE	NSC_2	4.0341	4.37532	SVZ
0.365152	0.0895552	0.45	0.447	1	DS_vs_WT	Eif4g1	0.502677	FALSE	NSC_2	3.67477	3.97415	SVZ
0.299319	0.0869962	0.134	0.135	1	DS_vs_WT	Psme1	0.43167	FALSE	NSC_2	0.721281	0.82827	SVZ
0.416873	0.0850969	0.1	0.101	1	DS_vs_WT	Mdm2	0.545538	FALSE	NSC_2	0.556668	0.65125	SVZ
0.647957	0.0848426	0.161	0.152	1	DS_vs_WT	Smurf1	0.734582	FALSE	NSC_2	0.852073	0.964257	SVZ
0.17345	0.0845114	0.087	0.065	1	DS_vs_WT	Nfe2l2	0.286275	FALSE	NSC_2	0.427978	0.514126	SVZ
0.666659	0.0820943	0.063	0.054	1	DS_vs_WT	Rad9a	0.747787	FALSE	NSC_2	0.313042	0.389925	SVZ
0.619042	0.0792649	0.066	0.055	1	DS_vs_WT	Traf2	0.717141	FALSE	NSC_2	0.332805	0.408081	SVZ
0.602238	0.0725906	0.209	0.207	1	DS_vs_WT	Txnrd1	0.705383	FALSE	NSC_2	1.36043	1.48223	SVZ
0.642099	0.0700057	0.289	0.289	1	DS_vs_WT	Axin2	0.731854	FALSE	NSC_2	1.99687	2.14588	SVZ
0.0404907	0.0662458	0.251	0.276	1	DS_vs_WT	Gstm1	0.0996853	FALSE	NSC_2	2.03406	2.17663	SVZ
0.68447	0.0618674	0.072	0.061	1	DS_vs_WT	Hes1	0.763724	FALSE	NSC_2	0.311034	0.368479	SVZ
0.790022	0.0591768	0.214	0.201	1	DS_vs_WT	Bcl2l2	0.842225	FALSE	NSC_2	1.22739	1.32065	SVZ
0.468669	0.0531918	0.059	0.046	1	DS_vs_WT	Npc2	0.584458	FALSE	NSC_2	0.240625	0.28722	SVZ
0.0719584	0.053146	0.172	0.191	1	DS_vs_WT	Hsf1	0.148109	FALSE	NSC_2	1.13253	1.21256	SVZ
0.750803	0.0504411	0.127	0.127	1	DS_vs_WT	Otud4	0.816258	FALSE	NSC_2	0.765762	0.82859	SVZ
0.633567	0.0466893	0.254	0.235	1	DS_vs_WT	Aldh2	0.726117	FALSE	NSC_2	1.56762	1.65207	SVZ
0.580158	0.0377425	0.116	0.121	1	DS_vs_WT	Csf2ra	0.697746	FALSE	NSC_2	0.673781	0.718147	SVZ
0.232534	0.0362295	0.159	0.175	1	DS_vs_WT	Sp1	0.347164	FALSE	NSC_2	1.08524	1.13827	SVZ
0.790579	0.0289625	0.079	0.071	1	DS_vs_WT	Cxcr4	0.842225	FALSE	NSC_2	0.367749	0.395484	SVZ
0.327814	0.0238189	0.236	0.258	1	DS_vs_WT	Ascl1	0.469571	FALSE	NSC_2	2.31011	2.36521	SVZ
0.458629	0.02275	0.051	0.057	1	DS_vs_WT	Rars	0.582212	FALSE	NSC_2	0.295966	0.316565	SVZ
0.970929	0.0115411	0.075	0.072	1	DS_vs_WT	Tbk1	0.987629	FALSE	NSC_2	0.455565	0.467256	SVZ
0.105033	0.00912143	0.145	0.167	1	DS_vs_WT	Arf1	0.195325	FALSE	NSC_2	1.05522	1.06825	SVZ
0.993652	0.0071413	0.099	0.099	1	DS_vs_WT	Rnf5	0.998361	FALSE	NSC_2	0.626752	0.634825	SVZ
0.330349	0.00610435	0.15	0.165	1	DS_vs_WT	Mecp2	0.470027	FALSE	NSC_2	0.959413	0.967722	SVZ
1	0	1	1	1	DS_vs_WT	Unnamed: 0	1	FALSE	NSC_2	8.93249e-178	1.15227e-178	SVZ
0.0251274	-0.0014102	0.066	0.088	1	DS_vs_WT	Cflar	0.0674305	FALSE	NSC_2	0.474546	0.473105	SVZ
0.969657	-0.00169682	0.055	0.057	1	DS_vs_WT	Fuca1	0.987629	FALSE	NSC_2	0.347612	0.346028	SVZ
0.725215	-0.0062687	0.09	0.084	1	DS_vs_WT	Sirt5	0.792503	FALSE	NSC_2	0.487456	0.481007	SVZ
0.806376	-0.00807495	0.265	0.276	1	DS_vs_WT	Aars	0.854758	FALSE	NSC_2	1.88279	1.8667	SVZ
0.126493	-0.00946646	0.039	0.054	1	DS_vs_WT	Ccna2	0.229202	FALSE	NSC_2	0.27089	0.262578	SVZ
0.980931	-0.0103628	0.054	0.056	1	DS_vs_WT	Irf2	0.990273	FALSE	NSC_2	0.263958	0.254912	SVZ
0.905859	-0.0111391	0.047	0.05	1	DS_vs_WT	Gstk1	0.936791	FALSE	NSC_2	0.282546	0.272682	SVZ
0.341636	-0.0123672	0.41	0.388	1	DS_vs_WT	Crym	0.481436	FALSE	NSC_2	3.96463	3.92225	SVZ
0.703228	-0.0146987	0.305	0.294	1	DS_vs_WT	Ptch1	0.780547	FALSE	NSC_2	2.64259	2.60567	SVZ
0.973653	-0.0185328	0.078	0.079	1	DS_vs_WT	Sirt3	0.987629	FALSE	NSC_2	0.375081	0.357529	SVZ
0.612064	-0.0253057	0.051	0.06	1	DS_vs_WT	Rela	0.712954	FALSE	NSC_2	0.353883	0.330342	SVZ
0.041727	-0.0257082	0.037	0.055	1	DS_vs_WT	Eif2ak2	0.0996853	FALSE	NSC_2	0.296241	0.273347	SVZ
0.951968	-0.0291859	0.118	0.12	1	DS_vs_WT	Atf6	0.979695	FALSE	NSC_2	0.766913	0.731527	SVZ
0.873848	-0.0326384	0.075	0.082	1	DS_vs_WT	Glb1	0.917108	FALSE	NSC_2	0.468892	0.436034	SVZ
0.597962	-0.0330599	0.045	0.055	1	DS_vs_WT	Sod2	0.704266	FALSE	NSC_2	0.31065	0.280957	SVZ
0.387605	-0.0436881	0.044	0.057	1	DS_vs_WT	Nbn	0.521253	FALSE	NSC_2	0.304895	0.265972	SVZ
0.895344	-0.0468785	0.276	0.283	1	DS_vs_WT	Gsk3b	0.930456	FALSE	NSC_2	2.00439	1.90833	SVZ
0.89245	-0.0473736	0.13	0.133	1	DS_vs_WT	Hif1a	0.930456	FALSE	NSC_2	0.883008	0.82218	SVZ
0.583585	-0.0566931	0.118	0.117	1	DS_vs_WT	Smpd1	0.697746	FALSE	NSC_2	0.703571	0.637925	SVZ
0.0866295	-0.0571918	0.078	0.103	1	DS_vs_WT	Rad50	0.17164	FALSE	NSC_2	0.59741	0.535323	SVZ
0.709181	-0.0576221	0.044	0.053	1	DS_vs_WT	Clspn	0.783054	FALSE	NSC_2	0.294601	0.243913	SVZ
0.783927	-0.0620684	0.068	0.072	1	DS_vs_WT	Sorl1	0.842225	FALSE	NSC_2	0.382398	0.324185	SVZ
0.718919	-0.0636636	0.048	0.057	1	DS_vs_WT	Smurf2	0.789693	FALSE	NSC_2	0.325747	0.268516	SVZ
0.201887	-0.0641116	0.394	0.433	1	DS_vs_WT	Zhx2	0.316015	FALSE	NSC_2	3.79177	3.58349	SVZ
0.813242	-0.0650551	0.099	0.105	1	DS_vs_WT	Sars	0.857748	FALSE	NSC_2	0.619586	0.548176	SVZ
0.551736	-0.0686229	0.048	0.06	1	DS_vs_WT	Ifit2	0.668389	FALSE	NSC_2	0.349053	0.286386	SVZ
0.585844	-0.0721649	0.047	0.058	1	DS_vs_WT	Acot2	0.697746	FALSE	NSC_2	0.371798	0.304868	SVZ
0.221912	-0.0769992	0.08	0.103	1	DS_vs_WT	Cd47	0.334076	FALSE	NSC_2	0.51653	0.437712	SVZ
0.538584	-0.0790889	0.044	0.056	1	DS_vs_WT	Braf	0.659999	FALSE	NSC_2	0.320702	0.25025	SVZ
0.762688	-0.0812397	0.083	0.093	1	DS_vs_WT	Egfr	0.824949	FALSE	NSC_2	0.738738	0.643533	SVZ
0.381072	-0.0837229	0.078	0.097	1	DS_vs_WT	Cux2	0.517867	FALSE	NSC_2	0.544553	0.45747	SVZ
0.661884	-0.0882462	0.279	0.297	1	DS_vs_WT	Wnt7a	0.74638	FALSE	NSC_2	2.17647	1.98799	SVZ
0.34291	-0.0899897	0.049	0.052	1	DS_vs_WT	Ifngr1	0.481436	FALSE	NSC_2	0.302988	0.224196	SVZ
0.63364	-0.0987333	0.106	0.118	1	DS_vs_WT	Gba	0.726117	FALSE	NSC_2	0.75043	0.634644	SVZ
0.0411157	-0.100775	0.096	0.131	1	DS_vs_WT	Gusb	0.0996853	FALSE	NSC_2	0.748345	0.630388	SVZ
0.461701	-0.111968	0.051	0.064	1	DS_vs_WT	Ifi27	0.582623	FALSE	NSC_2	0.380885	0.277768	SVZ
0.39094	-0.112857	0.116	0.138	1	DS_vs_WT	Dlg4	0.521253	FALSE	NSC_2	0.807631	0.671615	SVZ
0.364034	-0.11387	0.049	0.065	1	DS_vs_WT	Axin1	0.502677	FALSE	NSC_2	0.362009	0.25864	SVZ
0.59776	-0.115702	0.1	0.114	1	DS_vs_WT	Slc7a2	0.704266	FALSE	NSC_2	0.798183	0.659603	SVZ
0.293174	-0.118242	0.181	0.211	1	DS_vs_WT	Psen1	0.425704	FALSE	NSC_2	1.41601	1.22589	SVZ
0.464937	-0.122782	0.205	0.219	1	DS_vs_WT	Lrp6	0.583235	FALSE	NSC_2	1.4679	1.26656	SVZ
0.00235907	-0.124025	0.082	0.126	1	DS_vs_WT	Gad1	0.00893077	TRUE	NSC_2	0.838546	0.687095	SVZ
0.0396122	-0.134161	0.042	0.07	1	DS_vs_WT	Traf6	0.0996853	FALSE	NSC_2	0.403615	0.278974	SVZ
0.433253	-0.138715	0.142	0.159	1	DS_vs_WT	Vcam1	0.562573	FALSE	NSC_2	1.11615	0.922159	SVZ
0.0769077	-0.140816	0.039	0.064	1	DS_vs_WT	Cr1l	0.156773	FALSE	NSC_2	0.351866	0.226151	SVZ
0.0702309	-0.143255	0.09	0.124	1	DS_vs_WT	Nlgn1	0.147415	FALSE	NSC_2	0.794526	0.624896	SVZ
0.0402214	-0.143518	0.528	0.59	1	DS_vs_WT	Anxa6	0.0996853	FALSE	NSC_2	5.92246	5.26697	SVZ
0.0156183	-0.146337	0.054	0.088	1	DS_vs_WT	Tgfb2	0.0447443	TRUE	NSC_2	0.483348	0.340266	SVZ
0.00338395	-0.147458	0.035	0.07	1	DS_vs_WT	Syn1	0.0117606	TRUE	NSC_2	0.361303	0.229038	SVZ
0.204217	-0.152335	0.041	0.06	1	DS_vs_WT	Sirt1	0.316015	FALSE	NSC_2	0.390981	0.251594	SVZ
0.0343264	-0.154366	0.099	0.138	1	DS_vs_WT	Mettl3	0.0887463	FALSE	NSC_2	0.835579	0.649318	SVZ
0.0675256	-0.156009	0.03	0.053	1	DS_vs_WT	Creb1	0.143154	FALSE	NSC_2	0.30108	0.167725	SVZ
0.181129	-0.157153	0.045	0.065	1	DS_vs_WT	Topbp1	0.295379	FALSE	NSC_2	0.397351	0.253135	SVZ
0.0307325	-0.160564	0.075	0.112	1	DS_vs_WT	Wars	0.0814411	FALSE	NSC_2	0.649478	0.475747	SVZ
0.145087	-0.161215	0.102	0.133	1	DS_vs_WT	Crebbp	0.25632	FALSE	NSC_2	0.757404	0.571597	SVZ
0.187329	-0.166129	0.071	0.094	1	DS_vs_WT	Prkaa1	0.303159	FALSE	NSC_2	0.545018	0.376967	SVZ
0.00297013	-0.166702	0.12	0.175	1	DS_vs_WT	Cpt1c	0.0108563	TRUE	NSC_2	1.03911	0.816593	SVZ
0.140278	-0.173116	0.097	0.107	1	DS_vs_WT	Sox5	0.249907	FALSE	NSC_2	0.646807	0.460594	SVZ
0.0147667	-0.178052	0.038	0.071	1	DS_vs_WT	Galc	0.0428841	TRUE	NSC_2	0.354843	0.19754	SVZ
0.0932739	-0.189778	0.195	0.239	1	DS_vs_WT	Fto	0.179764	FALSE	NSC_2	1.65032	1.32364	SVZ
0.100988	-0.196409	0.299	0.348	1	DS_vs_WT	Prdx6	0.192556	FALSE	NSC_2	3.09781	2.57624	SVZ
0.0510394	-0.197286	0.134	0.178	1	DS_vs_WT	Psmb2	0.116348	FALSE	NSC_2	1.14192	0.868157	SVZ
0.00165507	-0.198697	0.203	0.276	0.829188	DS_vs_WT	Ythdc1	0.00662026	TRUE	NSC_2	1.761	1.40576	SVZ
0.080452	-0.204945	0.045	0.065	1	DS_vs_WT	Casp7	0.160904	FALSE	NSC_2	0.403499	0.217636	SVZ
0.16267	-0.209036	0.066	0.089	1	DS_vs_WT	Ccnd1	0.278112	FALSE	NSC_2	0.616666	0.398602	SVZ
0.0910882	-0.210643	0.054	0.08	1	DS_vs_WT	Gad2	0.177648	FALSE	NSC_2	0.561022	0.34896	SVZ
0.12854	-0.219691	0.103	0.13	1	DS_vs_WT	Acadl	0.230936	FALSE	NSC_2	0.912084	0.642001	SVZ
0.0555212	-0.224868	0.172	0.219	1	DS_vs_WT	Aldh9a1	0.1239	FALSE	NSC_2	1.50796	1.146	SVZ
0.00526251	-0.232892	0.138	0.197	1	DS_vs_WT	Fzd5	0.0174321	TRUE	NSC_2	1.36427	1.01182	SVZ
0.041849	-0.23958	0.205	0.256	1	DS_vs_WT	Tle4	0.0996853	FALSE	NSC_2	1.88873	1.44673	SVZ
0.000104012	-0.249561	0.02	0.061	0.0521099	DS_vs_WT	Ogt	0.000595959	TRUE	NSC_2	0.329186	0.118048	SVZ
0.000464124	-0.25395	0.109	0.174	0.232526	DS_vs_WT	Pdia3	0.00213901	TRUE	NSC_2	1.11474	0.773412	SVZ
0.126469	-0.269657	0.073	0.099	1	DS_vs_WT	Mki67	0.229202	FALSE	NSC_2	0.8776	0.557501	SVZ
0.0440257	-0.269667	0.135	0.174	1	DS_vs_WT	Mapk14	0.103705	FALSE	NSC_2	1.11281	0.752602	SVZ
0.0233767	-0.275743	0.252	0.309	1	DS_vs_WT	Apc	0.0635366	FALSE	NSC_2	2.2875	1.71556	SVZ
0.000292494	-0.286044	0.471	0.57	0.146539	DS_vs_WT	Lamp1	0.00140929	TRUE	NSC_2	7.20241	5.72719	SVZ
0.00540539	-0.293145	0.065	0.108	1	DS_vs_WT	Mapk1	0.0176299	TRUE	NSC_2	0.626015	0.327026	SVZ
0.00517177	-0.303816	0.104	0.158	1	DS_vs_WT	Itch	0.0174034	TRUE	NSC_2	0.956577	0.585037	SVZ
0.0370401	-0.304711	0.243	0.277	1	DS_vs_WT	Fgfr2	0.0946084	FALSE	NSC_2	2.69329	1.9901	SVZ
0.00317324	-0.307218	0.093	0.148	1	DS_vs_WT	Vcan	0.0114021	TRUE	NSC_2	0.989731	0.608098	SVZ
0.000659895	-0.307505	0.228	0.313	0.330608	DS_vs_WT	Jak1	0.00274309	TRUE	NSC_2	2.41173	1.75681	SVZ
0.000650243	-0.322215	0.099	0.163	0.325772	DS_vs_WT	Jak2	0.00274309	TRUE	NSC_2	1.0868	0.669109	SVZ
0.171021	-0.324226	0.068	0.079	1	DS_vs_WT	Gfap	0.286275	FALSE	NSC_2	0.858866	0.484726	SVZ
0.000115984	-0.338921	0.032	0.08	0.058108	DS_vs_WT	Csnk1a1	0.000647069	TRUE	NSC_2	0.478695	0.169104	SVZ
0.000151803	-0.446014	0.128	0.202	0.0760535	DS_vs_WT	Nras	0.000825188	TRUE	NSC_2	1.49922	0.834598	SVZ
1.67772e-08	-0.482809	0.018	0.082	8.40539e-06	DS_vs_WT	Lamp2	1.77839e-07	TRUE	NSC_2	0.545583	0.105993	SVZ
6.03017e-11	-0.544682	0.745	0.792	3.02111e-08	DS_vs_WT	Fabp7	7.98997e-10	TRUE	NSC_2	24.9597	16.7964	SVZ
2.74877e-06	-0.580868	0.176	0.261	0.00137713	DS_vs_WT	Rac1	2.2413e-05	TRUE	NSC_2	2.31917	1.21907	SVZ
3.12577e-12	-0.675226	0.25	0.414	1.56601e-09	DS_vs_WT	Hsp90b1	4.73331e-11	TRUE	NSC_2	3.98469	2.12158	SVZ
2.17342e-12	-0.712738	0.034	0.126	1.08888e-09	DS_vs_WT	Map2	3.54434e-11	TRUE	NSC_2	0.880806	0.147595	SVZ
5.04e-13	-0.718355	0.291	0.464	2.52504e-10	DS_vs_WT	Slc1a3	1.06848e-11	TRUE	NSC_2	4.97382	2.63083	SVZ
p_val	avg_log2FC	pct.1	pct.2	p_val_adj	comparison	gene	FDR	sig	celltype	exp.1	exp.2	SVZ
1.09843e-15	1.13338	0.26	0.111	5.50316e-13	DS_vs_WT	Ccn2	4.22897e-14	TRUE	NSC_3	0.76688	2.87605	SVZ
1.47723e-18	0.791137	0.553	0.351	7.40094e-16	DS_vs_WT	Igfbp2	8.53102e-17	TRUE	NSC_3	2.23579	4.59933	SVZ
2.00471e-27	0.690911	0.933	0.83	1.00436e-24	DS_vs_WT	Tnc	2.31544e-25	TRUE	NSC_3	13.4349	22.3022	SVZ
1.55328e-12	0.684994	0.322	0.175	7.78192e-10	DS_vs_WT	Mdga1	2.76006e-11	TRUE	NSC_3	0.761623	1.83215	SVZ
4.28131e-40	0.647779	0.962	0.927	2.14494e-37	DS_vs_WT	App	9.88982e-38	TRUE	NSC_3	15.702	25.1679	SVZ
1.29065e-15	0.643227	0.55	0.347	6.46615e-13	DS_vs_WT	Fzd8	4.25914e-14	TRUE	NSC_3	2.15397	3.92594	SVZ
6.36129e-14	0.639131	0.59	0.419	3.18701e-11	DS_vs_WT	Bcan	1.63273e-12	TRUE	NSC_3	2.71197	4.78099	SVZ
7.90471e-13	0.637024	0.198	0.076	3.96026e-10	DS_vs_WT	Gli1	1.52166e-11	TRUE	NSC_3	0.295287	1.01433	SVZ
5.18492e-11	0.5523	0.51	0.381	2.59764e-08	DS_vs_WT	Dvl1	6.30377e-10	TRUE	NSC_3	1.90613	3.26161	SVZ
5.51582e-17	0.511954	0.9	0.782	2.76343e-14	DS_vs_WT	Aldh1l1	2.54831e-15	TRUE	NSC_3	11.1806	16.3693	SVZ
1.90585e-07	0.492542	0.46	0.334	9.54833e-05	DS_vs_WT	Notch3	1.46751e-06	TRUE	NSC_3	2.0379	3.27409	SVZ
2.96763e-12	0.485905	0.775	0.64	1.48678e-09	DS_vs_WT	Dkk3	4.57015e-11	TRUE	NSC_3	5.91836	8.68891	SVZ
2.5625e-10	0.462817	0.548	0.381	1.28381e-07	DS_vs_WT	Lrp5	2.95969e-09	TRUE	NSC_3	2.12891	3.31236	SVZ
3.5096e-06	0.450286	0.418	0.312	0.00175831	DS_vs_WT	Otx1	2.13346e-05	TRUE	NSC_3	1.67405	2.65358	SVZ
1.43493e-05	0.384647	0.518	0.42	0.00718899	DS_vs_WT	Gli2	7.70857e-05	TRUE	NSC_3	2.41344	3.45639	SVZ
0.000152976	0.371757	0.274	0.187	0.0766409	DS_vs_WT	Dyrk1a	0.000654397	TRUE	NSC_3	0.909889	1.47126	SVZ
1.02369e-06	0.352739	0.74	0.667	0.000512867	DS_vs_WT	Pou3f3	7.38974e-06	TRUE	NSC_3	5.74426	7.61229	SVZ
1.08913e-07	0.350675	0.089	0.024	5.45656e-05	DS_vs_WT	Col1a1	8.67551e-07	TRUE	NSC_3	0.1299	0.4408	SVZ
0.00099693	0.346868	0.277	0.196	0.499462	DS_vs_WT	Foxj1	0.00390323	TRUE	NSC_3	1.54456	2.23616	SVZ
3.77281e-06	0.339915	0.168	0.084	0.00189018	DS_vs_WT	Fzd7	2.23467e-05	TRUE	NSC_3	0.329463	0.682678	SVZ
4.67789e-05	0.338217	0.114	0.052	0.0234362	DS_vs_WT	Thbs1	0.000216119	TRUE	NSC_3	0.302475	0.646581	SVZ
3.16286e-05	0.336717	0.656	0.559	0.0158459	DS_vs_WT	Gli3	0.000158831	TRUE	NSC_3	4.26428	5.64815	SVZ
1.35022e-06	0.33022	0.098	0.039	0.000676459	DS_vs_WT	Cspg4	8.91144e-06	TRUE	NSC_3	0.112156	0.398208	SVZ
2.11073e-05	0.312715	0.75	0.674	0.0105748	DS_vs_WT	Notch1	0.000110813	TRUE	NSC_3	6.22738	7.97672	SVZ
3.9487e-05	0.300933	0.784	0.7	0.019783	DS_vs_WT	Notch2	0.000194075	TRUE	NSC_3	7.22761	9.13592	SVZ
6.58279e-05	0.296299	0.128	0.063	0.0329798	DS_vs_WT	Alkbh5	0.000298162	TRUE	NSC_3	0.267302	0.556235	SVZ
0.00159375	0.292879	0.193	0.128	0.798469	DS_vs_WT	Irf3	0.005938	TRUE	NSC_3	0.532492	0.877429	SVZ
1.18669e-06	0.28864	0.861	0.833	0.00059453	DS_vs_WT	Lrp1	8.06248e-06	TRUE	NSC_3	9.80559	12.1989	SVZ
0.00196779	0.286219	0.393	0.308	0.985861	DS_vs_WT	Arx	0.00721522	TRUE	NSC_3	1.78842	2.40032	SVZ
0.00248362	0.27205	0.098	0.053	1	DS_vs_WT	Csf2ra	0.00843701	TRUE	NSC_3	0.228955	0.483991	SVZ
3.33623e-08	0.259011	0.987	0.96	1.67145e-05	DS_vs_WT	Ncan	2.85433e-07	TRUE	NSC_3	24.8199	29.8976	SVZ
0.0100969	0.258088	0.244	0.183	1	DS_vs_WT	Rcan1	0.0284437	TRUE	NSC_3	0.82401	1.18132	SVZ
0.0048984	0.25646	0.092	0.055	1	DS_vs_WT	Hes1	0.0155004	TRUE	NSC_3	0.213794	0.44993	SVZ
0.00233834	0.255781	0.138	0.084	1	DS_vs_WT	Tyk2	0.00820766	TRUE	NSC_3	0.313451	0.568237	SVZ
0.00279206	0.253961	0.463	0.378	1	DS_vs_WT	Pink1	0.0092138	TRUE	NSC_3	2.18723	2.8007	SVZ
0.00375394	0.242354	0.162	0.104	1	DS_vs_WT	Ikbkg	0.0122135	TRUE	NSC_3	0.444777	0.709058	SVZ
0.0516076	0.226776	0.157	0.12	1	DS_vs_WT	H2afx	0.113537	FALSE	NSC_3	0.543807	0.806588	SVZ
0.0206209	0.215425	0.098	0.066	1	DS_vs_WT	Rbfox3	0.0523453	FALSE	NSC_3	0.236751	0.435925	SVZ
0.00234505	0.209391	0.526	0.436	1	DS_vs_WT	Tle1	0.00820766	TRUE	NSC_3	2.90523	3.51523	SVZ
0.0342726	0.208512	0.07	0.042	1	DS_vs_WT	Cdkn1c	0.0807855	FALSE	NSC_3	0.174996	0.357703	SVZ
0.00739052	0.203371	0.312	0.24	1	DS_vs_WT	Vars	0.0224633	TRUE	NSC_3	1.18624	1.51721	SVZ
0.0753293	0.192494	0.434	0.381	1	DS_vs_WT	Mdk	0.148727	FALSE	NSC_3	2.32161	2.79572	SVZ
0.100482	0.192269	0.569	0.533	1	DS_vs_WT	Clu	0.184218	FALSE	NSC_3	4.92233	5.76661	SVZ
0.0406748	0.19189	0.068	0.041	1	DS_vs_WT	Ifnar2	0.0930285	FALSE	NSC_3	0.156941	0.321527	SVZ
0.00229493	0.185101	0.334	0.254	1	DS_vs_WT	Acads	0.00820766	TRUE	NSC_3	1.2361	1.54221	SVZ
0.0727469	0.181441	0.138	0.1	1	DS_vs_WT	Satb2	0.146126	FALSE	NSC_3	0.443144	0.636548	SVZ
0.105031	0.179666	0.338	0.291	1	DS_vs_WT	Ikbkb	0.189548	FALSE	NSC_3	1.4206	1.74162	SVZ
0.111565	0.178013	0.179	0.141	1	DS_vs_WT	Ldlr	0.19978	FALSE	NSC_3	0.618384	0.830917	SVZ
0.0264048	0.176698	0.084	0.05	1	DS_vs_WT	Col1a2	0.0648884	FALSE	NSC_3	0.237516	0.398756	SVZ
0.0168754	0.171137	0.16	0.11	1	DS_vs_WT	Optn	0.0438003	TRUE	NSC_3	0.451936	0.634801	SVZ
0.0235462	0.169288	0.193	0.141	1	DS_vs_WT	Kif7	0.0584857	FALSE	NSC_3	0.581479	0.778378	SVZ
0.136829	0.165864	0.323	0.304	1	DS_vs_WT	Aars	0.234129	FALSE	NSC_3	1.51814	1.82494	SVZ
0.00621309	0.163995	0.095	0.053	1	DS_vs_WT	Traf2	0.0193949	TRUE	NSC_3	0.215989	0.362376	SVZ
0.00783999	0.162792	0.106	0.064	1	DS_vs_WT	Gria1	0.0232184	TRUE	NSC_3	0.369952	0.533595	SVZ
0.150119	0.157511	0.334	0.326	1	DS_vs_WT	Dtx4	0.254982	FALSE	NSC_3	1.93368	2.27211	SVZ
0.0869223	0.14817	0.236	0.189	1	DS_vs_WT	Smurf1	0.165943	FALSE	NSC_3	0.829073	1.02691	SVZ
0.10016	0.142428	0.057	0.035	1	DS_vs_WT	Sod1	0.184218	FALSE	NSC_3	0.141431	0.259867	SVZ
0.0982229	0.136242	0.068	0.043	1	DS_vs_WT	Acot2	0.18298	FALSE	NSC_3	0.180725	0.297663	SVZ
0.0586156	0.130422	0.334	0.279	1	DS_vs_WT	Pld3	0.125372	FALSE	NSC_3	1.38683	1.61266	SVZ
0.259419	0.129893	0.113	0.088	1	DS_vs_WT	Hras	0.399505	FALSE	NSC_3	0.353213	0.480703	SVZ
0.409829	0.125157	0.339	0.316	1	DS_vs_WT	Traf3	0.531857	FALSE	NSC_3	1.68357	1.92677	SVZ
0.331093	0.124732	0.257	0.225	1	DS_vs_WT	Mavs	0.475885	FALSE	NSC_3	1.08328	1.27141	SVZ
0.286851	0.120374	0.051	0.036	1	DS_vs_WT	Rad9a	0.433089	FALSE	NSC_3	0.132474	0.231018	SVZ
0.229448	0.117033	0.469	0.425	1	DS_vs_WT	Pdgfrb	0.359557	FALSE	NSC_3	2.88267	3.21077	SVZ
0.0529388	0.117027	0.572	0.51	1	DS_vs_WT	Lmnb1	0.115367	FALSE	NSC_3	4.16997	4.60682	SVZ
0.401394	0.115824	0.193	0.167	1	DS_vs_WT	Prdx5	0.526829	FALSE	NSC_3	0.761199	0.908424	SVZ
0.169377	0.115226	0.261	0.264	1	DS_vs_WT	Axin2	0.277489	FALSE	NSC_3	1.29432	1.48508	SVZ
0.121709	0.113573	0.059	0.036	1	DS_vs_WT	Txnrd3	0.212991	FALSE	NSC_3	0.17	0.265829	SVZ
0.291876	0.111589	0.168	0.139	1	DS_vs_WT	Nrf1	0.437814	FALSE	NSC_3	0.611737	0.741349	SVZ
0.508052	0.110131	0.212	0.195	1	DS_vs_WT	Psmb2	0.627593	FALSE	NSC_3	0.964226	1.12004	SVZ
0.528329	0.10302	0.242	0.222	1	DS_vs_WT	Mecp2	0.63589	FALSE	NSC_3	1.05482	1.20692	SVZ
0.555904	0.101614	0.269	0.247	1	DS_vs_WT	Foxo1	0.665357	FALSE	NSC_3	1.37894	1.55254	SVZ
0.51208	0.100563	0.174	0.153	1	DS_vs_WT	Qars	0.629204	FALSE	NSC_3	0.698853	0.821496	SVZ
0.167968	0.0950812	0.054	0.034	1	DS_vs_WT	Cyba	0.277148	FALSE	NSC_3	0.154841	0.233515	SVZ
0.359446	0.0933515	0.152	0.154	1	DS_vs_WT	Ptch1	0.489767	FALSE	NSC_3	0.72341	0.838612	SVZ
0.00865148	0.0909095	0.163	0.116	1	DS_vs_WT	Vars2	0.0252974	FALSE	NSC_3	0.504801	0.602675	SVZ
0.346316	0.0901694	0.109	0.087	1	DS_vs_WT	Tapbp	0.487798	FALSE	NSC_3	0.352421	0.439646	SVZ
0.230366	0.0870361	0.059	0.04	1	DS_vs_WT	Cdkn1a	0.359557	FALSE	NSC_3	0.161236	0.233448	SVZ
0.506243	0.0815573	0.063	0.05	1	DS_vs_WT	Lhx2	0.627593	FALSE	NSC_3	0.235479	0.307334	SVZ
0.528532	0.0782433	0.063	0.059	1	DS_vs_WT	Mx1	0.63589	FALSE	NSC_3	0.233128	0.301852	SVZ
0.491691	0.0779025	0.057	0.044	1	DS_vs_WT	Fuca1	0.617286	FALSE	NSC_3	0.17649	0.241765	SVZ
0.452497	0.0740115	0.074	0.058	1	DS_vs_WT	Aldh4a1	0.571185	FALSE	NSC_3	0.259542	0.325843	SVZ
0.368919	0.0722556	0.052	0.047	1	DS_vs_WT	Ddit3	0.492603	FALSE	NSC_3	0.152437	0.211625	SVZ
0.184908	0.0720014	0.1	0.105	1	DS_vs_WT	Wnt7b	0.294577	FALSE	NSC_3	0.39947	0.471087	SVZ
0.580049	0.0701124	0.065	0.055	1	DS_vs_WT	Sirt3	0.683629	FALSE	NSC_3	0.203329	0.263253	SVZ
0.6033	0.0688812	0.136	0.119	1	DS_vs_WT	Rnf5	0.707423	FALSE	NSC_3	0.506505	0.580177	SVZ
0.0130132	0.0681292	0.16	0.118	1	DS_vs_WT	Cnp	0.0353654	FALSE	NSC_3	0.55749	0.632804	SVZ
0.340406	0.0607422	0.487	0.5	1	DS_vs_WT	Tle3	0.482417	FALSE	NSC_3	3.34676	3.53368	SVZ
0.730458	0.0573476	0.204	0.188	1	DS_vs_WT	Mki67	0.814819	FALSE	NSC_3	1.26437	1.35619	SVZ
0.728154	0.0541593	0.197	0.195	1	DS_vs_WT	Aqp4	0.814819	FALSE	NSC_3	1.0058	1.08253	SVZ
0.661884	0.0532483	0.06	0.05	1	DS_vs_WT	Rela	0.756907	FALSE	NSC_3	0.197308	0.242325	SVZ
0.707668	0.051195	0.666	0.646	1	DS_vs_WT	Nlgn2	0.797421	FALSE	NSC_3	5.12695	5.34828	SVZ
0.79171	0.0498602	0.544	0.528	1	DS_vs_WT	Sall1	0.870881	FALSE	NSC_3	3.56763	3.72825	SVZ
0.809074	0.0443107	0.084	0.075	1	DS_vs_WT	Clspn	0.880251	FALSE	NSC_3	0.355454	0.397731	SVZ
0.641335	0.0410299	0.124	0.109	1	DS_vs_WT	Gpx1	0.740742	FALSE	NSC_3	0.45055	0.492395	SVZ
0.0482622	0.0401884	0.094	0.067	1	DS_vs_WT	Cd68	0.108239	FALSE	NSC_3	0.313013	0.350103	SVZ
0.908609	0.0398692	0.257	0.249	1	DS_vs_WT	Bcl2l2	0.945444	FALSE	NSC_3	1.20628	1.2681	SVZ
0.81166	0.0397325	0.052	0.045	1	DS_vs_WT	Olig2	0.880251	FALSE	NSC_3	0.191202	0.224464	SVZ
0.865422	0.0390205	0.656	0.646	1	DS_vs_WT	Fbln2	0.921255	FALSE	NSC_3	5.41999	5.596	SVZ
0.796155	0.0372164	0.531	0.534	1	DS_vs_WT	Ctnnb1	0.87162	FALSE	NSC_3	4.80701	4.95876	SVZ
0.899414	0.035501	0.09	0.085	1	DS_vs_WT	Tnfrsf1a	0.944385	FALSE	NSC_3	0.319967	0.352851	SVZ
0.621823	0.0344637	0.057	0.058	1	DS_vs_WT	Axin1	0.72546	FALSE	NSC_3	0.19094	0.219733	SVZ
0.68997	0.0328169	0.122	0.109	1	DS_vs_WT	Mdm2	0.78129	FALSE	NSC_3	0.451168	0.484556	SVZ
0.933133	0.0286356	0.07	0.065	1	DS_vs_WT	Ifit2	0.958017	FALSE	NSC_3	0.314776	0.341134	SVZ
0.944095	0.0276987	0.117	0.112	1	DS_vs_WT	Sufu	0.964982	FALSE	NSC_3	0.457744	0.486002	SVZ
0.930266	0.0244913	0.236	0.228	1	DS_vs_WT	Ascl1	0.958017	FALSE	NSC_3	1.39238	1.43334	SVZ
0.830636	0.0170091	0.076	0.079	1	DS_vs_WT	Il18	0.89292	FALSE	NSC_3	0.342958	0.358885	SVZ
0.656076	0.0153731	0.136	0.124	1	DS_vs_WT	Fbln1	0.753997	FALSE	NSC_3	0.574266	0.59113	SVZ
0.963251	0.0127613	0.073	0.069	1	DS_vs_WT	Glb1	0.971664	FALSE	NSC_3	0.287683	0.299123	SVZ
0.921683	0.0118885	0.063	0.065	1	DS_vs_WT	Grin2b	0.954748	FALSE	NSC_3	0.316734	0.327629	SVZ
0.085687	0.0045776	0.062	0.044	1	DS_vs_WT	Cxcl5	0.164947	FALSE	NSC_3	0.220879	0.224759	SVZ
1	0	1	1	1	DS_vs_WT	Unnamed: 0	1	FALSE	NSC_3	1.05536e-177	1.19837e-178	SVZ
0.451153	-0.0012838	0.103	0.091	1	DS_vs_WT	Gsr	0.571185	FALSE	NSC_3	0.439635	0.438355	SVZ
0.848627	-0.00366147	0.067	0.072	1	DS_vs_WT	Trim25	0.907559	FALSE	NSC_3	0.287087	0.283825	SVZ
0.331677	-0.00616106	0.143	0.161	1	DS_vs_WT	Gstm1	0.475885	FALSE	NSC_3	0.682806	0.675635	SVZ
0.356732	-0.00634536	0.13	0.148	1	DS_vs_WT	Ifnar1	0.489767	FALSE	NSC_3	0.642135	0.634929	SVZ
0.949125	-0.00646838	0.265	0.261	1	DS_vs_WT	Mapt	0.96585	FALSE	NSC_3	1.36322	1.35265	SVZ
0.980295	-0.00738796	0.187	0.186	1	DS_vs_WT	Cpt1c	0.984557	FALSE	NSC_3	0.850524	0.841072	SVZ
0.498532	-0.00925786	0.198	0.183	1	DS_vs_WT	Psme1	0.622492	FALSE	NSC_3	0.867914	0.855965	SVZ
0.162262	-0.0112492	0.309	0.341	1	DS_vs_WT	Vegfa	0.273595	FALSE	NSC_3	1.9286	1.90585	SVZ
0.00272536	-0.0145541	0.049	0.077	1	DS_vs_WT	Braf	0.00912402	FALSE	NSC_3	0.26581	0.253105	SVZ
0.890545	-0.0177529	0.152	0.15	1	DS_vs_WT	Ythdf1	0.94107	FALSE	NSC_3	0.716747	0.695751	SVZ
0.405517	-0.0235315	0.206	0.228	1	DS_vs_WT	Mapk14	0.529234	FALSE	NSC_3	1.03122	0.998359	SVZ
0.32543	-0.0251899	0.051	0.065	1	DS_vs_WT	Dgat1	0.474516	FALSE	NSC_3	0.239211	0.217761	SVZ
0.687731	-0.0256003	0.138	0.151	1	DS_vs_WT	Atf6	0.78129	FALSE	NSC_3	0.738007	0.707439	SVZ
0.904492	-0.0261785	0.084	0.085	1	DS_vs_WT	Nfe2l2	0.94542	FALSE	NSC_3	0.383882	0.358997	SVZ
0.958868	-0.027035	0.192	0.197	1	DS_vs_WT	Aldh2	0.971485	FALSE	NSC_3	0.950824	0.914607	SVZ
0.0910752	-0.0271076	0.165	0.196	1	DS_vs_WT	Hsf1	0.172446	FALSE	NSC_3	0.763976	0.731141	SVZ
0.184582	-0.0279544	0.063	0.081	1	DS_vs_WT	Syn1	0.294577	FALSE	NSC_3	0.351284	0.325353	SVZ
0.831072	-0.0285087	0.182	0.194	1	DS_vs_WT	Nfkb1	0.89292	FALSE	NSC_3	0.98563	0.946778	SVZ
0.232208	-0.0286642	0.206	0.235	1	DS_vs_WT	Cux1	0.360001	FALSE	NSC_3	1.16116	1.11864	SVZ
0.634433	-0.0324555	0.067	0.078	1	DS_vs_WT	Irf2	0.736453	FALSE	NSC_3	0.315867	0.286595	SVZ
0.360434	-0.0335631	0.043	0.056	1	DS_vs_WT	Wtap	0.489767	FALSE	NSC_3	0.234305	0.205922	SVZ
0.892183	-0.0377658	0.436	0.447	1	DS_vs_WT	Wnt7a	0.94107	FALSE	NSC_3	2.76054	2.66337	SVZ
0.769885	-0.0397006	0.043	0.051	1	DS_vs_WT	Pdgfra	0.850925	FALSE	NSC_3	0.19238	0.160015	SVZ
0.0703505	-0.0407692	0.054	0.077	1	DS_vs_WT	Cr1l	0.142552	FALSE	NSC_3	0.275414	0.239877	SVZ
0.167329	-0.0435817	0.076	0.098	1	DS_vs_WT	Prkaa1	0.277148	FALSE	NSC_3	0.401163	0.359469	SVZ
0.114136	-0.0435929	0.048	0.068	1	DS_vs_WT	Eif2ak2	0.202811	FALSE	NSC_3	0.262567	0.224987	SVZ
0.16766	-0.0449928	0.54	0.508	1	DS_vs_WT	Tubb3	0.277148	FALSE	NSC_3	5.31167	5.11787	SVZ
0.367955	-0.0531345	0.078	0.096	1	DS_vs_WT	Fzd5	0.492603	FALSE	NSC_3	0.499506	0.445283	SVZ
0.182666	-0.0600981	0.052	0.074	1	DS_vs_WT	Rars	0.294577	FALSE	NSC_3	0.253452	0.20231	SVZ
0.0511069	-0.0619927	0.074	0.105	1	DS_vs_WT	Sox5	0.113516	FALSE	NSC_3	0.430038	0.369891	SVZ
0.436041	-0.0631548	0.043	0.057	1	DS_vs_WT	Slc17a6	0.556495	FALSE	NSC_3	0.230643	0.177933	SVZ
0.0234768	-0.0694193	0.087	0.122	1	DS_vs_WT	Ccna2	0.0584857	FALSE	NSC_3	0.594369	0.519468	SVZ
0.52409	-0.0711932	0.09	0.108	1	DS_vs_WT	Cflar	0.63589	FALSE	NSC_3	0.449526	0.379732	SVZ
0.560209	-0.07239	0.073	0.088	1	DS_vs_WT	Grip1	0.667053	FALSE	NSC_3	0.387077	0.319195	SVZ
0.73369	-0.0735293	0.101	0.113	1	DS_vs_WT	Rad50	0.814819	FALSE	NSC_3	0.605394	0.525622	SVZ
0.362871	-0.0750062	0.124	0.148	1	DS_vs_WT	Gad2	0.490194	FALSE	NSC_3	0.776739	0.686726	SVZ
0.389501	-0.0819756	0.311	0.344	1	DS_vs_WT	Gabbr1	0.514141	FALSE	NSC_3	2.05891	1.88995	SVZ
0.0397255	-0.0851856	0.125	0.165	1	DS_vs_WT	Slc7a2	0.0917659	FALSE	NSC_3	0.785037	0.682689	SVZ
0.219291	-0.0856628	0.22	0.257	1	DS_vs_WT	Sp1	0.34696	FALSE	NSC_3	1.37344	1.23662	SVZ
0.379017	-0.0867538	0.081	0.086	1	DS_vs_WT	Rfx5	0.503178	FALSE	NSC_3	0.394266	0.312895	SVZ
0.425145	-0.0890894	0.038	0.052	1	DS_vs_WT	Pex1	0.545603	FALSE	NSC_3	0.240689	0.166391	SVZ
0.353887	-0.0895533	0.04	0.055	1	DS_vs_WT	Hus1	0.489767	FALSE	NSC_3	0.227239	0.153376	SVZ
0.525808	-0.0935811	0.174	0.197	1	DS_vs_WT	Sorl1	0.63589	FALSE	NSC_3	1.04404	0.915662	SVZ
0.575703	-0.0976533	0.125	0.14	1	DS_vs_WT	Gba	0.681987	FALSE	NSC_3	0.63506	0.528048	SVZ
0.0980552	-0.0998964	0.076	0.107	1	DS_vs_WT	Nos1	0.18298	FALSE	NSC_3	0.451648	0.354533	SVZ
0.310917	-0.103109	0.041	0.058	1	DS_vs_WT	Nbn	0.463367	FALSE	NSC_3	0.278784	0.190579	SVZ
0.412359	-0.106583	0.044	0.057	1	DS_vs_WT	Ccnd1	0.532151	FALSE	NSC_3	0.256203	0.166742	SVZ
0.275384	-0.107932	0.214	0.249	1	DS_vs_WT	Psen1	0.418512	FALSE	NSC_3	1.26233	1.09925	SVZ
0.349362	-0.110414	0.174	0.204	1	DS_vs_WT	Npc1	0.489106	FALSE	NSC_3	0.941389	0.798352	SVZ
0.0607606	-0.111698	0.057	0.061	1	DS_vs_WT	Neurod1	0.128768	FALSE	NSC_3	0.274964	0.179977	SVZ
0.35978	-0.111965	0.493	0.519	1	DS_vs_WT	Mtor	0.489767	FALSE	NSC_3	3.33128	3.00785	SVZ
0.120568	-0.114331	0.03	0.051	1	DS_vs_WT	Casp7	0.212605	FALSE	NSC_3	0.202214	0.110618	SVZ
0.326615	-0.115808	0.135	0.162	1	DS_vs_WT	Dlg4	0.474516	FALSE	NSC_3	0.695316	0.564548	SVZ
0.321318	-0.120692	0.078	0.096	1	DS_vs_WT	Sirt5	0.474516	FALSE	NSC_3	0.403112	0.290507	SVZ
0.076992	-0.120707	0.046	0.074	1	DS_vs_WT	Casp3	0.149455	FALSE	NSC_3	0.289259	0.185779	SVZ
0.0104	-0.122225	0.087	0.132	1	DS_vs_WT	Mettl3	0.0289445	TRUE	NSC_3	0.519229	0.395821	SVZ
0.129073	-0.124434	0.168	0.208	1	DS_vs_WT	Aldh9a1	0.222507	FALSE	NSC_3	1.00881	0.842813	SVZ
0.273713	-0.124957	0.466	0.482	1	DS_vs_WT	Ep300	0.418512	FALSE	NSC_3	3.2301	2.87913	SVZ
0.338608	-0.13202	0.36	0.384	1	DS_vs_WT	Gsk3b	0.482417	FALSE	NSC_3	2.19026	1.91128	SVZ
0.0699541	-0.133525	0.071	0.105	1	DS_vs_WT	Egfr	0.142552	FALSE	NSC_3	0.477162	0.346583	SVZ
0.0338281	-0.135807	0.071	0.109	1	DS_vs_WT	Tbk1	0.0805597	FALSE	NSC_3	0.428334	0.300013	SVZ
0.105023	-0.14007	0.108	0.144	1	DS_vs_WT	Wars	0.189548	FALSE	NSC_3	0.62499	0.474638	SVZ
0.179697	-0.143978	0.507	0.544	1	DS_vs_WT	Eif4g1	0.292324	FALSE	NSC_3	3.83139	3.3725	SVZ
0.323649	-0.146761	0.094	0.116	1	DS_vs_WT	Cnr1	0.474516	FALSE	NSC_3	0.624813	0.467655	SVZ
0.00882402	-0.149686	0.043	0.08	1	DS_vs_WT	Smurf2	0.0254794	TRUE	NSC_3	0.323685	0.193232	SVZ
0.0652671	-0.149993	0.127	0.17	1	DS_vs_WT	Crebbp	0.135826	FALSE	NSC_3	0.738559	0.566885	SVZ
4.18823e-05	-0.152385	0.079	0.142	0.020983	DS_vs_WT	Tle4	0.000201501	TRUE	NSC_3	0.635387	0.471459	SVZ
0.0150165	-0.152691	0.052	0.09	1	DS_vs_WT	Sod2	0.0394184	TRUE	NSC_3	0.378282	0.239863	SVZ
0.0618389	-0.157232	0.068	0.077	1	DS_vs_WT	Atrip	0.129862	FALSE	NSC_3	0.370404	0.228902	SVZ
[truncated: 1,654 more rows]

## Sheet: P0_Cortex_Cellsubtype
p_val	avg_log2FC	pct.1	pct.2	p_val_adj	comparison	gene	FDR	sig	celltype	exp.1	exp.2	Region
1.66429e-37	0.817842	0.277	0.109	8.33811e-35	DS_vs_WT	Col1a1	7.92204e-36	TRUE	Astrocyte_1	0.427898	1.51705	Cortex
2.65987e-42	0.622276	0.851	0.795	1.33259e-39	DS_vs_WT	App	1.58262e-40	TRUE	Astrocyte_1	9.09832	14.5444	Cortex
1.26062e-19	0.537704	0.457	0.353	6.3157e-17	DS_vs_WT	Dvl1	3.33364e-18	TRUE	Astrocyte_1	1.36013	2.4261	Cortex
3.76533e-16	0.464497	0.563	0.436	1.88643e-13	DS_vs_WT	Dkk3	6.89345e-15	TRUE	Astrocyte_1	2.44748	3.75696	Cortex
2.95409e-11	0.457581	0.271	0.178	1.48e-08	DS_vs_WT	Olig2	3.05684e-10	TRUE	Astrocyte_1	0.817868	1.49637	Cortex
9.54736e-13	0.431251	0.486	0.445	4.78323e-10	DS_vs_WT	Vegfa	1.13614e-11	TRUE	Astrocyte_1	2.30121	3.45136	Cortex
3.99548e-10	0.416709	0.226	0.153	2.00173e-07	DS_vs_WT	Mdga1	3.39616e-09	TRUE	Astrocyte_1	0.525655	1.03657	Cortex
7.72542e-15	0.398316	0.821	0.807	3.87044e-12	DS_vs_WT	Tnc	1.08156e-13	TRUE	Astrocyte_1	13.8681	18.5957	Cortex
1.1688e-06	0.376514	0.497	0.444	0.000585569	DS_vs_WT	Satb2	5.24858e-06	TRUE	Astrocyte_1	3.57735	4.94232	Cortex
1.42569e-12	0.375477	0.732	0.652	7.14271e-10	DS_vs_WT	Igfbp2	1.61578e-11	TRUE	Astrocyte_1	5.73263	7.73402	Cortex
1.93686e-16	0.374617	0.768	0.738	9.70367e-14	DS_vs_WT	Bcan	3.84144e-15	TRUE	Astrocyte_1	6.43479	8.63917	Cortex
8.50102e-09	0.345368	0.748	0.684	4.25901e-06	DS_vs_WT	Tubb3	5.46822e-08	TRUE	Astrocyte_1	8.51663	11.0906	Cortex
2.74801e-07	0.330253	0.449	0.371	0.000137675	DS_vs_WT	Fbln2	1.36255e-06	TRUE	Astrocyte_1	1.89299	2.63717	Cortex
2.39591e-08	0.298537	0.213	0.138	1.20035e-05	DS_vs_WT	Cdkn1c	1.3908e-07	TRUE	Astrocyte_1	0.473033	0.811677	Cortex
8.66028e-08	0.247514	0.131	0.073	4.3388e-05	DS_vs_WT	Cspg4	4.48075e-07	TRUE	Astrocyte_1	0.222533	0.451342	Cortex
2.24529e-06	0.231183	0.772	0.755	0.00112489	DS_vs_WT	Lrp1	9.71597e-06	TRUE	Astrocyte_1	6.90134	8.27458	Cortex
4.28537e-09	0.230533	0.561	0.573	2.14697e-06	DS_vs_WT	Pou3f3	3.09066e-08	TRUE	Astrocyte_1	3.28076	4.02248	Cortex
1.94299e-05	0.221666	0.245	0.18	0.00973436	DS_vs_WT	Ldlr	7.34017e-05	TRUE	Astrocyte_1	0.663087	0.939292	Cortex
6.82534e-05	0.212083	0.127	0.083	0.0341949	DS_vs_WT	Fzd8	0.000242452	TRUE	Astrocyte_1	0.261692	0.461493	Cortex
6.96436e-05	0.204598	0.078	0.044	0.0348915	DS_vs_WT	Cldn5	0.000243753	TRUE	Astrocyte_1	0.147162	0.321949	Cortex
0.00126435	0.201312	0.093	0.065	0.633439	DS_vs_WT	Tyk2	0.00297936	TRUE	Astrocyte_1	0.191761	0.370219	Cortex
0.00451439	0.200647	0.31	0.266	1	DS_vs_WT	Vars	0.00918312	TRUE	Astrocyte_1	1.07819	1.38829	Cortex
0.00355972	0.196595	0.246	0.204	1	DS_vs_WT	Rcan1	0.00756441	TRUE	Astrocyte_1	0.71709	0.967769	Cortex
0.00227016	0.1908	0.309	0.258	1	DS_vs_WT	Lrp5	0.0051457	TRUE	Astrocyte_1	0.982636	1.26297	Cortex
0.000492347	0.18359	0.599	0.578	0.246666	DS_vs_WT	Nlgn2	0.00133157	TRUE	Astrocyte_1	3.35366	3.94448	Cortex
0.0069077	0.182027	0.365	0.319	1	DS_vs_WT	Notch3	0.0133661	TRUE	Astrocyte_1	1.37334	1.6925	Cortex
0.0044142	0.178123	0.316	0.304	1	DS_vs_WT	Pld3	0.00905673	TRUE	Astrocyte_1	1.17846	1.46473	Cortex
9.11257e-05	0.172512	0.976	0.969	0.045654	DS_vs_WT	Ncan	0.000289172	TRUE	Astrocyte_1	36.0404	40.7453	Cortex
0.00118882	0.170751	0.127	0.089	0.595601	DS_vs_WT	Ikbkg	0.00285798	TRUE	Astrocyte_1	0.276986	0.437432	Cortex
0.000377477	0.161086	0.06	0.041	0.189116	DS_vs_WT	Cxcl5	0.00104464	TRUE	Astrocyte_1	0.10742	0.238239	Cortex
0.0176747	0.158386	0.122	0.103	1	DS_vs_WT	Qars	0.0302632	TRUE	Astrocyte_1	0.314991	0.46758	Cortex
4.70288e-05	0.157266	0.066	0.034	0.0235614	DS_vs_WT	Gria4	0.000169589	TRUE	Astrocyte_1	0.0975749	0.223985	Cortex
2.15871e-07	0.154088	0.08	0.036	0.000108151	DS_vs_WT	Col1a2	1.09313e-06	TRUE	Astrocyte_1	0.132104	0.259712	Cortex
0.00109069	0.152849	0.095	0.062	0.546434	DS_vs_WT	Gsto1	0.00267612	TRUE	Astrocyte_1	0.193896	0.327329	Cortex
0.0280328	0.151809	0.196	0.173	1	DS_vs_WT	Acads	0.0433234	TRUE	Astrocyte_1	0.56239	0.735755	Cortex
0.000180838	0.150017	0.062	0.034	0.0906001	DS_vs_WT	Psmb5	0.0005264	TRUE	Astrocyte_1	0.0970467	0.217264	Cortex
0.0104322	0.145035	0.774	0.755	1	DS_vs_WT	Mapt	0.0192471	TRUE	Astrocyte_1	8.67426	9.69738	Cortex
0.0491707	0.143128	0.388	0.368	1	DS_vs_WT	Aars	0.0708002	FALSE	Astrocyte_1	1.55435	1.82076	Cortex
0.0259572	0.138238	0.126	0.108	1	DS_vs_WT	Vars2	0.0409126	TRUE	Astrocyte_1	0.32647	0.459859	Cortex
0.0263218	0.138078	0.248	0.24	1	DS_vs_WT	Rbfox3	0.0412144	TRUE	Astrocyte_1	0.904595	1.09589	Cortex
0.0628616	0.135097	0.195	0.166	1	DS_vs_WT	Arx	0.0880062	FALSE	Astrocyte_1	0.63654	0.797193	Cortex
0.01439	0.133463	0.107	0.086	1	DS_vs_WT	Cx3cl1	0.0251825	TRUE	Astrocyte_1	0.245092	0.365771	Cortex
0.0286588	0.133295	0.524	0.512	1	DS_vs_WT	Mtor	0.0437438	TRUE	Astrocyte_1	2.75098	3.11406	Cortex
0.025952	0.132493	0.126	0.101	1	DS_vs_WT	Ifnar1	0.0409126	TRUE	Astrocyte_1	0.303975	0.429399	Cortex
0.000615185	0.120621	0.263	0.209	0.308208	DS_vs_WT	Gria1	0.00162682	TRUE	Astrocyte_1	1.06692	1.24716	Cortex
0.000782753	0.119905	0.053	0.028	0.392159	DS_vs_WT	Abcc9	0.0020472	TRUE	Astrocyte_1	0.101623	0.197094	Cortex
0.0493817	0.117833	0.086	0.073	1	DS_vs_WT	Gli1	0.0708002	FALSE	Astrocyte_1	0.234835	0.339925	Cortex
0.02307	0.115054	0.131	0.102	1	DS_vs_WT	Irf3	0.037099	TRUE	Astrocyte_1	0.2751	0.380954	Cortex
0.00924375	0.107902	0.058	0.038	1	DS_vs_WT	Ifnar2	0.0173229	TRUE	Astrocyte_1	0.0990004	0.184348	Cortex
0.0286724	0.107359	0.1	0.075	1	DS_vs_WT	Tapbp	0.0437438	TRUE	Astrocyte_1	0.228482	0.323388	Cortex
0.128125	0.105128	0.134	0.114	1	DS_vs_WT	Kif7	0.164831	FALSE	Astrocyte_1	0.356841	0.459404	Cortex
0.175912	0.104657	0.207	0.203	1	DS_vs_WT	Tle1	0.21581	FALSE	Astrocyte_1	0.735147	0.865697	Cortex
0.00118097	0.10437	0.4	0.418	0.591664	DS_vs_WT	Gabbr1	0.00285798	TRUE	Astrocyte_1	2.113	2.34655	Cortex
0.0382451	0.104045	0.077	0.061	1	DS_vs_WT	Csf2ra	0.0572473	FALSE	Astrocyte_1	0.154991	0.241364	Cortex
0.475226	0.102816	0.133	0.12	1	DS_vs_WT	Sst	0.521215	FALSE	Astrocyte_1	0.728998	0.856715	Cortex
0.0761705	0.101358	0.135	0.136	1	DS_vs_WT	Slc17a7	0.103474	FALSE	Astrocyte_1	0.507198	0.616896	Cortex
0.0382077	0.0997535	0.191	0.193	1	DS_vs_WT	Dyrk1a	0.0572473	FALSE	Astrocyte_1	0.658759	0.77751	Cortex
0.110716	0.0963431	0.119	0.098	1	DS_vs_WT	Grip1	0.144782	FALSE	Astrocyte_1	0.305926	0.396114	Cortex
0.0195008	0.0939637	0.055	0.037	1	DS_vs_WT	Ggt7	0.0329162	FALSE	Astrocyte_1	0.08999	0.163345	Cortex
0.23612	0.0937856	0.17	0.158	1	DS_vs_WT	Myc	0.282395	FALSE	Astrocyte_1	0.549399	0.653467	Cortex
0.285954	0.0907585	0.169	0.158	1	DS_vs_WT	Prdx5	0.331985	FALSE	Astrocyte_1	0.557054	0.658153	Cortex
0.141499	0.090494	0.155	0.151	1	DS_vs_WT	Hsf1	0.179131	FALSE	Astrocyte_1	0.478973	0.574714	Cortex
0.37442	0.0888619	0.109	0.098	1	DS_vs_WT	H2afx	0.419388	FALSE	Astrocyte_1	0.391804	0.480226	Cortex
0.112544	0.0839582	0.072	0.063	1	DS_vs_WT	Mdm2	0.146369	FALSE	Astrocyte_1	0.170584	0.240728	Cortex
0.294247	0.0829048	0.258	0.249	1	DS_vs_WT	Ikbkb	0.336687	FALSE	Astrocyte_1	0.857938	0.967832	Cortex
0.013053	0.0821973	0.088	0.062	1	DS_vs_WT	Grin1	0.023012	FALSE	Astrocyte_1	0.198783	0.269067	Cortex
0.187677	0.0769559	0.096	0.078	1	DS_vs_WT	Fzd7	0.229062	FALSE	Astrocyte_1	0.247682	0.316042	Cortex
0.122653	0.073555	0.054	0.047	1	DS_vs_WT	Cd68	0.15865	FALSE	Astrocyte_1	0.116166	0.174549	Cortex
0.330472	0.0724653	0.097	0.095	1	DS_vs_WT	Lef1	0.37276	FALSE	Astrocyte_1	0.357172	0.427082	Cortex
0.19672	0.0709491	0.053	0.049	1	DS_vs_WT	Sirt3	0.237661	FALSE	Astrocyte_1	0.12589	0.182643	Cortex
0.0482723	0.0689209	0.066	0.066	1	DS_vs_WT	Fuca1	0.0700538	FALSE	Astrocyte_1	0.155669	0.212218	Cortex
0.0462857	0.0678716	0.093	0.099	1	DS_vs_WT	Atrip	0.0675828	FALSE	Astrocyte_1	0.290334	0.352489	Cortex
0.256621	0.0659496	0.051	0.043	1	DS_vs_WT	Slc17a6	0.305379	FALSE	Astrocyte_1	0.123798	0.176362	Cortex
0.421204	0.0651523	0.135	0.121	1	DS_vs_WT	Optn	0.466264	FALSE	Astrocyte_1	0.377372	0.441	Cortex
0.83654	0.0558698	0.124	0.123	1	DS_vs_WT	Nr4a2	0.85084	FALSE	Astrocyte_1	0.75471	0.823996	Cortex
0.267549	0.0555596	0.152	0.155	1	DS_vs_WT	Wnt7b	0.316799	FALSE	Astrocyte_1	0.549836	0.610686	Cortex
0.284062	0.0546825	0.053	0.042	1	DS_vs_WT	Psmb10	0.331405	FALSE	Astrocyte_1	0.115641	0.158739	Cortex
0.19078	0.0543823	0.187	0.164	1	DS_vs_WT	Fbln1	0.231662	FALSE	Astrocyte_1	0.708276	0.773898	Cortex
0.300887	0.0536926	0.055	0.043	1	DS_vs_WT	Pecam1	0.342637	FALSE	Astrocyte_1	0.134363	0.177375	Cortex
0.133092	0.0533161	0.105	0.109	1	DS_vs_WT	Nos1	0.170301	FALSE	Astrocyte_1	0.348422	0.399186	Cortex
0.0225006	0.05187	0.074	0.052	1	DS_vs_WT	Alkbh5	0.0364295	FALSE	Astrocyte_1	0.141487	0.183274	Cortex
0.484594	0.0506093	0.088	0.077	1	DS_vs_WT	Cdkn1a	0.526636	FALSE	Astrocyte_1	0.247883	0.292436	Cortex
0.666328	0.0455451	0.087	0.08	1	DS_vs_WT	Trp53	0.698617	FALSE	Astrocyte_1	0.257463	0.297793	Cortex
0.596904	0.0411989	0.778	0.765	1	DS_vs_WT	Aldh1l1	0.634211	FALSE	Astrocyte_1	8.62775	8.90666	Cortex
0.499854	0.0408624	0.379	0.359	1	DS_vs_WT	Traf3	0.540751	FALSE	Astrocyte_1	1.63946	1.71529	Cortex
0.763089	0.0400757	0.158	0.153	1	DS_vs_WT	Hras	0.786213	FALSE	Astrocyte_1	0.507371	0.54983	Cortex
0.550508	0.0393046	0.114	0.115	1	DS_vs_WT	Gad1	0.588831	FALSE	Astrocyte_1	0.424409	0.463749	Cortex
0.0447275	0.0387019	0.046	0.053	1	DS_vs_WT	Gstk1	0.0661189	FALSE	Astrocyte_1	0.141076	0.172101	Cortex
0.270446	0.0316397	0.13	0.139	1	DS_vs_WT	Foxo1	0.318644	FALSE	Astrocyte_1	0.492324	0.525414	Cortex
0.0122133	0.0292942	0.058	0.071	1	DS_vs_WT	Rars	0.0218553	FALSE	Astrocyte_1	0.203381	0.228066	Cortex
0.0450432	0.0291068	0.1	0.114	1	DS_vs_WT	Gpx1	0.0661746	FALSE	Astrocyte_1	0.346658	0.374103	Cortex
0.653473	0.0289783	0.128	0.117	1	DS_vs_WT	Lhx6	0.68817	FALSE	Astrocyte_1	0.503962	0.534476	Cortex
0.384965	0.0195556	0.07	0.076	1	DS_vs_WT	Tnfrsf1a	0.428139	FALSE	Astrocyte_1	0.222328	0.23901	Cortex
0.3186	0.0139792	0.232	0.246	1	DS_vs_WT	Pink1	0.36108	FALSE	Astrocyte_1	0.902956	0.921484	Cortex
0.0204641	0.00973706	0.053	0.069	1	DS_vs_WT	Cflar	0.0340591	FALSE	Astrocyte_1	0.232636	0.240983	Cortex
0.55172	0.00883419	0.074	0.08	1	DS_vs_WT	Cxcl13	0.588831	FALSE	Astrocyte_1	0.212702	0.220151	Cortex
0.956262	0.00862817	0.23	0.231	1	DS_vs_WT	Smurf1	0.960297	FALSE	Astrocyte_1	0.850065	0.861162	Cortex
0.793425	0.00761567	0.073	0.076	1	DS_vs_WT	Mx1	0.810524	FALSE	Astrocyte_1	0.211361	0.217773	Cortex
0.0757531	0.0034678	0.094	0.111	1	DS_vs_WT	Pdgfrb	0.103474	FALSE	Astrocyte_1	0.396942	0.400304	Cortex
0.00104988	0.00201671	0.125	0.155	0.525992	DS_vs_WT	Psme1	0.00263542	FALSE	Astrocyte_1	0.50509	0.507195	Cortex
1	0	1	1	1	DS_vs_WT	Unnamed: 0	1	FALSE	Astrocyte_1	1.14883e-177	1.20598e-178	Cortex
0.0107972	-0.00322632	0.054	0.07	1	DS_vs_WT	Rgs8	0.0197672	FALSE	Astrocyte_1	0.218293	0.215572	Cortex
0.86607	-0.00441261	0.179	0.185	1	DS_vs_WT	Clu	0.877126	FALSE	Astrocyte_1	0.720106	0.714853	Cortex
0.106597	-0.0108205	0.076	0.092	1	DS_vs_WT	Ascl1	0.141732	FALSE	Astrocyte_1	0.385751	0.375397	Cortex
0.932322	-0.0120014	0.065	0.068	1	DS_vs_WT	S100a10	0.940223	FALSE	Astrocyte_1	0.203553	0.193583	Cortex
0.148854	-0.012534	0.091	0.107	1	DS_vs_WT	Npy	0.185483	FALSE	Astrocyte_1	0.424986	0.412659	Cortex
7.18286e-06	-0.0126418	0.096	0.135	0.00359861	DS_vs_WT	Gstm1	2.8492e-05	FALSE	Astrocyte_1	0.460697	0.447953	Cortex
0.145117	-0.0178441	0.285	0.31	1	DS_vs_WT	Otx1	0.182314	FALSE	Astrocyte_1	1.28564	1.25754	Cortex
0.145545	-0.0179447	0.254	0.279	1	DS_vs_WT	Gli2	0.182314	FALSE	Astrocyte_1	1.06436	1.03884	Cortex
0.000874894	-0.0187037	0.182	0.222	0.438322	DS_vs_WT	Grin2b	0.00226331	FALSE	Astrocyte_1	0.870427	0.846334	Cortex
0.00106303	-0.0189178	0.066	0.093	0.532577	DS_vs_WT	Gusb	0.00263542	FALSE	Astrocyte_1	0.275335	0.258721	Cortex
0.000324599	-0.0196779	0.064	0.092	0.162624	DS_vs_WT	Tbk1	0.000908878	FALSE	Astrocyte_1	0.265867	0.248718	Cortex
0.626076	-0.0219331	0.437	0.427	1	DS_vs_WT	Lmnb1	0.662249	FALSE	Astrocyte_1	2.57713	2.52316	Cortex
0.73611	-0.0241299	0.541	0.554	1	DS_vs_WT	Notch1	0.765041	FALSE	Astrocyte_1	3.3592	3.2869	Cortex
0.000139717	-0.0250469	0.029	0.052	0.0699981	DS_vs_WT	Galc	0.000420919	FALSE	Astrocyte_1	0.138379	0.118786	Cortex
0.793496	-0.0250795	0.078	0.078	1	DS_vs_WT	Plk3	0.810524	FALSE	Astrocyte_1	0.263112	0.241344	Cortex
0.0167511	-0.0257693	0.218	0.251	1	DS_vs_WT	Syn1	0.0288896	FALSE	Astrocyte_1	0.945618	0.911175	Cortex
0.000893863	-0.025941	0.049	0.074	0.447825	DS_vs_WT	Traf2	0.00228752	FALSE	Astrocyte_1	0.209598	0.188042	Cortex
0.00106184	-0.028736	0.039	0.062	0.531984	DS_vs_WT	Gsr	0.00263542	FALSE	Astrocyte_1	0.163358	0.140415	Cortex
0.076519	-0.0335548	0.374	0.408	1	DS_vs_WT	Dtx4	0.103474	FALSE	Astrocyte_1	2.06914	1.99858	Cortex
0.684137	-0.0374257	0.054	0.056	1	DS_vs_WT	Foxj1	0.714143	FALSE	Astrocyte_1	0.199074	0.168369	Cortex
0.757073	-0.03947	0.078	0.083	1	DS_vs_WT	Sufu	0.783406	FALSE	Astrocyte_1	0.284492	0.249827	Cortex
0.375335	-0.0397468	0.094	0.108	1	DS_vs_WT	Smpd1	0.419388	FALSE	Astrocyte_1	0.325447	0.289429	Cortex
0.291023	-0.0406243	0.248	0.27	1	DS_vs_WT	Notch2	0.334607	FALSE	Astrocyte_1	1.24966	1.1872	Cortex
0.021968	-0.0421262	0.076	0.1	1	DS_vs_WT	Atf6	0.0358108	FALSE	Astrocyte_1	0.31585	0.277983	Cortex
0.43914	-0.0426441	0.046	0.05	1	DS_vs_WT	Ddit3	0.483867	FALSE	Astrocyte_1	0.145633	0.112265	Cortex
0.00414571	-0.043277	0.046	0.07	1	DS_vs_WT	Rfx5	0.00857981	FALSE	Astrocyte_1	0.225225	0.189018	Cortex
0.0661279	-0.044227	0.254	0.287	1	DS_vs_WT	Tle3	0.0915026	FALSE	Astrocyte_1	1.10633	1.04274	Cortex
0.523959	-0.0467312	0.164	0.179	1	DS_vs_WT	Cux1	0.564263	FALSE	Astrocyte_1	0.698359	0.644228	Cortex
0.109104	-0.0479142	0.101	0.123	1	DS_vs_WT	Gba	0.143463	FALSE	Astrocyte_1	0.402134	0.356332	Cortex
0.151678	-0.0488838	0.097	0.117	1	DS_vs_WT	Rnf5	0.188017	FALSE	Astrocyte_1	0.368358	0.32277	Cortex
0.161985	-0.050024	0.041	0.055	1	DS_vs_WT	Trim25	0.199754	FALSE	Astrocyte_1	0.180373	0.140146	Cortex
0.00283614	-0.0510499	0.032	0.054	1	DS_vs_WT	Pex1	0.00625	FALSE	Astrocyte_1	0.169933	0.129259	Cortex
0.00214667	-0.0567505	0.049	0.076	1	DS_vs_WT	Sirt1	0.00491257	FALSE	Astrocyte_1	0.23963	0.191814	Cortex
0.000510443	-0.057298	0.029	0.054	0.255732	DS_vs_WT	Kras	0.00136501	FALSE	Astrocyte_1	0.135895	0.0916662	Cortex
0.134349	-0.059305	0.168	0.194	1	DS_vs_WT	Nfkb1	0.17099	FALSE	Astrocyte_1	0.681476	0.613757	Cortex
0.277677	-0.0593431	0.103	0.121	1	DS_vs_WT	Nrf1	0.325553	FALSE	Astrocyte_1	0.425185	0.367752	Cortex
0.290337	-0.0622255	0.044	0.053	1	DS_vs_WT	Aldh4a1	0.334607	FALSE	Astrocyte_1	0.179154	0.129376	Cortex
9.94931e-06	-0.0650309	0.046	0.082	0.0049846	DS_vs_WT	Cr1l	3.81925e-05	FALSE	Astrocyte_1	0.242086	0.187341	Cortex
8.04913e-05	-0.0686463	0.125	0.172	0.0403261	DS_vs_WT	Hif1a	0.000266068	FALSE	Astrocyte_1	0.588238	0.514436	Cortex
0.00016544	-0.0687158	0.024	0.05	0.0828852	DS_vs_WT	Casp7	0.000492183	FALSE	Astrocyte_1	0.138564	0.0856056	Cortex
0.482868	-0.0691861	0.098	0.106	1	DS_vs_WT	Cnp	0.526636	FALSE	Astrocyte_1	0.419819	0.353337	Cortex
0.0181469	-0.0695318	0.048	0.07	1	DS_vs_WT	Clspn	0.0308497	FALSE	Astrocyte_1	0.283925	0.223513	Cortex
0.198478	-0.0695483	0.045	0.058	1	DS_vs_WT	Dgat1	0.238574	FALSE	Astrocyte_1	0.202466	0.145874	Cortex
0.100907	-0.07072	0.043	0.059	1	DS_vs_WT	Irf2	0.134921	FALSE	Astrocyte_1	0.176351	0.120078	Cortex
0.0296351	-0.0723342	0.052	0.075	1	DS_vs_WT	Sod2	0.0449245	FALSE	Astrocyte_1	0.225338	0.165416	Cortex
0.00580769	-0.0740561	0.045	0.07	1	DS_vs_WT	Traf6	0.0114234	FALSE	Astrocyte_1	0.200567	0.140495	Cortex
0.00615339	-0.0746708	0.114	0.148	1	DS_vs_WT	Psmb2	0.0120042	FALSE	Astrocyte_1	0.545954	0.467974	Cortex
0.0641351	-0.0760802	0.23	0.265	1	DS_vs_WT	Bcl2l2	0.0892641	FALSE	Astrocyte_1	0.962948	0.862115	Cortex
0.0543499	-0.0761457	0.098	0.124	1	DS_vs_WT	Aldh2	0.0769956	FALSE	Astrocyte_1	0.414428	0.34171	Cortex
0.0814732	-0.0783597	0.041	0.056	1	DS_vs_WT	Axin1	0.109552	FALSE	Astrocyte_1	0.163709	0.102188	Cortex
0.00201371	-0.080561	0.039	0.066	1	DS_vs_WT	Gabra1	0.00465303	FALSE	Astrocyte_1	0.194938	0.13004	Cortex
0.00481821	-0.0832202	0.325	0.377	1	DS_vs_WT	Axin2	0.00971809	FALSE	Astrocyte_1	1.83957	1.6804	Cortex
0.0161812	-0.0834746	0.178	0.216	1	DS_vs_WT	Psen1	0.0281104	FALSE	Astrocyte_1	0.770754	0.671206	Cortex
6.53416e-06	-0.0844581	0.091	0.139	0.00327362	DS_vs_WT	Otud4	2.63581e-05	FALSE	Astrocyte_1	0.43306	0.351574	Cortex
0.00187108	-0.0845008	0.038	0.064	0.937413	DS_vs_WT	Lifr	0.00436586	FALSE	Astrocyte_1	0.21058	0.141711	Cortex
0.107538	-0.0850556	0.132	0.158	1	DS_vs_WT	Sp1	0.142189	FALSE	Astrocyte_1	0.541394	0.453147	Cortex
0.00302826	-0.0865805	0.041	0.068	1	DS_vs_WT	Braf	0.00655205	FALSE	Astrocyte_1	0.190258	0.120928	Cortex
0.0673678	-0.0890826	0.209	0.242	1	DS_vs_WT	Cnr1	0.0926795	FALSE	Astrocyte_1	1.14234	1.01406	Cortex
0.00906156	-0.0918255	0.469	0.522	1	DS_vs_WT	Eif4g1	0.0171163	FALSE	Astrocyte_1	2.92179	2.67995	Cortex
0.000120559	-0.0939789	0.034	0.065	0.0604001	DS_vs_WT	Il18	0.00037754	FALSE	Astrocyte_1	0.184337	0.109647	Cortex
0.00371951	-0.0945415	0.034	0.058	1	DS_vs_WT	Npc2	0.0077653	FALSE	Astrocyte_1	0.165687	0.0917471	Cortex
0.0087707	-0.0966375	0.282	0.329	1	DS_vs_WT	Txnrd1	0.0168341	FALSE	Astrocyte_1	1.48409	1.32315	Cortex
0.0110818	-0.0983605	0.085	0.116	1	DS_vs_WT	Prdx6	0.0201334	FALSE	Astrocyte_1	0.427266	0.3332	Cortex
0.0526006	-0.102461	0.178	0.212	1	DS_vs_WT	Mdk	0.0749637	FALSE	Astrocyte_1	0.81259	0.688324	Cortex
3.77156e-06	-0.103307	0.019	0.051	0.00188955	DS_vs_WT	Trp53bp1	1.54764e-05	TRUE	Astrocyte_1	0.138632	0.0599486	Cortex
0.0547886	-0.106748	0.154	0.186	1	DS_vs_WT	Mavs	0.0771579	FALSE	Astrocyte_1	0.685077	0.564896	Cortex
7.38034e-05	-0.107672	0.039	0.074	0.0369755	DS_vs_WT	Wtap	0.000250308	TRUE	Astrocyte_1	0.205905	0.119181	Cortex
0.000191829	-0.108247	0.162	0.215	0.0961063	DS_vs_WT	Npc1	0.000550064	TRUE	Astrocyte_1	0.845508	0.712105	Cortex
0.0119334	-0.108745	0.063	0.09	1	DS_vs_WT	Gad2	0.0215163	TRUE	Astrocyte_1	0.330413	0.233818	Cortex
0.0276565	-0.109451	0.064	0.08	1	DS_vs_WT	Casp3	0.0430213	TRUE	Astrocyte_1	0.249403	0.158123	Cortex
0.0442425	-0.111131	0.073	0.096	1	DS_vs_WT	Glb1	0.0658107	FALSE	Astrocyte_1	0.33332	0.23447	Cortex
0.00123122	-0.111843	0.142	0.188	0.616842	DS_vs_WT	Sars	0.00293031	TRUE	Astrocyte_1	0.702561	0.575559	Cortex
0.00938145	-0.112494	0.392	0.445	1	DS_vs_WT	Anxa6	0.0174436	TRUE	Astrocyte_1	2.38419	2.13034	Cortex
6.31117e-08	-0.112545	0.118	0.18	3.1619e-05	DS_vs_WT	Cux2	3.41377e-07	TRUE	Astrocyte_1	0.826623	0.689544	Cortex
3.6539e-07	-0.11298	0.166	0.235	0.00018306	DS_vs_WT	Mapk14	1.73925e-06	TRUE	Astrocyte_1	0.792184	0.65719	Cortex
0.00553099	-0.113844	0.086	0.119	1	DS_vs_WT	Slc7a2	0.0109698	TRUE	Astrocyte_1	0.425659	0.317483	Cortex
0.00240322	-0.11391	0.171	0.217	1	DS_vs_WT	Ptch1	0.00534549	TRUE	Astrocyte_1	0.932055	0.785374	Cortex
1.41637e-08	-0.119173	0.097	0.16	7.09604e-06	DS_vs_WT	Sox5	8.64352e-08	TRUE	Astrocyte_1	0.538557	0.416572	Cortex
7.15248e-05	-0.1195	0.18	0.237	0.0358339	DS_vs_WT	Aqp4	0.000246709	TRUE	Astrocyte_1	1.09231	0.92599	Cortex
3.89035e-11	-0.121807	0.041	0.095	1.94907e-08	DS_vs_WT	Csnk1a1	3.70361e-10	TRUE	Astrocyte_1	0.261584	0.159441	Cortex
6.1466e-12	-0.126005	0.026	0.076	3.07945e-09	DS_vs_WT	Creb1	6.6495e-11	TRUE	Astrocyte_1	0.20993	0.108738	Cortex
0.00506492	-0.127117	0.35	0.405	1	DS_vs_WT	Ep300	0.0101298	TRUE	Astrocyte_1	1.81807	1.58039	Cortex
1.24669e-09	-0.127962	0.063	0.12	6.24591e-07	DS_vs_WT	Mef2c	1.02314e-08	TRUE	Astrocyte_1	0.406476	0.287099	Cortex
0.0034158	-0.127977	0.052	0.081	1	DS_vs_WT	Topbp1	0.00732398	TRUE	Astrocyte_1	0.2956	0.185621	Cortex
0.0217699	-0.133104	0.182	0.22	1	DS_vs_WT	Gli3	0.0357326	TRUE	Astrocyte_1	0.827976	0.666872	Cortex
7.46717e-05	-0.133625	0.186	0.246	0.0374105	DS_vs_WT	Mecp2	0.000250308	TRUE	Astrocyte_1	0.898576	0.730624	Cortex
0.0088439	-0.133879	0.1	0.134	1	DS_vs_WT	Ythdf1	0.0168388	TRUE	Astrocyte_1	0.436108	0.308837	Cortex
0.000404869	-0.135873	0.083	0.125	0.202839	DS_vs_WT	Sorl1	0.00110757	TRUE	Astrocyte_1	0.433395	0.30456	Cortex
1.27857e-08	-0.137218	0.144	0.218	6.40564e-06	DS_vs_WT	Arf1	8.00789e-08	TRUE	Astrocyte_1	0.797013	0.633972	Cortex
1.31326e-09	-0.140092	0.105	0.175	6.57946e-07	DS_vs_WT	Nlgn1	1.04186e-08	TRUE	Astrocyte_1	0.646847	0.49445	Cortex
2.91981e-05	-0.141778	0.249	0.319	0.0146283	DS_vs_WT	Dlg4	0.00010858	TRUE	Astrocyte_1	1.21654	1.00908	Cortex
1.52029e-06	-0.14276	0.052	0.098	0.000761666	DS_vs_WT	Rad50	6.70054e-06	TRUE	Astrocyte_1	0.29682	0.17464	Cortex
3.07596e-07	-0.14301	0.023	0.061	0.000154106	DS_vs_WT	Lamp2	1.49404e-06	TRUE	Astrocyte_1	0.194623	0.0818842	Cortex
0.02027	-0.14583	0.329	0.374	1	DS_vs_WT	Sall1	0.0339736	TRUE	Astrocyte_1	1.79108	1.52274	Cortex
3.26594e-05	-0.148934	0.051	0.091	0.0163624	DS_vs_WT	Ccnd1	0.000119584	TRUE	Astrocyte_1	0.331768	0.201143	Cortex
0.0251423	-0.149685	0.257	0.297	1	DS_vs_WT	Gsk3b	0.0401601	TRUE	Astrocyte_1	1.24164	1.02072	Cortex
0.00234563	-0.149906	0.279	0.335	1	DS_vs_WT	Wnt7a	0.0052666	TRUE	Astrocyte_1	1.39532	1.15892	Cortex
0.000217776	-0.150922	0.055	0.093	0.109106	DS_vs_WT	Prkaa1	0.000617031	TRUE	Astrocyte_1	0.296779	0.167976	Cortex
0.00361058	-0.151087	0.077	0.108	1	DS_vs_WT	Sirt5	0.00760459	TRUE	Astrocyte_1	0.34282	0.209305	Cortex
8.3673e-05	-0.154209	0.063	0.105	0.0419202	DS_vs_WT	Tgfb2	0.000272797	TRUE	Astrocyte_1	0.374807	0.235436	Cortex
1.55643e-08	-0.164509	0.086	0.149	7.79771e-06	DS_vs_WT	Jak2	9.26076e-08	TRUE	Astrocyte_1	0.527043	0.362476	Cortex
0.00289754	-0.164996	0.041	0.067	1	DS_vs_WT	Ccna2	0.00632673	TRUE	Astrocyte_1	0.323207	0.180209	Cortex
0.000181365	-0.166693	0.094	0.14	0.0908638	DS_vs_WT	Cpt1c	0.0005264	TRUE	Astrocyte_1	0.453853	0.295212	Cortex
1.88608e-09	-0.170672	0.175	0.261	9.44928e-07	DS_vs_WT	Ythdc1	1.40278e-08	TRUE	Astrocyte_1	0.946156	0.729021	Cortex
3.48576e-06	-0.174137	0.049	0.094	0.00174636	DS_vs_WT	Acadl	1.45546e-05	TRUE	Astrocyte_1	0.331685	0.180269	Cortex
6.60874e-09	-0.177069	0.07	0.133	3.31098e-06	DS_vs_WT	Wars	4.62612e-08	TRUE	Astrocyte_1	0.429637	0.264511	Cortex
4.24931e-14	-0.177944	0.01	0.057	2.1289e-11	DS_vs_WT	Ogt	5.61853e-13	TRUE	Astrocyte_1	0.168577	0.0329775	Cortex
0.0209407	-0.18097	0.344	0.383	1	DS_vs_WT	Ctnnb1	0.0346103	TRUE	Astrocyte_1	2.20608	1.82811	Cortex
4.85069e-08	-0.187937	0.091	0.157	2.4302e-05	DS_vs_WT	Crebbp	2.6848e-07	TRUE	Astrocyte_1	0.490356	0.308324	Cortex
8.62148e-05	-0.188074	0.161	0.22	0.0431936	DS_vs_WT	Lrp6	0.000277286	TRUE	Astrocyte_1	0.803672	0.583222	Cortex
0.0130401	-0.204167	0.067	0.082	1	DS_vs_WT	Pdgfra	0.023012	TRUE	Astrocyte_1	0.436288	0.246755	Cortex
4.24006e-08	-0.20445	0.113	0.184	2.12427e-05	DS_vs_WT	Fgfr2	2.4027e-07	TRUE	Astrocyte_1	0.702093	0.477195	Cortex
0.000134175	-0.205347	0.167	0.225	0.0672216	DS_vs_WT	Zhx2	0.000409405	TRUE	Astrocyte_1	0.876295	0.627367	Cortex
1.43114e-10	-0.208286	0.182	0.276	7.17003e-08	DS_vs_WT	Tle4	1.31005e-09	TRUE	Astrocyte_1	1.36716	1.04893	Cortex
9.18067e-06	-0.220602	0.083	0.135	0.00459951	DS_vs_WT	Tnr	3.58196e-05	TRUE	Astrocyte_1	0.482194	0.27203	Cortex
5.64943e-07	-0.226996	0.061	0.113	0.000283037	DS_vs_WT	Vcan	2.5857e-06	TRUE	Astrocyte_1	0.395972	0.192735	Cortex
8.2304e-08	-0.239811	0.069	0.126	4.12343e-05	DS_vs_WT	Mettl3	4.35297e-07	TRUE	Astrocyte_1	0.417996	0.200839	Cortex
3.36164e-11	-0.240166	0.088	0.168	1.68418e-08	DS_vs_WT	Itch	3.33362e-10	TRUE	Astrocyte_1	0.558011	0.319087	Cortex
8.06291e-09	-0.264061	0.137	0.219	4.03952e-06	DS_vs_WT	Fto	5.33048e-08	TRUE	Astrocyte_1	0.806999	0.504761	Cortex
5.05362e-16	-0.265709	0.055	0.139	2.53186e-13	DS_vs_WT	Mapk1	8.59115e-15	TRUE	Astrocyte_1	0.480903	0.2318	Cortex
3.73141e-07	-0.268752	0.181	0.259	0.000186944	DS_vs_WT	Jak1	1.74133e-06	TRUE	Astrocyte_1	1.04993	0.701518	Cortex
7.67073e-09	-0.281242	0.072	0.134	3.84304e-06	DS_vs_WT	Aldh9a1	5.2161e-08	TRUE	Astrocyte_1	0.469257	0.209026	Cortex
1.41904e-15	-0.298226	0.066	0.156	7.10938e-13	DS_vs_WT	Cd47	2.25154e-14	TRUE	Astrocyte_1	0.522159	0.237899	Cortex
6.7712e-17	-0.324521	0.089	0.193	3.39237e-14	DS_vs_WT	Pdia3	1.46504e-15	TRUE	Astrocyte_1	0.716162	0.370464	Cortex
2.88904e-06	-0.332861	0.095	0.153	0.00144741	DS_vs_WT	Mki67	1.22784e-05	TRUE	Astrocyte_1	1.18541	0.735129	Cortex
1.71816e-09	-0.342197	0.459	0.556	8.60801e-07	DS_vs_WT	Apc	1.31911e-08	TRUE	Astrocyte_1	3.54848	2.58802	Cortex
5.67785e-15	-0.353343	0.1	0.201	2.8446e-12	DS_vs_WT	Dcx	8.4458e-14	TRUE	Astrocyte_1	0.789612	0.400852	Cortex
5.30159e-14	-0.356247	0.073	0.16	2.6561e-11	DS_vs_WT	Vcam1	6.64094e-13	TRUE	Astrocyte_1	0.641747	0.282523	Cortex
0.000129067	-0.375712	0.054	0.092	0.0646626	DS_vs_WT	Gfap	0.000398935	TRUE	Astrocyte_1	0.906471	0.469364	Cortex
2.22347e-10	-0.388687	0.145	0.235	1.11396e-07	DS_vs_WT	Egfr	1.95995e-09	TRUE	Astrocyte_1	1.16264	0.651881	Cortex
3.10759e-17	-0.409938	0.121	0.237	1.5569e-14	DS_vs_WT	Rac1	7.39607e-16	TRUE	Astrocyte_1	1.00254	0.507227	Cortex
1.02673e-20	-0.470632	0.082	0.196	5.14393e-18	DS_vs_WT	Nras	3.05453e-19	TRUE	Astrocyte_1	0.791999	0.293194	Cortex
7.56984e-22	-0.522401	0.322	0.487	3.79249e-19	DS_vs_WT	Lamp1	2.57374e-20	TRUE	Astrocyte_1	3.25179	1.96015	Cortex
5.80865e-33	-0.699494	0.275	0.474	2.91013e-30	DS_vs_WT	Hsp90b1	2.3041e-31	TRUE	Astrocyte_1	3.15397	1.55796	Cortex
5.35332e-45	-0.725535	0.067	0.245	2.68201e-42	DS_vs_WT	Map2	4.24696e-43	TRUE	Astrocyte_1	1.10832	0.275055	Cortex
4.74447e-54	-0.827327	0.127	0.359	2.37698e-51	DS_vs_WT	Slc1a3	1.12918e-51	TRUE	Astrocyte_1	1.87246	0.618842	Cortex
1.80169e-51	-0.920385	0.623	0.806	9.02647e-49	DS_vs_WT	Fabp7	2.14401e-49	TRUE	Astrocyte_1	14.9106	7.40665	Cortex
p_val	avg_log2FC	pct.1	pct.2	p_val_adj	comparison	gene	FDR	sig	celltype	exp.1	exp.2	Cortex
1.70417e-06	1.06726	0.521	0.267	0.000853789	DS_vs_WT	Fbln2	0.000260738	TRUE	Astrocyte_2	0.960992	3.10916	Cortex
5.12694e-09	0.814723	0.941	0.918	2.5686e-06	DS_vs_WT	App	1.56884e-06	TRUE	Astrocyte_2	9.76568	17.9364	Cortex
0.000172526	0.693981	0.286	0.103	0.0864355	DS_vs_WT	Cspg4	0.00879882	TRUE	Astrocyte_2	0.337066	1.16303	Cortex
6.06138e-06	0.691467	0.336	0.108	0.00303675	DS_vs_WT	Cdkn1a	0.00061826	TRUE	Astrocyte_2	0.448962	1.33997	Cortex
0.00751386	0.62735	0.403	0.262	1	DS_vs_WT	Col1a2	0.121013	FALSE	Astrocyte_2	1.05418	2.17315	Cortex
0.0625814	0.58382	0.571	0.456	1	DS_vs_WT	Cldn5	0.402934	FALSE	Astrocyte_2	3.95553	6.42742	Cortex
0.00078686	0.57497	0.622	0.41	0.394217	DS_vs_WT	Dvl1	0.0279203	TRUE	Astrocyte_2	1.57622	2.83765	Cortex
0.00107594	0.554676	0.286	0.123	0.539044	DS_vs_WT	Olig2	0.0329237	TRUE	Astrocyte_2	0.330494	0.954281	Cortex
0.00915667	0.554548	0.412	0.251	1	DS_vs_WT	Cdkn1c	0.133426	FALSE	Astrocyte_2	1.036	1.99029	Cortex
0.0058844	0.524786	0.697	0.585	1	DS_vs_WT	Igfbp2	0.100035	FALSE	Astrocyte_2	3.97396	6.15613	Cortex
0.0325612	0.513772	0.454	0.313	1	DS_vs_WT	Col1a1	0.318591	FALSE	Astrocyte_2	1.92517	3.17649	Cortex
0.00488309	0.46815	0.286	0.149	1	DS_vs_WT	Ikbkg	0.0910074	FALSE	Astrocyte_2	0.337151	0.849727	Cortex
0.000821187	0.448034	0.639	0.421	0.411414	DS_vs_WT	Dkk3	0.0279203	TRUE	Astrocyte_2	2.23064	3.40718	Cortex
0.0247879	0.436586	0.101	0.041	1	DS_vs_WT	Ly6c1	0.287891	FALSE	Astrocyte_2	0.070127	0.448307	Cortex
0.0233346	0.407088	0.277	0.154	1	DS_vs_WT	Prdx5	0.287891	FALSE	Astrocyte_2	0.381009	0.831227	Cortex
0.105361	0.38548	0.336	0.231	1	DS_vs_WT	Cdh5	0.473146	FALSE	Astrocyte_2	0.976594	1.58201	Cortex
0.347225	0.366627	0.294	0.226	1	DS_vs_WT	Pdgfrb	0.667065	FALSE	Astrocyte_2	1.01762	1.60139	Cortex
0.0288615	0.362439	0.849	0.749	1	DS_vs_WT	Bcan	0.304538	FALSE	Astrocyte_2	6.95811	9.23092	Cortex
0.129726	0.347149	0.655	0.554	1	DS_vs_WT	Eif4g1	0.504436	FALSE	Astrocyte_2	2.72218	3.73477	Cortex
0.030575	0.345649	0.252	0.133	1	DS_vs_WT	Hsf1	0.311865	FALSE	Astrocyte_2	0.381435	0.75542	Cortex
0.1011	0.329876	0.639	0.518	1	DS_vs_WT	Tubb3	0.461742	FALSE	Astrocyte_2	3.94127	5.21071	Cortex
0.0474786	0.327293	0.269	0.154	1	DS_vs_WT	Mdga1	0.381339	FALSE	Astrocyte_2	0.437539	0.803618	Cortex
0.0675667	0.321801	0.118	0.046	1	DS_vs_WT	Kcnj8	0.413508	FALSE	Astrocyte_2	0.224711	0.530754	Cortex
0.214632	0.298588	0.42	0.344	1	DS_vs_WT	Pld3	0.561345	FALSE	Astrocyte_2	1.18241	1.68423	Cortex
0.384629	0.295256	0.269	0.215	1	DS_vs_WT	Gria1	0.681067	FALSE	Astrocyte_2	0.777582	1.18128	Cortex
0.122774	0.290749	0.681	0.574	1	DS_vs_WT	Mtor	0.504436	FALSE	Astrocyte_2	2.76783	3.60909	Cortex
0.195758	0.289277	0.109	0.056	1	DS_vs_WT	Grin1	0.554647	FALSE	Astrocyte_2	0.176127	0.43726	Cortex
0.0279122	0.285551	0.353	0.215	1	DS_vs_WT	Dyrk1a	0.304538	FALSE	Astrocyte_2	0.674311	1.04078	Cortex
0.254784	0.28343	0.437	0.359	1	DS_vs_WT	Aars	0.58182	FALSE	Astrocyte_2	1.27075	1.76369	Cortex
0.209736	0.279841	0.319	0.246	1	DS_vs_WT	Rcan1	0.558075	FALSE	Astrocyte_2	0.674465	1.0329	Cortex
0.326109	0.275689	0.286	0.236	1	DS_vs_WT	Zhx2	0.651183	FALSE	Astrocyte_2	0.708369	1.0681	Cortex
0.161092	0.272499	0.227	0.149	1	DS_vs_WT	Irf3	0.504436	FALSE	Astrocyte_2	0.375299	0.661221	Cortex
0.0483995	0.267108	0.109	0.046	1	DS_vs_WT	Cx3cl1	0.381339	FALSE	Astrocyte_2	0.0830851	0.303377	Cortex
0.00505597	0.263381	0.244	0.113	1	DS_vs_WT	Ifnar1	0.0910074	FALSE	Astrocyte_2	0.457079	0.748915	Cortex
0.266959	0.259202	0.168	0.123	1	DS_vs_WT	Sufu	0.600658	FALSE	Astrocyte_2	0.298516	0.554086	Cortex
0.242741	0.257217	0.101	0.056	1	DS_vs_WT	C1qb	0.581456	FALSE	Astrocyte_2	0.120094	0.338704	Cortex
0.354106	0.256026	0.42	0.364	1	DS_vs_WT	Tle3	0.667065	FALSE	Astrocyte_2	1.14545	1.56207	Cortex
0.129631	0.255669	0.143	0.072	1	DS_vs_WT	Esam	0.504436	FALSE	Astrocyte_2	0.219657	0.456135	Cortex
0.110038	0.248168	0.866	0.79	1	DS_vs_WT	Lrp1	0.481022	FALSE	Astrocyte_2	6.41537	7.80722	Cortex
0.178604	0.244935	0.084	0.046	1	DS_vs_WT	Fzd4	0.534996	FALSE	Astrocyte_2	0.100387	0.304002	Cortex
0.308198	0.242817	0.597	0.569	1	DS_vs_WT	Pou3f3	0.63917	FALSE	Astrocyte_2	2.83615	3.53932	Cortex
0.326868	0.240796	0.571	0.492	1	DS_vs_WT	Lmnb1	0.651183	FALSE	Astrocyte_2	2.30837	2.90932	Cortex
0.259523	0.233425	0.303	0.221	1	DS_vs_WT	Cnr1	0.588253	FALSE	Astrocyte_2	0.658015	0.949201	Cortex
0.164824	0.232659	0.168	0.097	1	DS_vs_WT	Tgfb1	0.504436	FALSE	Astrocyte_2	0.222927	0.436937	Cortex
0.253326	0.225469	0.101	0.067	1	DS_vs_WT	C4b	0.58182	FALSE	Astrocyte_2	0.169185	0.366961	Cortex
0.584034	0.222257	0.336	0.282	1	DS_vs_WT	Satb2	0.815259	FALSE	Astrocyte_2	1.82159	2.29154	Cortex
0.093609	0.220795	0.067	0.021	1	DS_vs_WT	Sox10	0.447896	FALSE	Astrocyte_2	0.0414976	0.213736	Cortex
0.23777	0.213214	0.092	0.051	1	DS_vs_WT	Cyba	0.581456	FALSE	Astrocyte_2	0.100549	0.275831	Cortex
0.343243	0.21113	0.084	0.046	1	DS_vs_WT	Ggt7	0.667065	FALSE	Astrocyte_2	0.114171	0.289758	Cortex
0.491931	0.203754	0.319	0.313	1	DS_vs_WT	Clu	0.763232	FALSE	Astrocyte_2	1.35246	1.70931	Cortex
0.319341	0.202718	0.286	0.21	1	DS_vs_WT	Fbln1	0.651183	FALSE	Astrocyte_2	0.755574	1.02043	Cortex
0.0699264	0.201787	0.176	0.159	1	DS_vs_WT	Glb1	0.419559	FALSE	Astrocyte_2	0.30192	0.497366	Cortex
0.467855	0.199631	0.101	0.072	1	DS_vs_WT	Psmb5	0.743986	FALSE	Astrocyte_2	0.206519	0.385573	Cortex
0.0632054	0.199479	0.134	0.056	1	DS_vs_WT	Tyk2	0.402934	FALSE	Astrocyte_2	0.119776	0.285821	Cortex
0.327734	0.198372	0.109	0.082	1	DS_vs_WT	Nfe2l2	0.651183	FALSE	Astrocyte_2	0.184604	0.359218	Cortex
0.0254021	0.198327	0.05	0.005	1	DS_vs_WT	Mettl14	0.287891	FALSE	Astrocyte_2	0.00663444	0.154979	Cortex
0.406557	0.197804	0.118	0.113	1	DS_vs_WT	Gsr	0.70151	FALSE	Astrocyte_2	0.35141	0.550001	Cortex
0.200326	0.197636	0.076	0.036	1	DS_vs_WT	Npy	0.558075	FALSE	Astrocyte_2	0.0665174	0.223101	Cortex
0.0961814	0.196048	0.58	0.456	1	DS_vs_WT	Vegfa	0.452792	FALSE	Astrocyte_2	2.82878	3.38608	Cortex
0.524919	0.19566	0.336	0.277	1	DS_vs_WT	Tle4	0.775967	FALSE	Astrocyte_2	1.18406	1.50129	Cortex
0.163034	0.194719	0.151	0.082	1	DS_vs_WT	Fzd7	0.504436	FALSE	Astrocyte_2	0.181613	0.352358	Cortex
0.381352	0.191609	0.16	0.128	1	DS_vs_WT	Tbk1	0.681067	FALSE	Astrocyte_2	0.326315	0.514701	Cortex
0.452387	0.189966	0.193	0.174	1	DS_vs_WT	Optn	0.732436	FALSE	Astrocyte_2	0.479166	0.68734	Cortex
0.18314	0.186346	0.697	0.595	1	DS_vs_WT	Mapt	0.534996	FALSE	Astrocyte_2	4.48891	5.24571	Cortex
0.202959	0.182465	0.16	0.097	1	DS_vs_WT	Csf2ra	0.558075	FALSE	Astrocyte_2	0.180661	0.339839	Cortex
0.2813	0.179146	0.118	0.067	1	DS_vs_WT	Rfx5	0.618399	FALSE	Astrocyte_2	0.158648	0.311837	Cortex
0.15709	0.177314	0.059	0.021	1	DS_vs_WT	Mag	0.504436	FALSE	Astrocyte_2	0.0319475	0.166902	Cortex
0.446465	0.175435	0.361	0.292	1	DS_vs_WT	Pecam1	0.732436	FALSE	Astrocyte_2	1.34484	1.64804	Cortex
0.191197	0.174389	0.092	0.041	1	DS_vs_WT	Sod1	0.546789	FALSE	Astrocyte_2	0.113279	0.25632	Cortex
0.220881	0.170288	0.05	0.031	1	DS_vs_WT	Csf3r	0.56798	FALSE	Astrocyte_2	0.0578792	0.190413	Cortex
0.685083	0.169348	0.126	0.108	1	DS_vs_WT	Prkaa1	0.848726	FALSE	Astrocyte_2	0.324654	0.489639	Cortex
0.51023	0.16866	0.218	0.169	1	DS_vs_WT	Ythdf1	0.769115	FALSE	Astrocyte_2	0.434201	0.612062	Cortex
0.11502	0.163197	0.092	0.036	1	DS_vs_WT	Ifngr1	0.495721	FALSE	Astrocyte_2	0.124294	0.258945	Cortex
0.162548	0.161365	0.067	0.026	1	DS_vs_WT	Galc	0.504436	FALSE	Astrocyte_2	0.0437703	0.167295	Cortex
0.356724	0.159454	0.126	0.077	1	DS_vs_WT	Slc17a7	0.667065	FALSE	Astrocyte_2	0.279197	0.42869	Cortex
0.50971	0.155942	0.092	0.072	1	DS_vs_WT	Abcc9	0.769115	FALSE	Astrocyte_2	0.176875	0.311215	Cortex
0.462124	0.155843	0.118	0.123	1	DS_vs_WT	Trp53	0.743986	FALSE	Astrocyte_2	0.366179	0.522023	Cortex
0.621527	0.155822	0.067	0.046	1	DS_vs_WT	Csf1r	0.827527	FALSE	Astrocyte_2	0.117661	0.245137	Cortex
0.570057	0.150527	0.16	0.144	1	DS_vs_WT	Syn1	0.80758	FALSE	Astrocyte_2	0.425925	0.582741	Cortex
0.246364	0.150225	0.076	0.051	1	DS_vs_WT	Gria4	0.581456	FALSE	Astrocyte_2	0.0860858	0.205276	Cortex
0.596222	0.147902	0.445	0.39	1	DS_vs_WT	Lrp5	0.818134	FALSE	Astrocyte_2	1.38359	1.64092	Cortex
0.211084	0.145309	0.067	0.026	1	DS_vs_WT	Gadd45a	0.558075	FALSE	Astrocyte_2	0.062099	0.174647	Cortex
0.449069	0.139836	0.244	0.185	1	DS_vs_WT	Ldlr	0.732436	FALSE	Astrocyte_2	0.673646	0.843989	Cortex
0.361872	0.131785	0.059	0.031	1	DS_vs_WT	Pex1	0.667065	FALSE	Astrocyte_2	0.0507315	0.151233	Cortex
0.408068	0.128982	0.118	0.097	1	DS_vs_WT	Grip1	0.70151	FALSE	Astrocyte_2	0.211974	0.32532	Cortex
0.573347	0.121284	0.109	0.097	1	DS_vs_WT	Axin1	0.808499	FALSE	Astrocyte_2	0.224145	0.331506	Cortex
0.586134	0.119181	0.084	0.072	1	DS_vs_WT	Sp8	0.815259	FALSE	Astrocyte_2	0.171928	0.272853	Cortex
0.129929	0.114972	0.109	0.051	1	DS_vs_WT	Foxj1	0.504436	FALSE	Astrocyte_2	0.22266	0.324085	Cortex
0.781155	0.114212	0.454	0.451	1	DS_vs_WT	Gabbr1	0.903207	FALSE	Astrocyte_2	2.09205	2.34678	Cortex
0.66858	0.112898	0.101	0.072	1	DS_vs_WT	Traf6	0.848726	FALSE	Astrocyte_2	0.237776	0.338528	Cortex
0.302094	0.102826	0.319	0.246	1	DS_vs_WT	Smurf1	0.633568	FALSE	Astrocyte_2	0.934118	1.077	Cortex
0.684588	0.101873	0.05	0.031	1	DS_vs_WT	Calb2	0.848726	FALSE	Astrocyte_2	0.116476	0.198164	Cortex
0.0751734	0.0991452	0.185	0.108	1	DS_vs_WT	Rbfox3	0.439439	FALSE	Astrocyte_2	0.346222	0.44199	Cortex
0.739412	0.0980978	0.193	0.159	1	DS_vs_WT	Cnp	0.880389	FALSE	Astrocyte_2	0.476373	0.580252	Cortex
0.309141	0.096296	0.319	0.246	1	DS_vs_WT	Psen1	0.63917	FALSE	Astrocyte_2	0.820977	0.94667	Cortex
0.00816578	0.0961377	0.05	0.005	1	DS_vs_WT	Il4ra	0.124936	FALSE	Astrocyte_2	0.0249307	0.0955567	Cortex
0.000659247	0.093236	0.042	0.108	0.330283	DS_vs_WT	Eif2ak2	0.0279203	FALSE	Astrocyte_2	0.208526	0.289208	Cortex
0.156121	0.0924302	0.084	0.097	1	DS_vs_WT	Braf	0.504436	FALSE	Astrocyte_2	0.194264	0.273282	Cortex
0.517672	0.0869317	0.05	0.026	1	DS_vs_WT	Neurod1	0.775967	FALSE	Astrocyte_2	0.0590366	0.124812	Cortex
0.523393	0.0854893	0.084	0.051	1	DS_vs_WT	Cd68	0.775967	FALSE	Astrocyte_2	0.11171	0.179577	Cortex
0.23592	0.0816262	0.059	0.067	1	DS_vs_WT	Ifi27	0.581456	FALSE	Astrocyte_2	0.13389	0.199894	Cortex
0.723618	0.0806491	0.605	0.559	1	DS_vs_WT	Nlgn2	0.872383	FALSE	Astrocyte_2	3.14625	3.38463	Cortex
0.534419	0.0776267	0.899	0.856	1	DS_vs_WT	Tnc	0.785249	FALSE	Astrocyte_2	18.6445	19.7305	Cortex
0.329258	0.0724581	0.092	0.051	1	DS_vs_WT	Cebpb	0.651183	FALSE	Astrocyte_2	0.107215	0.164244	Cortex
0.634795	0.0706087	0.084	0.056	1	DS_vs_WT	S100a10	0.837273	FALSE	Astrocyte_2	0.137178	0.194218	Cortex
0.746214	0.0701807	0.689	0.703	1	DS_vs_WT	Anxa6	0.882647	FALSE	Astrocyte_2	5.16421	5.47149	Cortex
0.774095	0.0697347	0.319	0.282	1	DS_vs_WT	Gsk3b	0.903207	FALSE	Astrocyte_2	0.931618	1.02728	Cortex
0.911717	0.0670878	0.176	0.159	1	DS_vs_WT	Acadl	0.954603	FALSE	Astrocyte_2	0.460986	0.530529	Cortex
0.881455	0.0588612	0.218	0.195	1	DS_vs_WT	Hras	0.945638	FALSE	Astrocyte_2	0.535711	0.599663	Cortex
0.684527	0.0571978	0.109	0.082	1	DS_vs_WT	Aldh4a1	0.848726	FALSE	Astrocyte_2	0.310785	0.363797	Cortex
0.915717	0.053375	0.639	0.615	1	DS_vs_WT	Notch1	0.954603	FALSE	Astrocyte_2	3.92442	4.11002	Cortex
0.377266	0.051319	0.269	0.21	1	DS_vs_WT	Flt1	0.679078	FALSE	Astrocyte_2	1.00413	1.0767	Cortex
0.890264	0.0501533	0.05	0.041	1	DS_vs_WT	Casp7	0.945638	FALSE	Astrocyte_2	0.103154	0.142178	Cortex
0.730855	0.0494598	0.067	0.046	1	DS_vs_WT	Plk3	0.8736	FALSE	Astrocyte_2	0.0867881	0.124692	Cortex
0.853394	0.0494381	0.101	0.082	1	DS_vs_WT	Traf2	0.945638	FALSE	Astrocyte_2	0.187745	0.229152	Cortex
0.649089	0.0463421	0.092	0.067	1	DS_vs_WT	Creb1	0.841376	FALSE	Astrocyte_2	0.209509	0.248991	Cortex
0.425248	0.0437895	0.084	0.051	1	DS_vs_WT	Sod3	0.719855	FALSE	Astrocyte_2	0.167888	0.20388	Cortex
0.547552	0.0412179	0.378	0.328	1	DS_vs_WT	Tle1	0.786608	FALSE	Astrocyte_2	1.06041	1.12013	Cortex
0.969861	0.0383144	0.269	0.256	1	DS_vs_WT	Gli3	0.985972	FALSE	Astrocyte_2	0.865157	0.915355	Cortex
0.0351976	0.0366509	0.084	0.036	1	DS_vs_WT	Gli1	0.326378	FALSE	Astrocyte_2	0.172684	0.202857	Cortex
0.790667	0.0365154	0.05	0.056	1	DS_vs_WT	Acot2	0.907169	FALSE	Astrocyte_2	0.155894	0.185524	Cortex
0.676019	0.0354221	0.37	0.328	1	DS_vs_WT	Vars	0.848726	FALSE	Astrocyte_2	1.07158	1.12307	Cortex
0.945058	0.0353184	0.109	0.097	1	DS_vs_WT	Txnrd3	0.970429	FALSE	Astrocyte_2	0.295791	0.327905	Cortex
0.0333167	0.0328966	0.025	0.067	1	DS_vs_WT	Nox1	0.318591	FALSE	Astrocyte_2	0.148001	0.174478	Cortex
0.985342	0.0324498	0.118	0.113	1	DS_vs_WT	Irf2	0.995098	FALSE	Astrocyte_2	0.343107	0.373659	Cortex
0.30229	0.0303221	0.076	0.041	1	DS_vs_WT	Irf9	0.633568	FALSE	Astrocyte_2	0.0937527	0.116984	Cortex
0.879556	0.0283804	0.168	0.149	1	DS_vs_WT	Trim25	0.945638	FALSE	Astrocyte_2	0.468872	0.498054	Cortex
0.471677	0.0248586	0.059	0.082	1	DS_vs_WT	Psmb9	0.743986	FALSE	Astrocyte_2	0.276606	0.298793	Cortex
0.928726	0.024771	0.311	0.318	1	DS_vs_WT	Nfkb1	0.962059	FALSE	Astrocyte_2	1.01649	1.05141	Cortex
0.594669	0.0228565	0.118	0.133	1	DS_vs_WT	Rnf5	0.818134	FALSE	Astrocyte_2	0.291509	0.312133	Cortex
0.150498	0.0203359	0.067	0.031	1	DS_vs_WT	Icam1	0.504436	FALSE	Astrocyte_2	0.106348	0.122053	Cortex
0.0673699	0.0189815	0.193	0.123	1	DS_vs_WT	Fzd8	0.413508	FALSE	Astrocyte_2	0.449899	0.469101	Cortex
0.683078	0.0184852	0.092	0.108	1	DS_vs_WT	Relb	0.848726	FALSE	Astrocyte_2	0.257458	0.273674	Cortex
0.499677	0.0173476	0.504	0.554	1	DS_vs_WT	Dtx4	0.764505	FALSE	Astrocyte_2	2.62642	2.67029	Cortex
0.976387	0.0171787	0.059	0.056	1	DS_vs_WT	Tspo	0.989319	FALSE	Astrocyte_2	0.131555	0.14511	Cortex
0.0815887	0.016399	0.109	0.159	1	DS_vs_WT	Wars	0.447896	FALSE	Astrocyte_2	0.343866	0.359229	Cortex
0.884356	0.0147161	0.126	0.113	1	DS_vs_WT	Tapbp	0.945638	FALSE	Astrocyte_2	0.359209	0.373145	Cortex
0.604171	0.012513	0.437	0.477	1	DS_vs_WT	Sall1	0.825341	FALSE	Astrocyte_2	1.74585	1.76977	Cortex
0.71584	0.0113863	0.437	0.4	1	DS_vs_WT	Notch3	0.869234	FALSE	Astrocyte_2	1.69049	1.71181	Cortex
0.99372	0.00969717	0.185	0.185	1	DS_vs_WT	Gpx1	0.997156	FALSE	Astrocyte_2	0.498618	0.508725	Cortex
0.917167	0.00962461	0.134	0.144	1	DS_vs_WT	Mettl3	0.954603	FALSE	Astrocyte_2	0.402883	0.412273	Cortex
0.376189	0.00805213	0.034	0.051	1	DS_vs_WT	Plin2	0.679078	FALSE	Astrocyte_2	0.0708219	0.0768152	Cortex
0.578271	0.00693902	0.134	0.164	1	DS_vs_WT	Gba	0.811702	FALSE	Astrocyte_2	0.536215	0.543622	Cortex
0.877093	0.00524617	0.151	0.164	1	DS_vs_WT	Vars2	0.945638	FALSE	Astrocyte_2	0.435182	0.44041	Cortex
0.0879394	0.00494229	0.294	0.215	1	DS_vs_WT	Lef1	0.447896	FALSE	Astrocyte_2	0.86366	0.870056	Cortex
1	0	1	1	1	DS_vs_WT	Unnamed: 0	1	FALSE	Astrocyte_2	1.40589e-177	9.39649e-179	Cortex
0.436636	-9.88957e-05	0.16	0.123	1	DS_vs_WT	Cpt1c	0.730112	FALSE	Astrocyte_2	0.371926	0.371832	Cortex
0.119061	-0.00329483	0.092	0.046	1	DS_vs_WT	Rgs8	0.504436	FALSE	Astrocyte_2	0.13769	0.135095	Cortex
0.082155	-0.00383117	0.176	0.123	1	DS_vs_WT	Ascl1	0.447896	FALSE	Astrocyte_2	0.463549	0.459667	Cortex
0.759205	-0.00388808	0.05	0.041	1	DS_vs_WT	Syt9	0.893526	FALSE	Astrocyte_2	0.123588	0.120564	Cortex
0.849615	-0.00407276	0.059	0.051	1	DS_vs_WT	Gpx7	0.945638	FALSE	Astrocyte_2	0.116208	0.113061	Cortex
0.282928	-0.00524399	0.168	0.118	1	DS_vs_WT	Gad1	0.618399	FALSE	Astrocyte_2	0.493264	0.487846	Cortex
0.471271	-0.00552828	0.353	0.308	1	DS_vs_WT	Mdk	0.743986	FALSE	Astrocyte_2	0.938551	0.931137	Cortex
0.385048	-0.00938912	0.445	0.385	1	DS_vs_WT	Traf3	0.681067	FALSE	Astrocyte_2	1.76092	1.74301	Cortex
0.877042	-0.0103723	0.101	0.113	1	DS_vs_WT	C1qa	0.945638	FALSE	Astrocyte_2	0.320112	0.310655	Cortex
0.402595	-0.0132079	0.05	0.077	1	DS_vs_WT	Ifit2	0.700833	FALSE	Astrocyte_2	0.226829	0.215649	Cortex
0.993897	-0.0142968	0.235	0.236	1	DS_vs_WT	Mecp2	0.997156	FALSE	Astrocyte_2	0.801083	0.783323	Cortex
0.958958	-0.0144473	0.084	0.092	1	DS_vs_WT	Mrc1	0.980694	FALSE	Astrocyte_2	0.294033	0.281139	Cortex
0.961465	-0.0157626	0.067	0.062	1	DS_vs_WT	Nr4a2	0.980694	FALSE	Astrocyte_2	0.37657	0.361611	Cortex
0.887594	-0.0172344	0.05	0.062	1	DS_vs_WT	Slc17a6	0.945638	FALSE	Astrocyte_2	0.140197	0.126657	Cortex
0.896193	-0.0201994	0.05	0.062	1	DS_vs_WT	Gstk1	0.945638	FALSE	Astrocyte_2	0.182763	0.166319	Cortex
0.495877	-0.022	0.092	0.077	1	DS_vs_WT	Alkbh5	0.763232	FALSE	Astrocyte_2	0.219527	0.201071	Cortex
0.916277	-0.0253229	0.084	0.082	1	DS_vs_WT	Gsto1	0.954603	FALSE	Astrocyte_2	0.220765	0.199524	Cortex
0.87149	-0.0266949	0.143	0.133	1	DS_vs_WT	Psmb2	0.945638	FALSE	Astrocyte_2	0.416735	0.390762	Cortex
0.782189	-0.0284604	0.092	0.113	1	DS_vs_WT	Sox5	0.903207	FALSE	Astrocyte_2	0.283363	0.258293	Cortex
0.876046	-0.0295533	0.143	0.133	1	DS_vs_WT	Anpep	0.945638	FALSE	Astrocyte_2	0.443366	0.4141	Cortex
0.44608	-0.0352286	0.05	0.036	1	DS_vs_WT	Fn1	0.732436	FALSE	Astrocyte_2	0.140653	0.113137	Cortex
0.804	-0.0362922	0.126	0.123	1	DS_vs_WT	Atf6	0.914587	FALSE	Astrocyte_2	0.31783	0.285092	Cortex
0.645563	-0.0369909	0.109	0.138	1	DS_vs_WT	Nrf1	0.841376	FALSE	Astrocyte_2	0.36351	0.328994	Cortex
0.249273	-0.0383094	0.193	0.159	1	DS_vs_WT	Cflar	0.581456	FALSE	Astrocyte_2	0.46541	0.427009	Cortex
0.875744	-0.0384254	0.076	0.077	1	DS_vs_WT	Casp4	0.945638	FALSE	Astrocyte_2	0.219536	0.187483	Cortex
0.401119	-0.0396283	0.244	0.205	1	DS_vs_WT	Mavs	0.700833	FALSE	Astrocyte_2	0.594458	0.551257	Cortex
0.0886355	-0.0407207	0.05	0.026	1	DS_vs_WT	Lhx5	0.447896	FALSE	Astrocyte_2	0.108564	0.077712	Cortex
0.211558	-0.0416628	0.21	0.169	1	DS_vs_WT	Sp1	0.558075	FALSE	Astrocyte_2	0.520186	0.476913	Cortex
0.713573	-0.0430927	0.067	0.062	1	DS_vs_WT	Psmb10	0.869234	FALSE	Astrocyte_2	0.169363	0.134951	Cortex
0.669567	-0.0440694	0.303	0.344	1	DS_vs_WT	Mapk14	0.848726	FALSE	Astrocyte_2	1.09842	1.03529	Cortex
0.810923	-0.047085	0.059	0.077	1	DS_vs_WT	Cxcl5	0.919046	FALSE	Astrocyte_2	0.235228	0.195565	Cortex
0.427436	-0.0471314	0.143	0.19	1	DS_vs_WT	Ccnd1	0.719855	FALSE	Astrocyte_2	0.499896	0.451687	Cortex
0.941923	-0.0473134	0.134	0.144	1	DS_vs_WT	Smpd1	0.970429	FALSE	Astrocyte_2	0.351552	0.307947	Cortex
0.550111	-0.050302	0.05	0.077	1	DS_vs_WT	Mx1	0.786608	FALSE	Astrocyte_2	0.196696	0.15569	Cortex
0.250824	-0.0510983	0.118	0.174	1	DS_vs_WT	Aldh9a1	0.581456	FALSE	Astrocyte_2	0.426492	0.376851	Cortex
0.884395	-0.0525425	0.05	0.051	1	DS_vs_WT	Stat2	0.945638	FALSE	Astrocyte_2	0.169817	0.127979	Cortex
0.853525	-0.0535244	0.101	0.108	1	DS_vs_WT	Fuca1	0.945638	FALSE	Astrocyte_2	0.261853	0.215896	Cortex
0.724135	-0.0537391	0.101	0.097	1	DS_vs_WT	Lhx6	0.872383	FALSE	Astrocyte_2	0.321255	0.272944	Cortex
0.747077	-0.0594396	0.05	0.072	1	DS_vs_WT	Aars2	0.882647	FALSE	Astrocyte_2	0.159962	0.113142	Cortex
0.870786	-0.0624711	0.067	0.082	1	DS_vs_WT	Hes1	0.945638	FALSE	Astrocyte_2	0.216455	0.164904	Cortex
0.894684	-0.0627503	0.193	0.215	1	DS_vs_WT	Jak2	0.945638	FALSE	Astrocyte_2	0.648597	0.578428	Cortex
0.679553	-0.0634202	0.227	0.221	1	DS_vs_WT	Acads	0.848726	FALSE	Astrocyte_2	0.64586	0.575076	Cortex
0.675166	-0.0644405	0.05	0.056	1	DS_vs_WT	Ptprd	0.848726	FALSE	Astrocyte_2	0.132682	0.0832021	Cortex
0.866874	-0.0666629	0.513	0.544	1	DS_vs_WT	Axin2	0.945638	FALSE	Astrocyte_2	2.89056	2.71488	Cortex
0.695533	-0.0667566	0.134	0.133	1	DS_vs_WT	Mdm2	0.854751	FALSE	Astrocyte_2	0.323557	0.263708	Cortex
0.651654	-0.0686019	0.176	0.215	1	DS_vs_WT	Cux2	0.841376	FALSE	Astrocyte_2	0.7188	0.638982	Cortex
0.35581	-0.0691619	0.076	0.062	1	DS_vs_WT	Clspn	0.667065	FALSE	Astrocyte_2	0.201529	0.145287	Cortex
0.730127	-0.06937	0.202	0.19	1	DS_vs_WT	Gad2	0.8736	FALSE	Astrocyte_2	0.6948	0.615236	Cortex
0.711523	-0.0695757	0.218	0.256	1	DS_vs_WT	Rac1	0.869234	FALSE	Astrocyte_2	0.807584	0.72248	Cortex
0.465016	-0.071148	0.067	0.062	1	DS_vs_WT	Lifr	0.743986	FALSE	Astrocyte_2	0.177967	0.121283	Cortex
0.503817	-0.0716462	0.034	0.062	1	DS_vs_WT	Il15ra	0.767005	FALSE	Astrocyte_2	0.14156	0.0862534	Cortex
0.930619	-0.0718124	0.092	0.087	1	DS_vs_WT	Ccn2	0.962059	FALSE	Astrocyte_2	0.537044	0.462409	Cortex
0.29528	-0.0745627	0.067	0.067	1	DS_vs_WT	Sst	0.633568	FALSE	Astrocyte_2	0.174396	0.115242	Cortex
0.544029	-0.0777799	0.042	0.072	1	DS_vs_WT	Il18	0.785249	FALSE	Astrocyte_2	0.153915	0.0933517	Cortex
0.791549	-0.0780655	0.059	0.067	1	DS_vs_WT	Ccl8	0.907169	FALSE	Astrocyte_2	0.204788	0.141328	Cortex
0.424904	-0.0798667	0.076	0.062	1	DS_vs_WT	Ddit3	0.719855	FALSE	Astrocyte_2	0.179397	0.115881	Cortex
0.844793	-0.0839917	0.252	0.262	1	DS_vs_WT	Arf1	0.945638	FALSE	Astrocyte_2	0.791258	0.689951	Cortex
0.250309	-0.0850834	0.017	0.051	1	DS_vs_WT	Cd63	0.581456	FALSE	Astrocyte_2	0.103774	0.040561	Cortex
0.661382	-0.0871306	0.042	0.062	1	DS_vs_WT	Sod2	0.848726	FALSE	Astrocyte_2	0.152738	0.0851793	Cortex
0.891222	-0.0884966	0.37	0.379	1	DS_vs_WT	Notch2	0.945638	FALSE	Astrocyte_2	1.66619	1.50755	Cortex
0.649462	-0.0922093	0.05	0.077	1	DS_vs_WT	Wtap	0.841376	FALSE	Astrocyte_2	0.22862	0.15255	Cortex
0.403094	-0.0928211	0.025	0.051	1	DS_vs_WT	Mif	0.700833	FALSE	Astrocyte_2	0.100668	0.0320821	Cortex
0.151319	-0.100833	0.529	0.462	1	DS_vs_WT	Pink1	0.504436	FALSE	Astrocyte_2	2.40519	2.17532	Cortex
0.778016	-0.108345	0.143	0.169	1	DS_vs_WT	Gstm1	0.903207	FALSE	Astrocyte_2	0.517476	0.407689	Cortex
0.634667	-0.108566	0.084	0.113	1	DS_vs_WT	Sirt5	0.837273	FALSE	Astrocyte_2	0.26614	0.174356	Cortex
0.29855	-0.108813	0.311	0.277	1	DS_vs_WT	Lrp6	0.633568	FALSE	Astrocyte_2	0.974062	0.830649	Cortex
0.250574	-0.109511	0.05	0.097	1	DS_vs_WT	Sirt1	0.581456	FALSE	Astrocyte_2	0.282224	0.188496	Cortex
0.360959	-0.109631	0.042	0.072	1	DS_vs_WT	Cr1l	0.667065	FALSE	Astrocyte_2	0.152973	0.0686039	Cortex
0.775639	-0.111077	0.143	0.169	1	DS_vs_WT	Kif7	0.903207	FALSE	Astrocyte_2	0.496733	0.38582	Cortex
0.311797	-0.114199	0.16	0.144	1	DS_vs_WT	Myc	0.640335	FALSE	Astrocyte_2	0.486946	0.373782	Cortex
0.189353	-0.11431	0.017	0.056	1	DS_vs_WT	Sirt3	0.546622	FALSE	Astrocyte_2	0.117185	0.0320827	Cortex
0.0570896	-0.11691	0.025	0.077	1	DS_vs_WT	Ccna2	0.388209	FALSE	Astrocyte_2	0.230989	0.135169	Cortex
0.694412	-0.119119	0.134	0.144	1	DS_vs_WT	H2afx	0.854751	FALSE	Astrocyte_2	0.491493	0.373291	Cortex
0.521599	-0.123129	0.076	0.072	1	DS_vs_WT	Nos1	0.775967	FALSE	Astrocyte_2	0.239158	0.137787	Cortex
0.0893454	-0.124809	0.109	0.082	1	DS_vs_WT	Rars	0.447896	FALSE	Astrocyte_2	0.358721	0.246118	Cortex
0.183577	-0.125514	0.605	0.554	1	DS_vs_WT	Ctnnb1	0.534996	FALSE	Astrocyte_2	3.48627	3.11246	Cortex
0.209365	-0.126858	0.017	0.051	1	DS_vs_WT	Traf5	0.558075	FALSE	Astrocyte_2	0.120264	0.0259651	Cortex
0.61999	-0.127642	0.21	0.205	1	DS_vs_WT	Prdx6	0.827527	FALSE	Astrocyte_2	0.789783	0.638235	Cortex
0.428149	-0.127759	0.202	0.19	1	DS_vs_WT	Aldh2	0.719855	FALSE	Astrocyte_2	0.661689	0.520864	Cortex
0.55629	-0.129328	0.168	0.215	1	DS_vs_WT	Tnr	0.791743	FALSE	Astrocyte_2	1.33534	1.1351	Cortex
0.609599	-0.12993	0.05	0.077	1	DS_vs_WT	B2m	0.827527	FALSE	Astrocyte_2	0.22999	0.124058	Cortex
0.621997	-0.130358	0.134	0.164	1	DS_vs_WT	Tnfrsf1a	0.827527	FALSE	Astrocyte_2	0.411308	0.289378	Cortex
0.619623	-0.131415	0.992	0.995	1	DS_vs_WT	Ncan	0.827527	FALSE	Astrocyte_2	45.7411	41.6716	Cortex
0.651265	-0.134339	0.235	0.282	1	DS_vs_WT	Cux1	0.841376	FALSE	Astrocyte_2	0.921697	0.750834	Cortex
0.49635	-0.136035	0.05	0.072	1	DS_vs_WT	Mef2c	0.763232	FALSE	Astrocyte_2	0.19727	0.0895357	Cortex
0.0567805	-0.136151	0.008	0.056	1	DS_vs_WT	Tfam	0.388209	FALSE	Astrocyte_2	0.112825	0.0126081	Cortex
0.593708	-0.137012	0.118	0.123	1	DS_vs_WT	Qars	0.818134	FALSE	Astrocyte_2	0.383407	0.258071	Cortex
0.366534	-0.137642	0.126	0.185	1	DS_vs_WT	Psme1	0.668366	FALSE	Astrocyte_2	0.526332	0.387441	Cortex
0.30094	-0.140903	0.084	0.138	1	DS_vs_WT	Cxcr4	0.633568	FALSE	Astrocyte_2	0.433396	0.300021	Cortex
0.796011	-0.141738	0.134	0.159	1	DS_vs_WT	Grin2b	0.908879	FALSE	Astrocyte_2	0.633197	0.480374	Cortex
0.163232	-0.149933	0.025	0.072	1	DS_vs_WT	Pdk3	0.504436	FALSE	Astrocyte_2	0.208282	0.0890149	Cortex
0.15632	-0.154857	0.084	0.092	1	DS_vs_WT	Atrip	0.504436	FALSE	Astrocyte_2	0.265443	0.136648	Cortex
0.540505	-0.155329	0.286	0.297	1	DS_vs_WT	Dlg4	0.785249	FALSE	Astrocyte_2	1.0249	0.818216	Cortex
0.445624	-0.160866	0.034	0.056	1	DS_vs_WT	Cxcl13	0.732436	FALSE	Astrocyte_2	0.20715	0.0797813	Cortex
0.148547	-0.164686	0.025	0.072	1	DS_vs_WT	Npc2	0.504436	FALSE	Astrocyte_2	0.165808	0.040044	Cortex
0.282688	-0.165974	0.235	0.215	1	DS_vs_WT	Arx	0.618399	FALSE	Astrocyte_2	0.821018	0.623122	Cortex
0.613273	-0.16614	0.277	0.282	1	DS_vs_WT	Otx1	0.827527	FALSE	Astrocyte_2	1.05409	0.830651	Cortex
0.542618	-0.167898	0.034	0.056	1	DS_vs_WT	Trp53bp1	0.785249	FALSE	Astrocyte_2	0.230406	0.0952322	Cortex
0.250048	-0.171298	0.084	0.133	1	DS_vs_WT	Rad50	0.581456	FALSE	Astrocyte_2	0.289396	0.145039	Cortex
0.247803	-0.172107	0.168	0.154	1	DS_vs_WT	Gusb	0.581456	FALSE	Astrocyte_2	0.492783	0.324912	Cortex
0.174067	-0.173664	0.017	0.056	1	DS_vs_WT	Dgat1	0.52737	FALSE	Astrocyte_2	0.161447	0.0297257	Cortex
0.140133	-0.175001	0.42	0.39	1	DS_vs_WT	Bcl2l2	0.504436	FALSE	Astrocyte_2	1.67878	1.37278	Cortex
0.0533329	-0.1762	0.008	0.056	1	DS_vs_WT	Rad9a	0.381339	FALSE	Astrocyte_2	0.14488	0.0132547	Cortex
0.142435	-0.179344	0.101	0.174	1	DS_vs_WT	Cd74	0.504436	FALSE	Astrocyte_2	0.678799	0.482555	Cortex
0.366946	-0.182132	0.092	0.128	1	DS_vs_WT	Sorl1	0.668366	FALSE	Astrocyte_2	0.358465	0.19735	Cortex
0.202805	-0.184477	0.034	0.082	1	DS_vs_WT	Nbn	0.558075	FALSE	Astrocyte_2	0.238587	0.0899174	Cortex
0.537172	-0.186795	0.059	0.082	1	DS_vs_WT	Casp3	0.785249	FALSE	Astrocyte_2	0.310276	0.151149	Cortex
0.183343	-0.187796	0.05	0.108	1	DS_vs_WT	Myd88	0.534996	FALSE	Astrocyte_2	0.267745	0.113012	Cortex
0.357706	-0.191959	0.151	0.215	1	DS_vs_WT	Itch	0.667065	FALSE	Astrocyte_2	0.609945	0.409372	Cortex
0.491099	-0.200073	0.193	0.241	1	DS_vs_WT	Crebbp	0.763232	FALSE	Astrocyte_2	0.787316	0.55587	Cortex
0.00295684	-0.201174	0	0.051	1	DS_vs_WT	Kitl	0.0695994	FALSE	Astrocyte_2	0.149633	0	Cortex
0.0986086	-0.207893	0.034	0.082	1	DS_vs_WT	Hus1	0.457185	FALSE	Astrocyte_2	0.208474	0.0462978	Cortex
0.164065	-0.216295	0.017	0.056	1	DS_vs_WT	Fzd5	0.504436	FALSE	Astrocyte_2	0.204296	0.0366255	Cortex
0.450734	-0.218207	0.092	0.123	1	DS_vs_WT	Wnt7b	0.732436	FALSE	Astrocyte_2	0.442577	0.240088	Cortex
0.204692	-0.221373	0.05	0.097	1	DS_vs_WT	Ifnar2	0.558075	FALSE	Astrocyte_2	0.258785	0.079721	Cortex
0.22503	-0.227951	0.084	0.149	1	DS_vs_WT	Mapk1	0.569085	FALSE	Astrocyte_2	0.50096	0.28159	Cortex
0.150187	-0.232265	0.487	0.6	1	DS_vs_WT	Lamp1	0.504436	FALSE	Astrocyte_2	3.86356	3.14034	Cortex
0.353644	-0.236354	0.134	0.19	1	DS_vs_WT	Egfr	0.667065	FALSE	Astrocyte_2	0.637882	0.390378	Cortex
0.0250599	-0.23715	0.008	0.067	1	DS_vs_WT	Ogt	0.287891	FALSE	Astrocyte_2	0.201677	0.0195266	Cortex
0.0244293	-0.237261	0.042	0.128	1	DS_vs_WT	Cd47	0.287891	FALSE	Astrocyte_2	0.327563	0.126244	Cortex
0.345183	-0.243318	0.445	0.508	1	DS_vs_WT	Ep300	0.667065	FALSE	Astrocyte_2	2.21827	1.7188	Cortex
0.146542	-0.244093	0.042	0.087	1	DS_vs_WT	Smurf2	0.504436	FALSE	Astrocyte_2	0.268173	0.0707778	Cortex
0.0529411	-0.247765	0.042	0.118	1	DS_vs_WT	Lamp2	0.381339	FALSE	Astrocyte_2	0.350857	0.137692	Cortex
0.334372	-0.249392	0.328	0.344	1	DS_vs_WT	Txnrd1	0.655884	FALSE	Astrocyte_2	1.42833	1.04283	Cortex
0.0874144	-0.258447	0.345	0.369	1	DS_vs_WT	Jak1	0.447896	FALSE	Astrocyte_2	1.31629	0.936389	Cortex
0.0535869	-0.259601	0.025	0.082	1	DS_vs_WT	H2-Eb1	0.381339	FALSE	Astrocyte_2	0.24492	0.0399051	Cortex
0.300547	-0.261786	0.168	0.231	1	DS_vs_WT	Pdia3	0.633568	FALSE	Astrocyte_2	0.71354	0.429187	Cortex
0.224373	-0.264233	0.143	0.215	1	DS_vs_WT	Slc7a2	0.569085	FALSE	Astrocyte_2	0.647	0.37136	Cortex
0.273013	-0.265103	0.218	0.282	1	DS_vs_WT	Gli2	0.609796	FALSE	Astrocyte_2	0.935735	0.610801	Cortex
0.0925129	-0.266122	0.076	0.108	1	DS_vs_WT	Topbp1	0.447896	FALSE	Astrocyte_2	0.390213	0.156034	Cortex
0.219788	-0.269199	0.294	0.39	1	DS_vs_WT	Slc1a3	0.56798	FALSE	Astrocyte_2	1.64663	1.19612	Cortex
0.0521903	-0.274892	0.084	0.179	1	DS_vs_WT	Vcam1	0.381339	FALSE	Astrocyte_2	0.458642	0.205586	Cortex
0.329848	-0.277335	0.109	0.164	1	DS_vs_WT	Vcan	0.651183	FALSE	Astrocyte_2	0.562856	0.289534	Cortex
0.127248	-0.284415	0.361	0.39	1	DS_vs_WT	Ikbkb	0.504436	FALSE	Astrocyte_2	1.51026	1.06111	Cortex
0.153624	-0.305249	0.303	0.349	1	DS_vs_WT	Npc1	0.504436	FALSE	Astrocyte_2	1.24503	0.816911	Cortex
0.10669	-0.306197	0.815	0.81	1	DS_vs_WT	Aldh1l1	0.473146	FALSE	Astrocyte_2	10.2188	8.07346	Cortex
0.164848	-0.309079	0.109	0.185	1	DS_vs_WT	Otud4	0.504436	FALSE	Astrocyte_2	0.653328	0.334495	Cortex
0.076112	-0.311767	0.21	0.272	1	DS_vs_WT	Sars	0.439439	FALSE	Astrocyte_2	0.806779	0.455639	Cortex
0.228593	-0.314199	0.319	0.405	1	DS_vs_WT	Foxo1	0.573357	FALSE	Astrocyte_2	1.79518	1.24815	Cortex
0.47743	-0.338236	0.101	0.118	1	DS_vs_WT	Reln	0.749198	FALSE	Astrocyte_2	0.872364	0.481054	Cortex
0.0380497	-0.345618	0.118	0.231	1	DS_vs_WT	Nras	0.342447	FALSE	Astrocyte_2	0.774304	0.396326	Cortex
0.019981	-0.351657	0.042	0.133	1	DS_vs_WT	Csnk1a1	0.277917	FALSE	Astrocyte_2	0.43069	0.121208	Cortex
0.142481	-0.359938	0.303	0.385	1	DS_vs_WT	Ythdc1	0.504436	FALSE	Astrocyte_2	1.47522	0.928689	Cortex
0.0809873	-0.360073	0.168	0.21	1	DS_vs_WT	Hif1a	0.447896	FALSE	Astrocyte_2	0.757571	0.369367	Cortex
0.127589	-0.362432	0.126	0.205	1	DS_vs_WT	Tgfb2	0.504436	FALSE	Astrocyte_2	0.719065	0.337178	Cortex
0.150189	-0.378098	0.067	0.113	1	DS_vs_WT	Cxcl12	0.504436	FALSE	Astrocyte_2	0.57703	0.213448	Cortex
0.140873	-0.392015	0.143	0.231	1	DS_vs_WT	Pdgfra	0.504436	FALSE	Astrocyte_2	1.10142	0.60142	Cortex
0.0467534	-0.392822	0.462	0.518	1	DS_vs_WT	Hsp90b1	0.381339	FALSE	Astrocyte_2	2.74728	1.85408	Cortex
0.0936776	-0.405718	0.185	0.236	1	DS_vs_WT	Ptch1	0.447896	FALSE	Astrocyte_2	0.86893	0.410781	Cortex
0.0892073	-0.430552	0.101	0.174	1	DS_vs_WT	Mki67	0.447896	FALSE	Astrocyte_2	0.753798	0.301279	Cortex
1.40605e-05	-0.44186	0.319	0.579	0.00704431	DS_vs_WT	Gfap	0.00107563	TRUE	Astrocyte_2	23.9464	17.3651	Cortex
0.0597675	-0.445314	0.076	0.154	1	DS_vs_WT	Dcx	0.397584	FALSE	Astrocyte_2	0.62579	0.19402	Cortex
0.0507682	-0.475539	0.244	0.333	1	DS_vs_WT	Wnt7a	0.381339	FALSE	Astrocyte_2	1.27058	0.632999	Cortex
0.00347983	-0.47825	0.067	0.2	1	DS_vs_WT	Nlgn1	0.0760591	FALSE	Astrocyte_2	0.714521	0.230765	Cortex
0.145621	-0.478843	0.37	0.467	1	DS_vs_WT	Aqp4	0.504436	FALSE	Astrocyte_2	4.17464	2.71308	Cortex
0.0489049	-0.500749	0.218	0.323	1	DS_vs_WT	Fto	0.381339	FALSE	Astrocyte_2	1.32909	0.646063	Cortex
0.00198386	-0.557762	0.084	0.231	0.993912	DS_vs_WT	Map2	0.0551873	FALSE	Astrocyte_2	0.855176	0.260323	Cortex
0.00294757	-0.598346	0.118	0.262	1	DS_vs_WT	Fgfr2	0.0695994	FALSE	Astrocyte_2	0.996103	0.318448	Cortex
0.00398186	-0.60974	0.429	0.513	1	DS_vs_WT	Apc	0.08123	FALSE	Astrocyte_2	2.89418	1.55191	Cortex
4.72849e-05	-0.872372	0.739	0.831	0.0236897	DS_vs_WT	Fabp7	0.00289383	TRUE	Astrocyte_2	13.8742	7.12499	Cortex
p_val	avg_log2FC	pct.1	pct.2	p_val_adj	comparison	gene	FDR	sig	celltype	exp.1	exp.2	Cortex
1.58648e-45	1.05081	0.45	0.209	7.94829e-43	DS_vs_WT	Fbln1	1.23217e-43	TRUE	Fibroblast	1.2772	3.71766	Cortex
7.81254e-79	0.978213	0.889	0.691	3.91408e-76	DS_vs_WT	App	1.82032e-76	TRUE	Fibroblast	12.4735	25.543	Cortex
5.74365e-43	0.858256	0.704	0.472	2.87757e-40	DS_vs_WT	Cdkn1c	3.34567e-41	TRUE	Fibroblast	5.4086	10.6178	Cortex
2.23959e-32	0.739296	0.471	0.256	1.12204e-29	DS_vs_WT	Dkk3	6.52281e-31	TRUE	Fibroblast	1.50683	3.18481	Cortex
2.81522e-49	0.739196	0.847	0.665	1.41042e-46	DS_vs_WT	Lrp1	3.27973e-47	TRUE	Fibroblast	8.95027	15.6094	Cortex
4.43354e-39	0.702464	0.872	0.694	2.2212e-36	DS_vs_WT	Col1a2	2.06603e-37	TRUE	Fibroblast	14.632	24.4376	Cortex
3.74668e-25	0.684111	0.372	0.197	1.87709e-22	DS_vs_WT	Dvl1	7.93616e-24	TRUE	Fibroblast	0.846034	1.96605	Cortex
3.5198e-33	0.672525	0.556	0.335	1.76342e-30	DS_vs_WT	Lrp5	1.17159e-31	TRUE	Fibroblast	1.83803	3.52342	Cortex
1.4151e-35	0.669517	0.704	0.473	7.08965e-33	DS_vs_WT	Igfbp2	5.4953e-34	TRUE	Fibroblast	9.25607	15.3127	Cortex
3.4549e-29	0.659667	0.326	0.146	1.7309e-26	DS_vs_WT	Fzd7	8.94434e-28	TRUE	Fibroblast	0.61273	1.54766	Cortex
2.18588e-25	0.610245	0.91	0.872	1.09513e-22	DS_vs_WT	Col1a1	5.09311e-24	TRUE	Fibroblast	48.3361	74.3124	Cortex
4.87382e-17	0.501314	0.402	0.249	2.44179e-14	DS_vs_WT	Notch2	9.46334e-16	TRUE	Fibroblast	1.49796	2.53587	Cortex
1.25271e-15	0.491936	0.196	0.09	6.27606e-13	DS_vs_WT	Gabbr1	1.82425e-14	TRUE	Fibroblast	0.332997	0.874635	Cortex
4.54192e-16	0.489642	0.257	0.136	2.2755e-13	DS_vs_WT	Gli2	7.55905e-15	TRUE	Fibroblast	0.462451	1.05342	Cortex
1.51978e-15	0.484986	0.159	0.062	7.61411e-13	DS_vs_WT	Acan	2.08299e-14	TRUE	Fibroblast	0.300425	0.820039	Cortex
2.06673e-06	0.433511	0.272	0.191	0.00103543	DS_vs_WT	Ccn2	8.44821e-06	TRUE	Fibroblast	1.5554	2.45111	Cortex
7.41948e-17	0.416537	0.178	0.072	3.71716e-14	DS_vs_WT	Cebpb	1.3298e-15	TRUE	Fibroblast	0.311138	0.750003	Cortex
3.71976e-12	0.41494	0.159	0.074	1.8636e-09	DS_vs_WT	Il13ra2	3.76827e-11	TRUE	Fibroblast	0.266343	0.688343	Cortex
2.45461e-08	0.413448	0.164	0.091	1.22976e-05	DS_vs_WT	Notch3	1.29983e-07	TRUE	Fibroblast	0.482699	0.974755	Cortex
1.16023e-14	0.412655	0.217	0.107	5.81278e-12	DS_vs_WT	Tmem119	1.50186e-13	TRUE	Fibroblast	0.448706	0.92842	Cortex
1.00776e-10	0.378082	0.201	0.109	5.04885e-08	DS_vs_WT	Rcan1	8.69655e-10	TRUE	Fibroblast	0.439133	0.870315	Cortex
8.89213e-10	0.355375	0.136	0.065	4.45496e-07	DS_vs_WT	Cdkn1a	6.09372e-09	TRUE	Fibroblast	0.235124	0.580117	Cortex
2.07959e-12	0.348745	0.286	0.17	1.04187e-09	DS_vs_WT	Pld3	2.42272e-11	TRUE	Fibroblast	0.777317	1.26333	Cortex
3.7511e-11	0.338705	0.164	0.079	1.8793e-08	DS_vs_WT	Ifnar1	3.36156e-10	TRUE	Fibroblast	0.314157	0.661911	Cortex
8.98128e-09	0.336109	0.128	0.062	4.49962e-06	DS_vs_WT	Sod3	5.36574e-08	TRUE	Fibroblast	0.276894	0.611884	Cortex
1.14435e-09	0.334332	0.17	0.09	5.73322e-07	DS_vs_WT	Irf3	7.61813e-09	TRUE	Fibroblast	0.321747	0.66645	Cortex
5.52761e-10	0.318508	0.136	0.063	2.76933e-07	DS_vs_WT	Prdx5	4.15463e-09	TRUE	Fibroblast	0.25051	0.559436	Cortex
4.73469e-05	0.317722	0.389	0.311	0.0237208	DS_vs_WT	Vegfa	0.00015322	TRUE	Fibroblast	2.47535	3.33154	Cortex
3.63559e-12	0.314279	0.341	0.219	1.82143e-09	DS_vs_WT	Pdgfrb	3.76827e-11	TRUE	Fibroblast	1.48661	2.09183	Cortex
1.52858e-10	0.309353	0.142	0.065	7.65819e-08	DS_vs_WT	Cyba	1.272e-09	TRUE	Fibroblast	0.236475	0.53218	Cortex
3.25762e-12	0.300797	0.255	0.147	1.63207e-09	DS_vs_WT	Pink1	3.6144e-11	TRUE	Fibroblast	0.79711	1.21373	Cortex
0.000379952	0.295684	0.075	0.046	0.190356	DS_vs_WT	Kcnj8	0.000912161	TRUE	Fibroblast	0.191783	0.462874	Cortex
2.69083e-11	0.294168	0.242	0.14	1.34811e-08	DS_vs_WT	Gpx1	2.50785e-10	TRUE	Fibroblast	0.637259	1.00757	Cortex
2.27049e-08	0.283174	0.446	0.336	1.13751e-05	DS_vs_WT	Nlgn2	1.23029e-07	TRUE	Fibroblast	1.8352	2.45007	Cortex
0.00118312	0.280034	0.314	0.254	0.592745	DS_vs_WT	Axin2	0.00250607	TRUE	Fibroblast	1.97152	2.60809	Cortex
4.33471e-09	0.271151	0.155	0.08	2.17169e-06	DS_vs_WT	Ifnar2	2.65786e-08	TRUE	Fibroblast	0.263726	0.525027	Cortex
9.30527e-16	0.266568	0.123	0.042	4.66194e-13	DS_vs_WT	Gria1	1.44542e-14	TRUE	Fibroblast	0.246829	0.499864	Cortex
7.86498e-05	0.264257	0.083	0.044	0.0394036	DS_vs_WT	Thbs1	0.000237992	TRUE	Fibroblast	0.1974	0.438097	Cortex
1.80088e-08	0.261521	0.298	0.201	9.02242e-06	DS_vs_WT	Foxo1	9.99061e-08	TRUE	Fibroblast	1.00668	1.40549	Cortex
8.68411e-10	0.248475	0.152	0.076	4.35074e-07	DS_vs_WT	Myc	6.09372e-09	TRUE	Fibroblast	0.311641	0.558165	Cortex
1.20209e-07	0.248226	0.329	0.233	6.02249e-05	DS_vs_WT	Bcl2l2	5.60176e-07	TRUE	Fibroblast	1.14714	1.55026	Cortex
3.42002e-08	0.238353	0.37	0.268	1.71343e-05	DS_vs_WT	Mtor	1.66014e-07	TRUE	Fibroblast	1.35722	1.78069	Cortex
8.32868e-08	0.232426	0.253	0.166	4.17267e-05	DS_vs_WT	Ikbkb	3.96037e-07	TRUE	Fibroblast	0.717379	1.01759	Cortex
4.13238e-06	0.225134	0.141	0.082	0.00207032	DS_vs_WT	Gsdmd	1.60474e-05	TRUE	Fibroblast	0.296807	0.515819	Cortex
5.88229e-06	0.223756	0.086	0.044	0.00294703	DS_vs_WT	Psmb5	2.17824e-05	TRUE	Fibroblast	0.119012	0.306748	Cortex
0.000114062	0.218477	0.228	0.164	0.057145	DS_vs_WT	Tle1	0.000319677	TRUE	Fibroblast	0.817634	1.11483	Cortex
1.14647e-06	0.216214	0.176	0.108	0.000574383	DS_vs_WT	Gli3	4.77015e-06	TRUE	Fibroblast	0.431317	0.662734	Cortex
2.99103e-08	0.215749	0.114	0.053	1.4985e-05	DS_vs_WT	Kif7	1.51502e-07	TRUE	Fibroblast	0.184325	0.375365	Cortex
7.12048e-07	0.21399	0.127	0.068	0.000356736	DS_vs_WT	Ikbkg	3.19052e-06	TRUE	Fibroblast	0.251509	0.451615	Cortex
7.06034e-05	0.209929	0.269	0.199	0.0353723	DS_vs_WT	Vars	0.000219341	TRUE	Fibroblast	0.879634	1.17404	Cortex
2.80629e-08	0.204072	0.061	0.019	1.40595e-05	DS_vs_WT	Sod1	1.45304e-07	TRUE	Fibroblast	0.061871	0.223217	Cortex
0.00158537	0.198237	0.146	0.102	0.794271	DS_vs_WT	Notch1	0.00313044	TRUE	Fibroblast	0.402546	0.609134	Cortex
1.04431e-06	0.196855	0.196	0.128	0.000523199	DS_vs_WT	C1qb	4.42408e-06	TRUE	Fibroblast	1.19164	1.51205	Cortex
0.000172583	0.194087	0.191	0.135	0.086464	DS_vs_WT	C1qa	0.000451818	TRUE	Fibroblast	1.03384	1.32671	Cortex
1.69138e-08	0.194077	0.144	0.076	8.4738e-06	DS_vs_WT	Icam1	9.61197e-08	TRUE	Fibroblast	0.300822	0.488129	Cortex
4.21553e-05	0.193249	0.152	0.097	0.0211198	DS_vs_WT	Dyrk1a	0.000140317	TRUE	Fibroblast	0.36852	0.564678	Cortex
1.33087e-08	0.188906	0.166	0.093	6.66767e-06	DS_vs_WT	Tspo	7.75234e-08	TRUE	Fibroblast	0.359699	0.54992	Cortex
3.1861e-08	0.186008	0.087	0.035	1.59624e-05	DS_vs_WT	Fzd8	1.57949e-07	TRUE	Fibroblast	0.129416	0.284836	Cortex
0.00418688	0.182674	0.086	0.057	1	DS_vs_WT	Hras	0.00750417	TRUE	Fibroblast	0.193896	0.355055	Cortex
0.000119926	0.18164	0.114	0.068	0.060083	DS_vs_WT	Mdga1	0.000328739	TRUE	Fibroblast	0.250588	0.418383	Cortex
2.38032e-09	0.181449	0.23	0.143	1.19254e-06	DS_vs_WT	Acads	1.49896e-08	TRUE	Fibroblast	0.581878	0.793885	Cortex
2.5169e-10	0.180876	0.092	0.034	1.26097e-07	DS_vs_WT	Alkbh5	1.9548e-09	TRUE	Fibroblast	0.120554	0.270229	Cortex
7.15634e-05	0.179698	0.139	0.087	0.0358533	DS_vs_WT	Ldlr	0.000219398	TRUE	Fibroblast	0.317491	0.492252	Cortex
8.06016e-10	0.179465	0.296	0.199	4.03814e-07	DS_vs_WT	Mdk	5.8688e-09	TRUE	Fibroblast	1.01386	1.28063	Cortex
6.78816e-05	0.167813	0.065	0.03	0.0340087	DS_vs_WT	Trem2	0.000213735	TRUE	Fibroblast	0.1324	0.272086	Cortex
0.000330244	0.16533	0.141	0.093	0.165452	DS_vs_WT	Qars	0.000809967	TRUE	Fibroblast	0.36296	0.528454	Cortex
2.48759e-05	0.159018	0.081	0.04	0.0124628	DS_vs_WT	Csf2rb	8.40014e-05	TRUE	Fibroblast	0.150564	0.284636	Cortex
4.62573e-05	0.146553	0.207	0.146	0.0231749	DS_vs_WT	Aldh2	0.000151802	TRUE	Fibroblast	0.613751	0.786295	Cortex
0.000417175	0.143413	0.097	0.058	0.209005	DS_vs_WT	Cx3cr1	0.000972018	TRUE	Fibroblast	0.336463	0.476142	Cortex
9.07036e-05	0.136527	0.104	0.061	0.0454425	DS_vs_WT	Slc7a2	0.000264174	TRUE	Fibroblast	0.252306	0.376604	Cortex
0.00150724	0.132894	0.151	0.107	0.755125	DS_vs_WT	Cspg4	0.00302747	TRUE	Fibroblast	0.493736	0.637869	Cortex
0.0146969	0.130662	0.104	0.074	1	DS_vs_WT	Optn	0.0234547	TRUE	Fibroblast	0.226403	0.342661	Cortex
0.00135984	0.130118	0.063	0.034	0.681278	DS_vs_WT	H2-DMb1	0.00285443	TRUE	Fibroblast	0.108918	0.213581	Cortex
0.00379328	0.129511	0.171	0.127	1	DS_vs_WT	Smurf1	0.00685144	TRUE	Fibroblast	0.520552	0.663367	Cortex
0.00787411	0.128383	0.313	0.261	1	DS_vs_WT	Cldn5	0.0137945	TRUE	Fibroblast	3.74737	4.1892	Cortex
0.000197526	0.127605	0.256	0.195	0.0989608	DS_vs_WT	Anpep	0.000504057	TRUE	Fibroblast	1.06376	1.25461	Cortex
3.259e-06	0.126349	0.06	0.023	0.00163276	DS_vs_WT	Ccl8	1.28703e-05	TRUE	Fibroblast	0.0750796	0.173479	Cortex
8.09889e-05	0.1255	0.052	0.021	0.0405755	DS_vs_WT	Traf3ip2	0.000241928	TRUE	Fibroblast	0.0659413	0.16282	Cortex
0.000613863	0.125191	0.332	0.27	0.307546	DS_vs_WT	Cdh5	0.00134934	TRUE	Fibroblast	2.1487	2.43413	Cortex
0.00211177	0.123896	0.192	0.144	1	DS_vs_WT	Tgfb1	0.00406647	TRUE	Fibroblast	0.638704	0.785653	Cortex
2.07683e-05	0.122463	0.3	0.229	0.0104049	DS_vs_WT	Nfkb1	7.11621e-05	TRUE	Fibroblast	1.0679	1.2511	Cortex
5.68574e-13	0.116678	0.242	0.145	2.84856e-10	DS_vs_WT	Tubb3	6.97251e-12	TRUE	Fibroblast	0.908647	1.06942	Cortex
0.0285928	0.115761	0.13	0.098	1	DS_vs_WT	Gsk3b	0.0432606	TRUE	Fibroblast	0.344203	0.456507	Cortex
0.000401314	0.113734	0.05	0.022	0.201059	DS_vs_WT	Gli1	0.000944508	TRUE	Fibroblast	0.079532	0.168081	Cortex
1.0002e-06	0.109937	0.152	0.093	0.000501099	DS_vs_WT	Tapbp	4.31566e-06	TRUE	Fibroblast	0.377378	0.486441	Cortex
0.0031435	0.109838	0.051	0.027	1	DS_vs_WT	Rela	0.00581298	TRUE	Fibroblast	0.07399	0.158951	Cortex
0.000115249	0.10552	0.054	0.023	0.0577395	DS_vs_WT	Ikbke	0.000319677	TRUE	Fibroblast	0.0643044	0.145066	Cortex
0.0374329	0.105392	0.187	0.151	1	DS_vs_WT	Txnrd1	0.0545116	FALSE	Fibroblast	0.704876	0.834083	Cortex
4.59986e-06	0.104301	0.06	0.025	0.00230453	DS_vs_WT	Il5ra	1.757e-05	TRUE	Fibroblast	0.0963852	0.178585	Cortex
1.33616e-09	0.103757	0.119	0.059	6.69415e-07	DS_vs_WT	Tyk2	8.64791e-09	TRUE	Fibroblast	0.247371	0.340385	Cortex
0.210505	0.103637	0.074	0.058	1	DS_vs_WT	Ptgs2	0.255457	FALSE	Fibroblast	0.252337	0.34561	Cortex
8.21408e-06	0.10023	0.218	0.154	0.00411525	DS_vs_WT	Fbln2	2.94443e-05	TRUE	Fibroblast	1.15374	1.30869	Cortex
0.0109081	0.0992452	0.098	0.067	1	DS_vs_WT	Aldh4a1	0.0180255	FALSE	Fibroblast	0.201111	0.286645	Cortex
0.0909572	0.0979232	0.105	0.081	1	DS_vs_WT	Glb1	0.121103	FALSE	Fibroblast	0.291908	0.382641	Cortex
0.000124929	0.0972529	0.252	0.188	0.0625895	DS_vs_WT	Ncan	0.000338471	FALSE	Fibroblast	1.52373	1.69972	Cortex
0.000127387	0.0970224	0.055	0.025	0.0638208	DS_vs_WT	Osmr	0.000341162	FALSE	Fibroblast	0.0904176	0.166271	Cortex
1.63723e-05	0.0961439	0.051	0.02	0.00820252	DS_vs_WT	Gstm1	5.69365e-05	FALSE	Fibroblast	0.0870631	0.161975	Cortex
0.0900295	0.0959075	0.086	0.064	1	DS_vs_WT	C1qc	0.120557	FALSE	Fibroblast	0.361073	0.45463	Cortex
0.297006	0.0957204	0.122	0.105	1	DS_vs_WT	Mecp2	0.349507	FALSE	Fibroblast	0.38313	0.478011	Cortex
0.000453716	0.0925652	0.365	0.301	0.227312	DS_vs_WT	Ctnnb1	0.00104669	FALSE	Fibroblast	2.09155	2.29641	Cortex
0.139745	0.0918479	0.087	0.067	1	DS_vs_WT	Smpd1	0.175057	FALSE	Fibroblast	0.219073	0.299207	Cortex
0.00954616	0.0910285	0.057	0.033	1	DS_vs_WT	Tlr2	0.0161178	FALSE	Fibroblast	0.112005	0.184429	Cortex
0.001991	0.0897436	0.062	0.034	0.997491	DS_vs_WT	Mdm2	0.00389834	FALSE	Fibroblast	0.114632	0.18617	Cortex
0.000106647	0.0864006	0.09	0.053	0.0534303	DS_vs_WT	Clu	0.000306775	FALSE	Fibroblast	0.237331	0.313697	Cortex
5.60456e-05	0.0843188	0.092	0.054	0.0280789	DS_vs_WT	Nrf1	0.000178885	FALSE	Fibroblast	0.208763	0.281514	Cortex
0.131532	0.0842343	0.058	0.043	1	DS_vs_WT	Traf5	0.16747	FALSE	Fibroblast	0.129413	0.197318	Cortex
0.000593967	0.0836288	0.227	0.175	0.297577	DS_vs_WT	Dtx4	0.00131804	FALSE	Fibroblast	0.889686	1.00246	Cortex
0.00146141	0.0833289	0.054	0.028	0.732169	DS_vs_WT	Gsto1	0.00298435	FALSE	Fibroblast	0.105698	0.171442	Cortex
0.138987	0.0831397	0.094	0.074	1	DS_vs_WT	Dlg4	0.175048	FALSE	Fibroblast	0.223344	0.295914	Cortex
0.0289828	0.0814465	0.074	0.05	1	DS_vs_WT	Irf2	0.0435677	FALSE	Fibroblast	0.174648	0.242869	Cortex
0.00742727	0.0810607	0.073	0.046	1	DS_vs_WT	Aldh1l1	0.0131102	FALSE	Fibroblast	0.237321	0.308832	Cortex
0.00142738	0.0779232	0.137	0.098	0.71512	DS_vs_WT	Sufu	0.00294319	FALSE	Fibroblast	0.375224	0.451545	Cortex
0.0106052	0.0774521	0.149	0.114	1	DS_vs_WT	Lef1	0.01765	FALSE	Fibroblast	0.565365	0.6517	Cortex
0.000628405	0.0734717	0.117	0.078	0.314831	DS_vs_WT	Trp53	0.0013684	FALSE	Fibroblast	0.366587	0.437985	Cortex
0.000182064	0.0686034	0.161	0.115	0.0912141	DS_vs_WT	Traf3	0.000471344	FALSE	Fibroblast	0.510655	0.584225	Cortex
0.00618482	0.0673458	0.107	0.075	1	DS_vs_WT	Csf2ra	0.0110005	FALSE	Fibroblast	0.29226	0.354013	Cortex
0.358422	0.0649481	0.063	0.05	1	DS_vs_WT	H2afx	0.4054	FALSE	Fibroblast	0.190815	0.245649	Cortex
0.0830641	0.064256	0.103	0.079	1	DS_vs_WT	Vars2	0.113847	FALSE	Fibroblast	0.249772	0.306694	Cortex
0.388934	0.0616131	0.063	0.051	1	DS_vs_WT	Acadl	0.437786	FALSE	Fibroblast	0.176367	0.227694	Cortex
0.0172591	0.0596707	0.201	0.164	1	DS_vs_WT	Mavs	0.026989	FALSE	Fibroblast	0.689874	0.761234	Cortex
0.00156079	0.0594623	0.215	0.17	0.781954	DS_vs_WT	Tle3	0.00310823	FALSE	Fibroblast	0.756727	0.830645	Cortex
0.0873489	0.0588048	0.128	0.103	1	DS_vs_WT	Sars	0.118327	FALSE	Fibroblast	0.380761	0.438204	Cortex
0.069008	0.0584861	0.066	0.046	1	DS_vs_WT	Plk3	0.0957075	FALSE	Fibroblast	0.160307	0.208312	Cortex
0.0176579	0.0579783	0.07	0.047	1	DS_vs_WT	Fzd4	0.0274287	FALSE	Fibroblast	0.172515	0.220595	Cortex
0.0280955	0.0574602	0.184	0.151	1	DS_vs_WT	Mapt	0.0427859	FALSE	Fibroblast	0.857065	0.932522	Cortex
0.04228	0.0512064	0.156	0.128	1	DS_vs_WT	Sall1	0.0608101	FALSE	Fibroblast	0.698215	0.759573	Cortex
0.01345	0.0494087	0.052	0.032	1	DS_vs_WT	Cxcl13	0.0217629	FALSE	Fibroblast	0.1108	0.149501	Cortex
0.573791	0.0480394	0.057	0.048	1	DS_vs_WT	Cnr1	0.601223	FALSE	Fibroblast	0.213269	0.254349	Cortex
0.000575	0.0468983	0.059	0.032	0.288075	DS_vs_WT	Prdx6	0.00128822	FALSE	Fibroblast	0.1324	0.169816	Cortex
0.3513	0.0443713	0.063	0.05	1	DS_vs_WT	Ifngr1	0.399283	FALSE	Fibroblast	0.2018	0.239337	Cortex
0.022481	0.0429368	0.053	0.034	1	DS_vs_WT	Ddit3	0.0346893	FALSE	Fibroblast	0.133637	0.167883	Cortex
0.632629	0.0407765	0.051	0.044	1	DS_vs_WT	Hes1	0.655123	FALSE	Fibroblast	0.152186	0.185216	Cortex
1.183e-05	0.0376093	0.183	0.131	0.00592683	DS_vs_WT	Crebbp	4.17635e-05	FALSE	Fibroblast	0.609314	0.651818	Cortex
0.695684	0.0363524	0.056	0.049	1	DS_vs_WT	Atrip	0.71094	FALSE	Fibroblast	0.153947	0.183394	Cortex
0.56305	0.035922	0.095	0.084	1	DS_vs_WT	Ythdf1	0.596321	FALSE	Fibroblast	0.317394	0.350608	Cortex
0.624128	0.0358037	0.057	0.048	1	DS_vs_WT	Relb	0.649205	FALSE	Fibroblast	0.170846	0.200267	Cortex
0.000112199	0.0341274	0.075	0.044	0.0562118	DS_vs_WT	Traf2	0.00031881	FALSE	Fibroblast	0.200418	0.229153	Cortex
0.101124	0.0320773	0.084	0.066	1	DS_vs_WT	Nfe2l2	0.133118	FALSE	Fibroblast	0.250585	0.278703	Cortex
0.000383656	0.0277824	0.05	0.026	0.192211	DS_vs_WT	Serpine1	0.000912161	FALSE	Fibroblast	0.12399	0.145845	Cortex
0.44691	0.0268322	0.057	0.046	1	DS_vs_WT	Fuca1	0.493508	FALSE	Fibroblast	0.134678	0.155979	Cortex
0.000254484	0.0263778	0.176	0.134	0.127496	DS_vs_WT	Tnfrsf1a	0.000630794	FALSE	Fibroblast	0.5685	0.597441	Cortex
0.30604	0.0257355	0.092	0.078	1	DS_vs_WT	Cpt1c	0.354763	FALSE	Fibroblast	0.271396	0.294279	Cortex
0.00297767	0.0187601	0.182	0.146	1	DS_vs_WT	Trim25	0.00559513	FALSE	Fibroblast	0.736912	0.759646	Cortex
0.304261	0.0184612	0.118	0.13	1	DS_vs_WT	Cflar	0.354465	FALSE	Fibroblast	0.480835	0.499906	Cortex
0.000520269	0.0120642	0.063	0.039	0.260655	DS_vs_WT	Lhx6	0.00117692	FALSE	Fibroblast	0.200025	0.210102	Cortex
0.0948579	0.00669549	0.072	0.056	1	DS_vs_WT	Mx1	0.125579	FALSE	Fibroblast	0.24852	0.254328	Cortex
0.183793	0.00446415	0.067	0.055	1	DS_vs_WT	Siglec1	0.225388	FALSE	Fibroblast	0.229891	0.233703	Cortex
8.21324e-06	0.00297071	0.272	0.216	0.00411483	DS_vs_WT	Aars	2.94443e-05	FALSE	Fibroblast	1.06942	1.07369	Cortex
0.328406	0.00060712	0.084	0.072	1	DS_vs_WT	Psmb2	0.376919	FALSE	Fibroblast	0.29587	0.296416	Cortex
1	0	1	1	1	DS_vs_WT	Unnamed: 0	1	FALSE	Fibroblast	1.20274e-177	1.15273e-178	Cortex
0.49161	-0.00121112	0.112	0.103	1	DS_vs_WT	Hif1a	0.53777	FALSE	Fibroblast	0.451788	0.45057	Cortex
0.522195	-0.00140073	0.051	0.058	1	DS_vs_WT	Gpx7	0.558126	FALSE	Fibroblast	0.20534	0.20417	Cortex
0.00834615	-0.00153537	0.31	0.271	1	DS_vs_WT	Lamp1	0.0145123	FALSE	Fibroblast	1.82881	1.8258	Cortex
0.000232615	-0.00419855	0.122	0.089	0.11654	DS_vs_WT	Il6ra	0.000582789	FALSE	Fibroblast	0.502846	0.498479	Cortex
0.00147296	-0.00802286	0.381	0.333	0.737954	DS_vs_WT	Pdgfra	0.00298435	FALSE	Fibroblast	2.81951	2.79833	Cortex
0.57542	-0.00822015	0.059	0.053	1	DS_vs_WT	Esam	0.601223	FALSE	Fibroblast	0.243699	0.236633	Cortex
0.403647	-0.0105993	0.044	0.053	1	DS_vs_WT	Prkaa1	0.449998	FALSE	Fibroblast	0.176708	0.168094	Cortex
0.143125	-0.0123115	0.087	0.075	1	DS_vs_WT	Ifi27	0.178333	FALSE	Fibroblast	0.280425	0.269545	Cortex
0.414581	-0.0146499	0.041	0.05	1	DS_vs_WT	Gad1	0.459987	FALSE	Fibroblast	0.197059	0.184965	Cortex
0.956776	-0.017563	0.183	0.182	1	DS_vs_WT	Tnc	0.9609	FALSE	Fibroblast	1.05986	1.03493	Cortex
0.894321	-0.0181175	0.088	0.093	1	DS_vs_WT	Fabp7	0.902064	FALSE	Fibroblast	0.440294	0.42232	Cortex
0.0104227	-0.0217054	0.382	0.345	1	DS_vs_WT	Eif4g1	0.0174712	FALSE	Fibroblast	2.24246	2.19404	Cortex
0.00370839	-0.0248128	0.289	0.253	1	DS_vs_WT	Ep300	0.00680358	FALSE	Fibroblast	1.33697	1.29712	Cortex
0.00246611	-0.0253084	0.159	0.132	1	DS_vs_WT	Sp1	0.00467157	FALSE	Fibroblast	0.576983	0.54956	Cortex
0.298814	-0.0261296	0.132	0.122	1	DS_vs_WT	Arf1	0.349867	FALSE	Fibroblast	0.538939	0.511317	Cortex
0.497271	-0.0303926	0.06	0.058	1	DS_vs_WT	Jak2	0.539164	FALSE	Fibroblast	0.230519	0.204868	Cortex
0.0128306	-0.0356865	0.15	0.127	1	DS_vs_WT	Psen1	0.0210531	FALSE	Fibroblast	0.577329	0.53879	Cortex
0.806125	-0.0389764	0.061	0.066	1	DS_vs_WT	Ccnd1	0.820206	FALSE	Fibroblast	0.279806	0.245694	Cortex
0.826028	-0.0393783	0.097	0.101	1	DS_vs_WT	Cux1	0.836802	FALSE	Fibroblast	0.395426	0.357853	Cortex
0.0348462	-0.0407361	0.111	0.095	1	DS_vs_WT	S100a10	0.0513872	FALSE	Fibroblast	0.447065	0.406777	Cortex
0.513589	-0.0417575	0.058	0.058	1	DS_vs_WT	Aldh9a1	0.551457	FALSE	Fibroblast	0.224343	0.189414	Cortex
0.568648	-0.0424792	0.087	0.085	1	DS_vs_WT	Myd88	0.599525	FALSE	Fibroblast	0.338373	0.29954	Cortex
0.488103	-0.0449486	0.077	0.076	1	DS_vs_WT	Npc1	0.536452	FALSE	Fibroblast	0.326259	0.285575	Cortex
0.157825	-0.0474927	0.092	0.084	1	DS_vs_WT	Tbk1	0.195602	FALSE	Fibroblast	0.363439	0.319286	Cortex
0.0698931	-0.0489127	0.059	0.048	1	DS_vs_WT	Egfr	0.0963616	FALSE	Fibroblast	0.210255	0.169911	Cortex
0.6719	-0.0505246	0.087	0.092	1	DS_vs_WT	Otud4	0.689659	FALSE	Fibroblast	0.35056	0.304081	Cortex
0.114403	-0.0510618	0.063	0.058	1	DS_vs_WT	Ptch1	0.14727	FALSE	Fibroblast	0.243365	0.200128	Cortex
0.00844837	-0.0512407	0.1	0.084	1	DS_vs_WT	Psme1	0.0145813	FALSE	Fibroblast	0.342921	0.296061	Cortex
0.318534	-0.0565619	0.125	0.121	1	DS_vs_WT	Gba	0.367418	FALSE	Fibroblast	0.544279	0.484906	Cortex
0.557928	-0.0573428	0.062	0.072	1	DS_vs_WT	Cd47	0.593594	FALSE	Fibroblast	0.287558	0.237385	Cortex
0.170623	-0.0574215	0.036	0.051	1	DS_vs_WT	Csnk1a1	0.210345	FALSE	Fibroblast	0.153357	0.108353	Cortex
0.640713	-0.064762	0.215	0.221	1	DS_vs_WT	Jak1	0.660558	FALSE	Fibroblast	1.07823	0.987005	Cortex
0.0271546	-0.0652341	0.098	0.087	1	DS_vs_WT	Cd68	0.0416251	FALSE	Fibroblast	0.424725	0.361738	Cortex
0.497512	-0.0709598	0.107	0.113	1	DS_vs_WT	Zhx2	0.539164	FALSE	Fibroblast	0.441512	0.372326	Cortex
0.135289	-0.0719313	0.039	0.055	1	DS_vs_WT	Rars	0.171317	FALSE	Fibroblast	0.166738	0.109992	Cortex
0.042678	-0.0721923	0.083	0.074	1	DS_vs_WT	Tle4	0.0610059	FALSE	Fibroblast	0.325324	0.260637	Cortex
0.015043	-0.0723226	0.189	0.165	1	DS_vs_WT	Pecam1	0.0238437	FALSE	Fibroblast	1.12809	1.02403	Cortex
0.0132636	-0.0741333	0.052	0.045	1	DS_vs_WT	Pou3f3	0.0216113	FALSE	Fibroblast	0.21922	0.158152	Cortex
0.101773	-0.0749322	0.087	0.085	1	DS_vs_WT	Rad9a	0.133219	FALSE	Fibroblast	0.370062	0.300719	Cortex
0.214264	-0.0752758	0.156	0.151	1	DS_vs_WT	Fto	0.258671	FALSE	Fibroblast	0.617247	0.535027	Cortex
0.241341	-0.0756566	0.051	0.066	1	DS_vs_WT	Mettl3	0.289844	FALSE	Fibroblast	0.236041	0.172892	Cortex
7.78222e-07	-0.0793583	0.571	0.508	0.000389889	DS_vs_WT	Anxa6	3.42124e-06	FALSE	Fibroblast	5.28803	4.95149	Cortex
0.107625	-0.0812632	0.059	0.079	1	DS_vs_WT	Rad50	0.139813	FALSE	Fibroblast	0.286018	0.215582	Cortex
0.115852	-0.0823267	0.043	0.05	1	DS_vs_WT	Npc2	0.148316	FALSE	Fibroblast	0.181302	0.115779	Cortex
0.247263	-0.0854277	0.125	0.126	1	DS_vs_WT	Hsf1	0.29394	FALSE	Fibroblast	0.516866	0.429654	Cortex
0.0891516	-0.0854687	0.246	0.237	1	DS_vs_WT	Lrp6	0.120071	FALSE	Fibroblast	1.22044	1.09272	Cortex
0.058641	-0.0875964	0.051	0.052	1	DS_vs_WT	Axin1	0.0828083	FALSE	Fibroblast	0.227102	0.154812	Cortex
0.50746	-0.0903226	0.229	0.237	1	DS_vs_WT	Lmnb1	0.547399	FALSE	Fibroblast	1.35382	1.21098	Cortex
0.00242775	-0.0941165	0.063	0.058	1	DS_vs_WT	Fcgr3	0.00463661	FALSE	Fibroblast	0.281107	0.2002	Cortex
0.0593204	-0.0958198	0.057	0.06	1	DS_vs_WT	Topbp1	0.083263	FALSE	Fibroblast	0.238942	0.159328	Cortex
0.399995	-0.101491	0.17	0.18	1	DS_vs_WT	Gusb	0.448071	FALSE	Fibroblast	0.883667	0.755708	Cortex
0.280791	-0.105379	0.069	0.082	1	DS_vs_WT	B2m	0.332103	FALSE	Fibroblast	0.382539	0.285154	Cortex
0.242573	-0.109012	0.19	0.215	1	DS_vs_WT	Ythdc1	0.289844	FALSE	Fibroblast	0.918922	0.779269	Cortex
0.00951688	-0.110755	0.07	0.07	1	DS_vs_WT	Atf6	0.0161178	TRUE	Fibroblast	0.273054	0.17898	Cortex
0.330007	-0.110942	0.143	0.16	1	DS_vs_WT	Fgfr2	0.376919	FALSE	Fibroblast	0.713462	0.586637	Cortex
0.0681165	-0.118711	0.05	0.06	1	DS_vs_WT	Wars	0.0950368	FALSE	Fibroblast	0.239648	0.141728	Cortex
0.0161151	-0.120748	0.037	0.06	1	DS_vs_WT	Prdx2	0.0253704	TRUE	Fibroblast	0.217134	0.119411	Cortex
0.198197	-0.129917	0.184	0.203	1	DS_vs_WT	Apc	0.24178	FALSE	Fibroblast	0.940846	0.773709	Cortex
0.0333776	-0.152814	0.057	0.073	1	DS_vs_WT	Slc1a3	0.0495349	TRUE	Fibroblast	0.326591	0.193261	Cortex
0.0837487	-0.164716	0.078	0.091	1	DS_vs_WT	Flt1	0.114114	FALSE	Fibroblast	0.482696	0.322719	Cortex
0.000477318	-0.172947	0.03	0.058	0.239136	DS_vs_WT	Eif2ak2	0.00109034	TRUE	Fibroblast	0.220627	0.0827315	Cortex
0.10801	-0.176838	0.151	0.149	1	DS_vs_WT	Csf1r	0.139813	FALSE	Fibroblast	1.44547	1.16336	Cortex
0.0137958	-0.177089	0.211	0.224	1	DS_vs_WT	Mapk14	0.0221685	TRUE	Fibroblast	1.04781	0.811262	Cortex
0.0308152	-0.180904	0.098	0.125	1	DS_vs_WT	Rac1	0.0460253	TRUE	Fibroblast	0.594561	0.406642	Cortex
0.000199027	-0.185616	0.034	0.068	0.0997123	DS_vs_WT	Lamp2	0.000504057	TRUE	Fibroblast	0.273705	0.119935	Cortex
0.00378388	-0.187652	0.044	0.068	1	DS_vs_WT	Plin2	0.00685144	TRUE	Fibroblast	0.29735	0.139117	Cortex
5.88965e-06	-0.192137	0.036	0.074	0.00295072	DS_vs_WT	Cr1l	2.17824e-05	TRUE	Fibroblast	0.23788	0.0835266	Cortex
0.00871004	-0.192307	0.086	0.12	1	DS_vs_WT	Lum	0.0149224	TRUE	Fibroblast	0.5606	0.365845	Cortex
0.00140489	-0.212173	0.173	0.166	0.703851	DS_vs_WT	Fn1	0.00292268	TRUE	Fibroblast	1.07873	0.794435	Cortex
8.88088e-05	-0.216409	0.06	0.104	0.0444932	DS_vs_WT	Nras	0.00026193	TRUE	Fibroblast	0.408696	0.212472	Cortex
0.000371428	-0.218498	0.049	0.074	0.186085	DS_vs_WT	Vcan	0.000901487	TRUE	Fibroblast	0.307423	0.123678	Cortex
0.000777209	-0.22046	0.087	0.117	0.389382	DS_vs_WT	Itch	0.00167676	TRUE	Fibroblast	0.467388	0.259447	Cortex
0.000140198	-0.245592	0.078	0.113	0.0702393	DS_vs_WT	Pdia3	0.000371207	TRUE	Fibroblast	0.460675	0.232035	Cortex
0.0362053	-0.255826	0.104	0.108	1	DS_vs_WT	Cd163	0.0530555	FALSE	Fibroblast	1.06381	0.728453	Cortex
0.0471875	-0.257049	0.135	0.157	1	DS_vs_WT	Satb2	0.0670408	FALSE	Fibroblast	1.11965	0.773717	Cortex
0.000803291	-0.257866	0.194	0.17	0.402449	DS_vs_WT	Lyve1	0.00171713	TRUE	Fibroblast	2.02261	1.52788	Cortex
0.00313969	-0.292478	0.074	0.105	1	DS_vs_WT	Mki67	0.00581298	TRUE	Fibroblast	0.675172	0.367775	Cortex
3.1826e-06	-0.316627	0.074	0.117	0.00159448	DS_vs_WT	Wtap	1.27853e-05	TRUE	Fibroblast	0.529627	0.228207	Cortex
1.35942e-07	-0.400313	0.036	0.082	6.81069e-05	DS_vs_WT	Nos2	6.21068e-07	TRUE	Fibroblast	0.48624	0.126115	Cortex
0.0392849	-0.414925	0.053	0.066	1	DS_vs_WT	Gfap	0.0568534	FALSE	Fibroblast	0.773023	0.329871	Cortex
0.00203774	-0.46761	0.146	0.183	1	DS_vs_WT	Mrc1	0.00395661	TRUE	Fibroblast	2.37972	1.44408	Cortex
1.6368e-10	-0.49535	0.242	0.349	8.20037e-08	DS_vs_WT	Hsp90b1	1.31508e-09	TRUE	Fibroblast	2.44947	1.44702	Cortex
7.87306e-12	-0.592309	0.231	0.281	3.9444e-09	DS_vs_WT	Cxcl12	7.64342e-11	TRUE	Fibroblast	2.28628	1.17972	Cortex
p_val	avg_log2FC	pct.1	pct.2	p_val_adj	comparison	gene	FDR	sig	celltype	exp.1	exp.2	Cortex
4.40465e-07	0.756105	0.062	0.006	0.000220673	DS_vs_WT	Col1a1	1.98209e-05	TRUE	Interneuron_1	0.0402158	0.756846	Cortex
0.0222935	0.483013	0.092	0.072	1	DS_vs_WT	Lhx6	0.125401	FALSE	Interneuron_1	0.747958	1.44305	Cortex
0.0195359	0.4385	0.119	0.068	1	DS_vs_WT	Arx	0.125401	FALSE	Interneuron_1	0.673911	1.26848	Cortex
0.0394068	0.404497	0.073	0.041	1	DS_vs_WT	Rbfox3	0.173031	FALSE	Interneuron_1	0.380702	0.827535	Cortex
0.0167836	0.401227	0.05	0.022	1	DS_vs_WT	Smurf1	0.125401	FALSE	Interneuron_1	0.158435	0.529864	Cortex
0.043724	0.343598	0.067	0.033	1	DS_vs_WT	Rcan1	0.173031	FALSE	Interneuron_1	0.273871	0.616436	Cortex
0.0604487	0.333621	0.502	0.457	1	DS_vs_WT	App	0.193769	FALSE	Interneuron_1	9.03364	11.6441	Cortex
0.121812	0.328485	0.06	0.035	1	DS_vs_WT	Traf3	0.274077	FALSE	Interneuron_1	0.342263	0.685472	Cortex
0.165039	0.301244	0.273	0.229	1	DS_vs_WT	Lrp1	0.322902	FALSE	Interneuron_1	2.86671	3.76459	Cortex
0.0499866	0.280579	0.243	0.242	1	DS_vs_WT	Tubb3	0.173031	FALSE	Interneuron_1	3.34955	4.28332	Cortex
0.101802	0.273186	0.069	0.039	1	DS_vs_WT	Ctnnb1	0.241111	FALSE	Interneuron_1	0.478778	0.787064	Cortex
0.198231	0.222004	0.303	0.285	1	DS_vs_WT	Ncan	0.356816	FALSE	Interneuron_1	3.34707	4.07022	Cortex
0.0782189	0.212651	0.087	0.1	1	DS_vs_WT	Sst	0.195547	FALSE	Interneuron_1	1.31405	1.68156	Cortex
0.345046	0.200697	0.089	0.065	1	DS_vs_WT	Dvl1	0.517569	FALSE	Interneuron_1	0.730415	0.988686	Cortex
0.164957	0.196511	0.351	0.294	1	DS_vs_WT	Apc	0.322902	FALSE	Interneuron_1	3.27555	3.89945	Cortex
0.153286	0.19584	0.06	0.035	1	DS_vs_WT	Sars	0.322902	FALSE	Interneuron_1	0.404684	0.608911	Cortex
0.518907	0.174519	0.096	0.081	1	DS_vs_WT	Gabbr1	0.729714	FALSE	Interneuron_1	0.703521	0.922574	Cortex
0.289311	0.169873	0.085	0.083	1	DS_vs_WT	Anxa6	0.464964	FALSE	Interneuron_1	0.746166	0.964367	Cortex
0.620767	0.15517	0.06	0.05	1	DS_vs_WT	Syn1	0.767486	FALSE	Interneuron_1	0.472613	0.639832	Cortex
0.0732015	0.0926962	0.071	0.083	1	DS_vs_WT	Pou3f3	0.193769	FALSE	Interneuron_1	0.756121	0.872659	Cortex
0.620268	0.0804927	0.05	0.039	1	DS_vs_WT	Sall1	0.767486	FALSE	Interneuron_1	0.389547	0.469278	Cortex
0.0673743	0.0628342	0.144	0.17	1	DS_vs_WT	Eif4g1	0.193769	FALSE	Interneuron_1	1.75044	1.87287	Cortex
0.924844	0.0591181	0.17	0.165	1	DS_vs_WT	Nlgn2	0.967187	FALSE	Interneuron_1	1.78887	1.90552	Cortex
0.238676	0.0432521	0.055	0.065	1	DS_vs_WT	Nfkb1	0.397794	FALSE	Interneuron_1	0.552067	0.599303	Cortex
0.303071	0.0298987	0.06	0.046	1	DS_vs_WT	Grip1	0.470283	FALSE	Interneuron_1	0.491099	0.522323	Cortex
0.672897	0.021493	0.151	0.163	1	DS_vs_WT	Gria1	0.796852	FALSE	Interneuron_1	2.33233	2.38235	Cortex
0.22664	0.0184482	0.839	0.8	1	DS_vs_WT	Gad1	0.392261	FALSE	Interneuron_1	10.0555	10.1978	Cortex
0.93274	0.0176812	0.071	0.067	1	DS_vs_WT	Txnrd1	0.967187	FALSE	Interneuron_1	0.713903	0.735038	Cortex
0.191812	0.00745427	0.06	0.043	1	DS_vs_WT	Fbln2	0.356816	FALSE	Interneuron_1	0.543623	0.551619	Cortex
0.756373	0.000130787	0.062	0.068	1	DS_vs_WT	Mtor	0.830166	FALSE	Interneuron_1	0.709351	0.709506	Cortex
1	0	1	1	1	DS_vs_WT	Unnamed: 0	1	FALSE	Interneuron_1	3.71924e-178	1.17372e-178	Cortex
0.0476726	-0.0049205	0.289	0.338	1	DS_vs_WT	Mapt	0.173031	FALSE	Interneuron_1	5.35068	5.32906	Cortex
0.945694	-0.0255245	0.05	0.05	1	DS_vs_WT	Vars	0.967187	FALSE	Interneuron_1	0.413409	0.388622	Cortex
0.721278	-0.0605223	0.062	0.061	1	DS_vs_WT	Dtx4	0.815997	FALSE	Interneuron_1	0.725245	0.654367	Cortex
0.364392	-0.0694128	0.073	0.092	1	DS_vs_WT	Aars	0.528955	FALSE	Interneuron_1	0.783885	0.700089	Cortex
0.631044	-0.0838559	0.071	0.072	1	DS_vs_WT	Ythdc1	0.767486	FALSE	Interneuron_1	0.612962	0.521883	Cortex
0.572789	-0.0971954	0.14	0.163	1	DS_vs_WT	Cnr1	0.767486	FALSE	Interneuron_1	2.29434	2.07971	Cortex
0.725331	-0.121782	0.055	0.065	1	DS_vs_WT	Mecp2	0.815997	FALSE	Interneuron_1	0.541569	0.416782	Cortex
0.598915	-0.16007	0.094	0.109	1	DS_vs_WT	Wnt7a	0.767486	FALSE	Interneuron_1	1.17742	0.948752	Cortex
0.0345217	-0.22947	0.023	0.052	1	DS_vs_WT	Cux2	0.172609	FALSE	Interneuron_1	0.485036	0.266658	Cortex
0.0699673	-0.308763	0.05	0.067	1	DS_vs_WT	Gad2	0.193769	FALSE	Interneuron_1	0.79063	0.445636	Cortex
0.0147752	-0.487498	0.149	0.168	1	DS_vs_WT	Lmnb1	0.125401	FALSE	Interneuron_1	2.42676	1.44418	Cortex
0.00265061	-0.498196	0.046	0.104	1	DS_vs_WT	Hsp90b1	0.0397592	TRUE	Interneuron_1	1.01762	0.42846	Cortex
0.00734652	-0.535954	0.016	0.05	1	DS_vs_WT	Fabp7	0.0826484	FALSE	Interneuron_1	0.671303	0.152702	Cortex
0.00115809	-0.736784	0.078	0.146	0.580202	DS_vs_WT	Satb2	0.026057	TRUE	Interneuron_1	2.21745	0.930716	Cortex
p_val	avg_log2FC	pct.1	pct.2	p_val_adj	comparison	gene	FDR	sig	celltype	exp.1	exp.2	Cortex
5.91301e-192	0.874742	0.304	0.13	2.96242e-189	DS_vs_WT	Col1a1	1.20625e-189	TRUE	Interneuron_3	0.511842	1.77224	Cortex
1.35119e-111	0.589633	0.522	0.397	6.76948e-109	DS_vs_WT	Dvl1	9.18812e-110	TRUE	Interneuron_3	2.01492	3.53704	Cortex
5.46292e-83	0.409165	0.897	0.854	2.73692e-80	DS_vs_WT	App	2.78609e-81	TRUE	Interneuron_3	19.7259	26.5222	Cortex
1.51679e-65	0.398704	0.546	0.417	7.59913e-63	DS_vs_WT	Arx	6.18851e-64	TRUE	Interneuron_3	2.58495	3.72613	Cortex
2.23428e-56	0.392816	0.303	0.197	1.11937e-53	DS_vs_WT	Cdkn1c	5.06437e-55	TRUE	Interneuron_3	0.926057	1.52882	Cortex
9.36375e-39	0.382517	0.463	0.394	4.69124e-36	DS_vs_WT	Pou3f3	1.12365e-37	TRUE	Interneuron_3	2.28291	3.27965	Cortex
1.0379e-60	0.350521	0.79	0.726	5.19989e-58	DS_vs_WT	Ncan	2.64665e-59	TRUE	Interneuron_3	8.36898	10.9456	Cortex
7.76183e-54	0.327239	0.732	0.684	3.88868e-51	DS_vs_WT	Lrp1	1.58341e-52	TRUE	Interneuron_3	6.32218	8.18648	Cortex
2.77508e-29	0.278758	0.392	0.311	1.39032e-26	DS_vs_WT	Vars	2.69579e-28	TRUE	Interneuron_3	1.41459	1.92926	Cortex
4.46361e-39	0.265733	0.225	0.145	2.23627e-36	DS_vs_WT	Igfbp2	5.69111e-38	TRUE	Interneuron_3	0.578489	0.897733	Cortex
7.47592e-15	0.264706	0.198	0.156	3.74544e-12	DS_vs_WT	Mdga1	3.31541e-14	TRUE	Interneuron_3	0.754069	1.10732	Cortex
8.21687e-20	0.259428	0.532	0.463	4.11665e-17	DS_vs_WT	Satb2	4.53038e-19	TRUE	Interneuron_3	5.4101	6.67292	Cortex
4.54677e-23	0.245568	0.259	0.194	2.27793e-20	DS_vs_WT	Dyrk1a	3.19842e-22	TRUE	Interneuron_3	0.806571	1.1418	Cortex
2.35855e-47	0.239466	0.099	0.042	1.18163e-44	DS_vs_WT	Col1a2	4.37404e-46	TRUE	Interneuron_3	0.137533	0.342922	Cortex
5.23324e-22	0.231329	0.266	0.202	2.62185e-19	DS_vs_WT	Grin1	3.44381e-21	TRUE	Interneuron_3	0.811642	1.12672	Cortex
4.12531e-26	0.223883	0.221	0.155	2.06678e-23	DS_vs_WT	Vars2	3.36626e-25	TRUE	Interneuron_3	0.554974	0.816012	Cortex
2.37757e-21	0.214113	0.687	0.645	1.19116e-18	DS_vs_WT	Nlgn2	1.42654e-20	TRUE	Interneuron_3	5.3467	6.36211	Cortex
6.76044e-24	0.205618	0.139	0.089	3.38698e-21	DS_vs_WT	Ldlr	4.92546e-23	TRUE	Interneuron_3	0.304635	0.504479	Cortex
7.15026e-18	0.191108	0.315	0.252	3.58228e-15	DS_vs_WT	Rcan1	3.47298e-17	TRUE	Interneuron_3	1.16657	1.47345	Cortex
2.79679e-14	0.188775	0.28	0.228	1.40119e-11	DS_vs_WT	Ikbkb	1.16438e-13	TRUE	Interneuron_3	0.890595	1.15489	Cortex
2.1643e-15	0.172692	0.276	0.221	1.08432e-12	DS_vs_WT	Grip1	9.81151e-15	TRUE	Interneuron_3	0.926419	1.17138	Cortex
1.02134e-09	0.167785	0.209	0.172	5.11692e-07	DS_vs_WT	Myc	2.93456e-09	TRUE	Interneuron_3	0.7226	0.935053	Cortex
9.11996e-20	0.163487	0.854	0.803	4.5691e-17	DS_vs_WT	Tubb3	4.89598e-19	TRUE	Interneuron_3	19.0612	21.4683	Cortex
4.3173e-21	0.160074	0.104	0.063	2.16297e-18	DS_vs_WT	Lrp5	2.44647e-20	TRUE	Interneuron_3	0.213955	0.356406	Cortex
2.7148e-07	0.148007	0.375	0.357	0.000136011	DS_vs_WT	Gabbr1	6.27225e-07	TRUE	Interneuron_3	1.85706	2.16573	Cortex
6.49581e-12	0.131829	0.132	0.097	3.2544e-09	DS_vs_WT	Ifnar1	2.24601e-11	TRUE	Interneuron_3	0.332711	0.460227	Cortex
1.26357e-13	0.130906	0.126	0.089	6.33051e-11	DS_vs_WT	Ikbkg	5.15538e-13	TRUE	Interneuron_3	0.298387	0.42171	Cortex
5.31811e-08	0.125215	0.412	0.369	2.66437e-05	DS_vs_WT	Rbfox3	1.3071e-07	TRUE	Interneuron_3	1.90548	2.16892	Cortex
8.66928e-09	0.116375	0.099	0.073	4.34331e-06	DS_vs_WT	Trp53	2.2968e-08	TRUE	Interneuron_3	0.24476	0.349329	Cortex
5.10898e-06	0.113673	0.484	0.448	0.0025596	DS_vs_WT	Mtor	1.04223e-05	TRUE	Interneuron_3	2.55916	2.85094	Cortex
4.0401e-08	0.112266	0.494	0.449	2.02409e-05	DS_vs_WT	Lmnb1	1.01751e-07	TRUE	Interneuron_3	2.67003	2.96703	Cortex
1.24018e-12	0.109337	0.142	0.105	6.21332e-10	DS_vs_WT	Qars	4.77353e-12	TRUE	Interneuron_3	0.387053	0.496259	Cortex
3.2418e-08	0.108741	0.685	0.643	1.62414e-05	DS_vs_WT	Lhx6	8.26659e-08	TRUE	Interneuron_3	6.56978	7.16239	Cortex
0.00021035	0.10857	0.194	0.172	0.105386	DS_vs_WT	Csf2ra	0.000379748	TRUE	Interneuron_3	0.626299	0.753409	Cortex
6.94584e-10	0.1068	0.291	0.247	3.47987e-07	DS_vs_WT	Pink1	2.02422e-09	TRUE	Interneuron_3	1.05305	1.21079	Cortex
1.77994e-07	0.104012	0.126	0.099	8.9175e-05	DS_vs_WT	Dkk3	4.27186e-07	TRUE	Interneuron_3	0.423292	0.529694	Cortex
3.61171e-06	0.103132	0.206	0.175	0.00180947	DS_vs_WT	Tle1	7.44232e-06	TRUE	Interneuron_3	0.722198	0.849819	Cortex
2.35496e-14	0.100478	0.08	0.05	1.17983e-11	DS_vs_WT	Tapbp	1.00086e-13	TRUE	Interneuron_3	0.17185	0.256375	Cortex
1.00909e-06	0.0991136	0.114	0.09	0.000505552	DS_vs_WT	Ggt7	2.16688e-06	FALSE	Interneuron_3	0.293806	0.385816	Cortex
1.37163e-08	0.0980187	0.067	0.047	6.87185e-06	DS_vs_WT	Irf3	3.54192e-08	FALSE	Interneuron_3	0.129039	0.208413	Cortex
3.16714e-21	0.0960269	0.06	0.03	1.58674e-18	DS_vs_WT	Alkbh5	1.84599e-20	FALSE	Interneuron_3	0.103782	0.179751	Cortex
2.50266e-07	0.0949239	0.439	0.396	0.000125383	DS_vs_WT	Aars	5.86831e-07	FALSE	Interneuron_3	2.17133	2.38701	Cortex
3.52553e-11	0.0935398	0.057	0.034	1.76629e-08	DS_vs_WT	Aif1	1.10647e-10	FALSE	Interneuron_3	0.105698	0.179763	Cortex
0.000106976	0.0930715	0.102	0.083	0.0535951	DS_vs_WT	Wnt7b	0.000198392	FALSE	Interneuron_3	0.310283	0.397598	Cortex
6.20627e-11	0.0917592	0.098	0.07	3.10934e-08	DS_vs_WT	Fbln1	1.9183e-10	FALSE	Interneuron_3	0.248866	0.330877	Cortex
2.56195e-11	0.0912534	0.05	0.029	1.28354e-08	DS_vs_WT	Fzd8	8.1662e-11	FALSE	Interneuron_3	0.0881509	0.159202	Cortex
1.02923e-12	0.0911405	0.054	0.031	5.15643e-10	DS_vs_WT	Kif7	4.03774e-12	FALSE	Interneuron_3	0.0923234	0.163556	Cortex
2.36241e-07	0.0887876	0.187	0.155	0.000118357	DS_vs_WT	Gria4	5.60385e-07	FALSE	Interneuron_3	0.594658	0.69588	Cortex
1.18531e-05	0.0886724	0.085	0.066	0.00593842	DS_vs_WT	Tyk2	2.28117e-05	FALSE	Interneuron_3	0.19486	0.270604	Cortex
4.71301e-12	0.0875442	0.062	0.039	2.36122e-09	DS_vs_WT	Cldn5	1.68676e-11	FALSE	Interneuron_3	0.163277	0.236051	Cortex
1.39218e-07	0.0842655	0.054	0.036	6.97483e-05	DS_vs_WT	Acads	3.38101e-07	FALSE	Interneuron_3	0.109794	0.176546	Cortex
3.57812e-07	0.0821087	0.144	0.116	0.000179264	DS_vs_WT	Gsto1	8.11041e-07	FALSE	Interneuron_3	0.430835	0.514631	Cortex
9.70463e-07	0.0818745	0.074	0.054	0.000486202	DS_vs_WT	Sirt3	2.12876e-06	FALSE	Interneuron_3	0.191184	0.26074	Cortex
3.40071e-10	0.0808689	0.051	0.031	1.70376e-07	DS_vs_WT	Ifnar2	1.00543e-09	FALSE	Interneuron_3	0.0935955	0.156647	Cortex
0.00129622	0.0805731	0.782	0.764	0.649407	DS_vs_WT	Gria1	0.00209865	FALSE	Interneuron_3	13.6969	14.5411	Cortex
3.73068e-05	0.0759875	0.286	0.255	0.0186907	DS_vs_WT	Smurf1	6.98218e-05	FALSE	Interneuron_3	1.09013	1.20316	Cortex
0.00248949	0.0747549	0.285	0.261	1	DS_vs_WT	Tle3	0.00387676	FALSE	Interneuron_3	1.21002	1.32755	Cortex
0.00892953	0.0733992	0.181	0.163	1	DS_vs_WT	Thbs1	0.0128283	FALSE	Interneuron_3	0.807299	0.901627	Cortex
0.000334418	0.068907	0.182	0.159	0.167543	DS_vs_WT	Prdx5	0.000583088	FALSE	Interneuron_3	0.617179	0.696295	Cortex
5.26423e-08	0.0668711	0.096	0.073	2.63738e-05	DS_vs_WT	Nr4a2	1.3071e-07	FALSE	Interneuron_3	0.524507	0.596833	Cortex
2.48193e-06	0.0638891	0.055	0.039	0.00124345	DS_vs_WT	Sod1	5.16646e-06	FALSE	Interneuron_3	0.125254	0.176205	Cortex
7.60755e-07	0.0629249	0.053	0.036	0.000381138	DS_vs_WT	Psmb5	1.68689e-06	FALSE	Interneuron_3	0.129207	0.179549	Cortex
0.00204274	0.0600929	0.156	0.136	1	DS_vs_WT	Gpx1	0.00323038	FALSE	Interneuron_3	0.51883	0.58343	Cortex
0.000575809	0.0545817	0.094	0.078	0.288481	DS_vs_WT	Tnc	0.000987102	FALSE	Interneuron_3	0.327665	0.378857	Cortex
0.0345365	0.049457	0.13	0.117	1	DS_vs_WT	Ascl1	0.0457496	FALSE	Interneuron_3	0.471497	0.522816	Cortex
1.06073e-06	0.0488857	0.092	0.071	0.000531427	DS_vs_WT	Cd68	2.25406e-06	FALSE	Interneuron_3	0.263788	0.307346	Cortex
0.0502063	0.0486518	0.123	0.111	1	DS_vs_WT	Vegfa	0.0636155	FALSE	Interneuron_3	0.393601	0.441398	Cortex
0.0291588	0.0485765	0.1	0.088	1	DS_vs_WT	Glb1	0.0392891	FALSE	Interneuron_3	0.30332	0.347951	Cortex
0.0813614	0.0451276	0.108	0.097	1	DS_vs_WT	Atrip	0.098796	FALSE	Interneuron_3	0.326369	0.368513	Cortex
0.000642591	0.0446235	0.18	0.159	0.321938	DS_vs_WT	Hsf1	0.00108338	FALSE	Interneuron_3	0.577032	0.626573	Cortex
0.00747707	0.0429758	0.05	0.04	1	DS_vs_WT	Mavs	0.0108952	FALSE	Interneuron_3	0.135732	0.170073	Cortex
0.0109146	0.0414414	0.094	0.081	1	DS_vs_WT	Nrf1	0.0153557	FALSE	Interneuron_3	0.271454	0.308506	Cortex
0.0657852	0.0414361	0.06	0.052	1	DS_vs_WT	Fuca1	0.0813344	FALSE	Interneuron_3	0.162883	0.196767	Cortex
1.00422e-08	0.0404301	0.869	0.835	5.03112e-06	DS_vs_WT	Mapt	2.62641e-08	FALSE	Interneuron_3	18.033	18.574	Cortex
0.0519375	0.0402806	0.284	0.268	1	DS_vs_WT	Wnt7a	0.0651499	FALSE	Interneuron_3	1.2611	1.32512	Cortex
0.0976889	0.040127	0.204	0.19	1	DS_vs_WT	Cux1	0.116541	FALSE	Interneuron_3	0.822591	0.873996	Cortex
2.73642e-07	0.039663	0.056	0.039	0.000137095	DS_vs_WT	Notch2	6.27225e-07	FALSE	Interneuron_3	0.139202	0.170956	Cortex
0.160672	0.0356153	0.08	0.072	1	DS_vs_WT	Mdm2	0.182094	FALSE	Interneuron_3	0.243886	0.274975	Cortex
0.288446	0.0330092	0.078	0.072	1	DS_vs_WT	Ptch1	0.314668	FALSE	Interneuron_3	0.243382	0.272159	Cortex
0.0290046	0.0287786	0.067	0.058	1	DS_vs_WT	Ccl8	0.0392891	FALSE	Interneuron_3	0.211653	0.236066	Cortex
1.40682e-05	0.0281709	0.066	0.051	0.00704816	DS_vs_WT	Pdgfra	2.68216e-05	FALSE	Interneuron_3	0.189607	0.213064	Cortex
0.41464	0.0280714	0.405	0.395	1	DS_vs_WT	Ep300	0.447548	FALSE	Interneuron_3	2.09406	2.15485	Cortex
0.00126461	0.0277542	0.416	0.391	0.633571	DS_vs_WT	Txnrd1	0.00206385	FALSE	Interneuron_3	2.22645	2.28912	Cortex
0.000226528	0.0261114	0.129	0.111	0.113491	DS_vs_WT	Mx1	0.000405366	FALSE	Interneuron_3	0.441925	0.46826	Cortex
0.00199258	0.0242033	0.246	0.226	0.998285	DS_vs_WT	Cx3cl1	0.00317568	FALSE	Interneuron_3	1.12737	1.16336	Cortex
0.0486066	0.0220645	0.051	0.043	1	DS_vs_WT	Irf9	0.0619734	FALSE	Interneuron_3	0.14383	0.161458	Cortex
0.0250876	0.0204538	0.206	0.192	1	DS_vs_WT	Traf3	0.0343481	FALSE	Interneuron_3	0.758346	0.783452	Cortex
0.000297865	0.0204518	0.081	0.067	0.14923	DS_vs_WT	H2afx	0.000524027	FALSE	Interneuron_3	0.232946	0.250549	Cortex
0.146825	0.019788	0.144	0.134	1	DS_vs_WT	Nfkb1	0.167331	FALSE	Interneuron_3	0.506488	0.527294	Cortex
0.113503	0.0167735	0.228	0.216	1	DS_vs_WT	Hras	0.132826	FALSE	Interneuron_3	0.888068	0.910147	Cortex
0.621977	0.0157548	0.064	0.064	1	DS_vs_WT	Txnrd3	0.666552	FALSE	Interneuron_3	0.203492	0.216707	Cortex
0.000121565	0.0151911	0.329	0.304	0.0609038	DS_vs_WT	Gad2	0.000223416	FALSE	Interneuron_3	1.5832	1.61054	Cortex
0.00237005	0.0107837	0.191	0.205	1	DS_vs_WT	Anxa6	0.00371915	FALSE	Interneuron_3	0.847062	0.86092	Cortex
0.858929	0.0102207	0.096	0.094	1	DS_vs_WT	Tbk1	0.876107	FALSE	Interneuron_3	0.329971	0.339427	Cortex
0.255422	0.00993225	0.088	0.082	1	DS_vs_WT	Sorl1	0.28014	FALSE	Interneuron_3	0.308769	0.31781	Cortex
0.191959	0.00974263	0.377	0.365	1	DS_vs_WT	Pld3	0.213987	FALSE	Interneuron_3	2.12606	2.14724	Cortex
0.0235964	0.00909576	0.068	0.06	1	DS_vs_WT	Fbln2	0.0325248	FALSE	Interneuron_3	0.281665	0.289771	Cortex
0.131045	0.00863479	0.228	0.217	1	DS_vs_WT	Psen1	0.151035	FALSE	Interneuron_3	0.90672	0.918166	Cortex
0.624075	0.00781195	0.05	0.047	1	DS_vs_WT	Sufu	0.666552	FALSE	Interneuron_3	0.154495	0.160763	Cortex
0.120525	0.00720333	0.05	0.044	1	DS_vs_WT	Myd88	0.1397	FALSE	Interneuron_3	0.149233	0.154986	Cortex
0.0367345	0.00671806	0.124	0.114	1	DS_vs_WT	Optn	0.0483473	FALSE	Interneuron_3	0.422542	0.429182	Cortex
0.0778189	0.00409	0.088	0.081	1	DS_vs_WT	S100a10	0.0950602	FALSE	Interneuron_3	0.30703	0.310741	Cortex
0.629342	0.00152872	0.052	0.054	1	DS_vs_WT	Dgat1	0.668676	FALSE	Interneuron_3	0.171465	0.172707	Cortex
0.997468	0.000628785	0.153	0.153	1	DS_vs_WT	Otud4	1	FALSE	Interneuron_3	0.578452	0.57914	Cortex
1	0	1	1	1	DS_vs_WT	Unnamed: 0	1	FALSE	Interneuron_3	9.77778e-178	1.15588e-178	Cortex
0.113944	-0.00101417	0.121	0.114	1	DS_vs_WT	Smpd1	0.132826	FALSE	Interneuron_3	0.425742	0.42474	Cortex
0.00392377	-0.00124862	0.387	0.369	1	DS_vs_WT	Dtx4	0.00601841	FALSE	Interneuron_3	2.1541	2.15137	Cortex
0.091988	-0.00228909	0.096	0.089	1	DS_vs_WT	Cxcr4	0.111039	FALSE	Interneuron_3	0.355404	0.353255	Cortex
0.675971	-0.00347142	0.058	0.06	1	DS_vs_WT	Axin1	0.707169	FALSE	Interneuron_3	0.193014	0.190146	Cortex
0.0430353	-0.00720011	0.052	0.047	1	DS_vs_WT	Bcan	0.0559185	FALSE	Interneuron_3	0.179939	0.174065	Cortex
0.924457	-0.00735697	0.051	0.051	1	DS_vs_WT	Otx1	0.93361	FALSE	Interneuron_3	0.191954	0.185891	Cortex
0.00620523	-0.00767417	0.06	0.053	1	DS_vs_WT	Psmb10	0.00937679	FALSE	Interneuron_3	0.187383	0.181084	Cortex
0.891326	-0.0105764	0.088	0.089	1	DS_vs_WT	Aldh2	0.904629	FALSE	Interneuron_3	0.302616	0.293102	Cortex
0.108305	-0.0112496	0.068	0.064	1	DS_vs_WT	Sall1	0.128455	FALSE	Interneuron_3	0.259476	0.249693	Cortex
0.170783	-0.0124585	0.152	0.147	1	DS_vs_WT	Psmb2	0.192485	FALSE	Interneuron_3	0.583575	0.569959	Cortex
0.641284	-0.0148798	0.116	0.115	1	DS_vs_WT	Rnf5	0.677834	FALSE	Interneuron_3	0.41509	0.40057	Cortex
0.00666662	-0.01629	0.548	0.53	1	DS_vs_WT	Gad1	0.00992694	FALSE	Interneuron_3	4.5579	4.4955	Cortex
0.14556	-0.0171776	0.189	0.183	1	DS_vs_WT	Psme1	0.166822	FALSE	Interneuron_3	0.730851	0.710364	Cortex
0.0184012	-0.0174625	0.07	0.08	1	DS_vs_WT	Rars	0.0255364	FALSE	Interneuron_3	0.263415	0.248214	Cortex
0.0688141	-0.0175548	0.134	0.128	1	DS_vs_WT	Clu	0.0845667	FALSE	Interneuron_3	0.525161	0.506716	Cortex
0.650777	-0.0186748	0.117	0.118	1	DS_vs_WT	Ythdf1	0.684323	FALSE	Interneuron_3	0.437656	0.419167	Cortex
0.709949	-0.0193401	0.086	0.087	1	DS_vs_WT	Sirt5	0.738926	FALSE	Interneuron_3	0.31433	0.296828	Cortex
0.772187	-0.0199286	0.16	0.162	1	DS_vs_WT	Hif1a	0.799625	FALSE	Interneuron_3	0.646293	0.623708	Cortex
0.781037	-0.0202356	0.394	0.393	1	DS_vs_WT	Cnr1	0.804704	FALSE	Interneuron_3	3.32242	3.26221	Cortex
0.794227	-0.0204317	0.122	0.125	1	DS_vs_WT	Slc17a7	0.814183	FALSE	Interneuron_3	0.55923	0.537304	Cortex
0.00659228	-0.0238983	0.295	0.284	1	DS_vs_WT	Bcl2l2	0.00988843	FALSE	Interneuron_3	1.25909	1.22197	Cortex
0.33374	-0.0239313	0.119	0.119	1	DS_vs_WT	Npc1	0.362143	FALSE	Interneuron_3	0.440588	0.416889	Cortex
0.00707736	-0.0241879	0.357	0.345	1	DS_vs_WT	Ctnnb1	0.0104622	FALSE	Interneuron_3	2.0067	1.95671	Cortex
0.10952	-0.0268988	0.121	0.118	1	DS_vs_WT	Axin2	0.129145	FALSE	Interneuron_3	0.430857	0.404426	Cortex
0.176696	-0.030342	0.154	0.153	1	DS_vs_WT	Plk3	0.198054	FALSE	Interneuron_3	0.581313	0.548403	Cortex
0.0448445	-0.0378906	0.044	0.052	1	DS_vs_WT	Rfx5	0.0579004	FALSE	Interneuron_3	0.159082	0.129037	Cortex
0.245754	-0.0387214	0.119	0.128	1	DS_vs_WT	Sp1	0.270993	FALSE	Interneuron_3	0.459402	0.420753	Cortex
0.194087	-0.0390512	0.072	0.079	1	DS_vs_WT	Sox5	0.215184	FALSE	Interneuron_3	0.296918	0.262284	Cortex
0.0520561	-0.0396992	0.053	0.061	1	DS_vs_WT	Sirt1	0.0651499	FALSE	Interneuron_3	0.205794	0.173066	Cortex
0.0925506	-0.0424485	0.058	0.066	1	DS_vs_WT	Pex1	0.111061	FALSE	Interneuron_3	0.236949	0.201084	Cortex
0.0423164	-0.0458203	0.164	0.179	1	DS_vs_WT	Tle4	0.0553368	FALSE	Interneuron_3	0.954134	0.893046	Cortex
0.00912654	-0.0475013	0.046	0.056	1	DS_vs_WT	Smurf2	0.0129293	FALSE	Interneuron_3	0.176798	0.138682	Cortex
0.00520699	-0.0489641	0.046	0.057	1	DS_vs_WT	Traf6	0.00792706	FALSE	Interneuron_3	0.185085	0.145539	Cortex
0.00902715	-0.0518003	0.054	0.065	1	DS_vs_WT	Prkaa1	0.0128779	FALSE	Interneuron_3	0.234692	0.191146	Cortex
0.0482189	-0.0538323	0.064	0.07	1	DS_vs_WT	Foxo1	0.0618658	FALSE	Interneuron_3	0.25309	0.207194	Cortex
0.0292742	-0.0565688	0.08	0.085	1	DS_vs_WT	Cxcl13	0.0392891	FALSE	Interneuron_3	0.302876	0.252778	Cortex
0.000585054	-0.0583943	0.091	0.109	0.293112	DS_vs_WT	Atf6	0.000994592	FALSE	Interneuron_3	0.382339	0.327505	Cortex
0.0625528	-0.0591825	0.225	0.24	1	DS_vs_WT	Mecp2	0.0778096	FALSE	Interneuron_3	1.00341	0.922893	Cortex
0.0309653	-0.06804	0.085	0.092	1	DS_vs_WT	Cdkn1a	0.0412871	FALSE	Interneuron_3	0.378746	0.315231	Cortex
1.01609e-05	-0.0698156	0.075	0.096	0.00509059	DS_vs_WT	Rad50	1.99309e-05	FALSE	Interneuron_3	0.327214	0.264516	Cortex
0.00101728	-0.0700739	0.055	0.067	0.509659	DS_vs_WT	Aldh9a1	0.0016872	FALSE	Interneuron_3	0.220856	0.162974	Cortex
2.17642e-11	-0.0711576	0.038	0.06	1.09039e-08	DS_vs_WT	Ifit2	7.04746e-11	FALSE	Interneuron_3	0.209838	0.151613	Cortex
0.00081246	-0.0730903	0.128	0.148	0.407042	DS_vs_WT	Cpt1c	0.00135854	FALSE	Interneuron_3	0.523001	0.447764	Cortex
0.00102688	-0.0776894	0.239	0.265	0.514468	DS_vs_WT	Mapk14	0.00168939	FALSE	Interneuron_3	1.11755	1.00653	Cortex
5.88952e-06	-0.0796807	0.037	0.052	0.00295065	DS_vs_WT	Cck	1.18957e-05	FALSE	Interneuron_3	0.182655	0.119107	Cortex
0.00777013	-0.0886393	0.199	0.215	1	DS_vs_WT	Lrp6	0.0112419	FALSE	Interneuron_3	0.900023	0.786799	Cortex
0.000543991	-0.0900339	0.099	0.117	0.27254	DS_vs_WT	Mettl3	0.000940459	FALSE	Interneuron_3	0.431948	0.345316	Cortex
7.96413e-06	-0.0952888	0.095	0.118	0.00399003	DS_vs_WT	Gba	1.57736e-05	FALSE	Interneuron_3	0.423958	0.332946	Cortex
1.75596e-09	-0.104705	0.062	0.088	8.79734e-07	DS_vs_WT	Cr1l	4.90706e-09	TRUE	Interneuron_3	0.296183	0.205444	Cortex
4.9523e-12	-0.104855	0.05	0.078	2.4811e-09	DS_vs_WT	Zhx2	1.74184e-11	TRUE	Interneuron_3	0.276961	0.187445	Cortex
4.52816e-09	-0.105412	0.058	0.083	2.26861e-06	DS_vs_WT	Fgfr2	1.21545e-08	TRUE	Interneuron_3	0.318708	0.225791	Cortex
0.00167297	-0.106213	0.36	0.379	0.838156	DS_vs_WT	Syn1	0.00268729	TRUE	Interneuron_3	2.23369	2.00418	Cortex
9.27683e-12	-0.11187	0.04	0.065	4.64769e-09	DS_vs_WT	Wtap	3.10241e-11	TRUE	Interneuron_3	0.219652	0.128652	Cortex
0.00733009	-0.112235	0.092	0.1	1	DS_vs_WT	Reln	0.0107578	TRUE	Interneuron_3	0.5469	0.43112	Cortex
4.82008e-07	-0.113284	0.129	0.159	0.000241486	DS_vs_WT	Crebbp	1.08054e-06	TRUE	Interneuron_3	0.595044	0.474588	Cortex
0.000297976	-0.114535	0.304	0.328	0.149286	DS_vs_WT	Dlg4	0.000524027	TRUE	Interneuron_3	1.56648	1.37061	Cortex
2.78558e-05	-0.115195	0.226	0.255	0.0139557	DS_vs_WT	Sars	5.26165e-05	TRUE	Interneuron_3	1.11192	0.949847	Cortex
9.94979e-07	-0.116483	0.088	0.113	0.000498484	DS_vs_WT	Nlgn1	2.15932e-06	TRUE	Interneuron_3	0.451958	0.339335	Cortex
1.16817e-05	-0.118513	0.302	0.309	0.00585252	DS_vs_WT	Gsk3b	2.26958e-05	TRUE	Interneuron_3	1.5035	1.30606	Cortex
1.52781e-12	-0.119442	0.061	0.092	7.65431e-10	DS_vs_WT	Braf	5.77171e-12	TRUE	Interneuron_3	0.328156	0.222625	Cortex
0.000138037	-0.121208	0.108	0.121	0.0691568	DS_vs_WT	Aldh1l1	0.000251425	TRUE	Interneuron_3	0.524043	0.401231	Cortex
0.0171483	-0.123315	0.408	0.424	1	DS_vs_WT	Sst	0.0239606	TRUE	Interneuron_3	8.3768	7.60861	Cortex
7.62959e-06	-0.124028	0.482	0.498	0.00382242	DS_vs_WT	Eif4g1	1.52592e-05	TRUE	Interneuron_3	3.33582	2.97865	Cortex
1.82377e-11	-0.124863	0.038	0.062	9.1371e-09	DS_vs_WT	Unc5d	6.0008e-11	TRUE	Interneuron_3	0.231578	0.12947	Cortex
4.32406e-09	-0.125264	0.055	0.078	2.16635e-06	DS_vs_WT	Rgs8	1.17614e-08	TRUE	Interneuron_3	0.30993	0.200992	Cortex
2.82504e-10	-0.125623	0.109	0.143	1.41534e-07	DS_vs_WT	Itch	8.47512e-10	TRUE	Interneuron_3	0.526333	0.39905	Cortex
1.39164e-09	-0.127915	0.065	0.092	6.97211e-07	DS_vs_WT	Sod2	3.94298e-09	TRUE	Interneuron_3	0.33855	0.224979	Cortex
2.9372e-12	-0.128274	0.053	0.082	1.47154e-09	DS_vs_WT	Trp53bp1	1.06998e-11	TRUE	Interneuron_3	0.284693	0.175399	Cortex
6.79174e-12	-0.140225	0.1	0.136	3.40266e-09	DS_vs_WT	Wars	2.30919e-11	TRUE	Interneuron_3	0.503269	0.364032	Cortex
2.02999e-13	-0.145155	0.085	0.121	1.01703e-10	DS_vs_WT	Casp3	8.11997e-13	TRUE	Interneuron_3	0.435593	0.298181	Cortex
1.26167e-21	-0.146813	0.026	0.056	6.32096e-19	DS_vs_WT	Creb1	7.79941e-21	TRUE	Interneuron_3	0.196723	0.0809317	Cortex
1.95609e-06	-0.155583	0.348	0.372	0.000980002	DS_vs_WT	Grin2b	4.11384e-06	TRUE	Interneuron_3	2.30408	1.9663	Cortex
2.51293e-12	-0.160215	0.212	0.26	1.25898e-09	DS_vs_WT	Ythdc1	9.32069e-12	TRUE	Interneuron_3	1.08154	0.86275	Cortex
0.00282748	-0.163501	0.127	0.132	1	DS_vs_WT	Nos1	0.00436974	TRUE	Interneuron_3	0.849648	0.651469	Cortex
9.31424e-22	-0.164671	0.112	0.164	4.66643e-19	DS_vs_WT	Pdia3	5.93783e-21	TRUE	Interneuron_3	0.663987	0.484496	Cortex
8.8158e-32	-0.16566	0.023	0.06	4.41672e-29	DS_vs_WT	Ogt	8.99212e-31	TRUE	Interneuron_3	0.198053	0.0680891	Cortex
1.62984e-10	-0.171355	0.185	0.226	8.1655e-08	DS_vs_WT	Arf1	4.9625e-10	TRUE	Interneuron_3	1.01176	0.786459	Cortex
7.66066e-19	-0.172129	0.11	0.159	3.83799e-16	DS_vs_WT	Jak2	3.81165e-18	TRUE	Interneuron_3	0.626633	0.443689	Cortex
2.61906e-17	-0.183684	0.054	0.088	1.31215e-14	DS_vs_WT	Gabra1	1.24253e-16	TRUE	Interneuron_3	0.35301	0.19126	Cortex
6.58022e-19	-0.185938	0.073	0.115	3.29669e-16	DS_vs_WT	Vcan	3.35591e-18	TRUE	Interneuron_3	0.469533	0.291833	Cortex
5.38092e-24	-0.18917	0.055	0.098	2.69584e-21	DS_vs_WT	Csnk1a1	4.06558e-23	TRUE	Interneuron_3	0.366594	0.198653	Cortex
1.53941e-14	-0.213096	0.221	0.273	7.71243e-12	DS_vs_WT	Jak1	6.68168e-14	TRUE	Interneuron_3	1.37707	1.05066	Cortex
1.98254e-16	-0.223126	0.255	0.313	9.93252e-14	DS_vs_WT	Lamp1	9.19177e-16	TRUE	Interneuron_3	1.66095	1.27965	Cortex
1.21078e-28	-0.22816	0.097	0.156	6.06599e-26	DS_vs_WT	Mapk1	1.10998e-27	TRUE	Interneuron_3	0.61076	0.375144	Cortex
1.066e-19	-0.234907	0.364	0.435	5.34066e-17	DS_vs_WT	Cux2	5.576e-19	TRUE	Interneuron_3	3.74471	3.03177	Cortex
1.09214e-22	-0.24121	0.13	0.188	5.4716e-20	DS_vs_WT	Mef2c	7.42653e-22	TRUE	Interneuron_3	0.906459	0.612932	Cortex
1.13259e-26	-0.256542	0.069	0.119	5.67427e-24	DS_vs_WT	Cntn6	9.62701e-26	TRUE	Interneuron_3	0.588009	0.32931	Cortex
8.39647e-25	-0.267264	0.184	0.249	4.20663e-22	DS_vs_WT	Fto	6.588e-24	TRUE	Interneuron_3	1.09622	0.74174	Cortex
1.25145e-28	-0.286201	0.132	0.197	6.26975e-26	DS_vs_WT	Rac1	1.10998e-27	TRUE	Interneuron_3	0.890528	0.550343	Cortex
1.37845e-37	-0.289597	0.061	0.118	6.90602e-35	DS_vs_WT	Ptprd	1.48002e-36	TRUE	Interneuron_3	0.486817	0.21641	Cortex
3.40104e-39	-0.292534	0.086	0.152	1.70392e-36	DS_vs_WT	Nras	4.62542e-38	TRUE	Interneuron_3	0.610198	0.314673	Cortex
4.03654e-09	-0.297254	0.16	0.191	2.02231e-06	DS_vs_WT	Npy	1.11278e-08	TRUE	Interneuron_3	1.51616	1.04765	Cortex
1.44501e-38	-0.32614	0.534	0.573	7.23948e-36	DS_vs_WT	Apc	1.63767e-37	TRUE	Interneuron_3	4.85717	3.67208	Cortex
1.98633e-39	-0.33342	0.121	0.196	9.95153e-37	DS_vs_WT	Tnr	2.89437e-38	TRUE	Interneuron_3	0.870235	0.484318	Cortex
6.26933e-42	-0.381925	0.126	0.202	3.14094e-39	DS_vs_WT	Cd47	1.06579e-40	TRUE	Interneuron_3	0.979057	0.518754	Cortex
1.97981e-39	-0.440895	0.21	0.285	9.91882e-37	DS_vs_WT	Dcx	2.89437e-38	TRUE	Interneuron_3	1.78883	1.05447	Cortex
7.12706e-65	-0.450056	0.254	0.376	3.57065e-62	DS_vs_WT	Hsp90b1	2.4232e-63	TRUE	Interneuron_3	2.27306	1.39593	Cortex
3.20908e-63	-0.495242	0.204	0.317	1.60775e-60	DS_vs_WT	Fabp7	9.35218e-62	TRUE	Interneuron_3	1.92423	1.07457	Cortex
3.6866e-121	-0.661402	0.092	0.222	1.84699e-118	DS_vs_WT	Map2	3.76033e-119	TRUE	Interneuron_3	1.18523	0.38164	Cortex
p_val	avg_log2FC	pct.1	pct.2	p_val_adj	comparison	gene	FDR	sig	celltype	exp.1	exp.2	Cortex
0	1.22955	0.583	0.257	0	DS_vs_WT	Col1a1	0	TRUE	Layer_2-3_ExN	0.766578	3.14252	Cortex
4.62685e-236	0.647257	0.835	0.64	2.31805e-233	DS_vs_WT	Dvl1	5.76043e-234	TRUE	Layer_2-3_ExN	2.5198	4.51266	Cortex
2.71458e-182	0.505972	0.951	0.916	1.36e-179	DS_vs_WT	Pou3f3	1.35186e-180	TRUE	Layer_2-3_ExN	7.27446	10.7504	Cortex
5.48172e-200	0.481633	0.986	0.947	2.74634e-197	DS_vs_WT	Ncan	3.41237e-198	TRUE	Layer_2-3_ExN	10.462	15.0046	Cortex
8.66e-128	0.453094	0.985	0.958	4.33866e-125	DS_vs_WT	App	3.5939e-126	TRUE	Layer_2-3_ExN	14.2918	19.934	Cortex
5.14039e-80	0.435201	0.564	0.397	2.57533e-77	DS_vs_WT	Myc	9.14254e-79	TRUE	Layer_2-3_ExN	1.4026	2.24855	Cortex
8.90625e-97	0.395714	0.773	0.612	4.46203e-94	DS_vs_WT	Vars	2.21766e-95	TRUE	Layer_2-3_ExN	2.33464	3.38703	Cortex
2.3488e-86	0.395042	0.449	0.275	1.17675e-83	DS_vs_WT	Vars2	5.31683e-85	TRUE	Layer_2-3_ExN	0.741324	1.28981	Cortex
3.97088e-86	0.391787	0.677	0.504	1.98941e-83	DS_vs_WT	Cdkn1c	8.23958e-85	TRUE	Layer_2-3_ExN	1.83674	2.72185	Cortex
3.56007e-116	0.376442	0.255	0.097	1.78359e-113	DS_vs_WT	Col1a2	1.26637e-114	TRUE	Layer_2-3_ExN	0.236502	0.605148	Cortex
2.9502e-115	0.35907	0.962	0.925	1.47805e-112	DS_vs_WT	Lrp1	9.18251e-114	TRUE	Layer_2-3_ExN	7.6384	10.0796	Cortex
7.39106e-98	0.346623	0.94	0.881	3.70292e-95	DS_vs_WT	Nlgn2	2.04486e-96	TRUE	Layer_2-3_ExN	5.88794	7.75857	Cortex
1.5828e-73	0.341462	0.623	0.456	7.92984e-71	DS_vs_WT	Igfbp2	2.46324e-72	TRUE	Layer_2-3_ExN	1.55781	2.24085	Cortex
8.48686e-50	0.320571	0.847	0.77	4.25192e-47	DS_vs_WT	Mdga1	8.45292e-49	TRUE	Layer_2-3_ExN	5.08017	6.59307	Cortex
1.90026e-53	0.313204	0.504	0.363	9.52031e-51	DS_vs_WT	Dyrk1a	2.15075e-52	TRUE	Layer_2-3_ExN	1.14837	1.66928	Cortex
6.33697e-39	0.295655	0.649	0.547	3.17482e-36	DS_vs_WT	Gabbr1	5.25968e-38	TRUE	Layer_2-3_ExN	2.13055	2.84256	Cortex
5.49174e-60	0.281355	0.375	0.235	2.75136e-57	DS_vs_WT	Ldlr	6.83722e-59	TRUE	Layer_2-3_ExN	0.631478	0.982795	Cortex
3.704e-41	0.260517	0.308	0.199	1.85571e-38	DS_vs_WT	Ifnar1	3.18033e-40	TRUE	Layer_2-3_ExN	0.498163	0.794661	Cortex
6.52211e-53	0.255595	0.196	0.096	3.26758e-50	DS_vs_WT	Fzd8	7.06089e-52	TRUE	Layer_2-3_ExN	0.228122	0.466167	Cortex
3.15757e-61	0.254979	0.3	0.171	1.58194e-58	DS_vs_WT	Lrp5	4.13807e-60	TRUE	Layer_2-3_ExN	0.438179	0.716206	Cortex
8.25305e-35	0.246215	0.556	0.443	4.13478e-32	DS_vs_WT	Rcan1	5.40792e-34	TRUE	Layer_2-3_ExN	1.40665	1.85451	Cortex
5.65143e-30	0.217415	0.435	0.331	2.83136e-27	DS_vs_WT	Grin1	3.19819e-29	TRUE	Layer_2-3_ExN	0.959761	1.27851	Cortex
9.66605e-37	0.216685	0.389	0.277	4.84269e-34	DS_vs_WT	Gsto1	7.07896e-36	TRUE	Layer_2-3_ExN	0.802127	1.09418	Cortex
3.41073e-36	0.205999	1	0.997	1.70878e-33	DS_vs_WT	Tubb3	2.42649e-35	TRUE	Layer_2-3_ExN	35.215	40.7734	Cortex
1.07109e-21	0.198921	0.757	0.692	5.36616e-19	DS_vs_WT	Tle3	4.30164e-21	TRUE	Layer_2-3_ExN	3.145	3.7578	Cortex
9.10595e-30	0.196749	0.31	0.217	4.56208e-27	DS_vs_WT	Qars	4.92909e-29	TRUE	Layer_2-3_ExN	0.548742	0.775033	Cortex
1.57837e-37	0.195427	0.159	0.082	7.90765e-35	DS_vs_WT	Dkk3	1.19095e-36	TRUE	Layer_2-3_ExN	0.201589	0.375896	Cortex
6.90575e-39	0.194748	0.235	0.141	3.45978e-36	DS_vs_WT	Ikbkg	5.54688e-38	TRUE	Layer_2-3_ExN	0.348711	0.543633	Cortex
1.7446e-50	0.18999	0.136	0.056	8.74043e-48	DS_vs_WT	Acads	1.81002e-49	TRUE	Layer_2-3_ExN	0.128819	0.287707	Cortex
2.63757e-47	0.179769	0.116	0.045	1.32142e-44	DS_vs_WT	Fn1	2.52598e-46	TRUE	Layer_2-3_ExN	0.11128	0.258749	Cortex
1.14841e-22	0.167921	0.408	0.319	5.75352e-20	DS_vs_WT	Vegfa	4.84667e-22	TRUE	Layer_2-3_ExN	0.926447	1.16424	Cortex
7.37776e-23	0.167485	0.262	0.185	3.69626e-20	DS_vs_WT	Trp53	3.16735e-22	TRUE	Layer_2-3_ExN	0.470693	0.651734	Cortex
6.79804e-35	0.161969	0.143	0.073	3.40582e-32	DS_vs_WT	Tapbp	4.5749e-34	TRUE	Layer_2-3_ExN	0.168375	0.307193	Cortex
3.0404e-34	0.160976	0.124	0.06	1.52324e-31	DS_vs_WT	Sod1	1.94118e-33	TRUE	Layer_2-3_ExN	0.139248	0.273728	Cortex
1.82405e-23	0.160448	0.377	0.289	9.13848e-21	DS_vs_WT	Prdx5	8.1105e-23	TRUE	Layer_2-3_ExN	0.806395	1.01889	Cortex
1.45899e-30	0.15904	0.852	0.768	7.30954e-28	DS_vs_WT	Lmnb1	8.64973e-30	TRUE	Layer_2-3_ExN	4.15151	4.75189	Cortex
1.8026e-32	0.158201	0.163	0.091	9.03101e-30	DS_vs_WT	Fbln1	1.09475e-31	TRUE	Layer_2-3_ExN	0.221546	0.363117	Cortex
7.13953e-20	0.150525	0.543	0.456	3.5769e-17	DS_vs_WT	Nos1	2.61433e-19	TRUE	Layer_2-3_ExN	1.60874	1.89563	Cortex
2.86795e-30	0.145505	0.127	0.065	1.43684e-27	DS_vs_WT	Ifnar2	1.66074e-29	TRUE	Layer_2-3_ExN	0.150113	0.272161	Cortex
1.34737e-32	0.144614	0.405	0.305	6.75032e-30	DS_vs_WT	Wnt7b	8.38737e-32	TRUE	Layer_2-3_ExN	1.12492	1.34896	Cortex
4.05798e-19	0.141155	0.54	0.455	2.03305e-16	DS_vs_WT	Ikbkb	1.40339e-18	TRUE	Layer_2-3_ExN	1.43541	1.68574	Cortex
3.84847e-19	0.137322	0.782	0.708	1.92808e-16	DS_vs_WT	Rbfox3	1.34968e-18	TRUE	Layer_2-3_ExN	4.0349	4.53769	Cortex
5.75011e-27	0.136283	0.565	0.466	2.8808e-24	DS_vs_WT	Pld3	2.86355e-26	TRUE	Layer_2-3_ExN	1.57957	1.83513	Cortex
2.27642e-29	0.135624	0.111	0.054	1.14049e-26	DS_vs_WT	Alkbh5	1.20602e-28	TRUE	Layer_2-3_ExN	0.124848	0.235722	Cortex
5.15821e-21	0.132793	0.272	0.199	2.58426e-18	DS_vs_WT	Grip1	2.00687e-20	TRUE	Layer_2-3_ExN	0.515898	0.662052	Cortex
1.09717e-26	0.132583	0.118	0.062	5.49682e-24	DS_vs_WT	Kif7	5.35677e-26	TRUE	Layer_2-3_ExN	0.135936	0.245275	Cortex
9.56411e-16	0.128712	0.672	0.598	4.79162e-13	DS_vs_WT	Aars	2.92454e-15	TRUE	Layer_2-3_ExN	2.3677	2.68197	Cortex
1.41579e-26	0.126039	0.475	0.38	7.0931e-24	DS_vs_WT	Pink1	6.77945e-26	TRUE	Layer_2-3_ExN	1.15012	1.34641	Cortex
4.38048e-20	0.12536	0.362	0.284	2.19462e-17	DS_vs_WT	Traf3	1.62797e-19	TRUE	Layer_2-3_ExN	0.770554	0.931285	Cortex
2.06667e-14	0.123485	0.309	0.245	1.0354e-11	DS_vs_WT	Csf2ra	5.84774e-14	TRUE	Layer_2-3_ExN	0.636854	0.783129	Cortex
4.54492e-24	0.122675	0.118	0.065	2.27701e-21	DS_vs_WT	Aif1	2.05761e-23	TRUE	Layer_2-3_ExN	0.146515	0.248271	Cortex
6.45081e-29	0.12106	0.109	0.054	3.23186e-26	DS_vs_WT	Osmr	3.34636e-28	TRUE	Layer_2-3_ExN	0.123452	0.221792	Cortex
1.42109e-14	0.117532	0.187	0.133	7.11968e-12	DS_vs_WT	Tyk2	4.06727e-14	TRUE	Layer_2-3_ExN	0.312151	0.423522	Cortex
2.63779e-18	0.111062	0.405	0.328	1.32153e-15	DS_vs_WT	Hsf1	8.99739e-18	TRUE	Layer_2-3_ExN	0.950293	1.10636	Cortex
9.631e-16	0.109287	0.998	0.992	4.82513e-13	DS_vs_WT	Mapt	2.92454e-15	TRUE	Layer_2-3_ExN	24.0206	25.9896	Cortex
6.85867e-14	0.1082	0.558	0.486	3.43619e-11	DS_vs_WT	Bcl2l2	1.85631e-13	TRUE	Layer_2-3_ExN	1.56444	1.76416	Cortex
4.3681e-13	0.106412	0.208	0.155	2.18842e-10	DS_vs_WT	Ggt7	1.10985e-12	TRUE	Layer_2-3_ExN	0.37831	0.483817	Cortex
3.32641e-17	0.105313	0.201	0.144	1.66653e-14	DS_vs_WT	Optn	1.08984e-16	TRUE	Layer_2-3_ExN	0.36397	0.46726	Cortex
5.73902e-15	0.0959012	0.192	0.14	2.87525e-12	DS_vs_WT	Mdm2	1.72171e-14	FALSE	Layer_2-3_ExN	0.330166	0.421592	Cortex
9.25665e-11	0.0940224	0.089	0.057	4.63758e-08	DS_vs_WT	Cldn5	2.05795e-10	FALSE	Layer_2-3_ExN	0.150442	0.227914	Cortex
5.63229e-21	0.0938445	0.641	0.557	2.82177e-18	DS_vs_WT	Ctnnb1	2.1576e-20	FALSE	Layer_2-3_ExN	2.68378	2.93136	Cortex
2.51523e-16	0.0915784	0.137	0.091	1.26013e-13	DS_vs_WT	Neurod1	7.92775e-16	FALSE	Layer_2-3_ExN	0.236267	0.317286	Cortex
3.46402e-12	0.0897653	0.101	0.065	1.73547e-09	DS_vs_WT	Pdgfra	8.29366e-12	FALSE	Layer_2-3_ExN	0.1685	0.243514	Cortex
8.91655e-11	0.088185	0.11	0.074	4.46719e-08	DS_vs_WT	Gria4	2.0002e-10	FALSE	Layer_2-3_ExN	0.180557	0.25497	Cortex
4.33906e-21	0.0861467	0.145	0.094	2.17387e-18	DS_vs_WT	Irf3	1.71496e-20	FALSE	Layer_2-3_ExN	0.224332	0.299667	Cortex
8.52297e-21	0.0840973	0.085	0.045	4.27001e-18	DS_vs_WT	Notch2	3.21548e-20	FALSE	Layer_2-3_ExN	0.106582	0.173004	Cortex
1.1981e-08	0.0831925	0.201	0.16	6.0025e-06	DS_vs_WT	Nrf1	2.42543e-08	FALSE	Layer_2-3_ExN	0.394347	0.477115	Cortex
1.82811e-13	0.0810411	0.114	0.075	9.15881e-11	DS_vs_WT	Cdkn1a	4.74165e-13	FALSE	Layer_2-3_ExN	0.173264	0.241057	Cortex
5.7331e-10	0.0803082	0.477	0.419	2.87228e-07	DS_vs_WT	Psen1	1.20978e-09	FALSE	Layer_2-3_ExN	1.37915	1.51534	Cortex
5.05315e-11	0.0794701	0.064	0.037	2.53163e-08	DS_vs_WT	Fzd7	1.15187e-10	FALSE	Layer_2-3_ExN	0.0891485	0.150827	Cortex
3.61016e-13	0.0792326	0.835	0.779	1.80869e-10	DS_vs_WT	Cnr1	9.26733e-13	FALSE	Layer_2-3_ExN	5.60169	5.97439	Cortex
2.62403e-06	0.0782158	0.21	0.174	0.00131464	DS_vs_WT	Tbk1	4.41474e-06	FALSE	Layer_2-3_ExN	0.425933	0.505374	Cortex
8.02059e-16	0.0780211	0.184	0.134	4.01832e-13	DS_vs_WT	H2afx	2.49641e-15	FALSE	Layer_2-3_ExN	0.339684	0.414129	Cortex
8.51791e-14	0.0775675	0.12	0.081	4.26747e-11	DS_vs_WT	Sirt3	2.2806e-13	FALSE	Layer_2-3_ExN	0.18778	0.25339	Cortex
3.80344e-06	0.0775457	0.263	0.224	0.00190553	DS_vs_WT	Gpx1	6.23064e-06	FALSE	Layer_2-3_ExN	0.560799	0.646988	Cortex
2.81743e-12	0.0765412	0.082	0.05	1.41153e-09	DS_vs_WT	Aldh4a1	6.81108e-12	FALSE	Layer_2-3_ExN	0.115113	0.175872	Cortex
3.56873e-09	0.0759644	0.199	0.157	1.78793e-06	DS_vs_WT	Glb1	7.34391e-09	FALSE	Layer_2-3_ExN	0.396752	0.472268	Cortex
3.08497e-18	0.0711962	0.528	0.453	1.54557e-15	DS_vs_WT	Smurf1	1.03805e-17	FALSE	Layer_2-3_ExN	1.51155	1.6386	Cortex
9.99361e-15	0.070813	0.19	0.143	5.0068e-12	DS_vs_WT	Mx1	2.92754e-14	FALSE	Layer_2-3_ExN	0.363419	0.43201	Cortex
5.31058e-14	0.0707508	0.235	0.184	2.6606e-11	DS_vs_WT	Nfkb1	1.46926e-13	FALSE	Layer_2-3_ExN	0.473544	0.547609	Cortex
2.27243e-08	0.0688954	0.998	0.995	1.13849e-05	DS_vs_WT	Satb2	4.52669e-08	FALSE	Layer_2-3_ExN	35.4141	37.1953	Cortex
2.43818e-16	0.068574	0.207	0.156	1.22153e-13	DS_vs_WT	Mdk	7.78341e-16	FALSE	Layer_2-3_ExN	0.401577	0.469805	Cortex
2.81533e-09	0.0683009	0.13	0.096	1.41048e-06	DS_vs_WT	Dgat1	5.8418e-09	FALSE	Layer_2-3_ExN	0.227467	0.286976	Cortex
1.07155e-10	0.0679419	0.53	0.471	5.36844e-08	DS_vs_WT	Gria1	2.36119e-10	FALSE	Layer_2-3_ExN	1.98593	2.12992	Cortex
3.38883e-08	0.0658334	0.306	0.261	1.6978e-05	DS_vs_WT	Psmb2	6.59234e-08	FALSE	Layer_2-3_ExN	0.761002	0.843222	Cortex
1.14858e-06	0.0655684	0.38	0.336	0.000575439	DS_vs_WT	Hras	1.95888e-06	FALSE	Layer_2-3_ExN	0.947985	1.03856	Cortex
6.53769e-08	0.0603507	0.09	0.063	3.27538e-05	DS_vs_WT	Clu	1.23325e-07	FALSE	Layer_2-3_ExN	0.141418	0.190179	Cortex
2.09727e-12	0.0602254	0.073	0.044	1.05073e-09	DS_vs_WT	Notch3	5.1198e-12	FALSE	Layer_2-3_ExN	0.105039	0.152145	Cortex
0.00141121	0.0601557	0.092	0.074	0.707018	DS_vs_WT	Tle4	0.00175696	FALSE	Layer_2-3_ExN	0.176952	0.227064	Cortex
3.27819e-11	0.0596623	0.138	0.101	1.64238e-08	DS_vs_WT	Cd68	7.6287e-11	FALSE	Layer_2-3_ExN	0.245209	0.297784	Cortex
9.33061e-07	0.0581051	0.117	0.089	0.000467463	DS_vs_WT	Psmb10	1.63614e-06	FALSE	Layer_2-3_ExN	0.200296	0.249625	Cortex
2.18321e-10	0.0577659	0.077	0.049	1.09379e-07	DS_vs_WT	Rela	4.72712e-10	FALSE	Layer_2-3_ExN	0.111177	0.156571	Cortex
7.36146e-20	0.0575901	0.806	0.736	3.68809e-17	DS_vs_WT	Txnrd1	2.65653e-19	FALSE	Layer_2-3_ExN	3.99275	4.19608	Cortex
2.53714e-10	0.0538339	0.059	0.035	1.27111e-07	DS_vs_WT	Psmb5	5.4461e-10	FALSE	Layer_2-3_ExN	0.0748883	0.115755	Cortex
6.35554e-08	0.0531224	0.731	0.683	3.18413e-05	DS_vs_WT	Ep300	1.21733e-07	FALSE	Layer_2-3_ExN	3.04936	3.20125	Cortex
1.8336e-05	0.0522917	0.768	0.731	0.00918633	DS_vs_WT	Mtor	2.79837e-05	FALSE	Layer_2-3_ExN	3.30446	3.46334	Cortex
0.00122783	0.0521507	0.138	0.115	0.615141	DS_vs_WT	Axin2	0.00154409	FALSE	Layer_2-3_ExN	0.260347	0.306739	Cortex
1.64995e-06	0.0521003	0.052	0.033	0.000826623	DS_vs_WT	Notch1	2.79481e-06	FALSE	Layer_2-3_ExN	0.0772284	0.116842	Cortex
8.10908e-06	0.051722	0.367	0.328	0.00406265	DS_vs_WT	Hif1a	1.30269e-05	FALSE	Layer_2-3_ExN	1.00036	1.07337	Cortex
0.000180886	0.0516345	0.096	0.075	0.0906238	DS_vs_WT	Prdx6	0.000247476	FALSE	Layer_2-3_ExN	0.170969	0.213637	Cortex
0.000148548	0.0498537	0.055	0.039	0.0744227	DS_vs_WT	Otx1	0.000205492	FALSE	Layer_2-3_ExN	0.0898882	0.128209	Cortex
1.18081e-14	0.0491722	0.128	0.091	5.91588e-12	DS_vs_WT	Irf9	3.41887e-14	FALSE	Layer_2-3_ExN	0.2167	0.258884	Cortex
5.48588e-05	0.0476985	0.11	0.087	0.0274842	DS_vs_WT	Ptch1	7.89586e-05	FALSE	Layer_2-3_ExN	0.203258	0.243705	Cortex
3.32118e-07	0.0475769	0.108	0.082	0.000166391	DS_vs_WT	Arx	5.99257e-07	FALSE	Layer_2-3_ExN	0.21268	0.253338	Cortex
1.14464e-06	0.0465526	0.117	0.091	0.000573463	DS_vs_WT	Sufu	1.95888e-06	FALSE	Layer_2-3_ExN	0.212879	0.252654	Cortex
5.23506e-05	0.0458334	0.067	0.048	0.0262276	DS_vs_WT	Mavs	7.57866e-05	FALSE	Layer_2-3_ExN	0.102145	0.137722	Cortex
9.96478e-06	0.0455686	0.229	0.197	0.00499236	DS_vs_WT	Plk3	1.5704e-05	FALSE	Layer_2-3_ExN	0.504859	0.55315	Cortex
9.43608e-13	0.0448093	0.141	0.105	4.72747e-10	DS_vs_WT	Slc17a7	2.37332e-12	FALSE	Layer_2-3_ExN	0.266426	0.306378	Cortex
6.49438e-07	0.0412647	0.057	0.038	0.000325368	DS_vs_WT	Tnfrsf1a	1.14688e-06	FALSE	Layer_2-3_ExN	0.085419	0.116913	Cortex
0.00264696	0.0398231	0.256	0.231	1	DS_vs_WT	Ythdf1	0.00326284	FALSE	Layer_2-3_ExN	0.618527	0.663826	Cortex
0.000323021	0.0383515	0.102	0.082	0.161834	DS_vs_WT	Mif	0.000432432	FALSE	Layer_2-3_ExN	0.197001	0.229248	Cortex
2.42414e-07	0.0381317	0.185	0.154	0.00012145	DS_vs_WT	Cx3cl1	4.40592e-07	FALSE	Layer_2-3_ExN	0.387754	0.424922	Cortex
4.4162e-08	0.0379154	0.068	0.046	2.21251e-05	DS_vs_WT	Bcan	8.52429e-08	FALSE	Layer_2-3_ExN	0.114137	0.143806	Cortex
5.92586e-07	0.036972	0.23	0.198	0.000296885	DS_vs_WT	Atrip	1.05396e-06	FALSE	Layer_2-3_ExN	0.503485	0.542513	Cortex
0.00750985	0.0364331	0.079	0.065	1	DS_vs_WT	Foxo1	0.00886234	FALSE	Layer_2-3_ExN	0.153264	0.182759	Cortex
0.00689854	0.0339671	0.074	0.06	1	DS_vs_WT	Ccl8	0.0081797	FALSE	Layer_2-3_ExN	0.131594	0.158553	Cortex
0.00046255	0.0338401	0.115	0.095	0.231738	DS_vs_WT	Aldh1l1	0.000609391	FALSE	Layer_2-3_ExN	0.247574	0.277183	Cortex
4.25047e-05	0.0331652	0.074	0.056	0.0212948	DS_vs_WT	Traf2	6.18928e-05	FALSE	Layer_2-3_ExN	0.130717	0.157012	Cortex
8.18899e-06	0.0323712	0.063	0.045	0.00410268	DS_vs_WT	Wnt3	1.30709e-05	FALSE	Layer_2-3_ExN	0.103261	0.128296	Cortex
2.74732e-05	0.0316818	0.094	0.074	0.0137641	DS_vs_WT	Ddit3	4.0963e-05	FALSE	Layer_2-3_ExN	0.16071	0.186482	Cortex
7.93191e-05	0.0297349	0.068	0.05	0.0397389	DS_vs_WT	Nr4a2	0.000112219	FALSE	Layer_2-3_ExN	0.165352	0.189619	Cortex
2.37713e-07	0.0287349	0.119	0.095	0.000119094	DS_vs_WT	Fuca1	4.35225e-07	FALSE	Layer_2-3_ExN	0.219398	0.243929	Cortex
0.000736347	0.0274256	0.07	0.055	0.36891	DS_vs_WT	Rad9a	0.000940258	FALSE	Layer_2-3_ExN	0.126498	0.148118	Cortex
0.020919	0.0271082	0.055	0.044	1	DS_vs_WT	Lix1	0.0237848	FALSE	Layer_2-3_ExN	0.0998328	0.120694	Cortex
1.602e-09	0.0266063	0.07	0.05	8.02604e-07	DS_vs_WT	Cxcl5	3.35209e-09	FALSE	Layer_2-3_ExN	0.122706	0.143604	Cortex
1.09708e-06	0.0260255	0.914	0.885	0.000549635	DS_vs_WT	Dtx4	1.89703e-06	FALSE	Layer_2-3_ExN	6.81738	6.95968	Cortex
3.1966e-06	0.0252401	0.2	0.173	0.0016015	DS_vs_WT	S100a10	5.27121e-06	FALSE	Layer_2-3_ExN	0.45499	0.480669	Cortex
1.02081e-12	0.0248525	0.233	0.194	5.11424e-10	DS_vs_WT	Rnf5	2.54181e-12	FALSE	Layer_2-3_ExN	0.51103	0.537285	Cortex
0.000627757	0.0240487	0.08	0.064	0.314506	DS_vs_WT	Wnt7a	0.000814122	FALSE	Layer_2-3_ExN	0.148605	0.167912	Cortex
0.000581504	0.0233945	0.145	0.126	0.291333	DS_vs_WT	Pex1	0.000762076	FALSE	Layer_2-3_ExN	0.304502	0.325828	Cortex
6.29404e-05	0.023293	0.17	0.148	0.0315331	DS_vs_WT	Txnrd3	8.95552e-05	FALSE	Layer_2-3_ExN	0.381976	0.40447	Cortex
0.00128903	0.0214377	0.27	0.247	0.645803	DS_vs_WT	Npc1	0.0016129	FALSE	Layer_2-3_ExN	0.669255	0.694245	Cortex
0.0690916	0.0205353	0.099	0.088	1	DS_vs_WT	Aars2	0.0754897	FALSE	Layer_2-3_ExN	0.201811	0.21904	Cortex
0.423366	0.0199739	0.103	0.096	1	DS_vs_WT	Gad1	0.432042	FALSE	Layer_2-3_ExN	0.242876	0.260203	Cortex
0.000656912	0.0194736	0.198	0.176	0.329113	DS_vs_WT	Lhx6	0.00084315	FALSE	Layer_2-3_ExN	0.517479	0.538101	Cortex
0.00405471	0.0192211	0.059	0.047	1	DS_vs_WT	Rfx5	0.0048774	FALSE	Layer_2-3_ExN	0.104899	0.119718	Cortex
4.05042e-06	0.0183692	0.393	0.359	0.00202926	DS_vs_WT	Tle1	6.59185e-06	FALSE	Layer_2-3_ExN	1.21145	1.23979	Cortex
8.43923e-05	0.0150863	0.342	0.314	0.0422806	DS_vs_WT	Psme1	0.000118721	FALSE	Layer_2-3_ExN	0.913898	0.934017	Cortex
0.00901017	0.0118483	0.456	0.434	1	DS_vs_WT	Dlg4	0.0105827	FALSE	Layer_2-3_ExN	1.39657	1.41633	Cortex
6.21021e-05	0.011489	0.093	0.078	0.0311132	DS_vs_WT	Pecam1	8.88703e-05	FALSE	Layer_2-3_ExN	0.177082	0.186493	Cortex
9.39347e-06	0.0107445	0.096	0.08	0.00470613	DS_vs_WT	Gsr	1.48979e-05	FALSE	Layer_2-3_ExN	0.195293	0.204229	Cortex
0.0325342	0.00976006	0.132	0.121	1	DS_vs_WT	Axin1	0.0366562	FALSE	Layer_2-3_ExN	0.286369	0.295101	Cortex
0.0675111	0.00891615	0.05	0.043	1	DS_vs_WT	Gusb	0.0743817	FALSE	Layer_2-3_ExN	0.0997763	0.106594	Cortex
1.77677e-05	0.0075899	0.093	0.078	0.00890164	DS_vs_WT	Cxcr4	2.73097e-05	FALSE	Layer_2-3_ExN	0.187504	0.193768	Cortex
9.3117e-05	0.0075304	0.129	0.112	0.0466516	DS_vs_WT	Npy	0.000130259	FALSE	Layer_2-3_ExN	0.293217	0.299985	Cortex
3.91468e-05	0.00197532	0.097	0.084	0.0196125	DS_vs_WT	Mri1	5.73385e-05	FALSE	Layer_2-3_ExN	0.194591	0.196228	Cortex
1.50962e-05	0.00152812	0.081	0.068	0.00756322	DS_vs_WT	Il18	2.33476e-05	FALSE	Layer_2-3_ExN	0.158774	0.160002	Cortex
1.02764e-07	0.000713206	0.798	0.762	5.14848e-05	DS_vs_WT	Eif4g1	1.92393e-07	FALSE	Layer_2-3_ExN	4.2294	4.23198	Cortex
1	0	1	1	1	DS_vs_WT	Unnamed: 0	1	FALSE	Layer_2-3_ExN	1.09194e-177	1.01183e-178	Cortex
0.992227	-0.00250641	0.66	0.66	1	DS_vs_WT	Grin2b	0.996228	FALSE	Layer_2-3_ExN	3.1083	3.10117	Cortex
0.00316344	-0.00330442	0.079	0.069	1	DS_vs_WT	Fbln2	0.00384242	FALSE	Layer_2-3_ExN	0.189501	0.18678	Cortex
0.237105	-0.00335168	0.05	0.048	1	DS_vs_WT	Tap1	0.248064	FALSE	Layer_2-3_ExN	0.106762	0.104194	Cortex
0.00514831	-0.00345824	0.074	0.067	1	DS_vs_WT	Npc2	0.00613363	FALSE	Layer_2-3_ExN	0.153593	0.150831	Cortex
0.0349485	-0.00520772	0.057	0.053	1	DS_vs_WT	Nox1	0.0391989	FALSE	Layer_2-3_ExN	0.118141	0.114112	Cortex
0.28041	-0.00816433	0.057	0.056	1	DS_vs_WT	Cflar	0.290925	FALSE	Layer_2-3_ExN	0.124958	0.11861	Cortex
0.59967	-0.0147749	0.06	0.064	1	DS_vs_WT	Irf2	0.609461	FALSE	Layer_2-3_ExN	0.142762	0.131119	Cortex
0.000223593	-0.0156342	0.053	0.048	0.11202	DS_vs_WT	Tfam	0.000300944	FALSE	Layer_2-3_ExN	0.115098	0.103079	Cortex
0.0029908	-0.015654	0.083	0.079	1	DS_vs_WT	Gli2	0.00365053	FALSE	Layer_2-3_ExN	0.181395	0.168645	Cortex
0.315482	-0.0164782	0.143	0.143	1	DS_vs_WT	Rars	0.324608	FALSE	Layer_2-3_ExN	0.362011	0.346543	Cortex
3.02993e-08	-0.0172012	0.191	0.171	1.518e-05	DS_vs_WT	Smpd1	5.94058e-08	FALSE	Layer_2-3_ExN	0.436712	0.419684	Cortex
0.305835	-0.0179276	0.134	0.135	1	DS_vs_WT	Aldh2	0.315988	FALSE	Layer_2-3_ExN	0.324161	0.307808	Cortex
0.365851	-0.0180811	0.164	0.165	1	DS_vs_WT	Sirt5	0.374884	FALSE	Layer_2-3_ExN	0.40271	0.38524	Cortex
0.619012	-0.0181213	0.116	0.121	1	DS_vs_WT	Traf6	0.626561	FALSE	Layer_2-3_ExN	0.280172	0.264192	Cortex
0.673303	-0.0206297	0.221	0.227	1	DS_vs_WT	Slc17a6	0.678755	FALSE	Layer_2-3_ExN	0.616373	0.593425	Cortex
0.0164459	-0.0206356	0.278	0.271	1	DS_vs_WT	Sp1	0.0190466	FALSE	Layer_2-3_ExN	0.709436	0.685159	Cortex
0.255575	-0.0210409	0.044	0.05	1	DS_vs_WT	Plin2	0.266268	FALSE	Layer_2-3_ExN	0.113778	0.097652	Cortex
0.0039437	-0.0210611	0.063	0.061	1	DS_vs_WT	Myd88	0.0047669	FALSE	Layer_2-3_ExN	0.14627	0.129658	Cortex
0.178569	-0.0233452	0.048	0.053	1	DS_vs_WT	Nbn	0.187611	FALSE	Layer_2-3_ExN	0.118189	0.100241	Cortex
0.177299	-0.0239112	0.22	0.22	1	DS_vs_WT	Mettl3	0.187065	FALSE	Layer_2-3_ExN	0.566545	0.540795	Cortex
0.0594684	-0.0252711	0.043	0.052	1	DS_vs_WT	Casp7	0.0658117	FALSE	Layer_2-3_ExN	0.111431	0.0921319	Cortex
0.0184793	-0.027455	0.058	0.061	1	DS_vs_WT	Ascl1	0.0213025	FALSE	Layer_2-3_ExN	0.142173	0.120643	Cortex
0.00979365	-0.0289358	0.048	0.05	1	DS_vs_WT	Ccl25	0.0114489	FALSE	Layer_2-3_ExN	0.119649	0.0974162	Cortex
0.147841	-0.0294388	0.061	0.066	1	DS_vs_WT	Gad2	0.157993	FALSE	Layer_2-3_ExN	0.161163	0.137709	Cortex
0.168331	-0.0297513	0.067	0.074	1	DS_vs_WT	Dynll1	0.178359	FALSE	Layer_2-3_ExN	0.169405	0.145536	Cortex
0.0455171	-0.0307081	0.064	0.066	1	DS_vs_WT	Sall1	0.0505971	FALSE	Layer_2-3_ExN	0.161759	0.137292	Cortex
0.0917405	-0.0310776	0.071	0.076	1	DS_vs_WT	Stat2	0.0988892	FALSE	Layer_2-3_ExN	0.177343	0.152253	Cortex
0.160257	-0.0329918	0.208	0.205	1	DS_vs_WT	Tnc	0.17053	FALSE	Layer_2-3_ExN	0.772921	0.732838	Cortex
0.0876776	-0.0335076	0.06	0.069	1	DS_vs_WT	Ythdc2	0.095335	FALSE	Layer_2-3_ExN	0.159918	0.133288	Cortex
0.000778543	-0.0370826	0.472	0.46	0.39005	DS_vs_WT	Sars	0.000989068	FALSE	Layer_2-3_ExN	1.57252	1.50724	Cortex
0.0912356	-0.04001	0.094	0.104	1	DS_vs_WT	Topbp1	0.0987725	FALSE	Layer_2-3_ExN	0.251679	0.217444	Cortex
0.00465783	-0.0416766	0.113	0.116	1	DS_vs_WT	Lhx2	0.00557596	FALSE	Layer_2-3_ExN	0.289036	0.252331	Cortex
0.0691231	-0.0416964	0.178	0.184	1	DS_vs_WT	Rad50	0.0754897	FALSE	Layer_2-3_ExN	0.459763	0.418178	Cortex
1.26132e-05	-0.0455206	0.426	0.411	0.00631923	DS_vs_WT	Lrp6	1.97528e-05	FALSE	Layer_2-3_ExN	1.34426	1.27145	Cortex
0.0115022	-0.0464072	0.119	0.125	1	DS_vs_WT	Prkaa1	0.0133834	FALSE	Layer_2-3_ExN	0.314881	0.273258	Cortex
0.0426318	-0.0476336	0.119	0.13	1	DS_vs_WT	Smurf2	0.0476024	FALSE	Layer_2-3_ExN	0.314102	0.271422	Cortex
0.00146287	-0.048377	0.042	0.056	0.732899	DS_vs_WT	Ifit2	0.00181221	FALSE	Layer_2-3_ExN	0.129675	0.0924225	Cortex
6.93483e-06	-0.0503046	0.351	0.339	0.00347435	DS_vs_WT	Otud4	1.12128e-05	FALSE	Layer_2-3_ExN	1.04798	0.977797	Cortex
0.0269259	-0.0511886	0.132	0.143	1	DS_vs_WT	Sirt1	0.0304753	FALSE	Layer_2-3_ExN	0.354453	0.307238	Cortex
2.06206e-05	-0.0543503	0.046	0.066	0.0103309	DS_vs_WT	Eef1aknmt	3.09309e-05	FALSE	Layer_2-3_ExN	0.145454	0.103104	Cortex
0.0195697	-0.0555488	0.402	0.406	1	DS_vs_WT	Arf1	0.0224555	FALSE	Layer_2-3_ExN	1.33789	1.24959	Cortex
0.00109603	-0.0576828	0.073	0.092	0.549113	DS_vs_WT	Cck	0.00138534	FALSE	Layer_2-3_ExN	0.224085	0.176108	Cortex
9.57928e-05	-0.0578089	0.239	0.24	0.0479922	DS_vs_WT	Cpt1c	0.000133254	FALSE	Layer_2-3_ExN	0.623075	0.559324	Cortex
0.0209192	-0.0593169	0.476	0.501	1	DS_vs_WT	Anxa6	0.0237848	FALSE	Layer_2-3_ExN	1.88668	1.7704	Cortex
0.114464	-0.0603429	0.293	0.305	1	DS_vs_WT	Nlgn1	0.122851	FALSE	Layer_2-3_ExN	1.08386	0.998493	Cortex
3.17123e-06	-0.0647384	0.041	0.06	0.00158879	DS_vs_WT	Pdk3	5.26424e-06	FALSE	Layer_2-3_ExN	0.132181	0.082499	Cortex
1.8431e-05	-0.0652262	0.093	0.119	0.00923394	DS_vs_WT	Cntn6	2.79837e-05	FALSE	Layer_2-3_ExN	0.334095	0.275122	Cortex
0.00018269	-0.0656899	0.063	0.079	0.0915275	DS_vs_WT	Syt9	0.000248578	FALSE	Layer_2-3_ExN	0.188563	0.135658	Cortex
3.48991e-05	-0.0660342	0.137	0.146	0.0174844	DS_vs_WT	Sod2	5.14193e-05	FALSE	Layer_2-3_ExN	0.357661	0.29692	Cortex
0.00282357	-0.066087	0.142	0.155	1	DS_vs_WT	Cxcl13	0.0034634	FALSE	Layer_2-3_ExN	0.384513	0.322522	Cortex
0.000438747	-0.0723726	0.287	0.295	0.219812	DS_vs_WT	Crebbp	0.000584214	FALSE	Layer_2-3_ExN	0.83421	0.744467	Cortex
0.000590725	-0.0731549	0.587	0.589	0.295953	DS_vs_WT	Syn1	0.000770107	FALSE	Layer_2-3_ExN	2.51446	2.3407	Cortex
1.99598e-05	-0.0732918	0.073	0.086	0.00999988	DS_vs_WT	Mag	3.01212e-05	FALSE	Layer_2-3_ExN	0.209276	0.149377	Cortex
0.000639015	-0.0744968	0.123	0.138	0.320147	DS_vs_WT	Aldh9a1	0.000824429	FALSE	Layer_2-3_ExN	0.34549	0.277776	Cortex
0.000171563	-0.0763415	0.439	0.478	0.0859529	DS_vs_WT	Ythdc1	0.000236017	FALSE	Layer_2-3_ExN	1.53771	1.40692	Cortex
2.10516e-19	-0.0764341	0.581	0.543	1.05468e-16	DS_vs_WT	Gsk3b	7.48834e-19	FALSE	Layer_2-3_ExN	2.12441	1.96318	Cortex
1.3543e-11	-0.0782819	0.03	0.057	6.78506e-09	DS_vs_WT	Lamp2	3.18134e-11	FALSE	Layer_2-3_ExN	0.12954	0.0698837	Cortex
0.000185845	-0.0806726	0.172	0.19	0.0931084	DS_vs_WT	Atf6	0.000251497	FALSE	Layer_2-3_ExN	0.471388	0.391369	Cortex
1.43806e-05	-0.0882716	0.099	0.122	0.00720467	DS_vs_WT	Trp53bp1	2.23798e-05	FALSE	Layer_2-3_ExN	0.296002	0.219083	Cortex
1.22849e-07	-0.0916163	0.44	0.442	6.15476e-05	DS_vs_WT	Mecp2	2.2828e-07	FALSE	Layer_2-3_ExN	1.45639	1.30525	Cortex
0.000461236	-0.0962756	0.384	0.41	0.231079	DS_vs_WT	Jak1	0.000609391	FALSE	Layer_2-3_ExN	1.34085	1.18974	Cortex
3.40584e-05	-0.0965016	0.452	0.47	0.0170632	DS_vs_WT	Mapk14	5.04793e-05	FALSE	Layer_2-3_ExN	1.5444	1.37977	Cortex
1.92321e-10	-0.0969146	0.048	0.071	9.63527e-08	DS_vs_WT	Ythdf2	4.20069e-10	FALSE	Layer_2-3_ExN	0.167634	0.0917735	Cortex
4.11919e-07	-0.0975591	0.214	0.228	0.000206372	DS_vs_WT	Gba	7.37899e-07	FALSE	Layer_2-3_ExN	0.610725	0.505404	Cortex
3.02843e-06	-0.0990423	0.798	0.806	0.00151724	DS_vs_WT	Cux1	5.06093e-06	FALSE	Layer_2-3_ExN	4.70143	4.32316	Cortex
9.87528e-14	-0.0997211	0.027	0.053	4.94751e-11	DS_vs_WT	Prdx2	2.61379e-13	FALSE	Layer_2-3_ExN	0.128105	0.0527622	Cortex
3.3588e-11	-0.106217	0.054	0.086	1.68276e-08	DS_vs_WT	Kras	7.7439e-11	TRUE	Layer_2-3_ExN	0.203512	0.118088	Cortex
1.70667e-07	-0.106298	0.105	0.135	8.55039e-05	DS_vs_WT	Braf	3.14785e-07	TRUE	Layer_2-3_ExN	0.327673	0.233367	Cortex
5.94262e-15	-0.106323	0.292	0.358	2.97725e-12	DS_vs_WT	Fabp7	1.76156e-14	TRUE	Layer_2-3_ExN	1.2986	1.13529	Cortex
9.19897e-09	-0.1109	0.088	0.12	4.60868e-06	DS_vs_WT	Wtap	1.87749e-08	TRUE	Layer_2-3_ExN	0.295048	0.199228	Cortex
4.65169e-12	-0.123049	0.071	0.107	2.3305e-09	DS_vs_WT	Creb1	1.10312e-11	TRUE	Layer_2-3_ExN	0.261605	0.158463	Cortex
5.0886e-11	-0.124742	0.516	0.516	2.54939e-08	DS_vs_WT	Sorl1	1.15187e-10	TRUE	Layer_2-3_ExN	2.12008	1.86163	Cortex
1.07402e-06	-0.132705	0.481	0.507	0.000538083	DS_vs_WT	Lamp1	1.87014e-06	TRUE	Layer_2-3_ExN	2.01387	1.74901	Cortex
2.45224e-08	-0.136262	0.22	0.255	1.22857e-05	DS_vs_WT	Casp3	4.84609e-08	TRUE	Layer_2-3_ExN	0.695888	0.543043	Cortex
1.61179e-08	-0.139641	0.248	0.283	8.07505e-06	DS_vs_WT	Itch	3.23657e-08	TRUE	Layer_2-3_ExN	0.802617	0.636316	Cortex
6.48576e-08	-0.13998	0.127	0.155	3.24936e-05	DS_vs_WT	Fgfr2	1.23279e-07	TRUE	Layer_2-3_ExN	0.470436	0.334468	Cortex
4.04201e-10	-0.147867	0.228	0.258	2.02505e-07	DS_vs_WT	Sox5	8.60223e-10	TRUE	Layer_2-3_ExN	0.751724	0.581079	Cortex
2.43372e-14	-0.161928	0.199	0.261	1.2193e-11	DS_vs_WT	Pdia3	6.80896e-14	TRUE	Layer_2-3_ExN	0.771034	0.583003	Cortex
3.35833e-24	-0.167882	0.06	0.113	1.68252e-21	DS_vs_WT	Zhx2	1.54856e-23	TRUE	Layer_2-3_ExN	0.270947	0.131332	Cortex
5.04725e-26	-0.170168	0.062	0.119	2.52867e-23	DS_vs_WT	Ogt	2.37126e-25	TRUE	Layer_2-3_ExN	0.284182	0.141303	Cortex
2.00115e-12	-0.176082	0.282	0.339	1.00258e-09	DS_vs_WT	Jak2	4.93352e-12	TRUE	Layer_2-3_ExN	1.03531	0.80146	Cortex
9.97231e-14	-0.176983	0.217	0.267	4.99613e-11	DS_vs_WT	Wars	2.61379e-13	TRUE	Layer_2-3_ExN	0.734667	0.534401	Cortex
6.69135e-14	-0.185241	0.202	0.251	3.35237e-11	DS_vs_WT	Cd47	1.83093e-13	TRUE	Layer_2-3_ExN	0.727287	0.519152	Cortex
6.30979e-18	-0.192853	0.129	0.181	3.1612e-15	DS_vs_WT	Csnk1a1	2.09485e-17	TRUE	Layer_2-3_ExN	0.48723	0.301139	Cortex
7.01052e-17	-0.206292	0.213	0.274	3.51227e-14	DS_vs_WT	Mapk1	2.26704e-16	TRUE	Layer_2-3_ExN	0.814259	0.572531	Cortex
1.39405e-27	-0.224127	0.124	0.2	6.98419e-25	DS_vs_WT	Gabra1	7.08405e-27	TRUE	Layer_2-3_ExN	0.55544	0.331632	Cortex
2.73416e-22	-0.224937	0.164	0.215	1.36981e-19	DS_vs_WT	Ptprd	1.13468e-21	TRUE	Layer_2-3_ExN	0.628545	0.393436	Cortex
2.35307e-23	-0.234114	0.167	0.235	1.17889e-20	DS_vs_WT	Cr1l	1.02792e-22	TRUE	Layer_2-3_ExN	0.649899	0.402755	Cortex
6.24613e-30	-0.23722	0.079	0.144	3.12931e-27	DS_vs_WT	Unc5d	3.45619e-29	TRUE	Layer_2-3_ExN	0.417493	0.202571	Cortex
3.48935e-22	-0.266942	0.298	0.364	1.74816e-19	DS_vs_WT	Rac1	1.42434e-21	TRUE	Layer_2-3_ExN	1.29095	0.90396	Cortex
2.00927e-54	-0.322145	0.773	0.807	1.00664e-51	DS_vs_WT	Apc	2.38242e-53	TRUE	Layer_2-3_ExN	5.46117	4.16816	Cortex
2.20157e-38	-0.323942	0.343	0.425	1.10299e-35	DS_vs_WT	Fto	1.7131e-37	TRUE	Layer_2-3_ExN	1.4269	0.938813	Cortex
1.63293e-35	-0.32945	0.457	0.546	8.181e-33	DS_vs_WT	Tnr	1.12945e-34	TRUE	Layer_2-3_ExN	2.29094	1.61906	Cortex
6.32767e-45	-0.35986	0.128	0.221	3.17016e-42	DS_vs_WT	Vcan	5.83552e-44	TRUE	Layer_2-3_ExN	0.731051	0.348905	Cortex
1.64322e-41	-0.3663	0.408	0.467	8.23254e-39	DS_vs_WT	Dcx	1.46129e-40	TRUE	Layer_2-3_ExN	2.12732	1.42608	Cortex
2.44993e-61	-0.41352	0.216	0.339	1.22742e-58	DS_vs_WT	Nras	3.38908e-60	TRUE	Layer_2-3_ExN	1.10157	0.577834	Cortex
1.02022e-77	-0.486541	0.421	0.572	5.11133e-75	DS_vs_WT	Hsp90b1	1.69357e-76	TRUE	Layer_2-3_ExN	2.57675	1.55285	Cortex
4.51705e-64	-0.503477	0.397	0.511	2.26304e-61	DS_vs_WT	Mef2c	6.61615e-63	TRUE	Layer_2-3_ExN	2.51785	1.48151	Cortex
8.35695e-81	-0.546117	0.198	0.33	4.18683e-78	DS_vs_WT	Map2	1.60068e-79	TRUE	Layer_2-3_ExN	1.23927	0.533586	Cortex
1.35561e-206	-0.554335	0.789	0.947	6.7916e-204	DS_vs_WT	Cux2	1.12516e-204	TRUE	Layer_2-3_ExN	12.889	8.45802	Cortex
p_val	avg_log2FC	pct.1	pct.2	p_val_adj	comparison	gene	FDR	sig	celltype	exp.1	exp.2	Cortex
2.19782e-196	0.895864	0.367	0.128	1.10111e-193	DS_vs_WT	Col1a1	5.18684e-194	TRUE	Layer_2-4_ExN	0.442143	1.68343	Cortex
1.18589e-147	0.635347	0.776	0.575	5.9413e-145	DS_vs_WT	Dvl1	1.39935e-145	TRUE	Layer_2-4_ExN	3.16977	5.47695	Cortex
6.11156e-134	0.618563	0.465	0.238	3.06189e-131	DS_vs_WT	Igfbp2	4.80776e-132	TRUE	Layer_2-4_ExN	0.924427	1.95466	Cortex
8.53215e-100	0.58672	0.725	0.591	4.27461e-97	DS_vs_WT	Pou3f3	4.02718e-98	TRUE	Layer_2-4_ExN	3.74504	6.12624	Cortex
8.34157e-96	0.498104	0.556	0.355	4.17913e-93	DS_vs_WT	Cdkn1c	3.28102e-94	TRUE	Layer_2-4_ExN	1.69962	2.81282	Cortex
1.52616e-123	0.44287	0.963	0.904	7.64608e-121	DS_vs_WT	Ncan	9.00436e-122	TRUE	Layer_2-4_ExN	12.8029	17.7623	Cortex
5.98487e-30	0.384917	0.388	0.286	2.99842e-27	DS_vs_WT	Mdga1	3.44495e-29	TRUE	Layer_2-4_ExN	1.52443	2.29636	Cortex
9.79803e-57	0.370975	0.395	0.249	4.90881e-54	DS_vs_WT	Vars2	1.54156e-55	TRUE	Layer_2-4_ExN	0.903541	1.46171	Cortex
1.11068e-59	0.359083	0.649	0.493	5.56453e-57	DS_vs_WT	Vars	2.01632e-58	TRUE	Layer_2-4_ExN	2.43666	3.4079	Cortex
2.04396e-75	0.352417	0.994	0.98	1.02402e-72	DS_vs_WT	App	6.02967e-74	TRUE	Layer_2-4_ExN	28.3889	36.5207	Cortex
1.18967e-60	0.337351	0.903	0.847	5.96024e-58	DS_vs_WT	Lrp1	2.33968e-59	TRUE	Layer_2-4_ExN	8.48962	10.9895	Cortex
2.09781e-61	0.329621	0.298	0.163	1.051e-58	DS_vs_WT	Ldlr	4.50075e-60	TRUE	Layer_2-4_ExN	0.626053	1.04343	Cortex
1.36996e-39	0.251753	0.252	0.15	6.86351e-37	DS_vs_WT	Ifnar1	1.34713e-38	TRUE	Layer_2-4_ExN	0.52154	0.811625	Cortex
3.5182e-42	0.247002	0.417	0.291	1.76262e-39	DS_vs_WT	Grin1	4.15148e-41	TRUE	Layer_2-4_ExN	1.20262	1.61393	Cortex
2.48195e-36	0.239957	0.902	0.839	1.24346e-33	DS_vs_WT	Nlgn2	2.25285e-35	TRUE	Layer_2-4_ExN	7.54991	9.09708	Cortex
5.37442e-35	0.234307	0.418	0.302	2.69258e-32	DS_vs_WT	Dyrk1a	4.37366e-34	TRUE	Layer_2-4_ExN	1.27068	1.67109	Cortex
1.78244e-38	0.23428	0.187	0.099	8.93003e-36	DS_vs_WT	Lrp5	1.68262e-37	TRUE	Layer_2-4_ExN	0.299463	0.528584	Cortex
2.78695e-29	0.232066	0.286	0.192	1.39626e-26	DS_vs_WT	Tle1	1.566e-28	TRUE	Layer_2-4_ExN	0.770519	1.0795	Cortex
1.15741e-34	0.222833	0.51	0.39	5.79863e-32	DS_vs_WT	Rcan1	8.81126e-34	TRUE	Layer_2-4_ExN	1.80727	2.27615	Cortex
3.17761e-30	0.220726	0.148	0.077	1.59198e-27	DS_vs_WT	Fzd8	1.87479e-29	TRUE	Layer_2-4_ExN	0.24955	0.456125	Cortex
2.04474e-43	0.218798	0.136	0.058	1.02441e-40	DS_vs_WT	Acads	2.68088e-42	TRUE	Layer_2-4_ExN	0.193509	0.388962	Cortex
6.19046e-43	0.217536	0.263	0.159	3.10142e-40	DS_vs_WT	Dkk3	7.6892e-42	TRUE	Layer_2-4_ExN	0.724775	1.00548	Cortex
9.29765e-41	0.21377	0.216	0.122	4.65812e-38	DS_vs_WT	Ikbkg	9.97384e-40	TRUE	Layer_2-4_ExN	0.405479	0.629954	Cortex
8.38583e-45	0.212607	0.118	0.045	4.2013e-42	DS_vs_WT	Col1a2	1.23691e-43	TRUE	Layer_2-4_ExN	0.134103	0.314176	Cortex
3.82644e-26	0.208181	0.57	0.464	1.91705e-23	DS_vs_WT	Myc	1.84294e-25	TRUE	Layer_2-4_ExN	2.61239	3.17315	Cortex
9.50011e-20	0.205727	0.366	0.281	4.75956e-17	DS_vs_WT	Vegfa	3.24931e-19	TRUE	Layer_2-4_ExN	1.14596	1.47487	Cortex
1.53525e-26	0.195278	0.117	0.058	7.6916e-24	DS_vs_WT	Aif1	7.54831e-26	TRUE	Layer_2-4_ExN	0.187607	0.359744	Cortex
2.79384e-35	0.195196	0.278	0.181	1.39971e-32	DS_vs_WT	Qars	2.3548e-34	TRUE	Layer_2-4_ExN	0.676416	0.919295	Cortex
1.2312e-26	0.194167	0.197	0.121	6.16831e-24	DS_vs_WT	Trp53	6.18219e-26	TRUE	Layer_2-4_ExN	0.393034	0.59372	Cortex
8.46915e-32	0.193449	0.336	0.235	4.24304e-29	DS_vs_WT	Csf2ra	5.25979e-31	TRUE	Layer_2-4_ExN	0.944764	1.22383	Cortex
6.55838e-33	0.178023	0.514	0.399	3.28575e-30	DS_vs_WT	Ikbkb	4.29938e-32	TRUE	Layer_2-4_ExN	1.76775	2.13125	Cortex
6.09191e-36	0.173621	0.72	0.604	3.05205e-33	DS_vs_WT	Lmnb1	5.32478e-35	TRUE	Layer_2-4_ExN	3.76354	4.37273	Cortex
4.60865e-33	0.172657	0.107	0.046	2.30893e-30	DS_vs_WT	Ifnar2	3.10755e-32	TRUE	Layer_2-4_ExN	0.138811	0.28359	Cortex
2.10061e-22	0.170193	0.623	0.527	1.05241e-19	DS_vs_WT	Gria1	7.86895e-22	TRUE	Layer_2-4_ExN	4.08938	4.72662	Cortex
8.33367e-25	0.164589	0.33	0.241	4.17517e-22	DS_vs_WT	Hsf1	3.64212e-24	TRUE	Layer_2-4_ExN	0.924231	1.15677	Cortex
5.83825e-34	0.158756	0.09	0.034	2.92496e-31	DS_vs_WT	Kif7	4.30571e-33	TRUE	Layer_2-4_ExN	0.092761	0.219876	Cortex
4.41421e-23	0.157401	0.19	0.122	2.21152e-20	DS_vs_WT	Tyk2	1.82764e-22	TRUE	Layer_2-4_ExN	0.41566	0.578852	Cortex
4.21168e-25	0.155661	0.272	0.19	2.11005e-22	DS_vs_WT	Grip1	1.91145e-24	TRUE	Layer_2-4_ExN	0.703843	0.897965	Cortex
1.27409e-30	0.145315	0.175	0.103	6.3832e-28	DS_vs_WT	Gria4	7.70988e-30	TRUE	Layer_2-4_ExN	0.380858	0.527191	Cortex
6.56109e-08	0.138516	0.615	0.562	3.2871e-05	DS_vs_WT	Gabbr1	1.04623e-07	TRUE	Layer_2-4_ExN	3.27086	3.70124	Cortex
5.55753e-22	0.135915	0.126	0.072	2.78432e-19	DS_vs_WT	Tapbp	2.01781e-21	TRUE	Layer_2-4_ExN	0.225637	0.346717	Cortex
6.46825e-35	0.133654	0.31	0.215	3.24059e-32	DS_vs_WT	Gsto1	5.08836e-34	TRUE	Layer_2-4_ExN	0.842291	1.02112	Cortex
8.12213e-34	0.126201	0.099	0.043	4.06919e-31	DS_vs_WT	Alkbh5	5.80855e-33	TRUE	Layer_2-4_ExN	0.133899	0.237555	Cortex
1.00193e-13	0.123378	0.098	0.058	5.01969e-11	DS_vs_WT	Irf3	2.57018e-13	TRUE	Layer_2-4_ExN	0.174685	0.279564	Cortex
6.01678e-18	0.122011	0.182	0.124	3.0144e-15	DS_vs_WT	Ggt7	1.91886e-17	TRUE	Layer_2-4_ExN	0.436393	0.563155	Cortex
1.09535e-32	0.117071	0.166	0.097	5.48773e-30	DS_vs_WT	Fbln1	6.98658e-32	TRUE	Layer_2-4_ExN	0.382673	0.499552	Cortex
1.39911e-27	0.115332	0.509	0.41	7.00955e-25	DS_vs_WT	Smurf1	7.17805e-27	TRUE	Layer_2-4_ExN	1.89213	2.13282	Cortex
2.69052e-19	0.111596	0.7	0.616	1.34795e-16	DS_vs_WT	Mtor	8.94314e-19	TRUE	Layer_2-4_ExN	3.59298	3.96236	Cortex
2.44052e-18	0.109623	0.081	0.041	1.2227e-15	DS_vs_WT	Osmr	7.88989e-18	TRUE	Layer_2-4_ExN	0.122617	0.211243	Cortex
7.99453e-18	0.09917	0.159	0.107	4.00526e-15	DS_vs_WT	H2afx	2.48251e-17	FALSE	Layer_2-4_ExN	0.354049	0.450399	Cortex
9.0262e-16	0.0984479	0.052	0.022	4.52213e-13	DS_vs_WT	Fn1	2.59778e-15	FALSE	Layer_2-4_ExN	0.0688251	0.144307	Cortex
7.63949e-11	0.0980207	0.123	0.084	3.82738e-08	DS_vs_WT	Sirt3	1.54096e-10	FALSE	Layer_2-4_ExN	0.283227	0.373443	Cortex
2.0905e-07	0.0974035	0.951	0.933	0.000104734	DS_vs_WT	Satb2	3.1424e-07	FALSE	Layer_2-4_ExN	23.9343	25.6758	Cortex
1.61418e-15	0.0950377	0.084	0.047	8.08705e-13	DS_vs_WT	Cldn5	4.53508e-15	FALSE	Layer_2-4_ExN	0.160871	0.239919	Cortex
1.26194e-09	0.0890599	0.095	0.063	6.32231e-07	DS_vs_WT	Mri1	2.34502e-09	FALSE	Layer_2-4_ExN	0.196703	0.272905	Cortex
4.13133e-09	0.0880467	0.056	0.032	2.0698e-06	DS_vs_WT	Crym	7.33078e-09	FALSE	Layer_2-4_ExN	0.129358	0.200428	Cortex
3.14408e-21	0.0875977	0.484	0.4	1.57518e-18	DS_vs_WT	Bcl2l2	1.12425e-20	FALSE	Layer_2-4_ExN	1.74562	1.9175	Cortex
1.6094e-09	0.0825034	0.997	0.989	8.06309e-07	DS_vs_WT	Tubb3	2.91305e-09	FALSE	Layer_2-4_ExN	45.6942	48.4423	Cortex
8.76926e-12	0.0805744	0.108	0.072	4.3934e-09	DS_vs_WT	Ptch1	1.91625e-11	FALSE	Layer_2-4_ExN	0.233446	0.304294	Cortex
7.87493e-15	0.0751806	0.221	0.168	3.94534e-12	DS_vs_WT	Gpx1	2.08818e-14	FALSE	Layer_2-4_ExN	0.577218	0.661588	Cortex
4.63015e-08	0.0739629	0.124	0.092	2.31971e-05	DS_vs_WT	Neurod1	7.48436e-08	FALSE	Layer_2-4_ExN	0.316428	0.385678	Cortex
4.61902e-23	0.0724141	0.294	0.223	2.31413e-20	DS_vs_WT	Prdx5	1.87946e-22	FALSE	Layer_2-4_ExN	0.837505	0.93209	Cortex
6.93461e-12	0.0703944	0.16	0.118	3.47424e-09	DS_vs_WT	Nrf1	1.54393e-11	FALSE	Layer_2-4_ExN	0.403164	0.473328	Cortex
4.77496e-23	0.0665625	0.364	0.289	2.39226e-20	DS_vs_WT	Pink1	1.90999e-22	FALSE	Layer_2-4_ExN	1.1396	1.24063	Cortex
7.852e-25	0.0664315	0.102	0.058	3.93385e-22	DS_vs_WT	Sod1	3.49636e-24	FALSE	Layer_2-4_ExN	0.208687	0.265645	Cortex
7.92193e-11	0.0660939	0.099	0.067	3.96889e-08	DS_vs_WT	Ccl8	1.58439e-10	FALSE	Layer_2-4_ExN	0.224984	0.282409	Cortex
1.3582e-22	0.0640921	0.076	0.039	6.80457e-20	DS_vs_WT	Notch2	5.25467e-22	FALSE	Layer_2-4_ExN	0.136787	0.188427	Cortex
1.10094e-25	0.0638859	0.308	0.233	5.51573e-23	DS_vs_WT	Traf3	5.19645e-25	FALSE	Layer_2-4_ExN	0.866898	0.951427	Cortex
3.57471e-10	0.0633805	0.063	0.037	1.79093e-07	DS_vs_WT	Rela	6.91502e-10	FALSE	Layer_2-4_ExN	0.109059	0.158869	Cortex
2.01711e-11	0.060884	0.08	0.051	1.01057e-08	DS_vs_WT	Pdgfra	4.28864e-11	FALSE	Layer_2-4_ExN	0.168323	0.218683	Cortex
5.47959e-10	0.0591608	0.073	0.046	2.74527e-07	DS_vs_WT	Rad9a	1.04289e-09	FALSE	Layer_2-4_ExN	0.151386	0.199583	Cortex
1.26301e-05	0.0582788	0.083	0.061	0.00632769	DS_vs_WT	Psmb5	1.73297e-05	FALSE	Layer_2-4_ExN	0.194053	0.243275	Cortex
1.01813e-10	0.0577385	0.605	0.545	5.10085e-08	DS_vs_WT	Tle3	2.00233e-10	FALSE	Layer_2-4_ExN	3.20898	3.38085	Cortex
6.44061e-16	0.0549727	0.064	0.034	3.22675e-13	DS_vs_WT	Mdk	1.89998e-15	FALSE	Layer_2-4_ExN	0.100912	0.143671	Cortex
1.01071e-18	0.0524845	0.217	0.162	5.06365e-16	DS_vs_WT	Atrip	3.31288e-18	FALSE	Layer_2-4_ExN	0.591431	0.650392	Cortex
1.09432e-07	0.0523767	0.231	0.192	5.48254e-05	DS_vs_WT	Ythdf1	1.69907e-07	FALSE	Layer_2-4_ExN	0.721763	0.78542	Cortex
9.64108e-13	0.0518522	0.148	0.109	4.83018e-10	DS_vs_WT	Cd68	2.2753e-12	FALSE	Layer_2-4_ExN	0.383756	0.434394	Cortex
1.29209e-08	0.0515433	0.164	0.129	6.47336e-06	DS_vs_WT	Glb1	2.20966e-08	FALSE	Layer_2-4_ExN	0.461027	0.514169	Cortex
2.44311e-15	0.0514489	0.138	0.097	1.224e-12	DS_vs_WT	Mdm2	6.70435e-15	FALSE	Layer_2-4_ExN	0.326494	0.374653	Cortex
2.34107e-05	0.0512055	0.183	0.153	0.0117288	DS_vs_WT	Tbk1	3.12143e-05	FALSE	Layer_2-4_ExN	0.530267	0.585556	Cortex
6.00051e-07	0.047801	0.074	0.051	0.000300625	DS_vs_WT	Ddit3	8.79577e-07	FALSE	Layer_2-4_ExN	0.147444	0.186099	Cortex
6.20139e-05	0.0473912	0.104	0.081	0.031069	DS_vs_WT	Sufu	7.91097e-05	FALSE	Layer_2-4_ExN	0.249041	0.290752	Cortex
9.01806e-13	0.0459113	0.206	0.162	4.51805e-10	DS_vs_WT	Smpd1	2.14976e-12	FALSE	Layer_2-4_ExN	0.572675	0.623527	Cortex
6.35043e-15	0.0442489	0.252	0.2	3.18157e-12	DS_vs_WT	S100a10	1.70307e-14	FALSE	Layer_2-4_ExN	0.785121	0.840721	Cortex
0.00170081	0.0432799	0.103	0.084	0.852105	DS_vs_WT	Axin1	0.00190233	FALSE	Layer_2-4_ExN	0.255369	0.293599	Cortex
1.98273e-06	0.0411053	0.082	0.06	0.000993346	DS_vs_WT	Prdx6	2.80194e-06	FALSE	Layer_2-4_ExN	0.174557	0.208504	Cortex
1.00303e-12	0.0377329	0.282	0.233	5.02516e-10	DS_vs_WT	Optn	2.34371e-12	FALSE	Layer_2-4_ExN	0.898389	0.948695	Cortex
7.70883e-13	0.0370549	0.211	0.168	3.86213e-10	DS_vs_WT	Rnf5	1.85641e-12	FALSE	Layer_2-4_ExN	0.593989	0.635461	Cortex
1.07552e-15	0.0335294	0.566	0.499	5.38835e-13	DS_vs_WT	Ctnnb1	3.0581e-15	FALSE	Layer_2-4_ExN	3.09097	3.18716	Cortex
4.62845e-06	0.0329347	0.204	0.173	0.00231885	DS_vs_WT	Cpt1c	6.50187e-06	FALSE	Layer_2-4_ExN	0.591442	0.62819	Cortex
1.92194e-15	0.0311482	0.646	0.579	9.62891e-13	DS_vs_WT	Aars	5.33621e-15	FALSE	Layer_2-4_ExN	3.33578	3.43041	Cortex
0.0049519	0.0307844	0.062	0.049	1	DS_vs_WT	Rfx5	0.00543557	FALSE	Layer_2-4_ExN	0.154054	0.178944	Cortex
8.85478e-07	0.0306041	0.059	0.041	0.000443624	DS_vs_WT	Gusb	1.28204e-06	FALSE	Layer_2-4_ExN	0.132135	0.156408	Cortex
2.58361e-11	0.0293298	0.313	0.265	1.29439e-08	DS_vs_WT	Psme1	5.44405e-11	FALSE	Layer_2-4_ExN	1.01638	1.05779	Cortex
6.83545e-08	0.0291259	0.092	0.069	3.42456e-05	DS_vs_WT	Fuca1	1.08266e-07	FALSE	Layer_2-4_ExN	0.220692	0.245586	Cortex
5.37562e-15	0.02671	0.596	0.532	2.69318e-12	DS_vs_WT	Ep300	1.45821e-14	FALSE	Layer_2-4_ExN	2.92039	2.99364	Cortex
1.20776e-05	0.0259203	0.066	0.049	0.00605087	DS_vs_WT	Lhx2	1.66685e-05	FALSE	Layer_2-4_ExN	0.154201	0.175125	Cortex
3.57725e-25	0.0252649	0.567	0.484	1.7922e-22	DS_vs_WT	Pld3	1.65536e-24	FALSE	Layer_2-4_ExN	2.68083	2.74586	Cortex
0.000122914	0.0235119	0.993	0.984	0.0615799	DS_vs_WT	Mapt	0.000152672	FALSE	Layer_2-4_ExN	30.0271	30.5369	Cortex
5.61994e-07	0.0227352	0.1	0.078	0.000281559	DS_vs_WT	Dgat1	8.28942e-07	FALSE	Layer_2-4_ExN	0.262773	0.282831	Cortex
9.95042e-05	0.0220756	0.057	0.042	0.0498516	DS_vs_WT	Aldh4a1	0.000125577	FALSE	Layer_2-4_ExN	0.126965	0.144342	Cortex
0.0288912	0.0181947	0.059	0.05	1	DS_vs_WT	Rgs8	0.0301696	FALSE	Layer_2-4_ExN	0.159937	0.174658	Cortex
0.000116361	0.0170673	0.2	0.176	0.0582967	DS_vs_WT	Sirt5	0.000145297	FALSE	Layer_2-4_ExN	0.634492	0.653943	Cortex
6.978e-05	0.0155508	0.052	0.039	0.0349598	DS_vs_WT	Wnt3	8.85381e-05	FALSE	Layer_2-4_ExN	0.133743	0.146029	Cortex
5.77714e-06	0.0151145	0.096	0.077	0.00289434	DS_vs_WT	Irf9	8.06748e-06	FALSE	Layer_2-4_ExN	0.238384	0.251426	Cortex
1.37132e-05	0.0128227	0.159	0.133	0.0068703	DS_vs_WT	Tle4	1.8707e-05	FALSE	Layer_2-4_ExN	0.638745	0.653375	Cortex
1.66955e-08	0.0111469	0.071	0.051	8.36443e-06	DS_vs_WT	Sst	2.81438e-08	FALSE	Layer_2-4_ExN	0.202688	0.212016	Cortex
7.96058e-16	0.0107714	0.712	0.649	3.98825e-13	DS_vs_WT	Txnrd1	2.31938e-15	FALSE	Layer_2-4_ExN	4.43157	4.47227	Cortex
3.78492e-10	0.00911096	0.052	0.034	1.89624e-07	DS_vs_WT	Il5ra	7.26212e-10	FALSE	Layer_2-4_ExN	0.129193	0.136346	Cortex
0.000192406	0.00909712	0.052	0.041	0.0963955	DS_vs_WT	Il18	0.000231673	FALSE	Layer_2-4_ExN	0.129594	0.136739	Cortex
1.16888e-07	0.00827232	0.09	0.07	5.85607e-05	DS_vs_WT	Cxcr4	1.80297e-07	FALSE	Layer_2-4_ExN	0.237353	0.244468	Cortex
5.70366e-05	0.00532654	0.089	0.073	0.0285753	DS_vs_WT	Aars2	7.31556e-05	FALSE	Layer_2-4_ExN	0.236512	0.241086	Cortex
0.00109665	0.0038575	0.101	0.086	0.549419	DS_vs_WT	Tnc	0.00125028	FALSE	Layer_2-4_ExN	0.325848	0.329398	Cortex
1.08161e-08	0.00378072	0.747	0.701	5.41886e-06	DS_vs_WT	Cnr1	1.87691e-08	FALSE	Layer_2-4_ExN	6.62407	6.64408	Cortex
4.27265e-11	0.00370144	0.359	0.315	2.1406e-08	DS_vs_WT	Hras	8.92341e-11	FALSE	Layer_2-4_ExN	1.24657	1.25234	Cortex
1.61699e-09	0.00213701	0.116	0.092	8.10112e-07	DS_vs_WT	Aldh2	2.91305e-09	FALSE	Layer_2-4_ExN	0.31296	0.314906	Cortex
1.55372e-07	0.00204378	0.163	0.138	7.78413e-05	DS_vs_WT	Txnrd3	2.3505e-07	FALSE	Layer_2-4_ExN	0.505522	0.507656	Cortex
3.11887e-05	0.000204866	0.067	0.054	0.0156256	DS_vs_WT	Traf2	4.11203e-05	FALSE	Layer_2-4_ExN	0.176979	0.177146	Cortex
1	0	1	1	1	DS_vs_WT	Unnamed: 0	1	FALSE	Layer_2-4_ExN	1.16089e-177	1.12055e-178	Cortex
2.611e-08	-4.22712e-05	0.194	0.164	1.30811e-05	DS_vs_WT	Wnt7b	4.27913e-08	FALSE	Layer_2-4_ExN	0.819006	0.818953	Cortex
1.01889e-07	-0.000524043	0.105	0.085	5.10465e-05	DS_vs_WT	Wnt7a	1.59244e-07	FALSE	Layer_2-4_ExN	0.300118	0.299645	Cortex
4.13203e-13	-0.00166963	0.676	0.621	2.07015e-10	DS_vs_WT	Rbfox3	1.01579e-12	FALSE	Layer_2-4_ExN	4.08368	4.0778	Cortex
4.36785e-11	-0.00195926	0.262	0.224	2.18829e-08	DS_vs_WT	Nfkb1	8.96359e-11	FALSE	Layer_2-4_ExN	0.853852	0.851336	Cortex
4.34768e-11	-0.00270229	0.247	0.209	2.17819e-08	DS_vs_WT	Cx3cl1	8.96359e-11	FALSE	Layer_2-4_ExN	0.840256	0.836812	Cortex
0.000766734	-0.00310293	0.084	0.071	0.384134	DS_vs_WT	Arx	0.000887006	FALSE	Layer_2-4_ExN	0.243095	0.240424	Cortex
0.00169574	-0.00353277	0.05	0.042	0.849565	DS_vs_WT	Il1a	0.00190233	FALSE	Layer_2-4_ExN	0.14218	0.139387	Cortex
1.78668e-11	-0.00769884	0.149	0.12	8.95128e-09	DS_vs_WT	Cdkn1a	3.83325e-11	FALSE	Layer_2-4_ExN	0.454004	0.446266	Cortex
0.00136636	-0.00849718	0.072	0.063	0.684544	DS_vs_WT	Mif	0.00154287	FALSE	Layer_2-4_ExN	0.20114	0.194086	Cortex
1.37651e-08	-0.00955776	0.06	0.04	6.8963e-06	DS_vs_WT	Nr4a2	2.33709e-08	FALSE	Layer_2-4_ExN	0.197077	0.189173	Cortex
0.0691786	-0.00978315	0.054	0.05	1	DS_vs_WT	Sall1	0.070676	FALSE	Layer_2-4_ExN	0.148371	0.14061	Cortex
0.000180526	-0.00993715	0.143	0.127	0.0904435	DS_vs_WT	Clu	0.000218483	FALSE	Layer_2-4_ExN	0.462426	0.452387	Cortex
0.0129715	-0.0105791	0.149	0.136	1	DS_vs_WT	Lhx6	0.0137896	FALSE	Layer_2-4_ExN	0.503032	0.49205	Cortex
7.85185e-10	-0.0114095	0.102	0.081	3.93378e-07	DS_vs_WT	Psmb10	1.48243e-09	FALSE	Layer_2-4_ExN	0.278637	0.268565	Cortex
0.000129573	-0.0142162	0.134	0.118	0.0649158	DS_vs_WT	Axin2	0.0001601	FALSE	Layer_2-4_ExN	0.420343	0.406416	Cortex
0.026568	-0.0153193	0.097	0.09	1	DS_vs_WT	Slc17a6	0.0278669	FALSE	Layer_2-4_ExN	0.298896	0.285177	Cortex
0.589798	-0.0182361	0.058	0.059	1	DS_vs_WT	Stat2	0.592308	FALSE	Layer_2-4_ExN	0.189903	0.174957	Cortex
0.0517557	-0.0188735	0.051	0.049	1	DS_vs_WT	Npc2	0.0533378	FALSE	Layer_2-4_ExN	0.154012	0.139013	Cortex
1.76462e-06	-0.0190241	0.077	0.064	0.000884074	DS_vs_WT	Mavs	2.50873e-06	FALSE	Layer_2-4_ExN	0.218141	0.202183	Cortex
7.38617e-08	-0.0190772	0.328	0.296	3.70047e-05	DS_vs_WT	Plk3	1.16209e-07	FALSE	Layer_2-4_ExN	1.26319	1.23346	Cortex
4.33908e-05	-0.0198227	0.062	0.054	0.0217388	DS_vs_WT	Nox1	5.6265e-05	FALSE	Layer_2-4_ExN	0.175972	0.159925	Cortex
0.259564	-0.0199272	0.065	0.064	1	DS_vs_WT	Lix1	0.261783	FALSE	Layer_2-4_ExN	0.214664	0.198002	Cortex
1.67639e-05	-0.0201461	0.283	0.26	0.00839873	DS_vs_WT	Hif1a	2.26074e-05	FALSE	Layer_2-4_ExN	1.04108	1.01277	Cortex
0.00608648	-0.0224747	0.198	0.187	1	DS_vs_WT	Npc1	0.0066194	FALSE	Layer_2-4_ExN	0.686195	0.66013	Cortex
4.31532e-09	-0.0225929	0.062	0.05	2.16197e-06	DS_vs_WT	Cxcl5	7.60011e-09	FALSE	Layer_2-4_ExN	0.169979	0.151799	Cortex
1.22166e-08	-0.0236752	0.086	0.07	6.12053e-06	DS_vs_WT	Pecam1	2.10447e-08	FALSE	Layer_2-4_ExN	0.244965	0.224701	Cortex
2.15164e-13	-0.0268939	0.338	0.299	1.07797e-10	DS_vs_WT	Lrp6	5.34512e-13	FALSE	Layer_2-4_ExN	1.24023	1.19886	Cortex
1.60317e-09	-0.0288942	0.212	0.186	8.03187e-07	DS_vs_WT	Sp1	2.91305e-09	FALSE	Layer_2-4_ExN	0.698891	0.665204	Cortex
0.135142	-0.0289926	0.05	0.052	1	DS_vs_WT	Irf2	0.136882	FALSE	Layer_2-4_ExN	0.158172	0.135129	Cortex
0.0495906	-0.0310302	0.097	0.095	1	DS_vs_WT	Pex1	0.0515567	FALSE	Layer_2-4_ExN	0.306695	0.27889	Cortex
6.3024e-09	-0.0312972	0.268	0.239	3.1575e-06	DS_vs_WT	Nos1	1.10175e-08	FALSE	Layer_2-4_ExN	1.00444	0.961423	Cortex
2.51134e-12	-0.0333322	0.291	0.255	1.25818e-09	DS_vs_WT	Cux1	5.75413e-12	FALSE	Layer_2-4_ExN	1.13131	1.08263	Cortex
0.00228557	-0.0353912	0.443	0.426	1	DS_vs_WT	Anxa6	0.00254431	FALSE	Layer_2-4_ExN	2.243	2.16441	Cortex
1.82187e-19	-0.0381419	0.404	0.353	9.12759e-17	DS_vs_WT	Psen1	6.14232e-19	FALSE	Layer_2-4_ExN	1.63319	1.56448	Cortex
0.0543708	-0.0454724	0.098	0.098	1	DS_vs_WT	Foxo1	0.0557892	FALSE	Layer_2-4_ExN	0.377623	0.334878	Cortex
0.00330947	-0.0477348	0.164	0.158	1	DS_vs_WT	Sorl1	0.0036497	FALSE	Layer_2-4_ExN	0.61672	0.564103	Cortex
0.00618905	-0.0516902	0.08	0.081	1	DS_vs_WT	Gsr	0.00670007	FALSE	Layer_2-4_ExN	0.267767	0.223149	Cortex
0.000314834	-0.0541147	0.093	0.092	0.157732	DS_vs_WT	Smurf2	0.000375257	FALSE	Layer_2-4_ExN	0.293123	0.245517	Cortex
1.06226e-11	-0.0569327	0.25	0.223	5.32191e-09	DS_vs_WT	Psmb2	2.29993e-11	FALSE	Layer_2-4_ExN	0.908878	0.835016	Cortex
1.52553e-07	-0.0569673	0.054	0.05	7.64293e-05	DS_vs_WT	Tspo	2.32275e-07	FALSE	Layer_2-4_ExN	0.179877	0.134195	Cortex
0.000166148	-0.0570029	0.189	0.182	0.08324	DS_vs_WT	Mettl3	0.000202118	FALSE	Layer_2-4_ExN	0.66382	0.599362	Cortex
0.0776047	-0.0607254	0.086	0.094	1	DS_vs_WT	Topbp1	0.0789428	FALSE	Layer_2-4_ExN	0.339181	0.283983	Cortex
0.00578685	-0.0607974	0.063	0.068	1	DS_vs_WT	Myd88	0.00632267	FALSE	Layer_2-4_ExN	0.228511	0.177815	Cortex
0.0130566	-0.0626485	0.108	0.113	1	DS_vs_WT	Traf6	0.0138178	FALSE	Layer_2-4_ExN	0.390727	0.331628	Cortex
0.00101547	-0.0637404	0.229	0.226	0.508748	DS_vs_WT	Crebbp	0.00116335	FALSE	Layer_2-4_ExN	0.828025	0.749018	Cortex
3.50795e-05	-0.0649057	0.055	0.059	0.0175749	DS_vs_WT	Casp7	4.59932e-05	FALSE	Layer_2-4_ExN	0.183771	0.131694	Cortex
0.0102504	-0.0658084	0.052	0.064	1	DS_vs_WT	Dynll1	0.0109461	FALSE	Layer_2-4_ExN	0.208256	0.154379	Cortex
5.59405e-08	-0.0664999	0.404	0.383	2.80262e-05	DS_vs_WT	Sars	8.98093e-08	FALSE	Layer_2-4_ExN	1.77031	1.64552	Cortex
0.014029	-0.0711811	0.16	0.164	1	DS_vs_WT	Rad50	0.0147805	FALSE	Layer_2-4_ExN	0.601115	0.524035	Cortex
0.000392571	-0.0731004	0.305	0.302	0.196678	DS_vs_WT	Arf1	0.000463233	FALSE	Layer_2-4_ExN	1.31016	1.19602	Cortex
2.91848e-22	-0.0740919	0.822	0.769	1.46216e-19	DS_vs_WT	Dtx4	1.07619e-21	FALSE	Layer_2-4_ExN	7.26497	6.85123	Cortex
0.000479898	-0.0759932	0.155	0.157	0.240429	DS_vs_WT	Atf6	0.000563463	FALSE	Layer_2-4_ExN	0.546587	0.467229	Cortex
0.0505715	-0.0766676	0.111	0.123	1	DS_vs_WT	Gad1	0.052346	FALSE	Layer_2-4_ExN	0.467136	0.391205	Cortex
3.87209e-05	-0.0786929	0.045	0.054	0.0193992	DS_vs_WT	Lifr	5.04869e-05	FALSE	Layer_2-4_ExN	0.171889	0.109679	Cortex
1.6138e-05	-0.0804085	0.081	0.083	0.00808516	DS_vs_WT	Syt9	2.18884e-05	FALSE	Layer_2-4_ExN	0.299628	0.229175	Cortex
0.00095316	-0.0812971	0.16	0.157	0.477533	DS_vs_WT	Otx1	0.0010973	FALSE	Layer_2-4_ExN	0.757781	0.661468	Cortex
3.21177e-33	-0.0825984	0.488	0.425	1.60909e-30	DS_vs_WT	Gsk3b	2.22934e-32	FALSE	Layer_2-4_ExN	2.16549	1.98934	Cortex
0.00708841	-0.0847508	0.328	0.357	1	DS_vs_WT	Ythdc1	0.00763866	FALSE	Layer_2-4_ExN	1.44115	1.30188	Cortex
0.00286508	-0.0872234	0.093	0.108	1	DS_vs_WT	Prkaa1	0.00317445	FALSE	Layer_2-4_ExN	0.355047	0.27555	Cortex
0.000348353	-0.0913447	0.089	0.094	0.174525	DS_vs_WT	Aldh1l1	0.000413122	FALSE	Layer_2-4_ExN	0.342717	0.260338	Cortex
0.0102135	-0.092985	0.128	0.144	1	DS_vs_WT	Rars	0.0109461	FALSE	Layer_2-4_ExN	0.530415	0.434888	Cortex
7.34984e-07	-0.0974527	0.036	0.054	0.000368227	DS_vs_WT	Pdk3	1.07072e-06	FALSE	Layer_2-4_ExN	0.166584	0.090385	Cortex
2.15577e-05	-0.0976485	0.052	0.071	0.0108004	DS_vs_WT	Ythdc2	2.89069e-05	FALSE	Layer_2-4_ExN	0.222859	0.142829	Cortex
0.000655247	-0.0999997	0.107	0.118	0.328279	DS_vs_WT	Sirt1	0.000765536	FALSE	Layer_2-4_ExN	0.425788	0.330308	Cortex
0.000737892	-0.102014	0.11	0.124	0.369684	DS_vs_WT	Aldh9a1	0.000857845	TRUE	Layer_2-4_ExN	0.427803	0.330328	Cortex
0.0011765	-0.104389	0.113	0.127	0.589427	DS_vs_WT	Fgfr2	0.00133488	TRUE	Layer_2-4_ExN	0.471937	0.369194	Cortex
4.19585e-13	-0.106897	0.211	0.197	2.10212e-10	DS_vs_WT	Mx1	1.02085e-12	TRUE	Layer_2-4_ExN	0.768547	0.642243	Cortex
1.29772e-06	-0.107005	0.279	0.28	0.000650157	DS_vs_WT	Otud4	1.85613e-06	TRUE	Layer_2-4_ExN	1.12104	0.969417	Cortex
0.000199102	-0.109567	0.197	0.201	0.0997501	DS_vs_WT	Sox5	0.000238518	TRUE	Layer_2-4_ExN	0.91026	0.770555	Cortex
0.000141887	-0.112125	0.101	0.122	0.0710852	DS_vs_WT	Braf	0.000173499	TRUE	Layer_2-4_ExN	0.402548	0.297671	Cortex
9.1987e-06	-0.113975	0.084	0.111	0.00460855	DS_vs_WT	Trp53bp1	1.277e-05	TRUE	Layer_2-4_ExN	0.364663	0.261001	Cortex
4.39335e-05	-0.115051	0.129	0.143	0.0220107	DS_vs_WT	Sod2	5.66575e-05	TRUE	Layer_2-4_ExN	0.503422	0.388184	Cortex
5.19008e-07	-0.11712	0.055	0.074	0.000260023	DS_vs_WT	Mag	7.70352e-07	TRUE	Layer_2-4_ExN	0.242849	0.145939	Cortex
3.08135e-05	-0.119338	0.405	0.417	0.0154376	DS_vs_WT	Mapk14	4.08539e-05	TRUE	Layer_2-4_ExN	1.86551	1.63801	Cortex
0.000130632	-0.122978	0.182	0.201	0.0654468	DS_vs_WT	Casp3	0.000160569	TRUE	Layer_2-4_ExN	0.742225	0.599868	Cortex
1.72439e-12	-0.133282	0.04	0.072	8.63918e-10	DS_vs_WT	Zhx2	3.98976e-12	TRUE	Layer_2-4_ExN	0.215677	0.1084	Cortex
1.87177e-09	-0.142395	0.052	0.077	9.37756e-07	DS_vs_WT	Kras	3.3465e-09	TRUE	Layer_2-4_ExN	0.255028	0.137073	Cortex
1.58245e-09	-0.142615	0.352	0.356	7.92808e-07	DS_vs_WT	Mecp2	2.91305e-09	TRUE	Layer_2-4_ExN	1.55811	1.31733	Cortex
2.31474e-08	-0.143438	0.052	0.079	1.15969e-05	DS_vs_WT	Unc5d	3.84704e-08	TRUE	Layer_2-4_ExN	0.295415	0.172816	Cortex
1.47503e-07	-0.146097	0.064	0.088	7.38989e-05	DS_vs_WT	Creb1	2.26043e-07	TRUE	Layer_2-4_ExN	0.317443	0.190563	Cortex
0.000107092	-0.148482	0.403	0.426	0.0536531	DS_vs_WT	Nlgn1	0.000134435	TRUE	Layer_2-4_ExN	2.49081	2.1494	Cortex
2.49273e-10	-0.155218	0.195	0.206	1.24886e-07	DS_vs_WT	Gba	4.86185e-10	TRUE	Layer_2-4_ExN	0.771933	0.59119	Cortex
2.54792e-08	-0.157439	0.077	0.11	1.27651e-05	DS_vs_WT	Cntn6	4.20497e-08	TRUE	Layer_2-4_ExN	0.463041	0.311785	Cortex
5.36113e-11	-0.15879	0.616	0.616	2.68593e-08	DS_vs_WT	Grin2b	1.09071e-10	TRUE	Layer_2-4_ExN	4.45847	3.88956	Cortex
2.00265e-08	-0.160842	0.09	0.117	1.00333e-05	DS_vs_WT	Cck	3.35195e-08	TRUE	Layer_2-4_ExN	0.413492	0.264373	Cortex
6.09456e-16	-0.165941	0.753	0.746	3.05337e-13	DS_vs_WT	Eif4g1	1.82065e-15	TRUE	Layer_2-4_ExN	5.90439	5.15421	Cortex
8.8519e-10	-0.166898	0.079	0.113	4.4348e-07	DS_vs_WT	Wtap	1.65797e-09	TRUE	Layer_2-4_ExN	0.39213	0.240048	Cortex
1.12239e-06	-0.172502	0.238	0.272	0.000562317	DS_vs_WT	Jak2	1.61515e-06	TRUE	Layer_2-4_ExN	1.15679	0.913725	Cortex
2.12741e-13	-0.176925	0.427	0.435	1.06583e-10	DS_vs_WT	Dlg4	5.34116e-13	TRUE	Layer_2-4_ExN	2.06321	1.70967	Cortex
4.42784e-07	-0.179206	0.215	0.247	0.000221835	DS_vs_WT	Itch	6.61374e-07	TRUE	Layer_2-4_ExN	1.0011	0.767346	Cortex
7.85494e-12	-0.190471	0.149	0.168	3.93532e-09	DS_vs_WT	Cxcl13	1.73249e-11	TRUE	Layer_2-4_ExN	0.631166	0.429423	Cortex
2.01631e-13	-0.194472	0.287	0.29	1.01017e-10	DS_vs_WT	Slc17a7	5.11666e-13	TRUE	Layer_2-4_ExN	1.38946	1.08813	Cortex
9.01714e-18	-0.194741	0.051	0.093	4.51759e-15	DS_vs_WT	Ogt	2.7637e-17	TRUE	Layer_2-4_ExN	0.304121	0.13945	Cortex
9.44294e-11	-0.207931	0.363	0.392	4.73091e-08	DS_vs_WT	Jak1	1.87272e-10	TRUE	Layer_2-4_ExN	1.92146	1.52933	Cortex
2.85784e-12	-0.218775	0.191	0.18	1.43178e-09	DS_vs_WT	Npy	6.48511e-12	TRUE	Layer_2-4_ExN	1.23566	0.921089	Cortex
5.50117e-14	-0.219982	0.197	0.226	2.75609e-11	DS_vs_WT	Wars	1.42668e-13	TRUE	Layer_2-4_ExN	0.855849	0.593388	Cortex
5.46069e-12	-0.226237	0.201	0.254	2.7358e-09	DS_vs_WT	Pdia3	1.22735e-11	TRUE	Layer_2-4_ExN	1.05838	0.75963	Cortex
1.75869e-14	-0.24039	0.106	0.152	8.81104e-12	DS_vs_WT	Gabra1	4.61168e-14	TRUE	Layer_2-4_ExN	0.595012	0.350204	Cortex
7.32384e-17	-0.245039	0.547	0.581	3.66924e-14	DS_vs_WT	Syn1	2.21593e-16	TRUE	Layer_2-4_ExN	3.66699	2.93797	Cortex
4.17613e-08	-0.25184	0.254	0.295	2.09224e-05	DS_vs_WT	Cux2	6.79701e-08	TRUE	Layer_2-4_ExN	1.93021	1.46086	Cortex
6.95821e-18	-0.269957	0.459	0.491	3.48606e-15	DS_vs_WT	Lamp1	2.18952e-17	TRUE	Layer_2-4_ExN	2.91401	2.24606	Cortex
1.18293e-20	-0.276402	0.329	0.362	5.92649e-18	DS_vs_WT	Fto	4.16675e-20	TRUE	Layer_2-4_ExN	1.67141	1.20564	Cortex
9.34852e-20	-0.27716	0.124	0.175	4.68361e-17	DS_vs_WT	Ptprd	3.24449e-19	TRUE	Layer_2-4_ExN	0.664574	0.37363	Cortex
2.03542e-22	-0.285284	0.131	0.19	1.01975e-19	DS_vs_WT	Cr1l	7.74774e-22	TRUE	Layer_2-4_ExN	0.679642	0.378281	Cortex
1.05954e-23	-0.303685	0.094	0.154	5.30827e-21	DS_vs_WT	Csnk1a1	4.46518e-23	TRUE	Layer_2-4_ExN	0.602589	0.298387	Cortex
6.34052e-23	-0.325867	0.171	0.235	3.1766e-20	DS_vs_WT	Mapk1	2.49394e-22	TRUE	Layer_2-4_ExN	0.95801	0.562137	Cortex
8.19207e-24	-0.342853	0.231	0.289	4.10423e-21	DS_vs_WT	Rac1	3.51514e-23	TRUE	Layer_2-4_ExN	1.33933	0.844517	Cortex
1.00349e-27	-0.362231	0.123	0.198	5.0275e-25	DS_vs_WT	Vcan	5.26276e-27	TRUE	Layer_2-4_ExN	0.893254	0.472877	Cortex
1.13657e-28	-0.381114	0.221	0.314	5.69421e-26	DS_vs_WT	Fabp7	6.23791e-28	TRUE	Layer_2-4_ExN	1.51594	0.93185	Cortex
1.11951e-62	-0.390557	0.75	0.775	5.60873e-60	DS_vs_WT	Apc	2.64204e-61	TRUE	Layer_2-4_ExN	6.87123	5.00445	Cortex
4.01962e-28	-0.398185	0.166	0.235	2.01383e-25	DS_vs_WT	Cd47	2.15598e-27	TRUE	Layer_2-4_ExN	1.08326	0.580804	Cortex
8.32502e-41	-0.441405	0.197	0.29	4.17084e-38	DS_vs_WT	Nras	9.35574e-40	TRUE	Layer_2-4_ExN	1.28532	0.68295	Cortex
2.96465e-40	-0.459251	0.328	0.392	1.48529e-37	DS_vs_WT	Dcx	3.04199e-39	TRUE	Layer_2-4_ExN	2.35164	1.43786	Cortex
1.96854e-43	-0.49501	0.279	0.375	9.8624e-41	DS_vs_WT	Mef2c	2.68088e-42	TRUE	Layer_2-4_ExN	2.15118	1.23594	Cortex
7.53451e-58	-0.546032	0.389	0.485	3.77479e-55	DS_vs_WT	Tnr	1.2701e-56	TRUE	Layer_2-4_ExN	3.01432	1.74941	Cortex
1.04855e-73	-0.578704	0.385	0.537	5.25325e-71	DS_vs_WT	Hsp90b1	2.74954e-72	TRUE	Layer_2-4_ExN	3.33112	1.89996	Cortex
3.20868e-81	-0.694134	0.17	0.297	1.60755e-78	DS_vs_WT	Map2	1.08179e-79	TRUE	Layer_2-4_ExN	1.53072	0.56419	Cortex
p_val	avg_log2FC	pct.1	pct.2	p_val_adj	comparison	gene	FDR	sig	celltype	exp.1	exp.2	Cortex
3.43588e-84	0.875467	0.483	0.201	1.72137e-81	DS_vs_WT	Col1a1	5.0851e-82	TRUE	Layer_2-5_ExN	0.473387	1.70308	Cortex
3.47466e-101	0.678447	0.943	0.824	1.74081e-98	DS_vs_WT	Dvl1	1.0285e-98	TRUE	Layer_2-5_ExN	4.08749	7.14209	Cortex
2.85096e-50	0.609235	0.832	0.724	1.42833e-47	DS_vs_WT	Pou3f3	9.37649e-49	TRUE	Layer_2-5_ExN	3.43595	5.76682	Cortex
3.10804e-52	0.581599	0.612	0.377	1.55713e-49	DS_vs_WT	Igfbp2	1.31426e-50	TRUE	Layer_2-5_ExN	1.02498	2.0304	Cortex
1.32249e-46	0.565631	0.624	0.401	6.62569e-44	DS_vs_WT	Cdkn1c	3.91458e-45	TRUE	Layer_2-5_ExN	1.23114	2.30216	Cortex
3.13736e-31	0.421614	0.499	0.313	1.57182e-28	DS_vs_WT	Ldlr	6.19105e-30	TRUE	Layer_2-5_ExN	0.76985	1.37058	Cortex
4.13853e-56	0.416903	0.992	0.969	2.0734e-53	DS_vs_WT	Ncan	2.45001e-54	TRUE	Layer_2-5_ExN	12.6976	17.2871	Cortex
5.32219e-38	0.411241	0.85	0.702	2.66642e-35	DS_vs_WT	Vars	1.21182e-36	TRUE	Layer_2-5_ExN	2.70748	3.93031	Cortex
2.89128e-51	0.402987	0.999	0.994	1.44853e-48	DS_vs_WT	App	1.06977e-49	TRUE	Layer_2-5_ExN	27.8755	37.1805	Cortex
7.35971e-27	0.35664	0.6	0.421	3.68722e-24	DS_vs_WT	Vars2	1.14657e-25	TRUE	Layer_2-5_ExN	1.11976	1.71422	Cortex
1.3228e-39	0.342408	0.975	0.92	6.62724e-37	DS_vs_WT	Nlgn2	3.55954e-38	TRUE	Layer_2-5_ExN	7.33279	9.5649	Cortex
1.07096e-11	0.329096	0.351	0.246	5.36552e-09	DS_vs_WT	Mdga1	5.76372e-11	TRUE	Layer_2-5_ExN	0.829211	1.2979	Cortex
2.3694e-14	0.306197	0.757	0.671	1.18707e-11	DS_vs_WT	Myc	1.75336e-13	TRUE	Layer_2-5_ExN	2.97085	3.90973	Cortex
6.20788e-28	0.293923	0.98	0.957	3.11015e-25	DS_vs_WT	Lrp1	1.02085e-26	TRUE	Layer_2-5_ExN	8.80446	11.02	Cortex
1.96336e-21	0.293892	0.659	0.5	9.83644e-19	DS_vs_WT	Grin1	2.07555e-20	TRUE	Layer_2-5_ExN	1.51457	2.08271	Cortex
2.75763e-23	0.293161	0.281	0.144	1.38157e-20	DS_vs_WT	Aif1	3.54895e-22	TRUE	Layer_2-5_ExN	0.286788	0.57673	Cortex
7.58234e-20	0.282936	0.596	0.44	3.79875e-17	DS_vs_WT	Dyrk1a	7.01367e-19	TRUE	Layer_2-5_ExN	1.31648	1.81839	Cortex
5.1056e-18	0.258053	0.854	0.748	2.55791e-15	DS_vs_WT	Lmnb1	4.57957e-17	TRUE	Layer_2-5_ExN	3.45668	4.32959	Cortex
9.24735e-14	0.251328	0.683	0.563	4.63292e-11	DS_vs_WT	Rcan1	6.22095e-13	TRUE	Layer_2-5_ExN	1.85121	2.3938	Cortex
1.5395e-16	0.241387	0.413	0.278	7.7129e-14	DS_vs_WT	Ifnar1	1.30198e-15	TRUE	Layer_2-5_ExN	0.666018	0.969447	Cortex
3.02696e-15	0.241351	0.574	0.438	1.51651e-12	DS_vs_WT	Csf2ra	2.42157e-14	TRUE	Layer_2-5_ExN	1.22853	1.63434	Cortex
1.25211e-25	0.218541	0.177	0.066	6.27309e-23	DS_vs_WT	Col1a2	1.68466e-24	TRUE	Layer_2-5_ExN	0.133238	0.318586	Cortex
2.55133e-14	0.211781	0.318	0.203	1.27822e-11	DS_vs_WT	Ikbkg	1.84194e-13	TRUE	Layer_2-5_ExN	0.439197	0.666759	Cortex
3.22649e-07	0.204349	0.306	0.226	0.000161647	DS_vs_WT	Wnt7b	9.84579e-07	TRUE	Layer_2-5_ExN	0.619335	0.865743	Cortex
5.99725e-13	0.2039	0.185	0.099	3.00462e-10	DS_vs_WT	Acads	3.6983e-12	TRUE	Layer_2-5_ExN	0.202631	0.3852	Cortex
8.35358e-08	0.191383	0.482	0.388	4.18514e-05	DS_vs_WT	Dkk3	2.90901e-07	TRUE	Layer_2-5_ExN	1.36782	1.70371	Cortex
4.70488e-13	0.186404	0.213	0.121	2.35715e-10	DS_vs_WT	Tapbp	3.02749e-12	TRUE	Layer_2-5_ExN	0.23888	0.409752	Cortex
7.41096e-11	0.177177	0.365	0.261	3.71289e-08	DS_vs_WT	Tyk2	3.53814e-10	TRUE	Layer_2-5_ExN	0.595168	0.803608	Cortex
1.04814e-06	0.175773	0.789	0.765	0.000525116	DS_vs_WT	Gabbr1	2.98316e-06	TRUE	Layer_2-5_ExN	3.55464	4.14478	Cortex
7.41025e-20	0.174818	0.134	0.048	3.71254e-17	DS_vs_WT	Kif7	7.01367e-19	TRUE	Layer_2-5_ExN	0.0915074	0.232118	Cortex
7.71936e-12	0.169782	0.443	0.329	3.8674e-09	DS_vs_WT	Qars	4.23135e-11	TRUE	Layer_2-5_ExN	0.83067	1.0593	Cortex
2.72485e-20	0.168898	0.321	0.195	1.36515e-17	DS_vs_WT	Fbln1	2.75556e-19	TRUE	Layer_2-5_ExN	0.548906	0.74128	Cortex
1.60713e-10	0.168278	0.378	0.275	8.05172e-08	DS_vs_WT	Ggt7	7.43298e-10	TRUE	Layer_2-5_ExN	0.633197	0.83525	Cortex
2.93702e-12	0.166595	0.614	0.494	1.47145e-09	DS_vs_WT	Vegfa	1.6403e-11	TRUE	Layer_2-5_ExN	1.59526	1.91294	Cortex
8.87612e-10	0.165143	0.982	0.954	4.44693e-07	DS_vs_WT	Satb2	3.75333e-09	TRUE	Layer_2-5_ExN	21.0545	23.7292	Cortex
5.37705e-16	0.159438	0.169	0.082	2.6939e-13	DS_vs_WT	Ifnar2	4.42113e-15	TRUE	Layer_2-5_ExN	0.164971	0.3011	Cortex
5.89017e-11	0.149287	0.579	0.466	2.95098e-08	DS_vs_WT	Hsf1	2.95507e-10	TRUE	Layer_2-5_ExN	1.32904	1.58296	Cortex
6.63918e-11	0.137116	0.451	0.345	3.32623e-08	DS_vs_WT	Prdx5	3.27533e-10	TRUE	Layer_2-5_ExN	0.842632	1.02635	Cortex
3.58292e-08	0.132814	0.127	0.069	1.79504e-05	DS_vs_WT	Alkbh5	1.29335e-07	TRUE	Layer_2-5_ExN	0.132809	0.242046	Cortex
2.93564e-12	0.130078	0.743	0.631	1.47075e-09	DS_vs_WT	Ikbkb	1.6403e-11	TRUE	Layer_2-5_ExN	2.11974	2.4141	Cortex
1.45049e-07	0.127449	0.549	0.458	7.26696e-05	DS_vs_WT	Pink1	4.8241e-07	TRUE	Layer_2-5_ExN	1.3063	1.51931	Cortex
1.40342e-07	0.126068	0.224	0.153	7.03114e-05	DS_vs_WT	H2afx	4.7206e-07	TRUE	Layer_2-5_ExN	0.305837	0.425079	Cortex
1.95076e-08	0.122297	0.243	0.168	9.7733e-06	DS_vs_WT	Lrp5	7.40288e-08	TRUE	Layer_2-5_ExN	0.372935	0.494393	Cortex
2.7025e-06	0.116767	0.276	0.207	0.00135395	DS_vs_WT	Trp53	7.27219e-06	TRUE	Layer_2-5_ExN	0.455398	0.578091	Cortex
4.72079e-11	0.114912	0.455	0.352	2.36512e-08	DS_vs_WT	Grip1	2.40923e-10	TRUE	Layer_2-5_ExN	0.930205	1.09024	Cortex
2.53408e-08	0.114903	0.15	0.089	1.26957e-05	DS_vs_WT	Fzd8	9.49477e-08	TRUE	Layer_2-5_ExN	0.184842	0.283067	Cortex
0.0064208	0.109629	0.253	0.21	1	DS_vs_WT	Nrf1	0.00989873	TRUE	Layer_2-5_ExN	0.456687	0.571694	Cortex
6.76284e-08	0.105565	0.118	0.065	3.38818e-05	DS_vs_WT	Osmr	2.38309e-07	TRUE	Layer_2-5_ExN	0.127729	0.213341	Cortex
7.51391e-07	0.104492	0.133	0.08	0.000376447	DS_vs_WT	Sod1	2.2021e-06	TRUE	Layer_2-5_ExN	0.155533	0.242331	Cortex
1.7549e-06	0.103428	0.185	0.127	0.000879207	DS_vs_WT	Ptch1	4.85469e-06	TRUE	Layer_2-5_ExN	0.263773	0.3577	Cortex
2.7309e-05	0.100373	0.325	0.258	0.0136818	DS_vs_WT	Gpx1	6.36493e-05	TRUE	Layer_2-5_ExN	0.577971	0.691665	Cortex
0.000280513	0.0985315	0.124	0.083	0.140537	DS_vs_WT	Cldn5	0.000580641	FALSE	Layer_2-5_ExN	0.17529	0.258363	Cortex
0.000380172	0.0959909	0.2	0.151	0.190466	DS_vs_WT	Tle1	0.000760343	FALSE	Layer_2-5_ExN	0.334366	0.426169	Cortex
2.30338e-07	0.0954849	0.105	0.057	0.0001154	DS_vs_WT	Notch2	7.41089e-07	FALSE	Layer_2-5_ExN	0.11715	0.193591	Cortex
4.88737e-05	0.094679	0.421	0.352	0.0244857	DS_vs_WT	Optn	0.000111282	FALSE	Layer_2-5_ExN	0.897296	1.02598	Cortex
0.00195344	0.0929181	0.343	0.289	0.978673	DS_vs_WT	Rnf5	0.00354735	FALSE	Layer_2-5_ExN	0.647645	0.757255	Cortex
1.41921e-09	0.0927076	0.744	0.649	7.11025e-07	DS_vs_WT	Smurf1	5.91672e-09	FALSE	Layer_2-5_ExN	2.38155	2.60598	Cortex
4.77705e-08	0.0916086	0.063	0.025	2.3933e-05	DS_vs_WT	Cspg4	1.70362e-07	FALSE	Layer_2-5_ExN	0.0430359	0.111415	Cortex
5.24369e-07	0.0898606	0.2	0.138	0.000262709	DS_vs_WT	Irf9	1.55213e-06	FALSE	Layer_2-5_ExN	0.293849	0.377001	Cortex
0.000161884	0.0879575	0.214	0.162	0.081104	DS_vs_WT	Sirt3	0.000349764	FALSE	Layer_2-5_ExN	0.337608	0.421696	Cortex
2.91941e-10	0.0859921	0.252	0.176	1.46263e-07	DS_vs_WT	Gria4	1.28977e-09	FALSE	Layer_2-5_ExN	0.446919	0.535785	Cortex
0.000233712	0.0834476	0.127	0.086	0.11709	DS_vs_WT	Rad9a	0.000490629	FALSE	Layer_2-5_ExN	0.166005	0.235438	Cortex
1.504e-05	0.0832544	0.724	0.653	0.00753503	DS_vs_WT	Bcl2l2	3.6792e-05	FALSE	Layer_2-5_ExN	2.25463	2.44797	Cortex
0.000309938	0.0814544	0.887	0.842	0.155279	DS_vs_WT	Mtor	0.000628368	FALSE	Layer_2-5_ExN	4.40671	4.72076	Cortex
0.00101697	0.0779436	0.237	0.189	0.509502	DS_vs_WT	Mdm2	0.00190521	FALSE	Layer_2-5_ExN	0.380807	0.457459	Cortex
2.5145e-07	0.0767961	0.097	0.053	0.000125976	DS_vs_WT	Mdk	7.91799e-07	FALSE	Layer_2-5_ExN	0.103619	0.163958	Cortex
0.00815736	0.0760998	0.286	0.242	1	DS_vs_WT	Txnrd3	0.0122567	FALSE	Layer_2-5_ExN	0.548694	0.632578	Cortex
0.000930095	0.0757955	0.478	0.419	0.465977	DS_vs_WT	Nos1	0.0017648	FALSE	Layer_2-5_ExN	1.32914	1.45478	Cortex
3.63591e-07	0.0753383	0.178	0.122	0.000182159	DS_vs_WT	Irf3	1.09819e-06	FALSE	Layer_2-5_ExN	0.245639	0.312415	Cortex
1.18896e-07	0.0746167	0.075	0.037	5.95669e-05	DS_vs_WT	Fn1	4.0452e-07	FALSE	Layer_2-5_ExN	0.0841601	0.141709	Cortex
1.46393e-06	0.0744065	0.428	0.354	0.000733427	DS_vs_WT	Traf3	4.12688e-06	FALSE	Layer_2-5_ExN	0.879102	0.978558	Cortex
0.0206236	0.0733397	0.074	0.055	1	DS_vs_WT	Notch1	0.02866	FALSE	Layer_2-5_ExN	0.105674	0.163335	Cortex
5.20443e-07	0.0723389	0.447	0.371	0.000260742	DS_vs_WT	Gsto1	1.55213e-06	FALSE	Layer_2-5_ExN	1.00065	1.10352	Cortex
0.00194144	0.0704069	0.999	0.994	0.972663	DS_vs_WT	Mapt	0.00354733	FALSE	Layer_2-5_ExN	30.0154	31.5665	Cortex
0.00294559	0.0697195	0.146	0.109	1	DS_vs_WT	Fuca1	0.00506915	FALSE	Layer_2-5_ExN	0.208477	0.268312	Cortex
0.00484328	0.0694283	1	0.997	1	DS_vs_WT	Tubb3	0.00787699	FALSE	Layer_2-5_ExN	48.4663	50.905	Cortex
0.0422543	0.0628723	0.746	0.709	1	DS_vs_WT	Tle3	0.0568512	FALSE	Layer_2-5_ExN	3.38328	3.57853	Cortex
0.000386399	0.0623563	0.125	0.087	0.193586	DS_vs_WT	Ddit3	0.000767612	FALSE	Layer_2-5_ExN	0.156775	0.207869	Cortex
0.0502719	0.060295	0.105	0.082	1	DS_vs_WT	Rela	0.0658428	FALSE	Layer_2-5_ExN	0.151846	0.201006	Cortex
0.000154823	0.0580383	0.294	0.241	0.0775664	DS_vs_WT	Cux1	0.000339464	FALSE	Layer_2-5_ExN	0.589136	0.654369	Cortex
0.00548724	0.0562879	0.147	0.113	1	DS_vs_WT	Psmb10	0.00873238	FALSE	Layer_2-5_ExN	0.22643	0.275226	Cortex
0.00300295	0.0556147	0.839	0.795	1	DS_vs_WT	Rbfox3	0.005138	FALSE	Layer_2-5_ExN	4.22486	4.4302	Cortex
0.0281427	0.0552473	0.104	0.079	1	DS_vs_WT	Psmb5	0.0387453	FALSE	Layer_2-5_ExN	0.15812	0.203329	Cortex
4.65823e-09	0.055083	0.787	0.703	2.33377e-06	DS_vs_WT	Pld3	1.83845e-08	FALSE	Layer_2-5_ExN	3.19537	3.35864	Cortex
0.0002535	0.0532219	0.144	0.106	0.127003	DS_vs_WT	Sufu	0.000528422	FALSE	Layer_2-5_ExN	0.211175	0.25669	Cortex
0.00470562	0.052102	0.212	0.174	1	DS_vs_WT	Cd68	0.00769537	FALSE	Layer_2-5_ExN	0.348515	0.398106	Cortex
1.23867e-05	0.0499016	0.133	0.093	0.00620574	DS_vs_WT	Wnt3	3.10717e-05	FALSE	Layer_2-5_ExN	0.190077	0.23196	Cortex
0.0482805	0.0493963	0.125	0.1	1	DS_vs_WT	Prdx6	0.0635156	FALSE	Layer_2-5_ExN	0.184201	0.225449	Cortex
0.000753351	0.0469239	0.062	0.036	0.377429	DS_vs_WT	Ccr3	0.00143866	FALSE	Layer_2-5_ExN	0.0717099	0.107141	Cortex
2.69815e-10	0.0466376	0.424	0.342	1.35177e-07	DS_vs_WT	Nfkb1	1.22139e-09	FALSE	Layer_2-5_ExN	0.887069	0.949068	Cortex
0.00874512	0.0447504	0.387	0.344	1	DS_vs_WT	Npc1	0.0130735	FALSE	Layer_2-5_ExN	0.845001	0.903127	Cortex
0.000660576	0.0443844	0.148	0.112	0.330949	DS_vs_WT	Ccl8	0.00128638	FALSE	Layer_2-5_ExN	0.234362	0.272927	Cortex
0.414976	0.0430462	0.062	0.052	1	DS_vs_WT	Nr4a2	0.438689	FALSE	Layer_2-5_ExN	0.13049	0.164729	Cortex
0.0342986	0.0426804	0.123	0.098	1	DS_vs_WT	Mavs	0.0470018	FALSE	Layer_2-5_ExN	0.186027	0.221638	Cortex
0.00596892	0.0413003	0.114	0.087	1	DS_vs_WT	Cxcr4	0.00927881	FALSE	Layer_2-5_ExN	0.154182	0.187701	Cortex
0.00205894	0.0392621	0.523	0.473	1	DS_vs_WT	Hras	0.00363017	FALSE	Layer_2-5_ExN	1.30829	1.37197	Cortex
2.38031e-05	0.0380371	0.119	0.083	0.0119253	DS_vs_WT	Traf2	5.63657e-05	FALSE	Layer_2-5_ExN	0.17939	0.210898	Cortex
0.0129075	0.033315	0.07	0.05	1	DS_vs_WT	Ifi27	0.018914	FALSE	Layer_2-5_ExN	0.0950277	0.120609	Cortex
5.57765e-06	0.0283318	0.8	0.738	0.0027944	DS_vs_WT	Ep300	1.46105e-05	FALSE	Layer_2-5_ExN	3.25513	3.33952	Cortex
0.185805	0.0263553	0.08	0.065	1	DS_vs_WT	Gli2	0.209917	FALSE	Layer_2-5_ExN	0.123015	0.143719	Cortex
0.143241	0.0261011	0.867	0.844	1	DS_vs_WT	Cnr1	0.166926	FALSE	Layer_2-5_ExN	6.05872	6.18759	Cortex
0.579343	0.0237698	0.119	0.108	1	DS_vs_WT	Crym	0.603822	FALSE	Layer_2-5_ExN	0.310404	0.332173	Cortex
0.00493139	0.0213554	0.218	0.187	1	DS_vs_WT	Pex1	0.0079331	FALSE	Layer_2-5_ExN	0.418632	0.439787	Cortex
0.00191754	0.0205003	0.062	0.042	0.960688	DS_vs_WT	Casp4	0.00352542	FALSE	Layer_2-5_ExN	0.090608	0.106216	Cortex
2.33792e-05	0.0192852	0.157	0.117	0.011713	DS_vs_WT	Pdgfra	5.58083e-05	FALSE	Layer_2-5_ExN	0.298074	0.315543	Cortex
0.000283455	0.0186083	0.054	0.036	0.142011	DS_vs_WT	Gadd45a	0.000582657	FALSE	Layer_2-5_ExN	0.0730222	0.086952	Cortex
0.000161765	0.015272	0.08	0.057	0.0810441	DS_vs_WT	Notch3	0.000349764	FALSE	Layer_2-5_ExN	0.115716	0.12759	Cortex
0.00674764	0.0140615	0.112	0.092	1	DS_vs_WT	Aldh4a1	0.0103487	FALSE	Layer_2-5_ExN	0.180118	0.191676	Cortex
0.107313	0.0139713	0.098	0.083	1	DS_vs_WT	Il5ra	0.129125	FALSE	Layer_2-5_ExN	0.161583	0.172886	Cortex
0.300868	0.0139146	0.05	0.041	1	DS_vs_WT	C4b	0.324776	FALSE	Layer_2-5_ExN	0.0775235	0.0879663	Cortex
8.09463e-05	0.0137036	0.293	0.251	0.0405541	DS_vs_WT	Glb1	0.000181516	FALSE	Layer_2-5_ExN	0.578534	0.593599	Cortex
0.00206037	0.00982024	0.078	0.059	1	DS_vs_WT	Cxcl11	0.00363017	FALSE	Layer_2-5_ExN	0.110424	0.118009	Cortex
0.0834984	0.00967277	0.09	0.077	1	DS_vs_WT	Bcan	0.103923	FALSE	Layer_2-5_ExN	0.145563	0.153269	Cortex
6.49148e-06	0.00912784	0.318	0.271	0.00325223	DS_vs_WT	Smpd1	1.67085e-05	FALSE	Layer_2-5_ExN	0.62998	0.640325	Cortex
0.106791	0.00855108	0.402	0.378	1	DS_vs_WT	Psme1	0.12902	FALSE	Layer_2-5_ExN	0.927421	0.938879	Cortex
0.801253	0.00677095	0.06	0.06	1	DS_vs_WT	Atr	0.810969	FALSE	Layer_2-5_ExN	0.105423	0.110623	Cortex
0.00314859	0.00672934	0.297	0.264	1	DS_vs_WT	Clu	0.00535622	FALSE	Layer_2-5_ExN	0.637167	0.644822	Cortex
0.00598734	0.00650738	0.166	0.144	1	DS_vs_WT	Aars2	0.00927881	FALSE	Layer_2-5_ExN	0.293688	0.299536	Cortex
0.00716798	0.00640778	0.068	0.053	1	DS_vs_WT	Ascl1	0.0108806	FALSE	Layer_2-5_ExN	0.111462	0.11641	Cortex
0.00459222	0.00622371	0.141	0.12	1	DS_vs_WT	Cdkn1a	0.00755164	FALSE	Layer_2-5_ExN	0.239791	0.245151	Cortex
0.0539629	0.00509905	0.075	0.063	1	DS_vs_WT	Il1a	0.0697512	FALSE	Layer_2-5_ExN	0.120854	0.124823	Cortex
0.000530618	0.00372409	0.18	0.151	0.26584	DS_vs_WT	Mri1	0.00104015	FALSE	Layer_2-5_ExN	0.335481	0.338932	Cortex
0.0550938	0.00294694	0.07	0.059	1	DS_vs_WT	Gpx7	0.0709033	FALSE	Layer_2-5_ExN	0.113514	0.115791	Cortex
0.0179181	0.00056617	0.196	0.177	1	DS_vs_WT	Aldh2	0.0254988	FALSE	Layer_2-5_ExN	0.371316	0.371854	Cortex
1	0	1	1	1	DS_vs_WT	Unnamed: 0	1	FALSE	Layer_2-5_ExN	1.356e-177	1.01201e-178	Cortex
0.195855	-0.00287809	0.321	0.305	1	DS_vs_WT	Tbk1	0.219595	FALSE	Layer_2-5_ExN	0.720885	0.717455	Cortex
0.922483	-0.0034003	0.081	0.08	1	DS_vs_WT	Tap1	0.92561	FALSE	Layer_2-5_ExN	0.148043	0.14534	Cortex
0.151121	-0.0048878	0.114	0.105	1	DS_vs_WT	Rfx5	0.174734	FALSE	Layer_2-5_ExN	0.218288	0.214167	Cortex
0.0954702	-0.00505008	0.061	0.052	1	DS_vs_WT	Fbln2	0.116773	FALSE	Layer_2-5_ExN	0.118249	0.114342	Cortex
0.385023	-0.00576552	0.057	0.054	1	DS_vs_WT	Gstm1	0.409953	FALSE	Layer_2-5_ExN	0.0972974	0.092921	Cortex
0.0439645	-0.00616021	0.081	0.072	1	DS_vs_WT	Tspo	0.0588846	FALSE	Layer_2-5_ExN	0.139215	0.134361	Cortex
0.0511684	-0.00746278	0.053	0.047	1	DS_vs_WT	Slc7a2	0.0667219	FALSE	Layer_2-5_ExN	0.0981214	0.0924557	Cortex
0.182895	-0.0078479	0.085	0.08	1	DS_vs_WT	Ccl25	0.207421	FALSE	Layer_2-5_ExN	0.15102	0.144776	Cortex
0.597659	-0.00806106	0.131	0.124	1	DS_vs_WT	Tnc	0.620726	FALSE	Layer_2-5_ExN	0.302159	0.294904	Cortex
0.0116177	-0.00820039	0.083	0.073	1	DS_vs_WT	Tfam	0.0171086	FALSE	Layer_2-5_ExN	0.148241	0.141732	Cortex
0.664737	-0.00906222	0.41	0.423	1	DS_vs_WT	Otx1	0.683202	FALSE	Layer_2-5_ExN	1.67857	1.66179	Cortex
0.80275	-0.00994952	0.248	0.246	1	DS_vs_WT	Axin2	0.810969	FALSE	Layer_2-5_ExN	0.555241	0.544552	Cortex
0.642277	-0.0109493	0.198	0.195	1	DS_vs_WT	Axin1	0.662418	FALSE	Layer_2-5_ExN	0.399556	0.388974	Cortex
0.000677536	-0.0120956	0.376	0.341	0.339445	DS_vs_WT	Atrip	0.00131079	FALSE	Layer_2-5_ExN	0.856531	0.841031	Cortex
0.0153837	-0.0133705	0.379	0.354	1	DS_vs_WT	Sp1	0.0221047	FALSE	Layer_2-5_ExN	0.895544	0.878058	Cortex
0.175653	-0.0148912	0.054	0.054	1	DS_vs_WT	Acot2	0.200746	FALSE	Layer_2-5_ExN	0.0930643	0.0818399	Cortex
0.194611	-0.0154103	0.058	0.056	1	DS_vs_WT	Opn3	0.21903	FALSE	Layer_2-5_ExN	0.109905	0.0981129	Cortex
0.301735	-0.0157852	0.099	0.097	1	DS_vs_WT	Nox1	0.324776	FALSE	Layer_2-5_ExN	0.186958	0.174041	Cortex
0.243226	-0.0177704	0.081	0.079	1	DS_vs_WT	Gusb	0.268637	FALSE	Layer_2-5_ExN	0.162022	0.147796	Cortex
0.000300579	-0.0179918	0.71	0.658	0.15059	DS_vs_WT	Gria1	0.000613596	FALSE	Layer_2-5_ExN	3.80843	3.74883	Cortex
0.732441	-0.0180497	0.083	0.088	1	DS_vs_WT	Npc2	0.747595	FALSE	Layer_2-5_ExN	0.159777	0.145357	Cortex
0.532331	-0.0182665	0.066	0.066	1	DS_vs_WT	Il4	0.556784	FALSE	Layer_2-5_ExN	0.13025	0.11603	Cortex
0.750838	-0.019813	0.12	0.124	1	DS_vs_WT	Mif	0.763739	FALSE	Layer_2-5_ExN	0.254205	0.237098	Cortex
0.00164722	-0.0200145	0.827	0.792	0.825257	DS_vs_WT	Txnrd1	0.00306652	FALSE	Layer_2-5_ExN	4.22292	4.15096	Cortex
1.91345e-08	-0.0209717	0.927	0.874	9.58639e-06	DS_vs_WT	Dtx4	7.3556e-08	FALSE	Layer_2-5_ExN	7.49602	7.37341	Cortex
3.90362e-05	-0.0215944	0.58	0.535	0.0195571	DS_vs_WT	Psen1	9.02712e-05	FALSE	Layer_2-5_ExN	1.76589	1.7248	Cortex
0.863085	-0.0225048	0.438	0.441	1	DS_vs_WT	Sox5	0.868957	FALSE	Layer_2-5_ExN	1.45145	1.41351	Cortex
0.240669	-0.0233752	0.04	0.052	1	DS_vs_WT	Cycs	0.26681	FALSE	Layer_2-5_ExN	0.0907285	0.0731984	Cortex
0.683034	-0.023617	0.066	0.072	1	DS_vs_WT	Psmb1	0.699579	FALSE	Layer_2-5_ExN	0.1515	0.132803	Cortex
0.00201159	-0.0249091	0.078	0.07	1	DS_vs_WT	Sall1	0.00360867	FALSE	Layer_2-5_ExN	0.156712	0.136912	Cortex
0.00589503	-0.0253927	0.094	0.081	1	DS_vs_WT	Cxcl5	0.00923243	FALSE	Layer_2-5_ExN	0.181976	0.161355	Cortex
0.479516	-0.0261859	0.067	0.071	1	DS_vs_WT	Il18	0.505112	FALSE	Layer_2-5_ExN	0.136795	0.116348	Cortex
0.37258	-0.0276188	0.055	0.062	1	DS_vs_WT	Prlr	0.399579	FALSE	Layer_2-5_ExN	0.118124	0.0969224	Cortex
0.62314	-0.0288832	0.127	0.132	1	DS_vs_WT	Arx	0.644928	FALSE	Layer_2-5_ExN	0.296965	0.271258	Cortex
0.0553743	-0.0310237	0.129	0.124	1	DS_vs_WT	Pecam1	0.0709558	FALSE	Layer_2-5_ExN	0.261136	0.234306	Cortex
0.402684	-0.0312922	0.09	0.096	1	DS_vs_WT	Lamp5	0.42722	FALSE	Layer_2-5_ExN	0.195255	0.169609	Cortex
0.500431	-0.0315023	0.072	0.081	1	DS_vs_WT	Slc17a6	0.525276	FALSE	Layer_2-5_ExN	0.17038	0.145101	Cortex
0.254409	-0.034057	0.112	0.117	1	DS_vs_WT	Lhx2	0.278228	FALSE	Layer_2-5_ExN	0.241412	0.212449	Cortex
0.245129	-0.0340584	0.054	0.062	1	DS_vs_WT	Cflar	0.269733	FALSE	Layer_2-5_ExN	0.119292	0.0931776	Cortex
0.0898881	-0.0379204	0.079	0.085	1	DS_vs_WT	Eef1aknmt	0.110862	FALSE	Layer_2-5_ExN	0.163941	0.133746	Cortex
0.140215	-0.0379577	0.088	0.093	1	DS_vs_WT	Gad2	0.164046	FALSE	Layer_2-5_ExN	0.190387	0.159476	Cortex
0.165289	-0.0401086	0.09	0.096	1	DS_vs_WT	Foxj1	0.189633	FALSE	Layer_2-5_ExN	0.199265	0.166383	Cortex
0.0908226	-0.0414368	0.064	0.07	1	DS_vs_WT	Cd8a	0.11155	FALSE	Layer_2-5_ExN	0.143767	0.111383	Cortex
0.219349	-0.0415309	0.07	0.084	1	DS_vs_WT	Plin2	0.244088	FALSE	Layer_2-5_ExN	0.158247	0.12538	Cortex
0.280116	-0.0418818	0.079	0.094	1	DS_vs_WT	Fgfr2	0.303716	FALSE	Layer_2-5_ExN	0.187561	0.153582	Cortex
0.0875469	-0.0422538	0.07	0.08	1	DS_vs_WT	Fzd4	0.108426	FALSE	Layer_2-5_ExN	0.147204	0.114092	Cortex
0.0717529	-0.0424216	0.044	0.058	1	DS_vs_WT	Atm	0.0903781	FALSE	Layer_2-5_ExN	0.105597	0.0735606	Cortex
0.0833123	-0.0437283	0.101	0.107	1	DS_vs_WT	Myd88	0.103923	FALSE	Layer_2-5_ExN	0.215444	0.179157	Cortex
0.177262	-0.043995	0.067	0.083	1	DS_vs_WT	Galc	0.201806	FALSE	Layer_2-5_ExN	0.160974	0.126105	Cortex
0.164644	-0.0441523	0.045	0.058	1	DS_vs_WT	Gstk1	0.189629	FALSE	Layer_2-5_ExN	0.120656	0.0868793	Cortex
0.133654	-0.0450176	0.189	0.191	1	DS_vs_WT	Dgat1	0.15699	FALSE	Layer_2-5_ExN	0.427375	0.383523	Cortex
0.00203099	-0.0452604	0.364	0.346	1	DS_vs_WT	Ythdf1	0.00362153	FALSE	Layer_2-5_ExN	0.882889	0.824736	Cortex
0.00491988	-0.0454143	0.529	0.505	1	DS_vs_WT	Plk3	0.0079331	FALSE	Layer_2-5_ExN	1.54907	1.47008	Cortex
0.116855	-0.0461452	0.062	0.077	1	DS_vs_WT	Plaur	0.138912	FALSE	Layer_2-5_ExN	0.140746	0.104836	Cortex
0.0535678	-0.0468627	0.053	0.065	1	DS_vs_WT	C1qa	0.0695441	FALSE	Layer_2-5_ExN	0.119512	0.0837316	Cortex
0.378482	-0.0469613	0.192	0.206	1	DS_vs_WT	Traf6	0.404443	FALSE	Layer_2-5_ExN	0.441601	0.395431	Cortex
0.0457397	-0.0477236	0.266	0.257	1	DS_vs_WT	Lhx6	0.0607128	FALSE	Layer_2-5_ExN	0.681522	0.626808	Cortex
0.0134518	-0.0486218	0.059	0.065	1	DS_vs_WT	Ccna2	0.0195183	FALSE	Layer_2-5_ExN	0.135992	0.0983451	Cortex
0.0835596	-0.0494649	0.046	0.051	1	DS_vs_WT	Thbs1	0.103923	FALSE	Layer_2-5_ExN	0.123096	0.0852415	Cortex
0.0105693	-0.0497437	0.053	0.064	1	DS_vs_WT	Mki67	0.0157212	FALSE	Layer_2-5_ExN	0.119615	0.0816693	Cortex
0.11326	-0.050853	0.251	0.257	1	DS_vs_WT	Atf6	0.135728	FALSE	Layer_2-5_ExN	0.569423	0.515066	Cortex
0.0691533	-0.0511159	0.068	0.077	1	DS_vs_WT	Nbn	0.087476	FALSE	Layer_2-5_ExN	0.161695	0.121256	Cortex
0.0195569	-0.0515334	0.049	0.072	1	DS_vs_WT	Cnp	0.0274353	FALSE	Layer_2-5_ExN	0.127831	0.0882557	Cortex
7.06984e-05	-0.051625	0.822	0.788	0.0354199	DS_vs_WT	Aars	0.000159746	FALSE	Layer_2-5_ExN	3.90479	3.73238	Cortex
0.101219	-0.0529923	0.06	0.071	1	DS_vs_WT	Ifit2	0.122791	FALSE	Layer_2-5_ExN	0.147006	0.105639	Cortex
0.0368319	-0.0560398	0.057	0.073	1	DS_vs_WT	C4a	0.050083	FALSE	Layer_2-5_ExN	0.140718	0.0972579	Cortex
0.260461	-0.0565483	0.281	0.295	1	DS_vs_WT	Sirt5	0.283443	FALSE	Layer_2-5_ExN	0.660772	0.596935	Cortex
0.0140862	-0.056931	0.044	0.065	1	DS_vs_WT	Xbp1	0.020339	FALSE	Layer_2-5_ExN	0.118038	0.0747772	Cortex
0.000106884	-0.0592285	0.514	0.465	0.0535488	DS_vs_WT	Npy	0.000237877	FALSE	Layer_2-5_ExN	2.69594	2.54728	Cortex
0.14929	-0.0592796	0.122	0.142	1	DS_vs_WT	Syt9	0.173294	FALSE	Layer_2-5_ExN	0.297855	0.245607	Cortex
0.133457	-0.0594358	0.343	0.349	1	DS_vs_WT	Crebbp	0.15699	FALSE	Layer_2-5_ExN	0.873943	0.798309	Cortex
0.000178481	-0.0596464	0.441	0.419	0.0894188	DS_vs_WT	Hif1a	0.000377666	FALSE	Layer_2-5_ExN	1.157	1.06964	Cortex
7.23914e-10	-0.059732	0.518	0.465	3.62681e-07	DS_vs_WT	Lrp6	3.10549e-09	FALSE	Layer_2-5_ExN	1.38799	1.29114	Cortex
2.18119e-05	-0.0601183	0.299	0.279	0.0109277	DS_vs_WT	Mx1	5.29206e-05	FALSE	Layer_2-5_ExN	0.691572	0.622532	Cortex
0.004118	-0.0607501	0.13	0.128	1	DS_vs_WT	Rgs8	0.00688661	FALSE	Layer_2-5_ExN	0.315006	0.260782	Cortex
0.0368854	-0.060911	0.451	0.431	1	DS_vs_WT	Tle4	0.050083	FALSE	Layer_2-5_ExN	1.85783	1.73969	Cortex
0.254729	-0.0631387	0.064	0.075	1	DS_vs_WT	Reln	0.278228	FALSE	Layer_2-5_ExN	0.188685	0.137785	Cortex
0.100733	-0.0636098	0.099	0.116	1	DS_vs_WT	Lifr	0.122704	FALSE	Layer_2-5_ExN	0.23559	0.182295	Cortex
0.0006854	-0.0639242	0.165	0.171	0.343385	DS_vs_WT	Smurf2	0.00131739	FALSE	Layer_2-5_ExN	0.353545	0.294881	Cortex
0.000954587	-0.0648784	0.029	0.054	0.478248	DS_vs_WT	Lum	0.00179973	FALSE	Layer_2-5_ExN	0.0988367	0.0505164	Cortex
8.61723e-06	-0.0652958	0.425	0.392	0.00431723	DS_vs_WT	Cx3cl1	2.18008e-05	FALSE	Layer_2-5_ExN	1.12065	1.02681	Cortex
0.0661823	-0.0669134	0.124	0.135	1	DS_vs_WT	Wnt7a	0.0840771	FALSE	Layer_2-5_ExN	0.300163	0.241238	Cortex
0.0482047	-0.069112	0.116	0.137	1	DS_vs_WT	Lix1	0.0635156	FALSE	Layer_2-5_ExN	0.27202	0.212521	Cortex
0.198322	-0.0712299	0.601	0.609	1	DS_vs_WT	Nlgn1	0.221522	FALSE	Layer_2-5_ExN	2.67791	2.50073	Cortex
0.121119	-0.0720601	0.312	0.327	1	DS_vs_WT	Mettl3	0.143405	FALSE	Layer_2-5_ExN	0.786326	0.699294	Cortex
0.00259345	-0.072427	0.115	0.118	1	DS_vs_WT	Neurod1	0.00448924	FALSE	Layer_2-5_ExN	0.287659	0.224611	Cortex
0.0031695	-0.0748325	0.029	0.05	1	DS_vs_WT	Cartpt	0.00536097	FALSE	Layer_2-5_ExN	0.112536	0.0563001	Cortex
4.03481e-13	-0.075285	0.717	0.65	2.02144e-10	DS_vs_WT	Ctnnb1	2.65401e-12	FALSE	Layer_2-5_ExN	3.05671	2.85045	Cortex
0.0025927	-0.0757301	0.04	0.065	1	DS_vs_WT	Slc1a3	0.00448924	FALSE	Layer_2-5_ExN	0.134031	0.0760386	Cortex
0.00708668	-0.0772445	0.066	0.091	1	DS_vs_WT	Irf2	0.0108127	FALSE	Layer_2-5_ExN	0.174977	0.113721	Cortex
0.0593985	-0.0772553	0.797	0.8	1	DS_vs_WT	Grin2b	0.0757843	FALSE	Layer_2-5_ExN	4.93079	4.62156	Cortex
0.00454965	-0.0773428	0.32	0.319	1	DS_vs_WT	Cpt1c	0.00752344	FALSE	Layer_2-5_ExN	0.779616	0.686723	Cortex
0.0255882	-0.0792132	0.447	0.452	1	DS_vs_WT	Otud4	0.035393	FALSE	Layer_2-5_ExN	1.24403	1.12414	Cortex
0.00750415	-0.0808517	0.244	0.252	1	DS_vs_WT	Aldh9a1	0.0113328	FALSE	Layer_2-5_ExN	0.5906	0.503911	Cortex
0.0448935	-0.0815268	0.127	0.147	1	DS_vs_WT	Aldh1l1	0.0598579	FALSE	Layer_2-5_ExN	0.327614	0.254671	Cortex
0.000165044	-0.0848818	0.064	0.102	0.0826871	DS_vs_WT	Pdk3	0.000354008	FALSE	Layer_2-5_ExN	0.193184	0.125008	Cortex
0.00187453	-0.088314	0.083	0.109	0.939141	DS_vs_WT	Dynll1	0.00346788	FALSE	Layer_2-5_ExN	0.210794	0.138898	Cortex
2.49368e-07	-0.0912218	0.019	0.05	0.000124933	DS_vs_WT	Gabrg2	7.91799e-07	FALSE	Layer_2-5_ExN	0.093586	0.0265792	Cortex
0.0201877	-0.0942524	0.166	0.193	1	DS_vs_WT	Sirt1	0.0281866	FALSE	Layer_2-5_ExN	0.423538	0.33351	Cortex
0.00529993	-0.0945576	0.092	0.118	1	DS_vs_WT	Casp7	0.00847988	FALSE	Layer_2-5_ExN	0.247117	0.167999	Cortex
0.0175279	-0.0957337	0.175	0.209	1	DS_vs_WT	Prkaa1	0.0250641	FALSE	Layer_2-5_ExN	0.45484	0.361434	Cortex
0.0133884	-0.0964346	0.127	0.157	1	DS_vs_WT	Cck	0.0195183	FALSE	Layer_2-5_ExN	0.341639	0.254891	Cortex
0.00198556	-0.0968331	0.098	0.127	0.994765	DS_vs_WT	Ythdc2	0.00358369	FALSE	Layer_2-5_ExN	0.2585	0.176803	Cortex
0.00577907	-0.0974346	0.57	0.575	1	DS_vs_WT	Sars	0.00914762	FALSE	Layer_2-5_ExN	1.95218	1.75938	Cortex
0.00336125	-0.0974949	0.131	0.151	1	DS_vs_WT	Gsr	0.00565302	FALSE	Layer_2-5_ExN	0.325627	0.239003	Cortex
0.0417897	-0.102492	0.149	0.154	1	DS_vs_WT	Sst	0.0564829	FALSE	Layer_2-5_ExN	0.482514	0.380847	Cortex
0.0191243	-0.103986	0.503	0.545	1	DS_vs_WT	Ythdc1	0.0269562	TRUE	Layer_2-5_ExN	1.67462	1.48862	Cortex
2.64456e-05	-0.104396	0.04	0.07	0.0132492	DS_vs_WT	Zhx2	6.21261e-05	TRUE	Layer_2-5_ExN	0.146488	0.0664571	Cortex
2.2942e-05	-0.109816	0.049	0.079	0.0114939	DS_vs_WT	Ifitm1	5.52099e-05	TRUE	Layer_2-5_ExN	0.165726	0.0802854	Cortex
0.0113063	-0.111014	0.725	0.761	1	DS_vs_WT	Anxa6	0.0167333	TRUE	Layer_2-5_ExN	3.70757	3.35892	Cortex
0.0190861	-0.111095	0.137	0.164	1	DS_vs_WT	Foxo1	0.0269562	TRUE	Layer_2-5_ExN	0.414849	0.309988	Cortex
0.00587854	-0.111215	0.248	0.275	1	DS_vs_WT	Rad50	0.00923243	TRUE	Layer_2-5_ExN	0.627413	0.506672	Cortex
6.06897e-06	-0.11164	0.074	0.123	0.00304056	DS_vs_WT	Relb	1.5758e-05	TRUE	Layer_2-5_ExN	0.24497	0.152264	Cortex
1.08011e-07	-0.112047	0.898	0.872	5.41133e-05	DS_vs_WT	Eif4g1	3.71757e-07	TRUE	Layer_2-5_ExN	6.03478	5.5091	Cortex
0.00258413	-0.113559	0.325	0.345	1	DS_vs_WT	Casp3	0.00448924	TRUE	Layer_2-5_ExN	0.877924	0.735774	Cortex
7.13351e-06	-0.113664	0.37	0.367	0.00357389	DS_vs_WT	Psmb2	1.82028e-05	TRUE	Layer_2-5_ExN	0.984329	0.833993	Cortex
9.95015e-07	-0.119059	0.047	0.091	0.000498502	DS_vs_WT	Mettl4	2.85946e-06	TRUE	Layer_2-5_ExN	0.189232	0.0950306	Cortex
0.000523739	-0.120359	0.091	0.122	0.262393	DS_vs_WT	Mag	0.00103351	TRUE	Layer_2-5_ExN	0.273572	0.171634	Cortex
0.000178626	-0.121868	0.243	0.264	0.0894916	DS_vs_WT	Rars	0.000377666	TRUE	Layer_2-5_ExN	0.63164	0.499472	Cortex
0.115473	-0.122452	0.222	0.247	1	DS_vs_WT	Cux2	0.137822	FALSE	Layer_2-5_ExN	0.872362	0.719999	Cortex
0.00449263	-0.127104	0.165	0.183	1	DS_vs_WT	Gad1	0.00747088	TRUE	Layer_2-5_ExN	0.485235	0.359981	Cortex
2.33756e-06	-0.128888	0.056	0.098	0.00117112	DS_vs_WT	Unc5d	6.40664e-06	TRUE	Layer_2-5_ExN	0.204119	0.10121	Cortex
8.67535e-09	-0.133371	0.029	0.072	4.34635e-06	DS_vs_WT	Homer1	3.37882e-08	TRUE	Layer_2-5_ExN	0.152042	0.0503147	Cortex
2.76371e-08	-0.134108	0.065	0.122	1.38462e-05	DS_vs_WT	Lamp2	1.02257e-07	TRUE	Layer_2-5_ExN	0.24347	0.133091	Cortex
1.59766e-06	-0.134385	0.061	0.108	0.000800428	DS_vs_WT	Ythdf2	4.46139e-06	TRUE	Layer_2-5_ExN	0.223993	0.115129	Cortex
4.80457e-05	-0.140779	0.13	0.18	0.0240709	DS_vs_WT	Topbp1	0.000110244	TRUE	Layer_2-5_ExN	0.377288	0.24924	Cortex
1.89748e-11	-0.1455	0.036	0.092	9.50637e-09	DS_vs_WT	Prdx2	1.00295e-10	TRUE	Layer_2-5_ExN	0.175177	0.0624379	Cortex
9.51892e-11	-0.147441	0.683	0.659	4.76898e-08	DS_vs_WT	Gsk3b	4.47238e-10	TRUE	Layer_2-5_ExN	2.63989	2.28628	Cortex
3.02816e-10	-0.15054	0.441	0.424	1.51711e-07	DS_vs_WT	S100a10	1.31814e-09	TRUE	Layer_2-5_ExN	1.31211	1.08301	Cortex
0.000108662	-0.155797	0.607	0.647	0.0544398	DS_vs_WT	Mapk14	0.00024003	TRUE	Layer_2-5_ExN	2.24557	1.91334	Cortex
9.08484e-07	-0.159696	0.124	0.167	0.00045515	DS_vs_WT	Stat2	2.63638e-06	TRUE	Layer_2-5_ExN	0.365985	0.222848	Cortex
1.48315e-05	-0.164439	0.455	0.481	0.00743061	DS_vs_WT	Arf1	3.65845e-05	TRUE	Layer_2-5_ExN	1.5034	1.23372	Cortex
4.25474e-06	-0.169439	0.202	0.245	0.00213163	DS_vs_WT	Sod2	1.12447e-05	TRUE	Layer_2-5_ExN	0.563977	0.390671	Cortex
2.72337e-10	-0.176184	0.055	0.116	1.36441e-07	DS_vs_WT	Cxcl12	1.22139e-09	TRUE	Layer_2-5_ExN	0.251686	0.107793	Cortex
1.66994e-07	-0.181638	0.495	0.516	8.36639e-05	DS_vs_WT	Mecp2	5.49224e-07	TRUE	Layer_2-5_ExN	1.61335	1.3042	Cortex
0.000363204	-0.182331	0.27	0.294	0.181965	DS_vs_WT	Sorl1	0.000731349	TRUE	Layer_2-5_ExN	0.931338	0.702045	Cortex
3.69593e-06	-0.182734	0.618	0.642	0.00185166	DS_vs_WT	Dlg4	9.85582e-06	TRUE	Layer_2-5_ExN	2.41096	2.00517	Cortex
1.42217e-05	-0.184628	0.33	0.395	0.00712505	DS_vs_WT	Wars	3.53749e-05	TRUE	Layer_2-5_ExN	1.02948	0.785693	Cortex
2.47404e-06	-0.191192	0.322	0.378	0.00123949	DS_vs_WT	Gba	6.71849e-06	TRUE	Layer_2-5_ExN	0.951832	0.709574	Cortex
3.36256e-09	-0.191784	0.213	0.24	1.68464e-06	DS_vs_WT	Cxcl13	1.34502e-08	TRUE	Layer_2-5_ExN	0.605261	0.405442	Cortex
2.72173e-07	-0.195969	0.592	0.606	0.000136359	DS_vs_WT	Slc17a7	8.48034e-07	TRUE	Layer_2-5_ExN	2.29305	1.87479	Cortex
1.55334e-12	-0.203891	0.077	0.149	7.78223e-10	DS_vs_WT	Kras	9.19577e-12	TRUE	Layer_2-5_ExN	0.299299	0.128059	Cortex
3.1508e-07	-0.213659	0.34	0.408	0.000157855	DS_vs_WT	Itch	9.71497e-07	TRUE	Layer_2-5_ExN	1.06623	0.781806	Cortex
6.95206e-11	-0.21972	0.1	0.176	3.48298e-08	DS_vs_WT	Creb1	3.37346e-10	TRUE	Layer_2-5_ExN	0.401008	0.203091	Cortex
2.748e-09	-0.21983	0.156	0.221	1.37675e-06	DS_vs_WT	Trp53bp1	1.11426e-08	TRUE	Layer_2-5_ExN	0.509473	0.296134	Cortex
3.01074e-08	-0.222148	0.726	0.771	1.50838e-05	DS_vs_WT	Syn1	1.10022e-07	TRUE	Layer_2-5_ExN	3.98015	3.26942	Cortex
3.6116e-11	-0.227129	0.174	0.269	1.80941e-08	DS_vs_WT	Braf	1.8755e-10	TRUE	Layer_2-5_ExN	0.617724	0.382075	Cortex
1.73515e-12	-0.238904	0.118	0.191	8.6931e-10	DS_vs_WT	Wtap	1.00707e-11	TRUE	Layer_2-5_ExN	0.426833	0.209082	Cortex
1.55064e-09	-0.251608	0.407	0.502	7.76868e-07	DS_vs_WT	Jak2	6.37483e-09	TRUE	Layer_2-5_ExN	1.55176	1.14337	Cortex
2.1306e-07	-0.274319	0.207	0.282	0.000106743	DS_vs_WT	Cntn6	6.93029e-07	TRUE	Layer_2-5_ExN	0.9486	0.611181	Cortex
1.22162e-12	-0.280638	0.232	0.321	6.12032e-10	DS_vs_WT	Cr1l	7.37958e-12	TRUE	Layer_2-5_ExN	0.796944	0.479293	Cortex
5.24907e-13	-0.280933	0.553	0.596	2.62978e-10	DS_vs_WT	Jak1	3.3058e-12	TRUE	Layer_2-5_ExN	2.36465	1.76931	Cortex
2.95571e-14	-0.315203	0.409	0.476	1.48081e-11	DS_vs_WT	Fto	2.08307e-13	TRUE	Layer_2-5_ExN	1.51257	1.01945	Cortex
1.35192e-14	-0.335509	0.633	0.7	6.77309e-12	DS_vs_WT	Lamp1	1.02607e-13	TRUE	Layer_2-5_ExN	3.46584	2.53919	Cortex
6.67401e-23	-0.343098	0.095	0.209	3.34368e-20	DS_vs_WT	Ogt	8.23128e-22	TRUE	Layer_2-5_ExN	0.499755	0.182327	Cortex
1.3083e-14	-0.34934	0.268	0.351	6.55456e-12	DS_vs_WT	Ptprd	1.01909e-13	TRUE	Layer_2-5_ExN	1.03677	0.598746	Cortex
2.7338e-17	-0.356311	0.33	0.446	1.36963e-14	DS_vs_WT	Pdia3	2.38001e-16	TRUE	Layer_2-5_ExN	1.31241	0.806358	Cortex
2.11375e-22	-0.368787	0.146	0.267	1.05899e-19	DS_vs_WT	Csnk1a1	2.40643e-21	TRUE	Layer_2-5_ExN	0.655447	0.282033	Cortex
8.55595e-14	-0.370994	0.267	0.366	4.28653e-11	DS_vs_WT	Vcan	5.88968e-13	TRUE	Layer_2-5_ExN	1.19299	0.695726	Cortex
2.7928e-20	-0.390423	0.298	0.417	1.39919e-17	DS_vs_WT	Mapk1	2.75556e-19	TRUE	Layer_2-5_ExN	1.19747	0.676466	Cortex
7.98593e-23	-0.416748	0.388	0.491	4.00095e-20	DS_vs_WT	Rac1	9.45534e-22	TRUE	Layer_2-5_ExN	1.67033	1.00038	Cortex
3.22485e-39	-0.433482	0.893	0.917	1.61565e-36	DS_vs_WT	Apc	7.95463e-38	TRUE	Layer_2-5_ExN	7.84009	5.54584	Cortex
1.88738e-21	-0.436863	0.381	0.516	9.45577e-19	DS_vs_WT	Cd47	2.06913e-20	TRUE	Layer_2-5_ExN	1.79841	1.06729	Cortex
1.73629e-26	-0.441269	0.369	0.544	8.69882e-24	DS_vs_WT	Fabp7	2.56971e-25	TRUE	Layer_2-5_ExN	2.00094	1.21015	Cortex
2.14412e-29	-0.452205	0.176	0.324	1.0742e-26	DS_vs_WT	Gabra1	3.73329e-28	TRUE	Layer_2-5_ExN	0.872206	0.368442	Cortex
3.58372e-26	-0.496322	0.44	0.564	1.79545e-23	DS_vs_WT	Mef2c	5.05134e-25	TRUE	Layer_2-5_ExN	2.33684	1.36552	Cortex
3.78858e-31	-0.4987	0.323	0.484	1.89808e-28	DS_vs_WT	Nras	7.00888e-30	TRUE	Layer_2-5_ExN	1.56244	0.813556	Cortex
5.45043e-35	-0.564508	0.49	0.598	2.73066e-32	DS_vs_WT	Dcx	1.15238e-33	TRUE	Layer_2-5_ExN	2.91271	1.64572	Cortex
4.27767e-57	-0.68095	0.518	0.715	2.14311e-54	DS_vs_WT	Hsp90b1	3.16548e-55	TRUE	Layer_2-5_ExN	3.43186	1.76439	Cortex
2.68751e-52	-0.708954	0.51	0.658	1.34644e-49	DS_vs_WT	Tnr	1.31426e-50	TRUE	Layer_2-5_ExN	3.18578	1.56071	Cortex
3.86502e-67	-0.850455	0.285	0.507	1.93638e-64	DS_vs_WT	Map2	3.81349e-65	TRUE	Layer_2-5_ExN	2.02315	0.676671	Cortex
p_val	avg_log2FC	pct.1	pct.2	p_val_adj	comparison	gene	FDR	sig	celltype	exp.1	exp.2	Cortex
5.03013e-245	0.743283	0.347	0.114	2.5201e-242	DS_vs_WT	Col1a1	1.22232e-242	TRUE	Layer_5-6a_ExN	0.353319	1.26543	Cortex
1.97105e-132	0.634546	0.654	0.484	9.87497e-130	DS_vs_WT	Pou3f3	9.57931e-131	TRUE	Layer_5-6a_ExN	2.54696	4.50648	Cortex
3.22796e-154	0.561471	0.734	0.549	1.61721e-151	DS_vs_WT	Dvl1	2.61465e-152	TRUE	Layer_5-6a_ExN	2.69334	4.45053	Cortex
9.46414e-152	0.559406	0.48	0.265	4.74154e-149	DS_vs_WT	Igfbp2	5.74947e-150	TRUE	Layer_5-6a_ExN	1.01241	1.96562	Cortex
8.51048e-128	0.407771	0.952	0.89	4.26375e-125	DS_vs_WT	Ncan	3.44674e-126	TRUE	Layer_5-6a_ExN	10.7692	14.6134	Cortex
4.18236e-127	0.39919	0.989	0.962	2.09536e-124	DS_vs_WT	App	1.45188e-125	TRUE	Layer_5-6a_ExN	20.2611	27.0384	Cortex
1.04341e-78	0.393963	0.455	0.299	5.22748e-76	DS_vs_WT	Cdkn1c	1.81106e-77	TRUE	Layer_5-6a_ExN	1.14491	1.81841	Cortex
2.41204e-55	0.363546	0.582	0.454	1.20843e-52	DS_vs_WT	Wnt7b	2.25433e-54	TRUE	Layer_5-6a_ExN	2.27756	3.21685	Cortex
7.75966e-83	0.363524	0.611	0.447	3.88759e-80	DS_vs_WT	Vars	1.57133e-81	TRUE	Layer_5-6a_ExN	1.9021	2.73374	Cortex
1.60927e-58	0.35185	0.656	0.524	8.06242e-56	DS_vs_WT	Dkk3	1.70022e-57	TRUE	Layer_5-6a_ExN	3.54335	4.79821	Cortex
7.41694e-89	0.315408	0.452	0.289	3.71589e-86	DS_vs_WT	Fbln1	1.63847e-87	TRUE	Layer_5-6a_ExN	1.27441	1.8302	Cortex
1.97515e-63	0.303513	0.88	0.807	9.8955e-61	DS_vs_WT	Nlgn2	2.66645e-62	TRUE	Layer_5-6a_ExN	6.27795	7.98206	Cortex
8.86162e-60	0.289528	0.907	0.844	4.43967e-57	DS_vs_WT	Lrp1	1.02542e-58	TRUE	Layer_5-6a_ExN	7.80558	9.76253	Cortex
2.27482e-59	0.27834	0.365	0.237	1.13969e-56	DS_vs_WT	Vars2	2.51265e-58	TRUE	Layer_5-6a_ExN	0.761183	1.13596	Cortex
4.85971e-54	0.267466	0.348	0.228	2.43472e-51	DS_vs_WT	Csf2ra	4.37374e-53	TRUE	Layer_5-6a_ExN	0.72469	1.076	Cortex
4.90035e-45	0.253512	0.459	0.339	2.45507e-42	DS_vs_WT	Dyrk1a	3.96928e-44	TRUE	Layer_5-6a_ExN	1.30853	1.75201	Cortex
1.49541e-60	0.246796	0.181	0.087	7.49199e-58	DS_vs_WT	Aif1	1.81692e-59	TRUE	Layer_5-6a_ExN	0.241793	0.473474	Cortex
1.65186e-29	0.23813	0.256	0.175	8.27584e-27	DS_vs_WT	Mdga1	7.29824e-29	TRUE	Layer_5-6a_ExN	0.635053	0.928485	Cortex
1.09992e-47	0.237954	0.284	0.179	5.51061e-45	DS_vs_WT	Ifnar1	9.21658e-47	TRUE	Layer_5-6a_ExN	0.563472	0.843833	Cortex
4.0321e-44	0.214337	0.435	0.32	2.02008e-41	DS_vs_WT	Grin1	3.06188e-43	TRUE	Layer_5-6a_ExN	1.20155	1.55418	Cortex
1.02747e-34	0.200518	0.234	0.151	5.14762e-32	DS_vs_WT	Ldlr	5.54833e-34	TRUE	Layer_5-6a_ExN	0.460437	0.678204	Cortex
1.17068e-42	0.19575	0.519	0.402	5.86509e-40	DS_vs_WT	Rcan1	8.12785e-42	TRUE	Layer_5-6a_ExN	1.69238	2.08363	Cortex
4.30065e-27	0.177937	0.176	0.11	2.15463e-24	DS_vs_WT	Tyk2	1.65882e-26	TRUE	Layer_5-6a_ExN	0.309056	0.480889	Cortex
7.00146e-38	0.177725	0.131	0.065	3.50773e-35	DS_vs_WT	Kif7	4.14965e-37	TRUE	Layer_5-6a_ExN	0.174431	0.328398	Cortex
3.9968e-63	0.168728	0.12	0.046	2.00239e-60	DS_vs_WT	Col1a2	5.11169e-62	TRUE	Layer_5-6a_ExN	0.141451	0.283067	Cortex
1.40375e-49	0.163092	0.128	0.057	7.03281e-47	DS_vs_WT	Ifnar2	1.21826e-48	TRUE	Layer_5-6a_ExN	0.163646	0.302917	Cortex
5.93062e-43	0.162715	0.923	0.849	2.97124e-40	DS_vs_WT	Satb2	4.23865e-42	TRUE	Layer_5-6a_ExN	12.8931	14.5519	Cortex
1.91519e-44	0.161955	0.586	0.469	9.59511e-42	DS_vs_WT	Pld3	1.50126e-43	TRUE	Layer_5-6a_ExN	2.16452	2.54047	Cortex
1.16751e-35	0.157815	0.498	0.393	5.8492e-33	DS_vs_WT	Nos1	6.59776e-35	TRUE	Layer_5-6a_ExN	1.75405	2.07241	Cortex
1.0357e-26	0.142663	0.144	0.086	5.18883e-24	DS_vs_WT	Tapbp	3.93241e-26	TRUE	Layer_5-6a_ExN	0.251322	0.381385	Cortex
1.68528e-31	0.139659	0.191	0.121	8.44327e-29	DS_vs_WT	Lrp5	8.35763e-31	TRUE	Layer_5-6a_ExN	0.358607	0.496703	Cortex
1.08285e-25	0.133711	0.197	0.132	5.42508e-23	DS_vs_WT	Ggt7	3.81351e-25	TRUE	Layer_5-6a_ExN	0.398406	0.534208	Cortex
8.47841e-26	0.132529	0.437	0.351	4.24768e-23	DS_vs_WT	Ikbkb	3.02978e-25	TRUE	Layer_5-6a_ExN	1.26558	1.48356	Cortex
1.59893e-13	0.122591	0.081	0.049	8.01066e-11	DS_vs_WT	Cldn5	3.40826e-13	TRUE	Layer_5-6a_ExN	0.141559	0.242802	Cortex
9.62063e-10	0.119675	0.608	0.554	4.81994e-07	DS_vs_WT	Gabbr1	1.71898e-09	TRUE	Layer_5-6a_ExN	2.85163	3.18476	Cortex
1.57635e-28	0.108213	0.243	0.172	7.89754e-26	DS_vs_WT	Qars	6.60438e-28	TRUE	Layer_5-6a_ExN	0.536414	0.656088	Cortex
1.74449e-23	0.107556	0.491	0.408	8.73987e-21	DS_vs_WT	Bcl2l2	5.43474e-23	TRUE	Layer_5-6a_ExN	1.6192	1.82193	Cortex
1.14919e-16	0.10751	0.163	0.115	5.75744e-14	DS_vs_WT	Sorl1	2.90889e-16	TRUE	Layer_5-6a_ExN	0.336701	0.440119	Cortex
8.34041e-20	0.102058	0.398	0.327	4.17855e-17	DS_vs_WT	Cx3cl1	2.30309e-19	TRUE	Layer_5-6a_ExN	1.31178	1.48124	Cortex
1.8193e-19	0.101587	0.325	0.258	9.11471e-17	DS_vs_WT	Hsf1	4.96731e-19	TRUE	Layer_5-6a_ExN	0.855193	0.990535	Cortex
1.73776e-25	0.101435	0.106	0.06	8.70617e-23	DS_vs_WT	Sod1	5.86493e-25	TRUE	Layer_5-6a_ExN	0.178411	0.264247	Cortex
1.48823e-26	0.100793	0.737	0.653	7.45601e-24	DS_vs_WT	Lmnb1	5.56367e-26	TRUE	Layer_5-6a_ExN	3.82076	4.1696	Cortex
7.60848e-24	0.100184	0.299	0.228	3.81185e-21	DS_vs_WT	Grip1	2.40112e-23	TRUE	Layer_5-6a_ExN	0.770249	0.897549	Cortex
8.16137e-29	0.0997235	0.604	0.512	4.08885e-26	DS_vs_WT	Dtx4	3.47932e-28	FALSE	Layer_5-6a_ExN	2.7936	3.0651	Cortex
4.77347e-30	0.0996995	0.211	0.144	2.39151e-27	DS_vs_WT	Ikbkg	2.23068e-29	FALSE	Layer_5-6a_ExN	0.453387	0.557377	Cortex
2.36112e-14	0.0941685	0.691	0.627	1.18292e-11	DS_vs_WT	Mtor	5.36218e-14	FALSE	Layer_5-6a_ExN	3.26202	3.54949	Cortex
7.63948e-35	0.0870696	0.102	0.052	3.82738e-32	DS_vs_WT	Alkbh5	4.21907e-34	FALSE	Layer_5-6a_ExN	0.160966	0.23319	Cortex
5.50623e-11	0.0812237	0.266	0.219	2.75862e-08	DS_vs_WT	Clu	1.04532e-10	FALSE	Layer_5-6a_ExN	0.764027	0.86619	Cortex
3.51885e-13	0.0749309	0.061	0.034	1.76295e-10	DS_vs_WT	Fzd8	7.43549e-13	FALSE	Layer_5-6a_ExN	0.0897547	0.14785	Cortex
9.76222e-13	0.0732605	0.122	0.086	4.89087e-10	DS_vs_WT	Sirt3	2.02754e-12	FALSE	Layer_5-6a_ExN	0.239302	0.303859	Cortex
1.52124e-15	0.0712582	0.074	0.043	7.62141e-13	DS_vs_WT	Acads	3.69661e-15	FALSE	Layer_5-6a_ExN	0.116804	0.17335	Cortex
7.21106e-09	0.0703356	0.092	0.065	3.61274e-06	DS_vs_WT	Irf9	1.2002e-08	FALSE	Layer_5-6a_ExN	0.164771	0.222964	Cortex
8.35375e-11	0.0689522	0.09	0.061	4.18523e-08	DS_vs_WT	Tle1	1.57285e-10	FALSE	Layer_5-6a_ExN	0.180097	0.237868	Cortex
1.2722e-14	0.0684803	0.198	0.152	6.37372e-12	DS_vs_WT	Trp53	3.0014e-14	FALSE	Layer_5-6a_ExN	0.47612	0.547876	Cortex
2.43319e-10	0.0684185	0.16	0.124	1.21903e-07	DS_vs_WT	Nrf1	4.44561e-10	FALSE	Layer_5-6a_ExN	0.346898	0.412312	Cortex
1.38671e-15	0.0679042	0.167	0.123	6.94743e-13	DS_vs_WT	Mdm2	3.40375e-15	FALSE	Layer_5-6a_ExN	0.355443	0.420766	Cortex
8.56466e-14	0.0665635	0.051	0.026	4.2909e-11	DS_vs_WT	Sox10	1.89201e-13	FALSE	Layer_5-6a_ExN	0.0630931	0.113292	Cortex
4.52963e-08	0.0610352	0.066	0.044	2.26934e-05	DS_vs_WT	Psmb5	7.01083e-08	FALSE	Layer_5-6a_ExN	0.124315	0.172901	Cortex
1.04307e-29	0.0596298	0.602	0.514	5.22576e-27	DS_vs_WT	Cnr1	4.6938e-29	FALSE	Layer_5-6a_ExN	3.2619	3.44174	Cortex
3.14499e-27	0.0583911	0.518	0.437	1.57564e-24	DS_vs_WT	Smurf1	1.23263e-26	FALSE	Layer_5-6a_ExN	1.87374	1.99244	Cortex
3.12852e-27	0.0561456	0.434	0.357	1.56739e-24	DS_vs_WT	Pink1	1.23263e-26	FALSE	Layer_5-6a_ExN	1.36849	1.46248	Cortex
1.67545e-08	0.056066	0.062	0.04	8.39401e-06	DS_vs_WT	Aldh4a1	2.69626e-08	FALSE	Layer_5-6a_ExN	0.107586	0.151476	Cortex
1.71787e-26	0.0559791	0.459	0.379	8.60652e-24	DS_vs_WT	Gria1	6.23048e-26	FALSE	Layer_5-6a_ExN	2.30213	2.43278	Cortex
3.51566e-12	0.0554765	0.099	0.068	1.76135e-09	DS_vs_WT	Irf3	7.00251e-12	FALSE	Layer_5-6a_ExN	0.190993	0.237682	Cortex
2.27557e-06	0.0542846	0.243	0.209	0.00114006	DS_vs_WT	Vegfa	3.2337e-06	FALSE	Layer_5-6a_ExN	0.68892	0.75368	Cortex
1.40847e-13	0.0528081	0.116	0.083	7.05645e-11	DS_vs_WT	Pdgfra	3.02884e-13	FALSE	Layer_5-6a_ExN	0.283984	0.331853	Cortex
3.9928e-05	0.0513438	0.1	0.079	0.0200039	DS_vs_WT	Ddit3	5.18851e-05	FALSE	Layer_5-6a_ExN	0.228618	0.27313	Cortex
[truncated: 2,316 more rows]

## Sheet: P0_CC_Cellsubtype
p_val	avg_log2FC	pct.1	pct.2	p_val_adj	comparison	gene	FDR	sig	celltype	exp.1	exp.2	Region
[truncated: 1,672 more rows]

[truncated: 9 more sheets: P0_CC_Celltype, P0_SVZ_Celltype, P0_Cortex_Celltype, 6mo_CC_Celltype, 6mo_Cortex_Celltype, 6mo_SVZ_Celltype, 6mo_CC_Cellsubtype, 6mo_Cortex_Cellsubtype, 6mo_SVZ_Cellsubtype]
