# Supplementary material for: Molecular Cartography of the Human and Mouse Down Syndrome Brain
Source: Research Square preprint supplement (doi:10.21203/rs.3.rs-5374449/v1), 2024-11-14
Supplement: Supplementary file 3 [file 3fd82b4462875a1669a9b677.xlsx]

## Sheet: Sheet1
Gene Name	NCBI Name	Cell Type
CD11b	Itgam	Microglia
Cx3cr1	Cx3cr1	Microglia
Csf1R	Csf1r	Microglia
Aif1	Aif1	Microglia
Tmem119c11	Tmem119	Microglia (Activated)
Trem2	Trem2	Microglia (Activated)
Slc1a3	Slc1a3	Astrocyte
Gfap	Gfap	Astrocyte
Aldh1l1	d3	Astrocyte
Clu	Clu	Astrocyte
Aqp4	Aqp4	Astrocyte
S100b	S100b	Astrocyte
Olig2	Olig2	Oligodendrocyte
CNP	Cnp	Oligodendrocyte
Plp1	Plp1	Oligodendrocyte
Ng2	Cspg4	OPC/Pericyte
Sox10	Sox10	OPC
Pdgfra	Pdgfra	OPC
MBP	Mbp	Myelin
MAG	Mag	Myelin
GRIP1	Grip1	Neuron
NeuN	Rbfox3	Neuron
MAP2	Map2	Neuron
Dcx	Dcx	Neuron (Neurogenesis)
NeuroD1	Neurod1	Neuron
Tau	Mapt	Neuron
β-III Tubulin	Tubb3	Neuron
NLGN-1	Nlgn1	Neuron
NLGN-2	Nlgn2	Neuron
Slc17a6	Slc17a6	Neuron
Slc17a7	Slc17a7	Excitatory Neuron
Psd95	Dlg4	Excitatory Neuron
Gad1	Gad1	Inhibitory Neuron
Gad2	Gad2	Inhibitory Neuron
GABA R1	Gabra1	Inhibitory Neuron
GABA R1	Gabbr1	Inhibitory Neuron
GABAB R2	Gabrg2	Inhibitory Neuron
Foxj1	Foxj1	Ependymal Cell
Cdh5	Cdh5	Ependymal Cell
Prlr	Prlr	Choroid Plexus
Pecam1	Pecam1	Endothelial Cell
Esam	Esam	Endothelial Cell
Cldn5	Cldn5	Endothelial Cell
Cd62L	Sell	Monocyte
Cd43	Spn	Monocyte
CCR2	Ccr2	Monocyte
Ly6	Ly6c1	Monocyte
Cd45	Ptprc	Non-parenchymal macrophage
Lyve1	Lyve1	Non-parenchymal macrophage
Cd206	Mrc1	Non-parenchymal macrophage
Siglec-1	Siglec1	Non-parenchymal macrophage
Cd36	Cd63	Non-parenchymal macrophage
Sall1	Sall1	Non-parenchymal macrophage
Siglec-H	Siglech	Non-parenchymal macrophage
Cd14	Cd14	Microglia
Cd16	Fcgr3	Microglia
Cd32	Fcgr2b	Microglia
Cd64	Fcgr1	Microglia
Ccl22	Ccl22	Microglia
Cd33	Cd33	Microglia
Pvalb	Pvalb	Inhibitory Neuron Subtype
Sst	Sst	Inhibitory Neuron Subtype
Vip	Vip	Inhibitory Neuron Subtype
Cck	Cck	Inhibitory Neuron Subtype
Lamp5	Lamp5	Inhibitory Neuron Subtype
Cnr1	Cnr1	Inhibitory Neuron Subtype
Prox1	Prox1	Inhibitory Neuron Subtype
Arx	Arx	Inhibitory Neuron Subtype
Reln	Reln	Inhibitory Neuron Subtype
Calb1	Calb1	Inhibitory Neuron Subtype
Calb2	Calb2	Inhibitory Neuron Subtype
Lhx6	Lhx6	Inhibitory Neuron Subtype
Npy	Npy	Inhibitory Neuron Subtype
Pnoc	Pnoc	Inhibitory Neuron Subtype
Pdgfrb	Pdgfrb	Pericyte
Atp13a5	Atp13a5	Pericyte
Anpep	Anpep	Pericyte
Kcnj8	Kcnj8	Pericyte
Abcc9	Abcc9	Pericyte
Col1a1	Col1a1	Fibroblast
Col1a2	Col1a2	Fibroblast
Fbln1	Fbln1	Fibroblast
Fbln2	Fbln2	Fibroblast
Fn1	Fn1	Fibroblast
Rln	Rln	Layer I (Excitatory)
Rgs8	Rgs8	Layer II-III (Excitatory)
Cartpt	Cartpt	Layer II-III (Excitatory)
Tle1	Tle1	Layer II-III (Excitatory)
Tle3	Tle3	Layer II-III (Excitatory)
Lhx2	Lhx2	Layer II-IV (Excitatory)
Unc5d	Unc5d	Layer II-IV (Excitatory)
Mef2c	Mef2c	Layer II-IV (Excitatory)
Dtx4	Dtx4	Layer II-IV (Excitatory)
Cux1	Cux1	Layer II-IV (Excitatory)
Cux2	Cux2	Layer II-IV (Excitatory)
Kitl	Kitl	Layer II-IV (Excitatory)
Satb2	Satb2	Upper Layer (Excitatory)
Pou3f3	Pou3f3	Upper Layer (Excitatory)
Cntn6	Cntn6	Layer Va-Vb (Excitatory)
Foxo1	Foxo1	Layer Va-Vb (Excitatory)
Opn3	Opn3	Layer Va-Vb (Excitatory)
Lix1	Lix1	Layer Va-Vb (Excitatory)
Syt9	Syt9	Layer Va-Vb (Excitatory)
S100a10	S100a10	Layer Va-Vb (Excitatory)
Crym	Crym	Layer V-VI (Excitatory)
Otx1	Otx1	Layer V-VI (Excitatory)
Sox5	Sox5	Layer V-VI (Excitatory)
Dkk3	Dkk3	Layer V-VI (Excitatory)
Tle4	Tle4	Layer V-VI (Excitatory)
Ctgf	Ccn2	Layer SP (Excitatory)
Nr4a2	Nr4a2	Layer SP (Excitatory)
Cd68	Cd68	Layer SP (Excitatory)
IL21	Il21	Cd4+ Tregs (Tfh)
Ccr5	Ccr5	Cd4+ Tregs (Th1)
Lamp1	Lamp1	Phagocytosis Marker
Eotaxin-1	Ccl11	Pro-Inflammatory Cytokine
Eotaxin-2	Ccl24	Pro-Inflammatory Cytokine
Fractalkin	Cx3cl1	Pro-Inflammatory Cytokine
Tgf-β1	Tgfb1	Pro-Inflammatory Cytokine
Tgf-β2	Tgfb2	Pro-Inflammatory Cytokine
TNFR1	Tnfrsf1a	Pro-Inflammatory Receptor
Tnf-α	Tnf	Pro-Inflammatory Cytokine
H2-D	H2-D1	Mhc Class I
H2-K	H2-K1	Mhc Class I
H2-OA	H2-Oa	Mhc Class II
H2-OB	H2-Ob	Mhc Class II
H2-E	H2-Eb1	Mhc Class II
H2-DMb1	H2-DMb1	Mhc Class II
H2-DMb2	H2-DMb2	Mhc Class II
IL1-α	Il1a	Pro-Inflammatory Cytokine
IL1-β	Il1b	Pro-Inflammatory Cytokine
C1qa	C1qa	Complement
C1qb	C1qb	Complement
C1qc	C1qc	Complement
Notch1	Notch1	Immune Recognition
Notch2	Notch2	Immune Recognition
Notch3	Notch3	Immune Recognition
Act1	Traf3ip2	Immune Recognition
Cd4	Cd4	T-Cell
Cd8	Cd8a	T-Cell
Cd8	Cd8b1	T-Cell
Cd80	Cd80	Immune Recognition
Cd163	Cd163	Immune Recognition
Cd209	Cd209a	Immune Recognition
Cd121a (IL1R)	Il1r1	Cytokine Receptor
Il18	Il18	Cytokine Receptor
Cd25 (IL2R)	Il2ra	Cytokine Receptor
Cd124 (IL4R)	Il4ra	Cytokine Receptor
CD127 (IL7R)	Il7r	Cytokine Receptor
Cd122 (IL15R)	Il15ra	Cytokine Receptor
Cd123 (IL3R)	Csf2rb	Cytokine Receptor
Cd125 (IL5R)	Il5ra	Cytokine Receptor
Cd116 (GM-CSFR)	Csf2ra	Cytokine Receptor
Cd212 (IL12R)	Il12rb1	Cytokine Receptor
Cd210 (IL10R)	Il10ra	Cytokine Receptor
Cd118 (IFNa/bR)	Lifr	Cytokine Receptor
Cd119 (IFNgR)	Ifngr1	Cytokine Receptor
GBP2	Gbp2	Pro-Inflammatory Cytokine
JAK1	Jak1	Inflammatory Kinase
JAK2	Jak2	Inflammatory Kinase
TYK2	Tyk2	Inflammatory Kinase
Fas	Fas	Cytotoxic Cell Death
Caspase 7	Casp7	Cytotoxic Cell Death
STAT1	Stat1	Transcription Factor
IRF2	Irf2	Inflammatory Transcription Factor
IRF7	Irf7	Inflammatory Transcription Factor
IRF9	Irf9	Inflammatory Transcription Factor
PSME1	Psme1	Proteosome subunit
TAP1	Tap1	Immune Recognition
TAP2	Tap2	Immune Recognition
TAPBP	Tapbp	Immune Recognition
CTSS	Ctss	Immune Recognition
ERAP1	Erap1	Immune Recognition
B2M	B2m	Immune Recognition
RFX5	Rfx5	Immune Recognition
CD74	Cd74	Immune Recognition
Ifnar1	Ifnar1	Interferon Signaling
Ifnar2	Ifnar2	Interferon Signaling
Stat2	Stat2	Interferon Signaling
ISG15	Isg15	ISG (IFN Stimulated Gene)
2024-09-27	Ifitm1	ISG (IFN Stimulated Gene)
1-8U	Ifitm3	ISG (IFN Stimulated Gene)
1-8D	Ifitm2	ISG (IFN Stimulated Gene)
Ifit1	Ifit1	ISG (IFN Stimulated Gene)
Ifit2	Ifit2	ISG (IFN Stimulated Gene)
Mx1	Mx1	ISG (IFN Stimulated Gene)
Mx2	Mx2	ISG (IFN Stimulated Gene)
PKR	Eif2ak2	ISG (IFN Stimulated Gene)
IL-15	Il15	Senescence
GRO-α	Cxcl1	Senescence
MCP-2	Ccl8	Senescence
MIP-1a	Ccl3	Senescence
IGFBP-2/3/4/5/6	Igfbp2	Senescence
ICAM1	Icam1	Senescence
IFI27	Ifi27	Senescence
MMP12	Mmp12	Senescence
Myd88	Myd88	Senescence
IRF5	Irf5	Senescence
Teck	Ccl25	Senescence
I-Tac	Cxcl11	Senescence
MIF	Mif	Senescence
sTNFRII	Tnfrsf1b	Senescence
uPAR	Plaur	Senescence
EGF-R	Egfr	Senescence
EGF	Egf	Senescence
NF-κB	Nfkb1	Senescence/Cytokine
Sirt1	Sirt1	Senescence
Dpp4	Dpp4	Cell Surface Marker
Glb1 (SA-βgal)	Glb1	Senescence
Fgf2	Fgf2	Senescence
Vegfa	Vegfa	Senescence
VegfR	Flt1	Senescence
Fgfr2	Fgfr2	Senescence
Bcl-w (Bcl2l2)	Bcl2l2	Senescence
Serpine1	Serpine1	Senescence
p53	Trp53	Senescence
p38MAPK	Mapk14	Senescence
Ccna2	Ccna2	Senescence
Ccne2	Ccne2	Senescence
Lmnb1	Lmnb1	Senescence
p21(WAF/CIP)	Cdkn1a	Senescence
Cdk2b	Cdkn2b	Senescence
Cdkn1c	Cdkn1c	Senescence
Mdm2	Mdm2	DNA Damage
Gadd45a	Gadd45a	DNA Damage
γH2AX	H2afx	DNA Damage
Nbs1	Nbn	DNA Damage
Rad50	Rad50	DNA Damage
Mri1	Mri1	DNA Damage
Rad1	Rad1	DNA Damage
Rad9	Rad9a	DNA Damage
Hus1	Hus1	DNA Damage
Atrip	Atrip	DNA Damage
Atr	Atr	DNA Damage
53Bp1	Trp53bp1	DNA Damage
Chk2	Chek2	DNA Damage
Topbp1	Topbp1	DNA Damage
Claspin	Clspn	DNA Damage
Chk1	Chek1	DNA Damage
Plk3	Plk3	DNA Damage
Nlrp3	Nlrp3	Inflammasome Activation
Nlrc4	Nlrc4	Inflammasome Activation
ASC	Pycard	Inflammasome Activation
Caspase 1	Casp1	Inflammasome Activation
Caspase 4	Casp4	Inflammasome Activation
Gsdmd	Gsdmd	Inflammasome Activation
Hmgb1	Hmgb1	Inflammasome Activation
Nos2	Nos2	Inflammasome Activation
Prdx6	Prdx6	Oxidative Stress
Gch1	Gch1	Oxidative Stress
Gpx1	Gpx1	Oxidative Stress
Sod2	Sod2	Oxidative Stress
Prdx1	Prdx1	Oxidative Stress
Txnrd1	Txnrd1	Oxidative Stress
Dynll1	Dynll1	Oxidative Stress
Prdx5	Prdx5	Oxidative Stress
Nfe2l2	Nfe2l2	Oxidative Stress
Ptgs2	Ptgs2	Oxidative Stress
Pid1	Pid1	Oxidative Stress
Itgb2	Itgb2	Oxidative Stress
Cd47	Cd47	Oxidative Stress
Tlr2	Tlr2	Oxidative Stress
Cflar	Cflar	Oxidative Stress
Cyba	Cyba	Oxidative Stress
Cycs	Cycs	Oxidative Stress
Rac1	Rac1	Oxidative Stress
Xdh	Xdh	Oxidative Stress
Pdk3	Pdk3	Oxidative Stress
Ncf2	Ncf2	Oxidative Stress
Ncf4	Ncf4	Oxidative Stress
Tspo	Tspo	Oxidative Stress
Slc7a2	Slc7a2	Oxidative Stress
Ggt1	Ggt1	Oxidative Stress
Ggt7	Ggt7	Oxidative Stress
Gsr	Gsr	Oxidative Stress
Gsto1	Gsto1	Oxidative Stress
Gstt2	Gstt2	Oxidative Stress
Gstm1	Gstm1	Oxidative Stress
Gstk1	Gstk1	Oxidative Stress
Gpx7	Gpx7	Oxidative Stress
Prdx2	Prdx2	Oxidative Stress
Sod3	Sod3	Oxidative Stress
Txnrd3	Txnrd3	Oxidative Stress
Tbk1	Tbk1	cGAS-STING
Rela-p50	Rela	cGAS-STING
Relb-p52	Relb	cGAS-STING
Psmb1	Psmb1	20S Proteasome Subunit
Psmb2	Psmb2	20S Proteasome Subunit
Psmb5	Psmb5	20S Proteasome Subunit
Lmp2	Psmb9	20S Proteasome Subunit
Lmp7	Psmb8	20S Proteasome Subunit
Mecl-1	Psmb10	20S Proteasome Subunit
Pink1	Pink1	Mitochondrial Component
Optineurin	Optn	Mitochondrial Component
mTOR	Mtor	Mitochondrial Component
TFAM	Tfam	Mitochondrial Component
Sirt3	Sirt3	Mitochondrial Component
Sirt5	Sirt5	Mitochondrial Component
AMPK	Prkaa1	Mitochondrial Component
Acads	Acads	Fatty Acid β-Oxidation
Acadl	Acadl	Fatty Acid β-Oxidation
Aldh2	Aldh2	Aldehyde Dehydrogenase
Aldh4a1	Aldh4a1	Aldehyde Dehydrogenase
Aldh9a1	Aldh9a1	Aldehyde Dehydrogenase
Anxa6	Anxa6	Aldehyde Dehydrogenase
Dgat1	Dgat1	Triglyceride Synthesis
Fuca1	Fuca1	Glycolipid Processing
Galc	Galc	Glycolipid Processing
Gba	Gba	Glycolipid Processing
Gusb	Gusb	Glycolipid Processing
Sod1	Sod1	Redox Regulator
Smpd1	Smpd1	Lysosomal Acid
Acot2	Acot2	Fatty Acid Biosynthesis
Cpt1c	Cpt1c	Fatty Acid Biosynthesis
Pld3	Pld3	Fatty Acid Biosynthesis
Lrp1	Lrp1	LDL Receptor
Pex1	Pex1	Lipid Regulatory Protein
Plin2	Plin2	Lipid Regulatory Protein
K-Ras	Kras	Oncogene Pathway
N-Ras	Nras	Oncogene Pathway
H-Ras	Hras	Oncogene Pathway
Raf	Zhx2	Oncogene Pathway
Arf	Arf1	Oncogene Pathway
Prak	Mapkapk5	Oncogene Pathway
Braf	Braf	Oncogene Pathway
Mek	Mdk	Oncogene Pathway
Erk	Mapk1	Oncogene Pathway
Fto	Fto	m6A Regulators
Mettl3	Mettl3	m6A Regulators
Ythdc1	Ythdc1	m6A Regulators
Mettl14	Mettl14	m6A Regulators
Alkbh5	Alkbh5	m6A Regulators
Ythdc2	Ythdc2	m6A Regulators
Ythdf1	Ythdf1	m6A Regulators
Ythdf2	Ythdf2	m6A Regulators
WTAP	Wtap	m6A Regulators
MAVS	Mavs	MAVS Signaling Protein
Traf2	Traf2	MAVS Signaling Protein
Traf3	Traf3	MAVS Signaling Protein
Traf5	Traf5	MAVS Signaling Protein
Traf6	Traf6	MAVS Signaling Protein
NEMO	Ikbkg	MAVS Signaling Protein
Ikkα	Chuk	MAVS Signaling Protein
Ikkβ	Ikbkb	MAVS Signaling Protein
IRF3	Irf3	MAVS Signaling Protein
OTUD4	Otud4	Activation of MAVS
OGT	Ogt	Activation of MAVS
TRIM21	Trim21	Activation of MAVS
TRIM25	Trim25	MAVS Ubiquitination
AIP4	Itch	MAVS Ubiquitination
Smurf1	Smurf1	MAVS Ubiquitination
Smurf2	Smurf2	MAVS Ubiquitination
RNF5	Rnf5	MAVS Ubiquitination
Wnt3	Wnt3	Wnt Ligand
Wnt7a	Wnt7a	Wnt Ligand
Wnt7b	Wnt7b	Wnt Ligand
Lrp5	Lrp5	Wnt Pathway
Lrp6	Lrp6	Wnt Pathway
Dvl	Dvl1	Wnt Pathway
APC	Apc	Wnt Pathway
Axin1	Axin1	Wnt Pathway
Axin2	Axin2	Wnt Pathway
GSK3β	Gsk3b	Wnt Pathway
CK1α	Csnk1a1	Wnt Pathway
Lef1	Lef1	Wnt Pathway
β-catenin	Ctnnb1	β-catenin
Fzd4	Fzd4	Fzd Receptor
Fzd5	Fzd5	Fzd Receptor
Fzd7	Fzd7	Fzd Receptor
Fzd8	Fzd8	Fzd Receptor
CyclinD1	Ccnd1	Wnt Target Gene
c-Myc	Myc	Wnt Target Gene
Lum	Lum	Fibroblast
Lhx5	Lhx5	Layer I (Excitatory)
Mdga1	Mdga1	Layer II-III (Excitatory)
Gpr6	Gpr6	Layer II-IV (Excitatory)
Perforin	Prf1	Cd8+ Killer T-Cells (Cytotoxic)
Ccr3	Ccr3	Cd4+ Tregs (Th9)
Ccr6	Ccr6	Cd4+ Tregs (Th17)
Ccr10	Ccr10	Cd4+ Tregs (Th22)
Cxcl13	Cxcl13	Pro-Inflammatory Cytokine
CD30L	Tnfsf8	Pro-Inflammatory Cytokine
IL-2	Il2	Pro-Inflammatory Cytokine
IL-4	Il4	Pro-Inflammatory Cytokine
PGE2	Ptger2	Pro-Inflammatory Prostaglandin
Cxcl2/GRO-β	Cxcl2	Pro-Inflammatory Cytokine
IL-6	Il6	Pro-Inflammatory Cytokine
C4a	C4a	Complement
C4b	C4b	Complement
Il18Ra	Il18r1	Cytokine Receptor
CD132 (IL9R)	Il9r	Cytokine Receptor
Cd213 (IL13R)	Il13ra2	Cytokine Receptor
Cxcl10	Cxcl10	Pro-Inflammatory Cytokine
FasL	Fasl	Cytotoxic Cell Death
Caspase 3	Casp3	Cytotoxic Cell Death
CIITA	Ciita	Immune Recognition
IFNβ	Ifnb1	Interferon Signaling
Ifi6-16	Ifitm6	ISG (IFN Stimulated Gene)
IL-13	Il13	Senescence
MIP-3a	Ccl20	Senescence
Ena-78	Cxcl5	Senescence
OPG	Tnfrsf11b	Senescence
p16(INK4a)/p19ARF	Cdkn2a	Senescence
Atm	Atm	DNA Damage
Nlrp1	Nlrp1a	Inflammasome Activation
Aim2	Aim2	Inflammasome Activation
Pyrin	Mefv	Inflammasome Activation
Arg2	Arg2	Oxidative Stress
Mettl4	Mettl4	m6A Regulators
IKKi/ε	Ikbke	MAVS Signaling Protein
TRIM31	Trim31	Activation of MAVS
Wnt1	Wnt1	Wnt Ligand
Versican	Vcan	CSPG
Brevican	Bcan	CSPG
Aggrecan	Acan	CSPG
Neurocan	Ncan	CSPG
Has	Has1	ECM Protein
Tenascin-C	Tnc	CSPG
Tenascin-R	Tnr	CSPG
Line1 (L1Md-A102)	pOrf1/2	L1 Transcript
Bdnf	Bdnf	Growth factor
Shh	Shh	Shh Signaling Component
SuFu	Sufu	Shh Signaling Component
Gli1	Gli1	Shh Signaling Component
Gli2	Gli2	Shh Signaling Component
Gli3	Gli3	Shh Signaling Component
Kif7	Kif7	Shh Signaling Component
Apoe2/4	Apoe	Lipoprotein Generation
App	App	Alzheimer's Disease
Dyrk1a	Dyrk1a	CNS Development
Gria1	Gria1	AMPA Subunit
Gria4	Gria4	AMPA Subunit
Syn1	Syn1	Synaptic Vesicles
Homer1	Homer1	Scaffolding Protein
Psen1	Psen1	Alzheimer's Disease
Nos1	Nos1	Nitric Oxide Synthesis
Npc1	Npc1	Membrane Transporter
Npc2	Npc2	Membrane Transporter
Gpr17	Gpr17	GPCR
CR1	Cr2	Complement Receptor
CR1L	Cr1l	Complement Receptor
Apoc1	Apoc1	Lipoproteins
Crebbp	Crebbp	CREB
Ep300	Ep300	Histone Modification
Osm	Osm	Oncostatin M
Osmr	Osmr	Oncostatin M receptor
Rcan1	Rcan1	Signaling Pathway
Cebpb	Cebpb	Transcription Factor
Sp1	Sp1	Transcription Factor
Lif	Lif	Leukemia inhibitory factor
HIF1A	Hif1a	Oxidative Stress
Parkin	Eef1aknmt	m6A Regulators
Il6ra	Il6ra	Cytokine Receptor
Aars1	Aars	tRNA synthetase
Aars2	Aars2	tRNA synthetase
Dars2	Dars2	tRNA synthetase
Qars1	Qars	tRNA synthetase
Rars1	Rars	tRNA synthetase
Vars1	Vars	tRNA synthetase
Vars2	Vars2	tRNA synthetase
Sars1	Sars	tRNA synthetase
Wars1	Wars	tRNA synthetase
Mki67	Mki67	Proliferation marker
Nusap1	Nusap1	Proliferation marker
Thbs 1	Thbs1	Secreted glycoprotein
Nox1	Nox1	NADPH oxidase 1
Thbs4	Thbs4	Neural Precursors (NSCs)
Fabp7	Fabp7	Neural Precursors (NSCs + RPs)
Hes1	Hes1	Neural Precursors (NSCs + RPs)
Vcam1	Vcam1	Neural Precursors (NSCs)
Sp8	Sp8	Olfactory bulb neuroblasts
Ascl1	Ascl1	TAPs
Agt	Agt	Astrocytes
Ldlr	Ldlr	Receptor
SorLA	Sorl1	Receptor
Hsf1	Hsf1	Proteostasis network modulator
Grp94	Hsp90b1	Unfolded protein response
Chop/Gadd153	Ddit3	Unfolded protein response
Atf6	Atf6	Unfolded protein response
PDI	Pdia3	Unfolded protein response
Xbp1	Xbp1	Unfolded protein response
Ptprd	Ptprd	phosphatase
Hsp70	Hspa1a	Proteastasis component
Mecp2	Mecp2	Epigenetic regulation
Creb1	Creb1	Transcription Factor; cAMP pathway
Pgc1	Ppargc1a
Nrf1	Nrf1	Transcription Factor
Eif4e	Eif4e	RNA (cap) binding protein
Eif4g	Eif4g1	Scaffolding protein
Lamp2a	Lamp2	Mediating lysosomal degradation
Hsc70	Hspa8	Chaperone
Ccr7	Ccr7	Cd4+ Tregs (Naive)
Il17ra	Il17ra	Cytokine receptor
Cxcr5	Cxcr5	Cd4+ Tregs (Tfh)
Nmdar1	Grin1	Excitatory Neuron
Nmdar2b	Grin2b	Excitatory Neuron
Csf3r	Csf3r	Inflammatory mediator
Cxcr4	Cxcr4	Inflammatory mediator
Cxcl12	Cxcl12	Inflammatory mediator
Ptch1	Ptch1	Shh Receptor
