# Supplementary material for: Molecular Cartography of the Human and Mouse Down Syndrome Brain
Source: Research Square preprint supplement (doi:10.21203/rs.3.rs-5374449/v1), 2024-11-14
Supplement: Supplementary file 4 [file 5d4c50f019f3584a9c91999c.xlsx]

## Sheet: IP_IN
p_val	avg_log2FC	pct.1	pct.2	p_val_adj	comparison	gene	FDR	sig	celltype	exp.2	exp.1
1.01188e-48	1.60269	0.872	0.636	2.69231e-44	DS_vs_CTL	LINC00461	7.76111e-45	TRUE	IP_IN	4.77528	14.4991
3.10555e-42	2.06227	0.835	0.493	8.26293e-38	DS_vs_CTL	PTPRD	1.19098e-38	TRUE	IP_IN	2.81197	11.741
9.71229e-39	4.33269	0.311	0.05	2.58415e-34	DS_vs_CTL	LDLRAD4	2.48311e-35	TRUE	IP_IN	0.15443	3.12077
2.38953e-38	-1.44306	0.78	0.971	6.35782e-34	DS_vs_CTL	LSAMP	3.69987e-35	TRUE	IP_IN	44.8929	16.5052
2.41191e-38	-1.27571	0.537	0.92	6.41737e-34	DS_vs_CTL	SOX6	3.69987e-35	TRUE	IP_IN	36.8151	15.1997
1.68082e-37	4.5898	0.311	0.04	4.47216e-33	DS_vs_CTL	SATB2	2.14865e-34	TRUE	IP_IN	0.0730185	1.77031
1.7376e-36	-1.91693	0.409	0.849	4.62322e-32	DS_vs_CTL	AC092691.1	1.90391e-33	TRUE	IP_IN	18.2503	4.82711
1.552e-35	0.159436	0.604	0.161	4.12941e-31	DS_vs_CTL	RBFOX1	1.48798e-32	FALSE	IP_IN	4.55655	5.08372
3.02471e-35	-2.53575	0.165	0.664	8.04785e-31	DS_vs_CTL	ZNF536	2.57773e-32	TRUE	IP_IN	9.07209	1.55852
4.01983e-32	1.33859	0.988	0.92	1.06956e-27	DS_vs_CTL	ROBO2	3.08321e-29	TRUE	IP_IN	17.9208	45.318
4.62276e-29	5.18934	0.232	0.019	1.22998e-24	DS_vs_CTL	DSCAM	3.22332e-26	TRUE	IP_IN	0.0369091	1.36803
1.16509e-28	-3.37833	0.049	0.46	3.09996e-24	DS_vs_CTL	ARL17B	7.44687e-26	TRUE	IP_IN	2.99846	0.282323
2.58268e-28	1.81124	0.616	0.384	6.87173e-24	DS_vs_CTL	FOXP2	1.52378e-25	TRUE	IP_IN	3.74663	13.1451
1.75424e-26	-1.44336	0.476	0.843	4.66751e-22	DS_vs_CTL	STXBP5L	9.61073e-24	TRUE	IP_IN	13.134	4.82371
5.63126e-26	-0.843982	0.695	0.957	1.49831e-21	DS_vs_CTL	ZSWIM5	2.87945e-23	TRUE	IP_IN	20.7926	11.578
1.78616e-25	-0.916683	0.75	0.962	4.75244e-21	DS_vs_CTL	GPC6	8.56241e-23	TRUE	IP_IN	34.8507	18.4556
1.55788e-24	-1.39996	0.323	0.739	4.14506e-20	DS_vs_CTL	PDGFD	7.0288e-22	TRUE	IP_IN	9.44882	3.57473
2.63204e-24	2.23457	0.402	0.143	7.00307e-20	DS_vs_CTL	ZFHX4	1.07924e-21	TRUE	IP_IN	0.765562	3.60033
2.67347e-24	-1.51088	0.262	0.684	7.1133e-20	DS_vs_CTL	SACS	1.07924e-21	TRUE	IP_IN	6.54451	2.29061
1.00811e-23	-1.87948	0.274	0.681	2.68228e-19	DS_vs_CTL	EPHA5	3.8661e-21	TRUE	IP_IN	7.63064	2.06797
1.07519e-23	2.35816	0.378	0.134	2.86075e-19	DS_vs_CTL	SEL1L3	3.927e-21	TRUE	IP_IN	0.660922	3.38641
6.72632e-23	1.37304	0.726	0.478	1.78967e-18	DS_vs_CTL	STMN2	2.34504e-20	TRUE	IP_IN	2.81241	7.28044
2.41349e-22	1.04845	0.896	0.815	6.42157e-18	DS_vs_CTL	MIR99AHG	8.04846e-20	TRUE	IP_IN	9.48763	19.6187
5.5498e-22	1.21361	0.78	0.589	1.47663e-17	DS_vs_CTL	NFIA	1.77362e-19	TRUE	IP_IN	6.67054	15.4657
6.77627e-22	-0.895946	0.433	0.808	1.80296e-17	DS_vs_CTL	PLXNA2	2.07896e-19	TRUE	IP_IN	9.44092	5.06781
3.71603e-21	2.32594	0.36	0.137	9.88725e-17	DS_vs_CTL	NRG1	1.09623e-18	TRUE	IP_IN	0.502812	2.51872
7.72682e-21	-1.3929	0.238	0.629	2.05588e-16	DS_vs_CTL	DGKB	2.19499e-18	TRUE	IP_IN	6.45403	2.45187
8.58838e-21	1.78586	0.512	0.252	2.28511e-16	DS_vs_CTL	CACNA2D1	2.3526e-18	TRUE	IP_IN	1.42943	4.92549
9.21569e-21	2.43074	0.299	0.112	2.45202e-16	DS_vs_CTL	RALYL	2.43739e-18	TRUE	IP_IN	0.359502	1.93627
1.08243e-20	-2.41317	0.091	0.449	2.88002e-16	DS_vs_CTL	HIST1H4C	2.76741e-18	TRUE	IP_IN	2.84036	0.527302
1.2481e-20	2.62231	0.287	0.11	3.32081e-16	DS_vs_CTL	UNC5D	3.08803e-18	TRUE	IP_IN	0.302079	1.85853
4.17959e-20	-1.03232	0.683	0.911	1.11206e-15	DS_vs_CTL	ELF2	1.0018e-17	TRUE	IP_IN	14.8089	7.23467
5.24041e-20	-1.591	0.299	0.664	1.39432e-15	DS_vs_CTL	PLXNA4	1.218e-17	TRUE	IP_IN	11.2925	3.74261
6.4438e-20	2.143	0.341	0.146	1.7145e-15	DS_vs_CTL	CHL1	1.45365e-17	TRUE	IP_IN	0.632839	2.79235
1.28604e-19	1.88452	0.348	0.166	3.42176e-15	DS_vs_CTL	NFIX	2.81826e-17	TRUE	IP_IN	0.803247	2.96249
8.4646e-19	1.87795	0.494	0.236	2.25218e-14	DS_vs_CTL	GRID2	1.80343e-16	TRUE	IP_IN	1.53707	5.64619
2.56664e-18	2.43096	0.305	0.106	6.82905e-14	DS_vs_CTL	SMOC1	5.32057e-16	TRUE	IP_IN	0.612803	3.3025
3.87612e-18	2.1998	0.299	0.11	1.03132e-13	DS_vs_CTL	MAPT	7.82364e-16	TRUE	IP_IN	0.417026	1.91323
1.13763e-17	-1.63328	0.22	0.575	3.0269e-13	DS_vs_CTL	DACH2	2.23735e-15	TRUE	IP_IN	6.9803	2.24428
1.854e-17	4.42879	0.122	0.025	4.93293e-13	DS_vs_CTL	FRMPD4	3.55504e-15	TRUE	IP_IN	0.032841	0.717393
4.02274e-17	0.940637	0.53	0.48	1.07033e-12	DS_vs_CTL	SERINC5	7.52547e-15	TRUE	IP_IN	3.26689	6.26572
4.45218e-17	1.0571	0.75	0.583	1.18459e-12	DS_vs_CTL	KCNB2	8.13052e-15	TRUE	IP_IN	6.30975	13.1245
1.25237e-16	-0.794247	0.652	0.902	3.33217e-12	DS_vs_CTL	KANSL1	2.23387e-14	TRUE	IP_IN	11.2038	6.45491
1.48189e-16	2.47307	0.28	0.086	3.94286e-12	DS_vs_CTL	GLI3	2.5832e-14	TRUE	IP_IN	0.408339	2.26526
1.57558e-16	2.0883	0.25	0.098	4.19215e-12	DS_vs_CTL	SLC1A2	2.68549e-14	TRUE	IP_IN	0.404262	1.71621
1.71845e-16	3.51438	0.195	0.027	4.57228e-12	DS_vs_CTL	KLHDC8A	2.86533e-14	TRUE	IP_IN	0.108947	1.24742
2.5376e-16	-2.22595	0.079	0.38	6.7518e-12	DS_vs_CTL	KLHL13	4.14115e-14	TRUE	IP_IN	2.91571	0.617319
2.7606e-16	-1.60754	0.299	0.622	7.34512e-12	DS_vs_CTL	EFNA5	4.41121e-14	TRUE	IP_IN	10.962	3.59142
3.20252e-16	1.83577	0.22	0.122	8.52094e-12	DS_vs_CTL	MIR124-2HG	5.01292e-14	TRUE	IP_IN	0.434085	1.54609
3.55962e-16	1.71465	0.451	0.236	9.47107e-12	DS_vs_CTL	NKAIN2	5.46045e-14	TRUE	IP_IN	0.950122	3.11482
6.36445e-16	-0.748544	0.549	0.845	1.69339e-11	DS_vs_CTL	SOX1-OT	9.57163e-14	TRUE	IP_IN	11.1072	6.60539
8.81385e-16	-1.94171	0.079	0.368	2.3451e-11	DS_vs_CTL	NKX2-1	1.30004e-13	TRUE	IP_IN	1.97247	0.507547
9.82286e-16	1.63035	0.433	0.208	2.61357e-11	DS_vs_CTL	SEMA5A	1.42153e-13	TRUE	IP_IN	1.33671	4.13452
2.44866e-15	-1.26782	0.402	0.711	6.51516e-11	DS_vs_CTL	CUX2	3.47801e-13	TRUE	IP_IN	8.50574	3.52654
3.31311e-15	3.0794	0.159	0.054	8.8152e-11	DS_vs_CTL	DPP6	4.62029e-13	TRUE	IP_IN	0.128133	1.08331
6.87204e-15	1.93444	0.244	0.129	1.82844e-10	DS_vs_CTL	GRIA2	9.41225e-13	TRUE	IP_IN	0.38286	1.46017
7.00169e-15	-3.39515	0.018	0.245	1.86294e-10	DS_vs_CTL	AC109927.1	9.42157e-13	TRUE	IP_IN	1.81008	0.166024
7.48006e-15	1.80714	0.323	0.168	1.99022e-10	DS_vs_CTL	FRMD4B	9.89174e-13	TRUE	IP_IN	0.851982	2.97803
1.1256e-14	2.07607	0.329	0.144	2.99489e-10	DS_vs_CTL	CNTNAP2	1.46328e-12	TRUE	IP_IN	0.669595	2.82046
1.27503e-14	0.832247	0.823	0.723	3.39248e-10	DS_vs_CTL	ANK2	1.62992e-12	TRUE	IP_IN	6.36896	11.3349
1.68575e-14	1.56216	0.36	0.197	4.48528e-10	DS_vs_CTL	KIF5C	2.11962e-12	TRUE	IP_IN	0.942748	2.78002
1.83562e-14	1.86791	0.409	0.158	4.88403e-10	DS_vs_CTL	KIRREL3	2.27084e-12	TRUE	IP_IN	1.66389	6.0699
1.97759e-14	0.855084	0.628	0.553	5.26179e-10	DS_vs_CTL	KAT6B	2.40764e-12	TRUE	IP_IN	4.08711	7.38829
2.01219e-14	-0.978635	0.482	0.777	5.35382e-10	DS_vs_CTL	PID1	2.41148e-12	TRUE	IP_IN	10.774	5.46166
2.33561e-14	-0.994344	0.213	0.521	6.21437e-10	DS_vs_CTL	RYBP	2.75603e-12	TRUE	IP_IN	3.81935	1.91146
3.34525e-14	3.31424	0.177	0.043	8.90071e-10	DS_vs_CTL	LRRC4C	3.88759e-12	TRUE	IP_IN	0.104931	1.0451
8.09657e-14	-1.17619	0.335	0.652	2.15425e-09	DS_vs_CTL	PTMA	9.26876e-12	TRUE	IP_IN	4.96745	2.19243
8.38889e-14	-0.632612	0.744	0.935	2.23203e-09	DS_vs_CTL	NCAM1	9.46217e-12	TRUE	IP_IN	18.2608	11.7727
1.32076e-13	3.4581	0.14	0.037	3.51415e-09	DS_vs_CTL	NTRK2	1.46815e-11	TRUE	IP_IN	0.0917376	1.01033
3.19726e-13	-1.05974	0.463	0.749	8.50694e-09	DS_vs_CTL	ST6GALNAC5	3.50328e-11	TRUE	IP_IN	10.2586	4.91548
3.4866e-13	-2.36483	0.049	0.288	9.27681e-09	DS_vs_CTL	SFTA3	3.76652e-11	TRUE	IP_IN	1.61072	0.306753
5.06261e-13	-0.887497	0.28	0.579	1.34701e-08	DS_vs_CTL	TMSB4X	5.39309e-11	TRUE	IP_IN	3.65581	1.97046
1.1822e-12	2.20433	0.226	0.093	3.14549e-08	DS_vs_CTL	PDE1C	1.24212e-10	TRUE	IP_IN	0.477388	2.19746
1.53123e-12	3.19198	0.165	0.032	4.07416e-08	DS_vs_CTL	UST	1.5871e-10	TRUE	IP_IN	0.154894	1.41628
1.91073e-12	-1.52446	0.134	0.408	5.08389e-08	DS_vs_CTL	LINC00354	1.92935e-10	TRUE	IP_IN	2.70829	0.935591
1.91175e-12	-1.36736	0.14	0.408	5.08658e-08	DS_vs_CTL	HMGB2	1.92935e-10	TRUE	IP_IN	2.26937	0.873802
1.93727e-12	2.34963	0.232	0.062	5.1545e-08	DS_vs_CTL	LAMA1	1.92972e-10	TRUE	IP_IN	0.327947	1.66925
2.03957e-12	-1.2301	0.171	0.449	5.42667e-08	DS_vs_CTL	BEST3	2.00557e-10	TRUE	IP_IN	3.3353	1.41602
2.91969e-12	1.21498	0.28	0.214	7.76841e-08	DS_vs_CTL	AC009041.2	2.83468e-10	TRUE	IP_IN	0.859276	1.99035
3.35317e-12	-1.308	0.329	0.614	8.92177e-08	DS_vs_CTL	LHFPL3	3.21485e-10	TRUE	IP_IN	9.1117	3.67425
3.54698e-12	1.81258	0.207	0.135	9.43745e-08	DS_vs_CTL	DAB1	3.35868e-10	TRUE	IP_IN	0.388983	1.36292
4.22146e-12	-0.727647	0.585	0.833	1.1232e-07	DS_vs_CTL	DAPK1	3.94861e-10	TRUE	IP_IN	9.83876	5.93586
5.02261e-12	-0.686089	0.652	0.88	1.33637e-07	DS_vs_CTL	EXOC4	4.64138e-10	TRUE	IP_IN	11.6532	7.23726
5.15397e-12	9.10774	0.067	0	1.37132e-07	DS_vs_CTL	AMBN	4.70606e-10	TRUE	IP_IN	0	0.408091
6.18805e-12	1.01065	0.585	0.426	1.64646e-07	DS_vs_CTL	MTSS1	5.58381e-10	TRUE	IP_IN	2.87097	5.77991
6.3961e-12	4.52006	0.11	0.01	1.70181e-07	DS_vs_CTL	CALY	5.70443e-10	TRUE	IP_IN	0.0292039	0.681192
7.87609e-12	1.22585	0.5	0.33	2.09559e-07	DS_vs_CTL	SLC35F1	6.94364e-10	TRUE	IP_IN	2.53554	5.92611
9.90195e-12	-1.02399	0.152	0.401	2.63461e-07	DS_vs_CTL	RPL30	8.63045e-10	TRUE	IP_IN	2.1335	1.04343
1.09432e-11	-0.761651	0.707	0.896	2.91167e-07	DS_vs_CTL	PBX3	9.43087e-10	TRUE	IP_IN	18.373	10.8311
1.21828e-11	0.810976	0.835	0.824	3.24148e-07	DS_vs_CTL	DLGAP1	1.03825e-09	TRUE	IP_IN	11.0652	19.4079
1.27882e-11	2.55489	0.159	0.047	3.40255e-07	DS_vs_CTL	SEMA3A	1.07786e-09	TRUE	IP_IN	0.163062	0.956506
1.53908e-11	-0.498703	0.244	0.495	4.09503e-07	DS_vs_CTL	GRIK3	1.28312e-09	TRUE	IP_IN	4.08947	2.88873
2.26816e-11	-0.995097	0.378	0.661	6.03491e-07	DS_vs_CTL	TMEM123	1.87063e-09	TRUE	IP_IN	5.05305	2.52941
2.59201e-11	0.977938	0.5	0.403	6.89656e-07	DS_vs_CTL	MLLT3	2.11497e-09	TRUE	IP_IN	2.33845	4.6013
2.76011e-11	-0.761162	0.335	0.615	7.34384e-07	DS_vs_CTL	TET2	2.22843e-09	TRUE	IP_IN	4.58618	2.70029
3.99464e-11	0.871867	0.348	0.31	1.06285e-06	DS_vs_CTL	PTPRZ1	3.17482e-09	TRUE	IP_IN	1.46316	2.6729
4.01509e-11	2.24905	0.201	0.074	1.06829e-06	DS_vs_CTL	LRP1B	3.17482e-09	TRUE	IP_IN	0.236737	1.12285
4.22824e-11	-0.955442	0.128	0.352	1.12501e-06	DS_vs_CTL	H1FX	3.28448e-09	TRUE	IP_IN	1.5438	0.790401
4.23942e-11	-0.9259	0.549	0.795	1.12798e-06	DS_vs_CTL	SOX4	3.28448e-09	TRUE	IP_IN	9.15643	4.8138
4.75826e-11	-1.41216	0.122	0.366	1.26603e-06	DS_vs_CTL	SH3BP4	3.64959e-09	TRUE	IP_IN	2.2588	0.842923
5.49503e-11	-1.70313	0.177	0.439	1.46206e-06	DS_vs_CTL	UBE2E2	4.15694e-09	TRUE	IP_IN	4.25523	1.301
5.52813e-11	0.990863	0.366	0.285	1.47087e-06	DS_vs_CTL	RTN1	4.15694e-09	TRUE	IP_IN	1.26006	2.4996
5.58919e-11	2.85351	0.122	0.033	1.48712e-06	DS_vs_CTL	RGS20	4.16205e-09	TRUE	IP_IN	0.127674	0.922103
5.657e-11	0.777975	0.506	0.483	1.50516e-06	DS_vs_CTL	TUBB2B	4.17204e-09	TRUE	IP_IN	2.62426	4.49507
6.82763e-11	1.34555	0.348	0.206	1.81663e-06	DS_vs_CTL	AKAP6	4.98742e-09	TRUE	IP_IN	1.04743	2.6576
7.30573e-11	2.00303	0.25	0.092	1.94383e-06	DS_vs_CTL	PTPRG	5.28631e-09	TRUE	IP_IN	0.451566	1.80698
8.44486e-11	-0.113741	0.323	0.489	2.24692e-06	DS_vs_CTL	GPBP1	6.05346e-09	FALSE	IP_IN	2.85791	2.63584
8.56718e-11	0.746084	0.762	0.645	2.27947e-06	DS_vs_CTL	MAGI1	6.08428e-09	TRUE	IP_IN	5.50665	9.23109
9.85192e-11	-0.508529	0.848	0.965	2.6213e-06	DS_vs_CTL	ZBTB20	6.88931e-09	TRUE	IP_IN	22.7324	15.9739
9.88037e-11	0.870862	0.573	0.474	2.62887e-06	DS_vs_CTL	SRGAP1	6.88931e-09	TRUE	IP_IN	3.28208	5.99739
1.23649e-10	-0.911515	0.415	0.684	3.28992e-06	DS_vs_CTL	FIGN	8.54401e-09	TRUE	IP_IN	7.25872	3.85323
1.36047e-10	-0.479866	0.945	0.985	3.61979e-06	DS_vs_CTL	NEDD4L	9.31677e-09	TRUE	IP_IN	32.3865	23.217
1.5581e-10	0.5574	0.244	0.288	4.14563e-06	DS_vs_CTL	C1orf61	1.05757e-08	TRUE	IP_IN	1.20363	1.76629
1.86505e-10	-0.618041	0.268	0.508	4.96234e-06	DS_vs_CTL	RPS3A	1.25482e-08	TRUE	IP_IN	2.9234	1.89915
2.00871e-10	3.98683	0.11	0.017	5.34456e-06	DS_vs_CTL	TAFA1	1.33972e-08	TRUE	IP_IN	0.0391762	0.626928
2.02651e-10	1.83719	0.232	0.12	5.39194e-06	DS_vs_CTL	ANK3	1.33994e-08	TRUE	IP_IN	0.420549	1.49927
2.23198e-10	1.30769	0.201	0.131	5.93863e-06	DS_vs_CTL	RRP1B	1.46319e-08	TRUE	IP_IN	0.616903	1.52287
2.3516e-10	-1.49847	0.079	0.29	6.2569e-06	DS_vs_CTL	MEG3	1.52854e-08	TRUE	IP_IN	1.29636	0.452986
2.92975e-10	0.672598	0.72	0.673	7.7952e-06	DS_vs_CTL	TMTC2	1.88834e-08	TRUE	IP_IN	8.94483	14.2526
3.07299e-10	1.16639	0.372	0.239	8.1763e-06	DS_vs_CTL	SNCAIP	1.96415e-08	TRUE	IP_IN	1.29825	2.9095
3.18019e-10	-0.475715	0.671	0.881	8.46152e-06	DS_vs_CTL	TIAM1	2.01587e-08	TRUE	IP_IN	14.1241	10.1513
3.78974e-10	1.22087	0.213	0.155	1.00834e-05	DS_vs_CTL	CNKSR2	2.38257e-08	TRUE	IP_IN	0.675035	1.56907
4.37836e-10	-1.48255	0.14	0.383	1.16495e-05	DS_vs_CTL	ZNF608	2.73025e-08	TRUE	IP_IN	2.49974	0.888714
4.61337e-10	-2.03776	0.067	0.277	1.22748e-05	DS_vs_CTL	CCDC144A	2.85359e-08	TRUE	IP_IN	1.49973	0.359332
4.69941e-10	1.60173	0.268	0.167	1.25037e-05	DS_vs_CTL	GRIK2	2.88356e-08	TRUE	IP_IN	0.632568	1.91607
4.84463e-10	-0.719117	0.268	0.514	1.28901e-05	DS_vs_CTL	CDCA7	2.92827e-08	TRUE	IP_IN	3.39409	2.05616
4.84863e-10	0.675517	0.701	0.619	1.29007e-05	DS_vs_CTL	GNAQ	2.92827e-08	TRUE	IP_IN	5.01465	8.00434
5.01703e-10	3.05982	0.067	0.034	1.33488e-05	DS_vs_CTL	SLC4A10	3.0063e-08	TRUE	IP_IN	0.0671576	0.560168
5.1145e-10	1.06544	0.415	0.279	1.36081e-05	DS_vs_CTL	BACH1	3.04095e-08	TRUE	IP_IN	1.61943	3.38461
5.8508e-10	1.04076	0.561	0.463	1.55672e-05	DS_vs_CTL	MGAT4C	3.45197e-08	TRUE	IP_IN	4.70001	9.6648
5.98841e-10	0.729976	0.64	0.532	1.59334e-05	DS_vs_CTL	APP	3.50619e-08	TRUE	IP_IN	3.47508	5.75895
6.07977e-10	3.96397	0.091	0.017	1.61764e-05	DS_vs_CTL	MAP1LC3A	3.53271e-08	TRUE	IP_IN	0.0271706	0.429627
6.28754e-10	1.73927	0.22	0.096	1.67292e-05	DS_vs_CTL	CDON	3.62597e-08	TRUE	IP_IN	0.456859	1.52171
7.08812e-10	-1.41318	0.183	0.435	1.88594e-05	DS_vs_CTL	AFF2	4.05715e-08	TRUE	IP_IN	3.33458	1.24627
7.48299e-10	0.778436	0.238	0.22	1.991e-05	DS_vs_CTL	NDFIP1	4.25145e-08	TRUE	IP_IN	1.01524	1.73661
7.85929e-10	0.828003	0.543	0.463	2.09112e-05	DS_vs_CTL	MIR100HG	4.43241e-08	TRUE	IP_IN	2.92484	5.18749
8.12567e-10	1.27482	0.213	0.143	2.162e-05	DS_vs_CTL	MEIS3	4.54919e-08	TRUE	IP_IN	0.642291	1.54986
9.84265e-10	1.62182	0.122	0.089	2.61883e-05	DS_vs_CTL	LIMCH1	5.47052e-08	TRUE	IP_IN	0.244742	0.749437
1.02682e-09	0.988893	0.445	0.331	2.73206e-05	DS_vs_CTL	FOXP1	5.66598e-08	TRUE	IP_IN	2.14237	4.24728
1.10459e-09	-0.301281	0.683	0.886	2.93898e-05	DS_vs_CTL	ENOX1	6.05157e-08	TRUE	IP_IN	13.8803	11.2588
1.19643e-09	-1.10533	0.39	0.644	3.18333e-05	DS_vs_CTL	NEGR1	6.50822e-08	TRUE	IP_IN	8.34057	3.87091
1.31264e-09	-0.599932	0.341	0.586	3.49255e-05	DS_vs_CTL	RPL11	7.09013e-08	TRUE	IP_IN	3.60656	2.37395
1.44001e-09	-0.675577	0.232	0.461	3.83144e-05	DS_vs_CTL	SMC2	7.7237e-08	TRUE	IP_IN	3.03907	1.89708
1.47477e-09	1.0949	0.445	0.269	3.92392e-05	DS_vs_CTL	GLI2	7.85519e-08	TRUE	IP_IN	1.64362	3.50624
1.54538e-09	1.93484	0.238	0.108	4.1118e-05	DS_vs_CTL	KCNIP4	8.17453e-08	TRUE	IP_IN	0.48207	1.8399
1.92896e-09	-0.739138	0.238	0.468	5.13239e-05	DS_vs_CTL	MARCKS	1.01337e-07	TRUE	IP_IN	2.58624	1.54376
2.71718e-09	0.442971	0.616	0.673	7.2296e-05	DS_vs_CTL	SRRM4	1.41736e-07	TRUE	IP_IN	5.60023	7.60788
2.73494e-09	1.81286	0.201	0.091	7.27686e-05	DS_vs_CTL	RGS7	1.41736e-07	TRUE	IP_IN	0.410193	1.43771
2.97262e-09	4.17795	0.079	0.014	7.90926e-05	DS_vs_CTL	C8orf34	1.5302e-07	TRUE	IP_IN	0.0300157	0.550787
3.10888e-09	0.717642	0.268	0.252	8.2718e-05	DS_vs_CTL	BTG1	1.58968e-07	TRUE	IP_IN	1.3184	2.16323
3.24179e-09	-0.63847	0.372	0.622	8.62543e-05	DS_vs_CTL	VPS13B	1.64666e-07	TRUE	IP_IN	4.79959	3.07761
3.2993e-09	-1.59563	0.085	0.291	8.77846e-05	DS_vs_CTL	LRGUK	1.66485e-07	TRUE	IP_IN	2.00013	0.655949
3.55875e-09	1.62289	0.262	0.131	9.46876e-05	DS_vs_CTL	MACROD2	1.78403e-07	TRUE	IP_IN	0.698612	2.14788
3.78261e-09	2.91303	0.091	0.034	0.000100644	DS_vs_CTL	CLMP	1.88394e-07	TRUE	IP_IN	0.0703204	0.529207
3.86059e-09	-0.648517	0.305	0.548	0.000102719	DS_vs_CTL	MYO1B	1.91037e-07	TRUE	IP_IN	3.81132	2.42576
3.95434e-09	2.47063	0.091	0.041	0.000105213	DS_vs_CTL	SLA	1.94422e-07	TRUE	IP_IN	0.0989002	0.546252
4.25011e-09	2.00833	0.195	0.075	0.000113083	DS_vs_CTL	NFIA-AS2	2.07633e-07	TRUE	IP_IN	0.449577	1.80564
4.3698e-09	-0.758974	0.323	0.571	0.000116267	DS_vs_CTL	RGS12	2.12129e-07	TRUE	IP_IN	4.07534	2.40253
4.86243e-09	-0.549304	0.299	0.522	0.000129375	DS_vs_CTL	RPLP1	2.34559e-07	TRUE	IP_IN	3.08864	2.10503
5.29437e-09	1.96461	0.183	0.066	0.000140867	DS_vs_CTL	CST3	2.53799e-07	TRUE	IP_IN	0.266915	1.03862
5.65414e-09	-0.0429891	0.256	0.387	0.00015044	DS_vs_CTL	SNRNP70	2.69362e-07	FALSE	IP_IN	1.69919	1.64394
5.86321e-09	1.67405	0.238	0.132	0.000156003	DS_vs_CTL	ARPP21	2.77598e-07	TRUE	IP_IN	0.476483	1.5168
6.00335e-09	0.573981	0.445	0.466	0.000159731	DS_vs_CTL	HES6	2.82489e-07	TRUE	IP_IN	2.53461	3.7681
6.80274e-09	-3.426	0.012	0.155	0.000181001	DS_vs_CTL	KCNIP2	3.18153e-07	TRUE	IP_IN	0.769074	0.0655271
8.18178e-09	-1.16817	0.152	0.375	0.000217693	DS_vs_CTL	RPL35A	3.80329e-07	TRUE	IP_IN	2.02605	0.895803
8.34597e-09	0.844772	0.47	0.365	0.000222061	DS_vs_CTL	ITSN1	3.85624e-07	TRUE	IP_IN	2.02529	3.63263
8.41147e-09	0.747075	0.476	0.422	0.000223804	DS_vs_CTL	NXN	3.86323e-07	TRUE	IP_IN	3.01745	5.05961
8.82709e-09	-0.12516	0.183	0.323	0.000234862	DS_vs_CTL	RPS6	4.02999e-07	FALSE	IP_IN	1.59658	1.4585
9.17046e-09	2.17112	0.11	0.042	0.000243998	DS_vs_CTL	MFAP2	4.16198e-07	TRUE	IP_IN	0.138953	0.623088
9.40911e-09	-0.588156	0.311	0.544	0.000250348	DS_vs_CTL	GAD1	4.24517e-07	TRUE	IP_IN	3.89843	2.58761
1.1129e-08	0.0905767	0.573	0.708	0.00029611	DS_vs_CTL	SRRM2	4.99179e-07	FALSE	IP_IN	5.27311	5.60949
1.13899e-08	-0.66351	0.817	0.932	0.000303052	DS_vs_CTL	PBX1	5.03361e-07	TRUE	IP_IN	21.4353	13.5274
1.13939e-08	-1.06051	0.183	0.415	0.000303158	DS_vs_CTL	PDZRN4	5.03361e-07	TRUE	IP_IN	3.13352	1.49667
1.14191e-08	-0.748476	0.396	0.643	0.000303829	DS_vs_CTL	NELL2	5.03361e-07	TRUE	IP_IN	6.08473	3.61617
1.18137e-08	-0.325163	0.323	0.508	0.000314328	DS_vs_CTL	CPSF6	5.17779e-07	TRUE	IP_IN	3.0588	2.43606
1.2161e-08	-1.06221	0.159	0.379	0.000323568	DS_vs_CTL	MKI67	5.29972e-07	TRUE	IP_IN	2.34101	1.11537
1.25435e-08	0.673864	0.171	0.171	0.000333744	DS_vs_CTL	FOXRED1	5.43551e-07	TRUE	IP_IN	0.736772	1.1705
1.28253e-08	0.826124	0.177	0.165	0.000341244	DS_vs_CTL	KIF3C	5.52642e-07	TRUE	IP_IN	0.748596	1.32243
1.32615e-08	-2.24923	0.055	0.236	0.000352849	DS_vs_CTL	CHST9	5.68245e-07	TRUE	IP_IN	1.78918	0.370389
1.36466e-08	-1.38889	0.098	0.3	0.000363095	DS_vs_CTL	RIC3	5.81496e-07	TRUE	IP_IN	2.16293	0.820119
1.46068e-08	0.728607	0.591	0.493	0.000388644	DS_vs_CTL	HUNK	6.18421e-07	TRUE	IP_IN	3.40126	5.63116
1.46744e-08	0.840557	0.335	0.28	0.000390442	DS_vs_CTL	AC079781.5	6.18421e-07	TRUE	IP_IN	1.39412	2.49175
1.52926e-08	1.94166	0.22	0.084	0.00040689	DS_vs_CTL	PCSK1N	6.40952e-07	TRUE	IP_IN	0.3418	1.3098
1.62056e-08	-0.973232	0.366	0.61	0.000431182	DS_vs_CTL	EPHA4	6.75527e-07	TRUE	IP_IN	6.26193	3.18388
1.68548e-08	-0.0602388	0.384	0.541	0.000448456	DS_vs_CTL	ARGLU1	6.98792e-07	FALSE	IP_IN	2.96992	2.84309
1.73142e-08	1.59923	0.165	0.091	0.000460679	DS_vs_CTL	ACVR1	7.13978e-07	TRUE	IP_IN	0.422167	1.27526
1.78319e-08	0.105377	0.201	0.277	0.000474452	DS_vs_CTL	SF1	7.30433e-07	FALSE	IP_IN	1.33009	1.42559
1.79037e-08	0.519326	0.256	0.271	0.000476364	DS_vs_CTL	JPT1	7.30433e-07	TRUE	IP_IN	1.21741	1.73988
1.83432e-08	-0.409443	0.512	0.739	0.000488059	DS_vs_CTL	SOX11	7.42975e-07	TRUE	IP_IN	6.32909	4.75973
1.84049e-08	0.545558	0.537	0.511	0.000489698	DS_vs_CTL	SON	7.42975e-07	TRUE	IP_IN	3.20608	4.67455
1.87321e-08	1.13706	0.091	0.077	0.000498406	DS_vs_CTL	BEX4	7.52228e-07	TRUE	IP_IN	0.250605	0.546716
1.92793e-08	-1.0284	0.213	0.441	0.000512966	DS_vs_CTL	RPS27A	7.7017e-07	TRUE	IP_IN	2.73785	1.33652
2.27018e-08	0.461827	0.39	0.42	0.000604026	DS_vs_CTL	SMARCA4	9.0219e-07	TRUE	IP_IN	2.55645	3.51589
2.37975e-08	1.19282	0.177	0.136	0.00063318	DS_vs_CTL	ELOVL6	9.40859e-07	TRUE	IP_IN	0.687743	1.5678
2.53254e-08	2.33216	0.073	0.038	0.000673834	DS_vs_CTL	TMEM132B	9.96133e-07	TRUE	IP_IN	0.101356	0.508071
2.62281e-08	0.96707	0.372	0.258	0.00069785	DS_vs_CTL	JAM2	1.02637e-06	TRUE	IP_IN	1.38919	2.71106
2.65989e-08	1.05745	0.299	0.21	0.000707717	DS_vs_CTL	VCAN	1.0356e-06	TRUE	IP_IN	1.02939	2.13788
2.74605e-08	1.87557	0.146	0.08	0.000730641	DS_vs_CTL	ASTN2	1.06375e-06	TRUE	IP_IN	0.294559	1.07753
2.78037e-08	-1.70086	0.104	0.305	0.000739772	DS_vs_CTL	CDH12	1.07163e-06	TRUE	IP_IN	4.20395	1.28728
2.80494e-08	-0.801374	0.073	0.221	0.000746311	DS_vs_CTL	LMO1	1.0757e-06	TRUE	IP_IN	1.49125	0.850019
2.8223e-08	0.523528	0.165	0.183	0.00075093	DS_vs_CTL	MTMR4	1.07697e-06	TRUE	IP_IN	0.823515	1.17876
3.14288e-08	-0.659233	0.36	0.597	0.000836225	DS_vs_CTL	TNRC6A	1.19336e-06	TRUE	IP_IN	4.19816	2.65272
3.49923e-08	3.41738	0.079	0.017	0.000931039	DS_vs_CTL	TMEM59L	1.32212e-06	TRUE	IP_IN	0.0322803	0.346807
3.63225e-08	-0.507201	0.268	0.466	0.000966434	DS_vs_CTL	U2SURP	1.36566e-06	TRUE	IP_IN	2.8318	1.98685
3.6939e-08	1.87633	0.104	0.06	0.000982835	DS_vs_CTL	NRP1	1.38206e-06	TRUE	IP_IN	0.188304	0.688002
3.75827e-08	2.35081	0.116	0.052	0.000999963	DS_vs_CTL	LINGO2	1.39932e-06	TRUE	IP_IN	0.105107	0.533892
3.78902e-08	0.757595	0.323	0.255	0.00100814	DS_vs_CTL	DGCR8	1.40301e-06	TRUE	IP_IN	1.22302	2.06289
3.81164e-08	0.61451	0.829	0.763	0.00101416	DS_vs_CTL	MEIS2	1.40301e-06	TRUE	IP_IN	9.62887	14.7372
3.82307e-08	-0.191868	0.159	0.276	0.00101721	DS_vs_CTL	SRSF2	1.40301e-06	FALSE	IP_IN	1.17826	1.0261
3.93365e-08	-0.593334	0.28	0.495	0.00104663	DS_vs_CTL	TRIM13	1.43672e-06	TRUE	IP_IN	3.37265	2.22983
4.02279e-08	1.51395	0.226	0.118	0.00107034	DS_vs_CTL	RNF213	1.46231e-06	TRUE	IP_IN	0.572107	1.62993
4.12191e-08	-0.0209775	0.159	0.242	0.00109672	DS_vs_CTL	RBM4	1.49127e-06	FALSE	IP_IN	1.09921	1.07798
4.17861e-08	-0.906471	0.402	0.637	0.0011118	DS_vs_CTL	RDX	1.50469e-06	TRUE	IP_IN	5.6799	3.02446
4.35946e-08	0.0500096	0.232	0.321	0.00115992	DS_vs_CTL	LUC7L	1.56248e-06	FALSE	IP_IN	1.5586	1.60825
4.49749e-08	-1.17474	0.116	0.307	0.00119665	DS_vs_CTL	RPS28	1.60445e-06	TRUE	IP_IN	1.55437	0.682766
4.55673e-08	0.468861	0.116	0.137	0.00121241	DS_vs_CTL	DLST	1.61806e-06	TRUE	IP_IN	0.61846	0.8509
5.22969e-08	-0.550096	0.335	0.556	0.00139146	DS_vs_CTL	HMGN2	1.84846e-06	TRUE	IP_IN	3.74331	2.551
5.39206e-08	0.685852	0.329	0.343	0.00143467	DS_vs_CTL	H3F3B	1.89712e-06	TRUE	IP_IN	1.51766	2.43649
5.57189e-08	0.128867	0.299	0.403	0.00148251	DS_vs_CTL	RFTN2	1.95143e-06	FALSE	IP_IN	2.48392	2.71073
5.63302e-08	-0.773721	0.201	0.405	0.00149878	DS_vs_CTL	RPS3	1.96387e-06	TRUE	IP_IN	2.23889	1.30388
5.67285e-08	2.55043	0.122	0.047	0.00150938	DS_vs_CTL	LUZP2	1.96881e-06	TRUE	IP_IN	0.116097	0.678406
5.7387e-08	1.095	0.287	0.202	0.0015269	DS_vs_CTL	RNF180	1.9827e-06	TRUE	IP_IN	1.02112	2.17675
6.14379e-08	2.5228	0.11	0.04	0.00163468	DS_vs_CTL	GALNTL6	2.11313e-06	TRUE	IP_IN	0.0906534	0.519198
6.85116e-08	2.37602	0.11	0.044	0.00182289	DS_vs_CTL	PLPPR1	2.34591e-06	TRUE	IP_IN	0.129219	0.668577
7.00233e-08	1.38171	0.201	0.115	0.00186311	DS_vs_CTL	GNG2	2.38702e-06	TRUE	IP_IN	0.470632	1.22222
7.17973e-08	0.746004	0.238	0.233	0.00191031	DS_vs_CTL	DYNLL1	2.43666e-06	TRUE	IP_IN	1.06957	1.78897
7.24251e-08	-0.544679	0.329	0.552	0.00192701	DS_vs_CTL	RFC3	2.44714e-06	TRUE	IP_IN	4.42552	3.02831
7.38443e-08	-3.08514	0.024	0.161	0.00196478	DS_vs_CTL	LRRC37A2	2.45593e-06	TRUE	IP_IN	0.761671	0.0837436
7.39231e-08	0.553168	0.848	0.783	0.00196687	DS_vs_CTL	TUBA1A	2.45593e-06	TRUE	IP_IN	6.75606	9.9082
7.39647e-08	2.17229	0.098	0.041	0.00196798	DS_vs_CTL	ADCY1	2.45593e-06	TRUE	IP_IN	0.140449	0.630343
7.39661e-08	-0.746517	0.232	0.44	0.00196802	DS_vs_CTL	RPS23	2.45593e-06	TRUE	IP_IN	2.44156	1.44962
7.76739e-08	1.28373	0.091	0.116	0.00206667	DS_vs_CTL	HES4	2.55905e-06	TRUE	IP_IN	0.248986	0.60193
7.77391e-08	0.226849	0.122	0.172	0.0020684	DS_vs_CTL	PPIA	2.55905e-06	FALSE	IP_IN	0.768878	0.894581
7.91392e-08	-0.0243604	0.323	0.448	0.00210566	DS_vs_CTL	PCMTD1	2.59401e-06	FALSE	IP_IN	2.55308	2.50498
7.97053e-08	0.233781	0.213	0.257	0.00212072	DS_vs_CTL	ZNF100	2.60144e-06	FALSE	IP_IN	1.29109	1.51299
8.0595e-08	0.604466	0.323	0.294	0.00214439	DS_vs_CTL	MIRLET7BHG	2.61934e-06	TRUE	IP_IN	1.50191	2.27858
8.63669e-08	1.87252	0.152	0.098	0.00229796	DS_vs_CTL	PRKG1	2.79508e-06	TRUE	IP_IN	0.456887	1.66964
8.7214e-08	0.551554	0.378	0.365	0.0023205	DS_vs_CTL	SLC25A12	2.80615e-06	TRUE	IP_IN	2.17302	3.17992
8.74407e-08	0.678175	0.085	0.118	0.00232654	DS_vs_CTL	B4GALNT4	2.80615e-06	TRUE	IP_IN	0.292767	0.463565
8.89839e-08	1.33259	0.256	0.155	0.00236759	DS_vs_CTL	CSMD2	2.84378e-06	TRUE	IP_IN	0.800655	2.01227
9.44122e-08	0.624156	0.256	0.242	0.00251203	DS_vs_CTL	RAD23B	2.99843e-06	TRUE	IP_IN	1.22912	1.88951
9.46049e-08	2.92027	0.085	0.023	0.00251715	DS_vs_CTL	ALCAM	2.99843e-06	TRUE	IP_IN	0.0713127	0.539413
9.58522e-08	-0.815314	0.177	0.375	0.00255034	DS_vs_CTL	RPL3	3.02546e-06	TRUE	IP_IN	1.91167	1.0807
9.69406e-08	0.964922	0.201	0.162	0.0025793	DS_vs_CTL	FAM214A	3.04727e-06	TRUE	IP_IN	0.800663	1.55823
1.02497e-07	1.74024	0.134	0.09	0.00272715	DS_vs_CTL	LRRTM4	3.20879e-06	TRUE	IP_IN	0.25599	0.851648
1.038e-07	-0.520272	0.378	0.596	0.00276179	DS_vs_CTL	ANKRD36	3.23635e-06	TRUE	IP_IN	4.03265	2.80615
1.04897e-07	0.542298	0.079	0.096	0.002791	DS_vs_CTL	UBAP2L	3.25733e-06	TRUE	IP_IN	0.432795	0.625271
1.13986e-07	0.301324	0.189	0.24	0.00303281	DS_vs_CTL	ARHGAP33	3.52528e-06	TRUE	IP_IN	1.08363	1.33016
1.15776e-07	-0.47812	0.177	0.343	0.00308044	DS_vs_CTL	RPLP0	3.56626e-06	TRUE	IP_IN	1.62582	1.16163
1.16242e-07	-0.462965	0.073	0.179	0.00309285	DS_vs_CTL	IGDCC3	3.5663e-06	TRUE	IP_IN	0.832379	0.598333
1.20094e-07	1.13559	0.091	0.087	0.00319534	DS_vs_CTL	CNR1	3.6698e-06	TRUE	IP_IN	0.242665	0.528709
1.24163e-07	-0.875983	0.195	0.405	0.00330362	DS_vs_CTL	ARHGAP11B	3.76739e-06	TRUE	IP_IN	2.85597	1.55048
1.2427e-07	-0.565326	0.5	0.721	0.00330645	DS_vs_CTL	OLA1	3.76739e-06	TRUE	IP_IN	6.54359	4.41659
1.28831e-07	0.928103	0.14	0.125	0.00342781	DS_vs_CTL	CDK5RAP3	3.89029e-06	TRUE	IP_IN	0.448194	0.848142
1.29756e-07	1.25847	0.159	0.119	0.00345241	DS_vs_CTL	ADGRL2	3.90285e-06	TRUE	IP_IN	0.443192	1.056
1.30977e-07	-1.17636	0.098	0.27	0.0034849	DS_vs_CTL	FREM2	3.92419e-06	TRUE	IP_IN	1.659	0.72829
1.35499e-07	-0.20485	0.433	0.622	0.00360522	DS_vs_CTL	GPATCH8	4.04388e-06	FALSE	IP_IN	4.6306	4.01219
1.37347e-07	-0.499079	0.189	0.363	0.0036544	DS_vs_CTL	PFN2	4.08315e-06	TRUE	IP_IN	1.82568	1.28621
1.38591e-07	-1.27663	0.122	0.314	0.00368749	DS_vs_CTL	H2AFZ	4.10422e-06	TRUE	IP_IN	1.68277	0.688791
1.4655e-07	1.787	0.116	0.062	0.00389925	DS_vs_CTL	SHANK2	4.32322e-06	TRUE	IP_IN	0.225166	0.773534
1.4772e-07	1.427	0.14	0.083	0.00393039	DS_vs_CTL	SOD1	4.34105e-06	TRUE	IP_IN	0.343871	0.920546
1.55475e-07	-2.1443	0.049	0.209	0.00413673	DS_vs_CTL	SAMD5	4.55151e-06	TRUE	IP_IN	1.86097	0.415032
1.58051e-07	0.562666	0.756	0.682	0.00420528	DS_vs_CTL	BICD1	4.60196e-06	TRUE	IP_IN	5.90522	8.717
1.58399e-07	-0.967032	0.085	0.241	0.00421451	DS_vs_CTL	RPS11	4.60196e-06	TRUE	IP_IN	1.11347	0.563891
1.63488e-07	-0.104666	0.61	0.774	0.00434992	DS_vs_CTL	LUC7L3	4.73189e-06	FALSE	IP_IN	6.26898	5.82488
1.67241e-07	-0.837157	0.329	0.559	0.00444977	DS_vs_CTL	SMC4	4.82231e-06	TRUE	IP_IN	4.13356	2.30806
1.75136e-07	-0.0584435	0.189	0.286	0.00465984	DS_vs_CTL	CNOT6	5.03106e-06	FALSE	IP_IN	1.41998	1.35823
1.80944e-07	-0.0265814	0.226	0.33	0.00481438	DS_vs_CTL	NCOA6	5.17852e-06	FALSE	IP_IN	1.79625	1.75809
1.85136e-07	-0.522028	0.549	0.761	0.00492592	DS_vs_CTL	HMGB1	5.26295e-06	TRUE	IP_IN	6.54027	4.54902
1.85267e-07	-1.39553	0.104	0.291	0.0049294	DS_vs_CTL	LINC00511	5.26295e-06	TRUE	IP_IN	1.91419	0.72178
1.8606e-07	-0.52069	0.543	0.755	0.0049505	DS_vs_CTL	HNRNPA2B1	5.26598e-06	TRUE	IP_IN	5.97863	4.16176
1.99346e-07	-0.535595	0.39	0.604	0.00530401	DS_vs_CTL	HNRNPDL	5.62127e-06	TRUE	IP_IN	3.4291	2.36007
2.0144e-07	-0.62943	0.183	0.362	0.0053597	DS_vs_CTL	RPS15A	5.65949e-06	TRUE	IP_IN	1.93106	1.24269
2.04128e-07	2.46863	0.067	0.037	0.00543125	DS_vs_CTL	CDH18	5.71411e-06	TRUE	IP_IN	0.0601465	0.33098
2.05747e-07	-0.545815	0.378	0.596	0.00547431	DS_vs_CTL	LINC00342	5.73847e-06	TRUE	IP_IN	4.3607	2.98151
2.08671e-07	-1.45007	0.061	0.212	0.00555212	DS_vs_CTL	SLC25A6	5.79894e-06	TRUE	IP_IN	0.966523	0.347927
2.11278e-07	0.783039	0.372	0.312	0.00562148	DS_vs_CTL	FTH1	5.85019e-06	TRUE	IP_IN	1.39268	2.39165
2.16934e-07	0.358719	0.293	0.344	0.00577197	DS_vs_CTL	CIRBP	5.9852e-06	TRUE	IP_IN	1.35772	1.73586
2.23222e-07	-0.521532	0.372	0.584	0.00593925	DS_vs_CTL	ILF3	6.13659e-06	TRUE	IP_IN	3.63845	2.52908
2.26745e-07	-0.527451	0.238	0.414	0.006033	DS_vs_CTL	RBM26	6.21119e-06	TRUE	IP_IN	2.29968	1.58989
2.38948e-07	0.782044	0.232	0.198	0.00635769	DS_vs_CTL	SLC30A9	6.52218e-06	TRUE	IP_IN	0.951396	1.63118
2.40924e-07	0.107946	0.476	0.571	0.00641027	DS_vs_CTL	KMT2E	6.55162e-06	FALSE	IP_IN	3.74953	4.03556
2.41735e-07	0.793405	0.177	0.182	0.00643184	DS_vs_CTL	PTN	6.55162e-06	TRUE	IP_IN	0.696803	1.20287
2.44711e-07	0.34981	0.305	0.356	0.00651103	DS_vs_CTL	MARCKSL1	6.60892e-06	TRUE	IP_IN	1.80027	2.28912
2.57049e-07	-0.259971	0.073	0.159	0.00683931	DS_vs_CTL	DDX39A	6.90453e-06	TRUE	IP_IN	0.659955	0.545661
2.57558e-07	-1.14126	0.14	0.333	0.00685286	DS_vs_CTL	RPS27	6.90453e-06	TRUE	IP_IN	1.75243	0.788733
2.58357e-07	-0.373508	0.122	0.243	0.00687411	DS_vs_CTL	XPO7	6.90453e-06	TRUE	IP_IN	1.25557	0.963661
2.67214e-07	-1.02973	0.146	0.339	0.00710975	DS_vs_CTL	MAP3K20	7.11642e-06	TRUE	IP_IN	2.05474	1.00068
2.7482e-07	1.09231	0.183	0.125	0.00731215	DS_vs_CTL	ACO2	7.27281e-06	TRUE	IP_IN	0.577625	1.22709
2.74983e-07	0.0307096	0.25	0.345	0.00731646	DS_vs_CTL	ZMYND11	7.27281e-06	FALSE	IP_IN	1.89661	1.93208
2.8609e-07	-0.412473	0.476	0.685	0.007612	DS_vs_CTL	BCL11B	7.54059e-06	TRUE	IP_IN	6.30318	4.73026
2.87144e-07	0.750907	0.177	0.17	0.00764003	DS_vs_CTL	SCN3A	7.54244e-06	TRUE	IP_IN	0.760189	1.27445
2.90835e-07	-0.195817	0.305	0.462	0.00773824	DS_vs_CTL	STAG2	7.61332e-06	FALSE	IP_IN	2.8853	2.51365
3.0669e-07	0.111944	0.555	0.678	0.00816011	DS_vs_CTL	ENAH	8.00107e-06	FALSE	IP_IN	5.45021	5.88466
3.08511e-07	2.04393	0.104	0.041	0.00820856	DS_vs_CTL	EML1	8.02129e-06	TRUE	IP_IN	0.142842	0.586031
3.12531e-07	0.775948	0.128	0.119	0.00831552	DS_vs_CTL	AC211433.1	8.09836e-06	TRUE	IP_IN	0.550558	0.937917
3.15803e-07	-0.862619	0.091	0.233	0.00840258	DS_vs_CTL	HIST1H1E	8.1556e-06	TRUE	IP_IN	1.10451	0.601742
3.40161e-07	0.423833	0.201	0.225	0.00905067	DS_vs_CTL	XPO4	8.75516e-06	TRUE	IP_IN	1.16991	1.56432
3.43877e-07	2.11898	0.159	0.047	0.00914953	DS_vs_CTL	SNHG31	8.82118e-06	TRUE	IP_IN	0.314186	1.36194
3.53829e-07	-0.694278	0.25	0.453	0.00941433	DS_vs_CTL	RSRC1	9.04623e-06	TRUE	IP_IN	2.90713	1.79102
3.62809e-07	2.02244	0.165	0.068	0.00965327	DS_vs_CTL	PCDH7	9.21706e-06	TRUE	IP_IN	0.363892	1.47534
3.63498e-07	0.792654	0.165	0.146	0.0096716	DS_vs_CTL	USP11	9.21706e-06	TRUE	IP_IN	0.617563	1.06498
3.64116e-07	0.759465	0.25	0.209	0.00968803	DS_vs_CTL	MORC3	9.21706e-06	TRUE	IP_IN	1.03854	1.75328
3.86604e-07	-0.735874	0.378	0.601	0.0102864	DS_vs_CTL	PRKD1	9.75411e-06	TRUE	IP_IN	5.25317	3.14864
3.91124e-07	-0.690446	0.134	0.294	0.0104066	DS_vs_CTL	RPL24	9.8358e-06	TRUE	IP_IN	1.37346	0.845447
3.94904e-07	3.01276	0.079	0.023	0.0105072	DS_vs_CTL	NTRK3	9.87833e-06	TRUE	IP_IN	0.0487615	0.39352
3.95391e-07	2.15681	0.079	0.034	0.0105202	DS_vs_CTL	EGLN2	9.87833e-06	TRUE	IP_IN	0.102696	0.4552
4.18701e-07	0.375724	0.293	0.321	0.0111404	DS_vs_CTL	CTNND1	1.04267e-05	TRUE	IP_IN	1.6682	2.15935
4.28535e-07	-0.31599	0.274	0.432	0.011402	DS_vs_CTL	EMSY	1.06371e-05	TRUE	IP_IN	2.70996	2.17141
4.39912e-07	0.482991	0.134	0.158	0.0117047	DS_vs_CTL	MCM7	1.08373e-05	TRUE	IP_IN	0.664283	0.923379
4.40599e-07	-0.450304	0.317	0.516	0.011723	DS_vs_CTL	AKAP9	1.08373e-05	TRUE	IP_IN	3.45625	2.52404
4.40841e-07	3.54311	0.079	0.009	0.0117295	DS_vs_CTL	HS6ST2	1.08373e-05	TRUE	IP_IN	0.042156	0.49406
4.44771e-07	-0.731943	0.341	0.562	0.011834	DS_vs_CTL	TUBA1B	1.0899e-05	TRUE	IP_IN	3.95097	2.37321
4.48151e-07	-2.21955	0.018	0.133	0.011924	DS_vs_CTL	AC091057.6	1.09469e-05	TRUE	IP_IN	0.691403	0.142513
4.59693e-07	-0.552	0.256	0.441	0.0122311	DS_vs_CTL	HERC2	1.11932e-05	TRUE	IP_IN	2.62276	1.78333
4.69723e-07	0.498126	0.872	0.758	0.0124979	DS_vs_CTL	KCNH7	1.14012e-05	TRUE	IP_IN	10.3002	14.5427
4.79444e-07	1.06997	0.207	0.148	0.0127566	DS_vs_CTL	CLVS2	1.16004e-05	TRUE	IP_IN	0.71401	1.49447
4.82828e-07	0.971672	0.183	0.143	0.0128466	DS_vs_CTL	SYT11	1.16215e-05	TRUE	IP_IN	0.609341	1.19036
4.83347e-07	1.63748	0.128	0.075	0.0128604	DS_vs_CTL	FAT3	1.16215e-05	TRUE	IP_IN	0.235197	0.727986
4.9018e-07	-0.374809	0.518	0.72	0.0130422	DS_vs_CTL	AFDN	1.1749e-05	TRUE	IP_IN	5.70569	4.39475
4.93088e-07	0.558028	0.506	0.509	0.0131196	DS_vs_CTL	SNHG14	1.17819e-05	TRUE	IP_IN	2.97297	4.37198
5.13623e-07	-0.556452	0.11	0.236	0.013666	DS_vs_CTL	SNAPC3	1.22344e-05	TRUE	IP_IN	1.15418	0.779223
5.30564e-07	2.17867	0.122	0.043	0.0141167	DS_vs_CTL	LTBP1	1.25988e-05	TRUE	IP_IN	0.19856	0.896257
5.33348e-07	1.59342	0.207	0.089	0.0141908	DS_vs_CTL	NFIC	1.26259e-05	TRUE	IP_IN	0.431638	1.2987
5.5745e-07	0.91158	0.451	0.349	0.0148321	DS_vs_CTL	NPAS3	1.31516e-05	TRUE	IP_IN	2.78398	5.23227
5.58985e-07	1.14772	0.195	0.143	0.0148729	DS_vs_CTL	SORBS2	1.31516e-05	TRUE	IP_IN	0.523658	1.1558
5.65083e-07	-1.14238	0.256	0.468	0.0150352	DS_vs_CTL	TAFA2	1.32544e-05	TRUE	IP_IN	4.97284	2.247
5.76611e-07	-0.114665	0.25	0.374	0.0153419	DS_vs_CTL	ATAD2B	1.34836e-05	FALSE	IP_IN	2.28696	2.10682
5.82588e-07	1.10363	0.335	0.2	0.0155009	DS_vs_CTL	TUBB2A	1.35819e-05	TRUE	IP_IN	0.93349	2.00153
5.96426e-07	-0.377327	0.982	0.991	0.0158691	DS_vs_CTL	DLEU2	1.38624e-05	TRUE	IP_IN	41.8625	32.2228
6.01346e-07	-0.591417	0.348	0.56	0.016	DS_vs_CTL	AC011447.3	1.39345e-05	TRUE	IP_IN	4.19519	2.77871
6.14211e-07	1.97076	0.079	0.04	0.0163423	DS_vs_CTL	METRN	1.41897e-05	TRUE	IP_IN	0.137209	0.534669
6.17823e-07	0.512955	0.098	0.11	0.0164384	DS_vs_CTL	LRRC37B	1.42303e-05	TRUE	IP_IN	0.456997	0.647094
6.25488e-07	0.716652	0.171	0.17	0.0166424	DS_vs_CTL	MLLT11	1.43637e-05	TRUE	IP_IN	0.692329	1.13288
6.27833e-07	-0.269405	0.268	0.42	0.0167048	DS_vs_CTL	ZNF730	1.43746e-05	TRUE	IP_IN	2.63523	2.18088
6.36805e-07	0.00597153	0.183	0.267	0.0169435	DS_vs_CTL	ACTN4	1.4532e-05	FALSE	IP_IN	1.23357	1.23335
6.38498e-07	1.16902	0.177	0.113	0.0169885	DS_vs_CTL	MYO10	1.4532e-05	TRUE	IP_IN	0.487969	1.09283
6.40801e-07	1.05204	0.085	0.08	0.0170498	DS_vs_CTL	DYNC1I1	1.45413e-05	TRUE	IP_IN	0.297872	0.613083
6.56145e-07	0.0476016	0.116	0.179	0.017458	DS_vs_CTL	EID1	1.48005e-05	FALSE	IP_IN	0.768582	0.789043
6.57737e-07	0.94199	0.28	0.205	0.0175004	DS_vs_CTL	PPFIA1	1.48005e-05	TRUE	IP_IN	1.04449	2.002
6.58016e-07	1.13125	0.128	0.116	0.0175078	DS_vs_CTL	SAT2	1.48005e-05	TRUE	IP_IN	0.28705	0.624324
6.61122e-07	-1.68887	0.037	0.167	0.0175905	DS_vs_CTL	LHX6	1.48269e-05	TRUE	IP_IN	0.857761	0.260187
6.75988e-07	1.33176	0.195	0.122	0.017986	DS_vs_CTL	HECW1	1.51161e-05	TRUE	IP_IN	0.582092	1.46097
6.90387e-07	-1.11407	0.128	0.308	0.0183691	DS_vs_CTL	PPA2	1.53932e-05	TRUE	IP_IN	1.80843	0.829725
6.94159e-07	2.07128	0.098	0.058	0.0184695	DS_vs_CTL	LINC01965	1.54325e-05	TRUE	IP_IN	0.260009	1.08977
6.96542e-07	-0.494905	0.713	0.875	0.0185329	DS_vs_CTL	QKI	1.54407e-05	TRUE	IP_IN	12.6317	8.95798
7.11915e-07	0.962483	0.36	0.272	0.0189419	DS_vs_CTL	CAMK4	1.5736e-05	TRUE	IP_IN	1.62059	3.15334
7.16434e-07	0.209717	0.238	0.306	0.0190622	DS_vs_CTL	AGO4	1.57904e-05	FALSE	IP_IN	1.68088	1.93864
7.34531e-07	-0.178899	0.957	0.997	0.0195437	DS_vs_CTL	NRXN3	1.61428e-05	FALSE	IP_IN	112.201	99.1103
7.39369e-07	2.35134	0.067	0.029	0.0196724	DS_vs_CTL	ZIC1	1.61685e-05	TRUE	IP_IN	0.0964931	0.490135
7.39913e-07	0.511733	0.299	0.294	0.0196869	DS_vs_CTL	EFS	1.61685e-05	TRUE	IP_IN	1.4981	2.13091
7.42146e-07	0.459423	0.226	0.252	0.0197463	DS_vs_CTL	ATP9A	1.61712e-05	TRUE	IP_IN	1.22782	1.68318
7.55194e-07	0.845151	0.14	0.122	0.0200935	DS_vs_CTL	MCM3AP	1.63762e-05	TRUE	IP_IN	0.541107	0.967324
7.55824e-07	2.17896	0.085	0.056	0.0201102	DS_vs_CTL	GRAMD1B	1.63762e-05	TRUE	IP_IN	0.163515	0.737742
7.80256e-07	2.40926	0.098	0.036	0.0207603	DS_vs_CTL	MPPED1	1.68579e-05	TRUE	IP_IN	0.0905957	0.479138
8.16209e-07	0.528983	0.104	0.12	0.0217169	DS_vs_CTL	PTTG1IP	1.75405e-05	TRUE	IP_IN	0.4694	0.672288
8.1642e-07	0.399573	0.561	0.613	0.0217225	DS_vs_CTL	KALRN	1.75405e-05	TRUE	IP_IN	5.26947	6.94594
8.38611e-07	-1.06394	0.104	0.264	0.0223129	DS_vs_CTL	NCL	1.79669e-05	TRUE	IP_IN	1.36633	0.647809
8.47987e-07	0.237212	0.329	0.379	0.0225624	DS_vs_CTL	CARHSP1	1.81172e-05	FALSE	IP_IN	2.04913	2.41013
8.7154e-07	1.01539	0.268	0.186	0.0231891	DS_vs_CTL	ASRGL1	1.85335e-05	TRUE	IP_IN	0.950148	1.9161
8.72816e-07	-0.895115	0.22	0.423	0.023223	DS_vs_CTL	ASPM	1.85335e-05	TRUE	IP_IN	3.0489	1.63371
8.74724e-07	1.28368	0.14	0.098	0.0232738	DS_vs_CTL	DOK6	1.85335e-05	TRUE	IP_IN	0.338693	0.820308
8.94003e-07	-0.282076	0.073	0.152	0.0237867	DS_vs_CTL	ACTL6A	1.88898e-05	TRUE	IP_IN	0.723073	0.58918
9.14189e-07	0.641249	0.213	0.23	0.0243238	DS_vs_CTL	FRY	1.92633e-05	TRUE	IP_IN	1.3789	2.14572
9.24202e-07	0.542348	0.165	0.185	0.0245902	DS_vs_CTL	RAC1	1.94209e-05	TRUE	IP_IN	0.807136	1.17046
9.40832e-07	0.853684	0.098	0.093	0.0250327	DS_vs_CTL	LMF2	1.97163e-05	TRUE	IP_IN	0.347833	0.623832
9.46168e-07	0.0587012	0.244	0.328	0.0251747	DS_vs_CTL	CD46	1.97741e-05	FALSE	IP_IN	1.60511	1.66645
9.57581e-07	-0.128798	0.098	0.174	0.0254784	DS_vs_CTL	ZNF253	1.99583e-05	FALSE	IP_IN	0.80491	0.730754
9.85204e-07	0.621164	0.128	0.145	0.0262133	DS_vs_CTL	WDR6	2.04783e-05	TRUE	IP_IN	0.476834	0.728483
9.98906e-07	-0.612904	0.445	0.658	0.0265779	DS_vs_CTL	MARK1	2.07071e-05	TRUE	IP_IN	5.19267	3.38977
1.02444e-06	-1.9606	0.067	0.224	0.0272573	DS_vs_CTL	ADAMTSL1	2.11792e-05	TRUE	IP_IN	1.36819	0.345611
1.03658e-06	0.156627	0.171	0.217	0.0275803	DS_vs_CTL	VPS29	2.13725e-05	FALSE	IP_IN	1.01607	1.12733
1.04017e-06	-0.695095	0.183	0.362	0.0276759	DS_vs_CTL	RAB3IP	2.13891e-05	TRUE	IP_IN	2.29543	1.41218
1.11022e-06	-0.439952	0.14	0.27	0.0295397	DS_vs_CTL	TOPBP1	2.27685e-05	TRUE	IP_IN	1.37883	1.01087
1.11953e-06	-0.81785	0.128	0.282	0.0297874	DS_vs_CTL	RPS25	2.28404e-05	TRUE	IP_IN	1.40104	0.789117
1.11968e-06	0.958034	0.122	0.116	0.0297914	DS_vs_CTL	LENG8	2.28404e-05	TRUE	IP_IN	0.391907	0.756702
1.134e-06	0.171122	0.152	0.206	0.0301722	DS_vs_CTL	TTC19	2.3071e-05	FALSE	IP_IN	0.993759	1.11365
1.16184e-06	-0.759367	0.098	0.23	0.0309131	DS_vs_CTL	NMT2	2.35749e-05	TRUE	IP_IN	1.19474	0.700148
1.20269e-06	0.146462	0.28	0.356	0.032	DS_vs_CTL	PRKDC	2.43395e-05	FALSE	IP_IN	2.08429	2.30174
1.22438e-06	-1.72534	0.049	0.188	0.0325771	DS_vs_CTL	BX890604.2	2.4658e-05	TRUE	IP_IN	0.951782	0.281975
1.22491e-06	0.0119388	0.25	0.345	0.0325911	DS_vs_CTL	ARHGEF12	2.4658e-05	FALSE	IP_IN	1.89546	1.90587
1.23041e-06	1.03588	0.122	0.1	0.0327374	DS_vs_CTL	MCM3AP-AS1	2.4658e-05	TRUE	IP_IN	0.449215	0.916493
1.23129e-06	2.18682	0.085	0.033	0.032761	DS_vs_CTL	OBSL1	2.4658e-05	TRUE	IP_IN	0.0954457	0.431886
1.25383e-06	-0.88567	0.159	0.337	0.0333607	DS_vs_CTL	ZNF714	2.5044e-05	TRUE	IP_IN	1.8057	0.971617
1.2603e-06	-0.266058	0.244	0.381	0.0335327	DS_vs_CTL	HDAC2	2.51078e-05	TRUE	IP_IN	2.05172	1.70071
1.28477e-06	1.93366	0.055	0.04	0.0341838	DS_vs_CTL	GOLGA8B	2.55289e-05	TRUE	IP_IN	0.0919988	0.348227
1.28961e-06	1.17416	0.195	0.164	0.0343126	DS_vs_CTL	UCHL1	2.55589e-05	TRUE	IP_IN	0.568722	1.27899
1.31341e-06	-0.292825	0.366	0.543	0.0349458	DS_vs_CTL	SLAIN1	2.59446e-05	TRUE	IP_IN	4.2778	3.48649
1.31583e-06	0.833106	0.305	0.249	0.0350103	DS_vs_CTL	CALM1	2.59446e-05	TRUE	IP_IN	1.18202	2.10104
1.33486e-06	3.33012	0.073	0.014	0.0355167	DS_vs_CTL	SIGIRR	2.61895e-05	TRUE	IP_IN	0.0325353	0.328659
1.33508e-06	-1.87549	0.024	0.134	0.0355225	DS_vs_CTL	TBC1D15	2.61895e-05	TRUE	IP_IN	0.611863	0.16086
1.35303e-06	0.949339	0.287	0.196	0.0360002	DS_vs_CTL	PIP5K1A	2.64739e-05	TRUE	IP_IN	0.969084	1.86664
1.38257e-06	0.590982	0.305	0.294	0.036786	DS_vs_CTL	CLIP2	2.6983e-05	TRUE	IP_IN	1.57529	2.36785
1.38868e-06	-0.32924	0.372	0.549	0.0369486	DS_vs_CTL	HNRNPD	2.70334e-05	TRUE	IP_IN	3.31261	2.63119
1.42929e-06	-0.0926903	0.28	0.4	0.0380291	DS_vs_CTL	NUCKS1	2.77281e-05	FALSE	IP_IN	2.27586	2.12884
1.4316e-06	0.597813	0.421	0.378	0.0380905	DS_vs_CTL	DPYSL5	2.77281e-05	TRUE	IP_IN	2.15715	3.25972
1.45217e-06	0.665153	0.634	0.463	0.038638	DS_vs_CTL	NRG3	2.80559e-05	TRUE	IP_IN	5.324	8.43755
1.46302e-06	-1.21593	0.122	0.299	0.0389265	DS_vs_CTL	LAMTOR5-AS1	2.81944e-05	TRUE	IP_IN	1.58521	0.676655
1.47228e-06	-0.274846	0.14	0.239	0.0391729	DS_vs_CTL	PHF20L1	2.83017e-05	TRUE	IP_IN	1.18503	0.973996
1.50089e-06	-0.562307	0.22	0.391	0.0399342	DS_vs_CTL	TRA2B	2.87796e-05	TRUE	IP_IN	2.11853	1.42912
1.51364e-06	0.848857	0.323	0.265	0.0402735	DS_vs_CTL	RPS6KA2	2.89517e-05	TRUE	IP_IN	1.49083	2.68035
1.51798e-06	-2.10476	0.043	0.182	0.040389	DS_vs_CTL	TRIM59	2.89625e-05	TRUE	IP_IN	0.970604	0.219733
1.52302e-06	1.71181	0.098	0.055	0.040523	DS_vs_CTL	SHROOM3	2.89865e-05	TRUE	IP_IN	0.253733	0.82752
1.53962e-06	1.09541	0.14	0.121	0.0409646	DS_vs_CTL	KIAA0895L	2.92298e-05	TRUE	IP_IN	0.386606	0.821583
1.57703e-06	0.531073	0.579	0.628	0.0419601	DS_vs_CTL	NNAT	2.98663e-05	TRUE	IP_IN	4.91536	7.09769
1.61228e-06	-0.164643	0.146	0.263	0.0428979	DS_vs_CTL	RPL36	3.0315e-05	FALSE	IP_IN	1.14621	1.01716
1.61575e-06	1.05277	0.122	0.095	0.0429902	DS_vs_CTL	TAZ	3.0315e-05	TRUE	IP_IN	0.398574	0.822308
1.6184e-06	-0.77173	0.25	0.442	0.0430606	DS_vs_CTL	RPL6	3.0315e-05	TRUE	IP_IN	2.64639	1.54437
1.61972e-06	0.251532	0.183	0.23	0.0430959	DS_vs_CTL	TRPC4AP	3.0315e-05	TRUE	IP_IN	1.17663	1.39554
1.62049e-06	-0.224996	0.171	0.279	0.0431163	DS_vs_CTL	ATM	3.0315e-05	FALSE	IP_IN	1.42349	1.21248
1.63243e-06	0.0725175	0.104	0.16	0.0434342	DS_vs_CTL	BRD3	3.04642e-05	FALSE	IP_IN	0.750477	0.783856
1.63722e-06	-0.252406	0.25	0.381	0.0435614	DS_vs_CTL	NCAPD3	3.04792e-05	TRUE	IP_IN	2.2485	1.88214
1.68887e-06	0.449068	0.646	0.644	0.0449358	DS_vs_CTL	TTC3	3.12878e-05	TRUE	IP_IN	4.84284	6.60616
1.68902e-06	0.514517	0.11	0.128	0.0449399	DS_vs_CTL	ABCD4	3.12878e-05	TRUE	IP_IN	0.527222	0.74812
1.69289e-06	1.32902	0.177	0.108	0.0450426	DS_vs_CTL	OPHN1	3.12878e-05	TRUE	IP_IN	0.525715	1.31655
1.708e-06	0.429398	0.134	0.156	0.0454447	DS_vs_CTL	RPN2	3.14912e-05	TRUE	IP_IN	0.671013	0.898548
1.72306e-06	1.88675	0.079	0.046	0.0458455	DS_vs_CTL	ATP5MC1	3.16927e-05	TRUE	IP_IN	0.144796	0.532136
1.75106e-06	0.0487752	0.189	0.265	0.0465905	DS_vs_CTL	EEF1AKMT2	3.21307e-05	FALSE	IP_IN	1.38822	1.43064
1.79469e-06	1.18628	0.11	0.085	0.0477512	DS_vs_CTL	TRIM9	3.28526e-05	TRUE	IP_IN	0.345923	0.782807
1.81063e-06	-0.174591	0.348	0.494	0.0481755	DS_vs_CTL	NCOR1	3.30656e-05	FALSE	IP_IN	3.08006	2.72356
1.83291e-06	0.769508	0.494	0.431	0.0487681	DS_vs_CTL	ROBO1	3.33929e-05	TRUE	IP_IN	3.39704	5.78608
1.84918e-06	0.998857	0.341	0.248	0.0492011	DS_vs_CTL	TMEM108	3.35514e-05	TRUE	IP_IN	1.29186	2.57707
1.85036e-06	1.8711	0.104	0.053	0.0492325	DS_vs_CTL	CNTN1	3.35514e-05	TRUE	IP_IN	0.152173	0.553315
1.85621e-06	-0.619146	0.152	0.303	0.0493881	DS_vs_CTL	PLS3	3.35781e-05	TRUE	IP_IN	1.87038	1.21211
1.91803e-06	1.81197	0.171	0.074	0.0510331	DS_vs_CTL	IQCJ-SCHIP1	3.46148e-05	TRUE	IP_IN	0.260357	0.910706
1.95604e-06	2.1175	0.116	0.038	0.0520445	DS_vs_CTL	AC091826.2	3.5218e-05	TRUE	IP_IN	0.188854	0.816677
1.97873e-06	0.183452	0.732	0.851	0.0526481	DS_vs_CTL	DLX6-AS1	3.5543e-05	FALSE	IP_IN	12.9608	14.713
2.01742e-06	-0.133292	0.329	0.48	0.0536775	DS_vs_CTL	ATF7IP	3.61533e-05	FALSE	IP_IN	3.04372	2.7697
2.05029e-06	1.80769	0.098	0.062	0.0545521	DS_vs_CTL	PTPRM	3.66567e-05	TRUE	IP_IN	0.192578	0.670709
2.09838e-06	0.545172	0.159	0.17	0.0558315	DS_vs_CTL	ING4	3.74292e-05	TRUE	IP_IN	0.73515	1.06772
2.10565e-06	-0.721069	0.226	0.417	0.0560251	DS_vs_CTL	PAM	3.74718e-05	TRUE	IP_IN	2.78075	1.6813
2.12546e-06	0.486757	0.152	0.179	0.056552	DS_vs_CTL	CAPZA2	3.7713e-05	TRUE	IP_IN	0.876977	1.22386
2.12904e-06	-0.202192	0.232	0.356	0.0566474	DS_vs_CTL	MDK	3.7713e-05	FALSE	IP_IN	1.71055	1.48141
2.15306e-06	-0.320527	0.274	0.431	0.0572864	DS_vs_CTL	CLSPN	3.80377e-05	TRUE	IP_IN	2.78938	2.22817
2.15729e-06	-0.205097	0.488	0.662	0.057399	DS_vs_CTL	WSB1	3.80377e-05	FALSE	IP_IN	4.67545	4.05042
2.18323e-06	0.49681	0.177	0.186	0.0580893	DS_vs_CTL	CCDC82	3.84069e-05	TRUE	IP_IN	0.824129	1.15788
2.19207e-06	-0.1061	0.122	0.215	0.0583243	DS_vs_CTL	WDFY2	3.8474e-05	FALSE	IP_IN	1.14077	1.05449
2.24704e-06	1.13531	0.171	0.119	0.0597869	DS_vs_CTL	CDH11	3.93488e-05	TRUE	IP_IN	0.514858	1.12652
2.29015e-06	-0.476767	0.128	0.252	0.060934	DS_vs_CTL	POU3F3	4.00124e-05	TRUE	IP_IN	1.20086	0.857366
2.29789e-06	2.05584	0.085	0.049	0.0611399	DS_vs_CTL	RMST	4.00564e-05	TRUE	IP_IN	0.192567	0.797689
2.30987e-06	0.991642	0.341	0.226	0.0614588	DS_vs_CTL	KHDRBS2	4.0174e-05	TRUE	IP_IN	1.30905	2.59837
2.33871e-06	1.56851	0.128	0.067	0.0622262	DS_vs_CTL	ATP1A3	4.05836e-05	TRUE	IP_IN	0.262806	0.775605
2.3749e-06	1.32817	0.134	0.087	0.063189	DS_vs_CTL	LRP8	4.11185e-05	TRUE	IP_IN	0.314016	0.784234
2.3805e-06	2.01348	0.116	0.044	0.0633379	DS_vs_CTL	TRMT9B	4.11226e-05	TRUE	IP_IN	0.162003	0.651025
2.41913e-06	-0.260424	0.634	0.811	0.0643658	DS_vs_CTL	ADGRV1	4.1696e-05	TRUE	IP_IN	8.49251	7.08444
2.43306e-06	-0.19938	0.213	0.351	0.0647363	DS_vs_CTL	RPS14	4.17982e-05	FALSE	IP_IN	1.70728	1.48147
2.43596e-06	0.584114	0.457	0.438	0.0648136	DS_vs_CTL	ZSWIM6	4.17982e-05	TRUE	IP_IN	3.05345	4.57251
2.48609e-06	-0.577015	0.244	0.431	0.0661473	DS_vs_CTL	ZNF528-AS1	4.25632e-05	TRUE	IP_IN	2.92227	1.95335
2.49938e-06	0.230865	0.518	0.581	0.066501	DS_vs_CTL	SMARCC1	4.26954e-05	FALSE	IP_IN	3.91196	4.58561
2.52409e-06	-0.619076	0.207	0.372	0.0671586	DS_vs_CTL	GPSM2	4.30218e-05	TRUE	IP_IN	2.22294	1.44172
2.55411e-06	1.34056	0.152	0.095	0.0679573	DS_vs_CTL	ETV1	4.34369e-05	TRUE	IP_IN	0.485986	1.22656
2.56129e-06	0.916726	0.207	0.16	0.0681484	DS_vs_CTL	IBTK	4.34627e-05	TRUE	IP_IN	0.768206	1.44556
2.56856e-06	0.109191	0.177	0.243	0.0683417	DS_vs_CTL	EPS15L1	4.34897e-05	FALSE	IP_IN	1.17891	1.26632
2.58781e-06	-2.45834	0.018	0.128	0.068854	DS_vs_CTL	HIST1H1B	4.37192e-05	TRUE	IP_IN	0.591418	0.101651
2.63671e-06	-1.04433	0.22	0.417	0.0701548	DS_vs_CTL	MED12L	4.44473e-05	TRUE	IP_IN	3.72582	1.8008
2.72513e-06	-0.144905	0.744	0.894	0.0725075	DS_vs_CTL	SOX2-OT	4.58372e-05	FALSE	IP_IN	46.9483	42.4565
2.77141e-06	-0.802645	0.207	0.393	0.0737389	DS_vs_CTL	ABAT	4.65136e-05	TRUE	IP_IN	2.36354	1.34934
2.82042e-06	-0.324859	0.146	0.253	0.0750429	DS_vs_CTL	UBXN7	4.72328e-05	TRUE	IP_IN	1.25004	0.992505
2.84939e-06	0.0504298	0.195	0.276	0.0758138	DS_vs_CTL	MYL6	4.76141e-05	FALSE	IP_IN	1.21826	1.25628
2.91231e-06	3.39319	0.055	0.015	0.0774878	DS_vs_CTL	NDRG1	4.85596e-05	TRUE	IP_IN	0.0307313	0.324663
2.93856e-06	-0.0141706	0.323	0.424	0.0781862	DS_vs_CTL	RASA2	4.88445e-05	FALSE	IP_IN	2.44367	2.41443
2.94213e-06	-0.534568	0.774	0.898	0.0782814	DS_vs_CTL	TOX3	4.88445e-05	TRUE	IP_IN	15.6968	10.8309
2.95681e-06	1.74609	0.134	0.062	0.078672	DS_vs_CTL	C21orf62-AS1	4.89822e-05	TRUE	IP_IN	0.322968	1.07981
3.0175e-06	-0.529073	0.317	0.513	0.0802865	DS_vs_CTL	RPS24	4.98797e-05	TRUE	IP_IN	3.15193	2.17871
3.0351e-06	0.141193	0.268	0.339	0.0807549	DS_vs_CTL	HLTF	5.00629e-05	FALSE	IP_IN	1.84389	2.02821
3.08483e-06	-0.718218	0.128	0.271	0.0820781	DS_vs_CTL	LARP4B	5.07739e-05	TRUE	IP_IN	1.38302	0.835026
3.11417e-06	0.522368	0.22	0.221	0.0828589	DS_vs_CTL	RABL6	5.11472e-05	TRUE	IP_IN	1.05493	1.51018
3.13005e-06	0.311187	0.213	0.245	0.0832814	DS_vs_CTL	ULK2	5.12981e-05	TRUE	IP_IN	1.23685	1.52943
3.17557e-06	-0.380494	0.707	0.867	0.0844923	DS_vs_CTL	CCDC88A	5.1933e-05	TRUE	IP_IN	10.4492	8.02126
3.20033e-06	-0.545003	0.335	0.531	0.0851512	DS_vs_CTL	SOX2	5.21312e-05	TRUE	IP_IN	3.72313	2.54621
3.20128e-06	-1.60739	0.055	0.193	0.0851764	DS_vs_CTL	PPP1R14B	5.21312e-05	TRUE	IP_IN	0.826678	0.265457
3.26448e-06	-0.696802	0.262	0.453	0.0868581	DS_vs_CTL	NCAPG2	5.30094e-05	TRUE	IP_IN	2.81977	1.73399
3.27024e-06	0.783972	0.213	0.17	0.0870112	DS_vs_CTL	MEX3A	5.30094e-05	TRUE	IP_IN	0.729316	1.25098
3.27594e-06	-0.37955	0.805	0.929	0.0871629	DS_vs_CTL	ZNF704	5.30094e-05	TRUE	IP_IN	15.5281	11.9306
3.30551e-06	-0.299216	0.049	0.11	0.0879496	DS_vs_CTL	KPNA2	5.33753e-05	TRUE	IP_IN	0.493042	0.395205
3.37009e-06	2.02117	0.073	0.05	0.0896679	DS_vs_CTL	HS6ST3	5.43037e-05	TRUE	IP_IN	0.128099	0.516923
3.3844e-06	-0.613906	0.524	0.715	0.0900488	DS_vs_CTL	ATRNL1	5.43907e-05	TRUE	IP_IN	8.47403	5.53154
3.39246e-06	0.332263	0.134	0.169	0.0902632	DS_vs_CTL	ZNF138	5.43907e-05	TRUE	IP_IN	0.855079	1.07138
3.3969e-06	0.357139	0.128	0.161	0.0903814	DS_vs_CTL	LIMD2	5.43907e-05	TRUE	IP_IN	0.59101	0.751879
3.40385e-06	0.298066	0.457	0.517	0.0905663	DS_vs_CTL	BRCA1	5.43907e-05	TRUE	IP_IN	3.56231	4.37466
3.41943e-06	1.18923	0.299	0.17	0.0909809	DS_vs_CTL	DCC	5.45261e-05	TRUE	IP_IN	1.75542	3.99852
3.43975e-06	-3.01273	0.006	0.094	0.0915213	DS_vs_CTL	ANAPC11	5.47362e-05	TRUE	IP_IN	0.389686	0.0422783
3.47039e-06	0.418391	0.195	0.215	0.0923365	DS_vs_CTL	STRN	5.50384e-05	TRUE	IP_IN	1.11324	1.48268
3.47309e-06	1.15274	0.128	0.091	0.0924085	DS_vs_CTL	UCHL3	5.50384e-05	TRUE	IP_IN	0.387398	0.856899
3.49216e-06	0.250526	0.073	0.112	0.092916	DS_vs_CTL	CAAP1	5.52266e-05	TRUE	IP_IN	0.547594	0.646235
3.53492e-06	-1.64831	0.073	0.225	0.0940536	DS_vs_CTL	GABRA2	5.57877e-05	TRUE	IP_IN	1.31606	0.413984
3.58824e-06	-0.926026	0.189	0.376	0.0954723	DS_vs_CTL	SEMA6D	5.65129e-05	TRUE	IP_IN	2.69502	1.41271
3.59857e-06	-0.511553	0.25	0.424	0.0957471	DS_vs_CTL	FGFR2	5.65595e-05	TRUE	IP_IN	2.68127	1.87525
3.61794e-06	-0.518696	0.159	0.299	0.0962626	DS_vs_CTL	OSBPL9	5.67477e-05	TRUE	IP_IN	1.66802	1.15871
3.65963e-06	-0.568116	0.494	0.694	0.0973717	DS_vs_CTL	MED13L	5.72844e-05	TRUE	IP_IN	6.46247	4.35332
3.69556e-06	0.487662	0.72	0.673	0.0983277	DS_vs_CTL	AP001347.1	5.77235e-05	TRUE	IP_IN	6.0342	8.45593
3.70273e-06	0.549762	0.524	0.486	0.0985186	DS_vs_CTL	PTPRS	5.77235e-05	TRUE	IP_IN	2.97904	4.35585
3.73553e-06	-0.751394	0.28	0.473	0.0993913	DS_vs_CTL	RPL41	5.81167e-05	TRUE	IP_IN	2.97828	1.76353
3.78655e-06	3.79789	0.067	0.007	0.100749	DS_vs_CTL	NEFL	5.87535e-05	TRUE	IP_IN	0.0233515	0.329128
3.80161e-06	-0.0606948	0.159	0.233	0.10115	DS_vs_CTL	NHLRC2	5.87535e-05	FALSE	IP_IN	1.14597	1.09338
3.8024e-06	0.492422	0.098	0.114	0.10117	DS_vs_CTL	PPP1R10	5.87535e-05	TRUE	IP_IN	0.503203	0.702866
3.8071e-06	-0.388324	0.152	0.269	0.101296	DS_vs_CTL	ZNF326	5.87535e-05	TRUE	IP_IN	1.35417	1.02908
3.82655e-06	-0.419434	0.244	0.402	0.101813	DS_vs_CTL	RPS15	5.8935e-05	TRUE	IP_IN	2.40338	1.79151
3.90289e-06	1.31377	0.122	0.076	0.103844	DS_vs_CTL	MDH1	5.99845e-05	TRUE	IP_IN	0.303651	0.750616
3.91033e-06	2.1712	0.091	0.047	0.104042	DS_vs_CTL	ULK3	5.99845e-05	TRUE	IP_IN	0.096594	0.432342
3.91901e-06	-0.339531	0.171	0.303	0.104273	DS_vs_CTL	USP32	5.99977e-05	TRUE	IP_IN	1.78036	1.40151
3.93653e-06	-0.624062	0.25	0.431	0.104739	DS_vs_CTL	RPS8	6.01457e-05	TRUE	IP_IN	2.54858	1.64801
3.95125e-06	0.137937	0.323	0.405	0.105131	DS_vs_CTL	GAPDH	6.02507e-05	FALSE	IP_IN	1.88203	2.06558
4.02881e-06	-1.68269	0.049	0.18	0.107194	DS_vs_CTL	EML5	6.13114e-05	TRUE	IP_IN	0.932021	0.284462
4.0922e-06	0.184394	0.53	0.619	0.108881	DS_vs_CTL	ACTB	6.21528e-05	FALSE	IP_IN	3.93116	4.46189
4.11572e-06	0.465835	0.091	0.106	0.109507	DS_vs_CTL	SMG9	6.22043e-05	TRUE	IP_IN	0.470483	0.644732
4.12305e-06	-0.403442	0.268	0.434	0.109702	DS_vs_CTL	TOP2B	6.22043e-05	TRUE	IP_IN	2.60132	1.9612
4.12775e-06	-0.813792	0.207	0.396	0.109827	DS_vs_CTL	SUPT3H	6.22043e-05	TRUE	IP_IN	2.71791	1.54051
4.12835e-06	-0.147702	0.171	0.27	0.109843	DS_vs_CTL	RNF169	6.22043e-05	FALSE	IP_IN	1.42173	1.27796
4.13614e-06	0.129958	0.14	0.194	0.11005	DS_vs_CTL	BMT2	6.22043e-05	FALSE	IP_IN	0.981465	1.0687
4.15433e-06	0.128972	0.348	0.444	0.110534	DS_vs_CTL	RPS2	6.23556e-05	FALSE	IP_IN	2.37949	2.59673
4.23375e-06	0.499266	0.494	0.465	0.112647	DS_vs_CTL	GATAD2B	6.34236e-05	TRUE	IP_IN	2.94832	4.1624
4.25059e-06	-0.63307	0.085	0.197	0.113095	DS_vs_CTL	AP3B2	6.35516e-05	TRUE	IP_IN	0.990307	0.632939
4.30006e-06	-0.603896	0.25	0.432	0.114412	DS_vs_CTL	VRK1	6.41663e-05	TRUE	IP_IN	2.66024	1.74477
4.3368e-06	-0.847939	0.213	0.401	0.115389	DS_vs_CTL	DACH1	6.45889e-05	TRUE	IP_IN	3.25698	1.80382
4.49365e-06	-0.152499	0.47	0.624	0.119562	DS_vs_CTL	PHACTR4	6.67467e-05	FALSE	IP_IN	5.01219	4.504
4.4991e-06	0.763746	0.256	0.217	0.119707	DS_vs_CTL	CBLB	6.67467e-05	TRUE	IP_IN	1.0634	1.80073
4.5089e-06	0.442734	0.183	0.207	0.119968	DS_vs_CTL	DLX5	6.67631e-05	TRUE	IP_IN	1.01796	1.37851
4.56428e-06	0.73162	0.128	0.116	0.121442	DS_vs_CTL	ESCO1	6.72919e-05	TRUE	IP_IN	0.522138	0.86216
4.56737e-06	-0.203348	0.354	0.496	0.121524	DS_vs_CTL	HNRNPC	6.72919e-05	FALSE	IP_IN	3.08604	2.67488
4.57094e-06	-0.939355	0.159	0.332	0.121619	DS_vs_CTL	NUF2	6.72919e-05	TRUE	IP_IN	1.93335	1.00247
4.58556e-06	-0.442664	0.122	0.23	0.122008	DS_vs_CTL	NUP98	6.73778e-05	TRUE	IP_IN	1.19338	0.872516
4.61217e-06	0.59955	0.152	0.154	0.122716	DS_vs_CTL	FSCN1	6.75292e-05	TRUE	IP_IN	0.654543	0.986832
4.61347e-06	-0.674801	0.152	0.307	0.12275	DS_vs_CTL	RPL39	6.75292e-05	TRUE	IP_IN	1.49979	0.933871
4.64156e-06	0.114434	0.134	0.19	0.123498	DS_vs_CTL	GLYR1	6.7811e-05	FALSE	IP_IN	0.922187	0.993029
4.66204e-06	0.734516	0.146	0.131	0.124043	DS_vs_CTL	BSG	6.79807e-05	TRUE	IP_IN	0.540621	0.894658
4.69034e-06	1.5334	0.11	0.07	0.124796	DS_vs_CTL	SGIP1	6.8154e-05	TRUE	IP_IN	0.249724	0.718942
4.69169e-06	-0.616833	0.183	0.343	0.124832	DS_vs_CTL	ZRANB2	6.8154e-05	TRUE	IP_IN	1.8388	1.19347
4.73802e-06	-0.278846	0.256	0.388	0.126065	DS_vs_CTL	HECTD1	6.86968e-05	TRUE	IP_IN	2.12846	1.7489
4.80017e-06	-0.611168	0.146	0.296	0.127718	DS_vs_CTL	RPLP2	6.93542e-05	TRUE	IP_IN	1.44964	0.943425
4.80144e-06	0.504802	0.604	0.591	0.127752	DS_vs_CTL	CELF2	6.93542e-05	TRUE	IP_IN	3.78858	5.37069
4.91574e-06	1.67009	0.104	0.07	0.130793	DS_vs_CTL	PPP2R2B	7.08717e-05	TRUE	IP_IN	0.195802	0.619401
4.96212e-06	-0.180834	0.25	0.378	0.132027	DS_vs_CTL	RB1	7.14061e-05	FALSE	IP_IN	2.37039	2.08571
4.99578e-06	-0.087377	0.134	0.214	0.132923	DS_vs_CTL	VIM	7.17359e-05	FALSE	IP_IN	0.926155	0.866336
5.00374e-06	-0.0242385	0.287	0.38	0.133135	DS_vs_CTL	ZC3H12C	7.17359e-05	FALSE	IP_IN	2.1352	2.09427
5.0207e-06	1.07181	0.146	0.113	0.133586	DS_vs_CTL	STIM1	7.18447e-05	TRUE	IP_IN	0.55421	1.16047
5.07875e-06	-0.284938	0.28	0.432	0.13513	DS_vs_CTL	RBM39	7.25401e-05	TRUE	IP_IN	2.38504	1.9521
5.11918e-06	0.962642	0.207	0.167	0.136206	DS_vs_CTL	DMD	7.29817e-05	TRUE	IP_IN	0.767092	1.49033
5.14017e-06	0.00450521	0.11	0.164	0.136765	DS_vs_CTL	FAM126B	7.30673e-05	FALSE	IP_IN	0.788113	0.785234
5.14424e-06	-1.16232	0.122	0.287	0.136873	DS_vs_CTL	KIF13A	7.30673e-05	TRUE	IP_IN	1.84383	0.818049
5.16665e-06	-0.48851	0.122	0.239	0.137469	DS_vs_CTL	RPL35	7.325e-05	TRUE	IP_IN	1.06638	0.754508
5.23745e-06	0.656734	0.287	0.249	0.139353	DS_vs_CTL	VGLL4	7.41166e-05	TRUE	IP_IN	1.24081	1.95124
5.30055e-06	0.563572	0.25	0.244	0.141032	DS_vs_CTL	ZNF821	7.48107e-05	TRUE	IP_IN	1.27531	1.87983
5.306e-06	3.49191	0.067	0.016	0.141177	DS_vs_CTL	GLIS3	7.48107e-05	TRUE	IP_IN	0.0508047	0.573923
5.33688e-06	0.50547	0.091	0.112	0.141998	DS_vs_CTL	PSMG4	7.5108e-05	TRUE	IP_IN	0.474077	0.66796
5.35528e-06	0.0117801	0.274	0.368	0.142488	DS_vs_CTL	USP15	7.52289e-05	FALSE	IP_IN	2.04911	2.06057
5.37702e-06	0.803229	0.421	0.318	0.143066	DS_vs_CTL	AFF3	7.53962e-05	TRUE	IP_IN	1.93602	3.37357
5.50213e-06	1.32101	0.14	0.082	0.146395	DS_vs_CTL	SFXN2	7.6843e-05	TRUE	IP_IN	0.373936	0.930021
5.50918e-06	0.909641	0.244	0.185	0.146583	DS_vs_CTL	VAMP2	7.6843e-05	TRUE	IP_IN	0.792827	1.4847
5.51026e-06	-0.0560507	0.146	0.224	0.146611	DS_vs_CTL	PUM3	7.6843e-05	FALSE	IP_IN	1.17749	1.12724
5.77967e-06	0.412192	0.024	0.052	0.15378	DS_vs_CTL	PSMD13	8.04539e-05	TRUE	IP_IN	0.161537	0.20986
5.84225e-06	-0.310544	0.213	0.346	0.155445	DS_vs_CTL	ADGRA3	8.10673e-05	TRUE	IP_IN	1.97214	1.58472
5.84996e-06	-0.218996	0.268	0.403	0.15565	DS_vs_CTL	SRSF7	8.10673e-05	FALSE	IP_IN	2.09987	1.79867
5.85545e-06	-0.358236	0.287	0.441	0.155796	DS_vs_CTL	WNK1	8.10673e-05	TRUE	IP_IN	2.59792	2.02117
5.9332e-06	1.21119	0.152	0.104	0.157865	DS_vs_CTL	APC2	8.18631e-05	TRUE	IP_IN	0.389415	0.897244
5.93427e-06	1.73655	0.122	0.062	0.157893	DS_vs_CTL	NCAN	8.18631e-05	TRUE	IP_IN	0.202179	0.670139
5.96363e-06	0.283761	0.098	0.126	0.158674	DS_vs_CTL	SS18L2	8.20209e-05	TRUE	IP_IN	0.593121	0.716861
5.9671e-06	1.19595	0.146	0.095	0.158767	DS_vs_CTL	EGFR	8.20209e-05	TRUE	IP_IN	0.415288	0.947027
6.01343e-06	3.41807	0.073	0.012	0.159999	DS_vs_CTL	APOE	8.2392e-05	TRUE	IP_IN	0.0494086	0.530063
6.01558e-06	-3.34308	0.006	0.095	0.160057	DS_vs_CTL	LINC01305	8.2392e-05	TRUE	IP_IN	0.462604	0.0395635
6.03942e-06	0.544653	0.53	0.504	0.160691	DS_vs_CTL	TUBB3	8.2571e-05	TRUE	IP_IN	2.81072	4.09491
6.15463e-06	0.751162	0.183	0.191	0.163756	DS_vs_CTL	NTN1	8.39965e-05	TRUE	IP_IN	1.16081	1.94898
6.20613e-06	-0.850631	0.122	0.269	0.165126	DS_vs_CTL	NECTIN3	8.44076e-05	TRUE	IP_IN	1.54447	0.850795
6.20676e-06	0.61035	0.39	0.324	0.165143	DS_vs_CTL	DYNC1H1	8.44076e-05	TRUE	IP_IN	1.64552	2.50715
6.27533e-06	0.709339	0.195	0.173	0.166968	DS_vs_CTL	KIF3A	8.51261e-05	TRUE	IP_IN	0.77187	1.25718
6.2818e-06	-0.815901	0.128	0.277	0.16714	DS_vs_CTL	ST8SIA4	8.51261e-05	TRUE	IP_IN	1.55219	0.876056
6.34393e-06	1.57448	0.195	0.086	0.168793	DS_vs_CTL	FGF12	8.58165e-05	TRUE	IP_IN	0.373048	1.10718
6.41907e-06	0.933125	0.11	0.092	0.170792	DS_vs_CTL	PIP4K2B	8.66313e-05	TRUE	IP_IN	0.359576	0.681914
6.42675e-06	0.0916095	0.213	0.273	0.170997	DS_vs_CTL	HNRNPL	8.66313e-05	FALSE	IP_IN	1.31553	1.39647
6.51338e-06	0.211907	0.305	0.368	0.173301	DS_vs_CTL	HDAC4	8.74917e-05	FALSE	IP_IN	2.05927	2.37985
6.5134e-06	0.755438	0.116	0.108	0.173302	DS_vs_CTL	VPS51	8.74917e-05	TRUE	IP_IN	0.484609	0.81326
6.64053e-06	0.474257	0.177	0.188	0.176685	DS_vs_CTL	UHRF1BP1L	8.90435e-05	TRUE	IP_IN	0.902329	1.24846
6.66109e-06	0.0379083	0.323	0.412	0.177232	DS_vs_CTL	NR2C2	8.91296e-05	FALSE	IP_IN	2.50291	2.56422
6.68806e-06	0.491211	0.213	0.216	0.177949	DS_vs_CTL	SCAF4	8.91296e-05	TRUE	IP_IN	1.06217	1.48797
6.69161e-06	0.393215	0.713	0.71	0.178044	DS_vs_CTL	SETBP1	8.91296e-05	TRUE	IP_IN	6.89134	9.04541
6.69344e-06	2.87675	0.067	0.017	0.178092	DS_vs_CTL	AC023095.1	8.91296e-05	TRUE	IP_IN	0.0740866	0.543579
6.76086e-06	0.121562	0.165	0.229	0.179886	DS_vs_CTL	WASF2	8.98714e-05	FALSE	IP_IN	1.20146	1.3018
6.82954e-06	0.339334	0.402	0.433	0.181713	DS_vs_CTL	ELAVL3	9.06272e-05	TRUE	IP_IN	2.62492	3.31583
6.91534e-06	0.0187076	0.409	0.511	0.183996	DS_vs_CTL	DDX5	9.16073e-05	FALSE	IP_IN	2.4607	2.48748
7.05721e-06	0.064086	0.116	0.176	0.187771	DS_vs_CTL	MARF1	9.33059e-05	FALSE	IP_IN	0.821091	0.853074
7.0733e-06	-0.75466	0.061	0.155	0.188199	DS_vs_CTL	SKA3	9.33059e-05	TRUE	IP_IN	0.75458	0.441577
7.08005e-06	0.295154	0.195	0.237	0.188379	DS_vs_CTL	TMEM259	9.33059e-05	TRUE	IP_IN	0.93662	1.14407
7.13743e-06	-0.241112	0.335	0.49	0.189906	DS_vs_CTL	BIRC6	9.39007e-05	FALSE	IP_IN	3.14723	2.65738
7.33138e-06	-0.203543	0.366	0.512	0.195066	DS_vs_CTL	RBMX	9.62872e-05	FALSE	IP_IN	2.98766	2.58908
7.35105e-06	0.669239	0.104	0.116	0.195589	DS_vs_CTL	ARHGEF18	9.63804e-05	TRUE	IP_IN	0.566772	0.896396
7.47838e-06	-0.287477	0.415	0.585	0.198977	DS_vs_CTL	H3F3A	9.78825e-05	TRUE	IP_IN	3.78439	3.0952
7.60607e-06	-0.242352	0.177	0.28	0.202375	DS_vs_CTL	EEF1D	9.93842e-05	FALSE	IP_IN	1.27634	1.07351
7.63357e-06	0.111314	0.537	0.634	0.203106	DS_vs_CTL	ARHGAP21	9.9574e-05	FALSE	IP_IN	4.65419	5.02222
7.68511e-06	2.99964	0.067	0.015	0.204478	DS_vs_CTL	STON2	0.000100076	TRUE	IP_IN	0.0608913	0.486915
7.70646e-06	0.346274	0.14	0.176	0.205046	DS_vs_CTL	ZBTB18	0.000100184	TRUE	IP_IN	0.676998	0.855505
7.85398e-06	0.588112	0.195	0.2	0.208971	DS_vs_CTL	2024-03-05	0.000101929	TRUE	IP_IN	0.977568	1.46459
7.88083e-06	-0.342934	0.159	0.276	0.209685	DS_vs_CTL	HNRNPK	0.000102105	TRUE	IP_IN	1.22978	0.964094
7.97914e-06	0.906487	0.384	0.279	0.212301	DS_vs_CTL	AC099792.1	0.000103204	TRUE	IP_IN	2.16331	4.05039
8.03359e-06	0.262443	0.244	0.285	0.21375	DS_vs_CTL	UPF3B	0.000103733	TRUE	IP_IN	1.53881	1.84061
8.05894e-06	0.0754408	0.329	0.414	0.214424	DS_vs_CTL	RBM25	0.000103886	FALSE	IP_IN	2.28466	2.402
8.08518e-06	-0.125995	0.189	0.282	0.215122	DS_vs_CTL	PPIP5K2	0.000103993	FALSE	IP_IN	1.41017	1.28683
8.10119e-06	0.0937655	0.128	0.18	0.215548	DS_vs_CTL	INPP4A	0.000103993	FALSE	IP_IN	0.846713	0.898275
8.12474e-06	-0.415562	0.409	0.587	0.216175	DS_vs_CTL	PNN	0.000103993	TRUE	IP_IN	3.80293	2.84563
8.13473e-06	-0.391427	0.244	0.393	0.216441	DS_vs_CTL	SPC25	0.000103993	TRUE	IP_IN	2.22865	1.69354
8.14373e-06	0.812526	0.055	0.062	0.21668	DS_vs_CTL	DDX19A	0.000103993	TRUE	IP_IN	0.270791	0.470808
8.1486e-06	1.46217	0.171	0.099	0.21681	DS_vs_CTL	PCLO	0.000103993	TRUE	IP_IN	0.450581	1.23743
8.26663e-06	-0.522313	0.555	0.74	0.21995	DS_vs_CTL	TEAD1	0.000105324	TRUE	IP_IN	7.32809	5.09664
8.33509e-06	-0.460188	0.11	0.206	0.221772	DS_vs_CTL	FAM193B	0.00010602	TRUE	IP_IN	0.950508	0.685364
8.42414e-06	0.682693	0.384	0.318	0.224141	DS_vs_CTL	C11orf49	0.000106975	TRUE	IP_IN	1.96159	3.14372
8.49465e-06	-0.0157076	0.366	0.478	0.226017	DS_vs_CTL	TTLL7	0.000107586	FALSE	IP_IN	2.88391	2.84733
8.50028e-06	0.444472	0.47	0.435	0.226167	DS_vs_CTL	GSE1	0.000107586	TRUE	IP_IN	2.60307	3.53723
8.53033e-06	-1.21379	0.11	0.267	0.226967	DS_vs_CTL	KIAA0408	0.000107789	TRUE	IP_IN	1.33447	0.569564
8.60448e-06	-0.254207	0.049	0.103	0.228939	DS_vs_CTL	CDAN1	0.000108547	TRUE	IP_IN	0.451179	0.372822
8.65726e-06	1.66226	0.073	0.059	0.230344	DS_vs_CTL	GRM7	0.000109033	TRUE	IP_IN	0.133235	0.417985
8.67261e-06	-1.63118	0.049	0.175	0.230752	DS_vs_CTL	RAN	0.000109047	TRUE	IP_IN	0.777707	0.245207
8.80102e-06	-0.956706	0.024	0.091	0.234169	DS_vs_CTL	PCNA	0.000110481	TRUE	IP_IN	0.380635	0.190405
8.90871e-06	0.240407	0.238	0.269	0.237034	DS_vs_CTL	MTG1	0.00011165	FALSE	IP_IN	1.27034	1.49548
8.98182e-06	-0.0870477	0.268	0.38	0.238979	DS_vs_CTL	CNOT2	0.000112383	FALSE	IP_IN	2.06485	1.93855
9.09058e-06	-0.534252	0.311	0.494	0.241873	DS_vs_CTL	ZMYM4	0.000113558	TRUE	IP_IN	3.11053	2.14229
9.18787e-06	-0.595259	0.14	0.265	0.244462	DS_vs_CTL	DICER1	0.000114587	TRUE	IP_IN	1.30985	0.861422
9.24353e-06	-0.22748	0.207	0.321	0.245943	DS_vs_CTL	CCNL2	0.000115094	FALSE	IP_IN	1.39454	1.18566
9.33119e-06	-0.389075	0.085	0.175	0.248275	DS_vs_CTL	H1F0	0.000115997	TRUE	IP_IN	0.843278	0.638419
9.37595e-06	-1.08498	0.104	0.252	0.249466	DS_vs_CTL	RPL10A	0.000116365	TRUE	IP_IN	1.19429	0.557242
9.41732e-06	1.09246	0.183	0.124	0.250567	DS_vs_CTL	HOOK2	0.00011669	TRUE	IP_IN	0.562331	1.1946
9.46035e-06	-0.105161	0.213	0.32	0.251712	DS_vs_CTL	DTL	0.000117034	FALSE	IP_IN	1.99234	1.84688
9.55116e-06	-0.263056	0.293	0.435	0.254128	DS_vs_CTL	RPL5	0.000117967	TRUE	IP_IN	2.32135	1.92896
9.62242e-06	0.26432	0.11	0.143	0.256024	DS_vs_CTL	ZNF529	0.000118656	TRUE	IP_IN	0.6402	0.763729
9.77059e-06	0.292498	0.396	0.437	0.259966	DS_vs_CTL	PGAP1	0.00012029	TRUE	IP_IN	2.41592	2.95374
9.82332e-06	-0.136055	0.232	0.34	0.261369	DS_vs_CTL	SCN8A	0.000120745	FALSE	IP_IN	1.93304	1.75366
1.00143e-05	0.227403	0.329	0.39	0.26645	DS_vs_CTL	TNPO1	0.000122895	FALSE	IP_IN	2.16854	2.53354
1.00807e-05	0.00998722	0.122	0.189	0.268216	DS_vs_CTL	AC104073.4	0.000123512	FALSE	IP_IN	0.984036	0.98553
1.01089e-05	0.226755	0.091	0.137	0.268967	DS_vs_CTL	COX7C	0.000123661	FALSE	IP_IN	0.560618	0.650816
1.02069e-05	-0.89455	0.079	0.194	0.271576	DS_vs_CTL	AC092821.3	0.000124661	TRUE	IP_IN	0.976361	0.519505
1.02794e-05	1.04214	0.091	0.072	0.273504	DS_vs_CTL	DKC1	0.000125347	TRUE	IP_IN	0.301373	0.61606
1.0407e-05	-0.566379	0.146	0.277	0.276899	DS_vs_CTL	RPS5	0.000126646	TRUE	IP_IN	1.36189	0.91411
1.04189e-05	0.985065	0.22	0.149	0.277217	DS_vs_CTL	CALD1	0.000126646	TRUE	IP_IN	0.768754	1.51706
1.04985e-05	-0.576372	0.274	0.453	0.279334	DS_vs_CTL	FMNL2	0.000127323	TRUE	IP_IN	3.02507	2.02316
1.05079e-05	-0.274426	0.268	0.414	0.279583	DS_vs_CTL	SMARCA2	0.000127323	TRUE	IP_IN	2.61754	2.15865
1.05852e-05	0.0478563	0.53	0.643	0.28164	DS_vs_CTL	NASP	0.000128057	FALSE	IP_IN	4.67878	4.83126
1.06269e-05	-0.596618	0.165	0.308	0.282749	DS_vs_CTL	RPS18	0.000128359	TRUE	IP_IN	1.51039	0.993221
1.06483e-05	2.70616	0.079	0.021	0.28332	DS_vs_CTL	SAMD4A	0.000128416	TRUE	IP_IN	0.0930792	0.606221
1.07549e-05	-1.40213	0.03	0.125	0.286156	DS_vs_CTL	HLA-A	0.000129498	TRUE	IP_IN	0.543117	0.199686
1.07727e-05	-0.0190722	0.317	0.414	0.286629	DS_vs_CTL	UHRF2	0.000129509	FALSE	IP_IN	2.39495	2.35814
1.08441e-05	0.38432	0.146	0.169	0.288528	DS_vs_CTL	TTC1	0.000130105	TRUE	IP_IN	0.829652	1.07778
1.08562e-05	-0.0428469	0.598	0.735	0.28885	DS_vs_CTL	NSD2	0.000130105	FALSE	IP_IN	6.86906	6.66269
1.09454e-05	1.99138	0.085	0.044	0.291223	DS_vs_CTL	HCN1	0.000130969	TRUE	IP_IN	0.161515	0.6391
1.11428e-05	1.1056	0.134	0.104	0.296476	DS_vs_CTL	SEZ6	0.000133123	TRUE	IP_IN	0.380516	0.814347
1.12067e-05	0.799256	0.232	0.192	0.298176	DS_vs_CTL	AC068587.4	0.000133678	TRUE	IP_IN	1.15426	2.00386
1.12533e-05	1.32815	0.244	0.131	0.299416	DS_vs_CTL	FHIT	0.000133831	TRUE	IP_IN	0.961805	2.4107
1.12544e-05	-1.0444	0.104	0.248	0.299445	DS_vs_CTL	FAM111A	0.000133831	TRUE	IP_IN	1.291	0.620202
1.13473e-05	0.476578	0.165	0.173	0.301916	DS_vs_CTL	SCARB2	0.000134727	TRUE	IP_IN	0.792507	1.09767
1.13886e-05	2.11661	0.116	0.045	0.303017	DS_vs_CTL	SORCS1	0.000135009	TRUE	IP_IN	0.188361	0.814028
1.15582e-05	-0.736484	0.091	0.206	0.307528	DS_vs_CTL	LRCH2	0.000136643	TRUE	IP_IN	0.962833	0.572246
1.15621e-05	0.988442	0.11	0.089	0.307632	DS_vs_CTL	CSNK1D	0.000136643	TRUE	IP_IN	0.361271	0.712167
1.1646e-05	2.7747	0.085	0.017	0.309866	DS_vs_CTL	EVA1C	0.000137423	TRUE	IP_IN	0.072906	0.49796
1.1676e-05	0.671185	0.14	0.127	0.310662	DS_vs_CTL	SUN2	0.000137565	TRUE	IP_IN	0.519695	0.82265
1.18101e-05	0.0175797	0.293	0.378	0.314231	DS_vs_CTL	CEP135	0.000138932	FALSE	IP_IN	2.155	2.17609
1.18321e-05	-0.868306	0.116	0.259	0.314818	DS_vs_CTL	TXNDC16	0.000138978	TRUE	IP_IN	1.40372	0.763259
1.18902e-05	0.561472	0.146	0.146	0.316362	DS_vs_CTL	VCP	0.000139446	TRUE	IP_IN	0.641837	0.942217
1.19234e-05	1.04958	0.171	0.113	0.317247	DS_vs_CTL	PCGF6	0.000139623	TRUE	IP_IN	0.528011	1.0884
1.21502e-05	0.376581	0.341	0.351	0.323281	DS_vs_CTL	RND3	0.000142061	TRUE	IP_IN	2.04053	2.64402
1.21908e-05	-0.302897	0.079	0.153	0.324361	DS_vs_CTL	RPS20	0.000142319	TRUE	IP_IN	0.613645	0.491945
1.22106e-05	0.844865	0.39	0.303	0.324887	DS_vs_CTL	NAALADL2	0.000142333	TRUE	IP_IN	2.29882	4.12415
1.22389e-05	0.336424	0.073	0.096	0.325641	DS_vs_CTL	PEX26	0.000142447	TRUE	IP_IN	0.421409	0.526931
1.22773e-05	0.276348	0.25	0.278	0.326661	DS_vs_CTL	KLC1	0.000142677	TRUE	IP_IN	1.30961	1.58091
1.24046e-05	0.341962	0.445	0.486	0.33005	DS_vs_CTL	NLGN4X	0.000143939	TRUE	IP_IN	3.53956	4.48117
1.24789e-05	-0.764303	0.128	0.269	0.332025	DS_vs_CTL	AASS	0.000144581	TRUE	IP_IN	1.39951	0.818287
1.25922e-05	-0.560941	0.262	0.435	0.33504	DS_vs_CTL	SENP6	0.000145494	TRUE	IP_IN	2.58105	1.744
1.25956e-05	-0.312585	0.22	0.348	0.33513	DS_vs_CTL	YBX1	0.000145494	TRUE	IP_IN	1.71295	1.37377
1.28581e-05	0.507489	0.305	0.282	0.342116	DS_vs_CTL	YLPM1	0.000148137	TRUE	IP_IN	1.39043	1.97157
1.2863e-05	1.20104	0.11	0.085	0.342247	DS_vs_CTL	TMEFF2	0.000148137	TRUE	IP_IN	0.377469	0.863449
1.29476e-05	0.977919	0.256	0.17	0.344496	DS_vs_CTL	NBEAL1	0.000148814	TRUE	IP_IN	0.819951	1.61037
1.29606e-05	0.799033	0.201	0.168	0.344843	DS_vs_CTL	AKAP8L	0.000148814	TRUE	IP_IN	0.725524	1.25757
1.299e-05	0.249587	0.14	0.176	0.345624	DS_vs_CTL	TCEA1	0.000148928	FALSE	IP_IN	0.829537	0.981005
1.30835e-05	0.616175	0.256	0.233	0.348113	DS_vs_CTL	SRGAP2B	0.000149777	TRUE	IP_IN	1.19443	1.82589
1.31584e-05	0.194735	0.329	0.393	0.350106	DS_vs_CTL	RPL32	0.00015041	FALSE	IP_IN	2.03536	2.32426
1.31939e-05	-1.39779	0.091	0.239	0.351049	DS_vs_CTL	GRIA4	0.000150591	TRUE	IP_IN	2.01743	0.759822
1.32456e-05	-0.125635	0.11	0.183	0.352425	DS_vs_CTL	PRDX2	0.000150894	FALSE	IP_IN	0.789857	0.718573
1.32598e-05	-0.319036	0.195	0.325	0.352804	DS_vs_CTL	MEIS1	0.000150894	TRUE	IP_IN	1.88184	1.503
1.35473e-05	2.33056	0.104	0.035	0.360454	DS_vs_CTL	GRIN2B	0.000153938	TRUE	IP_IN	0.113185	0.566998
1.36877e-05	-0.0736207	0.341	0.458	0.364189	DS_vs_CTL	ATXN10	0.000155303	FALSE	IP_IN	2.87105	2.72283
1.39458e-05	-0.645602	0.177	0.33	0.371055	DS_vs_CTL	C2CD5	0.000157997	TRUE	IP_IN	1.70815	1.08628
1.39925e-05	0.268108	0.323	0.356	0.372297	DS_vs_CTL	PHF20	0.000158225	TRUE	IP_IN	2.01377	2.41984
1.40071e-05	-0.529532	0.11	0.212	0.372688	DS_vs_CTL	PSMA3-AS1	0.000158225	TRUE	IP_IN	0.965081	0.663011
1.40293e-05	0.890936	0.25	0.191	0.373278	DS_vs_CTL	EPS8	0.000158243	TRUE	IP_IN	1.0086	1.86563
1.41238e-05	1.6368	0.11	0.05	0.375791	DS_vs_CTL	SCYL1	0.000159074	TRUE	IP_IN	0.199805	0.617582
1.45009e-05	0.527509	0.091	0.104	0.385824	DS_vs_CTL	ZMIZ2	0.000163082	TRUE	IP_IN	0.39303	0.561514
1.45551e-05	0.364048	0.189	0.215	0.387267	DS_vs_CTL	UIMC1	0.000163452	TRUE	IP_IN	1.03744	1.33009
1.46553e-05	4.00589	0.061	0.006	0.389934	DS_vs_CTL	LINC01117	0.000164225	TRUE	IP_IN	0.0328992	0.534503
1.46829e-05	2.53711	0.067	0.026	0.390668	DS_vs_CTL	RYR2	0.000164225	TRUE	IP_IN	0.065794	0.380145
1.46882e-05	-0.316336	0.854	0.947	0.390808	DS_vs_CTL	DCLK2	0.000164225	TRUE	IP_IN	21.2092	17.0278
1.48403e-05	-0.971533	0.067	0.181	0.394857	DS_vs_CTL	DSEL	0.000165685	TRUE	IP_IN	0.909718	0.458208
1.49373e-05	-0.633829	0.262	0.441	0.397437	DS_vs_CTL	BTRC	0.000166525	TRUE	IP_IN	2.80994	1.80529
1.4968e-05	-0.537921	0.067	0.149	0.398252	DS_vs_CTL	EPM2AIP1	0.000166624	TRUE	IP_IN	0.666284	0.453331
1.49976e-05	-0.891625	0.091	0.217	0.39904	DS_vs_CTL	SPTLC1	0.000166712	TRUE	IP_IN	1.06803	0.56998
1.51455e-05	-1.0094	0.177	0.351	0.402976	DS_vs_CTL	KIF20B	0.000168113	TRUE	IP_IN	2.07759	1.02632
1.52457e-05	-0.00308733	0.402	0.51	0.405642	DS_vs_CTL	EHBP1	0.00016898	FALSE	IP_IN	3.39903	3.38641
1.55528e-05	2.3625	0.073	0.027	0.413813	DS_vs_CTL	EMID1	0.000172136	TRUE	IP_IN	0.0928909	0.475466
1.55905e-05	0.321745	0.5	0.506	0.414816	DS_vs_CTL	PUM1	0.000172304	TRUE	IP_IN	3.14691	3.92798
1.57139e-05	0.367255	0.488	0.514	0.418101	DS_vs_CTL	RASAL2	0.000173419	TRUE	IP_IN	3.70345	4.77194
1.57953e-05	0.246542	0.409	0.446	0.420266	DS_vs_CTL	SPATS2	0.000174066	FALSE	IP_IN	2.76158	3.27102
1.58562e-05	0.819252	0.073	0.072	0.421885	DS_vs_CTL	PSMD8	0.000174486	TRUE	IP_IN	0.27777	0.485349
1.59043e-05	-0.602188	0.098	0.207	0.423166	DS_vs_CTL	TMEM165	0.000174765	TRUE	IP_IN	1.05474	0.689212
1.59776e-05	-0.958638	0.085	0.215	0.425117	DS_vs_CTL	RPS21	0.00017532	TRUE	IP_IN	0.902893	0.458866
1.60648e-05	-0.650599	0.537	0.713	0.427436	DS_vs_CTL	ANKRD36C	0.00017564	TRUE	IP_IN	6.12017	3.89303
1.60683e-05	0.865806	0.061	0.059	0.427529	DS_vs_CTL	SPTBN2	0.00017564	TRUE	IP_IN	0.22184	0.399542
1.60938e-05	-0.32764	0.384	0.554	0.428207	DS_vs_CTL	HNRNPR	0.00017564	TRUE	IP_IN	3.67513	2.92299
1.60984e-05	-0.169853	0.427	0.58	0.428331	DS_vs_CTL	TNRC6B	0.00017564	FALSE	IP_IN	4.30482	3.82127
1.63939e-05	0.348313	0.299	0.325	0.436192	DS_vs_CTL	TULP4	0.00017861	TRUE	IP_IN	1.7224	2.18759
1.64546e-05	-0.350671	0.646	0.812	0.437808	DS_vs_CTL	DIAPH3	0.000179017	TRUE	IP_IN	8.96482	7.02488
1.67157e-05	-0.246425	0.134	0.232	0.444754	DS_vs_CTL	AC005670.3	0.000181599	FALSE	IP_IN	1.12173	0.940133
1.68608e-05	-0.0393768	0.055	0.108	0.448616	DS_vs_CTL	NMU	0.000182684	FALSE	IP_IN	0.546819	0.526729
1.68631e-05	-0.133026	0.378	0.52	0.448678	DS_vs_CTL	ST8SIA5	0.000182684	FALSE	IP_IN	3.83852	3.49499
1.69597e-05	-0.797374	0.171	0.333	0.451246	DS_vs_CTL	ANKRD28	0.000183471	TRUE	IP_IN	1.88924	1.0814
1.70117e-05	0.320365	0.293	0.324	0.452629	DS_vs_CTL	RAPGEF6	0.000183774	TRUE	IP_IN	1.78228	2.22027
1.72542e-05	-0.598769	0.055	0.131	0.459082	DS_vs_CTL	PRPF38B	0.000185916	TRUE	IP_IN	0.581735	0.378528
1.727e-05	0.87078	0.171	0.131	0.459502	DS_vs_CTL	YWHAB	0.000185916	TRUE	IP_IN	0.564396	1.02736
1.72827e-05	0.281942	0.494	0.531	0.45984	DS_vs_CTL	RALGAPA2	0.000185916	TRUE	IP_IN	3.53456	4.29224
1.73883e-05	2.82405	0.073	0.02	0.46265	DS_vs_CTL	GNAL	0.000186784	TRUE	IP_IN	0.0714213	0.504988
1.7412e-05	-0.929823	0.11	0.248	0.463282	DS_vs_CTL	MYEF2	0.000186784	TRUE	IP_IN	1.185	0.616328
1.75477e-05	0.675144	0.244	0.217	0.466891	DS_vs_CTL	TRIM36	0.000187534	TRUE	IP_IN	1.04948	1.67086
1.75527e-05	-0.531452	0.232	0.388	0.467026	DS_vs_CTL	RPS12	0.000187534	TRUE	IP_IN	1.93748	1.33489
1.75553e-05	0.657919	0.409	0.381	0.467095	DS_vs_CTL	SYT1	0.000187534	TRUE	IP_IN	2.34647	3.69735
1.75966e-05	0.957002	0.244	0.176	0.468191	DS_vs_CTL	PDE9A	0.000187713	TRUE	IP_IN	0.864842	1.67425
1.77919e-05	-0.567905	0.244	0.417	0.473388	DS_vs_CTL	AFAP1	0.000189533	TRUE	IP_IN	2.67137	1.79651
1.79831e-05	0.779416	0.183	0.204	0.478476	DS_vs_CTL	MIAT	0.000191304	TRUE	IP_IN	0.71802	1.22763
1.80923e-05	0.264693	0.189	0.226	0.481383	DS_vs_CTL	SUB1	0.000191926	TRUE	IP_IN	1.17625	1.40793
1.81072e-05	0.657846	0.195	0.183	0.481779	DS_vs_CTL	MFF	0.000191926	TRUE	IP_IN	0.87728	1.37919
1.81166e-05	0.707269	0.329	0.262	0.48203	DS_vs_CTL	PCNT	0.000191926	TRUE	IP_IN	1.39902	2.27932
1.8523e-05	-0.521101	0.268	0.438	0.492842	DS_vs_CTL	CENPF	0.000195961	TRUE	IP_IN	3.03411	2.10871
1.85843e-05	0.32444	0.567	0.586	0.494473	DS_vs_CTL	TMEM161B-AS1	0.000196119	TRUE	IP_IN	4.35354	5.44626
1.86114e-05	0.312571	0.384	0.396	0.495193	DS_vs_CTL	SRGAP2	0.000196119	TRUE	IP_IN	2.28469	2.83223
1.86146e-05	-0.102791	0.159	0.238	0.49528	DS_vs_CTL	BANP	0.000196119	FALSE	IP_IN	1.15942	1.07429
1.87614e-05	-0.165657	0.213	0.322	0.499184	DS_vs_CTL	HNRNPA1	0.00019728	FALSE	IP_IN	1.56009	1.38542
1.878e-05	-1.76387	0.037	0.148	0.499679	DS_vs_CTL	MESD	0.00019728	TRUE	IP_IN	0.735278	0.210632
1.8802e-05	-0.367307	0.561	0.739	0.500265	DS_vs_CTL	RRM2	0.00019728	TRUE	IP_IN	7.30454	5.65717
1.89495e-05	1.86318	0.067	0.035	0.50419	DS_vs_CTL	MMP24OS	0.000198461	TRUE	IP_IN	0.134752	0.486873
1.89663e-05	0.387138	0.274	0.291	0.504637	DS_vs_CTL	CHD3	0.000198461	TRUE	IP_IN	1.33476	1.74048
1.9061e-05	-0.448638	0.494	0.679	0.507155	DS_vs_CTL	KIAA1328	0.000199179	TRUE	IP_IN	6.28699	4.60115
1.91593e-05	-0.254529	0.152	0.265	0.509772	DS_vs_CTL	UBB	0.000199935	TRUE	IP_IN	1.23853	1.03274
1.91965e-05	1.65539	0.128	0.084	0.510762	DS_vs_CTL	KIF26B	0.000200051	TRUE	IP_IN	0.344513	1.08151
1.93685e-05	-0.716494	0.195	0.354	0.515338	DS_vs_CTL	RPL18	0.000201569	TRUE	IP_IN	1.9019	1.1518
1.94129e-05	-0.429783	0.091	0.176	0.51652	DS_vs_CTL	MAPK1IP1L	0.000201758	TRUE	IP_IN	0.799716	0.588148
1.94887e-05	-0.773493	0.177	0.336	0.518537	DS_vs_CTL	CIP2A	0.000202067	TRUE	IP_IN	1.90939	1.11133
1.95028e-05	0.406429	0.195	0.208	0.518911	DS_vs_CTL	ENC1	0.000202067	TRUE	IP_IN	0.93741	1.23734
1.95217e-05	-1.71904	0.037	0.148	0.519415	DS_vs_CTL	KCND3	0.000202067	TRUE	IP_IN	0.937629	0.278937
1.95573e-05	0.129523	0.232	0.288	0.520361	DS_vs_CTL	WDR33	0.000202162	FALSE	IP_IN	1.4893	1.62392
1.96904e-05	-0.171175	0.128	0.2	0.523903	DS_vs_CTL	CERS5	0.000203223	FALSE	IP_IN	0.937718	0.827374
1.97312e-05	0.851197	0.134	0.118	0.524987	DS_vs_CTL	NBAT1	0.000203223	TRUE	IP_IN	0.497905	0.893476
1.97394e-05	1.77907	0.085	0.043	0.525206	DS_vs_CTL	RNF44	0.000203223	TRUE	IP_IN	0.124426	0.423515
1.97835e-05	1.04673	0.213	0.15	0.52638	DS_vs_CTL	DOP1B	0.000203252	TRUE	IP_IN	0.789636	1.62672
1.98136e-05	0.552459	0.207	0.206	0.527181	DS_vs_CTL	LMNA	0.000203252	TRUE	IP_IN	1.04835	1.53249
1.98218e-05	-0.379135	0.421	0.594	0.527397	DS_vs_CTL	SRSF11	0.000203252	TRUE	IP_IN	3.87615	2.97484
2.01373e-05	-0.477854	0.189	0.33	0.535793	DS_vs_CTL	RAD51AP1	0.000205947	TRUE	IP_IN	1.863	1.33216
2.01383e-05	0.0958199	0.146	0.194	0.535819	DS_vs_CTL	ZNF302	0.000205947	FALSE	IP_IN	0.868601	0.922955
2.03828e-05	0.123681	0.427	0.518	0.542324	DS_vs_CTL	USP34	0.00020817	FALSE	IP_IN	3.26454	3.55147
2.04968e-05	0.699569	0.232	0.2	0.545358	DS_vs_CTL	CRYZL1	0.000209056	TRUE	IP_IN	1.00811	1.63232
2.06186e-05	-0.534171	0.195	0.345	0.5486	DS_vs_CTL	NTN4	0.00021002	TRUE	IP_IN	2.18894	1.506
2.08503e-05	3.41162	0.061	0.01	0.554764	DS_vs_CTL	IFI27	0.000212098	TRUE	IP_IN	0.0301301	0.322518
2.08876e-05	-0.14693	0.067	0.123	0.555756	DS_vs_CTL	POU6F1	0.000212196	FALSE	IP_IN	0.578174	0.51677
2.09173e-05	1.15578	0.244	0.132	0.556546	DS_vs_CTL	GULP1	0.000212216	TRUE	IP_IN	0.679373	1.50925
2.09886e-05	-1.19859	0.079	0.213	0.558443	DS_vs_CTL	AL359649.1	0.000212658	TRUE	IP_IN	1.14282	0.492158
2.10411e-05	0.233564	0.079	0.116	0.55984	DS_vs_CTL	MFSD4B	0.000212893	FALSE	IP_IN	0.553268	0.645282
2.10672e-05	3.16603	0.061	0.014	0.560536	DS_vs_CTL	FAM135B	0.000212893	TRUE	IP_IN	0.059927	0.538528
2.10957e-05	0.66953	0.079	0.092	0.561294	DS_vs_CTL	GPC1	0.0002129	TRUE	IP_IN	0.25222	0.396266
2.13865e-05	-0.154071	0.409	0.552	0.56903	DS_vs_CTL	SECISBP2	0.000215551	FALSE	IP_IN	3.5111	3.15004
2.14843e-05	-0.424406	0.433	0.618	0.571633	DS_vs_CTL	ZHX2	0.000216253	TRUE	IP_IN	5.2813	3.9298
2.15382e-05	0.301837	0.183	0.215	0.573066	DS_vs_CTL	IMMT	0.000216511	TRUE	IP_IN	1.06714	1.3103
2.16683e-05	1.33265	0.14	0.098	0.576528	DS_vs_CTL	DOCK9	0.000217534	TRUE	IP_IN	0.39934	1.00159
2.1724e-05	0.101251	0.238	0.303	0.578012	DS_vs_CTL	RTTN	0.000217808	FALSE	IP_IN	1.69574	1.81373
2.18744e-05	0.508872	0.03	0.06	0.582011	DS_vs_CTL	ISYNA1	0.000218892	TRUE	IP_IN	0.127528	0.176435
2.18892e-05	0.182114	0.195	0.248	0.582406	DS_vs_CTL	SLC36A4	0.000218892	FALSE	IP_IN	1.33726	1.51194
2.19912e-05	0.0952823	0.457	0.544	0.58512	DS_vs_CTL	MYCBP2	0.000219626	FALSE	IP_IN	3.51655	3.75135
2.20332e-05	-0.331383	0.256	0.397	0.586238	DS_vs_CTL	UBR3	0.000219759	TRUE	IP_IN	2.19496	1.739
2.22798e-05	0.893206	0.165	0.136	0.592799	DS_vs_CTL	SUMF2	0.00022193	TRUE	IP_IN	0.654332	1.21059
2.2389e-05	1.19538	0.14	0.1	0.595704	DS_vs_CTL	PLCE1	0.000222728	TRUE	IP_IN	0.464619	1.05963
2.2633e-05	-0.217882	0.28	0.417	0.602197	DS_vs_CTL	LRCH1	0.000224865	FALSE	IP_IN	2.63213	2.25773
2.28939e-05	0.8106	0.085	0.074	0.609139	DS_vs_CTL	ZSCAN9	0.000227162	TRUE	IP_IN	0.300818	0.522836
2.30334e-05	2.13158	0.091	0.029	0.612848	DS_vs_CTL	KLF3	0.00022825	TRUE	IP_IN	0.105428	0.459173
2.31534e-05	0.137863	0.134	0.182	0.616041	DS_vs_CTL	UBE2N	0.000229143	FALSE	IP_IN	0.884734	0.968179
2.33369e-05	-0.605567	0.079	0.172	0.620926	DS_vs_CTL	AC005562.1	0.000230663	TRUE	IP_IN	0.818756	0.532493
2.35255e-05	0.880708	0.183	0.134	0.625943	DS_vs_CTL	CDC45	0.000232227	TRUE	IP_IN	0.656719	1.20449
2.35585e-05	-0.23301	0.226	0.345	0.626822	DS_vs_CTL	KITLG	0.000232255	FALSE	IP_IN	2.01063	1.7053
2.36505e-05	0.0298009	0.36	0.449	0.629269	DS_vs_CTL	POLQ	0.000232862	FALSE	IP_IN	2.96287	3.01938
2.3733e-05	-0.162053	0.439	0.592	0.631464	DS_vs_CTL	EFCAB2	0.000232937	FALSE	IP_IN	5.01285	4.47482
2.3738e-05	-0.444738	0.476	0.66	0.631596	DS_vs_CTL	MIR924HG	0.000232937	TRUE	IP_IN	9.67104	7.09994
2.3777e-05	0.862031	0.317	0.232	0.632635	DS_vs_CTL	NAV1	0.000232937	TRUE	IP_IN	1.36795	2.48164
2.37796e-05	-1.50215	0.055	0.178	0.632705	DS_vs_CTL	TMEM168	0.000232937	TRUE	IP_IN	0.850319	0.294353
2.40274e-05	-0.159839	0.189	0.288	0.639297	DS_vs_CTL	EEF1G	0.000235064	FALSE	IP_IN	1.32297	1.17879
2.40585e-05	-0.866952	0.171	0.334	0.640125	DS_vs_CTL	RPL37A	0.000235069	TRUE	IP_IN	1.69136	0.921692
2.41528e-05	-0.222503	0.238	0.358	0.642632	DS_vs_CTL	MB21D2	0.000235636	FALSE	IP_IN	2.40706	2.05758
2.42161e-05	0.337289	0.287	0.312	0.644316	DS_vs_CTL	DOCK11	0.000235636	TRUE	IP_IN	1.72576	2.17514
2.42342e-05	-0.56142	0.073	0.154	0.644799	DS_vs_CTL	HADHA	0.000235636	TRUE	IP_IN	0.709946	0.475495
2.42477e-05	0.186025	0.085	0.125	0.645158	DS_vs_CTL	CACHD1	0.000235636	FALSE	IP_IN	0.574652	0.648495
2.43084e-05	-0.264937	0.189	0.297	0.646774	DS_vs_CTL	SMG1	0.000235636	TRUE	IP_IN	1.47964	1.22593
2.4309e-05	-0.00495866	0.085	0.128	0.646789	DS_vs_CTL	TARDBP	0.000235636	FALSE	IP_IN	0.519849	0.512716
2.43316e-05	0.635683	0.323	0.287	0.647391	DS_vs_CTL	LINC01619	0.000235636	TRUE	IP_IN	1.83913	2.85248
2.45042e-05	-0.372858	0.201	0.327	0.651982	DS_vs_CTL	DMTF1	0.000237007	TRUE	IP_IN	1.63068	1.25378
2.46715e-05	2.58371	0.055	0.02	0.656435	DS_vs_CTL	TMEM163	0.000238326	TRUE	IP_IN	0.0561741	0.335156
2.48321e-05	-0.26588	0.061	0.122	0.660708	DS_vs_CTL	TMEM94	0.000239409	TRUE	IP_IN	0.540312	0.4439
2.48461e-05	2.5753	0.079	0.029	0.66108	DS_vs_CTL	SGCZ	0.000239409	TRUE	IP_IN	0.096496	0.573487
2.49133e-05	-0.367782	0.262	0.405	0.662869	DS_vs_CTL	SUZ12	0.000239522	TRUE	IP_IN	2.2864	1.76638
2.49203e-05	-0.256998	0.262	0.389	0.663053	DS_vs_CTL	ANKRD10	0.000239522	TRUE	IP_IN	2.00353	1.67114
2.49801e-05	0.185247	0.299	0.357	0.664645	DS_vs_CTL	AGTPBP1	0.000239659	FALSE	IP_IN	2.14456	2.43315
2.50364e-05	-2.24511	0.018	0.113	0.666144	DS_vs_CTL	LINC02762	0.000239659	TRUE	IP_IN	0.545809	0.109192
2.50408e-05	-0.537544	0.305	0.48	0.66626	DS_vs_CTL	ELAVL4	0.000239659	TRUE	IP_IN	3.33438	2.29162
2.50595e-05	-1.71067	0.055	0.182	0.666758	DS_vs_CTL	AK9	0.000239659	TRUE	IP_IN	0.960591	0.28761
2.52272e-05	-0.417763	0.11	0.208	0.671221	DS_vs_CTL	PBK	0.000240963	TRUE	IP_IN	1.03642	0.770309
2.54102e-05	0.546948	0.451	0.419	0.676089	DS_vs_CTL	ARX	0.000242408	TRUE	IP_IN	2.99465	4.37017
2.5495e-05	0.856058	0.116	0.104	0.678344	DS_vs_CTL	STK25	0.000242915	TRUE	IP_IN	0.401746	0.722457
2.55879e-05	1.1834	0.061	0.048	0.680817	DS_vs_CTL	ADSL	0.000243498	TRUE	IP_IN	0.182399	0.409857
2.56976e-05	0.504835	0.366	0.337	0.683736	DS_vs_CTL	SPIRE1	0.000244238	TRUE	IP_IN	1.89857	2.68896
2.58268e-05	0.150889	0.116	0.158	0.687174	DS_vs_CTL	LARP4	0.000245163	FALSE	IP_IN	0.741989	0.818532
2.6003e-05	-0.281196	0.39	0.55	0.691863	DS_vs_CTL	NUSAP1	0.00024647	TRUE	IP_IN	3.88335	3.19016
2.60288e-05	-1.45494	0.085	0.227	0.692548	DS_vs_CTL	HIF1A	0.00024647	TRUE	IP_IN	1.26472	0.45551
2.62069e-05	-1.20447	0.073	0.2	0.697288	DS_vs_CTL	VPS13A	0.000247851	TRUE	IP_IN	0.983528	0.42101
2.62512e-05	0.771589	0.073	0.073	0.698466	DS_vs_CTL	NAPB	0.000247964	TRUE	IP_IN	0.310098	0.524567
2.66531e-05	1.11075	0.268	0.168	0.709159	DS_vs_CTL	PITPNC1	0.00025145	TRUE	IP_IN	0.875801	1.88688
2.68815e-05	0.718478	0.348	0.263	0.715236	DS_vs_CTL	KLHL22	0.000253294	TRUE	IP_IN	1.46026	2.39791
2.71574e-05	0.216877	0.262	0.299	0.722577	DS_vs_CTL	PHYKPL	0.000255579	FALSE	IP_IN	1.56577	1.81453
2.71977e-05	0.907646	0.213	0.149	0.723649	DS_vs_CTL	VPS26C	0.000255645	TRUE	IP_IN	0.745394	1.39366
2.73132e-05	1.07045	0.055	0.043	0.726722	DS_vs_CTL	CTC1	0.000256416	TRUE	IP_IN	0.171288	0.355197
2.74852e-05	-0.249883	0.25	0.378	0.731298	DS_vs_CTL	CPLANE1	0.000257716	FALSE	IP_IN	2.1268	1.7831
2.75311e-05	0.491624	0.274	0.27	0.732519	DS_vs_CTL	SPTAN1	0.000257831	TRUE	IP_IN	1.13988	1.59766
2.77857e-05	-0.195945	0.226	0.34	0.739295	DS_vs_CTL	RPS7	0.000259898	FALSE	IP_IN	1.68417	1.46484
2.78964e-05	0.590053	0.128	0.128	0.74224	DS_vs_CTL	PRXL2A	0.000260616	TRUE	IP_IN	0.547328	0.818926
2.79928e-05	0.133976	0.134	0.182	0.744805	DS_vs_CTL	MAPK6	0.000261198	FALSE	IP_IN	0.847399	0.924589
2.81008e-05	0.565177	0.213	0.218	0.747677	DS_vs_CTL	RPL12	0.000261692	TRUE	IP_IN	0.905493	1.33475
2.8114e-05	0.107052	0.244	0.306	0.748029	DS_vs_CTL	TCF25	0.000261692	FALSE	IP_IN	1.53405	1.64693
2.82031e-05	0.143235	0.372	0.445	0.750399	DS_vs_CTL	HECTD4	0.000262203	FALSE	IP_IN	2.61999	2.8882
2.82437e-05	0.429758	0.195	0.204	0.751481	DS_vs_CTL	TRIOBP	0.000262263	TRUE	IP_IN	0.937498	1.25773
2.83515e-05	-0.21571	0.122	0.206	0.754349	DS_vs_CTL	SKP1	0.00026282	FALSE	IP_IN	0.985832	0.84347
2.83838e-05	0.178156	0.091	0.13	0.755207	DS_vs_CTL	SMIM14	0.00026282	FALSE	IP_IN	0.649895	0.730067
2.84065e-05	-0.171788	0.262	0.387	0.755812	DS_vs_CTL	PWWP3A	0.00026282	FALSE	IP_IN	2.15139	1.90445
2.84788e-05	0.653436	0.256	0.261	0.757735	DS_vs_CTL	PLCB1	0.000263171	TRUE	IP_IN	1.67704	2.63292
2.8543e-05	0.288668	0.293	0.331	0.759443	DS_vs_CTL	SORBS1	0.000263447	TRUE	IP_IN	1.81555	2.21254
2.8861e-05	1.13402	0.232	0.135	0.767905	DS_vs_CTL	TBC1D1	0.000266062	TRUE	IP_IN	0.70859	1.55069
2.9029e-05	1.73578	0.098	0.047	0.772375	DS_vs_CTL	EFNB2	0.00026729	TRUE	IP_IN	0.197695	0.654846
2.91041e-05	1.57561	0.073	0.041	0.774372	DS_vs_CTL	PREX1	0.000267525	TRUE	IP_IN	0.147977	0.437201
2.91319e-05	-0.323231	0.122	0.206	0.775112	DS_vs_CTL	MCMBP	0.000267525	TRUE	IP_IN	1.00146	0.794944
2.91592e-05	0.149618	0.134	0.188	0.775838	DS_vs_CTL	PCNX2	0.000267525	FALSE	IP_IN	0.936701	1.0338
2.9256e-05	1.46206	0.061	0.037	0.778414	DS_vs_CTL	INPP5E	0.000268092	TRUE	IP_IN	0.124567	0.339154
2.93241e-05	-0.26811	0.268	0.399	0.780226	DS_vs_CTL	TMEFF1	0.000268396	TRUE	IP_IN	2.4066	1.99298
2.96011e-05	-0.383811	0.098	0.188	0.787595	DS_vs_CTL	KREMEN1	0.000270608	TRUE	IP_IN	0.95296	0.724836
2.98352e-05	-0.529893	0.165	0.298	0.793824	DS_vs_CTL	RPS16	0.000272423	TRUE	IP_IN	1.46915	1.01196
3.03099e-05	-0.328269	0.354	0.514	0.806454	DS_vs_CTL	POLA1	0.00027636	TRUE	IP_IN	3.785	3.00922
3.03383e-05	3.17481	0.055	0.013	0.807211	DS_vs_CTL	CCDC85A	0.00027636	TRUE	IP_IN	0.0334175	0.302461
3.06743e-05	-0.269368	0.159	0.252	0.816152	DS_vs_CTL	NFATC2IP	0.000279089	TRUE	IP_IN	1.24145	1.02454
3.08106e-05	-0.480765	0.39	0.571	0.819777	DS_vs_CTL	SP3	0.000279997	TRUE	IP_IN	3.98332	2.84888
3.10954e-05	-0.530589	0.104	0.203	0.827356	DS_vs_CTL	TRIR	0.000282251	TRUE	IP_IN	0.968051	0.664577
3.13723e-05	0.255589	0.421	0.444	0.834722	DS_vs_CTL	BRWD1	0.00028425	TRUE	IP_IN	2.68916	3.20518
3.13898e-05	0.88949	0.085	0.073	0.835188	DS_vs_CTL	ZBTB4	0.00028425	TRUE	IP_IN	0.302386	0.55547
3.14841e-05	0.560766	0.11	0.119	0.837698	DS_vs_CTL	TACC1	0.000284768	TRUE	IP_IN	0.541213	0.793327
3.17776e-05	0.0268498	0.134	0.191	0.845506	DS_vs_CTL	CAPN7	0.000286967	FALSE	IP_IN	0.965812	0.978622
3.1802e-05	-0.318676	0.591	0.757	0.846156	DS_vs_CTL	CDKAL1	0.000286967	TRUE	IP_IN	7.44101	5.96075
3.18996e-05	0.202422	0.104	0.14	0.848753	DS_vs_CTL	PSAP	0.000287509	FALSE	IP_IN	0.545096	0.62197
3.19571e-05	-1.00708	0.067	0.175	0.850283	DS_vs_CTL	LINC01563	0.000287689	TRUE	IP_IN	0.864504	0.424412
3.23251e-05	-0.145448	0.213	0.315	0.860075	DS_vs_CTL	RTKN2	0.000290214	FALSE	IP_IN	1.81742	1.63771
3.23417e-05	-0.517865	0.293	0.462	0.860517	DS_vs_CTL	ZNF644	0.000290214	TRUE	IP_IN	2.88634	2.01026
3.23511e-05	0.191837	0.299	0.358	0.860767	DS_vs_CTL	NACA	0.000290214	FALSE	IP_IN	1.78949	2.03875
3.24112e-05	-0.293693	0.402	0.564	0.862364	DS_vs_CTL	COP1	0.000290413	TRUE	IP_IN	3.92123	3.1935
3.27416e-05	-0.195543	0.427	0.573	0.871156	DS_vs_CTL	TNKS	0.000292772	FALSE	IP_IN	4.02526	3.50959
3.27508e-05	0.212402	0.195	0.23	0.8714	DS_vs_CTL	SAFB	0.000292772	FALSE	IP_IN	1.16582	1.34551
3.28022e-05	-0.749035	0.085	0.194	0.872769	DS_vs_CTL	COL9A1	0.000292891	TRUE	IP_IN	1.00184	0.590447
3.30389e-05	-0.00160478	0.415	0.521	0.879066	DS_vs_CTL	MYH10	0.000294661	FALSE	IP_IN	3.38046	3.37135
3.31699e-05	0.250432	0.476	0.505	0.882551	DS_vs_CTL	FYN	0.000295486	TRUE	IP_IN	3.08577	3.66551
3.33245e-05	1.16232	0.134	0.085	0.886665	DS_vs_CTL	IPPK	0.000296518	TRUE	IP_IN	0.381484	0.849409
3.34262e-05	0.058263	0.287	0.368	0.88937	DS_vs_CTL	MORF4L1	0.000297079	FALSE	IP_IN	1.96015	2.03562
3.34737e-05	2.42159	0.073	0.024	0.890636	DS_vs_CTL	DKK3	0.000297157	TRUE	IP_IN	0.0879264	0.468999
3.36543e-05	-0.191343	0.232	0.336	0.895439	DS_vs_CTL	FAR1	0.000298414	FALSE	IP_IN	1.78382	1.55681
3.40206e-05	3.40562	0.055	0.009	0.905187	DS_vs_CTL	NCALD	0.000301314	TRUE	IP_IN	0.0282761	0.301508
3.44945e-05	0.098915	0.165	0.218	0.917795	DS_vs_CTL	SMS	0.000305159	FALSE	IP_IN	1.07441	1.14536
3.4676e-05	1.88301	0.079	0.038	0.922623	DS_vs_CTL	TRIM66	0.000306411	TRUE	IP_IN	0.1541	0.565063
3.50087e-05	0.434041	0.232	0.239	0.931476	DS_vs_CTL	GDI2	0.000308995	TRUE	IP_IN	1.17801	1.58642
3.5456e-05	-0.289808	0.232	0.357	0.943379	DS_vs_CTL	N4BP2	0.000312435	TRUE	IP_IN	2.07906	1.69521
3.55102e-05	-0.317085	0.061	0.124	0.944821	DS_vs_CTL	POM121C	0.000312435	TRUE	IP_IN	0.540355	0.428243
3.55206e-05	0.408283	0.171	0.192	0.945097	DS_vs_CTL	DCTN4	0.000312435	TRUE	IP_IN	0.918823	1.21427
3.58664e-05	0.381602	0.159	0.173	0.954298	DS_vs_CTL	ESR2	0.000315115	TRUE	IP_IN	0.856049	1.11013
3.6005e-05	0.144638	0.354	0.418	0.957985	DS_vs_CTL	CREBBP	0.000315971	FALSE	IP_IN	2.52521	2.78624
3.60916e-05	-0.0944876	0.183	0.267	0.96029	DS_vs_CTL	PRDM2	0.000316369	FALSE	IP_IN	1.41505	1.31994
3.62794e-05	0.622873	0.067	0.075	0.965287	DS_vs_CTL	ADCY6	0.000317652	TRUE	IP_IN	0.299646	0.456494
3.64069e-05	0.750275	0.244	0.197	0.968678	DS_vs_CTL	DOT1L	0.000318404	TRUE	IP_IN	0.906554	1.52009
3.64978e-05	2.5356	0.073	0.021	0.971096	DS_vs_CTL	NEFM	0.000318836	TRUE	IP_IN	0.0713387	0.411889
3.67114e-05	-0.043502	0.482	0.602	0.976781	DS_vs_CTL	MLLT10	0.000320337	FALSE	IP_IN	4.24403	4.1126
3.6806e-05	-1.22814	0.055	0.167	0.979298	DS_vs_CTL	TP53BP2	0.000320675	TRUE	IP_IN	0.812102	0.340882
3.68337e-05	-0.778045	0.134	0.272	0.980034	DS_vs_CTL	KIF22	0.000320675	TRUE	IP_IN	1.35853	0.786576
3.68974e-05	0.294241	0.287	0.316	0.98173	DS_vs_CTL	THUMPD3-AS1	0.000320866	TRUE	IP_IN	1.73035	2.11664
3.69597e-05	-0.0869623	0.335	0.456	0.983388	DS_vs_CTL	PAN3	0.000321043	FALSE	IP_IN	2.8073	2.6377
3.70686e-05	0.69189	0.091	0.102	0.986283	DS_vs_CTL	FLNA	0.000321624	TRUE	IP_IN	0.336714	0.539043
3.74721e-05	0.474664	0.238	0.239	0.997021	DS_vs_CTL	ANKFY1	0.000324758	TRUE	IP_IN	1.16867	1.61892
3.76464e-05	-1.01184	0.091	0.219	1	DS_vs_CTL	CDK1	0.000325798	TRUE	IP_IN	1.10068	0.540117
3.7691e-05	0.0573961	0.201	0.259	1	DS_vs_CTL	CSNK1E	0.000325798	FALSE	IP_IN	1.23752	1.28243
3.77196e-05	1.05656	0.244	0.152	1	DS_vs_CTL	MAP3K13	0.000325798	TRUE	IP_IN	0.863474	1.79146
3.78048e-05	-0.767539	0.195	0.358	1	DS_vs_CTL	URI1	0.000326167	TRUE	IP_IN	2.09026	1.2222
3.79021e-05	-0.173961	0.378	0.517	1	DS_vs_CTL	FNBP4	0.000326639	FALSE	IP_IN	3.23491	2.86201
3.83374e-05	0.604097	0.134	0.135	1	DS_vs_CTL	CHKA	0.000329968	TRUE	IP_IN	0.607809	0.91893
3.83744e-05	0.850823	0.226	0.164	1	DS_vs_CTL	TUBB4B	0.000329968	TRUE	IP_IN	0.723057	1.29931
3.85956e-05	-0.671752	0.189	0.345	1	DS_vs_CTL	BARD1	0.000331498	TRUE	IP_IN	2.01901	1.26179
3.87528e-05	1.06625	0.067	0.056	1	DS_vs_CTL	AC053513.1	0.000332477	TRUE	IP_IN	0.234732	0.487
3.88111e-05	-0.329397	0.134	0.23	1	DS_vs_CTL	RBM5	0.000332604	TRUE	IP_IN	0.988764	0.781426
3.88608e-05	-5.33669	0	0.056	1	DS_vs_CTL	TP53I13	0.000332659	TRUE	IP_IN	0.24566	0
3.92868e-05	-1.02388	0.134	0.287	1	DS_vs_CTL	KAT2B	0.00033593	TRUE	IP_IN	1.66321	0.812228
3.94704e-05	0.0457791	0.28	0.355	1	DS_vs_CTL	SMARCAD1	0.000337125	FALSE	IP_IN	2.0362	2.09652
3.9985e-05	-0.328419	0.171	0.27	1	DS_vs_CTL	ESCO2	0.00034114	TRUE	IP_IN	1.42166	1.12672
4.02979e-05	0.215927	0.53	0.595	1	DS_vs_CTL	BASP1	0.000343428	FALSE	IP_IN	3.84661	4.46242
4.03915e-05	-0.251853	0.366	0.515	1	DS_vs_CTL	CCND2	0.000343844	TRUE	IP_IN	3.7496	3.14351
4.04779e-05	0.781627	0.128	0.113	1	DS_vs_CTL	DONSON	0.000344197	TRUE	IP_IN	0.527867	0.902632
4.06069e-05	-0.363207	0.256	0.394	1	DS_vs_CTL	MYBL1	0.000344912	TRUE	IP_IN	2.33825	1.81232
4.0658e-05	-0.534395	0.067	0.146	1	DS_vs_CTL	CNBP	0.000344963	TRUE	IP_IN	0.639254	0.435792
4.08408e-05	-0.0376408	0.28	0.381	1	DS_vs_CTL	RAPGEF2	0.000345816	FALSE	IP_IN	2.19402	2.13216
4.08486e-05	0.612959	0.085	0.086	1	DS_vs_CTL	PSMC1	0.000345816	TRUE	IP_IN	0.36425	0.552132
4.10161e-05	-0.744624	0.183	0.342	1	DS_vs_CTL	ZNF407	0.000346851	TRUE	IP_IN	2.15881	1.28278
4.10708e-05	0.481727	0.354	0.357	1	DS_vs_CTL	ZEB1	0.000346873	TRUE	IP_IN	2.43624	3.39695
4.11092e-05	0.745548	0.049	0.056	1	DS_vs_CTL	MTRES1	0.000346873	TRUE	IP_IN	0.238187	0.394509
4.12852e-05	-0.510753	0.098	0.194	1	DS_vs_CTL	KPNA1	0.000347975	TRUE	IP_IN	0.950599	0.661613
4.16792e-05	0.00907323	0.043	0.077	1	DS_vs_CTL	PNRC2	0.00035091	FALSE	IP_IN	0.311727	0.308351
4.19615e-05	-0.241331	0.201	0.305	1	DS_vs_CTL	CAPRIN1	0.0003529	FALSE	IP_IN	1.56298	1.31676
4.20422e-05	-0.0251794	0.409	0.511	1	DS_vs_CTL	CEP170	0.000353191	FALSE	IP_IN	3.20338	3.1426
4.24504e-05	0.583305	0.183	0.183	1	DS_vs_CTL	HSPA8	0.000356224	TRUE	IP_IN	0.790483	1.17939
4.25354e-05	-0.454267	0.085	0.163	1	DS_vs_CTL	ATF6B	0.000356224	TRUE	IP_IN	0.695147	0.501825
4.25426e-05	0.326656	0.091	0.117	1	DS_vs_CTL	ARPC5	0.000356224	TRUE	IP_IN	0.510257	0.634759
4.27941e-05	-0.20428	0.134	0.219	1	DS_vs_CTL	CEP97	0.00035794	FALSE	IP_IN	1.05822	0.91306
4.28594e-05	-0.934989	0.171	0.334	1	DS_vs_CTL	ATP8A1	0.000358095	TRUE	IP_IN	1.97997	1.02991
4.30457e-05	-0.0193319	0.463	0.595	1	DS_vs_CTL	SPAG9	0.00035926	FALSE	IP_IN	4.04201	3.98285
4.32232e-05	-0.77328	0.091	0.203	1	DS_vs_CTL	BRD8	0.00036035	TRUE	IP_IN	0.979608	0.567496
4.33891e-05	-0.105845	0.091	0.145	1	DS_vs_CTL	PPIL4	0.00036134	FALSE	IP_IN	0.671444	0.618546
4.35572e-05	0.951027	0.073	0.067	1	DS_vs_CTL	PNMA1	0.000362347	TRUE	IP_IN	0.22477	0.429889
4.37482e-05	0.393093	0.067	0.08	1	DS_vs_CTL	MORC4	0.000363542	TRUE	IP_IN	0.354125	0.459928
4.39703e-05	0.782666	0.116	0.098	1	DS_vs_CTL	ZNF93	0.000364992	TRUE	IP_IN	0.449256	0.768052
4.41626e-05	0.340875	0.348	0.371	1	DS_vs_CTL	ARFGEF1	0.000366192	TRUE	IP_IN	2.08152	2.63115
4.42353e-05	-0.20404	0.067	0.123	1	DS_vs_CTL	TBPL1	0.000366398	FALSE	IP_IN	0.590763	0.507405
4.43129e-05	-0.261071	0.567	0.729	1	DS_vs_CTL	PTBP2	0.000366645	TRUE	IP_IN	6.14171	5.11959
4.43788e-05	0.814635	0.171	0.136	1	DS_vs_CTL	DBF4B	0.000366794	TRUE	IP_IN	0.655667	1.14844
4.46539e-05	-1.49949	0.061	0.184	1	DS_vs_CTL	R3HCC1L	0.000368645	TRUE	IP_IN	0.963479	0.33493
4.46988e-05	-1.7254	0.061	0.186	1	DS_vs_CTL	AC012368.1	0.000368645	TRUE	IP_IN	0.960465	0.284588
4.47763e-05	0.631966	0.238	0.208	1	DS_vs_CTL	AC011043.1	0.000368888	TRUE	IP_IN	0.998683	1.5427
4.48971e-05	-0.0838844	0.238	0.345	1	DS_vs_CTL	RPL29	0.000369486	FALSE	IP_IN	1.76847	1.66319
4.49795e-05	0.21213	0.305	0.348	1	DS_vs_CTL	PPP2R5C	0.000369637	FALSE	IP_IN	1.98139	2.29001
4.50119e-05	-1.30182	0.073	0.2	1	DS_vs_CTL	AP002989.1	0.000369637	TRUE	IP_IN	1.35938	0.54559
4.5072e-05	0.610057	0.488	0.328	1	DS_vs_CTL	FAM155A	0.000369735	TRUE	IP_IN	2.70847	4.12904
4.55506e-05	-0.192789	0.073	0.134	1	DS_vs_CTL	RPL27A	0.000373262	FALSE	IP_IN	0.58267	0.504345
4.57485e-05	0.368018	0.122	0.137	1	DS_vs_CTL	IST1	0.000374483	TRUE	IP_IN	0.600149	0.769411
4.59628e-05	0.367519	0.348	0.356	1	DS_vs_CTL	ST8SIA2	0.000375836	TRUE	IP_IN	1.99793	2.57247
4.61163e-05	-0.654602	0.146	0.281	1	DS_vs_CTL	RSRC2	0.000376501	TRUE	IP_IN	1.42623	0.900394
4.61662e-05	0.887116	0.402	0.255	1	DS_vs_CTL	MAML3	0.000376501	TRUE	IP_IN	2.44833	4.52343
4.61913e-05	0.272095	0.116	0.145	1	DS_vs_CTL	VPS26A	0.000376501	TRUE	IP_IN	0.661398	0.793487
4.62788e-05	-0.035829	0.238	0.318	1	DS_vs_CTL	XRN1	0.000376813	FALSE	IP_IN	1.75706	1.7086
4.67109e-05	-0.316173	0.598	0.762	1	DS_vs_CTL	EZH2	0.000379928	TRUE	IP_IN	7.00181	5.61834
4.712e-05	-2.28841	0.024	0.125	1	DS_vs_CTL	EPHA5-AS1	0.00038285	TRUE	IP_IN	0.649473	0.127004
4.7332e-05	-0.721999	0.134	0.266	1	DS_vs_CTL	IFT88	0.000384166	TRUE	IP_IN	1.44058	0.867719
4.74439e-05	0.793066	0.171	0.146	1	DS_vs_CTL	CDCA7L	0.000384667	TRUE	IP_IN	0.70274	1.21288
4.77046e-05	-0.680491	0.195	0.348	1	DS_vs_CTL	2024-03-07	0.000386372	TRUE	IP_IN	1.88902	1.17303
4.79628e-05	0.558314	0.329	0.303	1	DS_vs_CTL	PKIA	0.000388053	TRUE	IP_IN	1.70446	2.5049
4.80151e-05	0.274506	0.085	0.111	1	DS_vs_CTL	CDC123	0.000388067	TRUE	IP_IN	0.480415	0.57591
4.82443e-05	0.578557	0.116	0.123	1	DS_vs_CTL	MRPL42	0.00038951	TRUE	IP_IN	0.56756	0.842592
4.83832e-05	0.590681	0.36	0.315	1	DS_vs_CTL	PRMT2	0.00039022	TRUE	IP_IN	1.6452	2.47263
4.85076e-05	2.14582	0.061	0.026	1	DS_vs_CTL	COL4A1	0.000390813	TRUE	IP_IN	0.0803932	0.352999
4.86191e-05	0.666967	0.189	0.167	1	DS_vs_CTL	TGFBR1	0.000391173	TRUE	IP_IN	0.851513	1.34707
4.86544e-05	0.641681	0.104	0.112	1	DS_vs_CTL	ATP5PF	0.000391173	TRUE	IP_IN	0.461967	0.71581
4.90604e-05	0.577513	0.085	0.095	1	DS_vs_CTL	C18orf25	0.000394024	TRUE	IP_IN	0.413588	0.61221
4.92232e-05	0.324319	0.079	0.101	1	DS_vs_CTL	CRBN	0.000394919	TRUE	IP_IN	0.440858	0.546829
4.96405e-05	-0.187971	0.262	0.373	1	DS_vs_CTL	PPHLN1	0.00039785	FALSE	IP_IN	2.20687	1.93183
4.98425e-05	1.19253	0.098	0.066	1	DS_vs_CTL	AC053527.2	0.000399052	TRUE	IP_IN	0.313967	0.713199
5.01244e-05	0.591914	0.098	0.1	1	DS_vs_CTL	GPATCH2	0.000400891	TRUE	IP_IN	0.46546	0.696596
5.02446e-05	0.228658	0.366	0.422	1	DS_vs_CTL	YWHAE	0.000401433	FALSE	IP_IN	2.30961	2.70105
5.03508e-05	0.1814	0.037	0.065	1	DS_vs_CTL	NUTF2	0.000401863	FALSE	IP_IN	0.255251	0.284204
5.07257e-05	0.146661	0.146	0.203	1	DS_vs_CTL	TJP1	0.000404435	FALSE	IP_IN	1.02232	1.12645
5.08316e-05	-0.299151	0.195	0.301	1	DS_vs_CTL	ZNF66	0.000404858	TRUE	IP_IN	1.60586	1.29964
5.12497e-05	-1.08149	0.037	0.116	1	DS_vs_CTL	DTYMK	0.000407764	TRUE	IP_IN	0.488477	0.225083
5.13899e-05	0.0317303	0.146	0.208	1	DS_vs_CTL	SH3GLB1	0.000408456	FALSE	IP_IN	1.00124	1.01817
5.16744e-05	-0.205475	0.561	0.706	1	DS_vs_CTL	TUT4	0.000410292	FALSE	IP_IN	5.61716	4.86605
5.19444e-05	0.450444	0.11	0.114	1	DS_vs_CTL	ZNF3	0.00041201	TRUE	IP_IN	0.490257	0.664845
5.20361e-05	-0.383391	0.134	0.227	1	DS_vs_CTL	ZNF37A	0.000412311	TRUE	IP_IN	1.15916	0.883125
5.21559e-05	0.60517	0.098	0.095	1	DS_vs_CTL	ANKS3	0.000412741	TRUE	IP_IN	0.404919	0.610991
5.2198e-05	-1.07107	0.073	0.188	1	DS_vs_CTL	NPM1	0.000412741	TRUE	IP_IN	0.859645	0.403421
5.23978e-05	0.385656	0.36	0.371	1	DS_vs_CTL	UBE2D2	0.000413885	TRUE	IP_IN	2.20765	2.87908
5.24507e-05	-0.0490182	0.299	0.401	1	DS_vs_CTL	ARHGEF7	0.000413885	FALSE	IP_IN	2.17828	2.10014
5.28742e-05	0.981005	0.165	0.12	1	DS_vs_CTL	INTU	0.000416581	TRUE	IP_IN	0.533166	1.04777
5.29171e-05	-0.366505	0.177	0.298	1	DS_vs_CTL	TIA1	0.000416581	TRUE	IP_IN	1.2094	0.932565
5.29552e-05	0.0302103	0.037	0.072	1	DS_vs_CTL	FLYWCH1	0.000416581	FALSE	IP_IN	0.299683	0.300693
5.31782e-05	-0.00572198	0.244	0.325	1	DS_vs_CTL	CHD1	0.000417907	FALSE	IP_IN	1.87685	1.86408
5.33055e-05	0.2666	0.256	0.294	1	DS_vs_CTL	KANSL1L	0.000418458	TRUE	IP_IN	1.59434	1.91275
5.33574e-05	-0.112573	0.567	0.706	1	DS_vs_CTL	GAD2	0.000418458	FALSE	IP_IN	6.06174	5.60133
5.34603e-05	-0.467103	0.049	0.109	1	DS_vs_CTL	DZIP1L	0.000418836	TRUE	IP_IN	0.497903	0.354636
5.3755e-05	3.02548	0.055	0.015	1	DS_vs_CTL	PLPPR5	0.000420599	TRUE	IP_IN	0.0414153	0.33724
5.3795e-05	0.285651	0.372	0.407	1	DS_vs_CTL	UBE2K	0.000420599	TRUE	IP_IN	2.42984	2.95669
5.39829e-05	-0.221814	0.091	0.158	1	DS_vs_CTL	RFC4	0.000421638	FALSE	IP_IN	0.696166	0.591499
5.44442e-05	-0.216935	0.476	0.628	1	DS_vs_CTL	TBL1XR1	0.000424809	FALSE	IP_IN	4.74963	4.08109
5.4725e-05	-0.548548	0.329	0.504	1	DS_vs_CTL	CORO1C	0.000426566	TRUE	IP_IN	3.25951	2.22297
5.48691e-05	0.738844	0.165	0.138	1	DS_vs_CTL	NUFIP2	0.000427255	TRUE	IP_IN	0.6234	1.03551
5.49496e-05	0.726695	0.183	0.151	1	DS_vs_CTL	CDCA4	0.000427448	TRUE	IP_IN	0.694766	1.14487
5.54999e-05	-0.464054	0.366	0.536	1	DS_vs_CTL	RNASEH2B	0.000431291	TRUE	IP_IN	3.89858	2.82071
5.55935e-05	0.586499	0.207	0.2	1	DS_vs_CTL	ELAVL2	0.000431581	TRUE	IP_IN	0.961811	1.43928
5.61065e-05	-0.629314	0.134	0.255	1	DS_vs_CTL	AGPAT5	0.000435123	TRUE	IP_IN	1.29483	0.831476
5.62089e-05	-1.46192	0.067	0.193	1	DS_vs_CTL	ADAM17	0.000435477	TRUE	IP_IN	1.00961	0.360672
5.68091e-05	-0.211687	0.049	0.093	1	DS_vs_CTL	ACOX1	0.000439683	FALSE	IP_IN	0.406275	0.34538
5.69491e-05	0.429949	0.787	0.775	1	DS_vs_CTL	ARID1B	0.000440322	TRUE	IP_IN	8.65883	11.66
5.70081e-05	-0.18863	0.159	0.236	1	DS_vs_CTL	RACGAP1	0.000440335	FALSE	IP_IN	1.15071	1.00424
5.74228e-05	-0.0413175	0.159	0.227	1	DS_vs_CTL	NSUN6	0.000443091	FALSE	IP_IN	1.20971	1.17018
5.7497e-05	0.279412	0.293	0.328	1	DS_vs_CTL	FXYD6	0.000443218	TRUE	IP_IN	1.62635	1.96871
5.75617e-05	-0.242849	0.11	0.19	1	DS_vs_CTL	EZR	0.000443272	FALSE	IP_IN	0.896024	0.751744
5.79553e-05	0.50994	0.134	0.137	1	DS_vs_CTL	COMT	0.000445573	TRUE	IP_IN	0.652017	0.923438
5.79767e-05	0.520846	0.36	0.325	1	DS_vs_CTL	NEMF	0.000445573	TRUE	IP_IN	1.72821	2.47461
5.81409e-05	-0.60562	0.024	0.072	1	DS_vs_CTL	IER3IP1	0.000446065	TRUE	IP_IN	0.337336	0.216089
5.81572e-05	-0.196354	0.22	0.327	1	DS_vs_CTL	ZNF280D	0.000446065	FALSE	IP_IN	1.71238	1.48904
5.8377e-05	0.00703964	0.25	0.34	1	DS_vs_CTL	CDC27	0.000447282	FALSE	IP_IN	1.92484	1.92891
5.84324e-05	0.00575367	0.244	0.321	1	DS_vs_CTL	NUMB	0.000447282	FALSE	IP_IN	1.80842	1.8103
5.87037e-05	1.09345	0.128	0.103	1	DS_vs_CTL	CACNA1B	0.000448257	TRUE	IP_IN	0.403361	0.85621
5.87554e-05	0.486863	0.232	0.242	1	DS_vs_CTL	PAK5	0.000448257	TRUE	IP_IN	1.24875	1.74495
5.87759e-05	-0.467986	0.128	0.227	1	DS_vs_CTL	PPP2R2D	0.000448257	TRUE	IP_IN	1.14497	0.822228
5.87935e-05	0.304785	0.707	0.733	1	DS_vs_CTL	NSD3	0.000448257	TRUE	IP_IN	5.92595	7.31477
5.89637e-05	-0.279259	0.311	0.45	1	DS_vs_CTL	MAP4K5	0.000448839	TRUE	IP_IN	2.89751	2.38211
5.90313e-05	0.778147	0.116	0.105	1	DS_vs_CTL	CHSY1	0.000448839	TRUE	IP_IN	0.4755	0.810637
5.90454e-05	0.533498	0.177	0.169	1	DS_vs_CTL	VASH1	0.000448839	TRUE	IP_IN	0.751194	1.08229
5.91613e-05	0.0733976	0.36	0.446	1	DS_vs_CTL	SCAF8	0.000448929	FALSE	IP_IN	2.74869	2.88684
5.91743e-05	-0.0355015	0.256	0.349	1	DS_vs_CTL	CLIP1	0.000448929	FALSE	IP_IN	1.99287	1.93907
5.92485e-05	-0.273863	0.189	0.293	1	DS_vs_CTL	USP9X	0.000449047	TRUE	IP_IN	1.49549	1.23144
5.93261e-05	0.345548	0.226	0.242	1	DS_vs_CTL	EP400	0.000449192	TRUE	IP_IN	1.19876	1.51804
5.9731e-05	-0.376509	0.055	0.116	1	DS_vs_CTL	DHX8	0.000451811	TRUE	IP_IN	0.551126	0.419013
5.98617e-05	0.477327	0.47	0.429	1	DS_vs_CTL	NSD1	0.0004521	TRUE	IP_IN	2.65742	3.69451
5.98871e-05	-0.452707	0.201	0.339	1	DS_vs_CTL	JARID2	0.0004521	TRUE	IP_IN	2.09679	1.52651
6.00605e-05	-0.351851	0.287	0.432	1	DS_vs_CTL	USP49	0.000452964	TRUE	IP_IN	2.64674	2.06842
6.04049e-05	0.68482	0.091	0.089	1	DS_vs_CTL	ZNF250	0.000455114	TRUE	IP_IN	0.37168	0.592585
6.04935e-05	0.907832	0.085	0.096	1	DS_vs_CTL	NRBP2	0.000455334	TRUE	IP_IN	0.309995	0.576932
6.06289e-05	1.1635	0.134	0.092	1	DS_vs_CTL	THSD7A	0.000455905	TRUE	IP_IN	0.398641	0.888543
6.08685e-05	0.548437	0.14	0.139	1	DS_vs_CTL	NAIP	0.000457259	TRUE	IP_IN	0.601286	0.874381
6.11967e-05	-0.196773	0.055	0.106	1	DS_vs_CTL	TRIM28	0.000459275	FALSE	IP_IN	0.382961	0.328691
6.12684e-05	-0.361613	0.256	0.396	1	DS_vs_CTL	HNRNPM	0.000459363	TRUE	IP_IN	2.11238	1.63854
6.19557e-05	0.693581	0.274	0.224	1	DS_vs_CTL	ASXL3	0.000464062	TRUE	IP_IN	1.16664	1.88192
6.23174e-05	-0.277442	0.305	0.439	1	DS_vs_CTL	SUGP2	0.000466316	TRUE	IP_IN	2.57974	2.12294
6.28582e-05	0.156173	0.36	0.408	1	DS_vs_CTL	LUC7L2	0.000469905	FALSE	IP_IN	2.35762	2.62189
6.29606e-05	0.404883	0.177	0.196	1	DS_vs_CTL	CHKB	0.000470212	TRUE	IP_IN	0.881552	1.16206
6.31524e-05	-1.43133	0.14	0.291	1	DS_vs_CTL	DPYD	0.000471186	TRUE	IP_IN	2.28752	0.842371
6.35062e-05	-0.22099	0.232	0.348	1	DS_vs_CTL	CCSER2	0.000473365	FALSE	IP_IN	1.96739	1.68252
6.36969e-05	0.624238	0.091	0.094	1	DS_vs_CTL	PPIB	0.000474326	TRUE	IP_IN	0.404098	0.617935
6.38941e-05	2.09531	0.073	0.031	1	DS_vs_CTL	PDLIM7	0.000475332	TRUE	IP_IN	0.0980191	0.415965
6.40096e-05	0.958943	0.128	0.096	1	DS_vs_CTL	GABPA	0.00047573	TRUE	IP_IN	0.444501	0.85942
6.42081e-05	-1.40626	0.012	0.071	1	DS_vs_CTL	RAE1	0.000476537	TRUE	IP_IN	0.317789	0.114084
6.42423e-05	-0.739329	0.055	0.146	1	DS_vs_CTL	BTF3	0.000476537	TRUE	IP_IN	0.662555	0.391234
6.4472e-05	-0.722766	0.232	0.397	1	DS_vs_CTL	ANKRD36B	0.000477778	TRUE	IP_IN	2.31504	1.39712
6.46781e-05	-5.19762	0	0.053	1	DS_vs_CTL	SLITRK1	0.000478843	TRUE	IP_IN	0.223016	0
6.50649e-05	-0.0855366	0.073	0.131	1	DS_vs_CTL	EIF3M	0.000481242	FALSE	IP_IN	0.573188	0.534802
6.52285e-05	2.34084	0.085	0.026	1	DS_vs_CTL	ZNF804B	0.000481987	TRUE	IP_IN	0.0941706	0.474771
6.56307e-05	1.72435	0.073	0.038	1	DS_vs_CTL	ENTR1	0.000484492	TRUE	IP_IN	0.133722	0.438245
6.58885e-05	-0.568178	0.104	0.206	1	DS_vs_CTL	TAF2	0.000485928	TRUE	IP_IN	1.02241	0.683994
6.62325e-05	-0.0364143	0.372	0.469	1	DS_vs_CTL	ANKRD11	0.000487995	FALSE	IP_IN	3.00367	2.92344
6.63146e-05	0.491107	0.146	0.154	1	DS_vs_CTL	CTIF	0.000488132	TRUE	IP_IN	0.678358	0.948406
6.67922e-05	0.726762	0.165	0.152	1	DS_vs_CTL	RIN2	0.000491175	TRUE	IP_IN	0.793812	1.30884
6.71348e-05	0.353321	0.207	0.23	1	DS_vs_CTL	SNHG29	0.000493222	TRUE	IP_IN	1.05814	1.34664
6.78644e-05	-0.390742	0.299	0.453	1	DS_vs_CTL	ZNF43	0.000498105	TRUE	IP_IN	2.78377	2.11776
6.80864e-05	-0.466381	0.226	0.369	1	DS_vs_CTL	USP9Y	0.000499257	TRUE	IP_IN	2.20213	1.5883
6.85318e-05	2.7377	0.055	0.017	1	DS_vs_CTL	ELMOD1	0.000502043	TRUE	IP_IN	0.0407094	0.270444
6.87128e-05	1.24535	0.11	0.075	1	DS_vs_CTL	EPHB1	0.000502888	TRUE	IP_IN	0.352469	0.831302
6.91547e-05	-0.284676	0.201	0.307	1	DS_vs_CTL	AC017053.1	0.000505254	TRUE	IP_IN	1.77015	1.44768
6.91678e-05	-2.05282	0.049	0.162	1	DS_vs_CTL	LINC00504	0.000505254	TRUE	IP_IN	1.19557	0.282232
6.93589e-05	0.064542	0.079	0.116	1	DS_vs_CTL	SGCB	0.000506168	FALSE	IP_IN	0.508454	0.526405
6.97599e-05	-0.481799	0.402	0.58	1	DS_vs_CTL	EHMT1	0.000508611	TRUE	IP_IN	3.9864	2.84904
7.0023e-05	0.0219584	0.104	0.17	1	DS_vs_CTL	DUT	0.000510044	FALSE	IP_IN	0.807976	0.815033
7.02114e-05	0.148777	0.11	0.16	1	DS_vs_CTL	NDUFA13	0.000510931	FALSE	IP_IN	0.668203	0.735525
7.06291e-05	-0.166932	0.573	0.716	1	DS_vs_CTL	ATRX	0.000513484	FALSE	IP_IN	5.86947	5.22272
7.12284e-05	0.282157	0.159	0.189	1	DS_vs_CTL	CHD8	0.00051735	TRUE	IP_IN	0.949928	1.14994
7.26479e-05	2.69847	0.055	0.019	1	DS_vs_CTL	PAX6	0.000526711	TRUE	IP_IN	0.0577313	0.373517
7.26545e-05	0.414242	0.744	0.751	1	DS_vs_CTL	DCLK1	0.000526711	TRUE	IP_IN	8.10125	10.7906
7.30886e-05	0.88587	0.079	0.073	1	DS_vs_CTL	CACNB3	0.000529357	TRUE	IP_IN	0.249132	0.455655
7.3458e-05	-5.17659	0	0.053	1	DS_vs_CTL	C4orf46	0.000531531	TRUE	IP_IN	0.219778	0
7.37951e-05	0.178603	0.091	0.122	1	DS_vs_CTL	AL391807.1	0.000532975	FALSE	IP_IN	0.445694	0.499183
7.37966e-05	-0.182929	0.311	0.433	1	DS_vs_CTL	ANKHD1	0.000532975	FALSE	IP_IN	2.65842	2.3364
7.38753e-05	-0.3396	0.177	0.286	1	DS_vs_CTL	OIP5-AS1	0.000533042	TRUE	IP_IN	1.46633	1.15327
7.39852e-05	-0.63465	0.25	0.414	1	DS_vs_CTL	ATG10	0.000533333	TRUE	IP_IN	3.11422	2.00024
7.44665e-05	0.351433	0.506	0.51	1	DS_vs_CTL	RNF38	0.000536299	TRUE	IP_IN	3.53785	4.50854
7.48202e-05	-1.34781	0.03	0.114	1	DS_vs_CTL	SNRPE	0.000538009	TRUE	IP_IN	0.51824	0.197808
7.48443e-05	-0.140058	0.091	0.149	1	DS_vs_CTL	COPB1	0.000538009	FALSE	IP_IN	0.693543	0.623962
7.50088e-05	-0.231351	0.177	0.275	1	DS_vs_CTL	LIN52	0.000538687	FALSE	IP_IN	1.58087	1.34118
7.54322e-05	0.223053	0.195	0.233	1	DS_vs_CTL	SLF2	0.000541221	FALSE	IP_IN	1.18638	1.37952
7.55319e-05	0.109051	0.488	0.576	1	DS_vs_CTL	ARID4B	0.00054143	FALSE	IP_IN	3.96002	4.26567
7.59835e-05	0.0117861	0.134	0.184	1	DS_vs_CTL	CERK	0.000544158	FALSE	IP_IN	0.825071	0.826499
7.63587e-05	0.101755	0.402	0.471	1	DS_vs_CTL	ZNF148	0.000546335	FALSE	IP_IN	3.01013	3.22481
7.77191e-05	-0.0330361	0.152	0.222	1	DS_vs_CTL	LARP1	0.00055555	FALSE	IP_IN	1.06987	1.04028
7.80005e-05	0.0949558	0.323	0.395	1	DS_vs_CTL	STRN3	0.000557043	FALSE	IP_IN	2.36189	2.51728
7.84697e-05	-0.0182836	0.043	0.078	1	DS_vs_CTL	MRS2	0.000559359	FALSE	IP_IN	0.342213	0.332547
7.86311e-05	-0.368599	0.427	0.595	1	DS_vs_CTL	KMT2A	0.000559359	TRUE	IP_IN	4.26745	3.29977
7.86346e-05	-0.225288	0.402	0.544	1	DS_vs_CTL	CEP192	0.000559359	FALSE	IP_IN	3.75426	3.20603
7.87123e-05	-0.616043	0.134	0.255	1	DS_vs_CTL	LANCL1	0.000559359	TRUE	IP_IN	1.36109	0.882444
7.87403e-05	1.5263	0.128	0.061	1	DS_vs_CTL	OPTN	0.000559359	TRUE	IP_IN	0.263457	0.754944
7.87625e-05	-1.4786	0.055	0.169	1	DS_vs_CTL	ZNF516	0.000559359	TRUE	IP_IN	0.84558	0.297597
7.88867e-05	1.68176	0.067	0.037	1	DS_vs_CTL	LINC00909	0.000559724	TRUE	IP_IN	0.144592	0.46019
7.90861e-05	-0.0771417	0.024	0.059	1	DS_vs_CTL	TPRKB	0.000560359	FALSE	IP_IN	0.239178	0.221339
7.91443e-05	0.686971	0.183	0.156	1	DS_vs_CTL	TYW1	0.000560359	TRUE	IP_IN	0.746593	1.19705
7.92115e-05	0.137053	0.226	0.278	1	DS_vs_CTL	DDX11	0.000560359	FALSE	IP_IN	1.45563	1.59542
7.92685e-05	-1.31541	0.061	0.175	1	DS_vs_CTL	SCML1	0.000560359	TRUE	IP_IN	0.813448	0.321057
7.9675e-05	0.561468	0.5	0.418	1	DS_vs_CTL	CDC42BPA	0.000562714	TRUE	IP_IN	2.71007	3.99446
8.02692e-05	-0.265917	0.756	0.885	1	DS_vs_CTL	SSH2	0.000566389	TRUE	IP_IN	12.6982	10.5552
8.04544e-05	0.623374	0.14	0.14	1	DS_vs_CTL	FNTA	0.000567174	TRUE	IP_IN	0.65465	1.00353
8.10548e-05	-0.610337	0.043	0.113	1	DS_vs_CTL	EED	0.000570882	TRUE	IP_IN	0.511959	0.32975
8.1366e-05	-0.0117248	0.213	0.292	1	DS_vs_CTL	ITGB1	0.000572548	FALSE	IP_IN	1.52911	1.51138
8.15216e-05	-0.655585	0.53	0.695	1	DS_vs_CTL	PTPRN2	0.000573117	TRUE	IP_IN	6.32481	4.00948
8.16979e-05	0.122512	0.299	0.36	1	DS_vs_CTL	CDC42SE2	0.000573713	FALSE	IP_IN	2.13039	2.31392
8.17793e-05	0.0930614	0.543	0.631	1	DS_vs_CTL	SBF2	0.000573713	FALSE	IP_IN	4.90991	5.23177
8.18308e-05	0.763175	0.311	0.259	1	DS_vs_CTL	PCCA	0.000573713	TRUE	IP_IN	1.48935	2.52294
8.26361e-05	0.279539	0.579	0.571	1	DS_vs_CTL	SETD5	0.00057883	TRUE	IP_IN	3.87633	4.69993
8.29052e-05	0.604349	0.22	0.192	1	DS_vs_CTL	CTTNBP2	0.000579251	TRUE	IP_IN	0.799898	1.21112
8.29288e-05	0.473087	0.299	0.29	1	DS_vs_CTL	NFAT5	0.000579251	TRUE	IP_IN	1.66185	2.30172
8.29387e-05	0.376971	0.262	0.271	1	DS_vs_CTL	KIAA1109	0.000579251	TRUE	IP_IN	1.3453	1.74189
8.29983e-05	1.25537	0.079	0.05	1	DS_vs_CTL	LRRC75A	0.000579251	TRUE	IP_IN	0.214285	0.507252
8.31906e-05	0.291533	0.22	0.255	1	DS_vs_CTL	CFL1	0.000580065	TRUE	IP_IN	1.16076	1.41552
8.35921e-05	0.72019	0.079	0.076	1	DS_vs_CTL	COPS2	0.000581549	TRUE	IP_IN	0.321951	0.525521
8.36292e-05	0.0850601	0.067	0.113	1	DS_vs_CTL	ATP5F1B	0.000581549	FALSE	IP_IN	0.482355	0.506348
8.36697e-05	-0.813474	0.152	0.294	1	DS_vs_CTL	NNT	0.000581549	TRUE	IP_IN	1.61601	0.913853
8.38241e-05	-0.156023	0.677	0.816	1	DS_vs_CTL	PSD3	0.000581549	FALSE	IP_IN	8.76009	7.85672
8.38476e-05	-0.443076	0.085	0.167	1	DS_vs_CTL	VEZF1	0.000581549	TRUE	IP_IN	0.774066	0.56383
8.38583e-05	0.0918382	0.25	0.304	1	DS_vs_CTL	SGCE	0.000581549	FALSE	IP_IN	1.68633	1.79187
8.49454e-05	-0.845986	0.085	0.194	1	DS_vs_CTL	SEC62	0.000588439	TRUE	IP_IN	0.923453	0.508065
8.50127e-05	0.28697	0.104	0.137	1	DS_vs_CTL	SPSB3	0.000588439	TRUE	IP_IN	0.34887	0.420466
8.51141e-05	0.152875	0.171	0.215	1	DS_vs_CTL	CELF5	0.000588439	FALSE	IP_IN	0.982637	1.08722
8.51587e-05	0.760519	0.226	0.179	1	DS_vs_CTL	ARHGEF10L	0.000588439	TRUE	IP_IN	0.86461	1.45991
8.53212e-05	1.81512	0.091	0.043	1	DS_vs_CTL	PDZD2	0.000589031	TRUE	IP_IN	0.146985	0.51377
8.57822e-05	1.60188	0.11	0.053	1	DS_vs_CTL	CHAF1B	0.000591681	TRUE	IP_IN	0.26167	0.790452
8.61248e-05	-0.705706	0.256	0.421	1	DS_vs_CTL	VPS13C	0.000593511	TRUE	IP_IN	2.51555	1.53675
8.62043e-05	0.934152	0.049	0.054	1	DS_vs_CTL	PLD5	0.000593525	TRUE	IP_IN	0.242609	0.458905
8.63836e-05	-0.286863	0.287	0.411	1	DS_vs_CTL	H2AFV	0.000594226	TRUE	IP_IN	2.46156	2.01221
8.70016e-05	0.409771	0.079	0.107	1	DS_vs_CTL	MCC	0.000597941	TRUE	IP_IN	0.637373	0.841633
8.77474e-05	-0.783238	0.226	0.393	1	DS_vs_CTL	MBNL1	0.000602413	TRUE	IP_IN	2.62804	1.52139
8.78825e-05	-0.397358	0.159	0.263	1	DS_vs_CTL	ZFC3H1	0.000602413	TRUE	IP_IN	1.33317	1.00668
8.7888e-05	0.472156	0.262	0.258	1	DS_vs_CTL	TUSC3	0.000602413	TRUE	IP_IN	1.33642	1.8488
8.86545e-05	0.988022	0.299	0.19	1	DS_vs_CTL	PTPRK	0.000607125	TRUE	IP_IN	1.05396	2.08589
8.90606e-05	0.992057	0.122	0.091	1	DS_vs_CTL	NDE1	0.000608889	TRUE	IP_IN	0.425496	0.841716
8.91879e-05	0.0608919	0.287	0.358	1	DS_vs_CTL	NINL	0.000608889	FALSE	IP_IN	2.00425	2.08534
8.92183e-05	0.000954706	0.323	0.399	1	DS_vs_CTL	USP22	0.000608889	FALSE	IP_IN	2.13083	2.12689
8.92296e-05	0.257513	0.116	0.155	1	DS_vs_CTL	PEBP1	0.000608889	TRUE	IP_IN	0.671446	0.797457
8.95947e-05	-0.355754	0.354	0.51	1	DS_vs_CTL	PPP3CA	0.000610837	TRUE	IP_IN	3.54153	2.76205
8.977e-05	0.273774	0.159	0.179	1	DS_vs_CTL	SIN3A	0.000611344	TRUE	IP_IN	0.88256	1.0618
8.98285e-05	0.23116	0.079	0.119	1	DS_vs_CTL	RNASEK	0.000611344	FALSE	IP_IN	0.492184	0.572498
9.02437e-05	-0.103107	0.061	0.101	1	DS_vs_CTL	UMPS	0.000613391	FALSE	IP_IN	0.44194	0.406059
9.02892e-05	2.27008	0.085	0.035	1	DS_vs_CTL	CALN1	0.000613391	TRUE	IP_IN	0.107547	0.516274
9.04148e-05	-0.497215	0.079	0.158	1	DS_vs_CTL	ZBTB1	0.0006137	TRUE	IP_IN	0.74282	0.520703
9.13234e-05	0.351222	0.213	0.229	1	DS_vs_CTL	RAB8B	0.00061932	TRUE	IP_IN	1.2562	1.59732
9.17215e-05	-0.222396	0.268	0.385	1	DS_vs_CTL	RPL8	0.00062147	FALSE	IP_IN	2.02784	1.73269
9.22315e-05	-0.543529	0.232	0.38	1	DS_vs_CTL	RPS19	0.000624374	TRUE	IP_IN	1.929	1.31788
9.31382e-05	-0.938889	0.024	0.083	1	DS_vs_CTL	PSMD12	0.000629956	TRUE	IP_IN	0.359353	0.181745
9.33258e-05	0.148434	0.244	0.296	1	DS_vs_CTL	RAB10	0.000630668	FALSE	IP_IN	1.71691	1.8977
9.39524e-05	-0.198713	0.317	0.442	1	DS_vs_CTL	CENPU	0.000634344	FALSE	IP_IN	2.53204	2.20079
9.45282e-05	-0.191686	0.183	0.279	1	DS_vs_CTL	IFT80	0.000636858	FALSE	IP_IN	1.50677	1.31386
9.45718e-05	0.309354	0.445	0.456	1	DS_vs_CTL	ADNP	0.000636858	TRUE	IP_IN	2.76562	3.42185
9.45738e-05	-0.39224	0.189	0.308	1	DS_vs_CTL	RHOBTB3	0.000636858	TRUE	IP_IN	1.75729	1.33343
9.48051e-05	-0.0677156	0.122	0.179	1	DS_vs_CTL	KPNA5	0.000637856	FALSE	IP_IN	0.820998	0.777972
9.57742e-05	1.47699	0.085	0.052	1	DS_vs_CTL	PLXNA3	0.000643811	TRUE	IP_IN	0.161624	0.4459
9.66154e-05	0.25143	0.171	0.215	1	DS_vs_CTL	AC004158.1	0.000648897	TRUE	IP_IN	1.06807	1.26622
9.6733e-05	-0.167696	0.098	0.154	1	DS_vs_CTL	CDC73	0.000649119	FALSE	IP_IN	0.735648	0.649491
9.72762e-05	-0.0634458	0.244	0.327	1	DS_vs_CTL	TRPM7	0.000652193	FALSE	IP_IN	1.85446	1.76929
9.75944e-05	-0.640812	0.085	0.18	1	DS_vs_CTL	POLH	0.000653755	TRUE	IP_IN	0.861687	0.547028
9.77338e-05	-0.458963	0.299	0.455	1	DS_vs_CTL	SETD2	0.000654117	TRUE	IP_IN	2.87663	2.08723
9.84752e-05	-0.252419	0.11	0.182	1	DS_vs_CTL	CYB5R4	0.000658504	TRUE	IP_IN	0.919999	0.76686
9.86204e-05	-0.355127	0.11	0.192	1	DS_vs_CTL	PCLAF	0.000658901	TRUE	IP_IN	1.00279	0.77847
9.95836e-05	3.3266	0.055	0.007	1	DS_vs_CTL	SST	0.000664757	TRUE	IP_IN	0.0297826	0.300226
9.98016e-05	-1.36873	0.049	0.159	1	DS_vs_CTL	AL033504.1	0.000665577	TRUE	IP_IN	1.20947	0.462537
9.98799e-05	0.477235	0.274	0.27	1	DS_vs_CTL	FAM171A1	0.000665577	TRUE	IP_IN	1.47442	2.04745
0.000100314	0.283185	0.268	0.298	1	DS_vs_CTL	KDM6A	0.000667889	TRUE	IP_IN	1.64551	1.9972
0.000100587	0.0879036	0.72	0.819	1	DS_vs_CTL	PANTR1	0.000669129	FALSE	IP_IN	8.88484	9.43773
0.000100797	-0.0760031	0.25	0.337	1	DS_vs_CTL	ZNF91	0.000669943	FALSE	IP_IN	1.70402	1.61119
0.000101086	-1.8748	0.03	0.128	1	DS_vs_CTL	GID8	0.000671111	TRUE	IP_IN	0.596846	0.156846
0.000101148	0.162154	0.396	0.447	1	DS_vs_CTL	WDFY3	0.000671111	FALSE	IP_IN	2.69468	3.00997
0.000101683	0.903714	0.128	0.093	1	DS_vs_CTL	LINC00106	0.000673597	TRUE	IP_IN	0.418565	0.77839
0.000101732	0.0901931	0.22	0.27	1	DS_vs_CTL	DHX15	0.000673597	FALSE	IP_IN	1.29912	1.37763
0.000101786	-1.71465	0.091	0.221	1	DS_vs_CTL	AC109466.1	0.000673597	TRUE	IP_IN	1.86577	0.562587
0.000101949	0.00164241	0.067	0.102	1	DS_vs_CTL	C18orf54	0.000674091	FALSE	IP_IN	0.458693	0.453869
0.000102533	0.221642	0.299	0.335	1	DS_vs_CTL	SMAD4	0.00067737	FALSE	IP_IN	1.74797	2.03302
0.000102741	-2.18072	0.018	0.104	1	DS_vs_CTL	SASH1	0.00067787	TRUE	IP_IN	0.572093	0.120252
0.000102831	0.225188	0.323	0.363	1	DS_vs_CTL	ADD1	0.00067787	FALSE	IP_IN	1.94174	2.26454
0.000102874	0.249066	0.372	0.398	1	DS_vs_CTL	MYO9B	0.00067787	FALSE	IP_IN	2.36363	2.80382
0.000103181	-0.0176948	0.091	0.134	1	DS_vs_CTL	ADAM9	0.000679313	FALSE	IP_IN	0.588249	0.575722
0.000103891	-0.27078	0.22	0.33	1	DS_vs_CTL	ATF2	0.0006834	TRUE	IP_IN	1.75049	1.44546
0.000104422	0.655057	0.329	0.279	1	DS_vs_CTL	SOBP	0.000686307	TRUE	IP_IN	1.51888	2.38683
0.000105082	0.170437	0.415	0.477	1	DS_vs_CTL	KLF7	0.000690051	FALSE	IP_IN	3.13097	3.51834
0.000105503	-0.46334	0.287	0.443	1	DS_vs_CTL	TRERF1	0.000692219	TRUE	IP_IN	2.92447	2.11558
0.000105802	1.561	0.104	0.05	1	DS_vs_CTL	VTI1B	0.000692651	TRUE	IP_IN	0.218926	0.642075
0.000105863	0.386392	0.11	0.119	1	DS_vs_CTL	SFT2D2	0.000692651	TRUE	IP_IN	0.549958	0.713746
0.000105929	0.105045	0.585	0.682	1	DS_vs_CTL	TFDP2	0.000692651	FALSE	IP_IN	6.3221	6.7943
0.00010593	-0.0416096	0.14	0.195	1	DS_vs_CTL	NUP210	0.000692651	FALSE	IP_IN	0.994911	0.961257
0.000106431	-2.06538	0.03	0.13	1	DS_vs_CTL	AGL	0.000695338	TRUE	IP_IN	0.635608	0.145944
0.000106959	-1.33761	0.055	0.161	1	DS_vs_CTL	HIST1H1C	0.000698194	TRUE	IP_IN	0.789226	0.306476
0.000107595	0.759316	0.128	0.114	1	DS_vs_CTL	LRRC41	0.000701204	TRUE	IP_IN	0.504774	0.849598
0.000107603	-5.07824	0	0.05	1	DS_vs_CTL	SLU7	0.000701204	TRUE	IP_IN	0.205246	0
0.000108132	-0.112844	0.183	0.267	1	DS_vs_CTL	RPL9	0.000704049	FALSE	IP_IN	1.30377	1.20027
0.000108349	-0.169767	0.396	0.526	1	DS_vs_CTL	KHDRBS1	0.000704774	FALSE	IP_IN	3.36189	2.98324
0.000108427	0.459792	0.335	0.321	1	DS_vs_CTL	DLGAP4	0.000704774	TRUE	IP_IN	1.6294	2.23592
0.000108671	0.438812	0.116	0.13	1	DS_vs_CTL	CARS2	0.000705762	TRUE	IP_IN	0.592394	0.797903
0.000109066	-0.0453425	0.116	0.179	1	DS_vs_CTL	OIP5	0.000707732	FALSE	IP_IN	0.93588	0.901554
0.000109171	1.30426	0.079	0.052	1	DS_vs_CTL	PTPRF	0.000707812	TRUE	IP_IN	0.206559	0.505867
0.000109907	0.463341	0.098	0.121	1	DS_vs_CTL	EIF1B	0.000711983	TRUE	IP_IN	0.471774	0.645386
0.000110012	1.65643	0.11	0.047	1	DS_vs_CTL	AP006621.3	0.000712059	TRUE	IP_IN	0.200828	0.62935
0.000110308	-0.143728	0.11	0.169	1	DS_vs_CTL	RALGAPB	0.000712634	FALSE	IP_IN	0.758227	0.680912
0.000110356	-1.29713	0.061	0.173	1	DS_vs_CTL	ARL4C	0.000712634	TRUE	IP_IN	0.857749	0.343255
0.000110379	0.222099	0.585	0.643	1	DS_vs_CTL	DPYSL3	0.000712634	FALSE	IP_IN	5.22454	6.08884
0.000110744	-0.490246	0.415	0.586	1	DS_vs_CTL	FAM172A	0.00071439	TRUE	IP_IN	4.32346	3.07232
0.000111392	2.58898	0.073	0.015	1	DS_vs_CTL	ACTN2	0.000717965	TRUE	IP_IN	0.0689842	0.413479
0.000111591	0.911023	0.061	0.059	1	DS_vs_CTL	HDAC7	0.000718645	TRUE	IP_IN	0.233993	0.435309
0.000112557	-0.328925	0.274	0.41	1	DS_vs_CTL	PRRC2C	0.000724253	TRUE	IP_IN	2.30792	1.8319
0.000112726	-0.0399076	0.195	0.268	1	DS_vs_CTL	RNF115	0.000724735	FALSE	IP_IN	1.51507	1.46837
0.000113625	0.757366	0.159	0.134	1	DS_vs_CTL	NISCH	0.000729554	TRUE	IP_IN	0.553751	0.931233
0.000113666	-0.411993	0.384	0.552	1	DS_vs_CTL	SESTD1	0.000729554	TRUE	IP_IN	3.91131	2.93415
0.000113901	0.244521	0.299	0.332	1	DS_vs_CTL	FBXO42	0.000730449	FALSE	IP_IN	1.91422	2.26256
0.000114574	0.0447536	0.207	0.273	1	DS_vs_CTL	PCBP1-AS1	0.00073377	FALSE	IP_IN	1.44538	1.48559
0.00011461	0.345657	0.22	0.236	1	DS_vs_CTL	CEP85L	0.00073377	TRUE	IP_IN	1.21131	1.5341
0.00011511	-0.288351	0.488	0.641	1	DS_vs_CTL	NCOA1	0.000736361	TRUE	IP_IN	5.0669	4.14348
0.000115698	-0.650053	0.104	0.204	1	DS_vs_CTL	FLOT1	0.000739506	TRUE	IP_IN	0.955176	0.603073
0.000116283	0.640711	0.213	0.215	1	DS_vs_CTL	SLCO5A1	0.000741695	TRUE	IP_IN	1.23419	1.9193
0.000116326	-0.486669	0.134	0.245	1	DS_vs_CTL	CREBZF	0.000741695	TRUE	IP_IN	1.12373	0.796409
0.000116331	-0.0126897	0.5	0.624	1	DS_vs_CTL	GPM6B	0.000741695	FALSE	IP_IN	5.20448	5.15355
0.000116525	-0.115468	0.305	0.411	1	DS_vs_CTL	MICU1	0.000742315	FALSE	IP_IN	2.53509	2.33469
0.000117425	0.212017	0.28	0.314	1	DS_vs_CTL	TCERG1	0.000747427	FALSE	IP_IN	1.60034	1.84845
0.000117591	0.288255	0.512	0.529	1	DS_vs_CTL	BRAF	0.000747865	TRUE	IP_IN	3.83924	4.68315
0.000117911	-0.196618	0.098	0.165	1	DS_vs_CTL	ULK1	0.000749276	FALSE	IP_IN	0.696775	0.602559
0.000118094	-0.776089	0.043	0.114	1	DS_vs_CTL	ZNF700	0.00074972	TRUE	IP_IN	0.532208	0.305122
0.000118176	0.330849	0.171	0.19	1	DS_vs_CTL	CAPZA1	0.00074972	TRUE	IP_IN	0.961614	1.20432
0.000119131	0.258614	0.073	0.101	1	DS_vs_CTL	TMEM242	0.000755153	TRUE	IP_IN	0.467596	0.554199
0.000120084	-0.684312	0.067	0.152	1	DS_vs_CTL	GABARAP	0.000760562	TRUE	IP_IN	0.679754	0.417382
0.000120964	0.567204	0.183	0.173	1	DS_vs_CTL	GCC2	0.000765505	TRUE	IP_IN	0.864461	1.27584
0.000121355	0.510699	0.11	0.107	1	DS_vs_CTL	NDUFV3	0.000767351	TRUE	IP_IN	0.447061	0.631918
0.000121683	0.217065	0.329	0.375	1	DS_vs_CTL	JPX	0.000768785	FALSE	IP_IN	2.15686	2.50184
0.000122194	-0.93569	0.122	0.257	1	DS_vs_CTL	HIST1H1D	0.000771384	TRUE	IP_IN	1.31929	0.684011
0.000122636	-0.963147	0.079	0.189	1	DS_vs_CTL	CEP70	0.000773431	TRUE	IP_IN	0.937736	0.475287
0.000122805	0.650424	0.305	0.268	1	DS_vs_CTL	PDSS2	0.000773431	TRUE	IP_IN	1.62306	2.54268
0.000122821	-0.438058	0.189	0.318	1	DS_vs_CTL	UBE2D3	0.000773431	TRUE	IP_IN	1.72282	1.26612
0.000123133	0.450807	0.085	0.098	1	DS_vs_CTL	PPP5C	0.000774756	TRUE	IP_IN	0.40809	0.552708
0.000124724	0.250082	0.061	0.085	1	DS_vs_CTL	2024-03-08	0.000784128	TRUE	IP_IN	0.382738	0.449976
0.000125985	0.488597	0.183	0.18	1	DS_vs_CTL	SMPD4	0.00078974	TRUE	IP_IN	0.793426	1.1082
0.000125999	0.399459	0.207	0.224	1	DS_vs_CTL	SRRM3	0.00078974	TRUE	IP_IN	1.13138	1.4872
0.000126041	0.093072	0.11	0.153	1	DS_vs_CTL	UBL3	0.00078974	FALSE	IP_IN	0.715159	0.75752
0.00012605	-0.0939842	0.232	0.318	1	DS_vs_CTL	KMT5B	0.00078974	FALSE	IP_IN	1.68893	1.57702
0.000126132	0.48115	0.152	0.165	1	DS_vs_CTL	SPOP	0.00078974	TRUE	IP_IN	0.814879	1.1324
0.000126247	-0.475664	0.122	0.224	1	DS_vs_CTL	SRSF3	0.000789819	TRUE	IP_IN	1.06604	0.761072
0.000126731	-0.263657	0.079	0.141	1	DS_vs_CTL	TUG1	0.000792197	TRUE	IP_IN	0.650636	0.536491
0.000126834	-0.0931568	0.39	0.499	1	DS_vs_CTL	ERBIN	0.000792198	FALSE	IP_IN	3.39618	3.17842
0.000126989	-0.403639	0.183	0.3	1	DS_vs_CTL	RPL21	0.000792517	TRUE	IP_IN	1.51236	1.13774
0.000127193	-0.222705	0.28	0.395	1	DS_vs_CTL	UBXN4	0.000793145	FALSE	IP_IN	2.25356	1.92575
0.000127894	-0.475185	0.207	0.354	1	DS_vs_CTL	NIN	0.00079687	TRUE	IP_IN	2.09937	1.50467
0.000128506	-1.77412	0.043	0.149	1	DS_vs_CTL	UBE2S	0.00080003	TRUE	IP_IN	0.690457	0.195992
0.000129097	0.376156	0.165	0.172	1	DS_vs_CTL	MED15	0.00080285	TRUE	IP_IN	0.808647	1.0444
0.000129222	0.0895786	0.25	0.299	1	DS_vs_CTL	CAMSAP1	0.00080285	FALSE	IP_IN	1.49097	1.58118
0.000129272	-2.16007	0.018	0.102	1	DS_vs_CTL	UBE2C	0.00080285	TRUE	IP_IN	0.435758	0.091569
0.000129492	-0.146074	0.201	0.284	1	DS_vs_CTL	LINC01578	0.000803562	FALSE	IP_IN	1.35885	1.22258
0.000130136	-0.463133	0.14	0.249	1	DS_vs_CTL	MTCL1	0.000806909	TRUE	IP_IN	1.28206	0.924468
0.000130297	-0.0830199	0.11	0.163	1	DS_vs_CTL	GRAMD1A	0.000807253	FALSE	IP_IN	0.751162	0.703768
0.000131107	-0.890189	0.232	0.396	1	DS_vs_CTL	ARNT2	0.000811615	TRUE	IP_IN	2.40891	1.29402
0.000131323	0.968176	0.274	0.173	1	DS_vs_CTL	CSMD1	0.000812294	TRUE	IP_IN	0.994285	1.94056
0.000131529	-0.139488	0.226	0.318	1	DS_vs_CTL	SHPRH	0.000812918	FALSE	IP_IN	1.75701	1.58967
0.000131668	-0.22058	0.274	0.382	1	DS_vs_CTL	SLTM	0.000813122	FALSE	IP_IN	2.16851	1.85561
0.000131896	-1.15728	0.043	0.128	1	DS_vs_CTL	FIGNL1	0.000813869	TRUE	IP_IN	0.582018	0.255191
0.000132148	-0.549091	0.159	0.282	1	DS_vs_CTL	KIAA2026	0.000814393	TRUE	IP_IN	1.4838	1.00852
0.000132193	0.0474831	0.299	0.37	1	DS_vs_CTL	DHX9	0.000814393	FALSE	IP_IN	1.9241	1.98316
0.000133029	-0.210664	0.28	0.39	1	DS_vs_CTL	TPR	0.000818431	FALSE	IP_IN	2.26548	1.95224
0.000133062	-0.702256	0.091	0.196	1	DS_vs_CTL	PIGN	0.000818431	TRUE	IP_IN	1.03296	0.629231
0.000133305	0.0488717	0.085	0.128	1	DS_vs_CTL	LSM8	0.000819271	FALSE	IP_IN	0.605435	0.620974
0.000133581	0.933272	0.085	0.072	1	DS_vs_CTL	B3GLCT	0.00082031	TRUE	IP_IN	0.329268	0.624107
0.000133945	0.335919	0.085	0.099	1	DS_vs_CTL	METAP1	0.000821888	TRUE	IP_IN	0.430444	0.538148
0.000134219	1.32639	0.073	0.049	1	DS_vs_CTL	NCLN	0.000822911	TRUE	IP_IN	0.192195	0.477763
0.000134394	-0.0355563	0.189	0.254	1	DS_vs_CTL	EIF4G2	0.000823322	FALSE	IP_IN	1.10769	1.07536
0.000134544	-0.148603	0.329	0.44	1	DS_vs_CTL	RBBP4	0.000823586	FALSE	IP_IN	2.51956	2.26753
0.000135401	-0.285715	0.067	0.126	1	DS_vs_CTL	ATG5	0.000827588	TRUE	IP_IN	0.572024	0.463769
0.000135414	-0.548781	0.201	0.337	1	DS_vs_CTL	HIBCH	0.000827588	TRUE	IP_IN	1.91297	1.30212
0.000136099	-0.305317	0.03	0.067	1	DS_vs_CTL	NELFB	0.000831114	TRUE	IP_IN	0.243679	0.191711
0.000136516	-0.457859	0.439	0.609	1	DS_vs_CTL	HNRNPU	0.000833	TRUE	IP_IN	4.15589	3.02021
0.000136705	-0.446925	0.366	0.528	1	DS_vs_CTL	DEK	0.000833474	TRUE	IP_IN	3.36267	2.46133
0.000136811	0.193599	0.122	0.168	1	DS_vs_CTL	ARPC1A	0.000833474	FALSE	IP_IN	0.840228	0.955657
0.000138517	0.206352	0.183	0.218	1	DS_vs_CTL	NCKAP1	0.000843197	FALSE	IP_IN	1.1254	1.29321
0.00013873	1.27751	0.067	0.055	1	DS_vs_CTL	MCF2L	0.000843821	TRUE	IP_IN	0.173089	0.415326
0.000139163	0.516242	0.256	0.241	1	DS_vs_CTL	ENSA	0.000845787	TRUE	IP_IN	1.30176	1.85679
0.000140685	0.73898	0.128	0.107	1	DS_vs_CTL	MRPS16	0.000854355	TRUE	IP_IN	0.44944	0.745268
0.000140953	-0.555691	0.11	0.209	1	DS_vs_CTL	PLEKHO1	0.000855202	TRUE	IP_IN	0.934728	0.630337
0.000141047	0.155422	0.305	0.359	1	DS_vs_CTL	ZNF131	0.000855202	FALSE	IP_IN	2.02839	2.25385
0.000141561	1.13571	0.104	0.068	1	DS_vs_CTL	GTF2H2	0.000857641	TRUE	IP_IN	0.293886	0.641298
0.000141831	0.290812	0.317	0.342	1	DS_vs_CTL	CRLF3	0.0008586	TRUE	IP_IN	2.02608	2.47338
0.000142871	-0.100638	0.201	0.277	1	DS_vs_CTL	PHF3	0.000863744	FALSE	IP_IN	1.40125	1.30144
0.000142906	0.517247	0.195	0.179	1	DS_vs_CTL	DGCR2	0.000863744	TRUE	IP_IN	0.853406	1.21639
0.000143074	0.856255	0.116	0.098	1	DS_vs_CTL	TBC1D9	0.000864076	TRUE	IP_IN	0.445063	0.800973
0.000143589	0.213082	0.226	0.257	1	DS_vs_CTL	AC118549.1	0.000866345	FALSE	IP_IN	1.44482	1.66955
0.000143676	-0.167214	0.159	0.233	1	DS_vs_CTL	INTS7	0.000866345	FALSE	IP_IN	1.18494	1.04983
0.00014431	1.09851	0.104	0.072	1	DS_vs_CTL	STRIP1	0.000869485	TRUE	IP_IN	0.30287	0.644054
0.000144516	-0.903809	0.11	0.238	1	DS_vs_CTL	PCDH17	0.000869523	TRUE	IP_IN	1.3953	0.740053
0.000144543	-0.542301	0.14	0.261	1	DS_vs_CTL	PTBP3	0.000869523	TRUE	IP_IN	1.37253	0.936898
0.000144784	0.569323	0.159	0.148	1	DS_vs_CTL	CYFIP2	0.000869696	TRUE	IP_IN	0.665135	0.981962
0.000144905	0.254589	0.207	0.235	1	DS_vs_CTL	UBE2W	0.000869696	TRUE	IP_IN	1.2114	1.44
0.000144912	0.960967	0.14	0.104	1	DS_vs_CTL	CRTC1	0.000869696	TRUE	IP_IN	0.453039	0.877256
0.000146049	-0.587778	0.171	0.304	1	DS_vs_CTL	DCBLD2	0.000875596	TRUE	IP_IN	1.67756	1.1106
0.000146123	0.183844	0.073	0.103	1	DS_vs_CTL	AP4M1	0.000875596	FALSE	IP_IN	0.457578	0.514522
0.000146783	-0.536352	0.207	0.342	1	DS_vs_CTL	TPGS2	0.000878866	TRUE	IP_IN	1.94675	1.33673
0.000147091	0.848207	0.146	0.12	1	DS_vs_CTL	ATP5F1E	0.000880023	TRUE	IP_IN	0.479422	0.85834
0.000147222	-0.244197	0.079	0.14	1	DS_vs_CTL	PRPF6	0.000880116	FALSE	IP_IN	0.656554	0.548855
0.000147341	0.797302	0.177	0.146	1	DS_vs_CTL	CLASRP	0.000880143	TRUE	IP_IN	0.634554	1.09797
0.000148118	0.677573	0.152	0.141	1	DS_vs_CTL	RHOT2	0.0008841	TRUE	IP_IN	0.520655	0.827864
0.000148573	-0.19639	0.134	0.211	1	DS_vs_CTL	GOPC	0.0008857	FALSE	IP_IN	0.999077	0.866484
0.000148617	0.191961	0.104	0.134	1	DS_vs_CTL	OTUD4	0.0008857	FALSE	IP_IN	0.639879	0.725703
0.000149302	0.00490222	0.134	0.187	1	DS_vs_CTL	SEC11A	0.000888797	FALSE	IP_IN	0.917067	0.914844
0.000149379	0.343527	0.159	0.178	1	DS_vs_CTL	NFX1	0.000888797	TRUE	IP_IN	0.885606	1.11856
0.000149485	0.97624	0.22	0.148	1	DS_vs_CTL	SOD2	0.000888797	TRUE	IP_IN	0.729383	1.43032
0.000150165	0.759141	0.11	0.092	1	DS_vs_CTL	LTBP3	0.000892152	TRUE	IP_IN	0.391293	0.65743
0.000150716	0.685543	0.14	0.129	1	DS_vs_CTL	FAM117B	0.00089473	TRUE	IP_IN	0.613917	0.982478
0.000150977	0.476884	0.567	0.577	1	DS_vs_CTL	PDE4D	0.000895345	TRUE	IP_IN	5.22581	7.26789
0.000151053	0.636141	0.25	0.224	1	DS_vs_CTL	RPRD1A	0.000895345	TRUE	IP_IN	1.0694	1.6571
0.000152522	-0.0470542	0.287	0.381	1	DS_vs_CTL	RIF1	0.000903283	FALSE	IP_IN	2.13832	2.06433
0.000152628	-0.357949	0.274	0.409	1	DS_vs_CTL	FANCI	0.000903283	TRUE	IP_IN	2.47604	1.92648
0.000153062	0.553873	0.098	0.099	1	DS_vs_CTL	AP3D1	0.000905154	TRUE	IP_IN	0.445196	0.648562
0.000153228	0.189073	0.226	0.273	1	DS_vs_CTL	ADD2	0.000905439	FALSE	IP_IN	1.3905	1.57997
0.000153475	-0.174573	0.116	0.179	1	DS_vs_CTL	CHD4	0.0009062	FALSE	IP_IN	0.825152	0.725677
0.000153694	0.213141	0.122	0.146	1	DS_vs_CTL	SCCPDH	0.000906796	FALSE	IP_IN	0.676302	0.778748
0.000153981	0.654537	0.152	0.154	1	DS_vs_CTL	GADD45G	0.000907787	TRUE	IP_IN	0.643054	1.00732
0.000154382	0.392614	0.189	0.191	1	DS_vs_CTL	UBAC2	0.000909456	TRUE	IP_IN	0.957371	1.2517
0.000154675	-0.247917	0.195	0.297	1	DS_vs_CTL	PPP3CB	0.000910481	FALSE	IP_IN	1.59925	1.34128
0.000155098	-0.290935	0.183	0.283	1	DS_vs_CTL	LNPK	0.000911651	TRUE	IP_IN	1.47303	1.19853
0.000155111	0.50756	0.116	0.127	1	DS_vs_CTL	PAGR1	0.000911651	TRUE	IP_IN	0.510632	0.720906
0.000156718	0.101736	0.201	0.264	1	DS_vs_CTL	DNER	0.000919755	FALSE	IP_IN	1.44845	1.54898
0.00015673	0.264753	0.335	0.357	1	DS_vs_CTL	ZFP90	0.000919755	TRUE	IP_IN	1.88791	2.26299
0.000157158	0.28558	0.171	0.204	1	DS_vs_CTL	TBC1D16	0.000921561	TRUE	IP_IN	1.03871	1.2609
0.000157759	-0.68879	0.268	0.432	1	DS_vs_CTL	HS2ST1	0.000924381	TRUE	IP_IN	3.23502	2.00129
0.000159025	-0.312752	0.232	0.356	1	DS_vs_CTL	ZMYND8	0.000931086	TRUE	IP_IN	2.06784	1.65934
0.000159338	1.39053	0.104	0.06	1	DS_vs_CTL	EPB41L3	0.000932204	TRUE	IP_IN	0.280638	0.731636
0.000159888	0.115202	0.183	0.237	1	DS_vs_CTL	SUN1	0.000933248	FALSE	IP_IN	1.05277	1.13499
0.000159966	0.478174	0.14	0.138	1	DS_vs_CTL	ARFGAP2	0.000933248	TRUE	IP_IN	0.565395	0.782531
0.00016	0.261407	0.146	0.173	1	DS_vs_CTL	MSI1	0.000933248	TRUE	IP_IN	0.814698	0.971338
0.000160003	-0.110318	0.165	0.234	1	DS_vs_CTL	ZNF718	0.000933248	FALSE	IP_IN	1.20369	1.10967
0.000160534	0.76318	0.195	0.151	1	DS_vs_CTL	WDR47	0.000935105	TRUE	IP_IN	0.685963	1.15941
0.000160565	-0.546918	0.244	0.395	1	DS_vs_CTL	UBE2E1	0.000935105	TRUE	IP_IN	2.53736	1.73119
0.000160778	-1.43878	0.073	0.194	1	DS_vs_CTL	TTC7B	0.000935335	TRUE	IP_IN	0.99715	0.362007
0.000160848	-0.902056	0.067	0.16	1	DS_vs_CTL	POU3F4	0.000935335	TRUE	IP_IN	0.791415	0.417809
0.00016262	0.220892	0.311	0.364	1	DS_vs_CTL	RPS4X	0.000944599	FALSE	IP_IN	1.80507	2.0985
0.000162767	-0.0934183	0.11	0.165	1	DS_vs_CTL	VPS35	0.000944599	FALSE	IP_IN	0.769761	0.716103
0.000162811	-0.433028	0.36	0.511	1	DS_vs_CTL	RPL13	0.000944599	TRUE	IP_IN	2.97742	2.19985
0.000162998	-0.452325	0.195	0.311	1	DS_vs_CTL	ZNF738	0.00094497	TRUE	IP_IN	1.58305	1.15145
0.000164046	0.925788	0.201	0.144	1	DS_vs_CTL	ME3	0.000950327	TRUE	IP_IN	0.693378	1.31255
0.000164482	-0.176877	0.098	0.157	1	DS_vs_CTL	SRSF6	0.000951709	FALSE	IP_IN	0.627869	0.549989
0.000164533	-0.830452	0.061	0.148	1	DS_vs_CTL	RBM12B	0.000951709	TRUE	IP_IN	0.681614	0.377633
0.000165149	0.425803	0.14	0.146	1	DS_vs_CTL	ATAT1	0.000954189	TRUE	IP_IN	0.616147	0.822593
0.000165303	1.85408	0.061	0.034	1	DS_vs_CTL	CNIH2	0.000954189	TRUE	IP_IN	0.0919849	0.32916
0.000165335	0.438568	0.104	0.125	1	DS_vs_CTL	SWT1	0.000954189	TRUE	IP_IN	0.575866	0.775367
0.000166405	-0.302196	0.256	0.374	1	DS_vs_CTL	NREP	0.000959645	TRUE	IP_IN	1.88171	1.52061
0.000166551	-0.123424	0.14	0.206	1	DS_vs_CTL	RPAIN	0.000959763	FALSE	IP_IN	0.963436	0.879032
0.000166797	0.0800871	0.25	0.313	1	DS_vs_CTL	FAM49B	0.000959875	FALSE	IP_IN	1.7426	1.83677
0.00016682	0.754605	0.299	0.228	1	DS_vs_CTL	ITGB8	0.000959875	TRUE	IP_IN	1.22681	2.065
0.000167297	-0.899739	0.207	0.366	1	DS_vs_CTL	KIF11	0.000961896	TRUE	IP_IN	2.2453	1.19775
0.00016751	-0.852722	0.091	0.207	1	DS_vs_CTL	ATP6AP1L	0.000962328	TRUE	IP_IN	1.09916	0.602968
0.000167623	-0.0314959	0.512	0.622	1	DS_vs_CTL	XRCC5	0.000962328	FALSE	IP_IN	4.39124	4.29105
0.000168789	1.04033	0.11	0.075	1	DS_vs_CTL	NUDCD1	0.000967909	TRUE	IP_IN	0.344053	0.70306
0.000168848	-0.620938	0.152	0.278	1	DS_vs_CTL	RPL36A	0.000967909	TRUE	IP_IN	1.35365	0.874597
0.000169069	0.742858	0.25	0.22	1	DS_vs_CTL	NLK	0.000968452	TRUE	IP_IN	1.32746	2.21665
0.000171059	0.478535	0.238	0.225	1	DS_vs_CTL	MAP3K2	0.000979121	TRUE	IP_IN	1.13213	1.57238
0.000171416	0.142163	0.098	0.131	1	DS_vs_CTL	SMARCB1	0.000980432	FALSE	IP_IN	0.588047	0.643675
0.00017309	0.299548	0.378	0.397	1	DS_vs_CTL	KIAA1841	0.000989271	TRUE	IP_IN	2.42056	2.97395
0.000173313	0.342722	0.171	0.191	1	DS_vs_CTL	PACSIN2	0.000989805	TRUE	IP_IN	0.931492	1.17612
0.000174146	-0.419508	0.171	0.279	1	DS_vs_CTL	ZNF711	0.000993519	TRUE	IP_IN	1.32826	0.987579
0.000174222	1.40198	0.116	0.063	1	DS_vs_CTL	PRAG1	0.000993519	TRUE	IP_IN	0.299765	0.788058
0.000175063	0.918681	0.11	0.089	1	DS_vs_CTL	AFDN-DT	0.000997106	TRUE	IP_IN	0.35996	0.675785
0.000175111	0.179833	0.451	0.502	1	DS_vs_CTL	PDS5A	0.000997106	FALSE	IP_IN	3.14039	3.55204
0.000175461	0.606737	0.146	0.131	1	DS_vs_CTL	FOXN4	0.000998298	TRUE	IP_IN	0.581478	0.880527
0.000175581	-0.2997	0.189	0.291	1	DS_vs_CTL	DHX36	0.000998298	TRUE	IP_IN	1.50811	1.21973
0.000175773	-0.0544412	0.567	0.677	1	DS_vs_CTL	ACTG1	0.00099865	FALSE	IP_IN	4.72372	4.54342
0.000176428	0.0048763	0.171	0.224	1	DS_vs_CTL	SRGAP2C	0.00100163	FALSE	IP_IN	1.08027	1.07858
0.000177312	-0.448402	0.061	0.127	1	DS_vs_CTL	PDZD8	0.00100591	TRUE	IP_IN	0.603152	0.436475
0.000177622	0.263788	0.177	0.207	1	DS_vs_CTL	POLA2	0.00100692	TRUE	IP_IN	1.10152	1.31732
0.000177995	0.207504	0.116	0.15	1	DS_vs_CTL	SNRPD1	0.00100829	FALSE	IP_IN	0.691378	0.793096
0.000178197	-0.36678	0.329	0.481	1	DS_vs_CTL	KIF15	0.00100868	TRUE	IP_IN	3.17598	2.45749
0.000179528	0.891053	0.14	0.106	1	DS_vs_CTL	PRKRA	0.00101547	TRUE	IP_IN	0.466797	0.860984
0.000180392	0.648193	0.128	0.126	1	DS_vs_CTL	ZKSCAN7-AS1	0.00101915	TRUE	IP_IN	0.587108	0.915197
0.000180445	2.23557	0.055	0.027	1	DS_vs_CTL	HIP1R	0.00101915	TRUE	IP_IN	0.0692332	0.323492
0.000181161	-0.0680587	0.159	0.218	1	DS_vs_CTL	HECTD2	0.00102245	FALSE	IP_IN	1.07246	1.01766
0.000181459	1.62259	0.091	0.052	1	DS_vs_CTL	SLC22A17	0.00102337	TRUE	IP_IN	0.150066	0.458307
0.000181999	0.485352	0.116	0.143	1	DS_vs_CTL	VPS28	0.0010253	TRUE	IP_IN	0.425527	0.59066
0.000182068	0.464323	0.159	0.161	1	DS_vs_CTL	SIL1	0.0010253	TRUE	IP_IN	0.855	1.17456
0.000182261	0.0460334	0.195	0.248	1	DS_vs_CTL	CENPO	0.00102564	FALSE	IP_IN	1.27221	1.30814
0.000185195	-0.0127405	0.183	0.249	1	DS_vs_CTL	KDM4B	0.00104138	FALSE	IP_IN	1.26266	1.2462
0.000185738	0.743871	0.409	0.303	1	DS_vs_CTL	NCAM2	0.00104367	TRUE	IP_IN	2.20006	3.67953
0.000186443	0.251726	0.256	0.282	1	DS_vs_CTL	CBFB	0.00104635	TRUE	IP_IN	1.56166	1.85415
0.000186541	0.48705	0.098	0.104	1	DS_vs_CTL	LINC01224	0.00104635	TRUE	IP_IN	0.494081	0.687446
0.000186775	1.90576	0.11	0.045	1	DS_vs_CTL	THRB	0.00104635	TRUE	IP_IN	0.217614	0.812129
0.000186841	-0.0999929	0.152	0.215	1	DS_vs_CTL	LRRC40	0.00104635	FALSE	IP_IN	1.06884	0.991873
0.000186897	0.240946	0.22	0.263	1	DS_vs_CTL	NARF	0.00104635	FALSE	IP_IN	1.22089	1.4376
0.000187174	1.60899	0.122	0.057	1	DS_vs_CTL	CDH10	0.00104714	TRUE	IP_IN	0.243721	0.739636
0.000187453	0.745217	0.262	0.217	1	DS_vs_CTL	PELI2	0.00104793	TRUE	IP_IN	1.27864	2.13845
0.000187657	0.39245	0.195	0.214	1	DS_vs_CTL	ZNF124	0.00104831	TRUE	IP_IN	1.0961	1.43365
0.000188835	-0.249246	0.213	0.315	1	DS_vs_CTL	UBE4B	0.00105337	FALSE	IP_IN	1.74268	1.46072
0.000188838	0.386954	0.201	0.217	1	DS_vs_CTL	GON4L	0.00105337	TRUE	IP_IN	1.11051	1.44701
0.000189515	-0.288289	0.116	0.193	1	DS_vs_CTL	SNRNP200	0.00105638	TRUE	IP_IN	0.828205	0.672712
0.000191567	0.381493	0.305	0.306	1	DS_vs_CTL	AFF4	0.00106704	TRUE	IP_IN	1.65609	2.15226
0.000192	0.130668	0.47	0.532	1	DS_vs_CTL	CENPK	0.00106868	FALSE	IP_IN	3.66954	4.01214
0.000192649	0.534397	0.104	0.107	1	DS_vs_CTL	EIF3K	0.00107085	TRUE	IP_IN	0.453645	0.65202
0.000192669	1.38044	0.055	0.046	1	DS_vs_CTL	SEMA3C	0.00107085	TRUE	IP_IN	0.115746	0.297199
0.000193029	0.562943	0.159	0.148	1	DS_vs_CTL	CTTN	0.00107207	TRUE	IP_IN	0.658365	0.967601
0.000193393	-0.0168797	0.238	0.318	1	DS_vs_CTL	RPS13	0.00107262	FALSE	IP_IN	1.74723	1.72155
0.000193552	0.0163782	0.28	0.349	1	DS_vs_CTL	ASB3	0.00107262	FALSE	IP_IN	2.00791	2.0255
0.000193658	0.96136	0.159	0.114	1	DS_vs_CTL	TGIF2	0.00107262	TRUE	IP_IN	0.566105	1.09765
0.000193688	0.115709	0.207	0.263	1	DS_vs_CTL	FBXL17	0.00107262	FALSE	IP_IN	1.57373	1.69987
0.000194016	-0.767927	0.226	0.384	1	DS_vs_CTL	SLC4A4	0.00107367	TRUE	IP_IN	2.71917	1.59121
0.000195177	-0.485045	0.14	0.245	1	DS_vs_CTL	MBIP	0.00107825	TRUE	IP_IN	1.3385	0.950764
0.000195219	0.366152	0.091	0.106	1	DS_vs_CTL	GRIPAP1	0.00107825	TRUE	IP_IN	0.413191	0.527436
0.000195266	-0.443941	0.14	0.244	1	DS_vs_CTL	ADIPOR2	0.00107825	TRUE	IP_IN	1.38539	1.01289
0.000195843	-0.257383	0.049	0.096	1	DS_vs_CTL	UBE2V2	0.00108066	TRUE	IP_IN	0.407048	0.335068
0.000196224	0.372538	0.348	0.342	1	DS_vs_CTL	PABPN1	0.00108198	TRUE	IP_IN	1.6057	2.07367
0.000196695	1.38209	0.122	0.083	1	DS_vs_CTL	CACNB2	0.0010838	TRUE	IP_IN	0.341951	0.887142
0.000196854	-0.425379	0.159	0.267	1	DS_vs_CTL	MXD3	0.0010839	TRUE	IP_IN	1.33786	0.990687
0.000197275	2.55431	0.055	0.022	1	DS_vs_CTL	MCTP1	0.00108544	TRUE	IP_IN	0.065821	0.384935
0.000197707	-0.350466	0.177	0.285	1	DS_vs_CTL	ZRANB3	0.00108703	TRUE	IP_IN	1.64289	1.28306
0.000198096	0.130613	0.146	0.18	1	DS_vs_CTL	NUDCD3	0.00108839	FALSE	IP_IN	0.846973	0.921956
0.000198412	-0.302252	0.189	0.292	1	DS_vs_CTL	FUBP1	0.00108935	TRUE	IP_IN	1.4348	1.15812
0.000198721	0.0677983	0.299	0.359	1	DS_vs_CTL	NAP1L1	0.00109027	FALSE	IP_IN	1.91989	2.00695
0.000198866	0.184673	0.201	0.236	1	DS_vs_CTL	RNF216	0.00109028	FALSE	IP_IN	1.26367	1.43099
0.000199232	0.344097	0.128	0.17	1	DS_vs_CTL	BCOR	0.00109151	TRUE	IP_IN	0.862843	1.09011
0.000199595	0.632263	0.195	0.174	1	DS_vs_CTL	ABCC5	0.00109246	TRUE	IP_IN	0.755085	1.16544
0.000199753	0.161118	0.098	0.133	1	DS_vs_CTL	TLE3	0.00109246	FALSE	IP_IN	0.610426	0.677292
0.000199834	-0.0541195	0.579	0.704	1	DS_vs_CTL	PBRM1	0.00109246	FALSE	IP_IN	5.94259	5.71843
0.000200838	-0.501057	0.415	0.582	1	DS_vs_CTL	NCOA2	0.00109717	TRUE	IP_IN	4.51812	3.18688
0.00020125	-0.949315	0.055	0.142	1	DS_vs_CTL	HMGB3	0.00109864	TRUE	IP_IN	0.624312	0.317609
0.000201596	-0.116337	0.14	0.206	1	DS_vs_CTL	CDC7	0.00109974	FALSE	IP_IN	1.06314	0.97537
0.00020178	0.681476	0.201	0.17	1	DS_vs_CTL	TBC1D32	0.00109997	TRUE	IP_IN	0.835493	1.33505
0.000202469	0.626797	0.079	0.083	1	DS_vs_CTL	TTYH1	0.00110294	TRUE	IP_IN	0.310635	0.474723
0.000202839	-0.332001	0.128	0.217	1	DS_vs_CTL	YY1	0.00110389	TRUE	IP_IN	1.1864	0.937015
0.000203003	0.950987	0.25	0.164	1	DS_vs_CTL	ANKH	0.00110389	TRUE	IP_IN	0.849194	1.63701
0.000203075	0.60249	0.183	0.174	1	DS_vs_CTL	PACS2	0.00110389	TRUE	IP_IN	0.807811	1.22157
0.000204116	-0.255301	0.152	0.242	1	DS_vs_CTL	GAP43	0.00110876	TRUE	IP_IN	1.23006	1.02509
0.000204412	0.345322	0.049	0.065	1	DS_vs_CTL	PPP1R12C	0.00110958	TRUE	IP_IN	0.246034	0.307426
0.000204856	0.795882	0.134	0.105	1	DS_vs_CTL	RFC2	0.00111121	TRUE	IP_IN	0.495816	0.856011
0.000205123	-0.489374	0.091	0.188	1	DS_vs_CTL	GRM8	0.00111187	TRUE	IP_IN	1.54304	1.0936
0.000205416	-0.200635	0.104	0.165	1	DS_vs_CTL	LRP5	0.00111267	FALSE	IP_IN	0.794162	0.68561
0.000206988	-0.380836	0.11	0.187	1	DS_vs_CTL	IGF2R	0.00111974	TRUE	IP_IN	0.879989	0.670304
0.000207013	-0.26886	0.061	0.117	1	DS_vs_CTL	GFM2	0.00111974	TRUE	IP_IN	0.536838	0.440088
0.000207255	0.177039	0.244	0.291	1	DS_vs_CTL	RRM1	0.00111988	FALSE	IP_IN	1.68634	1.90126
0.000207331	1.84348	0.085	0.035	1	DS_vs_CTL	SYNGR1	0.00111988	TRUE	IP_IN	0.147159	0.524712
0.000207748	1.51345	0.122	0.062	1	DS_vs_CTL	CARMIL1	0.00112134	TRUE	IP_IN	0.29872	0.848865
0.000207954	0.26242	0.463	0.48	1	DS_vs_CTL	CTBP2	0.00112167	TRUE	IP_IN	3.18145	3.81091
0.000208603	2.08562	0.055	0.026	1	DS_vs_CTL	KLF3-AS1	0.00112438	TRUE	IP_IN	0.0850024	0.357889
0.000209013	-0.307807	0.226	0.334	1	DS_vs_CTL	KDM1A	0.00112561	TRUE	IP_IN	1.76542	1.42074
0.000209125	1.91313	0.073	0.032	1	DS_vs_CTL	TMEM106B	0.00112561	TRUE	IP_IN	0.118558	0.44325
0.000209332	0.107096	0.402	0.461	1	DS_vs_CTL	MELK	0.00112593	FALSE	IP_IN	2.9544	3.17677
0.000210537	-0.265398	0.073	0.126	1	DS_vs_CTL	PANX1	0.00113162	TRUE	IP_IN	0.597611	0.491721
0.000210865	0.0536345	0.14	0.186	1	DS_vs_CTL	CTPS2	0.00113217	FALSE	IP_IN	0.912692	0.941943
0.000210936	0.172154	0.061	0.089	1	DS_vs_CTL	RELL1	0.00113217	FALSE	IP_IN	0.417058	0.464663
0.000211264	0.273784	0.159	0.188	1	DS_vs_CTL	CUL4A	0.00113314	TRUE	IP_IN	0.904405	1.08821
0.000213543	-0.0984076	0.384	0.505	1	DS_vs_CTL	ERC1	0.00114456	FALSE	IP_IN	3.67444	3.42677
0.000214635	-0.660081	0.11	0.218	1	DS_vs_CTL	RPL23A	0.00114961	TRUE	IP_IN	1.09054	0.684518
0.000215504	0.679113	0.274	0.234	1	DS_vs_CTL	TULP3	0.00115347	TRUE	IP_IN	1.30069	2.07771
0.000216065	-0.672431	0.073	0.161	1	DS_vs_CTL	CLEC2D	0.00115566	TRUE	IP_IN	0.781928	0.484993
0.000216362	0.357601	0.585	0.555	1	DS_vs_CTL	PAFAH1B1	0.00115645	TRUE	IP_IN	3.8732	4.95758
0.000217055	0.155153	0.067	0.091	1	DS_vs_CTL	KAT7	0.00115934	FALSE	IP_IN	0.392547	0.431855
0.000217456	0.475344	0.098	0.107	1	DS_vs_CTL	KLHDC4	0.00116067	TRUE	IP_IN	0.491975	0.678915
0.000218333	-0.828219	0.043	0.116	1	DS_vs_CTL	RAB11B	0.00116405	TRUE	IP_IN	0.427061	0.234857
0.000218391	-0.547781	0.073	0.149	1	DS_vs_CTL	CTNNBL1	0.00116405	TRUE	IP_IN	0.698733	0.472399
0.000218661	0.62444	0.091	0.089	1	DS_vs_CTL	TAB1	0.00116467	TRUE	IP_IN	0.381464	0.58313
0.000220307	0.343266	0.22	0.225	1	DS_vs_CTL	ZNF84	0.00117262	TRUE	IP_IN	1.01806	1.28639
0.000220813	-0.113911	0.104	0.167	1	DS_vs_CTL	MORF4L2	0.0011745	FALSE	IP_IN	0.751944	0.689453
0.000221453	-0.176768	0.195	0.28	1	DS_vs_CTL	SPECC1	0.00117705	FALSE	IP_IN	1.47383	1.29844
0.000221683	0.594703	0.171	0.166	1	DS_vs_CTL	MICAL1	0.00117705	TRUE	IP_IN	0.680432	1.0226
0.000221752	-0.269795	0.091	0.153	1	DS_vs_CTL	ESD	0.00117705	TRUE	IP_IN	0.700672	0.575688
0.000222068	-0.856928	0.061	0.159	1	DS_vs_CTL	PRELID2	0.00117791	TRUE	IP_IN	1.00963	0.551762
0.000222459	0.682938	0.159	0.137	1	DS_vs_CTL	TCP11L1	0.00117917	TRUE	IP_IN	0.617849	0.987006
0.000222977	-0.0316178	0.354	0.442	1	DS_vs_CTL	RUFY3	0.0011811	FALSE	IP_IN	2.68939	2.62572
0.000223372	-1.07968	0.043	0.127	1	DS_vs_CTL	ZNF143	0.00118238	TRUE	IP_IN	0.617412	0.286376
0.00022419	1.80795	0.104	0.041	1	DS_vs_CTL	ANKFN1	0.00118589	TRUE	IP_IN	0.202086	0.704123
0.000224475	-0.152817	0.378	0.501	1	DS_vs_CTL	TNRC18	0.00118657	FALSE	IP_IN	3.17063	2.84653
0.000224667	-0.649714	0.061	0.131	1	DS_vs_CTL	ZNF492	0.00118677	TRUE	IP_IN	0.652172	0.41008
0.000225042	0.194733	0.433	0.482	1	DS_vs_CTL	PPP2R5E	0.00118794	FALSE	IP_IN	3.19057	3.64641
0.000226071	0.223288	0.5	0.561	1	DS_vs_CTL	CORO2B	0.00119255	FALSE	IP_IN	4.21615	4.91667
0.000228033	-0.268942	0.152	0.25	1	DS_vs_CTL	SRSF1	0.00120207	TRUE	IP_IN	1.12029	0.924283
0.000228579	0.956285	0.061	0.063	1	DS_vs_CTL	TMEM132A	0.00120348	TRUE	IP_IN	0.183556	0.351513
0.000228615	-2.83434	0.018	0.101	1	DS_vs_CTL	LINC01170	0.00120348	TRUE	IP_IN	0.786471	0.104278
0.000229123	0.179747	0.311	0.343	1	DS_vs_CTL	CASTOR3	0.00120533	FALSE	IP_IN	1.83815	2.0768
0.00022931	0.200073	0.207	0.236	1	DS_vs_CTL	HTT	0.00120549	FALSE	IP_IN	1.15888	1.32603
0.000229671	-0.530144	0.256	0.405	1	DS_vs_CTL	RPL7A	0.00120624	TRUE	IP_IN	2.33986	1.61474
0.000229768	-0.10762	0.14	0.195	1	DS_vs_CTL	CHM	0.00120624	FALSE	IP_IN	0.908982	0.838242
0.000230013	1.52304	0.098	0.053	1	DS_vs_CTL	TMEM184B	0.0012067	TRUE	IP_IN	0.225274	0.643488
0.000230228	0.130474	0.567	0.628	1	DS_vs_CTL	PHF14	0.00120701	FALSE	IP_IN	4.79562	5.24427
0.000231327	0.115446	0.116	0.149	1	DS_vs_CTL	SFI1	0.00121194	FALSE	IP_IN	0.704151	0.75753
0.000233693	0.607039	0.402	0.374	1	DS_vs_CTL	SLC8A1	0.0012235	TRUE	IP_IN	3.10095	4.71819
0.000234003	0.325175	0.201	0.221	1	DS_vs_CTL	PRKRIP1	0.00122429	TRUE	IP_IN	1.1204	1.3985
0.000234431	0.435533	0.128	0.133	1	DS_vs_CTL	NPLOC4	0.00122569	TRUE	IP_IN	0.607793	0.816903
0.000235508	-0.283184	0.104	0.168	1	DS_vs_CTL	MIGA1	0.00123048	TRUE	IP_IN	0.813073	0.662682
0.000236021	0.327563	0.329	0.332	1	DS_vs_CTL	DDX6	0.00123229	TRUE	IP_IN	1.81012	2.26635
0.000236188	0.663431	0.146	0.125	1	DS_vs_CTL	MTCH1	0.00123229	TRUE	IP_IN	0.519191	0.817409
0.000236336	-0.430683	0.146	0.253	1	DS_vs_CTL	VPS54	0.00123229	TRUE	IP_IN	1.35477	0.999576
0.00023654	0.908516	0.055	0.048	1	DS_vs_CTL	ZFAT	0.00123251	TRUE	IP_IN	0.189369	0.35078
0.000237174	-0.277341	0.146	0.239	1	DS_vs_CTL	FOXG1	0.00123498	TRUE	IP_IN	0.979714	0.802894
0.000237902	0.791763	0.11	0.1	1	DS_vs_CTL	ETFDH	0.00123793	TRUE	IP_IN	0.442718	0.761631
0.000238566	0.817195	0.189	0.143	1	DS_vs_CTL	TADA2A	0.00124055	TRUE	IP_IN	0.696619	1.22265
0.000239231	0.562226	0.122	0.115	1	DS_vs_CTL	WDR26	0.00124316	TRUE	IP_IN	0.511838	0.750762
0.000240534	0.0404107	0.085	0.127	1	DS_vs_CTL	MED23	0.00124908	FALSE	IP_IN	0.597925	0.609585
0.000241254	0.110144	0.451	0.516	1	DS_vs_CTL	R3HDM2	0.00125197	FALSE	IP_IN	3.59528	3.87523
0.000241883	-0.812073	0.134	0.265	1	DS_vs_CTL	HFM1	0.00125439	TRUE	IP_IN	1.57341	0.890485
0.000245605	-0.457274	0.293	0.445	1	DS_vs_CTL	GPR137C	0.00127283	TRUE	IP_IN	3.23524	2.35087
0.000245862	-0.214498	0.683	0.818	1	DS_vs_CTL	TMEM131L	0.0012733	FALSE	IP_IN	8.64743	7.44731
0.000246214	0.270984	0.213	0.242	1	DS_vs_CTL	TAB2	0.00127427	TRUE	IP_IN	1.31774	1.58483
0.000246653	-1.79172	0.03	0.122	1	DS_vs_CTL	STXBP3	0.00127568	TRUE	IP_IN	0.603877	0.168536
0.000247276	-0.0391625	0.372	0.457	1	DS_vs_CTL	CKB	0.00127804	FALSE	IP_IN	2.31384	2.24651
0.000248682	-0.360899	0.134	0.22	1	DS_vs_CTL	ANKLE2	0.00128444	TRUE	IP_IN	1.04603	0.809012
0.000250725	-0.159316	0.293	0.409	1	DS_vs_CTL	SMC5	0.00129412	FALSE	IP_IN	2.45627	2.19404
0.000251973	0.00334464	0.098	0.147	1	DS_vs_CTL	NNT-AS1	0.00129969	FALSE	IP_IN	0.764659	0.761089
0.000252897	0.306589	0.146	0.167	1	DS_vs_CTL	PRR14L	0.00130317	TRUE	IP_IN	0.834179	1.02653
0.000252988	0.322615	0.067	0.086	1	DS_vs_CTL	RNF146	0.00130317	TRUE	IP_IN	0.337664	0.417122
0.00025365	0.997871	0.079	0.064	1	DS_vs_CTL	SEC13	0.0013057	TRUE	IP_IN	0.28087	0.556314
0.000254418	0.269574	0.165	0.193	1	DS_vs_CTL	AC009120.2	0.00130878	TRUE	IP_IN	0.905743	1.08664
0.00025511	0.659559	0.189	0.167	1	DS_vs_CTL	DPY19L3	0.00131004	TRUE	IP_IN	0.76256	1.19963
0.00025518	1.11361	0.079	0.059	1	DS_vs_CTL	AAMP	0.00131004	TRUE	IP_IN	0.246644	0.529232
0.000255189	0.283614	0.122	0.153	1	DS_vs_CTL	VPS50	0.00131004	TRUE	IP_IN	0.75382	0.912397
0.000255346	-1.81499	0.018	0.091	1	DS_vs_CTL	PTTG1	0.00131004	TRUE	IP_IN	0.389848	0.104913
0.00025594	0.269972	0.341	0.362	1	DS_vs_CTL	COA1	0.00131221	TRUE	IP_IN	2.19789	2.64499
0.000256291	0.30188	0.085	0.104	1	DS_vs_CTL	REEP5	0.00131313	TRUE	IP_IN	0.480755	0.587478
0.000257647	1.11903	0.122	0.08	1	DS_vs_CTL	VPS26B	0.00131919	TRUE	IP_IN	0.335997	0.725323
0.000258419	-0.325152	0.165	0.265	1	DS_vs_CTL	NUTM2B-AS1	0.00132226	TRUE	IP_IN	1.43848	1.14272
0.000258597	-0.384948	0.037	0.087	1	DS_vs_CTL	ZNF92	0.00132229	TRUE	IP_IN	0.395286	0.29719
0.000258839	1.09597	0.091	0.071	1	DS_vs_CTL	NSA2	0.00132265	TRUE	IP_IN	0.326743	0.693944
0.000259524	-1.08388	0.03	0.099	1	DS_vs_CTL	SYNDIG1	0.00132526	TRUE	IP_IN	0.49556	0.228041
0.000260839	-0.503463	0.073	0.145	1	DS_vs_CTL	SIPA1L2	0.00133109	TRUE	IP_IN	0.694748	0.484516
0.000261969	0.467631	0.244	0.236	1	DS_vs_CTL	RAB1A	0.00133597	TRUE	IP_IN	1.13975	1.57102
0.000262392	-0.505951	0.671	0.798	1	DS_vs_CTL	PARD3	0.00133724	TRUE	IP_IN	9.50765	6.68968
0.00026283	-0.994943	0.061	0.155	1	DS_vs_CTL	TDG	0.00133824	TRUE	IP_IN	0.714803	0.352936
0.000262938	-0.0614457	0.226	0.303	1	DS_vs_CTL	RICTOR	0.00133824	FALSE	IP_IN	1.60297	1.53075
0.000264059	-1.61737	0.043	0.143	1	DS_vs_CTL	ZNF300	0.00134306	TRUE	IP_IN	0.669128	0.212236
0.000264497	-0.243551	0.348	0.473	1	DS_vs_CTL	NUP160	0.00134439	FALSE	IP_IN	2.89424	2.4392
0.000264687	0.0704451	0.128	0.173	1	DS_vs_CTL	TRAPPC12	0.00134447	FALSE	IP_IN	0.83473	0.871191
0.000266146	-0.0986637	0.262	0.347	1	DS_vs_CTL	RALGAPA1	0.00135098	FALSE	IP_IN	2.01128	1.87294
0.00026703	-0.269209	0.366	0.498	1	DS_vs_CTL	PDE7A	0.00135458	TRUE	IP_IN	3.13431	2.5953
0.000268575	0.331778	0.128	0.161	1	DS_vs_CTL	GDI1	0.00136152	TRUE	IP_IN	0.583097	0.728712
0.000269448	1.55231	0.055	0.045	1	DS_vs_CTL	UNC5C	0.00136504	TRUE	IP_IN	0.108863	0.315384
0.000270195	0.293852	0.067	0.086	1	DS_vs_CTL	SYNGAP1	0.00136722	TRUE	IP_IN	0.333149	0.403233
0.000270266	-0.834935	0.122	0.245	1	DS_vs_CTL	KLHL8	0.00136722	TRUE	IP_IN	1.40521	0.782094
0.000270413	-0.181694	0.067	0.116	1	DS_vs_CTL	RAD23A	0.00136722	FALSE	IP_IN	0.50352	0.438501
0.000271123	1.01567	0.085	0.064	1	DS_vs_CTL	AL353194.1	0.0013699	TRUE	IP_IN	0.275972	0.553392
0.000271749	0.30315	0.207	0.227	1	DS_vs_CTL	GKAP1	0.00137183	TRUE	IP_IN	1.16774	1.43562
0.00027189	1.03976	0.085	0.065	1	DS_vs_CTL	STK38L	0.00137183	TRUE	IP_IN	0.270985	0.552561
0.00027204	0.723487	0.116	0.102	1	DS_vs_CTL	GART	0.00137183	TRUE	IP_IN	0.486768	0.798878
0.000273437	-0.414083	0.134	0.228	1	DS_vs_CTL	PTPN13	0.00137796	TRUE	IP_IN	1.24401	0.928093
0.000273865	0.558252	0.311	0.287	1	DS_vs_CTL	HSP90AB1	0.00137922	TRUE	IP_IN	1.58771	2.33289
0.000274222	-0.544397	0.232	0.37	1	DS_vs_CTL	THOC2	0.00138011	TRUE	IP_IN	2.15902	1.47481
0.000275478	0.353442	0.22	0.231	1	DS_vs_CTL	TPM4	0.00138463	TRUE	IP_IN	1.11097	1.41424
0.000275482	-1.59523	0.024	0.101	1	DS_vs_CTL	RWDD1	0.00138463	TRUE	IP_IN	0.472498	0.150533
0.000276446	0.2702	0.091	0.117	1	DS_vs_CTL	ARL6IP4	0.00138692	TRUE	IP_IN	0.424477	0.506717
0.000276448	0.0464073	0.244	0.299	1	DS_vs_CTL	TLK2	0.00138692	FALSE	IP_IN	1.59767	1.64458
0.000276479	0.458491	0.085	0.102	1	DS_vs_CTL	PPDPF	0.00138692	TRUE	IP_IN	0.402083	0.547438
0.000276874	0.00421192	0.348	0.432	1	DS_vs_CTL	CSNK1A1	0.00138786	FALSE	IP_IN	2.4483	2.45012
0.000277029	-0.306314	0.628	0.777	1	DS_vs_CTL	CLASP2	0.00138786	TRUE	IP_IN	6.73993	5.44512
0.000279177	-0.599514	0.079	0.164	1	DS_vs_CTL	RPL27	0.00139695	TRUE	IP_IN	0.703114	0.458436
0.000279207	0.169678	0.256	0.299	1	DS_vs_CTL	RNF168	0.00139695	FALSE	IP_IN	1.64796	1.84839
0.000280695	-0.0842581	0.122	0.188	1	DS_vs_CTL	MFHAS1	0.0014032	FALSE	IP_IN	1.00663	0.944131
0.000280866	-0.80064	0.043	0.112	1	DS_vs_CTL	HCG18	0.0014032	TRUE	IP_IN	0.485143	0.272851
0.000281006	-0.268574	0.47	0.616	1	DS_vs_CTL	PDS5B	0.0014032	TRUE	IP_IN	4.78819	3.96939
0.000281507	-1.24392	0.098	0.224	1	DS_vs_CTL	SGO2	0.00140479	TRUE	IP_IN	1.20009	0.500925
0.000284943	1.25227	0.116	0.069	1	DS_vs_CTL	CNTFR	0.00142101	TRUE	IP_IN	0.25832	0.61105
0.000286517	0.123999	0.091	0.119	1	DS_vs_CTL	ZNF410	0.00142793	FALSE	IP_IN	0.551007	0.595182
0.000287149	-0.136406	0.213	0.294	1	DS_vs_CTL	PPP4R2	0.00143015	FALSE	IP_IN	1.61779	1.46642
0.000287478	-0.582491	0.104	0.198	1	DS_vs_CTL	RNF19A	0.00143086	TRUE	IP_IN	1.04946	0.695245
0.000290879	0.0804163	0.098	0.137	1	DS_vs_CTL	ADAR	0.00144685	FALSE	IP_IN	0.621576	0.651902
0.000291839	0.078617	0.207	0.265	1	DS_vs_CTL	CTNNB1	0.00145068	FALSE	IP_IN	1.39472	1.46753
0.000292955	-0.655916	0.03	0.086	1	DS_vs_CTL	LRP2BP	0.00145529	TRUE	IP_IN	0.411135	0.255315
0.000294212	0.539195	0.201	0.185	1	DS_vs_CTL	TOM1L2	0.00146009	TRUE	IP_IN	0.891251	1.29012
0.000294301	-0.177061	0.128	0.196	1	DS_vs_CTL	KIF5A	0.00146009	FALSE	IP_IN	0.907347	0.797118
0.000295381	1.37268	0.091	0.053	1	DS_vs_CTL	ZADH2	0.00146449	TRUE	IP_IN	0.221369	0.569084
0.000296911	-0.0276384	0.268	0.34	1	DS_vs_CTL	ATE1	0.00146945	FALSE	IP_IN	1.92882	1.88686
0.000297071	1.16997	0.098	0.075	1	DS_vs_CTL	DOK5	0.00146945	TRUE	IP_IN	0.27923	0.623878
0.000297123	0.570426	0.085	0.092	1	DS_vs_CTL	SEPTIN3	0.00146945	TRUE	IP_IN	0.367892	0.541323
0.000297147	0.892665	0.091	0.073	1	DS_vs_CTL	TGOLN2	0.00146945	TRUE	IP_IN	0.295416	0.543767
0.000298343	-0.234618	0.104	0.164	1	DS_vs_CTL	ERV3-1	0.00147441	FALSE	IP_IN	0.772676	0.651245
0.000298843	-0.012923	0.152	0.207	1	DS_vs_CTL	WASF1	0.00147593	FALSE	IP_IN	0.997476	0.983228
0.000299269	0.0339984	0.207	0.271	1	DS_vs_CTL	CCM2	0.00147709	FALSE	IP_IN	1.4741	1.50392
0.000299536	-0.368463	0.287	0.418	1	DS_vs_CTL	MTF2	0.00147746	TRUE	IP_IN	2.49947	1.93059
0.000299915	-0.935604	0.049	0.129	1	DS_vs_CTL	TYMS	0.00147764	TRUE	IP_IN	0.609338	0.312871
0.00029996	0.0176194	0.03	0.063	1	DS_vs_CTL	PLRG1	0.00147764	FALSE	IP_IN	0.259293	0.257142
0.000300843	-0.337719	0.287	0.414	1	DS_vs_CTL	CALM2	0.00148104	TRUE	IP_IN	2.23315	1.76157
0.000304387	-1.50897	0.03	0.119	1	DS_vs_CTL	ZNF266	0.00149737	TRUE	IP_IN	0.503658	0.171132
0.000304551	0.193645	0.165	0.197	1	DS_vs_CTL	AC011603.2	0.00149737	FALSE	IP_IN	1.05966	1.20664
0.000304913	-0.196242	0.341	0.46	1	DS_vs_CTL	AOPEP	0.00149819	FALSE	IP_IN	3.04925	2.65601
0.000305564	1.01195	0.104	0.075	1	DS_vs_CTL	NUS1	0.00150043	TRUE	IP_IN	0.334743	0.670469
0.000306641	0.779154	0.11	0.089	1	DS_vs_CTL	CCDC137	0.00150444	TRUE	IP_IN	0.418386	0.713194
0.000306772	0.40626	0.177	0.182	1	DS_vs_CTL	DDX50	0.00150444	TRUE	IP_IN	0.903074	1.19169
0.000307685	0.096098	0.207	0.271	1	DS_vs_CTL	MSRA	0.00150741	FALSE	IP_IN	1.67339	1.78335
0.000307907	0.378868	0.287	0.293	1	DS_vs_CTL	ANKRD26	0.00150741	TRUE	IP_IN	1.66438	2.15911
0.000307967	0.0868537	0.36	0.414	1	DS_vs_CTL	USP47	0.00150741	FALSE	IP_IN	2.44617	2.59266
0.000308742	-0.19249	0.39	0.502	1	DS_vs_CTL	HNRNPH1	0.00151018	FALSE	IP_IN	2.89089	2.52436
0.000308928	-0.606408	0.14	0.252	1	DS_vs_CTL	TIAL1	0.00151018	TRUE	IP_IN	1.19368	0.778439
0.000309194	-0.798181	0.049	0.119	1	DS_vs_CTL	LRRC37A3	0.00151052	TRUE	IP_IN	0.496428	0.279817
0.000309931	-0.0669005	0.354	0.453	1	DS_vs_CTL	IPO9	0.00151315	FALSE	IP_IN	2.67228	2.54581
0.000310126	-0.470323	0.165	0.279	1	DS_vs_CTL	PHF6	0.00151315	TRUE	IP_IN	1.43205	1.02811
0.000310813	0.00160017	0.085	0.136	1	DS_vs_CTL	MYL6B	0.00151488	FALSE	IP_IN	0.574309	0.5696
0.000310916	0.401213	0.427	0.399	1	DS_vs_CTL	C20orf194	0.00151488	TRUE	IP_IN	2.35255	3.10172
0.000311073	0.621663	0.177	0.164	1	DS_vs_CTL	NOS1AP	0.00151488	TRUE	IP_IN	0.811888	1.24427
0.000311499	0.715069	0.128	0.112	1	DS_vs_CTL	ABCF1	0.00151599	TRUE	IP_IN	0.514245	0.8393
0.000311777	-3.26485	0.006	0.072	1	DS_vs_CTL	FAM106A	0.00151638	TRUE	IP_IN	0.256497	0.0206655
0.000312948	0.0452936	0.476	0.562	1	DS_vs_CTL	TUBB	0.00152111	FALSE	IP_IN	3.4632	3.56833
0.000313379	0.858937	0.165	0.117	1	DS_vs_CTL	ZNF814	0.00152224	TRUE	IP_IN	0.534525	0.964732
0.000314093	0.977208	0.195	0.134	1	DS_vs_CTL	YES1	0.00152416	TRUE	IP_IN	0.715109	1.40318
0.000314171	0.509843	0.134	0.138	1	DS_vs_CTL	RANBP2	0.00152416	TRUE	IP_IN	0.618846	0.876143
0.000314596	-0.230049	0.067	0.122	1	DS_vs_CTL	HSPA9	0.00152525	FALSE	IP_IN	0.551537	0.464786
0.000315231	0.71062	0.116	0.118	1	DS_vs_CTL	AC068308.1	0.00152737	TRUE	IP_IN	0.561642	0.914262
0.000315564	0.970045	0.067	0.053	1	DS_vs_CTL	HECA	0.00152801	TRUE	IP_IN	0.223422	0.433035
0.000317346	-0.329601	0.091	0.157	1	DS_vs_CTL	MFSD14A	0.00153463	TRUE	IP_IN	0.730581	0.575865
0.000317374	0.135035	0.287	0.334	1	DS_vs_CTL	EPB41	0.00153463	FALSE	IP_IN	1.91839	2.10134
0.00031753	-0.46355	0.067	0.135	1	DS_vs_CTL	GCNT2	0.00153463	TRUE	IP_IN	0.64585	0.462817
0.000318198	0.233422	0.085	0.113	1	DS_vs_CTL	ZNF891	0.0015359	FALSE	IP_IN	0.525046	0.61204
0.000318304	0.653494	0.098	0.095	1	DS_vs_CTL	TAMM41	0.0015359	TRUE	IP_IN	0.416647	0.650458
0.000318498	1.20375	0.098	0.064	1	DS_vs_CTL	VPS9D1	0.0015359	TRUE	IP_IN	0.256209	0.585777
0.000318594	-0.241532	0.128	0.203	1	DS_vs_CTL	AP2B1	0.0015359	FALSE	IP_IN	0.972606	0.817213
0.000319346	-0.0783349	0.207	0.274	1	DS_vs_CTL	LIG1	0.00153856	FALSE	IP_IN	1.46733	1.3844
0.00032026	0.639732	0.341	0.291	1	DS_vs_CTL	TOX	0.00154199	TRUE	IP_IN	2.07139	3.22239
0.000320567	-1.61004	0.037	0.128	1	DS_vs_CTL	SP9	0.0015425	TRUE	IP_IN	0.59318	0.188468
0.000321064	-0.659412	0.189	0.324	1	DS_vs_CTL	MND1	0.00154392	TRUE	IP_IN	2.04504	1.28917
0.000321665	-0.348064	0.744	0.866	1	DS_vs_CTL	CERS6	0.00154548	TRUE	IP_IN	11.3323	8.89756
0.00032179	-1.08034	0.073	0.179	1	DS_vs_CTL	SUSD1	0.00154548	TRUE	IP_IN	0.934416	0.436158
0.000323789	0.0286005	0.396	0.484	1	DS_vs_CTL	ARID1A	0.00155411	FALSE	IP_IN	3.24597	3.30563
0.000324429	2.3783	0.061	0.02	1	DS_vs_CTL	COL4A5	0.00155621	TRUE	IP_IN	0.0847783	0.438587
0.000324937	-0.195726	0.323	0.435	1	DS_vs_CTL	YPEL1	0.00155767	FALSE	IP_IN	2.5554	2.22577
0.000325561	-0.520081	0.335	0.496	1	DS_vs_CTL	SOGA3	0.00155951	TRUE	IP_IN	3.21846	2.23876
0.000325727	0.0540321	0.079	0.108	1	DS_vs_CTL	DPY30	0.00155951	FALSE	IP_IN	0.477332	0.49023
0.000326657	0.575721	0.073	0.086	1	DS_vs_CTL	NAT9	0.00156298	TRUE	IP_IN	0.298792	0.440347
0.000326932	-0.775923	0.061	0.14	1	DS_vs_CTL	KIF2C	0.00156306	TRUE	IP_IN	0.696312	0.400998
0.000327369	-0.542419	0.201	0.328	1	DS_vs_CTL	MIR9-3HG	0.00156306	TRUE	IP_IN	1.64884	1.12654
0.000327407	0.320944	0.329	0.342	1	DS_vs_CTL	SRPK1	0.00156306	TRUE	IP_IN	1.94761	2.42769
0.000328099	-0.666553	0.073	0.161	1	DS_vs_CTL	KLHL2	0.00156306	TRUE	IP_IN	0.788651	0.491233
0.000328126	0.758261	0.177	0.146	1	DS_vs_CTL	VAV2	0.00156306	TRUE	IP_IN	0.656809	1.10613
0.000328401	0.389658	0.134	0.137	1	DS_vs_CTL	ZNF506	0.00156306	TRUE	IP_IN	0.610742	0.795009
0.000328425	0.566621	0.061	0.065	1	DS_vs_CTL	LINC02249	0.00156306	TRUE	IP_IN	0.283258	0.414534
0.000328495	0.254637	0.238	0.267	1	DS_vs_CTL	STAT5B	0.00156306	TRUE	IP_IN	1.44021	1.71302
0.000328507	0.272683	0.287	0.332	1	DS_vs_CTL	TTLL5	0.00156306	TRUE	IP_IN	1.95427	2.35567
0.000329606	-0.955458	0.049	0.128	1	DS_vs_CTL	RANBP1	0.00156732	TRUE	IP_IN	0.528106	0.266622
0.000330568	0.699156	0.14	0.122	1	DS_vs_CTL	SCAMP1	0.00157091	TRUE	IP_IN	0.561661	0.907009
0.000330952	0.528411	0.104	0.104	1	DS_vs_CTL	PKIG	0.00157177	TRUE	IP_IN	0.488659	0.699798
0.000332322	-1.13455	0.122	0.255	1	DS_vs_CTL	AL049828.1	0.0015769	TRUE	IP_IN	1.82448	0.825255
0.000332445	0.238513	0.329	0.362	1	DS_vs_CTL	ITCH	0.0015769	FALSE	IP_IN	2.01111	2.36745
0.000332998	-0.659971	0.055	0.122	1	DS_vs_CTL	MORC2	0.00157855	TRUE	IP_IN	0.55481	0.345512
0.000333595	-0.194073	0.561	0.703	1	DS_vs_CTL	MOB3B	0.0015804	FALSE	IP_IN	7.75606	6.77439
0.000335236	-1.63664	0.03	0.116	1	DS_vs_CTL	SOX1	0.0015872	TRUE	IP_IN	0.527266	0.163716
0.000336194	-0.502578	0.043	0.098	1	DS_vs_CTL	NUP43	0.00158929	TRUE	IP_IN	0.4579	0.317639
0.000336205	1.06368	0.061	0.052	1	DS_vs_CTL	POLR2E	0.00158929	TRUE	IP_IN	0.223722	0.463107
0.0003363	0.294304	0.262	0.273	1	DS_vs_CTL	UPF2	0.00158929	TRUE	IP_IN	1.4152	1.73027
0.000336681	0.416624	0.122	0.14	1	DS_vs_CTL	C1orf159	0.00159011	TRUE	IP_IN	0.706833	0.938386
0.000338534	0.0313475	0.183	0.243	1	DS_vs_CTL	STK38	0.00159788	FALSE	IP_IN	1.25335	1.27555
0.000339869	0.136961	0.232	0.279	1	DS_vs_CTL	PAPOLA	0.00160319	FALSE	IP_IN	1.37373	1.50526
0.000340783	-0.655508	0.073	0.153	1	DS_vs_CTL	STIM2	0.00160652	TRUE	IP_IN	0.751295	0.47134
0.000341888	0.667597	0.11	0.101	1	DS_vs_CTL	TUBGCP2	0.00161074	TRUE	IP_IN	0.442718	0.698319
0.000342866	0.341659	0.122	0.134	1	DS_vs_CTL	CYTH2	0.00161436	TRUE	IP_IN	0.549925	0.691726
0.0003446	-0.199018	0.238	0.33	1	DS_vs_CTL	NAA16	0.00162152	FALSE	IP_IN	1.79606	1.55918
0.000346676	-0.0460158	0.067	0.11	1	DS_vs_CTL	GMEB1	0.00163029	FALSE	IP_IN	0.528982	0.507005
0.000346979	-0.448798	0.232	0.361	1	DS_vs_CTL	LBR	0.00163072	TRUE	IP_IN	1.96246	1.43225
0.000347643	-0.295726	0.183	0.275	1	DS_vs_CTL	KIF5B	0.00163283	TRUE	IP_IN	1.45271	1.17798
0.000348144	-0.916472	0.11	0.229	1	DS_vs_CTL	AKNAD1	0.00163419	TRUE	IP_IN	1.17308	0.615799
0.000348431	0.761357	0.079	0.073	1	DS_vs_CTL	SHF	0.00163454	TRUE	IP_IN	0.294188	0.493848
0.000348937	0.26329	0.134	0.159	1	DS_vs_CTL	CLTA	0.00163591	TRUE	IP_IN	0.761298	0.908524
0.000349803	-0.356747	0.091	0.158	1	DS_vs_CTL	PRIMPOL	0.00163876	TRUE	IP_IN	0.745454	0.576631
0.000349973	0.193883	0.201	0.236	1	DS_vs_CTL	BEX3	0.00163876	FALSE	IP_IN	1.07214	1.22111
0.00035057	-0.372699	0.043	0.089	1	DS_vs_CTL	B2M	0.00164055	TRUE	IP_IN	0.364383	0.275908
0.000351297	0.403041	0.122	0.131	1	DS_vs_CTL	PKD1	0.00164295	TRUE	IP_IN	0.516821	0.678284
0.00035208	0.274276	0.494	0.515	1	DS_vs_CTL	SPECC1L	0.00164503	TRUE	IP_IN	3.52101	4.25308
0.000352268	-0.0897066	0.171	0.242	1	DS_vs_CTL	CNOT1	0.00164503	FALSE	IP_IN	1.20571	1.12763
0.000352383	0.285012	0.146	0.161	1	DS_vs_CTL	UQCRH	0.00164503	TRUE	IP_IN	0.680308	0.823719
0.000356077	-0.452813	0.061	0.125	1	DS_vs_CTL	GPI	0.00166126	TRUE	IP_IN	0.528448	0.380544
0.000358137	0.99607	0.152	0.108	1	DS_vs_CTL	GUCY1A2	0.00166816	TRUE	IP_IN	0.507035	1.00671
0.00035817	0.48553	0.061	0.074	1	DS_vs_CTL	UQCC2	0.00166816	TRUE	IP_IN	0.31366	0.434109
0.000358208	-1.23424	0.079	0.194	1	DS_vs_CTL	SRBD1	0.00166816	TRUE	IP_IN	1.04997	0.440527
0.000359012	-0.483623	0.03	0.082	1	DS_vs_CTL	PRKAR1A	0.00167089	TRUE	IP_IN	0.341025	0.238333
0.000359343	-2.32219	0.006	0.06	1	DS_vs_CTL	PLP2	0.00167141	TRUE	IP_IN	0.257751	0.0455934
0.000359819	0.243481	0.293	0.316	1	DS_vs_CTL	RTF1	0.00167261	FALSE	IP_IN	1.73452	2.0482
0.000361393	-0.0456105	0.183	0.254	1	DS_vs_CTL	RSRP1	0.00167891	FALSE	IP_IN	1.17216	1.13031
0.000362137	0.401716	0.061	0.074	1	DS_vs_CTL	PIGG	0.00168135	TRUE	IP_IN	0.302732	0.394827
0.000363418	1.28821	0.091	0.065	1	DS_vs_CTL	MFSD10	0.00168628	TRUE	IP_IN	0.174866	0.422802
0.000365223	0.298505	0.073	0.102	1	DS_vs_CTL	LINC00535	0.00169363	TRUE	IP_IN	0.530903	0.647767
0.000365689	1.01932	0.085	0.065	1	DS_vs_CTL	HDAC1	0.0016944	TRUE	IP_IN	0.273235	0.54926
0.00036583	-0.18453	0.494	0.628	1	DS_vs_CTL	GSK3B	0.0016944	FALSE	IP_IN	4.96481	4.36328
0.000366098	-0.314572	0.03	0.071	1	DS_vs_CTL	MPDU1	0.00169461	TRUE	IP_IN	0.308658	0.242694
0.000366989	-0.200936	0.165	0.24	1	DS_vs_CTL	FANCB	0.00169607	FALSE	IP_IN	1.24811	1.08039
0.000367025	-0.928205	0.098	0.219	1	DS_vs_CTL	CTNNA3	0.00169607	TRUE	IP_IN	1.43493	0.748369
0.00036724	-0.645244	0.03	0.086	1	DS_vs_CTL	PRDM4	0.00169607	TRUE	IP_IN	0.379879	0.237272
0.000367297	0.13112	0.311	0.357	1	DS_vs_CTL	DDX46	0.00169607	FALSE	IP_IN	2.05896	2.24958
0.000368638	-0.538263	0.293	0.447	1	DS_vs_CTL	CTDSPL2	0.00170124	TRUE	IP_IN	2.86875	1.96984
0.000369579	-0.758527	0.146	0.273	1	DS_vs_CTL	SLC38A1	0.00170455	TRUE	IP_IN	1.41804	0.832549
0.000370283	-0.0651555	0.152	0.215	1	DS_vs_CTL	PAIP2	0.00170677	FALSE	IP_IN	1.06629	1.01383
0.000370722	0.140116	0.28	0.327	1	DS_vs_CTL	FZD3	0.0017069	FALSE	IP_IN	1.71139	1.88067
0.000370755	0.137892	0.305	0.36	1	DS_vs_CTL	KIDINS220	0.0017069	FALSE	IP_IN	1.88036	2.06368
0.000372085	0.666139	0.146	0.122	1	DS_vs_CTL	GPRIN1	0.00171199	TRUE	IP_IN	0.561776	0.886533
0.000372392	-0.104431	0.268	0.364	1	DS_vs_CTL	ATP2C1	0.00171233	FALSE	IP_IN	1.93702	1.79637
0.000372606	-0.878267	0.116	0.236	1	DS_vs_CTL	IQCB1	0.00171233	TRUE	IP_IN	1.25613	0.677671
0.000376317	-0.869872	0.116	0.235	1	DS_vs_CTL	TAX1BP1	0.00172751	TRUE	IP_IN	1.25495	0.681014
0.000376395	0.239134	0.171	0.198	1	DS_vs_CTL	EIF3A	0.00172751	FALSE	IP_IN	0.944126	1.10913
0.000376584	-1.34128	0.067	0.178	1	DS_vs_CTL	ILDR2	0.00172751	TRUE	IP_IN	0.908774	0.352866
0.000377391	-1.01876	0.091	0.209	1	DS_vs_CTL	DLG3	0.00173018	TRUE	IP_IN	1.04878	0.511886
0.000377958	-0.00343789	0.22	0.277	1	DS_vs_CTL	BTAF1	0.00173175	FALSE	IP_IN	1.40842	1.39972
0.000379733	0.0675911	0.061	0.095	1	DS_vs_CTL	MKRN1	0.00173884	FALSE	IP_IN	0.402832	0.416843
0.000380131	0.808344	0.116	0.095	1	DS_vs_CTL	CLCN6	0.00173918	TRUE	IP_IN	0.41187	0.716484
0.000380404	0.192386	0.061	0.086	1	DS_vs_CTL	FGD1	0.00173918	FALSE	IP_IN	0.380216	0.429215
0.000380489	0.244972	0.14	0.161	1	DS_vs_CTL	KIAA0355	0.00173918	FALSE	IP_IN	0.761466	0.897182
0.000382592	-3.41423	0.006	0.071	1	DS_vs_CTL	LINC00877	0.00174776	TRUE	IP_IN	0.338341	0.02571
0.000382929	0.191603	0.146	0.172	1	DS_vs_CTL	ATL2	0.00174825	FALSE	IP_IN	0.80445	0.913468
0.000383237	-0.59561	0.159	0.276	1	DS_vs_CTL	ACADM	0.00174862	TRUE	IP_IN	1.50256	0.988742
0.00038369	0.148259	0.122	0.158	1	DS_vs_CTL	BRD1	0.00174964	FALSE	IP_IN	0.742109	0.817163
0.000384423	-0.06774	0.085	0.127	1	DS_vs_CTL	MDM2	0.00175195	FALSE	IP_IN	0.555127	0.524283
0.000385397	0.0279156	0.201	0.25	1	DS_vs_CTL	SPG7	0.00175534	FALSE	IP_IN	1.1637	1.18111
0.000386083	0.609019	0.104	0.101	1	DS_vs_CTL	TUBGCP5	0.00175663	TRUE	IP_IN	0.46843	0.709507
0.000386138	1.86498	0.073	0.031	1	DS_vs_CTL	IER2	0.00175663	TRUE	IP_IN	0.101318	0.365701
0.000386498	0.626494	0.061	0.067	1	DS_vs_CTL	ARRB2	0.00175723	TRUE	IP_IN	0.259199	0.395215
0.000387369	-1.553	0.012	0.07	1	DS_vs_CTL	PET100	0.00176014	TRUE	IP_IN	0.250708	0.0795996
0.000388279	0.746856	0.183	0.153	1	DS_vs_CTL	MAPK8IP3	0.00176213	TRUE	IP_IN	0.678201	1.13327
0.000388295	-0.0198151	0.177	0.237	1	DS_vs_CTL	MPDZ	0.00176213	FALSE	IP_IN	1.21888	1.19689
0.000388497	0.194145	0.055	0.077	1	DS_vs_CTL	PSMB5	0.00176213	FALSE	IP_IN	0.325256	0.36687
0.000389287	0.227907	0.354	0.389	1	DS_vs_CTL	VEZT	0.00176468	FALSE	IP_IN	2.24316	2.62183
0.000390416	-0.775199	0.037	0.097	1	DS_vs_CTL	PGRMC1	0.00176875	TRUE	IP_IN	0.401404	0.228885
0.000392158	-0.364929	0.128	0.215	1	DS_vs_CTL	RSPRY1	0.0017746	TRUE	IP_IN	1.04617	0.806844
0.000392171	-0.541819	0.11	0.201	1	DS_vs_CTL	ELP2	0.0017746	TRUE	IP_IN	1.01227	0.689749
0.000394057	-0.448716	0.152	0.255	1	DS_vs_CTL	WDR20	0.00178005	TRUE	IP_IN	1.32133	0.962587
0.000394068	0.0785333	0.128	0.167	1	DS_vs_CTL	TRAPPC11	0.00178005	FALSE	IP_IN	0.747125	0.783617
0.00039407	-0.609637	0.067	0.139	1	DS_vs_CTL	CNOT9	0.00178005	TRUE	IP_IN	0.644934	0.417059
0.000395233	-0.244762	0.159	0.239	1	DS_vs_CTL	ARHGEF9	0.00178425	FALSE	IP_IN	1.23017	1.03274
0.000398756	0.158707	0.195	0.227	1	DS_vs_CTL	MTREX	0.00179882	FALSE	IP_IN	1.19493	1.32862
0.000399034	0.15885	0.22	0.257	1	DS_vs_CTL	MCM10	0.00179882	FALSE	IP_IN	1.36807	1.52205
0.000399163	-0.513961	0.055	0.12	1	DS_vs_CTL	SPATA7	0.00179882	TRUE	IP_IN	0.554673	0.382864
0.000400195	-0.414614	0.201	0.322	1	DS_vs_CTL	E2F7	0.0018024	TRUE	IP_IN	1.78271	1.33189
0.000401597	0.390326	0.226	0.225	1	DS_vs_CTL	FOXK2	0.00180766	TRUE	IP_IN	1.1465	1.49759
0.000402778	-0.659567	0.104	0.199	1	DS_vs_CTL	PHGDH	0.00181191	TRUE	IP_IN	0.982338	0.616265
0.00040335	-0.476163	0.098	0.182	1	DS_vs_CTL	STMP1	0.00181342	TRUE	IP_IN	0.838853	0.597483
0.000405497	0.928941	0.134	0.111	1	DS_vs_CTL	KCND2	0.00182099	TRUE	IP_IN	0.39057	0.73893
0.000405508	-0.164209	0.183	0.259	1	DS_vs_CTL	SNAP25	0.00182099	FALSE	IP_IN	1.37934	1.22552
0.000406639	0.383216	0.28	0.296	1	DS_vs_CTL	RPL15	0.001825	TRUE	IP_IN	1.39549	1.81494
0.000408461	1.77836	0.098	0.04	1	DS_vs_CTL	TRPM3	0.00183166	TRUE	IP_IN	0.134936	0.459354
0.0004086	1.648	0.085	0.047	1	DS_vs_CTL	NEUROD6	0.00183166	TRUE	IP_IN	0.133907	0.415917
0.000409053	-0.50476	0.183	0.295	1	DS_vs_CTL	TMEM131	0.00183261	TRUE	IP_IN	1.55564	1.09081
0.000410542	0.313944	0.146	0.172	1	DS_vs_CTL	DDX24	0.00183821	TRUE	IP_IN	0.873454	1.08063
0.000410836	-0.303525	0.384	0.526	1	DS_vs_CTL	PSIP1	0.0018384	TRUE	IP_IN	3.23212	2.6134
0.000411239	0.377616	0.061	0.078	1	DS_vs_CTL	CAT	0.0018384	TRUE	IP_IN	0.314521	0.403501
0.000411302	-0.98255	0.067	0.163	1	DS_vs_CTL	NUP54	0.0018384	TRUE	IP_IN	0.799767	0.399032
0.000413767	-1.27888	0.043	0.132	1	DS_vs_CTL	TMSB15A	0.00184834	TRUE	IP_IN	0.582534	0.234283
0.000416061	1.09624	0.061	0.053	1	DS_vs_CTL	DISP3	0.0018575	TRUE	IP_IN	0.159337	0.336164
0.000416938	-0.26373	0.055	0.099	1	DS_vs_CTL	ZC3H4	0.00186033	TRUE	IP_IN	0.428813	0.351699
0.000419947	0.241767	0.171	0.197	1	DS_vs_CTL	SREK1	0.00187267	FALSE	IP_IN	0.942274	1.10897
0.000422101	-1.48244	0.018	0.083	1	DS_vs_CTL	SMAP2	0.00188118	TRUE	IP_IN	0.391395	0.134244
0.000422494	0.696964	0.201	0.161	1	DS_vs_CTL	MAP2K5	0.00188184	TRUE	IP_IN	0.803912	1.29833
0.000422983	0.247311	0.098	0.123	1	DS_vs_CTL	LSS	0.00188292	FALSE	IP_IN	0.471746	0.554752
0.000424599	0.739252	0.122	0.119	1	DS_vs_CTL	SELENOW	0.00188902	TRUE	IP_IN	0.477814	0.792776
0.000425148	1.59038	0.073	0.04	1	DS_vs_CTL	MGST1	0.00189037	TRUE	IP_IN	0.169811	0.507514
0.000427982	0.556377	0.171	0.158	1	DS_vs_CTL	TRAPPC10	0.00190186	TRUE	IP_IN	0.767663	1.12391
0.000428724	-0.0189769	0.152	0.206	1	DS_vs_CTL	SNX13	0.00190401	FALSE	IP_IN	1.04128	1.02231
0.000429012	-1.16485	0.024	0.086	1	DS_vs_CTL	KCTD13	0.00190401	TRUE	IP_IN	0.39021	0.168274
0.000429359	0.0720775	0.183	0.224	1	DS_vs_CTL	USP10	0.00190401	FALSE	IP_IN	1.10369	1.15493
0.000429457	-1.22611	0.012	0.056	1	DS_vs_CTL	ZNF136	0.00190401	TRUE	IP_IN	0.233204	0.0939108
0.000430376	-0.179216	0.177	0.25	1	DS_vs_CTL	PCBP2	0.00190698	FALSE	IP_IN	1.18598	1.04201
0.000433149	0.416279	0.067	0.083	1	DS_vs_CTL	ZBTB43	0.00191816	TRUE	IP_IN	0.372334	0.491777
0.000434394	0.993668	0.067	0.054	1	DS_vs_CTL	COX15	0.00192174	TRUE	IP_IN	0.254762	0.502689
0.000434666	0.756585	0.14	0.122	1	DS_vs_CTL	CRK	0.00192174	TRUE	IP_IN	0.587958	0.988517
0.000434708	0.515246	0.098	0.109	1	DS_vs_CTL	LMF1	0.00192174	TRUE	IP_IN	0.515214	0.73134
0.000436383	-0.704861	0.122	0.234	1	DS_vs_CTL	RHEB	0.00192803	TRUE	IP_IN	1.16137	0.706868
0.000436698	0.407255	0.25	0.25	1	DS_vs_CTL	CMC2	0.00192831	TRUE	IP_IN	1.32147	1.74738
0.000439314	2.18053	0.055	0.021	1	DS_vs_CTL	DENND3	0.00193874	TRUE	IP_IN	0.0732253	0.329251
0.000439957	-0.412717	0.732	0.846	1	DS_vs_CTL	BAZ2B	0.00194	TRUE	IP_IN	11.1099	8.34027
0.000440105	0.493587	0.226	0.216	1	DS_vs_CTL	TRNAU1AP	0.00194	TRUE	IP_IN	1.11278	1.56169
0.000441343	-0.419953	0.591	0.741	1	DS_vs_CTL	ZNF638	0.00194434	TRUE	IP_IN	6.36797	4.7542
0.000442026	0.223655	0.098	0.132	1	DS_vs_CTL	ATP6V1H	0.0019461	FALSE	IP_IN	0.61205	0.709463
0.000442249	-0.486773	0.152	0.257	1	DS_vs_CTL	NCK2	0.0019461	TRUE	IP_IN	1.33046	0.943883
0.000442601	1.42985	0.073	0.041	1	DS_vs_CTL	FTSJ1	0.00194653	TRUE	IP_IN	0.151002	0.402754
0.000444167	-0.233197	0.195	0.291	1	DS_vs_CTL	CENPV	0.0019523	FALSE	IP_IN	1.49437	1.26587
0.000444582	0.200747	0.238	0.267	1	DS_vs_CTL	GPR161	0.001953	FALSE	IP_IN	1.37468	1.57467
0.000446478	0.513968	0.073	0.079	1	DS_vs_CTL	DAZAP1	0.00196021	TRUE	IP_IN	0.303137	0.427846
0.000447292	0.556949	0.061	0.063	1	DS_vs_CTL	AL355488.1	0.00196266	TRUE	IP_IN	0.218076	0.315831
0.000448461	-0.219292	0.287	0.401	1	DS_vs_CTL	JAK1	0.00196667	FALSE	IP_IN	2.37466	2.03435
0.00044937	0.824293	0.134	0.115	1	DS_vs_CTL	OSBP2	0.00196953	TRUE	IP_IN	0.560946	0.98848
0.000450558	-0.640006	0.061	0.14	1	DS_vs_CTL	PDCD4	0.0019736	TRUE	IP_IN	0.607441	0.384185
0.000452367	0.0545173	0.348	0.425	1	DS_vs_CTL	DAAM1	0.0019804	FALSE	IP_IN	2.83014	2.93382
0.000454104	-0.630662	0.085	0.169	1	DS_vs_CTL	MPP5	0.00198607	TRUE	IP_IN	0.820458	0.524305
0.000454181	0.701526	0.226	0.178	1	DS_vs_CTL	REEP1	0.00198607	TRUE	IP_IN	0.920194	1.49157
0.000455523	-0.203184	0.104	0.166	1	DS_vs_CTL	AAMDC	0.00199019	FALSE	IP_IN	0.82396	0.710273
0.000455652	0.27564	0.11	0.129	1	DS_vs_CTL	UQCC1	0.00199019	TRUE	IP_IN	0.564276	0.677884
0.000455902	0.347503	0.189	0.2	1	DS_vs_CTL	ZNF146	0.00199019	TRUE	IP_IN	0.972669	1.23244
0.000457213	0.0139052	0.201	0.263	1	DS_vs_CTL	STXBP5	0.00199478	FALSE	IP_IN	1.32907	1.3366
0.000458264	-0.640358	0.049	0.117	1	DS_vs_CTL	PTPDC1	0.00199823	TRUE	IP_IN	0.567543	0.358493
0.000458576	-0.1071	0.116	0.17	1	DS_vs_CTL	EIF5	0.00199845	FALSE	IP_IN	0.786978	0.725271
0.000459965	0.864812	0.073	0.068	1	DS_vs_CTL	TLCD3B	0.00200337	TRUE	IP_IN	0.235983	0.425019
0.000461349	-0.843999	0.104	0.217	1	DS_vs_CTL	TTC14	0.00200826	TRUE	IP_IN	1.02617	0.565999
0.000461982	0.320659	0.098	0.113	1	DS_vs_CTL	CNTROB	0.00200987	TRUE	IP_IN	0.480265	0.594643
0.000462857	1.14486	0.091	0.063	1	DS_vs_CTL	MIR137HG	0.0020112	TRUE	IP_IN	0.278859	0.612189
0.00046308	-0.42235	0.28	0.423	1	DS_vs_CTL	FBXW7	0.0020112	TRUE	IP_IN	2.6454	1.96848
0.000463324	-1.80287	0.024	0.105	1	DS_vs_CTL	PHF10	0.0020112	TRUE	IP_IN	0.438278	0.11973
0.000463336	-0.0425855	0.11	0.158	1	DS_vs_CTL	PANK3	0.0020112	FALSE	IP_IN	0.668641	0.643823
0.000463843	-0.0590411	0.354	0.446	1	DS_vs_CTL	CCNH	0.00201146	FALSE	IP_IN	2.91657	2.79424
0.000464187	0.190377	0.073	0.095	1	DS_vs_CTL	A2ML1-AS1	0.00201146	FALSE	IP_IN	0.434954	0.491069
0.00046426	-0.331181	0.335	0.471	1	DS_vs_CTL	CHD6	0.00201146	TRUE	IP_IN	3.00499	2.38312
0.000464446	-0.668176	0.299	0.456	1	DS_vs_CTL	PIP5K1B	0.00201146	TRUE	IP_IN	3.749	2.35363
0.000466686	0.322323	0.146	0.158	1	DS_vs_CTL	MPZL1	0.00202002	TRUE	IP_IN	0.802727	0.998524
0.000468919	-0.028608	0.024	0.05	1	DS_vs_CTL	IFNGR1	0.00202854	FALSE	IP_IN	0.216864	0.207245
0.000469573	0.24442	0.104	0.128	1	DS_vs_CTL	AC087564.1	0.00203023	FALSE	IP_IN	0.703707	0.828415
0.000470953	0.678827	0.085	0.078	1	DS_vs_CTL	LSM2	0.00203304	TRUE	IP_IN	0.334015	0.529808
0.000470964	1.75448	0.091	0.041	1	DS_vs_CTL	SYT17	0.00203304	TRUE	IP_IN	0.226573	0.760905
0.000471019	0.120455	0.268	0.316	1	DS_vs_CTL	RBBP6	0.00203304	FALSE	IP_IN	1.64186	1.77955
0.000472714	-1.11876	0.128	0.258	1	DS_vs_CTL	WLS	0.00203921	TRUE	IP_IN	1.49207	0.681333
0.000473401	-0.0333078	0.226	0.309	1	DS_vs_CTL	PTGES3	0.00204102	FALSE	IP_IN	1.74534	1.70014
0.000474264	-0.189245	0.146	0.223	1	DS_vs_CTL	FANCD2	0.00204352	FALSE	IP_IN	1.17466	1.02481
0.000474512	0.456628	0.195	0.194	1	DS_vs_CTL	DOP1A	0.00204352	TRUE	IP_IN	0.942448	1.28828
0.000475024	-0.110889	0.189	0.261	1	DS_vs_CTL	CCDC66	0.00204458	FALSE	IP_IN	1.31235	1.20986
0.000475916	1.11368	0.134	0.095	1	DS_vs_CTL	ATP6V0C	0.00204726	TRUE	IP_IN	0.363108	0.781283
0.000477928	-0.187878	0.207	0.294	1	DS_vs_CTL	BUB1B	0.00205477	FALSE	IP_IN	1.6053	1.40385
0.000482811	-0.341671	0.213	0.321	1	DS_vs_CTL	TBCK	0.0020746	TRUE	IP_IN	1.80065	1.41544
0.000487307	0.213722	0.628	0.655	1	DS_vs_CTL	RTN4	0.00209275	FALSE	IP_IN	4.96903	5.75724
0.00048848	0.0526441	0.232	0.297	1	DS_vs_CTL	KPNA3	0.00209661	FALSE	IP_IN	1.78085	1.84171
0.000489151	1.09241	0.085	0.067	1	DS_vs_CTL	NLN	0.00209831	TRUE	IP_IN	0.307932	0.652109
0.000490787	-0.186289	0.159	0.249	1	DS_vs_CTL	TSBP1-AS1	0.00210416	FALSE	IP_IN	1.61028	1.40978
0.000492007	0.0151345	0.213	0.27	1	DS_vs_CTL	NSRP1	0.00210821	FALSE	IP_IN	1.41048	1.42002
0.000492745	0.0133656	0.36	0.438	1	DS_vs_CTL	KATNBL1	0.00211019	FALSE	IP_IN	2.66465	2.68411
0.000493039	0.056454	0.329	0.398	1	DS_vs_CTL	TOP1	0.00211027	FALSE	IP_IN	2.34859	2.437
0.000494064	-1.08497	0.085	0.197	1	DS_vs_CTL	RCOR3	0.00211243	TRUE	IP_IN	0.957999	0.445858
0.000494094	-0.808231	0.049	0.119	1	DS_vs_CTL	TMTC3	0.00211243	TRUE	IP_IN	0.549691	0.30825
0.000494482	0.650258	0.195	0.161	1	DS_vs_CTL	PALM	0.00211291	TRUE	IP_IN	0.743365	1.16175
0.000495177	-0.613147	0.122	0.224	1	DS_vs_CTL	SPOPL	0.00211471	TRUE	IP_IN	1.16131	0.753619
0.000495561	0.160268	0.335	0.392	1	DS_vs_CTL	ZNF254	0.00211516	FALSE	IP_IN	2.23654	2.49406
0.000495864	-0.844792	0.037	0.101	1	DS_vs_CTL	DNAJC5	0.00211528	TRUE	IP_IN	0.473214	0.257802
0.000497034	0.516801	0.073	0.084	1	DS_vs_CTL	SAMD8	0.0021191	TRUE	IP_IN	0.358512	0.507927
0.000498502	-0.746971	0.085	0.179	1	DS_vs_CTL	DLGAP5	0.00212417	TRUE	IP_IN	0.903378	0.53263
0.000499855	0.482276	0.159	0.156	1	DS_vs_CTL	METTL9	0.00212876	TRUE	IP_IN	0.738303	1.02632
0.000500519	-0.523404	0.085	0.159	1	DS_vs_CTL	SLC35F5	0.0021304	TRUE	IP_IN	0.702827	0.483401
0.000505708	-0.471254	0.085	0.161	1	DS_vs_CTL	RESF1	0.00215129	TRUE	IP_IN	0.788483	0.563206
0.000508399	0.119565	0.079	0.114	1	DS_vs_CTL	PCF11	0.00216035	FALSE	IP_IN	0.516402	0.555741
0.0005084	-0.191265	0.384	0.508	1	DS_vs_CTL	WAC	0.00216035	FALSE	IP_IN	3.26947	2.85809
0.000513558	0.745611	0.079	0.074	1	DS_vs_CTL	MTG2	0.00218106	TRUE	IP_IN	0.354621	0.589748
0.000514794	-0.245049	0.25	0.356	1	DS_vs_CTL	SRSF5	0.0021851	FALSE	IP_IN	1.78559	1.50119
0.000515892	-0.522805	0.171	0.285	1	DS_vs_CTL	ATP9B	0.00218751	TRUE	IP_IN	1.54261	1.06811
0.000515932	0.599114	0.165	0.149	1	DS_vs_CTL	DROSHA	0.00218751	TRUE	IP_IN	0.686856	1.03548
0.000519506	0.278105	0.262	0.292	1	DS_vs_CTL	REV3L	0.00220144	TRUE	IP_IN	1.63857	1.98175
0.000520725	-0.568783	0.226	0.357	1	DS_vs_CTL	RPL28	0.00220539	TRUE	IP_IN	1.94306	1.30439
0.000521195	1.13736	0.128	0.082	1	DS_vs_CTL	SEC61B	0.00220612	TRUE	IP_IN	0.361729	0.791278
0.000521472	-0.425878	0.177	0.285	1	DS_vs_CTL	TTF2	0.00220612	TRUE	IP_IN	1.52007	1.12598
0.000523595	1.18723	0.134	0.076	1	DS_vs_CTL	CPSF2	0.00221388	TRUE	IP_IN	0.365756	0.828494
0.00052434	0.0739564	0.415	0.477	1	DS_vs_CTL	ARIH1	0.0022158	FALSE	IP_IN	3.0529	3.20818
0.000526133	0.451949	0.073	0.081	1	DS_vs_CTL	C1orf52	0.00222216	TRUE	IP_IN	0.31936	0.431778
0.000526931	0.308103	0.055	0.071	1	DS_vs_CTL	RTCA	0.0022243	TRUE	IP_IN	0.284964	0.34764
0.000528218	1.06952	0.116	0.08	1	DS_vs_CTL	MAP6	0.00222851	TRUE	IP_IN	0.299241	0.623505
0.000529413	-0.076313	0.098	0.147	1	DS_vs_CTL	NPAT	0.00223232	FALSE	IP_IN	0.691493	0.650481
0.000530243	0.350609	0.305	0.308	1	DS_vs_CTL	ALDH7A1	0.00223352	TRUE	IP_IN	1.67138	2.12604
0.000530451	0.583817	0.165	0.145	1	DS_vs_CTL	UBE2G2	0.00223352	TRUE	IP_IN	0.686962	1.02465
0.000530623	-0.356524	0.549	0.701	1	DS_vs_CTL	CDK14	0.00223352	TRUE	IP_IN	6.47606	5.05258
0.000530946	-0.294981	0.171	0.27	1	DS_vs_CTL	CCDC91	0.00223352	TRUE	IP_IN	1.6195	1.31454
0.000531153	0.723654	0.067	0.074	1	DS_vs_CTL	CCS	0.00223352	TRUE	IP_IN	0.269182	0.439659
0.0005317	0.122694	0.378	0.429	1	DS_vs_CTL	YEATS2	0.0022346	FALSE	IP_IN	2.60949	2.83584
0.000533372	1.7437	0.073	0.035	1	DS_vs_CTL	BMPR1B	0.0022404	TRUE	IP_IN	0.141612	0.470663
0.000534534	-0.166998	0.104	0.157	1	DS_vs_CTL	CDC5L	0.00224405	FALSE	IP_IN	0.799305	0.706508
0.000535973	-0.179012	0.457	0.589	1	DS_vs_CTL	SRSF10	0.00224886	FALSE	IP_IN	4.07492	3.59397
0.000538111	0.18	0.409	0.431	1	DS_vs_CTL	DENND4C	0.00225659	FALSE	IP_IN	2.55754	2.89215
0.00053908	0.435541	0.274	0.27	1	DS_vs_CTL	TET1	0.00225942	TRUE	IP_IN	1.57521	2.12527
0.000539627	0.448859	0.165	0.161	1	DS_vs_CTL	DDHD2	0.00226048	TRUE	IP_IN	0.750064	1.01874
0.000540962	0.448609	0.177	0.191	1	DS_vs_CTL	SESN1	0.00226483	TRUE	IP_IN	1.07839	1.46663
0.000541677	0.329105	0.11	0.131	1	DS_vs_CTL	IPO9-AS1	0.00226659	TRUE	IP_IN	0.656009	0.818946
0.000542562	0.018319	0.171	0.227	1	DS_vs_CTL	TP53BP1	0.00226906	FALSE	IP_IN	1.14602	1.15533
0.000543831	0.461604	0.226	0.213	1	DS_vs_CTL	LRRFIP1	0.00227313	TRUE	IP_IN	1.07667	1.47759
0.000544808	-0.586726	0.037	0.089	1	DS_vs_CTL	COX16	0.00227597	TRUE	IP_IN	0.395833	0.257968
0.000545401	0.222312	0.317	0.352	1	DS_vs_CTL	PRKACB	0.00227668	FALSE	IP_IN	2.06366	2.40225
0.000545782	-0.759033	0.22	0.366	1	DS_vs_CTL	FANCL	0.00227668	TRUE	IP_IN	2.15712	1.26897
0.000545969	-0.341311	0.049	0.095	1	DS_vs_CTL	MLEC	0.00227668	TRUE	IP_IN	0.418026	0.324453
0.000546346	-0.00689303	0.159	0.215	1	DS_vs_CTL	EZH1	0.00227668	FALSE	IP_IN	1.04519	1.03486
0.000546463	0.138335	0.591	0.66	1	DS_vs_CTL	CTNND2	0.00227668	FALSE	IP_IN	5.70636	6.27534
0.000548812	-0.548667	0.116	0.212	1	DS_vs_CTL	ZXDC	0.00228523	TRUE	IP_IN	1.04562	0.709256
0.000551399	2.09461	0.061	0.022	1	DS_vs_CTL	MRPS18B	0.00229461	TRUE	IP_IN	0.0863263	0.365819
0.000551663	0.0145245	0.238	0.306	1	DS_vs_CTL	KIF18B	0.00229461	FALSE	IP_IN	1.74021	1.75248
0.000552321	0.346035	0.311	0.307	1	DS_vs_CTL	PRIM1	0.00229488	TRUE	IP_IN	1.75642	2.22737
0.000552326	0.382113	0.079	0.093	1	DS_vs_CTL	SRFBP1	0.00229488	TRUE	IP_IN	0.459475	0.593691
0.000555749	0.587373	0.226	0.191	1	DS_vs_CTL	EXOC7	0.0023073	TRUE	IP_IN	0.837036	1.25268
0.000555919	0.34918	0.091	0.104	1	DS_vs_CTL	VPS39	0.0023073	TRUE	IP_IN	0.461951	0.583309
0.000556402	0.0607414	0.226	0.282	1	DS_vs_CTL	THOC1	0.00230806	FALSE	IP_IN	1.53005	1.59053
0.000556999	-0.213997	0.305	0.441	1	DS_vs_CTL	MKLN1	0.00230929	FALSE	IP_IN	2.78975	2.39972
0.000558502	-0.369936	0.098	0.182	1	DS_vs_CTL	N4BP1	0.00231427	TRUE	IP_IN	0.952374	0.731446
0.000560398	0.411581	0.335	0.318	1	DS_vs_CTL	FSD1L	0.00232087	TRUE	IP_IN	1.68114	2.23106
0.000563505	0.317877	0.25	0.266	1	DS_vs_CTL	MAST1	0.00233248	TRUE	IP_IN	1.34346	1.66946
0.000565223	-0.686663	0.14	0.258	1	DS_vs_CTL	KDM5A	0.00233833	TRUE	IP_IN	1.32183	0.815609
0.000566084	-0.182014	0.201	0.286	1	DS_vs_CTL	EPB41L5	0.00233996	FALSE	IP_IN	1.49088	1.30874
0.000566463	0.139851	0.104	0.137	1	DS_vs_CTL	ZNF709	0.00233996	FALSE	IP_IN	0.651185	0.712199
0.000566534	0.342832	0.134	0.148	1	DS_vs_CTL	ARPP19	0.00233996	TRUE	IP_IN	0.685598	0.86436
0.000568246	-1.676	0.024	0.1	1	DS_vs_CTL	MPHOSPH10	0.00234462	TRUE	IP_IN	0.457436	0.137292
0.000568272	-0.686834	0.067	0.148	1	DS_vs_CTL	CCNL1	0.00234462	TRUE	IP_IN	0.658119	0.403203
0.000569142	-0.32325	0.177	0.273	1	DS_vs_CTL	RAPH1	0.00234695	TRUE	IP_IN	1.42962	1.13715
0.000569639	-0.277237	0.402	0.538	1	DS_vs_CTL	ASAP2	0.00234773	TRUE	IP_IN	3.75443	3.09256
0.000570765	-0.583214	0.177	0.299	1	DS_vs_CTL	SEC63	0.00235061	TRUE	IP_IN	1.58401	1.05169
0.000570951	0.337302	0.128	0.139	1	DS_vs_CTL	RPS6KB1	0.00235061	TRUE	IP_IN	0.614062	0.770651
0.000572263	0.358578	0.073	0.085	1	DS_vs_CTL	HDGFL2	0.00235475	TRUE	IP_IN	0.330989	0.419246
0.000572568	0.540098	0.055	0.06	1	DS_vs_CTL	GTF3C3	0.00235475	TRUE	IP_IN	0.245697	0.352255
0.000573913	1.607	0.079	0.041	1	DS_vs_CTL	FBLN7	0.00235869	TRUE	IP_IN	0.19095	0.577859
0.000574143	-1.1945	0.134	0.256	1	DS_vs_CTL	CHSY3	0.00235869	TRUE	IP_IN	1.8722	0.812267
0.000580852	2.17076	0.079	0.021	1	DS_vs_CTL	SLCO3A1	0.00238497	TRUE	IP_IN	0.0823958	0.368278
0.00058202	-0.241127	0.177	0.262	1	DS_vs_CTL	MPRIP	0.00238799	FALSE	IP_IN	1.23225	1.03712
0.000582209	-0.0288783	0.104	0.146	1	DS_vs_CTL	TRIT1	0.00238799	FALSE	IP_IN	0.696869	0.677696
0.000582688	-0.464929	0.183	0.295	1	DS_vs_CTL	CHEK1	0.00238868	TRUE	IP_IN	1.61724	1.16615
0.000584406	-0.542647	0.244	0.38	1	DS_vs_CTL	DLX1	0.00239444	TRUE	IP_IN	2.10461	1.43926
0.000585303	0.4274	0.183	0.182	1	DS_vs_CTL	WEE1	0.00239567	TRUE	IP_IN	0.902027	1.20796
0.000585331	-0.10474	0.067	0.112	1	DS_vs_CTL	C11orf54	0.00239567	FALSE	IP_IN	0.506702	0.46582
0.00058673	-0.64715	0.049	0.113	1	DS_vs_CTL	MBNL3	0.00240012	TRUE	IP_IN	0.628676	0.395817
0.000587633	0.259924	0.037	0.06	1	DS_vs_CTL	ATOX1	0.00240232	TRUE	IP_IN	0.255375	0.300592
0.000587895	-0.0621833	0.244	0.313	1	DS_vs_CTL	MDM4	0.00240232	FALSE	IP_IN	1.54592	1.47533
0.000592002	-0.111852	0.146	0.215	1	DS_vs_CTL	RHOT1	0.0024172	FALSE	IP_IN	1.05385	0.969827
0.000592167	0.813529	0.116	0.093	1	DS_vs_CTL	BCCIP	0.0024172	TRUE	IP_IN	0.413744	0.722379
0.000593024	1.96428	0.073	0.025	1	DS_vs_CTL	AC092574.2	0.00241941	TRUE	IP_IN	0.0998634	0.386518
0.000594318	-0.178443	0.055	0.098	1	DS_vs_CTL	IAH1	0.0024234	FALSE	IP_IN	0.430526	0.375003
0.000594634	0.458311	0.085	0.095	1	DS_vs_CTL	MCCC1	0.0024234	TRUE	IP_IN	0.43523	0.592911
0.00059871	0.348607	0.689	0.639	1	DS_vs_CTL	AL589740.1	0.00243872	TRUE	IP_IN	10.5337	13.4077
0.000600123	0.389943	0.177	0.184	1	DS_vs_CTL	EFR3B	0.00244318	TRUE	IP_IN	0.855965	1.11649
0.000601056	0.617214	0.293	0.247	1	DS_vs_CTL	STOX2	0.00244568	TRUE	IP_IN	1.41742	2.16926
0.000601599	0.172657	0.22	0.254	1	DS_vs_CTL	APPBP2	0.00244659	FALSE	IP_IN	1.31482	1.47672
0.000603043	-0.19786	0.506	0.635	1	DS_vs_CTL	KIF1B	0.00245116	FALSE	IP_IN	4.85649	4.22866
0.00060403	0.394124	0.061	0.072	1	DS_vs_CTL	SHPK	0.00245387	TRUE	IP_IN	0.333446	0.433085
0.000605233	0.8272	0.152	0.128	1	DS_vs_CTL	PODXL2	0.00245702	TRUE	IP_IN	0.453181	0.799285
0.000605445	0.238663	0.195	0.22	1	DS_vs_CTL	SNX1	0.00245702	FALSE	IP_IN	1.10118	1.29406
0.000605894	-1.38441	0.043	0.131	1	DS_vs_CTL	AC097534.2	0.00245754	TRUE	IP_IN	0.582734	0.217404
0.000607776	0.41135	0.085	0.101	1	DS_vs_CTL	TMCO1	0.00246321	TRUE	IP_IN	0.468194	0.617566
0.000608437	0.335212	0.055	0.074	1	DS_vs_CTL	UBE2A	0.00246321	TRUE	IP_IN	0.28948	0.360047
0.000608548	0.32344	0.39	0.389	1	DS_vs_CTL	ACACA	0.00246321	TRUE	IP_IN	2.32518	2.90436
0.000608576	2.18389	0.055	0.021	1	DS_vs_CTL	HSD11B1L	0.00246321	TRUE	IP_IN	0.0687352	0.309631
0.000611977	1.0441	0.177	0.123	1	DS_vs_CTL	WARS2-AS1	0.00247424	TRUE	IP_IN	0.681553	1.40087
0.000612082	0.158347	0.067	0.095	1	DS_vs_CTL	SMIM4	0.00247424	FALSE	IP_IN	0.447488	0.49414
0.00061227	0.761582	0.104	0.092	1	DS_vs_CTL	SSR1	0.00247424	TRUE	IP_IN	0.397703	0.66942
0.000612635	0.366178	0.073	0.095	1	DS_vs_CTL	TRAPPC6B	0.00247441	TRUE	IP_IN	0.440102	0.562132
0.000613563	0.242699	0.079	0.103	1	DS_vs_CTL	INTS11	0.00247686	FALSE	IP_IN	0.379651	0.443996
0.00061542	-0.783551	0.055	0.129	1	DS_vs_CTL	RAP2A	0.0024824	TRUE	IP_IN	0.629217	0.359873
0.000615583	0.260887	0.104	0.125	1	DS_vs_CTL	NAE1	0.0024824	TRUE	IP_IN	0.556574	0.661698
0.000618825	0.121081	0.549	0.62	1	DS_vs_CTL	RTN3	0.00249416	FALSE	IP_IN	4.70713	5.11396
0.00061958	0.0936394	0.055	0.08	1	DS_vs_CTL	COX10	0.00249485	FALSE	IP_IN	0.344329	0.362122
0.000619647	-0.203882	0.201	0.303	1	DS_vs_CTL	ZKSCAN1	0.00249485	FALSE	IP_IN	1.66722	1.44205
0.000620087	0.643897	0.11	0.103	1	DS_vs_CTL	CCDC130	0.00249531	TRUE	IP_IN	0.422533	0.655302
0.000620895	0.393565	0.238	0.233	1	DS_vs_CTL	EPCAM-DT	0.00249725	TRUE	IP_IN	1.24039	1.62431
0.000621395	0.342708	0.317	0.316	1	DS_vs_CTL	HAT1	0.00249795	TRUE	IP_IN	1.84372	2.33295
0.000622796	1.16137	0.055	0.047	1	DS_vs_CTL	TNK2	0.00250228	TRUE	IP_IN	0.147898	0.326383
0.000625193	0.374002	0.402	0.385	1	DS_vs_CTL	CCNI	0.00250966	TRUE	IP_IN	2.13451	2.76108
0.000625289	-0.57353	0.061	0.134	1	DS_vs_CTL	TFG	0.00250966	TRUE	IP_IN	0.578196	0.382937
0.000627162	0.29063	0.207	0.227	1	DS_vs_CTL	RCN2	0.00251587	TRUE	IP_IN	1.15135	1.40313
0.000628442	-0.348346	0.36	0.505	1	DS_vs_CTL	PPM1L	0.00251968	TRUE	IP_IN	3.97482	3.11665
0.000629087	-0.631817	0.201	0.333	1	DS_vs_CTL	RIC8B	0.00251974	TRUE	IP_IN	1.97757	1.27064
0.000629114	-0.0987763	0.189	0.257	1	DS_vs_CTL	USP24	0.00251974	FALSE	IP_IN	1.29756	1.2063
0.000632332	0.733164	0.116	0.106	1	DS_vs_CTL	BCL2L13	0.00253131	TRUE	IP_IN	0.501808	0.829296
0.000636341	0.0793861	0.14	0.186	1	DS_vs_CTL	CLSTN1	0.00254559	FALSE	IP_IN	0.908096	0.954161
0.000636565	-0.674211	0.073	0.155	1	DS_vs_CTL	KIF18A	0.00254559	TRUE	IP_IN	0.770385	0.477154
0.000636906	-0.19509	0.366	0.482	1	DS_vs_CTL	CHD2	0.00254563	FALSE	IP_IN	3.10273	2.70485
0.000637861	0.633337	0.067	0.062	1	DS_vs_CTL	RNF40	0.00254812	TRUE	IP_IN	0.256372	0.392738
0.00063965	-0.741323	0.293	0.446	1	DS_vs_CTL	DEPDC1B	0.00255394	TRUE	IP_IN	2.9339	1.74938
0.000640298	-0.133729	0.171	0.237	1	DS_vs_CTL	REV1	0.0025552	FALSE	IP_IN	1.1574	1.04953
0.00064147	0.879473	0.128	0.09	1	DS_vs_CTL	RRAGB	0.00255854	TRUE	IP_IN	0.408139	0.746138
0.00064667	0.220764	0.116	0.14	1	DS_vs_CTL	MTA1	0.00257716	FALSE	IP_IN	0.529484	0.611812
0.000646809	-0.591206	0.116	0.221	1	DS_vs_CTL	RAB30-DT	0.00257716	TRUE	IP_IN	1.08092	0.711903
0.000647239	-0.822742	0.037	0.095	1	DS_vs_CTL	NES	0.00257753	TRUE	IP_IN	0.406431	0.22411
0.000648084	-0.0103405	0.128	0.176	1	DS_vs_CTL	GLS	0.00257906	FALSE	IP_IN	0.799494	0.788432
0.000648294	0.786932	0.104	0.084	1	DS_vs_CTL	SF3A3	0.00257906	TRUE	IP_IN	0.372368	0.637681
0.000648646	0.324193	0.28	0.291	1	DS_vs_CTL	RPS6KC1	0.00257912	TRUE	IP_IN	1.70691	2.13183
0.000649771	-0.358145	0.659	0.796	1	DS_vs_CTL	CHD9	0.00258225	TRUE	IP_IN	8.2858	6.4588
0.000651461	0.0155008	0.098	0.135	1	DS_vs_CTL	USP16	0.00258763	FALSE	IP_IN	0.639832	0.641405
0.000652275	0.640044	0.116	0.105	1	DS_vs_CTL	LONRF1	0.00258952	TRUE	IP_IN	0.473565	0.733066
0.000653428	-1.01425	0.067	0.162	1	DS_vs_CTL	ARHGEF26	0.00259276	TRUE	IP_IN	0.863591	0.421826
0.000654241	0.110729	0.366	0.426	1	DS_vs_CTL	GNG4	0.00259358	FALSE	IP_IN	2.85391	3.0763
0.000654313	-1.95038	0.037	0.125	1	DS_vs_CTL	H2AFX	0.00259358	TRUE	IP_IN	0.61238	0.152548
0.000655251	0.206946	0.348	0.38	1	DS_vs_CTL	UBTD2	0.00259596	FALSE	IP_IN	2.23861	2.57867
0.00066103	-0.0362522	0.585	0.699	1	DS_vs_CTL	KIF21A	0.00261655	FALSE	IP_IN	5.73524	5.58755
0.000661131	-0.954331	0.067	0.162	1	DS_vs_CTL	NEDD4	0.00261655	TRUE	IP_IN	0.8895	0.453344
0.000662215	0.29363	0.104	0.126	1	DS_vs_CTL	ARNT	0.00261949	TRUE	IP_IN	0.612345	0.745386
0.000663106	1.02405	0.073	0.059	1	DS_vs_CTL	BSCL2	0.00262166	TRUE	IP_IN	0.235307	0.473954
0.000663713	0.786608	0.25	0.185	1	DS_vs_CTL	ANO6	0.00262271	TRUE	IP_IN	1.05838	1.82091
0.000665826	-0.635667	0.091	0.181	1	DS_vs_CTL	KBTBD2	0.0026297	TRUE	IP_IN	0.860455	0.548212
0.000666376	0.379692	0.232	0.254	1	DS_vs_CTL	KIAA1549L	0.00262976	TRUE	IP_IN	1.39915	1.81526
0.000666526	0.619702	0.354	0.278	1	DS_vs_CTL	PLCB4	0.00262976	TRUE	IP_IN	1.74219	2.67203
0.00066751	0.111187	0.037	0.059	1	DS_vs_CTL	ATXN7L3B	0.00263229	FALSE	IP_IN	0.232243	0.245563
0.000670088	-0.369642	0.213	0.333	1	DS_vs_CTL	CHST11	0.0026411	TRUE	IP_IN	2.3185	1.78895
0.000671771	-1.0441	0.055	0.141	1	DS_vs_CTL	AKIRIN2	0.00264637	TRUE	IP_IN	0.67457	0.321398
0.000672117	0.863614	0.055	0.046	1	DS_vs_CTL	AP001318.2	0.00264637	TRUE	IP_IN	0.202655	0.364018
0.000673396	0.223279	0.055	0.075	1	DS_vs_CTL	SRC	0.00265005	FALSE	IP_IN	0.303976	0.349635
0.000675125	0.29634	0.146	0.166	1	DS_vs_CTL	VPS36	0.00265475	TRUE	IP_IN	0.795313	0.97149
0.000675281	-0.436182	0.152	0.254	1	DS_vs_CTL	FAM107B	0.00265475	TRUE	IP_IN	1.39292	1.02395
0.000679077	-0.349597	0.11	0.185	1	DS_vs_CTL	CCDC15	0.0026683	TRUE	IP_IN	0.955723	0.744546
0.000679452	0.00205283	0.146	0.196	1	DS_vs_CTL	RAP1A	0.00266841	FALSE	IP_IN	1.00295	0.999029
0.000681262	0.965492	0.067	0.059	1	DS_vs_CTL	B3GAT3	0.00267415	TRUE	IP_IN	0.207065	0.399711
0.000683006	-0.0617474	0.165	0.218	1	DS_vs_CTL	CD47	0.0026773	FALSE	IP_IN	1.06953	1.01934
0.000683427	0.064053	0.683	0.764	1	DS_vs_CTL	MAP4K4	0.0026773	FALSE	IP_IN	7.09362	7.41034
0.000683452	0.348637	0.341	0.356	1	DS_vs_CTL	DENND2A	0.0026773	TRUE	IP_IN	2.24321	2.85127
0.000683463	0.277266	0.043	0.067	1	DS_vs_CTL	PLEKHJ1	0.0026773	TRUE	IP_IN	0.18469	0.218637
0.000684204	-0.0235336	0.195	0.258	1	DS_vs_CTL	PLXNC1	0.00267884	FALSE	IP_IN	1.41533	1.38707
0.000684851	0.527985	0.091	0.095	1	DS_vs_CTL	IL17RD	0.00267934	TRUE	IP_IN	0.426206	0.609537
0.00068503	0.652917	0.055	0.064	1	DS_vs_CTL	VPS72	0.00267934	TRUE	IP_IN	0.308428	0.480037
0.000686559	-0.176469	0.098	0.154	1	DS_vs_CTL	VPS41	0.00268241	FALSE	IP_IN	0.69154	0.606487
0.000686836	0.213135	0.116	0.137	1	DS_vs_CTL	ARPC2	0.00268241	FALSE	IP_IN	0.591789	0.680777
0.000686865	-0.678879	0.116	0.218	1	DS_vs_CTL	PWWP2A	0.00268241	TRUE	IP_IN	1.10617	0.685343
0.000687225	-0.632808	0.098	0.191	1	DS_vs_CTL	MZT2B	0.00268245	TRUE	IP_IN	0.833891	0.53218
0.000687953	0.334258	0.152	0.162	1	DS_vs_CTL	ZNF251	0.00268393	TRUE	IP_IN	0.760123	0.953158
0.000690357	-0.394382	0.262	0.39	1	DS_vs_CTL	USP3	0.00269194	TRUE	IP_IN	2.2791	1.72845
0.000691748	0.0785779	0.134	0.171	1	DS_vs_CTL	YY1AP1	0.00269599	FALSE	IP_IN	0.766026	0.803601
0.00069275	0.400901	0.146	0.167	1	DS_vs_CTL	BNIP3L	0.00269852	TRUE	IP_IN	0.838382	1.10184
0.000694225	0.591163	0.189	0.18	1	DS_vs_CTL	MAGED1	0.00270184	TRUE	IP_IN	0.898359	1.34838
0.000694307	0.536678	0.11	0.11	1	DS_vs_CTL	ZNF333	0.00270184	TRUE	IP_IN	0.492744	0.70978
0.000695778	-0.397955	0.488	0.641	1	DS_vs_CTL	TMPO	0.0027062	TRUE	IP_IN	5.13928	3.89484
0.000698281	0.495585	0.128	0.131	1	DS_vs_CTL	AHCYL1	0.00271455	TRUE	IP_IN	0.585757	0.820816
0.000699064	1.47327	0.098	0.059	1	DS_vs_CTL	ARL8A	0.00271622	TRUE	IP_IN	0.23961	0.661265
0.000700101	0.945366	0.061	0.053	1	DS_vs_CTL	TAB3	0.00271887	TRUE	IP_IN	0.219842	0.418694
0.000703402	0.466653	0.159	0.168	1	DS_vs_CTL	ZHX3	0.00273031	TRUE	IP_IN	0.86878	1.19551
0.000708875	-1.02576	0.037	0.109	1	DS_vs_CTL	JKAMP	0.00275016	TRUE	IP_IN	0.509554	0.24454
0.000711998	-0.292102	0.159	0.248	1	DS_vs_CTL	RPL17	0.00276088	TRUE	IP_IN	1.14131	0.926638
0.000712817	0.902327	0.055	0.049	1	DS_vs_CTL	TONSL	0.00276266	TRUE	IP_IN	0.212408	0.392312
0.000714334	-0.164483	0.159	0.224	1	DS_vs_CTL	ACIN1	0.00276518	FALSE	IP_IN	1.09577	0.972275
0.000714422	-0.691409	0.067	0.143	1	DS_vs_CTL	C16orf87	0.00276518	TRUE	IP_IN	0.70816	0.432894
0.000714548	-0.253319	0.427	0.564	1	DS_vs_CTL	AHI1	0.00276518	TRUE	IP_IN	4.58099	3.83782
0.000718036	-0.620263	0.201	0.336	1	DS_vs_CTL	NYAP2	0.00277723	TRUE	IP_IN	2.49674	1.61865
0.000718572	0.220113	0.061	0.09	1	DS_vs_CTL	CPEB4	0.00277723	FALSE	IP_IN	0.372944	0.429191
0.000718851	0.0757304	0.244	0.3	1	DS_vs_CTL	BBX	0.00277723	FALSE	IP_IN	1.74201	1.83058
0.000719111	0.0180946	0.085	0.12	1	DS_vs_CTL	SH3PXD2A	0.00277723	FALSE	IP_IN	0.569838	0.571693
0.000719868	0.712734	0.201	0.171	1	DS_vs_CTL	CADPS	0.00277876	TRUE	IP_IN	0.756554	1.23505
0.000720721	-0.170128	0.36	0.466	1	DS_vs_CTL	ZNF83	0.00278065	FALSE	IP_IN	2.95713	2.62276
0.000722004	0.218842	0.159	0.178	1	DS_vs_CTL	NAPEPLD	0.0027842	FALSE	IP_IN	0.863007	0.999143
0.000724635	0.819965	0.195	0.14	1	DS_vs_CTL	ABHD2	0.00279294	TRUE	IP_IN	0.660923	1.162
0.000727341	0.571995	0.232	0.205	1	DS_vs_CTL	WDR7	0.00280196	TRUE	IP_IN	1.03955	1.54039
0.000728622	0.215697	0.177	0.201	1	DS_vs_CTL	ZMYM5	0.00280549	FALSE	IP_IN	1.04763	1.21135
0.000731313	-0.835932	0.14	0.264	1	DS_vs_CTL	IGF2BP1	0.00281444	TRUE	IP_IN	1.40768	0.782934
0.00073168	0.954157	0.171	0.119	1	DS_vs_CTL	CPEB3	0.00281444	TRUE	IP_IN	0.594162	1.14652
0.000732473	-0.410847	0.11	0.187	1	DS_vs_CTL	RNPS1	0.00281607	TRUE	IP_IN	0.873275	0.651329
0.000732971	0.517047	0.128	0.138	1	DS_vs_CTL	APEX1	0.0028161	TRUE	IP_IN	0.534819	0.760316
0.000733214	-0.0135146	0.085	0.124	1	DS_vs_CTL	SSR2	0.0028161	FALSE	IP_IN	0.515139	0.504983
0.000734237	0.400336	0.207	0.22	1	DS_vs_CTL	PHYHIPL	0.00281862	TRUE	IP_IN	1.24516	1.63828
0.000735408	-0.0970849	0.067	0.103	1	DS_vs_CTL	GGH	0.00282152	FALSE	IP_IN	0.464826	0.429179
[truncated: 5,671 more rows]

## Sheet: vRG
p_val	avg_log2FC	pct.1	pct.2	p_val_adj	comparison	gene	FDR	sig	celltype	exp.2	exp.1
9.52578e-117	0.801891	1	0.991	2.53452e-112	DS_vs_CTL	MIR99AHG	8.55225e-113	TRUE	vRG	45.7087	79.6886
2.17567e-88	1.80331	0.724	0.397	5.78881e-84	DS_vs_CTL	FOS	9.76659e-85	TRUE	vRG	2.5556	8.92217
8.26155e-86	2.80333	0.477	0.09	2.19815e-81	DS_vs_CTL	XIST	2.47241e-82	TRUE	vRG	0.797503	5.5732
3.75957e-70	1.71424	0.795	0.596	1.00031e-65	DS_vs_CTL	H3F3B	8.43836e-67	TRUE	vRG	4.7704	15.6552
1.03831e-51	1.70877	0.519	0.24	2.76262e-47	DS_vs_CTL	EGR1	1.86438e-48	TRUE	vRG	1.16241	3.80208
4.28595e-45	-1.30046	0.136	0.408	1.14036e-40	DS_vs_CTL	UTY	6.41322e-42	TRUE	vRG	2.09161	0.848593
2.38572e-38	2.20899	0.305	0.12	6.34768e-34	DS_vs_CTL	AP001172.1	3.05985e-35	TRUE	vRG	0.468737	2.17099
7.32637e-37	0.561946	0.959	0.816	1.94933e-32	DS_vs_CTL	SNTG1	8.22202e-34	TRUE	vRG	23.0431	34.0181
3.96467e-35	0.72524	0.897	0.794	1.05488e-30	DS_vs_CTL	NCAM2	3.95498e-32	TRUE	vRG	9.63833	15.9346
1.40531e-34	-1.281	0.195	0.457	3.7391e-30	DS_vs_CTL	TTTY14	1.26168e-31	TRUE	vRG	3.29466	1.3552
6.61707e-34	1.03697	0.571	0.475	1.7606e-29	DS_vs_CTL	JUN	5.40073e-31	TRUE	vRG	2.81991	5.78733
1.80914e-32	-1.18679	0.164	0.402	4.81358e-28	DS_vs_CTL	NLGN4Y	1.35354e-29	TRUE	vRG	2.4965	1.0961
6.50085e-32	1.6536	0.396	0.193	1.72968e-27	DS_vs_CTL	IER2	4.48959e-29	TRUE	vRG	0.922984	2.90612
1.3653e-31	1.79145	0.34	0.197	3.63265e-27	DS_vs_CTL	LUCAT1	8.75546e-29	TRUE	vRG	0.962033	3.33278
2.4416e-31	-1.06292	0.108	0.301	6.49637e-27	DS_vs_CTL	USP9Y	1.46138e-28	TRUE	vRG	1.30784	0.6255
1.11884e-30	-1.41253	0.065	0.239	2.97689e-26	DS_vs_CTL	RPS4Y1	6.27808e-28	TRUE	vRG	0.976249	0.366108
7.20713e-30	1.55354	0.379	0.176	1.9176e-25	DS_vs_CTL	PCSK6	3.80621e-27	TRUE	vRG	1.02477	3.01009
8.10966e-30	-1.74345	0.091	0.293	2.15774e-25	DS_vs_CTL	RPS26	4.04492e-27	TRUE	vRG	1.26169	0.376107
1.7609e-29	2.95508	0.188	0.048	4.68522e-25	DS_vs_CTL	FOSB	8.32071e-27	TRUE	vRG	0.18837	1.4678
5.27005e-29	-1.05044	0.328	0.575	1.4022e-24	DS_vs_CTL	SFRP1	2.36573e-26	TRUE	vRG	4.50916	2.17661
1.26547e-28	0.772534	0.669	0.557	3.36705e-24	DS_vs_CTL	SON	5.4102e-26	TRUE	vRG	3.14573	5.37451
6.70019e-28	0.857231	0.706	0.564	1.78272e-23	DS_vs_CTL	CCN1	2.73429e-25	TRUE	vRG	5.14649	9.32403
4.08352e-27	0.766475	0.811	0.7	1.0865e-22	DS_vs_CTL	TTC3	1.59399e-24	TRUE	vRG	5.60807	9.54069
6.52976e-27	0.925707	0.573	0.513	1.73737e-22	DS_vs_CTL	ELP4	2.44267e-24	TRUE	vRG	3.22936	6.13549
2.19777e-25	-1.59122	0.102	0.29	5.8476e-21	DS_vs_CTL	RPS25	7.89262e-23	TRUE	vRG	1.15607	0.383023
2.80974e-25	1.03436	0.494	0.348	7.47587e-21	DS_vs_CTL	FOXP2	9.70224e-23	TRUE	vRG	1.89756	3.88771
7.16986e-25	-0.619523	0.239	0.446	1.90769e-20	DS_vs_CTL	RPS15	2.38411e-22	TRUE	vRG	1.93149	1.25685
3.18781e-24	-1.71891	0.15	0.333	8.48181e-20	DS_vs_CTL	SEMA5A	1.02215e-21	TRUE	vRG	3.69225	1.12093
5.10002e-24	5.155	0.093	0.003	1.35696e-19	DS_vs_CTL	TSIX	1.5789e-21	TRUE	vRG	0.0107433	0.418726
2.78029e-23	-0.941856	0.258	0.478	7.39751e-19	DS_vs_CTL	RPS23	8.32047e-21	TRUE	vRG	2.34408	1.21977
2.98491e-23	1.04291	0.379	0.174	7.94195e-19	DS_vs_CTL	UNC5D	8.64468e-21	TRUE	vRG	1.38116	2.84685
5.48357e-23	-0.915931	0.313	0.537	1.45901e-18	DS_vs_CTL	H3F3A	1.53848e-20	TRUE	vRG	2.89139	1.53198
2.57934e-22	-3.34843	0.034	0.155	6.86284e-18	DS_vs_CTL	HSPA1B	7.01736e-20	TRUE	vRG	2.05589	0.200936
6.13615e-22	-2.66567	0.044	0.166	1.63265e-17	DS_vs_CTL	NTN1	1.62031e-19	TRUE	vRG	1.95033	0.30652
9.61372e-22	-0.812778	0.273	0.488	2.55792e-17	DS_vs_CTL	FAM182B	2.46606e-19	TRUE	vRG	2.95457	1.68157
2.33274e-21	0.455986	0.897	0.868	6.20673e-17	DS_vs_CTL	NCKAP5	5.8176e-19	TRUE	vRG	12.7666	17.5126
3.14403e-21	2.71872	0.146	0.036	8.36532e-17	DS_vs_CTL	AC013727.2	7.62895e-19	TRUE	vRG	0.139178	0.922006
7.12636e-21	-3.57898	0.051	0.16	1.89611e-16	DS_vs_CTL	HSPA1A	1.6837e-18	TRUE	vRG	3.31222	0.27624
1.00118e-20	1.89	0.227	0.092	2.66385e-16	DS_vs_CTL	NR4A1	2.30478e-18	TRUE	vRG	0.506656	1.88068
1.05417e-20	-0.621799	0.216	0.398	2.80483e-16	DS_vs_CTL	RPS13	2.36608e-18	TRUE	vRG	1.75829	1.14231
2.51526e-20	-0.877418	0.214	0.409	6.69236e-16	DS_vs_CTL	RPS15A	5.50782e-18	TRUE	vRG	1.7634	0.959445
5.95155e-20	-0.58852	0.387	0.599	1.58353e-15	DS_vs_CTL	TMSB4X	1.27221e-17	TRUE	vRG	3.02579	2.01191
7.80888e-20	0.214587	0.977	0.873	2.07771e-15	DS_vs_CTL	LINC01965	1.63042e-17	FALSE	vRG	41.0876	47.6771
1.0009e-19	-1.9529	0.021	0.119	2.66309e-15	DS_vs_CTL	DDX3Y	2.04228e-17	TRUE	vRG	0.363934	0.093259
1.04121e-19	-0.327187	0.321	0.502	2.77036e-15	DS_vs_CTL	GAPDH	2.07734e-17	TRUE	vRG	2.21455	1.76501
1.64354e-19	-0.732984	0.381	0.589	4.37296e-15	DS_vs_CTL	RPL11	3.20776e-17	TRUE	vRG	3.42335	2.0593
3.05293e-19	0.460487	0.935	0.865	8.12293e-15	DS_vs_CTL	CASC15	5.83175e-17	TRUE	vRG	13.1946	18.1562
3.48965e-19	1.91572	0.242	0.116	9.28491e-15	DS_vs_CTL	SATB2	6.5271e-17	TRUE	vRG	0.273741	1.03573
3.85888e-19	2.87672	0.13	0.026	1.02673e-14	DS_vs_CTL	AL138689.2	6.94575e-17	TRUE	vRG	0.111653	0.826672
3.86821e-19	-0.922278	0.288	0.491	1.02921e-14	DS_vs_CTL	SOX2	6.94575e-17	TRUE	vRG	2.99017	1.57738
5.16639e-19	-0.912061	0.407	0.604	1.37462e-14	DS_vs_CTL	PTMA	9.09487e-17	TRUE	vRG	3.86753	2.05485
8.54134e-19	-1.38436	0.503	0.66	2.27259e-14	DS_vs_CTL	HSP90AA1	1.4747e-16	TRUE	vRG	8.36417	3.20336
1.03064e-18	-2.37263	0.016	0.109	2.74223e-14	DS_vs_CTL	VEGFA	1.73263e-16	TRUE	vRG	0.346699	0.0661334
1.04213e-18	2.4893	0.152	0.049	2.77278e-14	DS_vs_CTL	VCAN-AS1	1.73263e-16	TRUE	vRG	0.188507	1.06329
1.6614e-18	0.889224	0.589	0.444	4.42048e-14	DS_vs_CTL	KIF26B	2.71201e-16	TRUE	vRG	4.7111	8.7267
1.94468e-18	-0.760759	0.324	0.525	5.17422e-14	DS_vs_CTL	RPL41	3.11774e-16	TRUE	vRG	2.84774	1.68029
2.1591e-18	-1.00395	0.291	0.488	5.74471e-14	DS_vs_CTL	RPS27A	3.40077e-16	TRUE	vRG	2.75113	1.37131
4.1132e-18	-0.51196	0.361	0.559	1.0944e-13	DS_vs_CTL	RPL13	6.36695e-16	TRUE	vRG	2.90331	2.03572
7.47673e-18	1.03004	0.304	0.227	1.98933e-13	DS_vs_CTL	MCL1	1.13773e-15	TRUE	vRG	0.935486	1.91145
1.12712e-17	-2.59231	0.031	0.138	2.99892e-13	DS_vs_CTL	THSD4	1.68654e-15	TRUE	vRG	1.41153	0.233221
1.23205e-17	0.7955	0.556	0.406	3.27813e-13	DS_vs_CTL	PDE9A	1.81334e-15	TRUE	vRG	2.20303	3.82454
2.32236e-17	-0.54433	0.112	0.229	6.1791e-13	DS_vs_CTL	TPI1	3.36293e-15	TRUE	vRG	0.798927	0.547531
3.50817e-17	-1.64721	0.063	0.19	9.33419e-13	DS_vs_CTL	FGFBP3	4.99942e-15	TRUE	vRG	0.929371	0.296027
3.67606e-17	1.821	0.184	0.065	9.7809e-13	DS_vs_CTL	AP000962.1	5.15683e-15	TRUE	vRG	0.255867	0.906698
3.93936e-17	0.798641	0.45	0.364	1.04814e-12	DS_vs_CTL	ZFP36L1	5.3738e-15	TRUE	vRG	1.9816	3.44771
3.95045e-17	0.409972	0.917	0.805	1.0511e-12	DS_vs_CTL	LTBP1	5.3738e-15	TRUE	vRG	13.4837	17.9157
8.6938e-17	-1.22028	0.053	0.161	2.31316e-12	DS_vs_CTL	HMGB2	1.16497e-14	TRUE	vRG	0.46631	0.199573
8.87473e-17	-1.18389	0.161	0.326	2.3613e-12	DS_vs_CTL	RPS28	1.17173e-14	TRUE	vRG	1.39002	0.611282
1.02595e-16	1.73549	0.195	0.086	2.72975e-12	DS_vs_CTL	IQCN	1.32722e-14	TRUE	vRG	0.335871	1.12087
1.03481e-16	1.07481	0.265	0.193	2.75332e-12	DS_vs_CTL	ZBTB20-AS5	1.32722e-14	TRUE	vRG	0.758667	1.59927
1.07015e-16	-1.52056	0.176	0.329	2.84734e-12	DS_vs_CTL	PLXDC2	1.35321e-14	TRUE	vRG	2.87068	0.999928
1.71384e-16	-0.774961	0.236	0.415	4.56002e-12	DS_vs_CTL	RPS19	2.13707e-14	TRUE	vRG	1.8599	1.08653
1.8093e-16	-0.529407	0.741	0.849	4.81399e-12	DS_vs_CTL	KAZN	2.22519e-14	TRUE	vRG	13.4695	9.33192
2.12598e-16	-0.799262	0.283	0.469	5.6566e-12	DS_vs_CTL	MARCKSL1	2.57933e-14	TRUE	vRG	2.40701	1.38276
2.33073e-16	1.0847	0.372	0.214	6.20138e-12	DS_vs_CTL	CTNNA2	2.79004e-14	TRUE	vRG	2.12724	4.51294
2.54703e-16	-1.26469	0.072	0.195	6.77688e-12	DS_vs_CTL	SERF2	3.00885e-14	TRUE	vRG	0.672941	0.27949
2.64118e-16	-0.354858	0.593	0.771	7.0274e-12	DS_vs_CTL	EEF1A1	3.07955e-14	TRUE	vRG	6.44282	5.03774
2.90824e-16	0.29779	0.931	0.942	7.73796e-12	DS_vs_CTL	NFIB	3.34746e-14	TRUE	vRG	14.1298	17.3695
3.03148e-16	-1.02456	0.178	0.343	8.06585e-12	DS_vs_CTL	RPS27	3.44514e-14	TRUE	vRG	1.6307	0.801085
4.08903e-16	-0.597542	0.487	0.672	1.08797e-11	DS_vs_CTL	CKB	4.58891e-14	TRUE	vRG	4.07583	2.6933
5.47478e-16	-0.390274	0.791	0.909	1.45667e-11	DS_vs_CTL	SYNE2	5.99547e-14	TRUE	vRG	12.8171	9.77904
5.47592e-16	-0.389859	0.282	0.447	1.45698e-11	DS_vs_CTL	RPS3	5.99547e-14	TRUE	vRG	1.87181	1.42835
6.2866e-16	-3.44386	0.011	0.088	1.67268e-11	DS_vs_CTL	GREB1L	6.80013e-14	TRUE	vRG	0.52786	0.0475913
1.36602e-15	0.356348	0.942	0.866	3.63456e-11	DS_vs_CTL	GLI3	1.46001e-13	TRUE	vRG	19.8585	25.4227
1.40548e-15	-0.89048	0.165	0.322	3.73956e-11	DS_vs_CTL	RPL36A	1.48452e-13	TRUE	vRG	1.27887	0.689412
1.46934e-15	-1.14455	0.088	0.219	3.90948e-11	DS_vs_CTL	H2AFZ	1.53392e-13	TRUE	vRG	0.751618	0.339436
1.7381e-15	-0.716185	0.514	0.658	4.62457e-11	DS_vs_CTL	NTM	1.79364e-13	TRUE	vRG	6.50308	3.95808
2.07698e-15	-0.745215	0.228	0.398	5.52623e-11	DS_vs_CTL	ACTR3B	2.09711e-13	TRUE	vRG	2.39206	1.42666
2.07889e-15	-1.17204	0.094	0.229	5.53131e-11	DS_vs_CTL	HIST1H4C	2.09711e-13	TRUE	vRG	1.02456	0.454142
2.2609e-15	-1.63593	0.068	0.19	6.01558e-11	DS_vs_CTL	NTN4	2.25538e-13	TRUE	vRG	1.20241	0.386212
2.48892e-15	-0.584741	0.075	0.169	6.62226e-11	DS_vs_CTL	BEX4	2.45555e-13	TRUE	vRG	0.488463	0.325371
3.1603e-15	-1.63762	0.14	0.266	8.4086e-11	DS_vs_CTL	AC109466.1	3.08404e-13	TRUE	vRG	3.02442	0.971327
3.27379e-15	-2.27044	0.083	0.202	8.71057e-11	DS_vs_CTL	RGS6	3.16044e-13	TRUE	vRG	4.99706	1.03493
3.33398e-15	-0.618742	0.06	0.141	8.87071e-11	DS_vs_CTL	RBIS	3.1843e-13	TRUE	vRG	0.45436	0.29556
3.48991e-15	-0.537284	0.451	0.635	9.2856e-11	DS_vs_CTL	KCNN3	3.29815e-13	TRUE	vRG	5.04694	3.47738
3.99892e-15	0.825653	0.333	0.281	1.06399e-10	DS_vs_CTL	MFSD4B	3.73982e-13	TRUE	vRG	1.26312	2.2395
4.57657e-15	-0.986225	0.08	0.198	1.21769e-10	DS_vs_CTL	MZT2B	4.23593e-13	TRUE	vRG	0.636199	0.320663
1.37613e-14	1.69189	0.241	0.127	3.66146e-10	DS_vs_CTL	LRRC7	1.2607e-12	TRUE	vRG	0.406337	1.31513
1.45178e-14	-0.732279	0.263	0.433	3.86274e-10	DS_vs_CTL	FAM182A	1.31657e-12	TRUE	vRG	2.56953	1.54635
1.74765e-14	3.18878	0.084	0.012	4.64996e-10	DS_vs_CTL	AC019127.1	1.56904e-12	TRUE	vRG	0.0464368	0.431876
1.85524e-14	-0.640571	0.251	0.416	4.93623e-10	DS_vs_CTL	RPL28	1.64914e-12	TRUE	vRG	1.96244	1.25848
3.27756e-14	-0.556306	0.187	0.328	8.7206e-10	DS_vs_CTL	POU3F2	2.88489e-12	TRUE	vRG	1.43878	0.978122
3.40488e-14	-0.936496	0.064	0.166	9.05937e-10	DS_vs_CTL	SELENOH	2.96787e-12	TRUE	vRG	0.52481	0.273743
4.88386e-14	-2.96884	0.014	0.087	1.29945e-09	DS_vs_CTL	GHR	4.21608e-12	TRUE	vRG	0.545302	0.0687714
5.15706e-14	-0.77579	0.311	0.483	1.37214e-09	DS_vs_CTL	TMSB10	4.40953e-12	TRUE	vRG	2.72378	1.59047
5.53107e-14	-0.424852	0.158	0.271	1.47165e-09	DS_vs_CTL	PWWP3A	4.68471e-12	TRUE	vRG	1.03488	0.770661
6.07568e-14	-0.771606	0.174	0.317	1.61656e-09	DS_vs_CTL	CANX	5.09789e-12	TRUE	vRG	1.54301	0.903435
6.16281e-14	-0.416415	0.475	0.649	1.63974e-09	DS_vs_CTL	STMN1	5.12312e-12	TRUE	vRG	3.62717	2.71754
6.79134e-14	1.30653	0.193	0.129	1.80697e-09	DS_vs_CTL	AQP4-AS1	5.59382e-12	TRUE	vRG	0.525121	1.30042
6.96803e-14	-0.0681164	0.251	0.351	1.85398e-09	DS_vs_CTL	NUCKS1	5.68718e-12	FALSE	vRG	1.51215	1.44239
7.06341e-14	-0.767832	0.194	0.345	1.87936e-09	DS_vs_CTL	RPS7	5.71309e-12	TRUE	vRG	1.50932	0.886017
7.19343e-14	-0.663952	0.333	0.506	1.91396e-09	DS_vs_CTL	RPS8	5.71561e-12	TRUE	vRG	2.64966	1.67197
7.19385e-14	-1.11866	0.056	0.154	1.91407e-09	DS_vs_CTL	HSBP1	5.71561e-12	TRUE	vRG	0.516456	0.237305
8.40038e-14	-1.62431	0.035	0.126	2.23509e-09	DS_vs_CTL	NES	6.61567e-12	TRUE	vRG	0.473649	0.15296
9.41778e-14	1.27161	0.18	0.115	2.50579e-09	DS_vs_CTL	AC119673.2	7.35028e-12	TRUE	vRG	0.403961	0.976777
9.4969e-14	-0.200487	0.18	0.276	2.52684e-09	DS_vs_CTL	NAA16	7.35028e-12	FALSE	vRG	1.07672	0.936916
1.04818e-13	2.77858	0.093	0.018	2.7889e-09	DS_vs_CTL	AC090577.1	8.04323e-12	TRUE	vRG	0.0729258	0.506505
1.06347e-13	-0.970741	0.086	0.2	2.82956e-09	DS_vs_CTL	GABARAP	8.09135e-12	TRUE	vRG	0.722712	0.368276
1.0894e-13	-0.560016	0.234	0.389	2.89857e-09	DS_vs_CTL	RACK1	8.21904e-12	TRUE	vRG	1.57203	1.06599
1.13747e-13	2.79878	0.101	0.028	3.02646e-09	DS_vs_CTL	TMLHE-AS1	8.45644e-12	TRUE	vRG	0.0892741	0.627423
1.14239e-13	1.49863	0.174	0.1	3.03956e-09	DS_vs_CTL	RANBP3L	8.45644e-12	TRUE	vRG	0.417157	1.1807
1.14913e-13	-1.3331	0.076	0.192	3.05748e-09	DS_vs_CTL	PRDX1	8.45644e-12	TRUE	vRG	0.826572	0.327478
1.18394e-13	2.3475	0.115	0.033	3.1501e-09	DS_vs_CTL	LINC01090	8.64177e-12	TRUE	vRG	0.12903	0.660954
1.20434e-13	-0.275642	0.213	0.316	3.20438e-09	DS_vs_CTL	FKBP10	8.71979e-12	TRUE	vRG	1.44433	1.19298
1.23394e-13	-0.591758	0.213	0.359	3.28315e-09	DS_vs_CTL	PSAP	8.86266e-12	TRUE	vRG	1.60374	1.06381
1.28736e-13	-0.759893	0.139	0.268	3.42529e-09	DS_vs_CTL	ITM2B	9.17298e-12	TRUE	vRG	1.17947	0.696125
1.414e-13	1.39545	0.173	0.063	3.76224e-09	DS_vs_CTL	CNTNAP2	9.996e-12	TRUE	vRG	0.344467	0.907905
1.44161e-13	-1.16412	0.193	0.337	3.83568e-09	DS_vs_CTL	AC110023.1	1.01115e-11	TRUE	vRG	2.86284	1.27695
1.48791e-13	-1.73239	0.046	0.145	3.95887e-09	DS_vs_CTL	NHS	1.03554e-11	TRUE	vRG	0.887442	0.266379
1.61516e-13	-0.637776	0.094	0.191	4.29746e-09	DS_vs_CTL	H2AFV	1.11546e-11	TRUE	vRG	0.728101	0.467607
1.82324e-13	-0.400414	0.174	0.289	4.85109e-09	DS_vs_CTL	RPS5	1.24955e-11	TRUE	vRG	1.12916	0.855272
2.03737e-13	-1.36792	0.039	0.129	5.42083e-09	DS_vs_CTL	PSRC1	1.38572e-11	TRUE	vRG	0.414474	0.159978
2.16242e-13	-0.466516	0.275	0.426	5.75355e-09	DS_vs_CTL	RPL8	1.45971e-11	TRUE	vRG	1.93759	1.40199
2.30686e-13	0.361799	0.366	0.381	6.13785e-09	DS_vs_CTL	BCKDHB	1.54559e-11	TRUE	vRG	1.88752	2.42584
2.58334e-13	0.676497	0.495	0.442	6.87348e-09	DS_vs_CTL	HES1	1.71801e-11	TRUE	vRG	2.81209	4.49507
2.64925e-13	3.66452	0.067	0.007	7.04887e-09	DS_vs_CTL	AC008957.1	1.7414e-11	TRUE	vRG	0.0248495	0.327242
2.65729e-13	0.810449	0.477	0.341	7.07026e-09	DS_vs_CTL	PDE1A	1.7414e-11	TRUE	vRG	1.91274	3.35529
2.74428e-13	0.2436	0.228	0.305	7.3017e-09	DS_vs_CTL	H1FX	1.78537e-11	FALSE	vRG	0.991614	1.17423
3.11587e-13	1.84598	0.138	0.061	8.29038e-09	DS_vs_CTL	AP001021.3	2.01254e-11	TRUE	vRG	0.241442	0.870698
3.17269e-13	-0.743061	0.147	0.275	8.44157e-09	DS_vs_CTL	SUMO2	2.0346e-11	TRUE	vRG	1.05339	0.62898
3.35231e-13	-0.584531	0.355	0.525	8.91949e-09	DS_vs_CTL	NNAT	2.13454e-11	TRUE	vRG	4.48596	2.99122
3.61541e-13	-0.738947	0.131	0.26	9.61952e-09	DS_vs_CTL	RPL35	2.28586e-11	TRUE	vRG	0.931332	0.557642
3.9082e-13	-0.437896	0.333	0.496	1.03986e-08	DS_vs_CTL	RPL6	2.4537e-11	TRUE	vRG	2.50397	1.84821
4.138e-13	-0.788284	0.267	0.429	1.101e-08	DS_vs_CTL	MARCKS	2.57993e-11	TRUE	vRG	2.21991	1.28499
4.24613e-13	0.578363	0.526	0.443	1.12977e-08	DS_vs_CTL	PPM1K	2.61447e-11	TRUE	vRG	2.49576	3.72709
4.25165e-13	-0.425393	0.206	0.331	1.13124e-08	DS_vs_CTL	HACD3	2.61447e-11	TRUE	vRG	1.47079	1.09497
4.39866e-13	2.23389	0.12	0.039	1.17035e-08	DS_vs_CTL	TSHR	2.68647e-11	TRUE	vRG	0.166485	0.787016
4.59696e-13	-1.7707	0.057	0.161	1.22311e-08	DS_vs_CTL	HSPB1	2.78861e-11	TRUE	vRG	0.922592	0.269673
4.78788e-13	-0.334651	0.174	0.283	1.27391e-08	DS_vs_CTL	HNRNPH3	2.88494e-11	TRUE	vRG	0.937202	0.742989
5.47792e-13	-0.62808	0.24	0.396	1.45751e-08	DS_vs_CTL	RPS12	3.27872e-11	TRUE	vRG	1.75581	1.13573
5.59435e-13	-0.528828	0.131	0.237	1.48849e-08	DS_vs_CTL	GRAMD1C	3.31808e-11	TRUE	vRG	1.08379	0.7509
5.6176e-13	-0.583032	0.145	0.262	1.49467e-08	DS_vs_CTL	H2AFY	3.31808e-11	TRUE	vRG	0.89968	0.60027
5.81266e-13	0.5664	0.484	0.421	1.54657e-08	DS_vs_CTL	L3MBTL4	3.41085e-11	TRUE	vRG	2.37884	3.52316
5.93532e-13	-1.95278	0.014	0.079	1.57921e-08	DS_vs_CTL	COL1A2	3.46022e-11	TRUE	vRG	0.238887	0.0609646
6.24734e-13	0.546265	0.671	0.554	1.66223e-08	DS_vs_CTL	AC131571.1	3.61862e-11	TRUE	vRG	4.90012	7.15615
6.46162e-13	0.615559	0.61	0.524	1.71924e-08	DS_vs_CTL	PTPRK	3.71874e-11	TRUE	vRG	2.99697	4.59238
6.86452e-13	-0.674088	0.168	0.304	1.82644e-08	DS_vs_CTL	PTMS	3.92545e-11	TRUE	vRG	0.966045	0.605086
7.26789e-13	-0.62546	0.179	0.314	1.93377e-08	DS_vs_CTL	RPLP2	4.12982e-11	TRUE	vRG	1.3086	0.847915
8.00567e-13	-0.030345	0.212	0.288	2.13007e-08	DS_vs_CTL	UPF2	4.52043e-11	FALSE	vRG	1.18224	1.15763
8.35555e-13	-0.624464	0.316	0.48	2.22316e-08	DS_vs_CTL	RPLP1	4.68851e-11	TRUE	vRG	2.42171	1.57053
8.44847e-13	0.471308	0.535	0.51	2.24789e-08	DS_vs_CTL	EZR	4.7112e-11	TRUE	vRG	3.18141	4.41102
9.67778e-13	-1.37358	0.063	0.166	2.57497e-08	DS_vs_CTL	PGK1	5.36192e-11	TRUE	vRG	0.725597	0.279419
9.73484e-13	-0.723443	0.143	0.265	2.59015e-08	DS_vs_CTL	UBB	5.36192e-11	TRUE	vRG	1.00807	0.610153
1.16854e-12	-2.17495	0.027	0.109	3.10915e-08	DS_vs_CTL	PLCG2	6.39707e-11	TRUE	vRG	0.438	0.0962123
1.2307e-12	0.231754	0.109	0.141	3.27452e-08	DS_vs_CTL	FAM118A	6.69072e-11	FALSE	vRG	0.431229	0.506581
1.23709e-12	-0.419058	0.096	0.176	3.29153e-08	DS_vs_CTL	TMX1	6.69072e-11	TRUE	vRG	0.679756	0.508162
1.26568e-12	-0.235519	0.095	0.164	3.36759e-08	DS_vs_CTL	DUT	6.80434e-11	FALSE	vRG	0.483672	0.41069
1.38578e-12	-0.702624	0.275	0.434	3.68716e-08	DS_vs_CTL	RPL34	7.40569e-11	TRUE	vRG	2.255	1.38522
1.42079e-12	-1.04579	0.072	0.172	3.78029e-08	DS_vs_CTL	FZD2	7.53598e-11	TRUE	vRG	0.764543	0.36982
1.42695e-12	-1.41959	0.015	0.073	3.79669e-08	DS_vs_CTL	HLA-C	7.53598e-11	TRUE	vRG	0.211126	0.0782986
1.57831e-12	-0.0509501	0.192	0.262	4.1994e-08	DS_vs_CTL	ZSCAN18	8.28657e-11	FALSE	vRG	0.946286	0.913439
1.59244e-12	-0.40736	0.535	0.697	4.23702e-08	DS_vs_CTL	PRDM16	8.31219e-11	TRUE	vRG	5.65815	4.26603
1.68237e-12	-1.15189	0.081	0.192	4.47628e-08	DS_vs_CTL	NDUFC2	8.73081e-11	TRUE	vRG	0.745115	0.334782
1.71549e-12	-0.185855	0.254	0.363	4.5644e-08	DS_vs_CTL	TTYH3	8.85153e-11	FALSE	vRG	1.6387	1.44053
1.78042e-12	0.399951	0.164	0.19	4.73717e-08	DS_vs_CTL	CCNL1	9.13407e-11	TRUE	vRG	0.62763	0.828492
1.80743e-12	2.74562	0.078	0.012	4.80903e-08	DS_vs_CTL	TEX14	9.21995e-11	TRUE	vRG	0.0567625	0.38664
1.89158e-12	-0.614851	0.188	0.321	5.03292e-08	DS_vs_CTL	TANC1	9.59468e-11	TRUE	vRG	1.67386	1.09269
1.91467e-12	0.501291	0.679	0.583	5.09435e-08	DS_vs_CTL	BOC	9.62915e-11	TRUE	vRG	4.86529	6.88717
1.91982e-12	-0.270591	0.183	0.281	5.10808e-08	DS_vs_CTL	ZFC3H1	9.62915e-11	TRUE	vRG	1.12125	0.929344
2.00261e-12	-0.640183	0.228	0.376	5.32834e-08	DS_vs_CTL	NACA	9.98856e-11	TRUE	vRG	1.51957	0.974654
2.06424e-12	-0.436838	0.172	0.283	5.49232e-08	DS_vs_CTL	ZNF37A	1.02391e-10	TRUE	vRG	1.17633	0.868774
2.31788e-12	-0.734261	0.063	0.146	6.16718e-08	DS_vs_CTL	PFN2	1.14168e-10	TRUE	vRG	0.406723	0.244103
2.32711e-12	-0.517407	0.196	0.328	6.19175e-08	DS_vs_CTL	RPSA	1.14168e-10	TRUE	vRG	1.28302	0.896066
2.35715e-12	-2.54299	0.007	0.062	6.27166e-08	DS_vs_CTL	AC002074.1	1.15013e-10	TRUE	vRG	0.251117	0.0422542
2.57232e-12	0.234555	0.986	0.993	6.84418e-08	DS_vs_CTL	NFIA	1.24834e-10	FALSE	vRG	28.2005	33.1793
2.86422e-12	-0.547455	0.202	0.334	7.62082e-08	DS_vs_CTL	PRELID2	1.38084e-10	TRUE	vRG	1.90943	1.30618
2.87611e-12	-0.285871	0.31	0.437	7.65247e-08	DS_vs_CTL	MEIS1	1.38084e-10	TRUE	vRG	2.42368	1.98785
2.89659e-12	-0.503538	0.207	0.339	7.70697e-08	DS_vs_CTL	TPT1	1.38328e-10	TRUE	vRG	1.38506	0.976709
3.01646e-12	-0.576366	0.091	0.182	8.02588e-08	DS_vs_CTL	BTF3	1.4329e-10	TRUE	vRG	0.593632	0.397803
3.1315e-12	-0.978225	0.206	0.354	8.33198e-08	DS_vs_CTL	FABP5	1.47972e-10	TRUE	vRG	2.11459	1.07289
3.22999e-12	-0.738504	0.198	0.342	8.59402e-08	DS_vs_CTL	EEF2	1.51219e-10	TRUE	vRG	1.55981	0.9345
3.2339e-12	0.668496	0.199	0.186	8.60445e-08	DS_vs_CTL	PXYLP1	1.51219e-10	TRUE	vRG	0.729064	1.15942
3.33932e-12	-0.377776	0.21	0.328	8.88493e-08	DS_vs_CTL	FDPS	1.55339e-10	TRUE	vRG	1.45206	1.11733
3.5248e-12	-0.608283	0.101	0.194	9.37844e-08	DS_vs_CTL	TMEM98	1.63122e-10	TRUE	vRG	0.741016	0.485758
3.57086e-12	-0.557755	0.222	0.365	9.50098e-08	DS_vs_CTL	RPL15	1.64406e-10	TRUE	vRG	1.45424	0.987645
3.62926e-12	-0.794575	0.202	0.348	9.65636e-08	DS_vs_CTL	MDK	1.66242e-10	TRUE	vRG	1.43258	0.825486
3.71948e-12	0.41706	0.783	0.677	9.89643e-08	DS_vs_CTL	TMEM132B	1.6951e-10	TRUE	vRG	8.41271	11.2331
3.91428e-12	0.808696	0.247	0.19	1.04147e-07	DS_vs_CTL	AGPAT3	1.77487e-10	TRUE	vRG	0.721874	1.26526
4.31188e-12	-0.828177	0.097	0.203	1.14726e-07	DS_vs_CTL	KNOP1	1.94533e-10	TRUE	vRG	0.872108	0.490779
4.44854e-12	-0.80217	0.108	0.223	1.18362e-07	DS_vs_CTL	COX4I1	1.99695e-10	TRUE	vRG	0.739695	0.423788
4.55978e-12	-1.20973	0.088	0.201	1.21322e-07	DS_vs_CTL	SCD	2.0367e-10	TRUE	vRG	0.916758	0.395797
4.58308e-12	-1.29346	0.092	0.207	1.21942e-07	DS_vs_CTL	LDHA	2.03697e-10	TRUE	vRG	1.23595	0.503644
4.69428e-12	-0.477463	0.098	0.183	1.24901e-07	DS_vs_CTL	SPECC1	2.07612e-10	TRUE	vRG	0.689967	0.495294
4.96518e-12	-0.0149838	0.276	0.358	1.32108e-07	DS_vs_CTL	PRRT2	2.18517e-10	FALSE	vRG	1.5437	1.52777
5.28596e-12	0.631518	0.151	0.147	1.40643e-07	DS_vs_CTL	WEE1	2.31499e-10	TRUE	vRG	0.499989	0.775175
5.73091e-12	0.126529	0.297	0.357	1.52482e-07	DS_vs_CTL	KHDRBS1	2.49767e-10	FALSE	vRG	1.50136	1.6391
5.97117e-12	-0.842364	0.093	0.196	1.58875e-07	DS_vs_CTL	CD63	2.58981e-10	TRUE	vRG	0.783907	0.436774
6.06177e-12	0.549166	0.454	0.415	1.61286e-07	DS_vs_CTL	PRMT2	2.61647e-10	TRUE	vRG	1.89313	2.77061
6.10752e-12	-0.226487	0.35	0.485	1.62503e-07	DS_vs_CTL	RPL5	2.6236e-10	FALSE	vRG	2.23658	1.91151
6.27794e-12	-1.02419	0.076	0.177	1.67037e-07	DS_vs_CTL	DNAJC15	2.68397e-10	TRUE	vRG	0.726308	0.356613
6.3812e-12	-0.285488	0.259	0.385	1.69785e-07	DS_vs_CTL	RPL14	2.71286e-10	TRUE	vRG	1.5715	1.2892
6.40594e-12	-0.938301	0.066	0.157	1.70443e-07	DS_vs_CTL	RPS27L	2.71286e-10	TRUE	vRG	0.554085	0.288677
6.66957e-12	-0.922408	0.068	0.159	1.77457e-07	DS_vs_CTL	PNRC1	2.81124e-10	TRUE	vRG	0.543659	0.286385
6.85634e-12	-0.770076	0.128	0.247	1.82427e-07	DS_vs_CTL	ZNF428	2.87646e-10	TRUE	vRG	0.859557	0.503629
6.96726e-12	0.308931	0.422	0.444	1.85378e-07	DS_vs_CTL	MYH10	2.9094e-10	TRUE	vRG	2.23576	2.76991
7.07696e-12	-1.47858	0.055	0.151	1.88297e-07	DS_vs_CTL	COX7A2	2.94153e-10	TRUE	vRG	0.517737	0.185146
7.30803e-12	-0.291116	0.197	0.297	1.94445e-07	DS_vs_CTL	NFE2L2	3.02357e-10	TRUE	vRG	1.4111	1.15308
8.21773e-12	-0.722608	0.079	0.171	2.18649e-07	DS_vs_CTL	HNRNPA0	3.38435e-10	TRUE	vRG	0.57994	0.351061
9.10716e-12	0.0713755	0.312	0.38	2.42314e-07	DS_vs_CTL	ZNF280D	3.73352e-10	FALSE	vRG	1.60308	1.68446
9.56729e-12	-0.572594	0.094	0.183	2.54557e-07	DS_vs_CTL	HNRNPF	3.90433e-10	TRUE	vRG	0.725914	0.487795
1.00866e-11	-0.720601	0.203	0.343	2.68374e-07	DS_vs_CTL	RPL22	4.09762e-10	TRUE	vRG	1.40441	0.851874
1.02924e-11	-0.208427	0.345	0.466	2.73851e-07	DS_vs_CTL	HNRNPU	4.16241e-10	FALSE	vRG	2.00771	1.73752
1.05748e-11	-0.55508	0.057	0.123	2.81365e-07	DS_vs_CTL	VDAC2	4.25744e-10	TRUE	vRG	0.328237	0.223099
1.19102e-11	-1.06973	0.06	0.149	3.16896e-07	DS_vs_CTL	SFRP2	4.77366e-10	TRUE	vRG	0.657328	0.312638
1.28302e-11	0.0405113	0.337	0.408	3.41374e-07	DS_vs_CTL	NOTCH2	5.11955e-10	FALSE	vRG	2.01798	2.07551
1.42769e-11	-0.125589	0.201	0.284	3.79865e-07	DS_vs_CTL	SREK1	5.67159e-10	FALSE	vRG	1.07497	0.985287
1.54472e-11	-0.668702	0.337	0.494	4.11003e-07	DS_vs_CTL	PAM	6.10947e-10	TRUE	vRG	3.41644	2.14883
1.60694e-11	-0.447522	0.348	0.498	4.2756e-07	DS_vs_CTL	HMGN3	6.3277e-10	TRUE	vRG	2.49215	1.82725
1.61492e-11	-0.639111	0.053	0.12	4.29682e-07	DS_vs_CTL	DAD1	6.33134e-10	TRUE	vRG	0.407785	0.261496
1.62316e-11	-0.3857	0.215	0.331	4.31874e-07	DS_vs_CTL	AEBP2	6.33597e-10	TRUE	vRG	1.49914	1.14723
1.7638e-11	-0.150043	0.132	0.2	4.69293e-07	DS_vs_CTL	FLOT1	6.85514e-10	FALSE	vRG	0.669081	0.602914
1.80846e-11	-0.858919	0.153	0.282	4.81176e-07	DS_vs_CTL	SRP14	6.99842e-10	TRUE	vRG	1.24849	0.687933
1.91753e-11	-0.342239	0.193	0.305	5.10198e-07	DS_vs_CTL	MYL6	7.38868e-10	TRUE	vRG	1.10399	0.870649
1.92955e-11	-1.58688	0.02	0.084	5.13394e-07	DS_vs_CTL	TC2N	7.40319e-10	TRUE	vRG	0.347149	0.114896
2.08498e-11	1.73255	0.113	0.05	5.54751e-07	DS_vs_CTL	THBS3	7.94899e-10	TRUE	vRG	0.158615	0.529536
2.08951e-11	-0.0834791	0.36	0.456	5.55956e-07	DS_vs_CTL	GIGYF2	7.94899e-10	FALSE	vRG	2.13693	2.01675
2.14456e-11	-0.194309	0.185	0.271	5.70602e-07	DS_vs_CTL	SEPTIN10	8.12398e-10	FALSE	vRG	1.07567	0.940023
2.1914e-11	-0.428117	0.318	0.457	5.83067e-07	DS_vs_CTL	PSIP1	8.26656e-10	TRUE	vRG	2.38008	1.76871
2.20808e-11	0.242349	0.12	0.154	5.87503e-07	DS_vs_CTL	PURG	8.28734e-10	FALSE	vRG	0.450768	0.533435
2.21537e-11	-0.55916	0.133	0.232	5.89444e-07	DS_vs_CTL	LDHB	8.28734e-10	TRUE	vRG	0.856132	0.580747
2.34042e-11	-0.708336	0.24	0.386	6.22715e-07	DS_vs_CTL	FTH1	8.71878e-10	TRUE	vRG	1.74879	1.06993
2.41771e-11	-0.0211017	0.436	0.529	6.43281e-07	DS_vs_CTL	SRSF11	8.96951e-10	FALSE	vRG	2.53223	2.49547
2.57219e-11	-0.567757	0.153	0.263	6.84382e-07	DS_vs_CTL	MGST3	9.50333e-10	TRUE	vRG	1.02875	0.693748
2.64026e-11	-0.613239	0.095	0.184	7.02493e-07	DS_vs_CTL	PSMA7	9.71485e-10	TRUE	vRG	0.642033	0.419381
3.03819e-11	-0.30526	0.221	0.327	8.08372e-07	DS_vs_CTL	SACS	1.11266e-09	TRUE	vRG	1.40632	1.13796
3.04872e-11	0.672906	0.371	0.296	8.11173e-07	DS_vs_CTL	USP25	1.11266e-09	TRUE	vRG	1.38827	2.21393
3.11177e-11	-0.738756	0.266	0.415	8.27948e-07	DS_vs_CTL	LINC01551	1.13107e-09	TRUE	vRG	2.24331	1.34392
3.1468e-11	-0.647473	0.196	0.327	8.3727e-07	DS_vs_CTL	WIPF3	1.13919e-09	TRUE	vRG	1.66227	1.06084
3.41903e-11	0.942657	0.31	0.2	9.097e-07	DS_vs_CTL	ADAMTSL4-AS1	1.23277e-09	TRUE	vRG	1.19194	2.29196
3.57631e-11	0.135299	0.171	0.215	9.51548e-07	DS_vs_CTL	DYNLT1	1.28432e-09	FALSE	vRG	0.699023	0.767878
3.66721e-11	-0.23183	0.381	0.504	9.75734e-07	DS_vs_CTL	SEPTIN7	1.31172e-09	FALSE	vRG	2.57823	2.19537
3.69585e-11	0.057167	0.157	0.211	9.83355e-07	DS_vs_CTL	ZNF711	1.31672e-09	FALSE	vRG	0.686636	0.714458
3.97939e-11	-0.291683	0.197	0.291	1.0588e-06	DS_vs_CTL	VAPA	1.41213e-09	TRUE	vRG	1.19118	0.972968
4.15795e-11	-0.0837251	0.14	0.209	1.1063e-06	DS_vs_CTL	SRSF2	1.46344e-09	FALSE	vRG	0.5055	0.476966
4.16899e-11	-0.200976	0.26	0.363	1.10924e-06	DS_vs_CTL	AF117829.1	1.46344e-09	FALSE	vRG	1.83109	1.59287
4.17287e-11	0.059648	0.238	0.302	1.11027e-06	DS_vs_CTL	ATP1A2	1.46344e-09	FALSE	vRG	1.39483	1.45378
4.23441e-11	0.461436	0.359	0.346	1.12665e-06	DS_vs_CTL	CASTOR3	1.47924e-09	TRUE	vRG	1.40917	1.94071
4.31065e-11	-0.196166	0.1	0.164	1.14694e-06	DS_vs_CTL	ZBED5	1.50004e-09	FALSE	vRG	0.501878	0.437966
4.51349e-11	-0.75426	0.052	0.123	1.2009e-06	DS_vs_CTL	ELOB	1.56456e-09	TRUE	vRG	0.3381	0.200045
4.62415e-11	-0.233275	0.173	0.259	1.23035e-06	DS_vs_CTL	TBC1D19	1.59676e-09	FALSE	vRG	1.13412	0.964666
5.05719e-11	0.126489	0.606	0.68	1.34557e-06	DS_vs_CTL	C15orf41	1.7396e-09	FALSE	vRG	5.09025	5.55681
5.1308e-11	-0.743082	0.102	0.207	1.36515e-06	DS_vs_CTL	DDAH2	1.75818e-09	TRUE	vRG	0.659111	0.393402
5.18172e-11	1.34664	0.177	0.101	1.3787e-06	DS_vs_CTL	AC008957.2	1.76888e-09	TRUE	vRG	0.405148	1.032
5.28642e-11	-0.729599	0.147	0.265	1.40656e-06	DS_vs_CTL	TMBIM6	1.79778e-09	TRUE	vRG	1.16192	0.700336
5.49532e-11	-0.238591	0.175	0.263	1.46214e-06	DS_vs_CTL	CAPZA1	1.85976e-09	FALSE	vRG	1.05055	0.890289
5.51009e-11	0.231153	0.293	0.33	1.46607e-06	DS_vs_CTL	CUL3	1.85976e-09	FALSE	vRG	1.38386	1.62455
5.63438e-11	-1.65209	0.036	0.117	1.49914e-06	DS_vs_CTL	SAT2	1.89459e-09	TRUE	vRG	0.286017	0.0903226
5.68033e-11	-0.344319	0.154	0.249	1.51136e-06	DS_vs_CTL	DCUN1D4	1.90291e-09	TRUE	vRG	0.90055	0.70915
5.83749e-11	0.075258	0.192	0.244	1.55318e-06	DS_vs_CTL	IP6K2	1.94829e-09	FALSE	vRG	0.805272	0.848475
5.95104e-11	-0.727606	0.13	0.242	1.58339e-06	DS_vs_CTL	ENO1	1.97883e-09	TRUE	vRG	0.985622	0.594837
6.11361e-11	-0.223245	0.174	0.257	1.62665e-06	DS_vs_CTL	ACTN1	2.02539e-09	FALSE	vRG	1.10444	0.945978
6.32158e-11	-0.50699	0.301	0.446	1.68198e-06	DS_vs_CTL	TRIM24	2.08659e-09	TRUE	vRG	2.40878	1.69475
6.69398e-11	0.468744	0.537	0.496	1.78107e-06	DS_vs_CTL	MIR181A1HG	2.19496e-09	TRUE	vRG	2.78456	3.85399
6.69882e-11	0.0633821	0.13	0.183	1.78235e-06	DS_vs_CTL	UQCRC2	2.19496e-09	FALSE	vRG	0.603523	0.630701
6.89219e-11	0.0277233	0.119	0.165	1.8338e-06	DS_vs_CTL	STRAP	2.25011e-09	FALSE	vRG	0.567535	0.578592
7.00129e-11	2.05065	0.12	0.045	1.86283e-06	DS_vs_CTL	TSBP1	2.27745e-09	TRUE	vRG	0.162425	0.676199
7.02938e-11	-0.599644	0.286	0.435	1.87031e-06	DS_vs_CTL	RPL7A	2.27833e-09	TRUE	vRG	2.11368	1.39452
7.13067e-11	-0.821782	0.18	0.312	1.89726e-06	DS_vs_CTL	RORB	2.30285e-09	TRUE	vRG	1.99367	1.12748
7.30198e-11	0.200407	0.331	0.374	1.94284e-06	DS_vs_CTL	ACAP2	2.34285e-09	FALSE	vRG	1.65802	1.90528
7.30673e-11	-1.16876	0.148	0.271	1.9441e-06	DS_vs_CTL	CALR	2.34285e-09	TRUE	vRG	1.52076	0.675887
7.39877e-11	-0.472288	0.227	0.355	1.96859e-06	DS_vs_CTL	RPS6	2.36392e-09	TRUE	vRG	1.39154	1.00278
7.70298e-11	-0.0874559	0.199	0.285	2.04953e-06	DS_vs_CTL	VAMP2	2.45239e-09	FALSE	vRG	1.00991	0.950469
7.82278e-11	0.126123	0.247	0.297	2.08141e-06	DS_vs_CTL	SYNRG	2.48173e-09	FALSE	vRG	1.22843	1.34077
7.99521e-11	-0.728131	0.219	0.358	2.12729e-06	DS_vs_CTL	RPL35A	2.52618e-09	TRUE	vRG	1.53184	0.92436
8.01918e-11	2.70335	0.059	0.007	2.13366e-06	DS_vs_CTL	AL133415.1	2.52618e-09	TRUE	vRG	0.0475934	0.315725
8.14569e-11	0.0933928	0.172	0.221	2.16732e-06	DS_vs_CTL	PTAR1	2.55706e-09	FALSE	vRG	0.79083	0.843813
8.23376e-11	-0.38104	0.248	0.365	2.19076e-06	DS_vs_CTL	PHYKPL	2.5757e-09	TRUE	vRG	1.86309	1.43042
8.39955e-11	0.472519	0.288	0.279	2.23487e-06	DS_vs_CTL	MYO1E	2.61844e-09	TRUE	vRG	1.32586	1.8401
8.73896e-11	1.02493	0.277	0.186	2.32518e-06	DS_vs_CTL	BCL2L14	2.71482e-09	TRUE	vRG	0.807337	1.64392
9.182e-11	-0.016167	0.178	0.25	2.44306e-06	DS_vs_CTL	AC097376.3	2.84262e-09	FALSE	vRG	1.13053	1.11794
9.26118e-11	-0.280239	0.271	0.383	2.46412e-06	DS_vs_CTL	SEPTIN2	2.85728e-09	TRUE	vRG	1.65238	1.36051
9.32075e-11	0.0609421	0.14	0.186	2.47997e-06	DS_vs_CTL	SAFB2	2.8627e-09	FALSE	vRG	0.614743	0.641337
9.34252e-11	-0.0557538	0.175	0.242	2.48576e-06	DS_vs_CTL	TAX1BP1	2.8627e-09	FALSE	vRG	0.958075	0.921742
9.46378e-11	-0.220447	0.086	0.155	2.51803e-06	DS_vs_CTL	ATP5MG	2.89e-09	FALSE	vRG	0.484031	0.415322
9.70486e-11	-0.204518	0.217	0.308	2.58217e-06	DS_vs_CTL	SRRM1	2.95357e-09	FALSE	vRG	1.27512	1.10648
9.88539e-11	-0.11609	0.105	0.159	2.63021e-06	DS_vs_CTL	PDCD6	2.99835e-09	FALSE	vRG	0.509258	0.46983
9.92598e-11	0.240362	0.279	0.318	2.64101e-06	DS_vs_CTL	NUP160	3.00052e-09	FALSE	vRG	1.31534	1.55401
1.01106e-10	0.881013	0.264	0.191	2.69012e-06	DS_vs_CTL	HUNK	3.04606e-09	TRUE	vRG	0.797158	1.469
1.07107e-10	-1.25601	0.09	0.196	2.8498e-06	DS_vs_CTL	BRINP3	3.21608e-09	TRUE	vRG	1.26678	0.52982
1.08102e-10	1.13701	0.096	0.078	2.87628e-06	DS_vs_CTL	RHOB	3.23514e-09	TRUE	vRG	0.22119	0.487721
1.09691e-10	-0.444237	0.071	0.137	2.91855e-06	DS_vs_CTL	FSCN1	3.27178e-09	TRUE	vRG	0.426422	0.313159
1.11193e-10	-1.35537	0.06	0.152	2.9585e-06	DS_vs_CTL	BX890604.2	3.30558e-09	TRUE	vRG	0.641704	0.250193
1.14825e-10	-0.373971	0.151	0.242	3.05515e-06	DS_vs_CTL	MRPS5	3.40231e-09	TRUE	vRG	0.942503	0.727076
1.18633e-10	-0.413887	0.087	0.162	3.15647e-06	DS_vs_CTL	MIF	3.50358e-09	TRUE	vRG	0.560906	0.420781
1.22616e-10	0.221205	0.181	0.214	3.26244e-06	DS_vs_CTL	KLHL24	3.60933e-09	FALSE	vRG	0.743081	0.866412
1.23625e-10	-0.568069	0.241	0.38	3.28929e-06	DS_vs_CTL	RPS14	3.62714e-09	TRUE	vRG	1.67449	1.12917
1.25052e-10	-0.218019	0.252	0.346	3.32726e-06	DS_vs_CTL	METTL15	3.65706e-09	FALSE	vRG	1.66759	1.43358
1.29334e-10	-0.472929	0.226	0.353	3.44119e-06	DS_vs_CTL	SQLE	3.75789e-09	TRUE	vRG	1.78539	1.28611
1.29516e-10	-0.568753	0.341	0.49	3.44602e-06	DS_vs_CTL	TTYH1	3.75789e-09	TRUE	vRG	2.97326	2.00425
1.29756e-10	-0.663897	0.391	0.537	3.45241e-06	DS_vs_CTL	RPS24	3.75789e-09	TRUE	vRG	3.02482	1.90882
1.38513e-10	0.333829	0.237	0.254	3.68541e-06	DS_vs_CTL	CDK17	3.99861e-09	TRUE	vRG	1.02486	1.29198
1.41008e-10	0.0410069	0.376	0.457	3.7518e-06	DS_vs_CTL	ASPH	4.0576e-09	FALSE	vRG	2.43489	2.50515
1.47872e-10	-0.183328	0.198	0.278	3.93444e-06	DS_vs_CTL	ACIN1	4.24152e-09	FALSE	vRG	0.996814	0.877764
1.5249e-10	-2.33169	0.036	0.112	4.05729e-06	DS_vs_CTL	GPX3	4.36004e-09	TRUE	vRG	0.872976	0.172611
1.56688e-10	0.410706	0.401	0.391	4.16901e-06	DS_vs_CTL	CBR4	4.46587e-09	TRUE	vRG	1.89107	2.51423
1.61302e-10	0.392457	0.634	0.614	4.29177e-06	DS_vs_CTL	CTNND1	4.58283e-09	TRUE	vRG	4.25605	5.58695
1.64394e-10	0.358105	0.905	0.885	4.37402e-06	DS_vs_CTL	FTX	4.65592e-09	TRUE	vRG	10.6188	13.6109
1.66165e-10	-0.226535	0.1	0.161	4.42115e-06	DS_vs_CTL	ZNF429	4.69129e-09	FALSE	vRG	0.588588	0.502932
1.69505e-10	-0.572419	0.227	0.364	4.51001e-06	DS_vs_CTL	RPL26	4.77057e-09	TRUE	vRG	1.57702	1.06021
1.77005e-10	1.68416	0.12	0.059	4.70957e-06	DS_vs_CTL	2024-12-01	4.96609e-09	TRUE	vRG	0.213996	0.690007
1.79882e-10	-0.115428	0.201	0.276	4.78611e-06	DS_vs_CTL	TRA2B	5.03108e-09	FALSE	vRG	1.06083	0.979202
1.82849e-10	-0.165707	0.152	0.22	4.86506e-06	DS_vs_CTL	NUDCD3	5.08366e-09	FALSE	vRG	0.852294	0.759725
1.82894e-10	-0.0119414	0.121	0.176	4.86626e-06	DS_vs_CTL	RNF144A	5.08366e-09	FALSE	vRG	0.581965	0.577185
1.90795e-10	0.76888	0.238	0.199	5.07649e-06	DS_vs_CTL	KLF6	5.27865e-09	TRUE	vRG	0.866941	1.47798
1.91085e-10	-0.465823	0.132	0.222	5.0842e-06	DS_vs_CTL	PDIA6	5.27865e-09	TRUE	vRG	0.867787	0.628067
1.93274e-10	-0.0105662	0.316	0.39	5.14244e-06	DS_vs_CTL	ATP2B4	5.32274e-09	FALSE	vRG	1.96312	1.94882
1.96033e-10	1.08243	0.198	0.13	5.21584e-06	DS_vs_CTL	AC079385.1	5.36435e-09	TRUE	vRG	0.533221	1.13033
1.96239e-10	-1.21279	0.047	0.127	5.22132e-06	DS_vs_CTL	ATP5MF	5.36435e-09	TRUE	vRG	0.416383	0.179077
1.96577e-10	-0.718826	0.084	0.171	5.23033e-06	DS_vs_CTL	ANGPT1	5.36435e-09	TRUE	vRG	0.797543	0.484198
2.07971e-10	-0.279303	0.275	0.406	5.53349e-06	DS_vs_CTL	RPL18	5.65808e-09	TRUE	vRG	1.73048	1.42574
2.14247e-10	-0.858308	0.246	0.383	5.70048e-06	DS_vs_CTL	AC091078.1	5.81121e-09	TRUE	vRG	2.99077	1.64927
2.24505e-10	-0.124307	0.301	0.39	5.97341e-06	DS_vs_CTL	PIAS1	6.07111e-09	FALSE	vRG	1.82808	1.6771
2.28379e-10	0.293563	0.976	0.968	6.07648e-06	DS_vs_CTL	NKAIN3	6.15732e-09	TRUE	vRG	35.4076	43.398
2.34392e-10	-0.393774	0.11	0.185	6.23648e-06	DS_vs_CTL	FLNA	6.30052e-09	TRUE	vRG	0.517132	0.393385
2.35173e-10	0.0967886	0.268	0.325	6.25724e-06	DS_vs_CTL	CSNK2A1	6.30262e-09	FALSE	vRG	1.40013	1.49739
2.36783e-10	0.305558	0.133	0.156	6.30008e-06	DS_vs_CTL	DDX42	6.31949e-09	TRUE	vRG	0.488438	0.603928
2.3721e-10	-0.480233	0.077	0.146	6.31144e-06	DS_vs_CTL	TAF7	6.31949e-09	TRUE	vRG	0.493698	0.353645
2.40429e-10	-0.276273	0.235	0.335	6.39709e-06	DS_vs_CTL	PON2	6.3863e-09	TRUE	vRG	1.51716	1.2526
2.44958e-10	-0.49762	0.06	0.127	6.51759e-06	DS_vs_CTL	PGRMC1	6.4874e-09	TRUE	vRG	0.427291	0.302362
2.48716e-10	-0.12145	0.496	0.616	6.61759e-06	DS_vs_CTL	NSD3	6.56757e-09	FALSE	vRG	3.42939	3.15246
2.62794e-10	-0.0862288	0.171	0.238	6.99217e-06	DS_vs_CTL	ATP5MC2	6.91896e-09	FALSE	vRG	0.874645	0.823865
2.71516e-10	-3.05919	0.011	0.064	7.22424e-06	DS_vs_CTL	LRP2	7.1277e-09	TRUE	vRG	0.348488	0.0409222
2.82742e-10	0.108133	0.108	0.146	7.52292e-06	DS_vs_CTL	NBPF11	7.38148e-09	FALSE	vRG	0.476873	0.514095
2.82828e-10	-0.947821	0.035	0.104	7.5252e-06	DS_vs_CTL	PRKY	7.38148e-09	TRUE	vRG	0.301289	0.155718
2.86337e-10	0.256945	0.475	0.497	7.61858e-06	DS_vs_CTL	ITGA2	7.45141e-09	TRUE	vRG	3.19062	3.81285
2.87982e-10	0.0288099	0.136	0.184	7.66235e-06	DS_vs_CTL	SCP2	7.47256e-09	FALSE	vRG	0.67879	0.692528
2.91781e-10	-0.484655	0.098	0.173	7.76341e-06	DS_vs_CTL	TMEM123	7.5493e-09	TRUE	vRG	0.615372	0.439516
2.95028e-10	0.580659	0.166	0.162	7.8498e-06	DS_vs_CTL	SLC25A29	7.61138e-09	TRUE	vRG	0.386284	0.578239
2.96534e-10	0.0578502	0.15	0.201	7.88989e-06	DS_vs_CTL	ADD3	7.62833e-09	FALSE	vRG	0.817827	0.851355
3.03503e-10	-0.0867242	0.239	0.317	8.0753e-06	DS_vs_CTL	ANKRD36B	7.78528e-09	FALSE	vRG	1.32721	1.24974
3.10911e-10	0.947774	0.225	0.161	8.27241e-06	DS_vs_CTL	MCM3AP	7.95259e-09	TRUE	vRG	0.567129	1.09492
3.16458e-10	0.422041	0.313	0.314	8.42e-06	DS_vs_CTL	CBLB	8.07148e-09	TRUE	vRG	1.23555	1.6558
3.24985e-10	-1.1685	0.051	0.131	8.64687e-06	DS_vs_CTL	ATP5ME	8.26547e-09	TRUE	vRG	0.462031	0.204999
3.35209e-10	0.524196	0.5	0.45	8.9189e-06	DS_vs_CTL	ID4	8.50143e-09	TRUE	vRG	3.08347	4.43492
3.3637e-10	-0.0148289	0.135	0.184	8.94979e-06	DS_vs_CTL	NR2E1	8.50684e-09	FALSE	vRG	0.704909	0.697716
3.45184e-10	-1.4939	0.035	0.111	9.18431e-06	DS_vs_CTL	FAM106A	8.70523e-09	TRUE	vRG	0.284379	0.100326
3.46833e-10	-0.365771	0.471	0.614	9.22819e-06	DS_vs_CTL	FUS	8.72232e-09	TRUE	vRG	3.82906	2.97135
3.50854e-10	0.0745788	0.321	0.39	9.33518e-06	DS_vs_CTL	ATF7IP	8.7988e-09	FALSE	vRG	1.78502	1.8798
3.56458e-10	1.11677	0.171	0.141	9.48427e-06	DS_vs_CTL	HECW1	8.91442e-09	TRUE	vRG	0.487758	1.05899
3.60094e-10	-0.0550878	0.311	0.386	9.58103e-06	DS_vs_CTL	TCF25	8.98036e-09	FALSE	vRG	1.69087	1.62751
3.71681e-10	1.74181	0.099	0.058	9.88933e-06	DS_vs_CTL	UNC79	9.24364e-09	TRUE	vRG	0.110924	0.373448
3.9126e-10	-0.407825	0.142	0.23	1.04102e-05	DS_vs_CTL	LPCAT1	9.70367e-09	TRUE	vRG	0.878312	0.661805
4.00221e-10	0.115251	0.247	0.298	1.06487e-05	DS_vs_CTL	CWC27	9.89858e-09	FALSE	vRG	1.27705	1.38337
4.04197e-10	0.388229	0.806	0.721	1.07545e-05	DS_vs_CTL	CDON	9.96421e-09	TRUE	vRG	8.31276	10.88
4.05094e-10	-0.147594	0.509	0.638	1.07783e-05	DS_vs_CTL	TUBB2B	9.96421e-09	FALSE	vRG	3.43807	3.10366
4.09381e-10	-0.780248	0.223	0.356	1.08924e-05	DS_vs_CTL	MSMO1	1.00173e-08	TRUE	vRG	2.07933	1.21031
4.10476e-10	-0.26007	0.123	0.191	1.09215e-05	DS_vs_CTL	TM9SF2	1.00173e-08	TRUE	vRG	0.69413	0.579485
4.10601e-10	-0.221234	0.324	0.434	1.09249e-05	DS_vs_CTL	ZNF644	1.00173e-08	FALSE	vRG	2.06391	1.77036
4.23104e-10	1.44384	0.19	0.104	1.12575e-05	DS_vs_CTL	AC015923.1	1.02944e-08	TRUE	vRG	0.420286	1.14517
4.52634e-10	-0.166088	0.09	0.144	1.20432e-05	DS_vs_CTL	BRD3	1.09831e-08	FALSE	vRG	0.484076	0.431348
4.56109e-10	0.0892583	0.336	0.39	1.21357e-05	DS_vs_CTL	TDRD3	1.10376e-08	FALSE	vRG	1.98752	2.11446
4.69232e-10	-1.36408	0.114	0.219	1.24849e-05	DS_vs_CTL	PBX3	1.13065e-08	TRUE	vRG	1.6577	0.643381
4.69739e-10	0.641023	0.34	0.279	1.24983e-05	DS_vs_CTL	CRYZL1	1.13065e-08	TRUE	vRG	1.22792	1.91546
4.78601e-10	-1.32609	0.045	0.122	1.27341e-05	DS_vs_CTL	HLA-A	1.1489e-08	TRUE	vRG	0.481171	0.191315
5.01579e-10	0.709892	0.311	0.259	1.33455e-05	DS_vs_CTL	TPM4	1.20085e-08	TRUE	vRG	1.18157	1.93336
5.18573e-10	-1.5395	0.032	0.105	1.37977e-05	DS_vs_CTL	AC099489.1	1.23755e-08	TRUE	vRG	0.52846	0.181137
5.19667e-10	-0.770357	0.074	0.156	1.38268e-05	DS_vs_CTL	SLC4A4	1.23755e-08	TRUE	vRG	0.652863	0.382352
5.24702e-10	-0.118052	0.293	0.385	1.39608e-05	DS_vs_CTL	CD46	1.24624e-08	FALSE	vRG	1.62714	1.49924
5.2775e-10	-0.305668	0.135	0.212	1.40419e-05	DS_vs_CTL	VDAC3	1.25017e-08	TRUE	vRG	0.690874	0.558791
5.32472e-10	-0.307118	0.248	0.356	1.41675e-05	DS_vs_CTL	TTBK2	1.25466e-08	TRUE	vRG	1.66895	1.34876
5.32555e-10	-0.926854	0.053	0.127	1.41697e-05	DS_vs_CTL	ARL6IP5	1.25466e-08	TRUE	vRG	0.448215	0.235297
5.33838e-10	-1.00572	0.024	0.077	1.42038e-05	DS_vs_CTL	SELENOK	1.25466e-08	TRUE	vRG	0.240583	0.11932
5.38311e-10	-0.71051	0.191	0.318	1.43228e-05	DS_vs_CTL	FAU	1.26187e-08	TRUE	vRG	1.30421	0.796632
5.72939e-10	-0.301039	0.106	0.174	1.52442e-05	DS_vs_CTL	CCDC90B	1.33954e-08	TRUE	vRG	0.6222	0.504849
5.80125e-10	0.469226	0.66	0.54	1.54354e-05	DS_vs_CTL	LRRC3B	1.35048e-08	TRUE	vRG	4.75998	6.58998
5.80626e-10	0.96337	0.245	0.177	1.54487e-05	DS_vs_CTL	TNC	1.35048e-08	TRUE	vRG	1.11938	2.18365
5.89784e-10	-0.181821	0.196	0.277	1.56924e-05	DS_vs_CTL	OIP5-AS1	1.36776e-08	FALSE	vRG	1.15935	1.02198
5.91101e-10	-0.506884	0.064	0.13	1.57274e-05	DS_vs_CTL	DSEL	1.36776e-08	TRUE	vRG	0.419358	0.294838
6.03407e-10	-0.525895	0.144	0.243	1.60548e-05	DS_vs_CTL	NPM1	1.39264e-08	TRUE	vRG	0.881256	0.611766
6.11992e-10	-0.360595	0.076	0.139	1.62833e-05	DS_vs_CTL	SRSF9	1.40884e-08	TRUE	vRG	0.462431	0.359957
6.1659e-10	-0.859062	0.039	0.102	1.64056e-05	DS_vs_CTL	SLC7A11	1.41579e-08	TRUE	vRG	0.372336	0.204833
6.29052e-10	0.241402	0.115	0.142	1.67372e-05	DS_vs_CTL	TMEM161B	1.44072e-08	FALSE	vRG	0.443135	0.524062
6.37477e-10	0.833836	0.357	0.26	1.69613e-05	DS_vs_CTL	GRIA2	1.4563e-08	TRUE	vRG	0.892721	1.59204
6.60931e-10	0.115336	0.18	0.227	1.75854e-05	DS_vs_CTL	MAU2	1.50605e-08	FALSE	vRG	0.865243	0.937366
6.68975e-10	-0.08514	0.144	0.206	1.77994e-05	DS_vs_CTL	CPSF7	1.52052e-08	FALSE	vRG	0.687978	0.648518
6.74891e-10	-0.0954142	0.149	0.212	1.79568e-05	DS_vs_CTL	YY1	1.53009e-08	FALSE	vRG	0.777968	0.728139
6.77909e-10	-0.276051	0.272	0.39	1.80371e-05	DS_vs_CTL	HNRNPH1	1.53306e-08	TRUE	vRG	1.20989	0.999032
7.05825e-10	-0.253285	0.388	0.513	1.87799e-05	DS_vs_CTL	GNAO1	1.59219e-08	TRUE	vRG	2.88308	2.41871
7.19413e-10	-0.315275	0.266	0.377	1.91414e-05	DS_vs_CTL	HDAC4	1.61641e-08	TRUE	vRG	1.75926	1.41373
7.20166e-10	-0.086419	0.117	0.168	1.91615e-05	DS_vs_CTL	FAM204A	1.61641e-08	FALSE	vRG	0.616759	0.580864
7.26162e-10	-0.0182343	0.152	0.202	1.9321e-05	DS_vs_CTL	RGMA	1.62581e-08	FALSE	vRG	0.810551	0.800383
7.31703e-10	0.134967	0.221	0.268	1.94684e-05	DS_vs_CTL	PRPSAP1	1.63414e-08	FALSE	vRG	1.13516	1.24661
7.40674e-10	-0.958641	0.081	0.173	1.97071e-05	DS_vs_CTL	COX7C	1.65007e-08	TRUE	vRG	0.587797	0.301968
7.42919e-10	-0.296328	0.231	0.336	1.97669e-05	DS_vs_CTL	RAB3GAP1	1.65022e-08	TRUE	vRG	1.46482	1.19267
7.44417e-10	-0.25571	0.19	0.285	1.98067e-05	DS_vs_CTL	CORO1C	1.65022e-08	TRUE	vRG	1.16376	0.974593
7.62989e-10	-0.53347	0.175	0.284	2.03008e-05	DS_vs_CTL	CDO1	1.68722e-08	TRUE	vRG	1.30327	0.900121
7.76761e-10	-0.64127	0.133	0.232	2.06673e-05	DS_vs_CTL	SPCS2	1.70943e-08	TRUE	vRG	1.01393	0.649734
7.76842e-10	-0.557351	0.154	0.27	2.06694e-05	DS_vs_CTL	RPL36	1.70943e-08	TRUE	vRG	0.991874	0.67372
7.91509e-10	-0.401809	0.05	0.104	2.10597e-05	DS_vs_CTL	TRABD	1.73745e-08	TRUE	vRG	0.251277	0.189967
8.05628e-10	-0.184836	0.129	0.191	2.14354e-05	DS_vs_CTL	FAM168B	1.76413e-08	FALSE	vRG	0.694282	0.610694
8.12684e-10	0.0111949	0.275	0.339	2.16231e-05	DS_vs_CTL	CDC73	1.77525e-08	FALSE	vRG	1.42756	1.43872
8.44295e-10	3.02924	0.059	0.009	2.24642e-05	DS_vs_CTL	AL035427.1	1.83787e-08	TRUE	vRG	0.0271715	0.22928
8.45446e-10	-0.165787	0.149	0.217	2.24948e-05	DS_vs_CTL	NDUFV1	1.83787e-08	FALSE	vRG	0.770268	0.686562
8.62428e-10	-0.483257	0.148	0.245	2.29466e-05	DS_vs_CTL	ELOVL5	1.87026e-08	TRUE	vRG	1.14083	0.815838
9.02702e-10	-0.431856	0.159	0.252	2.40182e-05	DS_vs_CTL	SMC3	1.95288e-08	TRUE	vRG	1.06949	0.792576
9.16461e-10	-0.157777	0.24	0.329	2.43843e-05	DS_vs_CTL	RAB1A	1.97788e-08	FALSE	vRG	1.3736	1.23122
9.39478e-10	0.824886	0.149	0.126	2.49967e-05	DS_vs_CTL	JUND	2.02269e-08	TRUE	vRG	0.39714	0.704317
9.46503e-10	0.102779	0.114	0.155	2.51836e-05	DS_vs_CTL	SLC25A37	2.03018e-08	FALSE	vRG	0.559236	0.600632
9.47479e-10	-0.150437	0.186	0.265	2.52096e-05	DS_vs_CTL	SUCO	2.03018e-08	FALSE	vRG	1.03162	0.929389
9.90871e-10	-0.323786	0.177	0.268	2.63641e-05	DS_vs_CTL	TMEFF1	2.1181e-08	TRUE	vRG	1.11963	0.894365
1.00479e-09	-0.197148	0.286	0.386	2.67346e-05	DS_vs_CTL	ROCK1	2.14276e-08	FALSE	vRG	1.667	1.45398
1.01308e-09	0.528236	0.572	0.499	2.6955e-05	DS_vs_CTL	ITSN1	2.15531e-08	TRUE	vRG	2.7258	3.93154
1.02633e-09	0.366929	0.424	0.416	2.73074e-05	DS_vs_CTL	TSC22D2	2.17833e-08	TRUE	vRG	2.18338	2.81602
1.03736e-09	-0.455239	0.072	0.138	2.7601e-05	DS_vs_CTL	FKBP8	2.19655e-08	TRUE	vRG	0.454244	0.331065
1.04599e-09	-0.697555	0.107	0.201	2.78306e-05	DS_vs_CTL	PRDX2	2.20962e-08	TRUE	vRG	0.770818	0.474927
1.04917e-09	0.35694	0.826	0.74	2.79153e-05	DS_vs_CTL	PRKG1	2.21114e-08	TRUE	vRG	9.076	11.624
1.05569e-09	-0.0553608	0.264	0.34	2.80886e-05	DS_vs_CTL	TOP2B	2.2161e-08	FALSE	vRG	1.38065	1.32866
1.05646e-09	-0.651546	0.253	0.386	2.81093e-05	DS_vs_CTL	SOX1-OT	2.2161e-08	TRUE	vRG	2.30255	1.46545
1.06263e-09	-1.08519	0.062	0.144	2.82733e-05	DS_vs_CTL	B2M	2.22384e-08	TRUE	vRG	0.606268	0.28523
1.0683e-09	-0.00815979	0.128	0.18	2.84244e-05	DS_vs_CTL	BSG	2.23052e-08	FALSE	vRG	0.625079	0.621573
1.07618e-09	0.0309872	0.158	0.209	2.8634e-05	DS_vs_CTL	MLH3	2.24176e-08	FALSE	vRG	0.809773	0.827401
1.08378e-09	-0.475059	0.069	0.129	2.8836e-05	DS_vs_CTL	TMEM47	2.25235e-08	TRUE	vRG	0.462351	0.332367
1.09462e-09	0.614229	0.428	0.371	2.91246e-05	DS_vs_CTL	PITPNC1	2.26963e-08	TRUE	vRG	2.31266	3.54066
1.10108e-09	0.0144147	0.189	0.244	2.92964e-05	DS_vs_CTL	AP3S1	2.27776e-08	FALSE	vRG	0.874775	0.883595
1.10646e-09	-0.108206	0.206	0.288	2.94395e-05	DS_vs_CTL	BTG1	2.28363e-08	FALSE	vRG	1.25547	1.1647
1.11936e-09	1.98124	0.083	0.032	2.97827e-05	DS_vs_CTL	SNX31	2.30495e-08	TRUE	vRG	0.118225	0.469877
1.14594e-09	0.00106691	0.258	0.322	3.04901e-05	DS_vs_CTL	AK3	2.3543e-08	FALSE	vRG	1.32567	1.32667
1.18808e-09	-0.827312	0.025	0.074	3.16113e-05	DS_vs_CTL	CCDC127	2.4353e-08	TRUE	vRG	0.228898	0.128575
1.20379e-09	-0.116671	0.143	0.207	3.20291e-05	DS_vs_CTL	CHKB	2.46187e-08	FALSE	vRG	0.696959	0.64276
1.20811e-09	-0.523829	0.113	0.197	3.21443e-05	DS_vs_CTL	SCCPDH	2.4651e-08	TRUE	vRG	0.752577	0.523144
1.2457e-09	0.0263048	0.326	0.401	3.31443e-05	DS_vs_CTL	ENC1	2.53603e-08	FALSE	vRG	1.88841	1.9232
1.25349e-09	3.54139	0.051	0.008	3.33517e-05	DS_vs_CTL	AC026329.1	2.54612e-08	TRUE	vRG	0.0247179	0.298855
1.27687e-09	0.181321	0.119	0.155	3.39736e-05	DS_vs_CTL	USP7	2.58775e-08	FALSE	vRG	0.449911	0.510328
1.304e-09	-0.120049	0.173	0.245	3.46956e-05	DS_vs_CTL	CBL	2.63395e-08	FALSE	vRG	1.05031	0.966392
1.30553e-09	-0.260895	0.094	0.154	3.47363e-05	DS_vs_CTL	IAH1	2.63395e-08	TRUE	vRG	0.510735	0.426098
1.32045e-09	0.166552	0.289	0.328	3.51333e-05	DS_vs_CTL	CCAR1	2.65808e-08	FALSE	vRG	1.3605	1.52714
1.35432e-09	0.333856	0.518	0.512	3.60344e-05	DS_vs_CTL	TOM1L2	2.72015e-08	TRUE	vRG	2.96951	3.74301
1.38193e-09	0.402182	0.376	0.357	3.6769e-05	DS_vs_CTL	LRIG1	2.76941e-08	TRUE	vRG	2.04422	2.7018
1.40695e-09	-0.134026	0.275	0.358	3.74346e-05	DS_vs_CTL	AP3B1	2.81326e-08	FALSE	vRG	1.72604	1.57285
1.41326e-09	0.0772442	0.211	0.26	3.76025e-05	DS_vs_CTL	FIP1L1	2.81961e-08	FALSE	vRG	0.989186	1.04367
1.42929e-09	-1.66345	0.022	0.084	3.80291e-05	DS_vs_CTL	MAGEF1	2.84527e-08	TRUE	vRG	0.261322	0.0818105
1.43437e-09	-0.199282	0.041	0.082	3.81644e-05	DS_vs_CTL	HNRNPH2	2.84907e-08	FALSE	vRG	0.241759	0.210459
1.44833e-09	-0.761692	0.058	0.127	3.85357e-05	DS_vs_CTL	NDUFA5	2.87045e-08	TRUE	vRG	0.4607	0.271322
1.46008e-09	-0.166147	0.339	0.439	3.88483e-05	DS_vs_CTL	MSI1	2.88735e-08	FALSE	vRG	2.32241	2.06969
1.46811e-09	-0.795741	0.056	0.129	3.90621e-05	DS_vs_CTL	NDUFB11	2.89686e-08	TRUE	vRG	0.405582	0.23322
1.53925e-09	-0.478471	0.188	0.296	4.09548e-05	DS_vs_CTL	RSRC2	3.03056e-08	TRUE	vRG	1.16441	0.835476
1.5437e-09	-0.145751	0.107	0.161	4.10732e-05	DS_vs_CTL	SIN3B	3.03268e-08	FALSE	vRG	0.537334	0.485626
1.55024e-09	0.387235	0.538	0.504	4.12473e-05	DS_vs_CTL	DYRK1A	3.035e-08	TRUE	vRG	2.91886	3.81787
1.55164e-09	-0.77467	0.057	0.132	4.12845e-05	DS_vs_CTL	TUFM	3.035e-08	TRUE	vRG	0.344997	0.201252
1.55634e-09	-0.173596	0.09	0.142	4.14096e-05	DS_vs_CTL	AKR1A1	3.03682e-08	FALSE	vRG	0.459144	0.406998
1.56195e-09	-0.314007	0.269	0.382	4.15588e-05	DS_vs_CTL	C11orf58	3.03682e-08	TRUE	vRG	1.71736	1.38127
1.56272e-09	-1.4031	0.025	0.088	4.15794e-05	DS_vs_CTL	EFNB1	3.03682e-08	TRUE	vRG	0.288923	0.108626
1.5753e-09	0.0640119	0.362	0.427	4.1914e-05	DS_vs_CTL	MON2	3.05465e-08	FALSE	vRG	2.01719	2.10878
1.58895e-09	0.113544	0.201	0.243	4.22771e-05	DS_vs_CTL	CCNT2	3.07447e-08	FALSE	vRG	0.838127	0.906865
1.59301e-09	0.0568948	0.216	0.27	4.23853e-05	DS_vs_CTL	KIF3A	3.07571e-08	FALSE	vRG	1.0175	1.0585
1.60226e-09	-0.246454	0.476	0.611	4.26313e-05	DS_vs_CTL	RTN1	3.08692e-08	FALSE	vRG	3.43857	2.89846
1.6224e-09	-0.699807	0.063	0.136	4.31672e-05	DS_vs_CTL	TMA7	3.11904e-08	TRUE	vRG	0.435029	0.267454
1.63037e-09	0.656247	0.414	0.294	4.33793e-05	DS_vs_CTL	KCNMA1	3.12351e-08	TRUE	vRG	1.7751	2.79814
1.6332e-09	-0.668095	0.067	0.138	4.34546e-05	DS_vs_CTL	PBXIP1	3.12351e-08	TRUE	vRG	0.479753	0.301567
1.6366e-09	-0.0745548	0.329	0.417	4.35451e-05	DS_vs_CTL	CELSR1	3.12351e-08	FALSE	vRG	2.26967	2.15533
1.6404e-09	-0.232841	0.419	0.539	4.3646e-05	DS_vs_CTL	PNN	3.12351e-08	FALSE	vRG	2.64117	2.24739
1.64212e-09	0.935319	0.294	0.215	4.36919e-05	DS_vs_CTL	AL078459.1	3.12351e-08	TRUE	vRG	1.0922	2.0896
1.66646e-09	0.107014	0.163	0.205	4.43395e-05	DS_vs_CTL	KPNA4	3.1631e-08	FALSE	vRG	0.779761	0.839905
1.69582e-09	-0.423081	0.123	0.209	4.51207e-05	DS_vs_CTL	CCT2	3.21204e-08	TRUE	vRG	0.756491	0.563975
1.7129e-09	0.631036	0.523	0.423	4.55751e-05	DS_vs_CTL	ATXN1	3.23756e-08	TRUE	vRG	2.46335	3.81553
1.73687e-09	-0.377102	0.12	0.2	4.62128e-05	DS_vs_CTL	QTRT1	3.27304e-08	TRUE	vRG	0.622035	0.478743
1.73896e-09	0.309141	0.194	0.217	4.62685e-05	DS_vs_CTL	FAM92A	3.27304e-08	TRUE	vRG	0.834105	1.0337
1.77009e-09	-0.202137	0.172	0.247	4.70969e-05	DS_vs_CTL	DECR1	3.32086e-08	FALSE	vRG	1.04418	0.907556
1.77177e-09	0.218383	0.408	0.441	4.71415e-05	DS_vs_CTL	PGAP1	3.32086e-08	FALSE	vRG	2.0516	2.38708
1.77756e-09	0.120167	0.291	0.339	4.72956e-05	DS_vs_CTL	XRN1	3.32478e-08	FALSE	vRG	1.50429	1.63506
1.82489e-09	0.0906305	0.237	0.287	4.8555e-05	DS_vs_CTL	PSME4	3.40622e-08	FALSE	vRG	1.19531	1.2729
1.83722e-09	0.100402	0.181	0.226	4.88829e-05	DS_vs_CTL	AC018730.1	3.42211e-08	FALSE	vRG	0.803277	0.861271
1.87602e-09	-0.592349	0.055	0.114	4.99153e-05	DS_vs_CTL	FGFR1OP2	3.48277e-08	TRUE	vRG	0.372805	0.246944
1.88149e-09	0.200432	0.196	0.226	5.00607e-05	DS_vs_CTL	MED15	3.48277e-08	FALSE	vRG	0.831081	0.955127
1.88354e-09	0.292189	0.097	0.133	5.01153e-05	DS_vs_CTL	APEX1	3.48277e-08	TRUE	vRG	0.334093	0.409354
1.88531e-09	0.0935937	0.202	0.255	5.01624e-05	DS_vs_CTL	YAF2	3.48277e-08	FALSE	vRG	1.08666	1.15958
1.89457e-09	-0.371177	0.182	0.278	5.04087e-05	DS_vs_CTL	CWF19L2	3.49269e-08	TRUE	vRG	1.20452	0.931069
1.97773e-09	-0.184114	0.191	0.274	5.26215e-05	DS_vs_CTL	TRIP11	3.63468e-08	FALSE	vRG	1.11756	0.983569
1.97968e-09	0.827076	0.171	0.152	5.26734e-05	DS_vs_CTL	C4orf47	3.63468e-08	TRUE	vRG	0.63267	1.12324
1.99489e-09	0.0829264	0.379	0.434	5.3078e-05	DS_vs_CTL	SRSF10	3.65513e-08	FALSE	vRG	2.03073	2.15097
2.00844e-09	-0.44544	0.283	0.409	5.34386e-05	DS_vs_CTL	TUBA1B	3.67246e-08	TRUE	vRG	1.90389	1.39789
2.01915e-09	0.061783	0.389	0.455	5.37236e-05	DS_vs_CTL	RBMX	3.68454e-08	FALSE	vRG	2.09997	2.19192
2.02457e-09	-0.2833	0.279	0.389	5.38679e-05	DS_vs_CTL	ECHDC2	3.68694e-08	TRUE	vRG	1.883	1.54712
2.03464e-09	-0.0589705	0.14	0.194	5.41356e-05	DS_vs_CTL	HADHA	3.69525e-08	FALSE	vRG	0.724816	0.69577
2.0389e-09	0.0689843	0.109	0.145	5.42491e-05	DS_vs_CTL	AC245297.3	3.69525e-08	FALSE	vRG	0.498721	0.523224
2.04149e-09	0.138019	0.217	0.256	5.43178e-05	DS_vs_CTL	CAND1	3.69525e-08	FALSE	vRG	0.960799	1.05739
2.13071e-09	-1.10067	0.055	0.134	5.66918e-05	DS_vs_CTL	PFN1	3.84318e-08	TRUE	vRG	0.494887	0.230237
2.13177e-09	-0.0481275	0.428	0.522	5.672e-05	DS_vs_CTL	WAC	3.84318e-08	FALSE	vRG	2.63802	2.55146
2.1503e-09	-0.0200777	0.239	0.31	5.7213e-05	DS_vs_CTL	RBBP4	3.86881e-08	FALSE	vRG	1.21516	1.19838
2.17518e-09	-0.344701	0.226	0.331	5.78751e-05	DS_vs_CTL	SNHG29	3.90576e-08	TRUE	vRG	1.29106	1.01648
2.22234e-09	0.386172	0.145	0.157	5.91298e-05	DS_vs_CTL	WHRN	3.98247e-08	TRUE	vRG	0.556559	0.727721
2.25453e-09	0.159007	0.205	0.242	5.99864e-05	DS_vs_CTL	BRWD3	4.03211e-08	FALSE	vRG	1.00257	1.11954
2.26336e-09	0.183548	0.317	0.352	6.02211e-05	DS_vs_CTL	DMTF1	4.03984e-08	FALSE	vRG	1.42036	1.61323
2.31309e-09	-0.664087	0.088	0.172	6.15444e-05	DS_vs_CTL	OAZ1	4.12042e-08	TRUE	vRG	0.514262	0.324187
2.32078e-09	0.655988	0.295	0.245	6.17489e-05	DS_vs_CTL	NR2F1	4.12184e-08	TRUE	vRG	1.07448	1.69368
2.32307e-09	0.276176	0.265	0.287	6.18098e-05	DS_vs_CTL	C2CD5	4.12184e-08	TRUE	vRG	1.13178	1.37081
2.3567e-09	-2.13448	0.014	0.068	6.27048e-05	DS_vs_CTL	LMO1	4.17327e-08	TRUE	vRG	0.317332	0.0714961
2.39807e-09	0.030819	0.18	0.233	6.38055e-05	DS_vs_CTL	ECPAS	4.23817e-08	FALSE	vRG	0.925386	0.945415
2.45578e-09	0.068086	0.285	0.342	6.53409e-05	DS_vs_CTL	GON4L	4.33163e-08	FALSE	vRG	1.52014	1.59368
2.49325e-09	0.275413	0.256	0.278	6.6338e-05	DS_vs_CTL	MAP3K4	4.38911e-08	TRUE	vRG	1.11412	1.3487
2.50989e-09	-0.803372	0.098	0.192	6.67807e-05	DS_vs_CTL	SCARA3	4.40974e-08	TRUE	vRG	0.836798	0.479075
2.55957e-09	-0.705695	0.172	0.287	6.81024e-05	DS_vs_CTL	CYP51A1	4.48824e-08	TRUE	vRG	1.44159	0.883529
2.57812e-09	1.10499	0.192	0.122	6.8596e-05	DS_vs_CTL	RHCG	4.51196e-08	TRUE	vRG	0.51884	1.11723
2.62296e-09	-0.693475	0.175	0.293	6.9789e-05	DS_vs_CTL	CCDC144A	4.5815e-08	TRUE	vRG	1.37559	0.850241
2.64361e-09	0.866348	0.381	0.255	7.03386e-05	DS_vs_CTL	MEF2C	4.60861e-08	TRUE	vRG	0.964797	1.75974
2.70573e-09	0.0386625	0.463	0.539	7.19914e-05	DS_vs_CTL	ARHGAP5	4.70092e-08	FALSE	vRG	3.26166	3.3503
2.70703e-09	0.797406	0.362	0.24	7.2026e-05	DS_vs_CTL	GRM7	4.70092e-08	TRUE	vRG	1.37973	2.39873
2.75893e-09	-0.364766	0.242	0.349	7.34069e-05	DS_vs_CTL	NOTCH1	4.78179e-08	TRUE	vRG	1.63838	1.27215
2.82544e-09	-0.0181576	0.136	0.189	7.51765e-05	DS_vs_CTL	CCM2	4.88763e-08	FALSE	vRG	0.737661	0.728447
2.8402e-09	-0.47307	0.072	0.135	7.55691e-05	DS_vs_CTL	CADM4	4.90371e-08	TRUE	vRG	0.426182	0.30677
2.86021e-09	0.0480854	0.276	0.35	7.61017e-05	DS_vs_CTL	SRSF7	4.91991e-08	FALSE	vRG	1.28701	1.33069
2.86054e-09	-0.601964	0.123	0.219	7.61104e-05	DS_vs_CTL	CHCHD2	4.91991e-08	TRUE	vRG	0.84394	0.555707
2.88581e-09	-0.348915	0.451	0.59	7.67826e-05	DS_vs_CTL	KIF21A	4.95387e-08	TRUE	vRG	3.69525	2.90122
2.97178e-09	-0.322496	0.041	0.088	7.90701e-05	DS_vs_CTL	C1orf122	5.09172e-08	TRUE	vRG	0.206722	0.16513
3.00679e-09	-0.214619	0.046	0.089	8.00016e-05	DS_vs_CTL	LSM2	5.14189e-08	FALSE	vRG	0.245745	0.211658
3.02206e-09	0.175186	0.131	0.158	8.04079e-05	DS_vs_CTL	MAD1L1	5.15818e-08	FALSE	vRG	0.574157	0.648445
3.05556e-09	0.231052	0.315	0.341	8.12994e-05	DS_vs_CTL	RUFY2	5.20547e-08	FALSE	vRG	1.39358	1.63584
3.12007e-09	1.59846	0.124	0.054	8.30156e-05	DS_vs_CTL	AP001011.1	5.3053e-08	TRUE	vRG	0.211312	0.642025
3.23229e-09	-0.296278	0.285	0.394	8.60017e-05	DS_vs_CTL	NAP1L4	5.48574e-08	TRUE	vRG	1.78623	1.45445
3.2661e-09	-1.33767	0.065	0.151	8.6901e-05	DS_vs_CTL	ZNF536	5.53264e-08	TRUE	vRG	0.872516	0.344617
3.30949e-09	0.42279	0.264	0.267	8.80555e-05	DS_vs_CTL	MTMR3	5.59559e-08	TRUE	vRG	1.08309	1.45228
3.32394e-09	0.515416	0.39	0.345	8.844e-05	DS_vs_CTL	MIRLET7BHG	5.60946e-08	TRUE	vRG	1.69455	2.42267
3.34244e-09	-1.25121	0.043	0.114	8.89323e-05	DS_vs_CTL	ANXA5	5.62219e-08	TRUE	vRG	0.417879	0.174973
3.34434e-09	-0.990145	0.031	0.087	8.89829e-05	DS_vs_CTL	KDM5D	5.62219e-08	TRUE	vRG	0.278786	0.139859
3.35027e-09	0.533014	0.499	0.441	8.91406e-05	DS_vs_CTL	JPX	5.62219e-08	TRUE	vRG	2.31469	3.34973
3.38332e-09	0.266889	0.07	0.093	9.00201e-05	DS_vs_CTL	RAB5C	5.66144e-08	TRUE	vRG	0.275308	0.33149
3.38627e-09	-0.568241	0.057	0.117	9.00984e-05	DS_vs_CTL	ZDBF2	5.66144e-08	TRUE	vRG	0.399714	0.26927
3.41183e-09	-0.523919	0.209	0.328	9.07786e-05	DS_vs_CTL	CFL1	5.69357e-08	TRUE	vRG	1.29204	0.898296
3.42533e-09	1.32757	0.159	0.096	9.11378e-05	DS_vs_CTL	FSIP2-AS1	5.7055e-08	TRUE	vRG	0.426417	1.07181
3.44666e-09	0.201893	0.564	0.591	9.17054e-05	DS_vs_CTL	WDFY3	5.7304e-08	FALSE	vRG	3.47926	4.00205
3.46339e-09	-0.624783	0.265	0.397	9.21505e-05	DS_vs_CTL	MN1	5.74757e-08	TRUE	vRG	2.01519	1.30655
3.51225e-09	-0.249822	0.358	0.471	9.34506e-05	DS_vs_CTL	HNRNPR	5.8179e-08	FALSE	vRG	2.21182	1.86
3.58516e-09	-0.939034	0.075	0.161	9.53903e-05	DS_vs_CTL	PPDPF	5.92361e-08	TRUE	vRG	0.590584	0.307567
3.59501e-09	0.0634322	0.252	0.304	9.56524e-05	DS_vs_CTL	RBM5	5.92361e-08	FALSE	vRG	1.03278	1.07927
3.59956e-09	-0.358978	0.191	0.284	9.57736e-05	DS_vs_CTL	DEK	5.92361e-08	TRUE	vRG	1.23292	0.961129
3.60247e-09	0.0243865	0.347	0.415	9.58508e-05	DS_vs_CTL	NCKAP1	5.92361e-08	FALSE	vRG	1.91262	1.94527
3.64234e-09	-0.370927	0.081	0.143	9.69118e-05	DS_vs_CTL	FAM114A1	5.97154e-08	TRUE	vRG	0.54199	0.418903
3.64492e-09	0.386145	0.559	0.522	9.69803e-05	DS_vs_CTL	BRWD1	5.97154e-08	TRUE	vRG	2.89648	3.78574
3.67888e-09	0.430664	0.192	0.194	9.78839e-05	DS_vs_CTL	TSC2	6.0162e-08	TRUE	vRG	0.638675	0.861226
3.69385e-09	0.118913	0.148	0.187	9.82823e-05	DS_vs_CTL	PPP2CB	6.02971e-08	FALSE	vRG	0.711393	0.772628
3.7034e-09	-0.047503	0.232	0.298	9.85364e-05	DS_vs_CTL	AKAP10	6.03433e-08	FALSE	vRG	1.25558	1.2149
3.76704e-09	-0.40222	0.276	0.402	0.00010023	DS_vs_CTL	RPLP0	6.12689e-08	TRUE	vRG	1.71532	1.29774
3.8092e-09	0.438157	0.096	0.117	0.000101351	DS_vs_CTL	PLXNB1	6.18426e-08	TRUE	vRG	0.27355	0.371018
3.85155e-09	1.2952	0.144	0.092	0.000102478	DS_vs_CTL	PDE5A	6.24174e-08	TRUE	vRG	0.286998	0.705859
3.91699e-09	-0.507572	0.278	0.408	0.000104219	DS_vs_CTL	PAK3	6.33635e-08	TRUE	vRG	2.32822	1.6374
3.93498e-09	-0.635497	0.242	0.371	0.000104698	DS_vs_CTL	RPL30	6.35401e-08	TRUE	vRG	1.75579	1.12989
3.9712e-09	-0.35525	0.114	0.192	0.000105662	DS_vs_CTL	CCT6A	6.40098e-08	TRUE	vRG	0.762452	0.595834
3.9916e-09	0.38932	0.25	0.251	0.000106205	DS_vs_CTL	MORC3	6.42233e-08	TRUE	vRG	1.01306	1.32723
4.0726e-09	-0.13185	0.111	0.17	0.00010836	DS_vs_CTL	DHX34	6.54093e-08	FALSE	vRG	0.641837	0.585714
4.10463e-09	0.222468	0.149	0.178	0.000109212	DS_vs_CTL	DHX29	6.5806e-08	FALSE	vRG	0.679137	0.792566
4.14001e-09	-0.330996	0.112	0.184	0.000110153	DS_vs_CTL	PCNP	6.6255e-08	TRUE	vRG	0.634286	0.504062
4.16212e-09	0.377574	0.225	0.237	0.000110741	DS_vs_CTL	NSUN7	6.64902e-08	TRUE	vRG	1.07751	1.40019
4.18648e-09	0.281786	0.174	0.198	0.00011139	DS_vs_CTL	STAT3	6.67606e-08	TRUE	vRG	0.839545	1.02088
4.24872e-09	-0.74294	0.082	0.164	0.000113046	DS_vs_CTL	LAPTM4A	6.76331e-08	TRUE	vRG	0.610985	0.364684
4.27077e-09	-0.374864	0.115	0.188	0.000113632	DS_vs_CTL	COBL	6.78636e-08	TRUE	vRG	0.883155	0.680857
4.28474e-09	0.00942893	0.258	0.322	0.000114004	DS_vs_CTL	KIAA0319L	6.79653e-08	FALSE	vRG	1.46284	1.47246
4.31014e-09	-1.89089	0.021	0.081	0.00011468	DS_vs_CTL	LOX	6.82477e-08	TRUE	vRG	0.342524	0.0916258
4.33529e-09	0.185388	0.189	0.219	0.000115349	DS_vs_CTL	USP14	6.85251e-08	FALSE	vRG	0.804743	0.91526
4.3452e-09	-0.000514686	0.203	0.262	0.000115613	DS_vs_CTL	CBX5	6.85609e-08	FALSE	vRG	0.982807	0.982482
4.361e-09	-0.728786	0.243	0.371	0.000116033	DS_vs_CTL	PCDH11X	6.86896e-08	TRUE	vRG	2.60093	1.56904
4.37284e-09	-0.427898	0.331	0.463	0.000116348	DS_vs_CTL	CCNI	6.87555e-08	TRUE	vRG	2.32044	1.72465
4.4586e-09	-0.372068	0.163	0.265	0.00011863	DS_vs_CTL	TMEM259	6.98994e-08	TRUE	vRG	0.652749	0.504152
4.46117e-09	-0.242031	0.186	0.266	0.000118698	DS_vs_CTL	PDGFRB	6.98994e-08	FALSE	vRG	1.21976	1.03124
4.49155e-09	-1.66394	0.02	0.077	0.000119507	DS_vs_CTL	DDIT4	7.02529e-08	TRUE	vRG	0.349144	0.109497
4.52751e-09	-1.23458	0.118	0.21	0.000120464	DS_vs_CTL	PTPRN2	7.04342e-08	TRUE	vRG	0.950966	0.403557
4.52886e-09	-0.0991238	0.093	0.143	0.000120499	DS_vs_CTL	EIF3K	7.04342e-08	FALSE	vRG	0.490639	0.458017
4.53569e-09	-0.413947	0.113	0.188	0.000120681	DS_vs_CTL	SLC25A6	7.04342e-08	TRUE	vRG	0.656334	0.492389
4.53586e-09	-0.0878844	0.085	0.137	0.000120686	DS_vs_CTL	ARL6IP4	7.04342e-08	FALSE	vRG	0.314933	0.296285
4.5445e-09	-0.540427	0.188	0.299	0.000120916	DS_vs_CTL	PRIM2	7.04342e-08	TRUE	vRG	1.56155	1.07337
4.55022e-09	-0.771583	0.029	0.078	0.000121068	DS_vs_CTL	OST4	7.04342e-08	TRUE	vRG	0.215746	0.125974
4.71224e-09	0.345649	0.236	0.245	0.000125378	DS_vs_CTL	RHOQ	7.28166e-08	TRUE	vRG	1.05741	1.34398
4.87917e-09	-0.326956	0.231	0.346	0.00012982	DS_vs_CTL	EEF1G	7.52666e-08	TRUE	vRG	1.37377	1.09501
4.93488e-09	-0.141889	0.226	0.299	0.000131302	DS_vs_CTL	RHEB	7.59954e-08	FALSE	vRG	1.23394	1.11829
4.95062e-09	0.367543	0.254	0.27	0.000131721	DS_vs_CTL	FAM171A1	7.61072e-08	TRUE	vRG	1.09113	1.40805
5.04528e-09	-0.294785	0.311	0.428	0.00013424	DS_vs_CTL	CHCHD3	7.72965e-08	TRUE	vRG	2.15074	1.7531
5.04656e-09	-0.210901	0.138	0.203	0.000134274	DS_vs_CTL	ANKRD13D	7.72965e-08	FALSE	vRG	0.734124	0.634165
5.0538e-09	-0.0168493	0.193	0.251	0.000134467	DS_vs_CTL	WDR35	7.72965e-08	FALSE	vRG	1.10188	1.0891
5.09614e-09	-0.524016	0.157	0.257	0.000135593	DS_vs_CTL	PXDN	7.78115e-08	TRUE	vRG	1.04739	0.728102
5.14578e-09	-0.369908	0.097	0.165	0.000136914	DS_vs_CTL	MEST	7.83876e-08	TRUE	vRG	0.678841	0.525099
5.1632e-09	1.80825	0.098	0.035	0.000137377	DS_vs_CTL	PAXBP1-AS1	7.83876e-08	TRUE	vRG	0.119581	0.421415
5.16356e-09	-0.48292	0.068	0.13	0.000137387	DS_vs_CTL	PRKAR1A	7.83876e-08	TRUE	vRG	0.447404	0.31986
5.1688e-09	0.649709	0.158	0.145	0.000137526	DS_vs_CTL	LRRN1	7.83876e-08	TRUE	vRG	0.547327	0.85929
5.19652e-09	-1.5822	0.073	0.158	0.000138264	DS_vs_CTL	AK5	7.86751e-08	TRUE	vRG	1.15751	0.385908
5.27014e-09	-0.133226	0.184	0.255	0.000140223	DS_vs_CTL	NDUFS4	7.96554e-08	FALSE	vRG	1.01375	0.924263
5.3456e-09	-0.213653	0.622	0.75	0.00014223	DS_vs_CTL	ACTG1	8.06601e-08	FALSE	vRG	5.40206	4.65836
5.3814e-09	-0.00243961	0.146	0.196	0.000143183	DS_vs_CTL	LYPLAL1	8.1064e-08	FALSE	vRG	0.759442	0.758182
5.42752e-09	-0.424259	0.441	0.58	0.00014441	DS_vs_CTL	SOX4	8.15684e-08	TRUE	vRG	3.64778	2.71817
5.43305e-09	0.641871	0.213	0.189	0.000144557	DS_vs_CTL	NRIP1	8.15684e-08	TRUE	vRG	0.790208	1.23361
5.49299e-09	0.148473	0.099	0.134	0.000146152	DS_vs_CTL	CCS	8.23307e-08	FALSE	vRG	0.367595	0.407578
5.57981e-09	-0.00628645	0.122	0.17	0.000148462	DS_vs_CTL	DPP8	8.34925e-08	FALSE	vRG	0.646233	0.643444
5.69302e-09	0.328511	0.627	0.602	0.000151474	DS_vs_CTL	GNAQ	8.50449e-08	TRUE	vRG	3.74901	4.70799
5.77234e-09	-0.0166828	0.179	0.242	0.000153585	DS_vs_CTL	DNASE1	8.60866e-08	FALSE	vRG	0.966698	0.955597
5.80527e-09	-0.884563	0.113	0.212	0.000154461	DS_vs_CTL	HSPE1	8.6434e-08	TRUE	vRG	0.923025	0.499507
5.84265e-09	-0.635037	0.043	0.098	0.000155455	DS_vs_CTL	RNF40	8.66623e-08	TRUE	vRG	0.304569	0.195775
5.84797e-09	-1.50113	0.04	0.113	0.000155597	DS_vs_CTL	AC008415.1	8.66623e-08	TRUE	vRG	1.00663	0.354972
5.84956e-09	0.763655	0.307	0.241	0.000155639	DS_vs_CTL	PCSK5	8.66623e-08	TRUE	vRG	1.17992	2.00401
5.93071e-09	-0.0995531	0.131	0.185	0.000157798	DS_vs_CTL	CREBZF	8.77016e-08	FALSE	vRG	0.560695	0.523265
5.93925e-09	0.560143	0.162	0.156	0.000158026	DS_vs_CTL	NUMA1	8.77016e-08	TRUE	vRG	0.507696	0.749072
5.96989e-09	-0.145242	0.249	0.328	0.000158841	DS_vs_CTL	CHD1	8.79977e-08	FALSE	vRG	1.49182	1.34887
5.9789e-09	-1.01079	0.778	0.797	0.000159081	DS_vs_CTL	DLGAP1	8.79977e-08	TRUE	vRG	30.8174	15.2934
6.04817e-09	-0.10684	0.103	0.152	0.000160924	DS_vs_CTL	CFAP97	8.88715e-08	FALSE	vRG	0.601978	0.55896
6.10882e-09	0.141802	0.328	0.37	0.000162537	DS_vs_CTL	SECISBP2	8.95089e-08	FALSE	vRG	1.59157	1.75608
6.11149e-09	-0.390739	0.106	0.176	0.000162608	DS_vs_CTL	PPIB	8.95089e-08	TRUE	vRG	0.680809	0.519059
6.14086e-09	0.169794	0.127	0.156	0.00016339	DS_vs_CTL	CEP70	8.97925e-08	FALSE	vRG	0.524629	0.590309
6.20495e-09	0.614872	0.107	0.124	0.000165095	DS_vs_CTL	RHOT2	9.05822e-08	TRUE	vRG	0.236465	0.362704
6.22998e-09	1.58928	0.127	0.056	0.000165761	DS_vs_CTL	FSIP2	9.07999e-08	TRUE	vRG	0.256215	0.773056
6.29021e-09	-0.467779	0.096	0.168	0.000167364	DS_vs_CTL	CPNE1	9.15292e-08	TRUE	vRG	0.513704	0.371185
6.3663e-09	0.3831	0.279	0.293	0.000169388	DS_vs_CTL	MAPT	9.22779e-08	TRUE	vRG	1.13316	1.47814
6.37213e-09	-0.4103	0.462	0.599	0.000169543	DS_vs_CTL	GABPB1-AS1	9.22779e-08	TRUE	vRG	3.90568	2.93867
6.38352e-09	-0.164614	0.15	0.213	0.000169846	DS_vs_CTL	LRP5	9.22779e-08	FALSE	vRG	0.877245	0.782563
6.38571e-09	0.569995	0.188	0.172	0.000169905	DS_vs_CTL	PHLDB1	9.22779e-08	TRUE	vRG	0.560285	0.832281
6.39305e-09	-0.202777	0.265	0.356	0.0001701	DS_vs_CTL	LUC7L	9.22779e-08	FALSE	vRG	1.45432	1.26352
6.44429e-09	0.48006	0.285	0.268	0.000171463	DS_vs_CTL	RYK	9.28682e-08	TRUE	vRG	1.08515	1.51401
6.50826e-09	-0.0562874	0.138	0.185	0.000173165	DS_vs_CTL	NELFCD	9.36397e-08	FALSE	vRG	0.621018	0.597241
6.55678e-09	-0.99798	0.052	0.122	0.000174456	DS_vs_CTL	PHLDA1	9.41869e-08	TRUE	vRG	0.460258	0.229959
6.72854e-09	-0.593025	0.139	0.237	0.000179026	DS_vs_CTL	PPIA	9.64285e-08	TRUE	vRG	0.864351	0.572698
6.73431e-09	0.158867	0.475	0.519	0.00017918	DS_vs_CTL	PPP1R12A	9.64285e-08	FALSE	vRG	2.79121	3.11628
6.76034e-09	0.0337371	0.115	0.164	0.000179872	DS_vs_CTL	G3BP2	9.6647e-08	FALSE	vRG	0.572363	0.585955
6.78267e-09	-0.0356602	0.226	0.289	0.000180466	DS_vs_CTL	LRRFIP1	9.68121e-08	FALSE	vRG	1.20639	1.17694
6.87923e-09	-0.126529	0.216	0.287	0.000183036	DS_vs_CTL	PPP1CB	9.80345e-08	FALSE	vRG	1.22184	1.11918
6.97751e-09	0.792666	0.132	0.111	0.000185651	DS_vs_CTL	THSD1	9.92775e-08	TRUE	vRG	0.381308	0.661314
7.09478e-09	-0.257222	0.279	0.38	0.000188771	DS_vs_CTL	UBXN4	1.00786e-07	TRUE	vRG	1.66264	1.39099
7.1157e-09	-0.139948	0.219	0.291	0.000189327	DS_vs_CTL	ATF2	1.00924e-07	FALSE	vRG	1.16191	1.05442
7.13294e-09	0.0423618	0.14	0.179	0.000189786	DS_vs_CTL	ORMDL1	1.01009e-07	FALSE	vRG	0.593298	0.611033
7.20663e-09	-0.250781	0.222	0.308	0.000191747	DS_vs_CTL	EEF1D	1.01892e-07	TRUE	vRG	1.26415	1.0623
7.22884e-09	-0.0286576	0.146	0.195	0.000192338	DS_vs_CTL	ZNF709	1.02045e-07	FALSE	vRG	0.798581	0.78288
7.35686e-09	0.145601	0.238	0.28	0.000195744	DS_vs_CTL	PJA2	1.03689e-07	FALSE	vRG	1.14569	1.26749
7.39062e-09	-0.0168607	0.113	0.157	0.000196642	DS_vs_CTL	TARDBP	1.04001e-07	FALSE	vRG	0.480109	0.474544
7.55527e-09	-0.168029	0.187	0.258	0.000201023	DS_vs_CTL	NEK7	1.06152e-07	FALSE	vRG	1.16505	1.03687
7.63248e-09	0.127808	0.182	0.221	0.000203077	DS_vs_CTL	ILK	1.07069e-07	FALSE	vRG	0.881241	0.962994
7.661e-09	-0.404736	0.1	0.17	0.000203836	DS_vs_CTL	CEP135	1.07302e-07	TRUE	vRG	0.669966	0.505847
7.78271e-09	-0.7564	0.111	0.207	0.000207075	DS_vs_CTL	PLD5	1.08837e-07	TRUE	vRG	1.09825	0.649734
7.80899e-09	0.00467615	0.09	0.13	0.000207774	DS_vs_CTL	ARFGAP2	1.08926e-07	FALSE	vRG	0.418776	0.420164
7.81338e-09	-0.217422	0.114	0.174	0.000207891	DS_vs_CTL	ZNF718	1.08926e-07	FALSE	vRG	0.626293	0.538555
7.84069e-09	-0.0347228	0.427	0.518	0.000208617	DS_vs_CTL	TAF15	1.08969e-07	FALSE	vRG	2.70629	2.64193
7.84072e-09	-0.158611	0.199	0.273	0.000208618	DS_vs_CTL	ZNF84	1.08969e-07	FALSE	vRG	0.985741	0.88303
8.06773e-09	0.0526073	0.322	0.385	0.000214658	DS_vs_CTL	ZC2HC1A	1.11951e-07	FALSE	vRG	1.51306	1.56931
8.18547e-09	0.073911	0.165	0.207	0.000217791	DS_vs_CTL	AL683813.1	1.13409e-07	FALSE	vRG	0.839787	0.884011
8.25635e-09	-0.232858	0.151	0.223	0.000219677	DS_vs_CTL	COMT	1.14215e-07	FALSE	vRG	0.85715	0.72926
8.26971e-09	-0.112788	0.254	0.33	0.000220032	DS_vs_CTL	ATM	1.14224e-07	FALSE	vRG	1.46745	1.35705
8.30759e-09	0.589248	0.616	0.547	0.00022104	DS_vs_CTL	AFF3	1.14571e-07	TRUE	vRG	3.3286	5.0083
8.34324e-09	0.0373452	0.171	0.219	0.000221989	DS_vs_CTL	USP46	1.14886e-07	FALSE	vRG	0.80729	0.828512
8.40287e-09	-0.207787	0.52	0.643	0.000223575	DS_vs_CTL	HNRNPA2B1	1.1553e-07	FALSE	vRG	3.31992	2.87449
8.54471e-09	0.0515488	0.559	0.632	0.000227349	DS_vs_CTL	USP34	1.173e-07	FALSE	vRG	3.79319	3.93124
8.56066e-09	-0.675345	0.106	0.2	0.000227774	DS_vs_CTL	HBG2	1.1734e-07	TRUE	vRG	0.898021	0.561963
8.66327e-09	-1.40033	0.076	0.159	0.000230504	DS_vs_CTL	AC013391.2	1.18565e-07	TRUE	vRG	0.968954	0.366462
8.69839e-09	-0.595901	0.222	0.344	0.000231438	DS_vs_CTL	POU3F3	1.18865e-07	TRUE	vRG	1.66628	1.10213
8.87956e-09	-1.28618	0.015	0.062	0.000236258	DS_vs_CTL	COPS9	1.21156e-07	TRUE	vRG	0.149169	0.060578
8.89768e-09	-0.359223	0.32	0.45	0.00023674	DS_vs_CTL	RPS3A	1.21219e-07	TRUE	vRG	2.12691	1.6579
9.02003e-09	-0.38519	0.28	0.401	0.000239996	DS_vs_CTL	RPL32	1.227e-07	TRUE	vRG	1.9946	1.527
9.11051e-09	-0.0694696	0.259	0.334	0.000242403	DS_vs_CTL	RLF	1.23743e-07	FALSE	vRG	1.606	1.53047
9.12817e-09	-0.165145	0.21	0.284	0.000242873	DS_vs_CTL	PSAT1	1.23796e-07	FALSE	vRG	1.25392	1.11821
9.15716e-09	0.235724	0.267	0.301	0.000243644	DS_vs_CTL	FOXK2	1.24001e-07	FALSE	vRG	1.25096	1.47322
9.24673e-09	-1.60517	0.027	0.089	0.000246028	DS_vs_CTL	NDUFC1	1.25026e-07	TRUE	vRG	0.327865	0.107097
9.35016e-09	-0.204081	0.181	0.27	0.00024878	DS_vs_CTL	RPL17	1.26234e-07	FALSE	vRG	0.977942	0.848832
9.76052e-09	-0.429998	0.161	0.253	0.000259698	DS_vs_CTL	SMARCA5	1.31577e-07	TRUE	vRG	1.05781	0.784931
9.86016e-09	-0.854812	0.071	0.148	0.000262349	DS_vs_CTL	PIK3R3	1.32699e-07	TRUE	vRG	0.636579	0.35155
9.87938e-09	2.8266	0.06	0.012	0.000262861	DS_vs_CTL	TTN	1.32699e-07	TRUE	vRG	0.0433763	0.31406
9.88816e-09	-0.117953	0.069	0.112	0.000263094	DS_vs_CTL	PTP4A2	1.32699e-07	FALSE	vRG	0.349337	0.321856
1.00375e-08	0.352286	0.184	0.197	0.000267067	DS_vs_CTL	URGCP	1.34502e-07	TRUE	vRG	0.762024	0.973097
1.00736e-08	-0.542205	0.313	0.445	0.000268028	DS_vs_CTL	CCND2	1.34785e-07	TRUE	vRG	2.40349	1.65023
1.00927e-08	-0.370162	0.418	0.553	0.000268536	DS_vs_CTL	ANKRD36C	1.34839e-07	TRUE	vRG	3.1628	2.44684
1.01336e-08	-1.06726	0.02	0.068	0.000269625	DS_vs_CTL	TRMT112	1.34878e-07	TRUE	vRG	0.181746	0.0862164
1.01364e-08	-0.0580326	0.277	0.35	0.000269699	DS_vs_CTL	CREB1	1.34878e-07	FALSE	vRG	1.57525	1.51313
1.01406e-08	0.404785	0.161	0.169	0.000269811	DS_vs_CTL	DNM2	1.34878e-07	TRUE	vRG	0.624168	0.826692
1.06109e-08	0.250509	0.547	0.571	0.000282324	DS_vs_CTL	CNKSR2	1.40866e-07	TRUE	vRG	3.68407	4.38289
1.06222e-08	1.66627	0.115	0.049	0.000282626	DS_vs_CTL	STAG3	1.40866e-07	TRUE	vRG	0.16835	0.536611
1.07379e-08	-0.254412	0.129	0.2	0.000285703	DS_vs_CTL	TCAF1	1.4219e-07	TRUE	vRG	0.689578	0.57795
1.07965e-08	0.166429	0.038	0.064	0.000287263	DS_vs_CTL	NECAB3	1.42756e-07	FALSE	vRG	0.145408	0.163341
1.08809e-08	0.0346564	0.383	0.443	0.000289509	DS_vs_CTL	MAP4K5	1.4366e-07	FALSE	vRG	2.14728	2.19954
1.09311e-08	0.211596	0.328	0.355	0.000290845	DS_vs_CTL	FNBP1	1.44111e-07	FALSE	vRG	1.5145	1.75393
1.0983e-08	-0.305156	0.091	0.151	0.000292226	DS_vs_CTL	MCMBP	1.44583e-07	TRUE	vRG	0.565273	0.457334
1.1045e-08	0.390927	0.229	0.224	0.000293873	DS_vs_CTL	TMEM165	1.45185e-07	TRUE	vRG	0.89314	1.17146
1.11339e-08	-0.00508516	0.365	0.44	0.00029624	DS_vs_CTL	LSM14A	1.46141e-07	FALSE	vRG	2.17346	2.16584
1.11963e-08	-0.263461	0.141	0.205	0.000297899	DS_vs_CTL	GLUD1	1.46745e-07	TRUE	vRG	0.835098	0.695562
1.12736e-08	0.178714	0.115	0.146	0.000299957	DS_vs_CTL	USP28	1.47427e-07	FALSE	vRG	0.519894	0.588617
1.12812e-08	0.108133	0.139	0.174	0.000300158	DS_vs_CTL	RGS22	1.47427e-07	FALSE	vRG	0.75952	0.818741
1.13657e-08	-0.0804336	0.194	0.252	0.000302407	DS_vs_CTL	EIF2AK2	1.48316e-07	FALSE	vRG	1.06215	1.00452
1.15637e-08	-0.0197617	0.204	0.256	0.000307676	DS_vs_CTL	RIC1	1.50681e-07	FALSE	vRG	1.07479	1.06018
1.18168e-08	-0.17212	0.244	0.332	0.000314409	DS_vs_CTL	HDGFL3	1.53755e-07	FALSE	vRG	1.37603	1.22119
1.19789e-08	-0.150621	0.117	0.188	0.000318723	DS_vs_CTL	PFDN5	1.55639e-07	FALSE	vRG	0.550705	0.496032
1.20918e-08	0.0832995	0.383	0.446	0.000321727	DS_vs_CTL	PPP6R2	1.56626e-07	FALSE	vRG	2.33438	2.47322
1.21034e-08	-0.82549	0.111	0.211	0.000322035	DS_vs_CTL	NDUFA13	1.56626e-07	TRUE	vRG	0.691332	0.389685
1.21072e-08	0.880473	0.166	0.127	0.000322135	DS_vs_CTL	MTMR12	1.56626e-07	TRUE	vRG	0.46149	0.850491
1.21261e-08	-0.94158	0.055	0.124	0.00032264	DS_vs_CTL	TBL1Y	1.56645e-07	TRUE	vRG	0.612413	0.318388
1.24134e-08	-1.81791	0.025	0.086	0.000330282	DS_vs_CTL	LGR4	1.60125e-07	TRUE	vRG	0.462657	0.130507
1.25293e-08	-0.511504	0.23	0.351	0.000333367	DS_vs_CTL	RPL24	1.61112e-07	TRUE	vRG	1.37684	0.965555
1.25361e-08	0.644282	0.141	0.067	0.000333547	DS_vs_CTL	FRMPD4	1.61112e-07	TRUE	vRG	0.317502	0.496852
1.25451e-08	0.0641372	0.052	0.083	0.000333788	DS_vs_CTL	PRDX6	1.61112e-07	FALSE	vRG	0.231748	0.242355
1.25616e-08	-0.402332	0.391	0.524	0.000334227	DS_vs_CTL	XPR1	1.61112e-07	TRUE	vRG	2.79338	2.11334
1.26243e-08	-1.91269	0.014	0.065	0.000335896	DS_vs_CTL	ABI3BP	1.61685e-07	TRUE	vRG	0.282728	0.0743552
1.26974e-08	-1.11552	0.074	0.16	0.00033784	DS_vs_CTL	DBI	1.62389e-07	TRUE	vRG	0.671319	0.309297
1.27198e-08	0.705633	0.173	0.144	0.000338436	DS_vs_CTL	LTN1	1.62445e-07	TRUE	vRG	0.513468	0.838074
1.27519e-08	0.459276	0.109	0.118	0.000339291	DS_vs_CTL	CCZ1	1.62623e-07	TRUE	vRG	0.389364	0.535731
1.27976e-08	-0.969716	0.172	0.276	0.000340506	DS_vs_CTL	AFF2	1.62974e-07	TRUE	vRG	1.63019	0.831902
1.29007e-08	0.154162	0.17	0.203	0.00034325	DS_vs_CTL	AC005562.1	1.64055e-07	FALSE	vRG	0.794619	0.884375
1.29569e-08	0.743581	0.085	0.082	0.000344744	DS_vs_CTL	GPR180	1.64536e-07	TRUE	vRG	0.250758	0.420576
1.30517e-08	0.0695835	0.353	0.405	0.000347267	DS_vs_CTL	SPEN	1.65506e-07	FALSE	vRG	1.89466	1.98836
1.3086e-08	-0.0354087	0.27	0.345	0.00034818	DS_vs_CTL	OCIAD1	1.65707e-07	FALSE	vRG	1.44754	1.41245
1.31381e-08	0.140536	0.08	0.106	0.000349565	DS_vs_CTL	WWC3	1.66069e-07	FALSE	vRG	0.336536	0.3711
1.31516e-08	-0.163432	0.131	0.192	0.000349926	DS_vs_CTL	SRSF1	1.66069e-07	FALSE	vRG	0.55193	0.492731
1.33202e-08	-0.478371	0.119	0.2	0.00035441	DS_vs_CTL	AL035530.2	1.67962e-07	TRUE	vRG	0.870013	0.624217
1.34403e-08	0.571551	0.483	0.36	0.000357607	DS_vs_CTL	NFIA-AS2	1.69239e-07	TRUE	vRG	2.51811	3.74274
1.36202e-08	0.0291681	0.216	0.273	0.000362394	DS_vs_CTL	TMEM87A	1.71264e-07	FALSE	vRG	1.14953	1.17305
1.37908e-08	-0.199785	0.206	0.284	0.000366932	DS_vs_CTL	PPIG	1.73166e-07	FALSE	vRG	1.2252	1.06665
1.4027e-08	-0.318161	0.139	0.213	0.000373217	DS_vs_CTL	ACTR3	1.75886e-07	TRUE	vRG	0.770256	0.617635
1.41972e-08	-0.539954	0.09	0.163	0.000377746	DS_vs_CTL	FOXRED1	1.77772e-07	TRUE	vRG	0.552237	0.379526
1.42384e-08	-0.512249	0.039	0.085	0.000378842	DS_vs_CTL	CDK2AP1	1.7804e-07	TRUE	vRG	0.251573	0.1761
1.46045e-08	-0.0100974	0.205	0.255	0.000388582	DS_vs_CTL	CHM	1.82363e-07	FALSE	vRG	1.0076	1.00059
1.46299e-08	-0.384503	0.084	0.144	0.000389259	DS_vs_CTL	LITAF	1.82427e-07	TRUE	vRG	0.556893	0.426387
1.49003e-08	-0.147804	0.193	0.269	0.000396454	DS_vs_CTL	ERICH1	1.85541e-07	FALSE	vRG	1.10617	0.998382
1.5013e-08	-0.240895	0.064	0.11	0.00039945	DS_vs_CTL	ALDH3A2	1.86685e-07	FALSE	vRG	0.359939	0.304453
1.50479e-08	-0.258243	0.187	0.271	0.000400379	DS_vs_CTL	ANAPC16	1.86834e-07	TRUE	vRG	1.16037	0.970045
1.50666e-08	0.133999	0.191	0.226	0.000400876	DS_vs_CTL	TMEM245	1.86834e-07	FALSE	vRG	0.862553	0.946632
1.51275e-08	-0.666125	0.038	0.091	0.000402499	DS_vs_CTL	PCBP1	1.87331e-07	TRUE	vRG	0.252058	0.158488
1.52949e-08	-0.774755	0.058	0.124	0.000406951	DS_vs_CTL	AARSD1	1.88999e-07	TRUE	vRG	0.421049	0.245692
1.53043e-08	-0.146412	0.265	0.346	0.000407201	DS_vs_CTL	DICER1	1.88999e-07	FALSE	vRG	1.4463	1.30665
1.58057e-08	0.0213304	0.233	0.287	0.000420542	DS_vs_CTL	RAP1GDS1	1.94922e-07	FALSE	vRG	1.32278	1.34252
1.58399e-08	-0.341389	0.106	0.175	0.000421453	DS_vs_CTL	RHOA	1.95076e-07	TRUE	vRG	0.660837	0.521393
1.59474e-08	-0.583982	0.121	0.207	0.000424313	DS_vs_CTL	CD99	1.96131e-07	TRUE	vRG	0.935289	0.62363
1.636e-08	-0.480096	0.119	0.2	0.000435291	DS_vs_CTL	COPB1	2.00684e-07	TRUE	vRG	0.817534	0.585846
1.63623e-08	-0.22055	0.188	0.27	0.000435352	DS_vs_CTL	ADAM17	2.00684e-07	FALSE	vRG	1.1351	0.974062
1.64176e-08	-0.883884	0.082	0.166	0.000436824	DS_vs_CTL	RPS10	2.01088e-07	TRUE	vRG	0.630741	0.341353
1.7179e-08	0.198882	0.127	0.157	0.000457082	DS_vs_CTL	ARF4	2.10127e-07	FALSE	vRG	0.55892	0.641711
1.72344e-08	0.641064	0.221	0.221	0.000458555	DS_vs_CTL	SLC2A3	2.10517e-07	TRUE	vRG	1.46302	2.28216
1.72604e-08	-0.197577	0.276	0.364	0.000459248	DS_vs_CTL	SEC31A	2.10549e-07	FALSE	vRG	1.67111	1.45712
1.76015e-08	-0.358212	0.116	0.186	0.000468322	DS_vs_CTL	WBP4	2.14418e-07	TRUE	vRG	0.741917	0.57859
1.78796e-08	0.0747411	0.239	0.285	0.000475723	DS_vs_CTL	MYEF2	2.17511e-07	FALSE	vRG	0.989809	1.04252
1.79792e-08	-1.04414	0.039	0.102	0.000478373	DS_vs_CTL	KIAA1586	2.1838e-07	TRUE	vRG	0.380218	0.183871
1.79997e-08	-0.722123	0.048	0.108	0.000478917	DS_vs_CTL	KCNG1	2.1838e-07	TRUE	vRG	0.342527	0.207258
1.83132e-08	0.0110837	0.066	0.102	0.000487259	DS_vs_CTL	CD164	2.21883e-07	FALSE	vRG	0.322902	0.325425
1.85086e-08	0.0519351	0.294	0.342	0.000492459	DS_vs_CTL	SF1	2.23949e-07	FALSE	vRG	1.40976	1.4615
1.87937e-08	-1.17472	0.035	0.096	0.000500044	DS_vs_CTL	ITM2C	2.27093e-07	TRUE	vRG	0.364954	0.161111
1.89818e-08	-0.603399	0.262	0.387	0.000505049	DS_vs_CTL	LAMA3	2.29057e-07	TRUE	vRG	2.42421	1.59529
1.90918e-08	-0.1206	0.146	0.207	0.000507974	DS_vs_CTL	ARL17B	2.30075e-07	FALSE	vRG	0.929485	0.854887
1.92312e-08	-0.00358798	0.393	0.469	0.000511684	DS_vs_CTL	RSF1	2.31444e-07	FALSE	vRG	2.34541	2.33961
1.93308e-08	-0.0880094	0.066	0.107	0.000514336	DS_vs_CTL	CUEDC2	2.31963e-07	FALSE	vRG	0.319906	0.300937
1.9336e-08	-0.0996598	0.28	0.372	0.000514472	DS_vs_CTL	SNRNP70	2.31963e-07	FALSE	vRG	1.23339	1.15102
1.93611e-08	-0.228956	0.261	0.352	0.00051514	DS_vs_CTL	SEC24B	2.31963e-07	FALSE	vRG	1.63433	1.39437
1.93901e-08	0.133651	0.309	0.345	0.000515913	DS_vs_CTL	ZNF254	2.31963e-07	FALSE	vRG	1.48428	1.62848
1.94035e-08	-0.998241	0.07	0.149	0.000516268	DS_vs_CTL	PTH2R	2.31963e-07	TRUE	vRG	0.797519	0.398753
1.94303e-08	-0.875875	0.046	0.111	0.000516983	DS_vs_CTL	BANF1	2.31976e-07	TRUE	vRG	0.358813	0.195079
1.96266e-08	0.0880237	0.202	0.244	0.000522205	DS_vs_CTL	CEP95	2.34007e-07	FALSE	vRG	0.854876	0.908749
1.97567e-08	0.351034	0.419	0.416	0.000525666	DS_vs_CTL	GPC4	2.35246e-07	TRUE	vRG	2.53764	3.23701
1.98292e-08	-0.318745	0.094	0.158	0.000527597	DS_vs_CTL	USP11	2.35797e-07	TRUE	vRG	0.482006	0.386276
2.00306e-08	1.34137	0.112	0.063	0.000532953	DS_vs_CTL	AC013640.1	2.37876e-07	TRUE	vRG	0.221391	0.562605
2.01141e-08	0.650287	0.191	0.171	0.000535176	DS_vs_CTL	GRIA3	2.38404e-07	TRUE	vRG	0.569797	0.894902
2.01282e-08	0.369891	0.248	0.252	0.00053555	DS_vs_CTL	GABBR1	2.38404e-07	TRUE	vRG	0.896553	1.1589
2.01709e-08	-0.124956	0.059	0.1	0.000536687	DS_vs_CTL	PSMD8	2.38596e-07	FALSE	vRG	0.286072	0.262276
2.02958e-08	-0.344907	0.114	0.179	0.00054001	DS_vs_CTL	SMC1A	2.39757e-07	TRUE	vRG	0.732409	0.576474
2.03649e-08	-0.0779943	0.442	0.529	0.000541848	DS_vs_CTL	TTC17	2.40257e-07	FALSE	vRG	2.80993	2.66203
2.08418e-08	-0.0473025	0.224	0.279	0.000554537	DS_vs_CTL	RAD23B	2.45561e-07	FALSE	vRG	1.17808	1.14007
2.09293e-08	0.020544	0.3	0.362	0.000556867	DS_vs_CTL	TTLL5	2.46269e-07	FALSE	vRG	1.70037	1.7248
2.1387e-08	-0.511904	0.089	0.165	0.000569044	DS_vs_CTL	CDK5RAP3	2.51325e-07	TRUE	vRG	0.423713	0.296864
2.15456e-08	0.173631	0.307	0.338	0.000573263	DS_vs_CTL	FIGN	2.52858e-07	FALSE	vRG	1.80851	2.03997
2.16183e-08	-0.941168	0.051	0.121	0.000575198	DS_vs_CTL	MELTF-AS1	2.5338e-07	TRUE	vRG	0.343137	0.178238
2.17523e-08	-0.28883	0.151	0.226	0.000578763	DS_vs_CTL	SF3B2	2.54049e-07	TRUE	vRG	0.853153	0.698199
2.17531e-08	-0.0132668	0.396	0.476	0.000578785	DS_vs_CTL	ANKIB1	2.54049e-07	FALSE	vRG	2.45794	2.43545
2.17603e-08	1.31307	0.144	0.08	0.000578976	DS_vs_CTL	AC023509.6	2.54049e-07	TRUE	vRG	0.299501	0.745737
2.19366e-08	0.165958	0.164	0.198	0.000583668	DS_vs_CTL	CROCC	2.55775e-07	FALSE	vRG	0.705175	0.791296
2.19745e-08	-0.362103	0.587	0.713	0.000584676	DS_vs_CTL	ATRX	2.55885e-07	TRUE	vRG	5.12498	3.98718
2.25705e-08	-0.591463	0.302	0.43	0.000600534	DS_vs_CTL	ARNT2	2.62485e-07	TRUE	vRG	2.49162	1.65329
2.27697e-08	-0.480045	0.359	0.492	0.000605832	DS_vs_CTL	NSD2	2.64458e-07	TRUE	vRG	2.79658	2.00475
2.31742e-08	-0.795105	0.068	0.141	0.000616595	DS_vs_CTL	COX6B1	2.68808e-07	TRUE	vRG	0.504877	0.290547
2.33134e-08	-0.187387	0.209	0.282	0.0006203	DS_vs_CTL	KIFAP3	2.69765e-07	FALSE	vRG	1.04472	0.917364
2.33167e-08	0.20124	0.157	0.185	0.000620388	DS_vs_CTL	JADE1	2.69765e-07	FALSE	vRG	0.671941	0.772702
2.35679e-08	0.152307	0.278	0.32	0.000627071	DS_vs_CTL	RNF169	2.72035e-07	FALSE	vRG	1.4265	1.58548
2.35735e-08	0.250946	0.092	0.115	0.000627221	DS_vs_CTL	AARS	2.72035e-07	TRUE	vRG	0.376133	0.447815
2.36528e-08	-1.0509	0.058	0.133	0.000629329	DS_vs_CTL	PSMB5	2.72599e-07	TRUE	vRG	0.498231	0.239968
2.37935e-08	-0.262689	0.174	0.25	0.000633074	DS_vs_CTL	RFC1	2.73869e-07	TRUE	vRG	1.10957	0.924719
2.38291e-08	-0.70635	0.111	0.205	0.00063402	DS_vs_CTL	SNHG6	2.73927e-07	TRUE	vRG	0.585245	0.358302
2.40504e-08	0.291989	0.174	0.198	0.000639909	DS_vs_CTL	GOLGA8B	2.76065e-07	TRUE	vRG	0.576357	0.705908
2.40765e-08	0.286995	0.234	0.246	0.000640603	DS_vs_CTL	NIPSNAP2	2.76065e-07	TRUE	vRG	1.03633	1.26467
2.42216e-08	-0.175437	0.15	0.214	0.000644465	DS_vs_CTL	SNAPC3	2.77375e-07	FALSE	vRG	0.792888	0.702009
2.43748e-08	0.242513	0.5	0.518	0.000648541	DS_vs_CTL	EPC1	2.78773e-07	FALSE	vRG	2.80502	3.3187
2.45102e-08	0.243902	0.216	0.263	0.000652143	DS_vs_CTL	MAT2A	2.79965e-07	FALSE	vRG	0.69592	0.824319
2.46797e-08	-1.06156	0.044	0.108	0.000656652	DS_vs_CTL	BRK1	2.81543e-07	TRUE	vRG	0.383444	0.183198
2.50484e-08	-0.128352	0.091	0.135	0.000666462	DS_vs_CTL	KMT2B	2.85386e-07	FALSE	vRG	0.45475	0.415977
2.52159e-08	-0.297733	0.229	0.322	0.000670919	DS_vs_CTL	PLEKHG4B	2.86931e-07	TRUE	vRG	1.45486	1.1834
2.53081e-08	-0.341053	0.085	0.144	0.000673373	DS_vs_CTL	AGGF1	2.87615e-07	TRUE	vRG	0.542675	0.42823
2.54642e-08	-0.470228	0.489	0.621	0.000677525	DS_vs_CTL	STK39	2.88984e-07	TRUE	vRG	4.78704	3.45526
2.54929e-08	-0.716524	0.075	0.147	0.00067829	DS_vs_CTL	PGAM1	2.88984e-07	TRUE	vRG	0.617129	0.37518
2.56379e-08	-0.375179	0.118	0.188	0.000682148	DS_vs_CTL	MFGE8	2.90261e-07	TRUE	vRG	0.75249	0.579965
2.61e-08	-0.123061	0.158	0.217	0.000694442	DS_vs_CTL	EFHC1	2.94936e-07	FALSE	vRG	0.876257	0.804552
2.61165e-08	0.0889715	0.08	0.113	0.000694882	DS_vs_CTL	SPATA33	2.94936e-07	FALSE	vRG	0.421473	0.448375
2.61626e-08	1.0201	0.193	0.132	0.000696108	DS_vs_CTL	AC107072.2	2.95085e-07	TRUE	vRG	0.599338	1.21658
2.63937e-08	0.256641	0.917	0.915	0.000702258	DS_vs_CTL	TCF4	2.97319e-07	TRUE	vRG	11.5854	13.8413
2.65139e-08	-0.491552	0.105	0.184	0.000705456	DS_vs_CTL	SQSTM1	2.98221e-07	TRUE	vRG	0.699208	0.497044
2.65403e-08	-0.00371944	0.404	0.476	0.000706158	DS_vs_CTL	HP1BP3	2.98221e-07	FALSE	vRG	2.28149	2.27564
2.67974e-08	-0.145916	0.342	0.449	0.000712999	DS_vs_CTL	CIRBP	3.00734e-07	FALSE	vRG	1.59861	1.44476
2.71008e-08	-0.956168	0.095	0.185	0.000721072	DS_vs_CTL	TRIR	3.03759e-07	TRUE	vRG	0.736508	0.379137
2.73692e-08	-0.103469	0.193	0.257	0.000728212	DS_vs_CTL	ESF1	3.06385e-07	FALSE	vRG	1.18063	1.09887
2.7467e-08	-0.179197	0.206	0.284	0.000730814	DS_vs_CTL	SESTD1	3.07097e-07	FALSE	vRG	1.12765	0.995839
2.78391e-08	0.392181	0.122	0.137	0.000740716	DS_vs_CTL	FAM126B	3.10509e-07	TRUE	vRG	0.457531	0.600802
2.78414e-08	-0.211351	0.179	0.254	0.000740775	DS_vs_CTL	RPN2	3.10509e-07	FALSE	vRG	1.01326	0.875069
2.83387e-08	-0.0306751	0.148	0.196	0.000754009	DS_vs_CTL	PPM1B	3.14781e-07	FALSE	vRG	0.73597	0.72049
2.83393e-08	-0.300378	0.266	0.367	0.000754023	DS_vs_CTL	TCERG1	3.14781e-07	TRUE	vRG	1.60742	1.30512
2.83516e-08	-0.297175	0.105	0.177	0.000754352	DS_vs_CTL	MLLT11	3.14781e-07	TRUE	vRG	0.514123	0.418248
2.83647e-08	0.0471258	0.346	0.406	0.000754699	DS_vs_CTL	RFX2	3.14781e-07	FALSE	vRG	2.11499	2.18528
2.86335e-08	0.233365	0.252	0.276	0.000761852	DS_vs_CTL	NR2C2	3.17373e-07	FALSE	vRG	1.19193	1.4014
2.88313e-08	-0.502812	0.616	0.655	0.000767114	DS_vs_CTL	LDB2	3.1917e-07	TRUE	vRG	7.24981	5.11613
2.89244e-08	0.0386768	0.216	0.265	0.000769592	DS_vs_CTL	SNX13	3.19807e-07	FALSE	vRG	1.06353	1.09248
2.91313e-08	-0.174938	0.494	0.618	0.000775095	DS_vs_CTL	RPL10	3.21698e-07	FALSE	vRG	3.90445	3.45849
2.95204e-08	-0.329876	0.297	0.409	0.00078545	DS_vs_CTL	STK33	3.25316e-07	TRUE	vRG	2.45205	1.95068
2.95313e-08	-0.330797	0.18	0.267	0.00078574	DS_vs_CTL	HYDIN	3.25316e-07	TRUE	vRG	1.40378	1.11596
2.96035e-08	0.0782819	0.243	0.288	0.000787659	DS_vs_CTL	EP400	3.25711e-07	FALSE	vRG	1.12389	1.18664
2.96664e-08	-0.530913	0.109	0.189	0.000789334	DS_vs_CTL	EID1	3.26004e-07	TRUE	vRG	0.710793	0.491657
3.02114e-08	-0.280107	0.355	0.47	0.000803836	DS_vs_CTL	U2SURP	3.31226e-07	TRUE	vRG	2.27526	1.87359
3.02154e-08	0.65458	0.18	0.161	0.000803941	DS_vs_CTL	NDUFV3	3.31226e-07	TRUE	vRG	0.60009	0.945257
3.03809e-08	-0.155137	0.141	0.201	0.000808345	DS_vs_CTL	DNAJA1	3.32634e-07	FALSE	vRG	0.751125	0.674465
3.07086e-08	-0.0813183	0.244	0.309	0.000817064	DS_vs_CTL	PAXIP1	3.35812e-07	FALSE	vRG	1.31435	1.24229
3.08621e-08	-0.674713	0.178	0.288	0.000821147	DS_vs_CTL	JPH1	3.3681e-07	TRUE	vRG	1.59294	0.997546
3.08749e-08	1.42789	0.119	0.059	0.000821488	DS_vs_CTL	AL031428.1	3.3681e-07	TRUE	vRG	0.20238	0.546288
3.15726e-08	-0.0785249	0.114	0.165	0.000840053	DS_vs_CTL	ZNF883	3.44004e-07	FALSE	vRG	0.614492	0.58191
3.17548e-08	-0.363979	0.073	0.136	0.000844899	DS_vs_CTL	AP2M1	3.45569e-07	TRUE	vRG	0.346789	0.269255
3.22372e-08	0.304192	0.325	0.336	0.000857736	DS_vs_CTL	PTPN12	3.50395e-07	TRUE	vRG	1.40267	1.73219
3.23869e-08	0.161402	0.306	0.343	0.000861719	DS_vs_CTL	CNOT2	3.51596e-07	FALSE	vRG	1.45456	1.62689
3.25752e-08	0.835461	0.199	0.152	0.000866729	DS_vs_CTL	RRP1B	3.53213e-07	TRUE	vRG	0.547213	0.977301
3.27413e-08	-0.227583	0.095	0.152	0.000871148	DS_vs_CTL	ERH	3.54399e-07	FALSE	vRG	0.556274	0.474968
3.27867e-08	-0.0288217	0.078	0.117	0.000872356	DS_vs_CTL	MTCH1	3.54399e-07	FALSE	vRG	0.315647	0.309408
3.28031e-08	-0.607697	0.328	0.457	0.000872791	DS_vs_CTL	HSP90AB1	3.54399e-07	TRUE	vRG	2.82049	1.8506
3.35569e-08	-0.11311	0.152	0.206	0.000892848	DS_vs_CTL	NBDY	3.62108e-07	FALSE	vRG	0.773264	0.714902
3.37933e-08	0.0408148	0.102	0.138	0.000899139	DS_vs_CTL	ZNF160	3.64103e-07	FALSE	vRG	0.502927	0.517414
3.38229e-08	-0.0402158	0.154	0.219	0.000899926	DS_vs_CTL	CDC37	3.64103e-07	FALSE	vRG	0.560503	0.545092
3.39122e-08	1.09272	0.106	0.075	0.000902301	DS_vs_CTL	SRA1	3.64627e-07	TRUE	vRG	0.219244	0.468795
3.39595e-08	-0.61967	0.037	0.085	0.00090356	DS_vs_CTL	LAMTOR5	3.64699e-07	TRUE	vRG	0.292097	0.189765
3.43364e-08	0.0944892	0.17	0.206	0.00091359	DS_vs_CTL	ACO2	3.68307e-07	FALSE	vRG	0.811886	0.866936
3.46054e-08	-0.898441	0.026	0.072	0.000920746	DS_vs_CTL	VKORC1	3.70749e-07	TRUE	vRG	0.198686	0.106133
3.4805e-08	-0.0725115	0.328	0.411	0.000926057	DS_vs_CTL	DCLK2	3.72443e-07	FALSE	vRG	2.03217	1.93253
3.55815e-08	-1.9653	0.028	0.089	0.000946717	DS_vs_CTL	DNAJB1	3.80299e-07	TRUE	vRG	0.492483	0.125371
3.57787e-08	-0.480455	0.066	0.123	0.000951963	DS_vs_CTL	COX6A1	3.81951e-07	TRUE	vRG	0.399785	0.286278
3.58938e-08	-0.344321	0.107	0.175	0.000955026	DS_vs_CTL	ABCA1	3.82725e-07	TRUE	vRG	0.739714	0.582462
3.60669e-08	-0.0524699	0.245	0.311	0.000959633	DS_vs_CTL	SPATA6	3.83804e-07	FALSE	vRG	1.51935	1.46507
3.60845e-08	-0.0565354	0.193	0.249	0.000960101	DS_vs_CTL	HECTD2	3.83804e-07	FALSE	vRG	0.973704	0.93627
3.61232e-08	-0.184612	0.272	0.359	0.000961131	DS_vs_CTL	MPP5	3.83804e-07	FALSE	vRG	1.81113	1.59349
3.61763e-08	-0.155345	0.131	0.188	0.000962542	DS_vs_CTL	GTF2IRD2	3.83913e-07	FALSE	vRG	0.717675	0.644332
3.62629e-08	-0.806904	0.067	0.138	0.000964846	DS_vs_CTL	GABARAPL2	3.84378e-07	TRUE	vRG	0.471582	0.269141
3.64854e-08	-0.570374	0.112	0.197	0.000970767	DS_vs_CTL	RPL23A	3.86281e-07	TRUE	vRG	0.784633	0.528091
3.69183e-08	-0.0836258	0.37	0.451	0.000982285	DS_vs_CTL	UGGT2	3.90276e-07	FALSE	vRG	2.37089	2.23734
3.69497e-08	-0.416901	0.144	0.223	0.000983121	DS_vs_CTL	DDX18	3.90276e-07	TRUE	vRG	0.912564	0.683304
3.72336e-08	0.115001	0.15	0.186	0.000990675	DS_vs_CTL	DOCK11	3.92813e-07	FALSE	vRG	0.750992	0.813417
3.73694e-08	-0.0963004	0.385	0.471	0.000994289	DS_vs_CTL	DOCK1	3.93783e-07	FALSE	vRG	2.61852	2.4494
3.7427e-08	-0.379729	0.119	0.191	0.000995821	DS_vs_CTL	TMED10	3.93893e-07	TRUE	vRG	0.742697	0.570609
3.74888e-08	-0.0639173	0.135	0.183	0.000997465	DS_vs_CTL	ABCE1	3.93893e-07	FALSE	vRG	0.693118	0.66306
3.75116e-08	0.0484958	0.309	0.371	0.000998071	DS_vs_CTL	TRIM33	3.93893e-07	FALSE	vRG	1.62777	1.68347
3.83009e-08	-0.253103	0.209	0.29	0.00101907	DS_vs_CTL	ARMCX4	4.01712e-07	TRUE	vRG	1.27231	1.06744
3.8507e-08	0.315115	0.152	0.166	0.00102456	DS_vs_CTL	AHCTF1	4.03402e-07	TRUE	vRG	0.586393	0.729816
3.86001e-08	0.0659906	0.406	0.471	0.00102703	DS_vs_CTL	PBRM1	4.03658e-07	FALSE	vRG	2.42774	2.54144
3.86213e-08	0.620566	0.436	0.346	0.0010276	DS_vs_CTL	PCDH7	4.03658e-07	TRUE	vRG	2.38478	3.66713
3.87362e-08	-0.361177	0.056	0.102	0.00103065	DS_vs_CTL	WRNIP1	4.04388e-07	TRUE	vRG	0.325244	0.253007
3.89858e-08	-0.286287	0.168	0.248	0.0010373	DS_vs_CTL	SKP1	4.06521e-07	TRUE	vRG	0.95856	0.785867
3.93466e-08	-0.243022	0.195	0.28	0.00104689	DS_vs_CTL	UBA2	4.09807e-07	FALSE	vRG	1.24289	1.05007
3.94202e-08	-0.141232	0.595	0.711	0.00104885	DS_vs_CTL	LIPG	4.10051e-07	FALSE	vRG	5.71092	5.17828
3.94614e-08	-0.435619	0.255	0.372	0.00104995	DS_vs_CTL	RPL37	4.10051e-07	TRUE	vRG	1.57462	1.16399
3.96494e-08	-0.00665555	0.325	0.386	0.00105495	DS_vs_CTL	DDX46	4.11373e-07	FALSE	vRG	1.75995	1.75187
3.96803e-08	0.114616	0.197	0.231	0.00105577	DS_vs_CTL	MPRIP	4.11373e-07	FALSE	vRG	0.822707	0.890845
3.97666e-08	0.0913443	0.075	0.104	0.00105807	DS_vs_CTL	TACC1	4.11793e-07	FALSE	vRG	0.328364	0.34992
3.98826e-08	-0.434281	0.195	0.299	0.00106116	DS_vs_CTL	BEX3	4.12518e-07	TRUE	vRG	1.10236	0.815571
3.99349e-08	-0.753419	0.086	0.165	0.00106255	DS_vs_CTL	ANXA2	4.12584e-07	TRUE	vRG	0.696358	0.41268
3.99846e-08	0.241501	0.2	0.224	0.00106387	DS_vs_CTL	NUP93	4.12622e-07	FALSE	vRG	0.839398	0.992569
4.00837e-08	-0.0354782	0.151	0.199	0.00106651	DS_vs_CTL	ITGAV	4.1317e-07	FALSE	vRG	0.781071	0.762097
4.02878e-08	-0.813551	0.043	0.1	0.00107194	DS_vs_CTL	RBM8A	4.14798e-07	TRUE	vRG	0.307891	0.174762
4.06615e-08	1.09917	0.161	0.103	0.00108188	DS_vs_CTL	AC007262.2	4.17709e-07	TRUE	vRG	0.443458	0.951235
4.06636e-08	-0.841886	0.06	0.128	0.00108194	DS_vs_CTL	ELMO2	4.17709e-07	TRUE	vRG	0.472986	0.263452
4.08681e-08	-0.773539	0.045	0.1	0.00108738	DS_vs_CTL	ZNF22	4.18975e-07	TRUE	vRG	0.314577	0.183616
4.08801e-08	-0.548448	0.324	0.452	0.0010877	DS_vs_CTL	SGK3	4.18975e-07	TRUE	vRG	2.69405	1.84177
4.11824e-08	-0.27652	0.122	0.189	0.00109574	DS_vs_CTL	DCTN2	4.21451e-07	TRUE	vRG	0.657085	0.542321
4.12246e-08	0.11182	0.243	0.287	0.00109686	DS_vs_CTL	FAR1	4.21451e-07	FALSE	vRG	1.13006	1.22124
4.12625e-08	0.136415	0.24	0.281	0.00109787	DS_vs_CTL	MAPRE2	4.21451e-07	FALSE	vRG	1.15985	1.275
4.14813e-08	-0.460302	0.097	0.166	0.00110369	DS_vs_CTL	TUG1	4.22313e-07	TRUE	vRG	0.566312	0.411356
4.14929e-08	1.07652	0.201	0.128	0.001104	DS_vs_CTL	CCN2	4.22313e-07	TRUE	vRG	0.841048	1.7749
4.1538e-08	0.311949	0.171	0.191	0.0011052	DS_vs_CTL	ADAR	4.22313e-07	TRUE	vRG	0.675135	0.838377
4.15542e-08	0.269944	0.546	0.552	0.00110563	DS_vs_CTL	CASC4	4.22313e-07	TRUE	vRG	3.37215	4.06624
4.1629e-08	-0.101108	0.394	0.487	0.00110762	DS_vs_CTL	RBM25	4.22313e-07	FALSE	vRG	2.3756	2.21477
4.16292e-08	0.6582	0.161	0.142	0.00110763	DS_vs_CTL	ADAM33	4.22313e-07	TRUE	vRG	0.574552	0.907332
4.17463e-08	0.0814548	0.137	0.169	0.00111074	DS_vs_CTL	ARNT	4.23023e-07	FALSE	vRG	0.672587	0.711739
4.22041e-08	-0.668505	0.06	0.122	0.00112292	DS_vs_CTL	SEC61B	4.2718e-07	TRUE	vRG	0.441968	0.277709
4.23506e-08	-1.06236	0.024	0.073	0.00112682	DS_vs_CTL	RTL8A	4.28179e-07	TRUE	vRG	0.198573	0.0945711
4.28394e-08	-0.2636	0.088	0.148	0.00113983	DS_vs_CTL	GABRA2	4.32635e-07	TRUE	vRG	0.596193	0.496485
4.30573e-08	1.06429	0.188	0.141	0.00114563	DS_vs_CTL	LINC00609	4.34347e-07	TRUE	vRG	0.840444	1.75864
4.32242e-08	0.0396324	0.198	0.244	0.00115007	DS_vs_CTL	DNAJC7	4.35541e-07	FALSE	vRG	1.01494	1.04326
4.33328e-08	0.154402	0.17	0.205	0.00115296	DS_vs_CTL	PTPRF	4.36146e-07	FALSE	vRG	0.743278	0.827381
4.3678e-08	0.199963	0.243	0.27	0.00116214	DS_vs_CTL	SIK2	4.39128e-07	FALSE	vRG	1.22748	1.41015
4.38491e-08	0.302718	0.552	0.538	0.00116669	DS_vs_CTL	MYO10	4.40355e-07	TRUE	vRG	3.60252	4.44385
4.4031e-08	-0.581749	0.108	0.188	0.00117153	DS_vs_CTL	PRDM16-DT	4.41687e-07	TRUE	vRG	0.752989	0.502793
4.41034e-08	0.250055	0.254	0.273	0.00117346	DS_vs_CTL	TJP1	4.4192e-07	TRUE	vRG	1.19984	1.42714
4.43815e-08	-0.389444	0.301	0.422	0.00118086	DS_vs_CTL	RPL19	4.44211e-07	TRUE	vRG	2.03911	1.55649
4.45808e-08	-0.315037	0.111	0.176	0.00118616	DS_vs_CTL	ODC1	4.45709e-07	TRUE	vRG	0.671564	0.539645
4.46729e-08	-1.61716	0.023	0.079	0.00118861	DS_vs_CTL	GGH	4.46133e-07	TRUE	vRG	0.290268	0.0939467
4.49968e-08	-0.491471	0.112	0.187	0.00119723	DS_vs_CTL	RAD21	4.4841e-07	TRUE	vRG	0.671845	0.477609
4.50008e-08	-0.236924	0.131	0.195	0.00119734	DS_vs_CTL	TSPAN7	4.4841e-07	FALSE	vRG	0.766852	0.650583
4.51057e-08	-0.10621	0.082	0.129	0.00120013	DS_vs_CTL	CNOT7	4.48648e-07	FALSE	vRG	0.433643	0.402817
4.51246e-08	2.21853	0.116	0.07	0.00120063	DS_vs_CTL	NTRK2	4.48648e-07	TRUE	vRG	0.168519	0.788136
4.51815e-08	-0.0968309	0.293	0.374	0.00120215	DS_vs_CTL	LINC01578	4.48717e-07	FALSE	vRG	1.55292	1.45207
4.55094e-08	0.220148	0.4	0.424	0.00121087	DS_vs_CTL	CNTN3	4.51473e-07	FALSE	vRG	2.43793	2.84003
4.55821e-08	-0.934698	0.023	0.067	0.0012128	DS_vs_CTL	CD59	4.51628e-07	TRUE	vRG	0.207513	0.108091
4.56256e-08	0.0615857	0.275	0.326	0.00121396	DS_vs_CTL	PRPF4B	4.51628e-07	FALSE	vRG	1.49522	1.5605
4.5888e-08	0.180303	0.166	0.191	0.00122094	DS_vs_CTL	RARS2	4.53725e-07	FALSE	vRG	0.733282	0.831061
4.60479e-08	-0.212549	0.169	0.238	0.0012252	DS_vs_CTL	USP8	4.54805e-07	FALSE	vRG	0.984044	0.849124
4.61724e-08	-0.881555	0.065	0.136	0.00122851	DS_vs_CTL	NGRN	4.55534e-07	TRUE	vRG	0.519728	0.28165
4.65887e-08	-0.663839	0.189	0.302	0.00123958	DS_vs_CTL	RPL39	4.59136e-07	TRUE	vRG	1.29265	0.815558
4.66725e-08	-0.150672	0.091	0.141	0.00124181	DS_vs_CTL	AC093157.1	4.59458e-07	FALSE	vRG	0.556581	0.501308
4.67475e-08	-0.235202	0.24	0.325	0.00124381	DS_vs_CTL	IGSF11	4.59692e-07	FALSE	vRG	1.64797	1.39992
4.74428e-08	-0.352587	0.038	0.08	0.00126231	DS_vs_CTL	C16orf87	4.66019e-07	TRUE	vRG	0.255609	0.199988
4.85315e-08	-0.110727	0.448	0.548	0.00129128	DS_vs_CTL	ANKRD11	4.76192e-07	FALSE	vRG	2.95748	2.73893
4.87189e-08	-0.471143	0.07	0.133	0.00129626	DS_vs_CTL	ATP5F1B	4.77509e-07	TRUE	vRG	0.43424	0.312994
4.89717e-08	-0.0247085	0.071	0.104	0.00130299	DS_vs_CTL	ECI1	4.79464e-07	FALSE	vRG	0.358394	0.352316
4.93821e-08	-0.662636	0.114	0.202	0.00131391	DS_vs_CTL	DNAI1	4.82955e-07	TRUE	vRG	1.03298	0.652198
4.95663e-08	-0.157894	0.089	0.134	0.00131881	DS_vs_CTL	CSPG5	4.84228e-07	FALSE	vRG	0.451567	0.404672
4.97285e-08	-0.163911	0.268	0.351	0.00132313	DS_vs_CTL	ZFYVE16	4.85285e-07	FALSE	vRG	1.55537	1.38824
5.01368e-08	-0.232581	0.123	0.187	0.00133399	DS_vs_CTL	NISCH	4.88739e-07	FALSE	vRG	0.611159	0.520035
5.02664e-08	-0.627995	0.143	0.241	0.00133744	DS_vs_CTL	HINT1	4.89471e-07	TRUE	vRG	0.895548	0.579146
5.14601e-08	0.28502	0.291	0.309	0.0013692	DS_vs_CTL	TTC7B	5.00551e-07	TRUE	vRG	1.42142	1.73214
5.18538e-08	0.921162	0.097	0.084	0.00137967	DS_vs_CTL	CALCOCO1	5.03834e-07	TRUE	vRG	0.221912	0.421173
5.27751e-08	0.0803351	0.397	0.446	0.00140419	DS_vs_CTL	BBX	5.12232e-07	FALSE	vRG	2.37163	2.50752
5.29315e-08	0.659464	0.168	0.147	0.00140835	DS_vs_CTL	DAP3	5.13195e-07	TRUE	vRG	0.548786	0.867431
5.30352e-08	0.270505	0.129	0.151	0.00141111	DS_vs_CTL	ATG5	5.13646e-07	TRUE	vRG	0.521952	0.629833
5.33841e-08	0.399637	0.447	0.42	0.00142039	DS_vs_CTL	DIXDC1	5.16468e-07	TRUE	vRG	2.31904	3.05958
5.38033e-08	-0.0101301	0.171	0.221	0.00143154	DS_vs_CTL	OAT	5.19964e-07	FALSE	vRG	0.968276	0.961519
5.43888e-08	-0.237913	0.084	0.136	0.00144712	DS_vs_CTL	NDUFS2	5.25057e-07	FALSE	vRG	0.390501	0.331001
5.45884e-08	-0.0481615	0.175	0.228	0.00145243	DS_vs_CTL	ADAM9	5.26417e-07	FALSE	vRG	0.944775	0.913747
5.47816e-08	-0.586859	0.326	0.453	0.00145757	DS_vs_CTL	SGCD	5.27714e-07	TRUE	vRG	4.02867	2.68193
5.51837e-08	-0.32295	0.218	0.315	0.00146827	DS_vs_CTL	CORO2B	5.31018e-07	TRUE	vRG	1.35746	1.08502
5.55803e-08	-0.480645	0.146	0.238	0.00147883	DS_vs_CTL	FTL	5.34259e-07	TRUE	vRG	0.837744	0.600107
5.56396e-08	0.0740483	0.36	0.42	0.0014804	DS_vs_CTL	MPDZ	5.34259e-07	FALSE	vRG	2.05477	2.16307
5.57553e-08	0.266043	0.309	0.327	0.00148348	DS_vs_CTL	PRKRIP1	5.34798e-07	TRUE	vRG	1.39981	1.68351
5.62151e-08	-0.453604	0.078	0.138	0.00149572	DS_vs_CTL	PSMD4	5.38633e-07	TRUE	vRG	0.522441	0.38124
5.63801e-08	0.301174	0.166	0.184	0.00150011	DS_vs_CTL	GGA1	5.39638e-07	TRUE	vRG	0.653564	0.805553
5.68974e-08	-0.290144	0.049	0.093	0.00151387	DS_vs_CTL	SLBP	5.44009e-07	TRUE	vRG	0.287665	0.235095
5.69751e-08	-0.0754939	0.142	0.189	0.00151594	DS_vs_CTL	EDRF1	5.44172e-07	FALSE	vRG	0.730645	0.693367
5.73816e-08	-0.257767	0.326	0.433	0.00152675	DS_vs_CTL	ABAT	5.47473e-07	TRUE	vRG	2.42444	2.02761
5.77337e-08	-0.00889321	0.319	0.38	0.00153612	DS_vs_CTL	THOC2	5.50248e-07	FALSE	vRG	1.7115	1.701
5.87791e-08	-0.0862942	0.192	0.251	0.00156393	DS_vs_CTL	AL391807.1	5.59617e-07	FALSE	vRG	0.925477	0.871708
5.90694e-08	-0.00403226	0.232	0.296	0.00157166	DS_vs_CTL	EIF4A1	5.61785e-07	FALSE	vRG	1.08939	1.08637
5.92933e-08	-0.328204	0.054	0.101	0.00157762	DS_vs_CTL	ARHGEF17	5.63318e-07	TRUE	vRG	0.307182	0.244493
5.96297e-08	-0.380347	0.127	0.199	0.00158657	DS_vs_CTL	BRD7	5.65915e-07	TRUE	vRG	0.757374	0.581639
5.98303e-08	0.0139061	0.063	0.093	0.00159191	DS_vs_CTL	PDCD10	5.67219e-07	FALSE	vRG	0.290645	0.293495
5.99714e-08	-0.289805	0.222	0.313	0.00159566	DS_vs_CTL	YBX1	5.67957e-07	TRUE	vRG	1.27771	1.04502
6.01044e-08	-0.804376	0.029	0.077	0.0015992	DS_vs_CTL	NDUFA3	5.68617e-07	TRUE	vRG	0.205208	0.117086
6.03761e-08	-0.385328	0.193	0.282	0.00160643	DS_vs_CTL	SH3BGRL	5.70586e-07	TRUE	vRG	1.31263	1.00474
6.07778e-08	0.289485	0.232	0.245	0.00161711	DS_vs_CTL	TTC28-AS1	5.73668e-07	TRUE	vRG	1.03858	1.26961
6.08588e-08	-0.648197	0.091	0.168	0.00161927	DS_vs_CTL	SRP9	5.73668e-07	TRUE	vRG	0.627894	0.400295
6.08939e-08	-0.584895	0.185	0.295	0.0016202	DS_vs_CTL	SET	5.73668e-07	TRUE	vRG	1.19113	0.793805
6.15113e-08	0.288447	0.252	0.27	0.00163663	DS_vs_CTL	CRB1	5.78877e-07	TRUE	vRG	1.25325	1.53088
6.17111e-08	-0.0551657	0.218	0.274	0.00164195	DS_vs_CTL	SETX	5.80149e-07	FALSE	vRG	1.1423	1.09944
6.20446e-08	0.0148669	0.123	0.167	0.00165082	DS_vs_CTL	RBMS2	5.82674e-07	FALSE	vRG	0.691406	0.698604
6.26938e-08	-0.14031	0.617	0.732	0.00166809	DS_vs_CTL	GPM6B	5.88156e-07	FALSE	vRG	6.44126	5.84424
6.27754e-08	-0.032739	0.126	0.172	0.00167027	DS_vs_CTL	SSB	5.88306e-07	FALSE	vRG	0.659502	0.644707
6.28743e-08	0.191017	0.149	0.177	0.0016729	DS_vs_CTL	DCP2	5.88619e-07	FALSE	vRG	0.666817	0.761389
6.34282e-08	0.290982	0.826	0.833	0.00168764	DS_vs_CTL	MID1	5.93186e-07	TRUE	vRG	11.2878	13.8106
6.35135e-08	-0.628839	0.025	0.063	0.0016899	DS_vs_CTL	AEBP1	5.93366e-07	TRUE	vRG	0.185287	0.119483
6.36022e-08	0.923913	0.149	0.114	0.00169226	DS_vs_CTL	CEMIP2	5.93576e-07	TRUE	vRG	0.446576	0.848225
6.41432e-08	-0.0146459	0.176	0.222	0.00170666	DS_vs_CTL	DARS	5.98004e-07	FALSE	vRG	0.909031	0.899864
6.48895e-08	0.123552	0.122	0.15	0.00172651	DS_vs_CTL	DGCR8	6.04334e-07	FALSE	vRG	0.501019	0.545935
6.53448e-08	-0.577462	0.051	0.103	0.00173863	DS_vs_CTL	HSD17B7	6.07944e-07	TRUE	vRG	0.325149	0.217579
6.59386e-08	-0.300923	0.082	0.134	0.00175443	DS_vs_CTL	ANKRD52	6.12548e-07	TRUE	vRG	0.468044	0.379757
6.59762e-08	-0.553613	0.089	0.162	0.00175543	DS_vs_CTL	CNBP	6.12548e-07	TRUE	vRG	0.586031	0.398964
6.71531e-08	0.792393	0.172	0.087	0.00178674	DS_vs_CTL	MYT1L	6.22831e-07	TRUE	vRG	0.36547	0.633759
6.78848e-08	-0.195303	0.171	0.237	0.00180621	DS_vs_CTL	LYRM4	6.28968e-07	FALSE	vRG	1.10051	0.961065
6.79853e-08	0.333146	0.075	0.093	0.00180888	DS_vs_CTL	PDPK1	6.29249e-07	TRUE	vRG	0.286232	0.360878
6.86977e-08	-0.0631748	0.321	0.396	0.00182784	DS_vs_CTL	LUC7L2	6.34992e-07	FALSE	vRG	1.83777	1.75902
6.87472e-08	0.0826724	0.158	0.199	0.00182916	DS_vs_CTL	MLC1	6.34992e-07	FALSE	vRG	0.773014	0.818691
6.93015e-08	0.221309	0.23	0.254	0.0018439	DS_vs_CTL	ANKRD10	6.39454e-07	FALSE	vRG	0.793254	0.924965
6.98323e-08	-1.2135	0.048	0.117	0.00185803	DS_vs_CTL	NORAD	6.4369e-07	TRUE	vRG	0.420716	0.180856
7.04009e-08	0.0827591	0.261	0.305	0.00187316	DS_vs_CTL	ANKRD28	6.48266e-07	FALSE	vRG	1.21726	1.28921
7.08828e-08	-0.0814313	0.249	0.316	0.00188598	DS_vs_CTL	RAB2A	6.52035e-07	FALSE	vRG	1.41275	1.33519
7.12273e-08	0.711066	0.507	0.426	0.00189514	DS_vs_CTL	PTPRD	6.54533e-07	TRUE	vRG	2.79277	4.57249
7.13807e-08	0.0576511	0.347	0.393	0.00189923	DS_vs_CTL	WDR70	6.54602e-07	FALSE	vRG	1.92384	2.00234
7.14012e-08	-0.0545334	0.224	0.286	0.00189977	DS_vs_CTL	PMS1	6.54602e-07	FALSE	vRG	1.23274	1.187
7.14535e-08	0.119976	0.331	0.373	0.00190116	DS_vs_CTL	ZNF518A	6.54602e-07	FALSE	vRG	1.68428	1.83045
7.16036e-08	-0.353084	0.14	0.21	0.00190516	DS_vs_CTL	KIAA0355	6.55308e-07	TRUE	vRG	0.844962	0.661329
7.17642e-08	0.0909511	0.529	0.592	0.00190943	DS_vs_CTL	AFDN	6.56109e-07	FALSE	vRG	2.86955	3.05637
7.19611e-08	0.253386	0.253	0.272	0.00191467	DS_vs_CTL	OSBPL1A	6.5724e-07	TRUE	vRG	1.26084	1.50315
7.3102e-08	0.0623477	0.293	0.346	0.00194503	DS_vs_CTL	NEMF	6.66982e-07	FALSE	vRG	1.51557	1.58258
7.35918e-08	0.144163	0.156	0.187	0.00195806	DS_vs_CTL	ZC3H7B	6.70768e-07	FALSE	vRG	0.691543	0.764351
7.37917e-08	-0.191875	0.101	0.149	0.00196338	DS_vs_CTL	SALL3	6.71908e-07	FALSE	vRG	0.537615	0.47056
7.40871e-08	0.073253	0.14	0.175	0.00197123	DS_vs_CTL	PPP2R2D	6.73541e-07	FALSE	vRG	0.617669	0.649921
7.4121e-08	-0.266949	0.338	0.447	0.00197214	DS_vs_CTL	NDFIP1	6.73541e-07	TRUE	vRG	2.21785	1.84305
7.47492e-08	0.653155	0.134	0.118	0.00198885	DS_vs_CTL	LINC01896	6.78355e-07	TRUE	vRG	0.411551	0.647827
7.486e-08	0.439323	0.084	0.094	0.0019918	DS_vs_CTL	ACOX3	6.78355e-07	TRUE	vRG	0.304124	0.412777
7.48775e-08	-0.104409	0.089	0.133	0.00199226	DS_vs_CTL	STK25	6.78355e-07	FALSE	vRG	0.376464	0.350134
7.58871e-08	0.18783	0.117	0.142	0.00201913	DS_vs_CTL	HBP1	6.86809e-07	FALSE	vRG	0.484949	0.55255
7.6105e-08	-0.480131	0.022	0.058	0.00202493	DS_vs_CTL	MRPL41	6.88088e-07	TRUE	vRG	0.148964	0.106525
7.68816e-08	-0.307119	0.443	0.565	0.00204559	DS_vs_CTL	SPATA13	6.9441e-07	TRUE	vRG	3.91143	3.16126
7.6963e-08	0.187184	0.101	0.132	0.00204775	DS_vs_CTL	ZNF655	6.94446e-07	FALSE	vRG	0.385761	0.439373
7.73493e-08	-1.36993	0.133	0.199	0.00205803	DS_vs_CTL	NRXN3	6.96643e-07	TRUE	vRG	1.97892	0.765052
7.73617e-08	-0.387727	0.137	0.214	0.00205836	DS_vs_CTL	DENND6B	6.96643e-07	TRUE	vRG	0.817441	0.624578
7.77008e-08	0.14903	0.231	0.27	0.00206739	DS_vs_CTL	NAA35	6.98996e-07	FALSE	vRG	1.12241	1.2447
7.83356e-08	0.0924193	0.184	0.222	0.00208428	DS_vs_CTL	TANK	7.04001e-07	FALSE	vRG	0.89985	0.959475
7.864e-08	-0.151874	0.131	0.185	0.00209238	DS_vs_CTL	EPRS	7.0603e-07	FALSE	vRG	0.696595	0.626914
7.94842e-08	0.0822778	0.146	0.185	0.00211483	DS_vs_CTL	TERF1	7.11791e-07	FALSE	vRG	0.681783	0.721881
7.94954e-08	0.121606	0.135	0.165	0.00211513	DS_vs_CTL	MTMR4	7.11791e-07	FALSE	vRG	0.564841	0.614633
7.95195e-08	0.045804	0.388	0.443	0.00211578	DS_vs_CTL	EPN2	7.11791e-07	FALSE	vRG	2.24026	2.31259
8.05335e-08	0.484743	0.266	0.241	0.00214276	DS_vs_CTL	UBE2G2	7.20149e-07	TRUE	vRG	0.909683	1.27339
8.06394e-08	-0.0463878	0.123	0.17	0.00214557	DS_vs_CTL	PARP6	7.20379e-07	FALSE	vRG	0.589262	0.570609
8.08098e-08	0.0725709	0.205	0.243	0.00215011	DS_vs_CTL	MGRN1	7.2115e-07	FALSE	vRG	0.956232	1.00564
8.08864e-08	-0.583165	0.123	0.209	0.00215214	DS_vs_CTL	GRK4	7.2115e-07	TRUE	vRG	0.891723	0.594903
8.1001e-08	-0.084685	0.159	0.214	0.00215519	DS_vs_CTL	NT5C3A	7.21456e-07	FALSE	vRG	0.844246	0.796082
8.13897e-08	-0.499033	0.11	0.185	0.00216553	DS_vs_CTL	WDR48	7.24199e-07	TRUE	vRG	0.662912	0.468786
8.18021e-08	0.324907	0.428	0.43	0.00217651	DS_vs_CTL	TAOK3	7.27148e-07	TRUE	vRG	2.45969	3.08125
8.20249e-08	0.15307	0.307	0.334	0.00218244	DS_vs_CTL	PIP5K1A	7.28407e-07	FALSE	vRG	1.50825	1.67721
8.37773e-08	0.538965	0.173	0.169	0.00222906	DS_vs_CTL	INPP4B	7.43234e-07	TRUE	vRG	0.752409	1.09369
8.41883e-08	-0.503743	0.038	0.081	0.00224	DS_vs_CTL	PDIA4	7.46143e-07	TRUE	vRG	0.253693	0.178643
8.45976e-08	0.0486322	0.273	0.325	0.00225089	DS_vs_CTL	FERMT2	7.48442e-07	FALSE	vRG	1.41232	1.4608
8.46145e-08	-0.159014	0.388	0.479	0.00225134	DS_vs_CTL	MEGF10	7.48442e-07	FALSE	vRG	2.90253	2.59953
8.51205e-08	-0.188603	0.103	0.156	0.0022648	DS_vs_CTL	MRPS16	7.50529e-07	FALSE	vRG	0.579984	0.508808
8.51527e-08	0.234723	0.19	0.217	0.00226566	DS_vs_CTL	GGT7	7.50529e-07	FALSE	vRG	0.805757	0.948327
8.51835e-08	-0.436129	0.203	0.304	0.00226648	DS_vs_CTL	ADAM23	7.50529e-07	TRUE	vRG	1.38014	1.01984
8.51848e-08	1.9474	0.076	0.022	0.00226651	DS_vs_CTL	PPFIA2-AS1	7.50529e-07	TRUE	vRG	0.0910073	0.353985
8.52889e-08	-0.31585	0.074	0.123	0.00226928	DS_vs_CTL	COPB2	7.5071e-07	TRUE	vRG	0.454159	0.364683
8.53748e-08	-0.125326	0.117	0.168	0.00227157	DS_vs_CTL	ERP44	7.50729e-07	FALSE	vRG	0.593951	0.544472
8.59617e-08	-0.540424	0.035	0.078	0.00228718	DS_vs_CTL	DNAJB11	7.55123e-07	TRUE	vRG	0.25863	0.177527
8.60427e-08	0.0581351	0.132	0.168	0.00228934	DS_vs_CTL	SRP72	7.55123e-07	FALSE	vRG	0.602442	0.627282
8.62979e-08	0.0345266	0.128	0.167	0.00229613	DS_vs_CTL	BANP	7.56624e-07	FALSE	vRG	0.582125	0.596274
8.74101e-08	-0.361798	0.178	0.263	0.00232572	DS_vs_CTL	CKMT2-AS1	7.65627e-07	TRUE	vRG	1.18731	0.923749
8.79019e-08	0.207134	0.322	0.343	0.00233881	DS_vs_CTL	USP15	7.69184e-07	FALSE	vRG	1.54283	1.78121
8.9925e-08	0.0488826	0.15	0.202	0.00239264	DS_vs_CTL	SAT1	7.86122e-07	FALSE	vRG	0.928457	0.960516
9.00828e-08	-0.0430872	0.352	0.429	0.00239683	DS_vs_CTL	UPF3A	7.86735e-07	FALSE	vRG	2.07282	2.01183
9.02388e-08	0.104121	0.142	0.177	0.00240098	DS_vs_CTL	TMX3	7.87332e-07	FALSE	vRG	0.629436	0.676645
9.08195e-08	-0.528641	0.195	0.3	0.00241643	DS_vs_CTL	RPL21	7.91628e-07	TRUE	vRG	1.19114	0.825412
9.13093e-08	0.00360848	0.088	0.128	0.00242947	DS_vs_CTL	TP53	7.94414e-07	FALSE	vRG	0.44905	0.450202
9.1316e-08	-0.464864	0.115	0.187	0.00242964	DS_vs_CTL	GPT2	7.94414e-07	TRUE	vRG	0.685545	0.496444
9.19451e-08	-0.0111754	0.234	0.287	0.00244638	DS_vs_CTL	ARMC8	7.99112e-07	FALSE	vRG	1.23533	1.22582
9.32951e-08	-0.00320427	0.463	0.535	0.0024823	DS_vs_CTL	NAPEPLD	8.09628e-07	FALSE	vRG	3.11702	3.11013
9.33354e-08	-0.370014	0.126	0.195	0.00248338	DS_vs_CTL	LNPEP	8.09628e-07	TRUE	vRG	0.776856	0.600902
9.38216e-08	-1.32821	0.011	0.051	0.00249631	DS_vs_CTL	RANBP6	8.1306e-07	TRUE	vRG	0.125538	0.0493981
9.44008e-08	-0.0825604	0.261	0.327	0.00251172	DS_vs_CTL	THRAP3	8.1729e-07	FALSE	vRG	1.39502	1.31739
9.56324e-08	0.828812	0.149	0.11	0.00254449	DS_vs_CTL	PDXK	8.27156e-07	TRUE	vRG	0.397025	0.706036
9.65541e-08	0.127535	0.157	0.199	0.00256902	DS_vs_CTL	CLIC4	8.33944e-07	FALSE	vRG	0.842223	0.920187
9.6794e-08	0.0948974	0.499	0.545	0.0025754	DS_vs_CTL	SENP6	8.33944e-07	FALSE	vRG	3.11033	3.3219
9.68219e-08	-0.0328505	0.203	0.267	0.00257614	DS_vs_CTL	MFHAS1	8.33944e-07	FALSE	vRG	1.20512	1.17799
9.68455e-08	-0.85834	0.077	0.156	0.00257677	DS_vs_CTL	C4orf48	8.33944e-07	TRUE	vRG	0.59177	0.325973
9.68817e-08	-0.418179	0.198	0.295	0.00257773	DS_vs_CTL	USP22	8.33944e-07	TRUE	vRG	1.26455	0.946112
9.73598e-08	0.0842343	0.077	0.109	0.00259045	DS_vs_CTL	AKIRIN2	8.37257e-07	FALSE	vRG	0.337355	0.357727
9.79209e-08	0.0443471	0.168	0.21	0.00260538	DS_vs_CTL	PTCD3	8.41276e-07	FALSE	vRG	0.754692	0.778309
9.93918e-08	0.388322	0.384	0.404	0.00264452	DS_vs_CTL	DDX5	8.53097e-07	TRUE	vRG	1.25369	1.64126
1.00326e-07	-0.242531	0.374	0.485	0.00266938	DS_vs_CTL	ANKRD36	8.60296e-07	FALSE	vRG	2.48675	2.10181
1.00987e-07	-0.378503	0.061	0.109	0.00268697	DS_vs_CTL	ANXA7	8.65138e-07	TRUE	vRG	0.392399	0.301633
1.01286e-07	-0.44401	0.169	0.259	0.00269492	DS_vs_CTL	HELLS	8.6659e-07	TRUE	vRG	1.28514	0.944441
1.0135e-07	-0.113022	0.198	0.263	0.00269662	DS_vs_CTL	ZNF654	8.6659e-07	FALSE	vRG	1.1317	1.04637
1.02444e-07	-0.160441	0.059	0.101	0.00272573	DS_vs_CTL	PGP	8.75114e-07	FALSE	vRG	0.317597	0.284086
1.03608e-07	0.208366	0.192	0.215	0.00275669	DS_vs_CTL	CLEC16A	8.84209e-07	FALSE	vRG	0.841698	0.972666
1.03966e-07	-0.157437	0.188	0.254	0.00276622	DS_vs_CTL	ACER3	8.86425e-07	FALSE	vRG	1.15999	1.03999
1.04583e-07	-0.281275	0.637	0.752	0.00278263	DS_vs_CTL	HMGB1	8.90839e-07	TRUE	vRG	5.58581	4.5962
1.0474e-07	0.0444805	0.074	0.105	0.00278681	DS_vs_CTL	PSMD3	8.91331e-07	FALSE	vRG	0.340325	0.351039
1.05238e-07	-0.35739	0.188	0.276	0.00280006	DS_vs_CTL	SACM1L	8.94719e-07	TRUE	vRG	1.16564	0.909668
1.06584e-07	-0.204919	0.158	0.219	0.00283588	DS_vs_CTL	TUBGCP2	9.05309e-07	FALSE	vRG	0.849108	0.736563
1.07093e-07	-0.0968386	0.109	0.155	0.00284943	DS_vs_CTL	NUP205	9.08774e-07	FALSE	vRG	0.567149	0.530287
1.07814e-07	-0.165641	0.111	0.165	0.00286862	DS_vs_CTL	HSPA4	9.14029e-07	FALSE	vRG	0.613452	0.546825
1.08437e-07	0.106651	0.059	0.087	0.00288518	DS_vs_CTL	ZNF219	9.18068e-07	FALSE	vRG	0.253002	0.272519
1.08541e-07	0.324259	0.388	0.381	0.00288795	DS_vs_CTL	PAX6	9.18068e-07	TRUE	vRG	2.02819	2.53962
1.08597e-07	-0.0591639	0.316	0.391	0.00288945	DS_vs_CTL	RB1CC1	9.18068e-07	FALSE	vRG	1.73663	1.66684
1.08741e-07	-0.104305	0.052	0.085	0.00289327	DS_vs_CTL	TXNDC15	9.18415e-07	FALSE	vRG	0.259835	0.241665
1.09296e-07	0.043023	0.2	0.249	0.00290805	DS_vs_CTL	SNX4	9.2224e-07	FALSE	vRG	1.0174	1.04825
1.09576e-07	0.0483701	0.11	0.15	0.0029155	DS_vs_CTL	GOSR2	9.23733e-07	FALSE	vRG	0.517463	0.535167
1.09748e-07	-0.40918	0.191	0.289	0.00292006	DS_vs_CTL	HSPA8	9.24313e-07	TRUE	vRG	1.08345	0.81566
1.09911e-07	-0.0187343	0.086	0.122	0.00292439	DS_vs_CTL	GUSB	9.24816e-07	FALSE	vRG	0.406285	0.401055
1.10961e-07	-0.160056	0.311	0.402	0.00295235	DS_vs_CTL	NRDC	9.32782e-07	FALSE	vRG	1.82177	1.63038
1.11408e-07	-0.283327	0.386	0.502	0.00296424	DS_vs_CTL	TNKS	9.35663e-07	TRUE	vRG	2.65649	2.18266
1.12197e-07	-1.099	0.116	0.21	0.00298522	DS_vs_CTL	EPHA4	9.41393e-07	TRUE	vRG	1.19849	0.558973
1.123e-07	-0.0692854	0.486	0.574	0.00298797	DS_vs_CTL	MKLN1	9.41393e-07	FALSE	vRG	3.30554	3.15052
1.12758e-07	-0.0864059	0.355	0.434	0.00300015	DS_vs_CTL	TCF7L2	9.44347e-07	FALSE	vRG	2.3983	2.25884
1.13198e-07	-0.43643	0.114	0.187	0.00301185	DS_vs_CTL	GLYATL2	9.47148e-07	TRUE	vRG	0.823756	0.608478
1.13406e-07	-0.182098	0.237	0.317	0.0030174	DS_vs_CTL	MPHOSPH8	9.48009e-07	FALSE	vRG	1.34934	1.18924
1.15096e-07	0.0402658	0.092	0.129	0.00306235	DS_vs_CTL	LSM8	9.61235e-07	FALSE	vRG	0.410925	0.42261
1.15713e-07	-0.093189	0.127	0.175	0.00307878	DS_vs_CTL	NBPF12	9.65496e-07	FALSE	vRG	0.632599	0.592989
1.16207e-07	0.375312	0.18	0.186	0.00309193	DS_vs_CTL	LUZP1	9.68718e-07	TRUE	vRG	0.82175	1.06624
1.1638e-07	-0.150574	0.133	0.187	0.00309653	DS_vs_CTL	XPA	9.69259e-07	FALSE	vRG	0.700746	0.631219
1.16584e-07	-0.585586	0.213	0.321	0.00310195	DS_vs_CTL	PKM	9.69413e-07	TRUE	vRG	1.57681	1.05043
1.16652e-07	-0.808563	0.08	0.158	0.00310377	DS_vs_CTL	PAIP1	9.69413e-07	TRUE	vRG	0.643318	0.366883
1.16723e-07	0.128567	0.294	0.336	0.00310564	DS_vs_CTL	SLC4A7	9.69413e-07	FALSE	vRG	1.45281	1.58835
1.1721e-07	0.185906	0.205	0.229	0.0031186	DS_vs_CTL	TAF2	9.72561e-07	FALSE	vRG	0.996548	1.13377
1.17485e-07	0.102788	0.377	0.433	0.00312593	DS_vs_CTL	KDM5B	9.73946e-07	FALSE	vRG	2.15114	2.3101
1.1805e-07	0.494715	0.118	0.118	0.00314096	DS_vs_CTL	GTPBP10	9.77724e-07	TRUE	vRG	0.408734	0.576374
1.18775e-07	0.0376665	0.291	0.349	0.00316024	DS_vs_CTL	TUSC3	9.82702e-07	FALSE	vRG	1.47727	1.5164
1.1887e-07	0.231361	0.25	0.267	0.00316277	DS_vs_CTL	MTX2	9.82702e-07	FALSE	vRG	1.07364	1.2606
1.19982e-07	-0.225928	0.328	0.425	0.00319237	DS_vs_CTL	HERC2	9.90984e-07	FALSE	vRG	2.08271	1.78069
1.20125e-07	-0.259241	0.153	0.223	0.00319617	DS_vs_CTL	IARS	9.91253e-07	TRUE	vRG	0.916102	0.765283
1.21045e-07	-0.304904	0.095	0.151	0.00322065	DS_vs_CTL	PEX3	9.97928e-07	TRUE	vRG	0.57344	0.464025
1.21242e-07	-0.418095	0.094	0.158	0.0032259	DS_vs_CTL	COMMD2	9.98638e-07	TRUE	vRG	0.559533	0.418525
1.23601e-07	0.26219	0.22	0.233	0.00328865	DS_vs_CTL	PPP4R3B	1.01713e-06	TRUE	vRG	0.946464	1.13532
1.23896e-07	-0.408855	0.101	0.167	0.0032965	DS_vs_CTL	API5	1.01862e-06	TRUE	vRG	0.61808	0.46532
1.24154e-07	-1.07408	0.074	0.154	0.00330335	DS_vs_CTL	CENPF	1.01981e-06	TRUE	vRG	1.01622	0.48216
1.24674e-07	0.00593407	0.093	0.13	0.00331721	DS_vs_CTL	CROT	1.02315e-06	FALSE	vRG	0.449853	0.451736
1.25778e-07	-1.27961	0.037	0.1	0.00334657	DS_vs_CTL	CYCS	1.03126e-06	TRUE	vRG	0.378435	0.155295
1.27444e-07	-0.196086	0.096	0.144	0.0033909	DS_vs_CTL	EXOSC10	1.04397e-06	FALSE	vRG	0.49963	0.436029
1.28153e-07	-0.410373	0.07	0.123	0.00340977	DS_vs_CTL	POMP	1.04882e-06	TRUE	vRG	0.43107	0.324118
1.28638e-07	0.117631	0.169	0.198	0.00342268	DS_vs_CTL	SUPT20H	1.05183e-06	FALSE	vRG	0.687283	0.745783
1.29063e-07	-1.00049	0.054	0.121	0.00343399	DS_vs_CTL	UQCR11	1.05435e-06	TRUE	vRG	0.41188	0.205376
1.29507e-07	-0.529882	0.094	0.161	0.0034458	DS_vs_CTL	ADH5	1.05701e-06	TRUE	vRG	0.598408	0.414171
1.30455e-07	-0.354921	0.108	0.169	0.00347102	DS_vs_CTL	ATF6B	1.06378e-06	TRUE	vRG	0.637348	0.498149
1.309e-07	0.100798	0.151	0.184	0.00348285	DS_vs_CTL	DZIP3	1.06644e-06	FALSE	vRG	0.670658	0.719292
1.31552e-07	0.0620145	0.277	0.338	0.00350021	DS_vs_CTL	RBBP6	1.07078e-06	FALSE	vRG	1.47418	1.539
1.31738e-07	0.0122308	0.117	0.159	0.00350516	DS_vs_CTL	PPIL4	1.07133e-06	FALSE	vRG	0.582899	0.587896
1.32255e-07	-0.182295	0.183	0.252	0.0035189	DS_vs_CTL	ARHGAP12	1.07455e-06	FALSE	vRG	1.05656	0.931046
1.34549e-07	0.744332	0.297	0.225	0.00357993	DS_vs_CTL	HLCS	1.0922e-06	TRUE	vRG	1.16062	1.94499
1.3573e-07	-0.0609188	0.197	0.254	0.00361137	DS_vs_CTL	HDAC2	1.1008e-06	FALSE	vRG	1.01242	0.970546
1.36219e-07	-0.37346	0.203	0.296	0.00362437	DS_vs_CTL	ITSN2	1.10222e-06	TRUE	vRG	1.36978	1.05716
1.36323e-07	-0.535935	0.16	0.254	0.00362716	DS_vs_CTL	GPC1	1.10222e-06	TRUE	vRG	0.853937	0.588674
1.36353e-07	-0.405943	0.284	0.402	0.00362795	DS_vs_CTL	RPL3	1.10222e-06	TRUE	vRG	1.85795	1.40205
1.36434e-07	0.00484143	0.222	0.277	0.0036301	DS_vs_CTL	SF3B1	1.10222e-06	FALSE	vRG	0.998606	1.00199
1.36519e-07	-0.038569	0.14	0.184	0.00363236	DS_vs_CTL	INTS3	1.10222e-06	FALSE	vRG	0.654201	0.636941
1.37948e-07	0.33398	0.105	0.123	0.00367038	DS_vs_CTL	GSTCD	1.11276e-06	TRUE	vRG	0.448259	0.565319
1.38353e-07	0.200592	0.263	0.303	0.00368117	DS_vs_CTL	WNK2	1.11502e-06	FALSE	vRG	1.17993	1.35612
1.38875e-07	0.200573	0.501	0.523	0.00369504	DS_vs_CTL	CEP170	1.11822e-06	FALSE	vRG	2.69831	3.10096
1.39263e-07	-0.119267	0.373	0.463	0.00370536	DS_vs_CTL	XRCC5	1.12034e-06	FALSE	vRG	2.29366	2.11162
1.39853e-07	-0.240408	0.145	0.207	0.00372107	DS_vs_CTL	CENPV	1.12408e-06	FALSE	vRG	0.72567	0.61415
1.41041e-07	-0.0216842	0.316	0.378	0.00375268	DS_vs_CTL	TULP4	1.13262e-06	FALSE	vRG	1.681	1.65593
1.41211e-07	1.33707	0.151	0.078	0.00375719	DS_vs_CTL	AC002463.1	1.13292e-06	TRUE	vRG	0.292605	0.740839
1.41331e-07	0.314167	0.209	0.218	0.0037604	DS_vs_CTL	TTC21B	1.13292e-06	TRUE	vRG	0.897444	1.11606
1.42124e-07	0.222129	0.197	0.219	0.0037815	DS_vs_CTL	MCCC1	1.13826e-06	FALSE	vRG	0.886117	1.03381
1.42413e-07	-0.12233	0.256	0.332	0.00378918	DS_vs_CTL	ZNF83	1.13956e-06	FALSE	vRG	1.47341	1.35357
1.42943e-07	0.354392	0.221	0.228	0.00380329	DS_vs_CTL	GJC1	1.14278e-06	TRUE	vRG	0.879773	1.12506
1.43513e-07	-0.157585	0.062	0.099	0.00381846	DS_vs_CTL	HSD17B12	1.14581e-06	FALSE	vRG	0.331274	0.296913
1.43578e-07	0.0516474	0.112	0.154	0.00382017	DS_vs_CTL	RAB18	1.14581e-06	FALSE	vRG	0.544917	0.564841
1.43839e-07	0.0574832	0.22	0.266	0.00382712	DS_vs_CTL	CAPN7	1.14688e-06	FALSE	vRG	1.10717	1.15224
1.44982e-07	1.37063	0.082	0.026	0.00385754	DS_vs_CTL	DSCAM	1.15497e-06	TRUE	vRG	0.170003	0.441272
1.45595e-07	-0.436104	0.09	0.148	0.00387385	DS_vs_CTL	CHORDC1	1.15882e-06	TRUE	vRG	0.534142	0.394554
1.45744e-07	0.150212	0.255	0.293	0.00387782	DS_vs_CTL	TTC14	1.15898e-06	FALSE	vRG	1.10015	1.22101
1.4629e-07	-0.402088	0.064	0.116	0.00389233	DS_vs_CTL	ANKRD29	1.16229e-06	TRUE	vRG	0.44514	0.336638
1.46604e-07	0.330569	0.254	0.265	0.0039007	DS_vs_CTL	AKAP8L	1.16376e-06	TRUE	vRG	0.887598	1.11646
1.47582e-07	0.169721	0.164	0.196	0.00392672	DS_vs_CTL	ORC3	1.17049e-06	FALSE	vRG	0.758422	0.853259
1.48174e-07	-0.126063	0.157	0.213	0.00394246	DS_vs_CTL	AP1G1	1.17414e-06	FALSE	vRG	0.783005	0.717428
1.49327e-07	0.0831578	0.152	0.189	0.00397314	DS_vs_CTL	EIF5	1.18224e-06	FALSE	vRG	0.674583	0.714696
1.49591e-07	-0.353447	0.101	0.17	0.00398017	DS_vs_CTL	EDF1	1.18328e-06	TRUE	vRG	0.462111	0.3615
1.49866e-07	-0.169378	0.136	0.192	0.00398748	DS_vs_CTL	ZC3H7A	1.18441e-06	FALSE	vRG	0.728637	0.647833
1.50161e-07	-0.596826	0.076	0.144	0.00399534	DS_vs_CTL	CAPS2	1.18571e-06	TRUE	vRG	0.587556	0.38817
1.50541e-07	0.211055	0.426	0.438	0.00400545	DS_vs_CTL	RFTN2	1.18766e-06	FALSE	vRG	2.44527	2.83068
1.52459e-07	-0.126609	0.081	0.13	0.00405648	DS_vs_CTL	CALM3	1.20086e-06	FALSE	vRG	0.397321	0.363876
1.52519e-07	-0.0855583	0.17	0.228	0.00405807	DS_vs_CTL	ELOVL2	1.20086e-06	FALSE	vRG	0.922358	0.869214
1.52923e-07	-0.662445	0.041	0.093	0.00406881	DS_vs_CTL	NDUFB4	1.20086e-06	TRUE	vRG	0.288188	0.181723
1.53018e-07	-0.168022	0.082	0.128	0.00407136	DS_vs_CTL	MFAP2	1.20086e-06	FALSE	vRG	0.37998	0.338116
1.53034e-07	-0.43544	0.115	0.188	0.00407177	DS_vs_CTL	ARHGEF40	1.20086e-06	TRUE	vRG	0.751556	0.555506
1.53105e-07	-0.106704	0.029	0.061	0.00407367	DS_vs_CTL	EIF3G	1.20086e-06	FALSE	vRG	0.13397	0.124371
1.53269e-07	-0.634929	0.04	0.089	0.00407802	DS_vs_CTL	AC080038.1	1.20086e-06	TRUE	vRG	0.342929	0.220493
1.5331e-07	-0.392182	0.081	0.137	0.00407912	DS_vs_CTL	GOLGA2	1.20086e-06	TRUE	vRG	0.466068	0.354911
1.53418e-07	-0.0906272	0.194	0.256	0.00408198	DS_vs_CTL	THOC1	1.20086e-06	FALSE	vRG	1.03176	0.968898
1.5359e-07	0.187462	0.18	0.205	0.00408657	DS_vs_CTL	LINC00685	1.20116e-06	FALSE	vRG	0.788852	0.898481
1.54899e-07	0.0907956	0.074	0.107	0.0041214	DS_vs_CTL	COQ9	1.20965e-06	FALSE	vRG	0.331433	0.353055
1.54945e-07	0.0551391	0.277	0.324	0.00412263	DS_vs_CTL	NRF1	1.20965e-06	FALSE	vRG	1.47295	1.5304
1.55599e-07	-1.28619	0.107	0.193	0.00414003	DS_vs_CTL	ADAMTSL1	1.2137e-06	TRUE	vRG	0.920703	0.376931
1.55905e-07	-0.80352	0.028	0.074	0.00414817	DS_vs_CTL	MANF	1.21503e-06	TRUE	vRG	0.2378	0.13583
1.56045e-07	-0.673975	0.165	0.266	0.0041519	DS_vs_CTL	TSPAN3	1.21507e-06	TRUE	vRG	1.28728	0.806479
1.5699e-07	-0.187983	0.113	0.166	0.00417704	DS_vs_CTL	DDX1	1.22137e-06	FALSE	vRG	0.590996	0.518693
1.58753e-07	0.128041	0.122	0.154	0.00422394	DS_vs_CTL	SPOPL	1.23401e-06	FALSE	vRG	0.562902	0.615265
1.59515e-07	-0.0649318	0.036	0.064	0.00424423	DS_vs_CTL	TCOF1	1.23887e-06	FALSE	vRG	0.194457	0.185878
1.59798e-07	0.320571	0.831	0.806	0.00425175	DS_vs_CTL	BASP1	1.23943e-06	TRUE	vRG	7.09808	8.86454
1.59865e-07	0.0397552	0.155	0.197	0.00425352	DS_vs_CTL	AC008969.1	1.23943e-06	FALSE	vRG	0.782212	0.80412
1.60657e-07	-0.455748	0.053	0.099	0.00427459	DS_vs_CTL	SELENOT	1.2445e-06	TRUE	vRG	0.328948	0.239591
1.60907e-07	-0.171736	0.439	0.545	0.00428125	DS_vs_CTL	OGA	1.24536e-06	FALSE	vRG	2.73015	2.42366
1.62121e-07	-0.268158	0.111	0.172	0.00431355	DS_vs_CTL	DOT1L	1.25302e-06	TRUE	vRG	0.581045	0.482337
1.62175e-07	0.656851	0.279	0.223	0.004315	DS_vs_CTL	TNFRSF19	1.25302e-06	TRUE	vRG	1.14162	1.80055
1.64201e-07	-0.440094	0.043	0.084	0.00436889	DS_vs_CTL	ZMAT3	1.26702e-06	TRUE	vRG	0.255739	0.188255
1.6427e-07	-0.148386	0.144	0.203	0.00437073	DS_vs_CTL	CHD4	1.26702e-06	FALSE	vRG	0.760203	0.685824
1.65067e-07	-0.250288	0.212	0.29	0.00439195	DS_vs_CTL	KIF5B	1.27115e-06	TRUE	vRG	1.20849	1.01587
1.65088e-07	0.0321427	0.174	0.231	0.00439251	DS_vs_CTL	TIA1	1.27115e-06	FALSE	vRG	0.551348	0.563818
1.65404e-07	0.191492	0.266	0.29	0.00440091	DS_vs_CTL	MAPKAP1	1.27214e-06	FALSE	vRG	1.27403	1.45505
1.65501e-07	0.243471	0.119	0.14	0.00440347	DS_vs_CTL	TOB2	1.27214e-06	FALSE	vRG	0.482504	0.571423
1.66903e-07	0.845646	0.217	0.151	0.0044408	DS_vs_CTL	EVA1C	1.28183e-06	TRUE	vRG	0.775806	1.39503
1.67237e-07	0.73418	0.276	0.211	0.00444968	DS_vs_CTL	LSS	1.2833e-06	TRUE	vRG	0.789388	1.31382
1.67452e-07	0.440884	0.113	0.118	0.00445538	DS_vs_CTL	RAB11FIP2	1.28384e-06	TRUE	vRG	0.411664	0.559203
1.68399e-07	-0.224196	0.092	0.142	0.00448059	DS_vs_CTL	CCDC47	1.29e-06	FALSE	vRG	0.545033	0.466464
1.69212e-07	0.373198	0.151	0.163	0.00450223	DS_vs_CTL	SKIL	1.29513e-06	TRUE	vRG	0.585328	0.758461
1.70181e-07	0.443742	0.522	0.477	0.00452801	DS_vs_CTL	NFIX	1.30144e-06	TRUE	vRG	2.6956	3.66676
1.71316e-07	0.591389	0.115	0.113	0.00455819	DS_vs_CTL	PRKCQ	1.309e-06	TRUE	vRG	0.44379	0.669207
1.71551e-07	0.932336	0.244	0.185	0.00456446	DS_vs_CTL	DOK6	1.30968e-06	TRUE	vRG	0.591407	1.12959
1.72823e-07	-0.221882	0.096	0.15	0.00459831	DS_vs_CTL	SMC4	1.3173e-06	FALSE	vRG	0.547073	0.468963
1.72842e-07	0.432536	0.684	0.62	0.0045988	DS_vs_CTL	APP	1.3173e-06	TRUE	vRG	3.84081	5.18396
1.75893e-07	-0.801782	0.029	0.078	0.00467999	DS_vs_CTL	TMSB15A	1.33941e-06	TRUE	vRG	0.250272	0.143149
1.76324e-07	-0.655452	0.076	0.146	0.00469145	DS_vs_CTL	ATP6V0C	1.34156e-06	TRUE	vRG	0.566114	0.359059
1.7757e-07	-0.415974	0.038	0.077	0.00472461	DS_vs_CTL	PRPF38A	1.34989e-06	TRUE	vRG	0.211356	0.15818
1.78609e-07	-0.211522	0.083	0.134	0.00475225	DS_vs_CTL	TRIM27	1.35664e-06	FALSE	vRG	0.45503	0.392859
1.80203e-07	-0.835664	0.085	0.166	0.00479465	DS_vs_CTL	PPP1R14B	1.36759e-06	TRUE	vRG	0.488407	0.273236
1.80706e-07	0.133735	0.088	0.115	0.00480804	DS_vs_CTL	TACC2	1.36813e-06	FALSE	vRG	0.388758	0.426644
1.80776e-07	-0.306175	0.25	0.344	0.0048099	DS_vs_CTL	CARHSP1	1.36813e-06	TRUE	vRG	1.63751	1.32422
1.808e-07	0.55244	0.138	0.13	0.00481054	DS_vs_CTL	RPGRIP1L	1.36813e-06	TRUE	vRG	0.484187	0.7106
1.80884e-07	-0.826871	0.06	0.124	0.00481278	DS_vs_CTL	TKT	1.36813e-06	TRUE	vRG	0.470795	0.264984
1.815e-07	-0.82383	0.064	0.13	0.00482918	DS_vs_CTL	TAGLN2	1.37097e-06	TRUE	vRG	0.527585	0.297628
1.81725e-07	-0.394421	0.134	0.205	0.00483517	DS_vs_CTL	C2orf72	1.37097e-06	TRUE	vRG	0.804991	0.612209
1.81759e-07	-0.426574	0.173	0.261	0.00483605	DS_vs_CTL	ZNF528-AS1	1.37097e-06	TRUE	vRG	1.19471	0.888654
1.81869e-07	-0.226298	0.225	0.309	0.00483899	DS_vs_CTL	SPATA5	1.37097e-06	FALSE	vRG	1.51143	1.29188
1.83337e-07	-0.170436	0.145	0.204	0.00487805	DS_vs_CTL	FAM193B	1.38087e-06	FALSE	vRG	0.751006	0.667234
1.83594e-07	0.511516	0.095	0.108	0.00488487	DS_vs_CTL	APBB1	1.38107e-06	TRUE	vRG	0.287718	0.410622
1.83671e-07	-0.106878	0.648	0.743	0.00488692	DS_vs_CTL	BAZ2B	1.38107e-06	FALSE	vRG	5.89626	5.47519
1.83833e-07	-0.102581	0.281	0.349	0.00489125	DS_vs_CTL	PPP3CB	1.38113e-06	FALSE	vRG	1.49859	1.39569
1.84157e-07	0.355629	0.266	0.266	0.00489986	DS_vs_CTL	NT5C2	1.38241e-06	TRUE	vRG	1.05154	1.3458
1.85313e-07	-0.017435	0.122	0.165	0.00493063	DS_vs_CTL	MRPL42	1.38966e-06	FALSE	vRG	0.568151	0.561339
1.85432e-07	0.295934	0.173	0.182	0.00493379	DS_vs_CTL	TRMT13	1.38966e-06	TRUE	vRG	0.658719	0.808957
1.88938e-07	-0.432492	0.075	0.132	0.00502708	DS_vs_CTL	MTG2	1.41475e-06	TRUE	vRG	0.557001	0.412484
1.9029e-07	-0.00603293	0.056	0.087	0.00506306	DS_vs_CTL	DIS3	1.42369e-06	FALSE	vRG	0.271443	0.270331
1.90865e-07	0.074036	0.1	0.132	0.00507834	DS_vs_CTL	UBE3B	1.4268e-06	FALSE	vRG	0.463712	0.48821
1.93701e-07	-0.301987	0.121	0.186	0.0051538	DS_vs_CTL	SUB1	1.44599e-06	TRUE	vRG	0.691471	0.560705
1.93755e-07	-0.308163	0.162	0.245	0.00515524	DS_vs_CTL	PEBP1	1.44599e-06	TRUE	vRG	0.807563	0.65207
1.96182e-07	-0.0457965	0.259	0.322	0.00521982	DS_vs_CTL	FUBP1	1.46289e-06	FALSE	vRG	1.24443	1.20554
1.9737e-07	-0.244012	0.287	0.381	0.00525142	DS_vs_CTL	MTG1	1.47017e-06	FALSE	vRG	1.67043	1.41036
1.97485e-07	0.150218	0.254	0.281	0.00525449	DS_vs_CTL	UNK	1.47017e-06	FALSE	vRG	1.17058	1.29918
1.98175e-07	-0.263229	0.137	0.203	0.00527283	DS_vs_CTL	DGKD	1.47408e-06	TRUE	vRG	0.774187	0.644921
1.98375e-07	-0.433425	0.085	0.145	0.00527816	DS_vs_CTL	ARPC5	1.47434e-06	TRUE	vRG	0.530373	0.392498
1.99136e-07	-0.2525	0.143	0.207	0.0052984	DS_vs_CTL	IDH2	1.47878e-06	TRUE	vRG	0.857551	0.719722
1.99614e-07	-0.879975	0.051	0.115	0.00531112	DS_vs_CTL	PNMA1	1.4811e-06	TRUE	vRG	0.30284	0.164108
2.01139e-07	-0.210077	0.164	0.224	0.00535172	DS_vs_CTL	DDX24	1.49015e-06	FALSE	vRG	0.935353	0.808489
2.01165e-07	1.52319	0.106	0.041	0.0053524	DS_vs_CTL	AP001442.1	1.49015e-06	TRUE	vRG	0.156146	0.450772
2.01903e-07	-0.296302	0.124	0.19	0.00537203	DS_vs_CTL	TMEM59	1.49438e-06	TRUE	vRG	0.713577	0.580925
2.02204e-07	-0.604448	0.061	0.114	0.00538005	DS_vs_CTL	ANP32E	1.49538e-06	TRUE	vRG	0.453147	0.297715
2.04375e-07	0.0908121	0.421	0.466	0.00543781	DS_vs_CTL	ADD1	1.51019e-06	FALSE	vRG	2.30142	2.45104
2.06075e-07	-0.228898	0.21	0.289	0.00548303	DS_vs_CTL	RNMT	1.5215e-06	FALSE	vRG	1.25969	1.07475
2.06561e-07	-0.863261	0.022	0.063	0.00549596	DS_vs_CTL	MMP15	1.52383e-06	TRUE	vRG	0.170134	0.0930823
2.07231e-07	-0.145206	0.094	0.137	0.00551381	DS_vs_CTL	MAGI2-AS3	1.52752e-06	FALSE	vRG	0.488734	0.441864
2.07624e-07	-0.0946705	0.22	0.278	0.00552426	DS_vs_CTL	PAPOLA	1.52917e-06	FALSE	vRG	1.07698	1.00854
2.09261e-07	-0.646869	0.068	0.134	0.00556781	DS_vs_CTL	PDAP1	1.53996e-06	TRUE	vRG	0.437203	0.278877
2.09607e-07	0.0175963	0.584	0.658	0.00557702	DS_vs_CTL	MLLT10	1.54124e-06	FALSE	vRG	4.22056	4.2724
2.10574e-07	-1.89305	0.016	0.063	0.00560274	DS_vs_CTL	C1QL1	1.54708e-06	TRUE	vRG	0.233896	0.0622404
2.11001e-07	-1.15058	0.055	0.123	0.0056141	DS_vs_CTL	BNIP3	1.54895e-06	TRUE	vRG	0.520346	0.233842
2.11288e-07	-0.139882	0.158	0.221	0.00562174	DS_vs_CTL	EIF3H	1.54979e-06	FALSE	vRG	0.85819	0.778817
2.11634e-07	0.350091	0.395	0.384	0.00563095	DS_vs_CTL	MAP2K5	1.55097e-06	TRUE	vRG	1.93657	2.46875
2.11795e-07	-0.291494	0.189	0.267	0.00563522	DS_vs_CTL	CDC16	1.55097e-06	TRUE	vRG	1.10321	0.901217
2.12511e-07	-1.58447	0.036	0.098	0.00565427	DS_vs_CTL	SEC61G	1.55495e-06	TRUE	vRG	0.345793	0.114637
2.14646e-07	0.311524	0.159	0.17	0.00571108	DS_vs_CTL	COL5A1	1.56929e-06	TRUE	vRG	0.705238	0.875489
2.15941e-07	-0.486303	0.351	0.474	0.00574555	DS_vs_CTL	HMGCS1	1.57748e-06	TRUE	vRG	4.37651	3.12391
2.16477e-07	0.239408	0.28	0.303	0.0057598	DS_vs_CTL	PSPC1	1.5801e-06	FALSE	vRG	1.21559	1.43523
2.18033e-07	-0.099201	0.144	0.193	0.0058012	DS_vs_CTL	DTWD1	1.59003e-06	FALSE	vRG	0.727018	0.678664
2.18191e-07	-0.456739	0.06	0.112	0.0058054	DS_vs_CTL	MYDGF	1.59003e-06	TRUE	vRG	0.40376	0.293936
2.20295e-07	-0.0718404	0.261	0.325	0.00586139	DS_vs_CTL	USP48	1.60406e-06	FALSE	vRG	1.31795	1.25391
2.20634e-07	-0.0738983	0.275	0.345	0.0058704	DS_vs_CTL	CSNK1G1	1.60523e-06	FALSE	vRG	1.56596	1.48774
2.22068e-07	-0.296937	0.153	0.224	0.00590857	DS_vs_CTL	ACSL3	1.61436e-06	TRUE	vRG	0.982201	0.799322
2.22862e-07	0.217073	0.379	0.393	0.0059297	DS_vs_CTL	KDM6A	1.61882e-06	FALSE	vRG	1.91787	2.22947
2.23465e-07	0.23118	0.27	0.289	0.00594574	DS_vs_CTL	OSBPL9	1.62188e-06	FALSE	vRG	1.22767	1.44123
2.24075e-07	-0.308524	0.12	0.183	0.00596197	DS_vs_CTL	CCDC82	1.625e-06	TRUE	vRG	0.69489	0.560926
2.24924e-07	0.166001	0.117	0.145	0.00598454	DS_vs_CTL	MAMLD1	1.62921e-06	FALSE	vRG	0.5359	0.601401
2.25019e-07	0.529014	0.103	0.11	0.00598709	DS_vs_CTL	MED4	1.62921e-06	TRUE	vRG	0.379858	0.548598
2.2558e-07	0.156035	0.307	0.339	0.006002	DS_vs_CTL	USP9X	1.63071e-06	FALSE	vRG	1.44616	1.61148
2.25589e-07	-0.379422	0.035	0.073	0.00600225	DS_vs_CTL	NDN	1.63071e-06	TRUE	vRG	0.225754	0.173333
2.30162e-07	-0.258692	0.204	0.285	0.00612392	DS_vs_CTL	PRPF40A	1.66126e-06	TRUE	vRG	1.25191	1.04626
2.30186e-07	0.0411901	0.461	0.519	0.00612456	DS_vs_CTL	PAN3	1.66126e-06	FALSE	vRG	2.93771	3.02285
2.30998e-07	-0.533875	0.041	0.094	0.00614616	DS_vs_CTL	ARL4C	1.66578e-06	TRUE	vRG	0.276284	0.190533
2.33518e-07	0.0830174	0.251	0.294	0.00621322	DS_vs_CTL	EPB41L5	1.68261e-06	FALSE	vRG	1.28946	1.36592
2.34488e-07	-0.58108	0.029	0.071	0.00623903	DS_vs_CTL	TIMM13	1.68824e-06	TRUE	vRG	0.178432	0.118956
2.35593e-07	-0.139024	0.164	0.224	0.00626842	DS_vs_CTL	NFX1	1.69483e-06	FALSE	vRG	0.923281	0.838392
2.36343e-07	-0.482092	0.06	0.112	0.00628838	DS_vs_CTL	PSMB1	1.69887e-06	TRUE	vRG	0.364394	0.260614
2.36741e-07	0.125946	0.111	0.146	0.00629896	DS_vs_CTL	TPM3	1.70037e-06	FALSE	vRG	0.468925	0.511822
2.38286e-07	-0.430155	0.086	0.147	0.00634007	DS_vs_CTL	COPE	1.7101e-06	TRUE	vRG	0.518027	0.384228
2.39018e-07	-0.0802959	0.543	0.636	0.00635956	DS_vs_CTL	SRRM2	1.71398e-06	FALSE	vRG	3.55133	3.35904
2.39733e-07	0.160495	0.254	0.285	0.00637858	DS_vs_CTL	WDR59	1.71774e-06	FALSE	vRG	1.16868	1.30634
2.40518e-07	0.62766	0.397	0.302	0.00639947	DS_vs_CTL	NELL1	1.72199e-06	TRUE	vRG	1.86594	2.88357
2.41509e-07	-0.749381	0.052	0.108	0.00642583	DS_vs_CTL	SERPINB6	1.7277e-06	TRUE	vRG	0.367439	0.218179
2.43784e-07	-0.871129	0.044	0.1	0.00648636	DS_vs_CTL	NUSAP1	1.74259e-06	TRUE	vRG	0.386561	0.210895
2.45344e-07	-1.19062	0.035	0.092	0.00652788	DS_vs_CTL	C5orf15	1.75108e-06	TRUE	vRG	0.310429	0.135446
2.45362e-07	-0.580764	0.049	0.098	0.00652834	DS_vs_CTL	BUD23	1.75108e-06	TRUE	vRG	0.287041	0.1916
2.45988e-07	0.605726	0.152	0.135	0.00654501	DS_vs_CTL	HK1	1.75416e-06	TRUE	vRG	0.491372	0.748309
2.46215e-07	-0.0638205	0.176	0.234	0.00655105	DS_vs_CTL	NUP107	1.75438e-06	FALSE	vRG	0.962057	0.920406
2.4871e-07	0.182846	0.19	0.219	0.00661743	DS_vs_CTL	ZNF302	1.77075e-06	FALSE	vRG	0.822892	0.934247
2.4952e-07	-0.106304	0.168	0.223	0.00663897	DS_vs_CTL	SERBP1	1.77511e-06	FALSE	vRG	0.859832	0.798705
2.51549e-07	-0.0846566	0.067	0.106	0.00669295	DS_vs_CTL	SARS	1.78731e-06	FALSE	vRG	0.332768	0.313769
2.51633e-07	-0.234558	0.154	0.22	0.00669519	DS_vs_CTL	EIF3A	1.78731e-06	FALSE	vRG	0.850384	0.72265
2.52361e-07	-0.0231693	0.284	0.341	0.00671458	DS_vs_CTL	ATAD2B	1.79107e-06	FALSE	vRG	1.54508	1.52047
2.5298e-07	0.453414	0.088	0.093	0.00673103	DS_vs_CTL	TRAM1	1.79404e-06	TRUE	vRG	0.312548	0.428374
2.53194e-07	0.543391	0.139	0.123	0.00673673	DS_vs_CTL	ITGB5	1.79414e-06	TRUE	vRG	0.472543	0.689181
2.53557e-07	-0.232763	0.088	0.139	0.0067464	DS_vs_CTL	STMP1	1.7953e-06	FALSE	vRG	0.488245	0.415369
2.55192e-07	-0.790991	0.041	0.092	0.0067899	DS_vs_CTL	ACSS1	1.80545e-06	TRUE	vRG	0.328404	0.189387
2.56256e-07	0.563645	0.09	0.093	0.00681819	DS_vs_CTL	CNOT9	1.81155e-06	TRUE	vRG	0.286954	0.424639
2.57005e-07	-0.289178	0.152	0.229	0.00683814	DS_vs_CTL	MGLL	1.81542e-06	TRUE	vRG	0.990829	0.8107
2.57259e-07	0.0353141	0.259	0.308	0.00684488	DS_vs_CTL	CTDSPL2	1.81578e-06	FALSE	vRG	1.33643	1.3696
2.62825e-07	0.394038	0.229	0.232	0.00699299	DS_vs_CTL	EPCAM-DT	1.85361e-06	TRUE	vRG	0.996778	1.31018
2.63229e-07	0.19819	0.191	0.222	0.00700372	DS_vs_CTL	CHPT1	1.855e-06	FALSE	vRG	0.855935	0.982156
2.63811e-07	-0.394145	0.047	0.091	0.00701922	DS_vs_CTL	POLD2	1.85764e-06	TRUE	vRG	0.256697	0.195108
2.64705e-07	0.0014892	0.283	0.343	0.007043	DS_vs_CTL	ZNF407	1.86248e-06	FALSE	vRG	1.62843	1.63014
2.67809e-07	-0.445953	0.139	0.218	0.00712559	DS_vs_CTL	OTUD7B	1.88284e-06	TRUE	vRG	0.963154	0.7068
2.68709e-07	0.198636	0.169	0.197	0.00714954	DS_vs_CTL	XPO7	1.88769e-06	FALSE	vRG	0.754842	0.866445
2.68979e-07	0.67275	0.339	0.256	0.00715672	DS_vs_CTL	NR6A1	1.88811e-06	TRUE	vRG	1.42579	2.27351
2.71414e-07	0.0747765	0.362	0.402	0.00722152	DS_vs_CTL	UBR1	1.90372e-06	FALSE	vRG	1.9379	2.04107
2.71819e-07	0.157981	0.226	0.255	0.00723228	DS_vs_CTL	RABEP1	1.90506e-06	FALSE	vRG	1.02924	1.14849
2.72534e-07	-0.0118394	0.204	0.252	0.00725131	DS_vs_CTL	PEAK1	1.90859e-06	FALSE	vRG	1.1584	1.14895
2.7385e-07	0.585234	0.063	0.07	0.00728633	DS_vs_CTL	CCNDBP1	1.91571e-06	TRUE	vRG	0.198125	0.297787
2.73978e-07	0.401764	0.131	0.145	0.00728973	DS_vs_CTL	ZNF286A	1.91571e-06	TRUE	vRG	0.500286	0.661297
2.74874e-07	-0.14102	0.385	0.475	0.00731357	DS_vs_CTL	ZNF148	1.91953e-06	FALSE	vRG	2.5223	2.28735
2.74952e-07	-0.651157	0.092	0.164	0.00731564	DS_vs_CTL	PPM1G	1.91953e-06	TRUE	vRG	0.635559	0.404353
2.75931e-07	0.0273541	0.311	0.366	0.00734168	DS_vs_CTL	ZNF131	1.92362e-06	FALSE	vRG	1.62099	1.65206
2.75966e-07	0.713766	0.272	0.206	0.00734262	DS_vs_CTL	HECW2	1.92362e-06	TRUE	vRG	0.902549	1.48094
2.77442e-07	-0.257524	0.131	0.189	0.0073819	DS_vs_CTL	ATP5F1C	1.93241e-06	TRUE	vRG	0.673718	0.563435
2.79944e-07	0.0216147	0.319	0.377	0.00744848	DS_vs_CTL	PRKDC	1.94833e-06	FALSE	vRG	1.75228	1.77878
2.81919e-07	-0.0142605	0.106	0.142	0.00750102	DS_vs_CTL	MEAF6	1.96055e-06	FALSE	vRG	0.490576	0.485766
2.84103e-07	-0.0334189	0.301	0.365	0.00755914	DS_vs_CTL	TTC37	1.97421e-06	FALSE	vRG	1.60964	1.57279
2.8441e-07	-0.157927	0.252	0.329	0.00756729	DS_vs_CTL	HUWE1	1.97481e-06	FALSE	vRG	1.37312	1.23066
2.84936e-07	0.331308	0.073	0.089	0.00758129	DS_vs_CTL	SLC22A15	1.97694e-06	TRUE	vRG	0.295988	0.372692
2.88824e-07	-0.530347	0.166	0.26	0.00768475	DS_vs_CTL	IQSEC1	2.00237e-06	TRUE	vRG	1.22807	0.850007
2.89573e-07	0.261147	0.223	0.25	0.00770467	DS_vs_CTL	GNG12	2.00601e-06	TRUE	vRG	1.10914	1.32946
2.90747e-07	0.105623	0.084	0.11	0.0077359	DS_vs_CTL	SF3A2	2.01259e-06	FALSE	vRG	0.351972	0.378812
2.91394e-07	-0.104318	0.181	0.242	0.00775312	DS_vs_CTL	DNAJB14	2.01551e-06	FALSE	vRG	1.02413	0.952641
2.9594e-07	0.126746	0.08	0.109	0.00787408	DS_vs_CTL	2024-03-02	2.04538e-06	FALSE	vRG	0.365937	0.399661
2.98927e-07	-0.080339	0.08	0.117	0.00795355	DS_vs_CTL	RBBP7	2.0637e-06	FALSE	vRG	0.377535	0.357055
2.9905e-07	-0.763773	0.23	0.337	0.00795683	DS_vs_CTL	CDK6	2.0637e-06	TRUE	vRG	2.24276	1.32048
2.99296e-07	-0.343291	0.063	0.109	0.00796336	DS_vs_CTL	ARMCX3	2.06381e-06	TRUE	vRG	0.358486	0.282379
3.02088e-07	0.312188	0.19	0.197	0.00803766	DS_vs_CTL	KANTR	2.08146e-06	TRUE	vRG	0.729393	0.905883
3.03884e-07	-0.716331	0.166	0.261	0.00808543	DS_vs_CTL	PEA15	2.09223e-06	TRUE	vRG	1.33657	0.813115
3.04417e-07	-0.187601	0.345	0.437	0.00809963	DS_vs_CTL	PHKB	2.0943e-06	FALSE	vRG	2.16842	1.90392
3.04703e-07	-0.0214811	0.206	0.262	0.00810724	DS_vs_CTL	COPA	2.09466e-06	FALSE	vRG	1.01523	1.00024
3.05068e-07	0.427638	0.442	0.394	0.00811696	DS_vs_CTL	NAV1	2.09557e-06	TRUE	vRG	2.13887	2.87723
3.07608e-07	0.239501	0.118	0.139	0.00818452	DS_vs_CTL	ARMH1	2.11139e-06	FALSE	vRG	0.527673	0.623175
3.09661e-07	-0.14066	0.148	0.202	0.00823916	DS_vs_CTL	SLC3A2	2.12314e-06	FALSE	vRG	0.74353	0.674388
3.09792e-07	1.47911	0.11	0.053	0.00824262	DS_vs_CTL	AC023424.3	2.12314e-06	TRUE	vRG	0.211586	0.59173
3.10404e-07	0.660569	0.156	0.132	0.00825891	DS_vs_CTL	WDR49	2.12571e-06	TRUE	vRG	0.575029	0.909579
3.11215e-07	-0.173393	0.281	0.357	0.00828049	DS_vs_CTL	PCNX4	2.12964e-06	FALSE	vRG	1.65301	1.46572
3.14524e-07	-0.0227158	0.137	0.182	0.00836854	DS_vs_CTL	INTS7	2.15064e-06	FALSE	vRG	0.709408	0.698335
3.15957e-07	-0.273162	0.367	0.476	0.00840665	DS_vs_CTL	PRKCA	2.1588e-06	TRUE	vRG	2.98522	2.47013
3.16954e-07	-0.126549	0.194	0.256	0.0084332	DS_vs_CTL	SNX6	2.16397e-06	FALSE	vRG	1.12982	1.03488
3.20358e-07	-0.674517	0.312	0.425	0.00852377	DS_vs_CTL	AP002989.1	2.18554e-06	TRUE	vRG	4.94372	3.09709
3.24895e-07	-0.000758147	0.246	0.293	0.00864447	DS_vs_CTL	VPS36	2.21481e-06	FALSE	vRG	1.24661	1.24598
3.25514e-07	-0.10512	0.105	0.148	0.00866095	DS_vs_CTL	EIF3M	2.21735e-06	FALSE	vRG	0.52128	0.484601
3.26076e-07	0.890227	0.072	0.07	0.00867589	DS_vs_CTL	AMOTL2	2.21949e-06	TRUE	vRG	0.189248	0.351675
3.30605e-07	-0.985596	0.033	0.085	0.0087964	DS_vs_CTL	NDUFA1	2.24861e-06	TRUE	vRG	0.288829	0.145375
3.31447e-07	-1.59582	0.045	0.106	0.0088188	DS_vs_CTL	SPON1	2.25263e-06	TRUE	vRG	0.721902	0.238162
3.329e-07	-0.937581	0.309	0.425	0.00885747	DS_vs_CTL	CLU	2.2608e-06	TRUE	vRG	3.8606	2.01518
3.35177e-07	-0.45463	0.139	0.219	0.00891805	DS_vs_CTL	LIMS1	2.27454e-06	TRUE	vRG	0.961981	0.7017
3.38408e-07	-0.182436	0.209	0.275	0.00900403	DS_vs_CTL	WASF2	2.29474e-06	FALSE	vRG	1.23379	1.08714
3.38739e-07	-0.0435574	0.162	0.212	0.00901283	DS_vs_CTL	NOTCH3	2.29524e-06	FALSE	vRG	0.920463	0.893082
3.40354e-07	-0.555682	0.094	0.168	0.00905579	DS_vs_CTL	AC009041.2	2.30445e-06	TRUE	vRG	0.552557	0.375617
3.41044e-07	-0.16129	0.092	0.139	0.00907415	DS_vs_CTL	ATP5F1A	2.30738e-06	FALSE	vRG	0.450922	0.403141
3.43062e-07	0.498837	0.177	0.162	0.00912785	DS_vs_CTL	ENOSF1	2.31928e-06	TRUE	vRG	0.713994	1.00938
3.44435e-07	0.202899	0.359	0.411	0.00916439	DS_vs_CTL	HNRNPDL	2.32682e-06	FALSE	vRG	1.32485	1.5251
3.44769e-07	0.277977	0.061	0.084	0.00917327	DS_vs_CTL	DDX56	2.32732e-06	TRUE	vRG	0.218196	0.264806
3.45353e-07	0.0582933	0.143	0.183	0.0091888	DS_vs_CTL	NDUFB8	2.328e-06	FALSE	vRG	0.648506	0.675314
3.45388e-07	0.123617	0.281	0.317	0.00918973	DS_vs_CTL	TRPC4AP	2.328e-06	FALSE	vRG	1.32753	1.44642
3.46096e-07	-0.0956592	0.731	0.824	0.00920858	DS_vs_CTL	ARHGAP21	2.33102e-06	FALSE	vRG	7.57081	7.08506
3.46455e-07	-0.485511	0.076	0.138	0.00921814	DS_vs_CTL	GPX4	2.33169e-06	TRUE	vRG	0.431212	0.307719
3.47489e-07	-0.397744	0.185	0.272	0.00924563	DS_vs_CTL	GLI2	2.33689e-06	TRUE	vRG	1.35244	1.02634
3.49905e-07	-0.256192	0.507	0.626	0.00930992	DS_vs_CTL	SETD5	2.35062e-06	TRUE	vRG	4.01146	3.35863
3.50132e-07	2.23266	0.056	0.016	0.00931597	DS_vs_CTL	AF130359.1	2.35062e-06	TRUE	vRG	0.0687299	0.326895
3.50472e-07	-0.228659	0.199	0.278	0.00932501	DS_vs_CTL	HNRNPK	2.35062e-06	FALSE	vRG	0.982079	0.838007
3.50691e-07	-0.472059	0.278	0.392	0.00933083	DS_vs_CTL	TRERF1	2.35062e-06	TRUE	vRG	2.07971	1.49907
3.50838e-07	0.00242831	0.32	0.372	0.00933476	DS_vs_CTL	BMP2K	2.35062e-06	FALSE	vRG	1.74336	1.74632
3.51608e-07	-0.199683	0.102	0.152	0.00935524	DS_vs_CTL	LRRC58	2.35402e-06	FALSE	vRG	0.549612	0.478461
3.52491e-07	-0.013379	0.551	0.63	0.00937873	DS_vs_CTL	CUX1	2.35817e-06	FALSE	vRG	4.29102	4.25142
3.53941e-07	-0.390875	0.065	0.113	0.00941731	DS_vs_CTL	CCNT1	2.36611e-06	TRUE	vRG	0.41645	0.317392
3.54312e-07	-0.111122	0.328	0.407	0.00942719	DS_vs_CTL	APBA2	2.36683e-06	FALSE	vRG	1.93363	1.79023
3.5482e-07	-0.29184	0.122	0.182	0.00944069	DS_vs_CTL	REXO2	2.36846e-06	TRUE	vRG	0.7341	0.599492
3.55328e-07	0.223398	0.177	0.196	0.0094542	DS_vs_CTL	PIAS2	2.369e-06	FALSE	vRG	0.734364	0.857554
3.5543e-07	0.2553	0.238	0.246	0.00945692	DS_vs_CTL	SOAT1	2.369e-06	TRUE	vRG	1.07589	1.28439
3.57343e-07	-0.0298699	0.296	0.359	0.00950782	DS_vs_CTL	TPR	2.37999e-06	FALSE	vRG	1.67054	1.63631
3.61581e-07	-0.316931	0.1	0.159	0.00962059	DS_vs_CTL	TMBIM4	2.40643e-06	TRUE	vRG	0.577274	0.463242
3.62236e-07	2.56953	0.051	0.011	0.009638	DS_vs_CTL	LANCL1-AS1	2.40742e-06	TRUE	vRG	0.0379855	0.230635
3.62266e-07	0.115756	0.184	0.223	0.00963882	DS_vs_CTL	TRIOBP	2.40742e-06	FALSE	vRG	0.771633	0.836209
3.65629e-07	0.145194	0.186	0.214	0.00972828	DS_vs_CTL	GPR107	2.42797e-06	FALSE	vRG	0.848704	0.938699
3.69646e-07	0.0865256	0.194	0.231	0.00983516	DS_vs_CTL	KDM4C	2.45283e-06	FALSE	vRG	0.996122	1.05778
3.73236e-07	0.19052	0.401	0.417	0.0099307	DS_vs_CTL	SH3RF1	2.47483e-06	FALSE	vRG	2.39883	2.73766
3.7661e-07	-0.121367	0.229	0.298	0.0100205	DS_vs_CTL	EPS15L1	2.49536e-06	FALSE	vRG	1.22765	1.12854
3.77229e-07	-0.670046	0.079	0.148	0.0100369	DS_vs_CTL	MTERF1	2.49761e-06	TRUE	vRG	0.671023	0.421369
3.85384e-07	0.458424	0.287	0.259	0.0102539	DS_vs_CTL	PKNOX1	2.54972e-06	TRUE	vRG	1.06485	1.46356
3.89199e-07	0.129036	0.133	0.157	0.0103554	DS_vs_CTL	DNMBP	2.57246e-06	FALSE	vRG	0.632522	0.691825
3.89493e-07	0.401241	0.072	0.089	0.0103632	DS_vs_CTL	KIAA0895L	2.57246e-06	TRUE	vRG	0.152377	0.201594
3.8968e-07	-0.534194	0.124	0.21	0.0103682	DS_vs_CTL	RPL7	2.57246e-06	TRUE	vRG	0.779692	0.538116
3.9284e-07	0.0243191	0.137	0.173	0.0104523	DS_vs_CTL	NMT1	2.59142e-06	FALSE	vRG	0.640082	0.651006
3.99444e-07	0.0364423	0.229	0.274	0.010628	DS_vs_CTL	BRD4	2.63141e-06	FALSE	vRG	1.10411	1.13241
3.99489e-07	0.0502987	0.263	0.3	0.0106292	DS_vs_CTL	PPP4R1	2.63141e-06	FALSE	vRG	1.28914	1.33494
4.02408e-07	-0.612341	0.057	0.111	0.0107069	DS_vs_CTL	EMP2	2.6487e-06	TRUE	vRG	0.440217	0.287628
4.07253e-07	0.0909483	0.043	0.068	0.0108358	DS_vs_CTL	PNKD	2.67862e-06	FALSE	vRG	0.182155	0.194101
4.10521e-07	-0.0353248	0.267	0.324	0.0109227	DS_vs_CTL	NUTM2A-AS1	2.69814e-06	FALSE	vRG	1.37964	1.34627
4.11163e-07	-0.0286497	0.142	0.186	0.0109398	DS_vs_CTL	NR2C1	2.70038e-06	FALSE	vRG	0.696307	0.68262
4.12571e-07	-0.00128966	0.291	0.353	0.0109773	DS_vs_CTL	SRSF4	2.70765e-06	FALSE	vRG	1.60465	1.60324
4.13223e-07	-0.200797	0.255	0.336	0.0109946	DS_vs_CTL	MDM4	2.70994e-06	FALSE	vRG	1.33919	1.16508
4.16835e-07	0.265303	0.168	0.184	0.0110907	DS_vs_CTL	RBM23	2.73164e-06	TRUE	vRG	0.730927	0.878727
4.18576e-07	0.119257	0.249	0.281	0.0111371	DS_vs_CTL	RAD50	2.74105e-06	FALSE	vRG	1.20307	1.30686
4.19881e-07	0.184781	0.341	0.369	0.0111718	DS_vs_CTL	CCDC14	2.74759e-06	FALSE	vRG	1.66856	1.89673
4.25901e-07	-0.14545	0.12	0.167	0.0113319	DS_vs_CTL	MIA3	2.784e-06	FALSE	vRG	0.606979	0.548694
4.26065e-07	0.0391718	0.189	0.226	0.0113363	DS_vs_CTL	DIPK2A	2.784e-06	FALSE	vRG	1.00359	1.03127
4.26511e-07	-0.112628	0.248	0.315	0.0113482	DS_vs_CTL	RNF216	2.78488e-06	FALSE	vRG	1.38267	1.27878
4.27301e-07	0.161449	0.338	0.368	0.0113692	DS_vs_CTL	RDX	2.78801e-06	FALSE	vRG	1.70248	1.90421
4.27799e-07	0.360989	0.276	0.278	0.0113825	DS_vs_CTL	RETREG1	2.78924e-06	TRUE	vRG	1.28894	1.65571
4.30515e-07	-0.367243	0.099	0.157	0.0114547	DS_vs_CTL	CPNE2	2.80491e-06	TRUE	vRG	0.634816	0.491941
4.33405e-07	-0.701495	0.047	0.098	0.0115316	DS_vs_CTL	F2R	2.82169e-06	TRUE	vRG	0.325312	0.199672
4.33746e-07	-0.17818	0.147	0.204	0.0115407	DS_vs_CTL	WASHC4	2.82186e-06	FALSE	vRG	0.780945	0.690117
4.34599e-07	-0.508785	0.152	0.24	0.0115634	DS_vs_CTL	FAM53B	2.82536e-06	TRUE	vRG	1.03301	0.725731
4.38435e-07	0.0299899	0.231	0.274	0.0116654	DS_vs_CTL	YTHDC2	2.84824e-06	FALSE	vRG	1.07276	1.09534
4.39294e-07	0.240746	0.181	0.211	0.0116883	DS_vs_CTL	PTOV1	2.85176e-06	FALSE	vRG	0.619609	0.732346
4.41539e-07	-0.672569	0.056	0.113	0.011748	DS_vs_CTL	SNHG7	2.86329e-06	TRUE	vRG	0.322378	0.201895
4.41708e-07	-0.304363	0.048	0.085	0.0117525	DS_vs_CTL	HDAC7	2.86329e-06	TRUE	vRG	0.244376	0.197723
4.43381e-07	0.680967	0.157	0.13	0.011797	DS_vs_CTL	VPS26C	2.87083e-06	TRUE	vRG	0.475636	0.763196
4.43511e-07	-1.32886	0.078	0.152	0.0118005	DS_vs_CTL	TENM3	2.87083e-06	TRUE	vRG	0.941769	0.374302
4.46053e-07	-0.139051	0.228	0.298	0.0118681	DS_vs_CTL	CERT1	2.8852e-06	FALSE	vRG	1.33637	1.21351
4.46705e-07	-0.278661	0.209	0.293	0.0118855	DS_vs_CTL	DDX39B	2.88734e-06	TRUE	vRG	1.06252	0.875736
4.48026e-07	-0.324169	0.088	0.147	0.0119206	DS_vs_CTL	NT5C	2.8938e-06	TRUE	vRG	0.362038	0.288997
4.52605e-07	-0.708022	0.055	0.112	0.0120425	DS_vs_CTL	NDUFB2	2.91956e-06	TRUE	vRG	0.391837	0.239489
4.52963e-07	2.32395	0.058	0.018	0.012052	DS_vs_CTL	AC022872.1	2.91956e-06	TRUE	vRG	0.052256	0.265829
4.5299e-07	-0.404646	0.3	0.416	0.0120527	DS_vs_CTL	RPL37A	2.91956e-06	TRUE	vRG	1.78829	1.35069
4.57012e-07	0.333459	0.363	0.359	0.0121597	DS_vs_CTL	MICU1	2.94337e-06	TRUE	vRG	1.86542	2.35078
4.57964e-07	0.746428	0.146	0.117	0.0121851	DS_vs_CTL	VASH1	2.94738e-06	TRUE	vRG	0.392356	0.658958
4.59695e-07	-0.290937	0.101	0.155	0.0122311	DS_vs_CTL	CKLF	2.95483e-06	TRUE	vRG	0.656643	0.536556
4.59841e-07	0.309267	0.351	0.346	0.012235	DS_vs_CTL	CDC42SE2	2.95483e-06	TRUE	vRG	1.71413	2.12422
4.60109e-07	-0.198939	0.186	0.255	0.0122421	DS_vs_CTL	INPP4A	2.95483e-06	FALSE	vRG	1.00277	0.873499
4.60592e-07	-0.0500405	0.165	0.217	0.012255	DS_vs_CTL	NOL10	2.9552e-06	FALSE	vRG	0.943725	0.911543
4.60824e-07	-0.0553068	0.285	0.353	0.0122611	DS_vs_CTL	ETNK1	2.9552e-06	FALSE	vRG	1.50099	1.44452
4.61441e-07	-0.925432	0.053	0.115	0.0122776	DS_vs_CTL	CHRDL1	2.95705e-06	TRUE	vRG	0.505524	0.265704
4.63754e-07	-0.0781049	0.1	0.144	0.0123391	DS_vs_CTL	NFATC2IP	2.96975e-06	FALSE	vRG	0.492131	0.466167
4.6684e-07	-0.924893	0.022	0.062	0.0124212	DS_vs_CTL	TMED7	2.98738e-06	TRUE	vRG	0.192616	0.100989
4.70916e-07	-0.36416	0.128	0.198	0.0125297	DS_vs_CTL	LNPK	3.01131e-06	TRUE	vRG	0.764585	0.593816
4.75013e-07	-0.773252	0.04	0.093	0.0126387	DS_vs_CTL	PSMB3	3.03535e-06	TRUE	vRG	0.308766	0.180253
4.80316e-07	-1.01516	0.027	0.074	0.0127798	DS_vs_CTL	PRDX3	3.06706e-06	TRUE	vRG	0.244333	0.120391
4.80676e-07	-0.0573742	0.115	0.157	0.0127893	DS_vs_CTL	CHIC1	3.06717e-06	FALSE	vRG	0.560891	0.539008
4.84688e-07	0.0641172	0.153	0.193	0.0128961	DS_vs_CTL	ACTR10	3.09057e-06	FALSE	vRG	0.717602	0.750285
4.8532e-07	-0.861254	0.316	0.412	0.0129129	DS_vs_CTL	2024-03-01	3.09241e-06	TRUE	vRG	3.57203	1.96587
4.88044e-07	0.103081	0.516	0.562	0.0129854	DS_vs_CTL	CHD2	3.10756e-06	FALSE	vRG	3.2441	3.48447
4.899e-07	-0.0204779	0.303	0.359	0.0130348	DS_vs_CTL	SCAF11	3.115e-06	FALSE	vRG	1.72533	1.70103
4.90069e-07	0.330001	0.635	0.608	0.0130393	DS_vs_CTL	ASB3	3.115e-06	TRUE	vRG	4.08445	5.1345
4.90254e-07	-0.308728	0.122	0.184	0.0130442	DS_vs_CTL	PRXL2A	3.115e-06	TRUE	vRG	0.670023	0.540771
4.91518e-07	-0.677699	0.055	0.109	0.0130778	DS_vs_CTL	CLDND1	3.11805e-06	TRUE	vRG	0.380123	0.237275
4.9153e-07	-0.693597	0.035	0.084	0.0130781	DS_vs_CTL	ENHO	3.11805e-06	TRUE	vRG	0.266752	0.164565
4.91776e-07	-0.476845	0.062	0.113	0.0130847	DS_vs_CTL	EIF4H	3.11805e-06	TRUE	vRG	0.353433	0.253691
4.94385e-07	-0.587215	0.126	0.215	0.0131541	DS_vs_CTL	RPS21	3.13238e-06	TRUE	vRG	0.697823	0.464168
4.95052e-07	-0.470697	0.053	0.1	0.0131718	DS_vs_CTL	SEC61A1	3.1344e-06	TRUE	vRG	0.320324	0.230887
4.95746e-07	-0.0270367	0.099	0.137	0.0131903	DS_vs_CTL	TP53BP2	3.1355e-06	FALSE	vRG	0.466892	0.45823
4.95925e-07	-0.286977	0.147	0.212	0.0131951	DS_vs_CTL	ZNF512	3.1355e-06	TRUE	vRG	0.810879	0.664449
5.01954e-07	0.00680207	0.254	0.298	0.0133555	DS_vs_CTL	DYNC1LI2	3.17139e-06	FALSE	vRG	1.17968	1.18529
5.04535e-07	-0.263779	0.026	0.059	0.0134242	DS_vs_CTL	AC027601.6	3.184e-06	TRUE	vRG	0.11671	0.0970603
5.04715e-07	-0.196381	0.179	0.244	0.013429	DS_vs_CTL	PPP4R3A	3.184e-06	FALSE	vRG	0.996593	0.869657
5.05235e-07	-0.392727	0.049	0.089	0.0134428	DS_vs_CTL	ZNF675	3.184e-06	TRUE	vRG	0.294066	0.223764
5.05369e-07	0.946076	0.152	0.103	0.0134463	DS_vs_CTL	PAUPAR	3.184e-06	TRUE	vRG	0.491394	0.947718
5.06808e-07	0.0488297	0.465	0.521	0.0134846	DS_vs_CTL	PTPRA	3.19083e-06	FALSE	vRG	2.82039	2.91754
5.08233e-07	-0.204986	0.265	0.352	0.0135226	DS_vs_CTL	TPST1	3.19563e-06	FALSE	vRG	1.9193	1.66497
5.08282e-07	0.512623	0.076	0.082	0.0135239	DS_vs_CTL	THAP12	3.19563e-06	TRUE	vRG	0.272326	0.388979
5.10119e-07	-0.76567	0.04	0.09	0.0135727	DS_vs_CTL	TMED9	3.20493e-06	TRUE	vRG	0.313081	0.183746
5.162e-07	-0.423168	0.074	0.127	0.0137345	DS_vs_CTL	NBPF1	3.24087e-06	TRUE	vRG	0.42341	0.315534
5.19481e-07	0.101621	0.186	0.22	0.0138218	DS_vs_CTL	SLC6A1	3.25919e-06	FALSE	vRG	0.921794	0.989165
5.23483e-07	0.0615455	0.129	0.163	0.0139283	DS_vs_CTL	VPS51	3.282e-06	FALSE	vRG	0.575562	0.600718
5.25402e-07	-0.384745	0.04	0.081	0.0139794	DS_vs_CTL	ECHS1	3.29174e-06	TRUE	vRG	0.212595	0.162612
5.25955e-07	-0.323565	0.046	0.087	0.0139941	DS_vs_CTL	BCAP31	3.2929e-06	TRUE	vRG	0.290926	0.232294
5.29786e-07	0.372395	0.243	0.239	0.014096	DS_vs_CTL	WDR47	3.31458e-06	TRUE	vRG	0.938958	1.21581
5.33021e-07	0.265373	0.214	0.226	0.0141821	DS_vs_CTL	DOP1A	3.33249e-06	TRUE	vRG	0.888728	1.06844
5.46066e-07	0.344229	0.389	0.391	0.0145292	DS_vs_CTL	TFAP2C	3.41168e-06	TRUE	vRG	2.26653	2.8776
5.4782e-07	-0.0205018	0.15	0.192	0.0145759	DS_vs_CTL	LTBP3	3.42026e-06	FALSE	vRG	0.723237	0.713042
5.50304e-07	0.132767	0.297	0.317	0.0146419	DS_vs_CTL	RAB7A	3.43337e-06	FALSE	vRG	1.43178	1.56992
5.51233e-07	0.102365	0.357	0.404	0.0146666	DS_vs_CTL	DENND4C	3.43678e-06	FALSE	vRG	1.89228	2.03153
5.52102e-07	0.345802	0.051	0.066	0.0146898	DS_vs_CTL	CAPN15	3.43847e-06	TRUE	vRG	0.164095	0.208847
5.52435e-07	0.471516	0.083	0.094	0.0146986	DS_vs_CTL	POLDIP3	3.43847e-06	TRUE	vRG	0.292841	0.40647
5.52652e-07	-0.209716	0.169	0.233	0.0147044	DS_vs_CTL	ANP32A	3.43847e-06	FALSE	vRG	0.895599	0.774316
5.56639e-07	0.261971	0.266	0.279	0.0148105	DS_vs_CTL	SLC30A9	3.46087e-06	TRUE	vRG	1.24436	1.49236
5.58968e-07	0.389947	0.147	0.154	0.0148725	DS_vs_CTL	ZNF141	3.47295e-06	TRUE	vRG	0.584886	0.76675
5.61307e-07	-0.321002	0.109	0.167	0.0149347	DS_vs_CTL	DCAF16	3.48418e-06	TRUE	vRG	0.593538	0.474953
5.61552e-07	-0.0563809	0.131	0.176	0.0149412	DS_vs_CTL	HSPA9	3.48418e-06	FALSE	vRG	0.655084	0.629962
5.66446e-07	-0.268164	0.219	0.305	0.0150714	DS_vs_CTL	TBCA	3.51212e-06	TRUE	vRG	1.29087	1.07176
5.67583e-07	-0.742401	0.076	0.143	0.0151017	DS_vs_CTL	SDCBP	3.51674e-06	TRUE	vRG	0.535696	0.319817
5.69044e-07	-0.0917318	0.034	0.073	0.0151406	DS_vs_CTL	SPSB3	3.52336e-06	FALSE	vRG	0.120168	0.112726
5.72004e-07	-0.167088	0.143	0.2	0.0152193	DS_vs_CTL	USP4	3.53925e-06	FALSE	vRG	0.748915	0.666924
5.72827e-07	-0.0199696	0.184	0.23	0.0152412	DS_vs_CTL	LMBRD1	3.5419e-06	FALSE	vRG	0.986643	0.973091
5.759e-07	-0.0568483	0.144	0.195	0.015323	DS_vs_CTL	ZNF708	3.55845e-06	FALSE	vRG	0.749629	0.72065
5.77083e-07	0.510835	0.11	0.115	0.0153544	DS_vs_CTL	KIN	3.56331e-06	TRUE	vRG	0.394674	0.562827
5.78537e-07	0.341563	0.108	0.119	0.0153931	DS_vs_CTL	WDR75	3.56983e-06	TRUE	vRG	0.409463	0.519144
5.80671e-07	0.153662	0.369	0.394	0.0154499	DS_vs_CTL	FAM135A	3.58054e-06	FALSE	vRG	1.95861	2.17888
5.8152e-07	-0.178458	0.422	0.522	0.0154725	DS_vs_CTL	ZMYM4	3.58331e-06	FALSE	vRG	2.9384	2.59641
5.82109e-07	0.0648958	0.305	0.349	0.0154882	DS_vs_CTL	EZH2	3.58448e-06	FALSE	vRG	1.52611	1.5964
5.82825e-07	-0.0265237	0.176	0.221	0.0155072	DS_vs_CTL	USP10	3.58643e-06	FALSE	vRG	0.891905	0.875664
5.8379e-07	-1.12007	0.037	0.095	0.0155329	DS_vs_CTL	MEG8	3.58991e-06	TRUE	vRG	0.512966	0.235466
5.86556e-07	-0.631169	0.075	0.138	0.0156065	DS_vs_CTL	ENDOV	3.60445e-06	TRUE	vRG	0.506752	0.326843
5.87334e-07	0.318124	0.483	0.468	0.0156272	DS_vs_CTL	LINC00632	3.60676e-06	TRUE	vRG	2.49893	3.11571
5.89947e-07	0.0576739	0.135	0.172	0.0156967	DS_vs_CTL	VIRMA	3.62033e-06	FALSE	vRG	0.635266	0.661244
5.96469e-07	-0.0877593	0.237	0.299	0.0158702	DS_vs_CTL	IFT81	3.65536e-06	FALSE	vRG	1.38029	1.2988
5.96641e-07	0.37102	0.223	0.225	0.0158748	DS_vs_CTL	SERP1	3.65536e-06	TRUE	vRG	0.932878	1.20679
5.96877e-07	-0.00294899	0.245	0.3	0.0158811	DS_vs_CTL	SPG11	3.65536e-06	FALSE	vRG	1.32001	1.31734
5.98278e-07	-0.138969	0.499	0.6	0.0159184	DS_vs_CTL	OPHN1	3.66145e-06	FALSE	vRG	4.16206	3.77978
6.01709e-07	0.227385	0.099	0.12	0.0160097	DS_vs_CTL	MLF2	3.67993e-06	FALSE	vRG	0.340221	0.398502
6.02671e-07	2.44333	0.054	0.021	0.0160353	DS_vs_CTL	AC096570.1	3.68331e-06	TRUE	vRG	0.172817	0.944578
6.05943e-07	-0.408553	0.14	0.213	0.0161223	DS_vs_CTL	AC090825.1	3.70079e-06	TRUE	vRG	1.11003	0.836039
6.06356e-07	0.0212713	0.105	0.139	0.0161333	DS_vs_CTL	PRPF38B	3.70079e-06	FALSE	vRG	0.480525	0.487703
6.06802e-07	-1.51192	0.023	0.073	0.0161452	DS_vs_CTL	C4orf3	3.701e-06	TRUE	vRG	0.27835	0.0969535
6.07604e-07	0.30936	0.114	0.131	0.0161665	DS_vs_CTL	PDE1C	3.70337e-06	TRUE	vRG	0.424255	0.525992
6.08881e-07	-1.18417	0.069	0.073	0.0162005	DS_vs_CTL	AC008591.1	3.70864e-06	TRUE	vRG	0.609656	0.267739
6.09701e-07	-0.860513	0.033	0.083	0.0162223	DS_vs_CTL	CDKN1B	3.71112e-06	TRUE	vRG	0.251862	0.138274
6.11638e-07	-0.0488788	0.043	0.07	0.0162738	DS_vs_CTL	TMEM237	3.72038e-06	FALSE	vRG	0.206295	0.199413
6.12739e-07	-0.145335	0.311	0.392	0.0163032	DS_vs_CTL	UBE2E1	3.72456e-06	FALSE	vRG	1.9965	1.8051
6.19113e-07	-0.674072	0.064	0.123	0.0164727	DS_vs_CTL	COX5B	3.76076e-06	TRUE	vRG	0.447531	0.280122
6.24444e-07	-0.379358	0.239	0.342	0.0166146	DS_vs_CTL	PABPN1	3.79058e-06	TRUE	vRG	1.25959	0.968132
6.25802e-07	-0.180094	0.31	0.389	0.0166507	DS_vs_CTL	CTNNB1	3.79625e-06	FALSE	vRG	1.86876	1.64936
6.26325e-07	-0.197293	0.143	0.201	0.0166646	DS_vs_CTL	MBTPS1	3.79686e-06	FALSE	vRG	0.751395	0.655248
6.29422e-07	0.0505117	0.45	0.512	0.016747	DS_vs_CTL	COP1	3.81246e-06	FALSE	vRG	2.744	2.84183
6.29748e-07	-0.0697785	0.146	0.189	0.0167557	DS_vs_CTL	RDH11	3.81246e-06	FALSE	vRG	0.689935	0.657336
6.31135e-07	-0.241361	0.175	0.245	0.0167926	DS_vs_CTL	RAC1	3.81828e-06	FALSE	vRG	1.00049	0.846226
6.32852e-07	0.440104	0.091	0.099	0.0168383	DS_vs_CTL	ZNF410	3.82609e-06	TRUE	vRG	0.327673	0.44495
6.37689e-07	0.313956	0.131	0.14	0.016967	DS_vs_CTL	TPP2	3.85166e-06	TRUE	vRG	0.500682	0.622682
6.37939e-07	0.174493	0.19	0.216	0.0169737	DS_vs_CTL	NVL	3.85166e-06	FALSE	vRG	0.914359	1.03208
6.44371e-07	0.116881	0.069	0.093	0.0171448	DS_vs_CTL	BLMH	3.88788e-06	FALSE	vRG	0.307212	0.333249
6.47366e-07	-0.935798	0.019	0.056	0.0172245	DS_vs_CTL	CSTF2	3.90332e-06	TRUE	vRG	0.203511	0.105916
6.49967e-07	0.284087	0.076	0.09	0.0172937	DS_vs_CTL	EXOSC3	3.91638e-06	TRUE	vRG	0.269024	0.327825
6.54592e-07	-0.00647709	0.171	0.216	0.0174167	DS_vs_CTL	ARHGEF10L	3.9416e-06	FALSE	vRG	0.786938	0.783433
6.57359e-07	-0.32172	0.165	0.241	0.0174904	DS_vs_CTL	ZNF431	3.95348e-06	TRUE	vRG	1.07962	0.86364
6.57445e-07	0.0467087	0.175	0.218	0.0174926	DS_vs_CTL	DIDO1	3.95348e-06	FALSE	vRG	0.769201	0.794571
6.61685e-07	-0.288237	0.161	0.228	0.0176054	DS_vs_CTL	PRPF8	3.97561e-06	TRUE	vRG	0.943538	0.772503
6.62012e-07	-0.149262	0.115	0.162	0.0176141	DS_vs_CTL	MOV10	3.97561e-06	FALSE	vRG	0.589576	0.531551
6.62562e-07	-0.163614	0.065	0.106	0.0176288	DS_vs_CTL	GID8	3.97626e-06	FALSE	vRG	0.318995	0.284709
6.64595e-07	-0.375188	0.072	0.12	0.0176829	DS_vs_CTL	TOMM20	3.9858e-06	TRUE	vRG	0.42267	0.325668
6.67015e-07	0.263029	0.231	0.248	0.0177473	DS_vs_CTL	SP3	3.99571e-06	TRUE	vRG	0.999466	1.19959
6.67139e-07	0.356819	0.352	0.338	0.0177506	DS_vs_CTL	ATG7	3.99571e-06	TRUE	vRG	1.71762	2.1999
6.7016e-07	-0.0695087	0.399	0.47	0.017831	DS_vs_CTL	ANKHD1	4.01113e-06	FALSE	vRG	2.44329	2.32834
6.71338e-07	-0.254247	0.344	0.444	0.0178623	DS_vs_CTL	SMCHD1	4.0155e-06	TRUE	vRG	2.23685	1.87529
6.74284e-07	-0.0730488	0.181	0.231	0.0179407	DS_vs_CTL	STT3B	4.03044e-06	FALSE	vRG	0.868564	0.825654
6.76434e-07	-0.163451	0.322	0.415	0.0179979	DS_vs_CTL	RPS4X	4.0406e-06	FALSE	vRG	1.80673	1.61312
6.77142e-07	0.250694	0.239	0.252	0.0180167	DS_vs_CTL	VPS8	4.04214e-06	TRUE	vRG	1.06785	1.27072
6.81366e-07	0.047579	0.157	0.193	0.0181291	DS_vs_CTL	GATAD1	4.06465e-06	FALSE	vRG	0.719841	0.744037
6.82312e-07	0.274592	0.152	0.168	0.0181543	DS_vs_CTL	PLEKHO1	4.0676e-06	TRUE	vRG	0.519665	0.628857
6.84836e-07	-1.04332	0.034	0.087	0.0182214	DS_vs_CTL	DRAP1	4.07953e-06	TRUE	vRG	0.244648	0.118197
6.85223e-07	-0.136358	0.149	0.204	0.0182317	DS_vs_CTL	CCDC88C	4.07953e-06	FALSE	vRG	0.859686	0.782085
6.85698e-07	0.0701327	0.293	0.338	0.0182444	DS_vs_CTL	OSBPL8	4.07965e-06	FALSE	vRG	1.50729	1.58245
6.88542e-07	-0.227369	0.189	0.266	0.01832	DS_vs_CTL	SUGP2	4.09218e-06	FALSE	vRG	0.90868	0.77606
6.88715e-07	0.873681	0.183	0.127	0.0183246	DS_vs_CTL	IFNGR2	4.09218e-06	TRUE	vRG	0.505015	0.926243
6.90209e-07	0.289615	0.384	0.389	0.0183644	DS_vs_CTL	RASA1	4.09584e-06	TRUE	vRG	1.81672	2.22086
6.90244e-07	1.63766	0.088	0.032	0.0183653	DS_vs_CTL	TCF4-AS1	4.09584e-06	TRUE	vRG	0.111865	0.350296
6.90922e-07	0.167089	0.193	0.232	0.0183834	DS_vs_CTL	CSNK1E	4.09716e-06	FALSE	vRG	0.762838	0.85666
6.92514e-07	0.296737	0.447	0.439	0.0184257	DS_vs_CTL	PAXBP1	4.10389e-06	TRUE	vRG	2.11387	2.59686
6.94997e-07	0.0110989	0.216	0.271	0.0184918	DS_vs_CTL	CCNL2	4.11515e-06	FALSE	vRG	0.803407	0.809645
6.95331e-07	0.0636517	0.076	0.109	0.0185007	DS_vs_CTL	ZNF133	4.11515e-06	FALSE	vRG	0.325175	0.339915
6.97156e-07	-0.0259956	0.326	0.386	0.0185492	DS_vs_CTL	TENT2	4.12323e-06	FALSE	vRG	1.8208	1.78829
7.01787e-07	-0.264248	0.224	0.308	0.0186724	DS_vs_CTL	PDCD6IP	4.14789e-06	TRUE	vRG	1.30324	1.08497
7.03115e-07	-0.152537	0.169	0.229	0.0187078	DS_vs_CTL	HIVEP1	4.15301e-06	FALSE	vRG	0.95572	0.859751
7.04896e-07	-0.608196	0.021	0.057	0.0187552	DS_vs_CTL	CSF1	4.16078e-06	TRUE	vRG	0.196878	0.128823
7.06441e-07	0.0682152	0.082	0.111	0.0187963	DS_vs_CTL	HMGXB3	4.16717e-06	FALSE	vRG	0.379042	0.39747
7.06995e-07	0.356958	0.111	0.12	0.018811	DS_vs_CTL	NBPF26	4.1677e-06	TRUE	vRG	0.399204	0.511586
7.11922e-07	-0.31093	0.26	0.355	0.0189421	DS_vs_CTL	TLK2	4.19243e-06	TRUE	vRG	1.7393	1.40192
7.12192e-07	-0.273906	0.122	0.182	0.0189493	DS_vs_CTL	SMARCC2	4.19243e-06	TRUE	vRG	0.688727	0.569476
7.12592e-07	0.382688	0.582	0.513	0.0189599	DS_vs_CTL	EPB41L4A	4.19243e-06	TRUE	vRG	3.45146	4.50024
7.16151e-07	-0.0743964	0.61	0.706	0.0190546	DS_vs_CTL	CERS6	4.21061e-06	FALSE	vRG	5.24779	4.98401
7.17191e-07	0.0624302	0.206	0.243	0.0190823	DS_vs_CTL	INTS6	4.21397e-06	FALSE	vRG	1.10441	1.15332
7.18072e-07	-0.101484	0.134	0.179	0.0191058	DS_vs_CTL	METAP2	4.21639e-06	FALSE	vRG	0.690961	0.643982
7.18713e-07	0.842765	0.206	0.145	0.0191228	DS_vs_CTL	IL3RA	4.21739e-06	TRUE	vRG	0.606437	1.08848
7.22739e-07	0.323873	0.184	0.187	0.0192299	DS_vs_CTL	ARIH2	4.23824e-06	TRUE	vRG	0.681621	0.853462
7.24538e-07	0.268849	0.162	0.183	0.0192778	DS_vs_CTL	EXT2	4.24602e-06	TRUE	vRG	0.647558	0.780446
7.26719e-07	-0.616156	0.068	0.126	0.0193358	DS_vs_CTL	ATP1B2	4.25446e-06	TRUE	vRG	0.447622	0.291696
7.26926e-07	-0.194538	0.288	0.374	0.0193413	DS_vs_CTL	UBE2D3	4.25446e-06	FALSE	vRG	1.7011	1.4864
7.33582e-07	-0.350181	0.161	0.237	0.0195184	DS_vs_CTL	MTCL1	4.29062e-06	TRUE	vRG	1.01746	0.797987
7.48186e-07	0.695598	0.16	0.127	0.019907	DS_vs_CTL	TRAPPC10	4.37057e-06	TRUE	vRG	0.491191	0.79618
7.48226e-07	0.336004	0.232	0.234	0.019908	DS_vs_CTL	CYFIP2	4.37057e-06	TRUE	vRG	0.859501	1.08521
7.50163e-07	-0.103698	0.216	0.275	0.0199596	DS_vs_CTL	DKK3	4.37904e-06	FALSE	vRG	1.16093	1.08037
7.59812e-07	0.193155	0.147	0.166	0.0202163	DS_vs_CTL	NPHP1	4.43249e-06	FALSE	vRG	0.677294	0.774498
7.61635e-07	-0.144421	0.316	0.395	0.0202648	DS_vs_CTL	NINL	4.44023e-06	FALSE	vRG	1.81941	1.64602
7.62312e-07	0.0129053	0.111	0.147	0.0202828	DS_vs_CTL	POLR1A	4.4413e-06	FALSE	vRG	0.547212	0.552163
7.64583e-07	-0.365735	0.103	0.165	0.0203433	DS_vs_CTL	ABCD4	4.45164e-06	TRUE	vRG	0.597904	0.46381
7.73695e-07	0.0185376	0.259	0.31	0.0205857	DS_vs_CTL	SNX29	4.50177e-06	FALSE	vRG	1.39868	1.41681
7.79884e-07	0.511084	0.137	0.136	0.0207504	DS_vs_CTL	ZNF506	4.53484e-06	TRUE	vRG	0.445567	0.635452
7.8309e-07	0.0059243	0.241	0.288	0.0208357	DS_vs_CTL	EXOC7	4.55054e-06	FALSE	vRG	1.09938	1.10394
7.90855e-07	1.23886	0.093	0.056	0.0210423	DS_vs_CTL	ZBTB20-AS1	4.59269e-06	TRUE	vRG	0.193709	0.458611
7.96033e-07	0.0572647	0.488	0.551	0.0211801	DS_vs_CTL	FRYL	4.61977e-06	FALSE	vRG	2.98256	3.1034
7.97426e-07	-0.402096	0.031	0.073	0.0212171	DS_vs_CTL	RRAGA	4.62486e-06	TRUE	vRG	0.199484	0.150734
7.98093e-07	0.0209223	0.426	0.491	0.0212349	DS_vs_CTL	TMCC1	4.62575e-06	FALSE	vRG	2.76603	2.80648
8.01676e-07	0.169457	0.046	0.072	0.0213302	DS_vs_CTL	REC8	4.64352e-06	FALSE	vRG	0.122165	0.137545
8.02386e-07	-0.361377	0.08	0.133	0.0213491	DS_vs_CTL	ALG5	4.64463e-06	TRUE	vRG	0.470745	0.366233
8.06175e-07	0.504287	0.132	0.13	0.0214499	DS_vs_CTL	TTC23	4.66355e-06	TRUE	vRG	0.475896	0.67548
8.19424e-07	-0.732828	0.037	0.084	0.0218024	DS_vs_CTL	EMD	4.73715e-06	TRUE	vRG	0.223943	0.134364
8.22142e-07	0.341509	0.181	0.19	0.0218747	DS_vs_CTL	EIF2AK4	4.7498e-06	TRUE	vRG	0.738388	0.935899
8.2372e-07	-0.237688	0.644	0.753	0.0219167	DS_vs_CTL	TOX	4.75339e-06	FALSE	vRG	7.52685	6.38341
8.23822e-07	-0.0416383	0.237	0.289	0.0219194	DS_vs_CTL	URI1	4.75339e-06	FALSE	vRG	1.22363	1.18882
8.27398e-07	0.190537	0.191	0.216	0.0220146	DS_vs_CTL	DNM1	4.77095e-06	FALSE	vRG	0.789068	0.900647
8.28225e-07	-0.0517212	0.296	0.363	0.0220366	DS_vs_CTL	CALM2	4.77266e-06	FALSE	vRG	1.41871	1.36874
8.32024e-07	0.180815	0.246	0.268	0.0221377	DS_vs_CTL	SEMA6A	4.79148e-06	FALSE	vRG	1.19275	1.35217
8.34332e-07	0.17867	0.195	0.218	0.0221991	DS_vs_CTL	UBN2	4.80169e-06	FALSE	vRG	0.849017	0.961113
8.37714e-07	-0.237162	0.116	0.165	0.0222891	DS_vs_CTL	BBS2	4.81806e-06	FALSE	vRG	0.634959	0.538576
8.43637e-07	-0.150083	0.501	0.6	0.0224466	DS_vs_CTL	PCM1	4.84902e-06	FALSE	vRG	3.54565	3.19525
8.47495e-07	-0.104211	0.365	0.439	0.0225493	DS_vs_CTL	SCRN1	4.86752e-06	FALSE	vRG	2.25712	2.09978
8.4794e-07	0.127937	0.24	0.272	0.0225611	DS_vs_CTL	FBXL5	4.86752e-06	FALSE	vRG	1.15287	1.2599
8.50206e-07	-0.238837	0.102	0.155	0.0226214	DS_vs_CTL	ANAPC1	4.87741e-06	FALSE	vRG	0.598565	0.507108
8.51346e-07	0.0942406	0.091	0.118	0.0226518	DS_vs_CTL	NLGN2	4.88083e-06	FALSE	vRG	0.336723	0.359549
8.53978e-07	1.05285	0.185	0.109	0.0227218	DS_vs_CTL	STARD4-AS1	4.89154e-06	TRUE	vRG	0.397277	0.82534
8.54302e-07	-0.0833386	0.24	0.302	0.0227304	DS_vs_CTL	ARID4A	4.89154e-06	FALSE	vRG	1.27857	1.20677
8.5595e-07	-0.6223	0.047	0.096	0.0227743	DS_vs_CTL	GCSH	4.89785e-06	TRUE	vRG	0.345995	0.224432
8.57722e-07	-0.0943238	0.241	0.304	0.0228214	DS_vs_CTL	NBEAL1	4.90486e-06	FALSE	vRG	1.39012	1.3021
8.61627e-07	0.182706	0.545	0.573	0.0229253	DS_vs_CTL	ANKFN1	4.92101e-06	FALSE	vRG	3.97057	4.50681
8.61642e-07	-1.36071	0.019	0.063	0.0229257	DS_vs_CTL	LRATD1	4.92101e-06	TRUE	vRG	0.219123	0.0847165
8.68098e-07	0.149235	0.284	0.316	0.0230975	DS_vs_CTL	SLC25A12	4.95473e-06	FALSE	vRG	1.44729	1.60516
8.69498e-07	-0.603133	0.111	0.19	0.0231347	DS_vs_CTL	SLC39A6	4.95956e-06	TRUE	vRG	0.775606	0.51027
8.71704e-07	-0.586727	0.13	0.217	0.0231934	DS_vs_CTL	CD24	4.96899e-06	TRUE	vRG	0.705017	0.469115
8.77342e-07	-0.0422039	0.172	0.221	0.0233435	DS_vs_CTL	ZC3H15	4.99796e-06	FALSE	vRG	0.903781	0.877721
8.79521e-07	-0.400458	0.054	0.098	0.0234014	DS_vs_CTL	SSRP1	5.00719e-06	TRUE	vRG	0.34068	0.257879
8.85713e-07	0.378455	0.221	0.211	0.0235662	DS_vs_CTL	CDC42BPB	5.03925e-06	TRUE	vRG	0.813097	1.05732
8.8946e-07	-0.0837925	0.298	0.367	0.0236658	DS_vs_CTL	LMNA	5.05736e-06	FALSE	vRG	1.69531	1.59962
8.91045e-07	0.0879423	0.106	0.139	0.023708	DS_vs_CTL	TMCO1	5.06317e-06	FALSE	vRG	0.487684	0.518427
8.92921e-07	-0.266084	0.111	0.167	0.0237579	DS_vs_CTL	TPGS2	5.07061e-06	TRUE	vRG	0.623376	0.518234
8.96039e-07	-0.424302	0.224	0.321	0.0238409	DS_vs_CTL	HNRNPA1	5.08511e-06	TRUE	vRG	1.21104	0.902226
8.97116e-07	0.215162	0.115	0.135	0.0238696	DS_vs_CTL	CARD8	5.088e-06	FALSE	vRG	0.478685	0.555865
9.17319e-07	-1.08922	0.023	0.066	0.0244071	DS_vs_CTL	TP53I13	5.19778e-06	TRUE	vRG	0.210762	0.0985368
9.17711e-07	-0.213172	0.09	0.14	0.0244175	DS_vs_CTL	RNASEK	5.19778e-06	FALSE	vRG	0.444069	0.382953
9.1825e-07	-0.495189	0.072	0.128	0.0244319	DS_vs_CTL	RBM12B	5.19778e-06	TRUE	vRG	0.411119	0.2914
9.18789e-07	-0.137756	0.038	0.074	0.0244462	DS_vs_CTL	CRIP2	5.19778e-06	FALSE	vRG	0.135447	0.123043
9.20199e-07	0.623794	0.319	0.271	0.0244837	DS_vs_CTL	DLEU1	5.20249e-06	TRUE	vRG	1.60481	2.47348
9.20815e-07	0.0454527	0.179	0.219	0.0245001	DS_vs_CTL	SPPL2A	5.20269e-06	FALSE	vRG	0.921704	0.951264
9.22878e-07	-0.512705	0.117	0.191	0.024555	DS_vs_CTL	TSPAN18	5.21107e-06	TRUE	vRG	0.783421	0.54882
9.28499e-07	-0.0334108	0.238	0.297	0.0247046	DS_vs_CTL	TOGARAM1	5.23849e-06	FALSE	vRG	1.25871	1.22989
9.28901e-07	-0.306306	0.288	0.384	0.0247153	DS_vs_CTL	FZD3	5.23849e-06	TRUE	vRG	1.93712	1.56639
9.35555e-07	-0.0537107	0.308	0.376	0.0248923	DS_vs_CTL	ELAVL3	5.2727e-06	FALSE	vRG	1.668	1.60703
9.36552e-07	-0.95546	0.198	0.29	0.0249188	DS_vs_CTL	PID1	5.27501e-06	TRUE	vRG	2.19579	1.13184
9.40077e-07	-0.54694	0.096	0.164	0.0250126	DS_vs_CTL	MZT2A	5.29154e-06	TRUE	vRG	0.634416	0.433937
9.41559e-07	-0.075666	0.112	0.156	0.0250521	DS_vs_CTL	ANXA6	5.29656e-06	FALSE	vRG	0.570378	0.541206
9.42412e-07	0.0939342	0.242	0.276	0.0250748	DS_vs_CTL	ZMAT1	5.29804e-06	FALSE	vRG	1.1874	1.26738
9.43761e-07	0.108845	0.202	0.237	0.0251106	DS_vs_CTL	SENP5	5.30231e-06	FALSE	vRG	0.92967	1.00263
9.45073e-07	-0.0333703	0.338	0.404	0.0251456	DS_vs_CTL	TOP1	5.30535e-06	FALSE	vRG	1.89567	1.85233
9.45485e-07	-0.210347	0.186	0.249	0.0251565	DS_vs_CTL	NUP153	5.30535e-06	FALSE	vRG	1.04398	0.902227
9.46663e-07	-0.284723	0.213	0.293	0.0251879	DS_vs_CTL	AC139887.2	5.30865e-06	TRUE	vRG	1.26204	1.03584
9.49005e-07	0.00499287	0.158	0.202	0.0252502	DS_vs_CTL	ATP1B3	5.31846e-06	FALSE	vRG	0.721464	0.723994
9.50678e-07	-0.451771	0.078	0.133	0.0252947	DS_vs_CTL	RAB22A	5.32263e-06	TRUE	vRG	0.524803	0.383454
9.51207e-07	-0.470355	0.064	0.116	0.0253088	DS_vs_CTL	MAGT1	5.32263e-06	TRUE	vRG	0.44237	0.319034
9.51734e-07	-0.25248	0.047	0.084	0.0253228	DS_vs_CTL	BAG6	5.32263e-06	TRUE	vRG	0.227565	0.190888
9.52122e-07	-0.165585	0.119	0.171	0.0253331	DS_vs_CTL	SLC16A9	5.32263e-06	FALSE	vRG	0.665084	0.592879
9.55766e-07	0.275172	0.396	0.394	0.0254301	DS_vs_CTL	CDC42BPA	5.33968e-06	TRUE	vRG	1.8332	2.21867
9.60256e-07	0.135382	0.199	0.227	0.0255495	DS_vs_CTL	MIR3936HG	5.36084e-06	FALSE	vRG	0.902086	0.990964
9.60747e-07	-0.00966088	0.202	0.252	0.0255626	DS_vs_CTL	SESN3	5.36084e-06	FALSE	vRG	1.07806	1.07088
9.66455e-07	0.124955	0.152	0.182	0.0257145	DS_vs_CTL	ZNF529	5.38934e-06	FALSE	vRG	0.673712	0.734784
9.729e-07	-0.384188	0.056	0.101	0.025886	DS_vs_CTL	NUDCD2	5.42191e-06	TRUE	vRG	0.310431	0.237638
9.75192e-07	0.00548158	0.338	0.394	0.0259469	DS_vs_CTL	CCSER2	5.43131e-06	FALSE	vRG	1.79289	1.79975
9.80182e-07	-0.268309	0.028	0.062	0.0260797	DS_vs_CTL	DCXR	5.45572e-06	TRUE	vRG	0.127573	0.105772
9.81047e-07	0.0873017	0.155	0.184	0.0261027	DS_vs_CTL	AIF1L	5.45715e-06	FALSE	vRG	0.736065	0.782072
9.83256e-07	0.274309	0.868	0.843	0.0261615	DS_vs_CTL	DOK5	5.46605e-06	TRUE	vRG	11.2339	13.5867
9.90208e-07	0.585612	0.103	0.096	0.0263465	DS_vs_CTL	NSUN2	5.50129e-06	TRUE	vRG	0.278746	0.418852
9.92318e-07	-0.209725	0.106	0.158	0.0264026	DS_vs_CTL	ACAD11	5.50888e-06	FALSE	vRG	0.574484	0.496642
9.92992e-07	1.97644	0.067	0.03	0.0264205	DS_vs_CTL	MROH9	5.50888e-06	TRUE	vRG	0.108324	0.429347
9.93414e-07	-0.216859	0.152	0.211	0.0264318	DS_vs_CTL	SYNCRIP	5.50888e-06	FALSE	vRG	0.807716	0.694869
9.95892e-07	-0.743594	0.03	0.072	0.0264977	DS_vs_CTL	DNTTIP1	5.51921e-06	TRUE	vRG	0.247727	0.147562
1.00094e-06	-0.434792	0.276	0.387	0.026632	DS_vs_CTL	SLC22A23	5.54376e-06	TRUE	vRG	2.00528	1.48326
1.00204e-06	0.522954	0.26	0.246	0.0266612	DS_vs_CTL	SLC1A2	5.54642e-06	TRUE	vRG	1.17021	1.68195
1.0027e-06	0.183948	0.189	0.212	0.0266787	DS_vs_CTL	FAF2	5.54664e-06	FALSE	vRG	0.871144	0.989775
1.00419e-06	0.722125	0.138	0.129	0.0267185	DS_vs_CTL	KCTD16	5.55149e-06	TRUE	vRG	0.517022	0.853583
1.00526e-06	0.0590357	0.398	0.446	0.026747	DS_vs_CTL	HDAC8	5.554e-06	FALSE	vRG	2.44524	2.54745
1.01274e-06	-0.141382	0.692	0.79	0.026946	DS_vs_CTL	CHD9	5.59187e-06	FALSE	vRG	6.37236	5.77743
1.02405e-06	0.316368	0.056	0.072	0.027247	DS_vs_CTL	HEPN1	5.65087e-06	TRUE	vRG	0.24967	0.311166
1.02713e-06	0.0668452	0.56	0.616	0.0273288	DS_vs_CTL	UBR5	5.66435e-06	FALSE	vRG	3.75093	3.92889
1.04272e-06	-0.327317	0.196	0.277	0.0277435	DS_vs_CTL	BAZ1B	5.74678e-06	TRUE	vRG	1.22192	0.973709
1.04599e-06	-0.235805	0.273	0.357	0.0278308	DS_vs_CTL	SMAD4	5.76131e-06	FALSE	vRG	1.70338	1.4464
1.0492e-06	-0.0983194	0.464	0.552	0.0279161	DS_vs_CTL	LRP6	5.77543e-06	FALSE	vRG	3.28007	3.06394
1.05527e-06	-0.168276	0.15	0.204	0.0280776	DS_vs_CTL	ZNF248	5.80528e-06	FALSE	vRG	0.785335	0.698784
1.05805e-06	0.15913	0.2	0.228	0.0281516	DS_vs_CTL	YME1L1	5.81703e-06	FALSE	vRG	0.878698	0.981313
1.05956e-06	0.0869759	0.183	0.221	0.0281917	DS_vs_CTL	PIK3CA	5.82174e-06	FALSE	vRG	0.918698	0.975877
1.06277e-06	-0.0250592	0.085	0.119	0.0282771	DS_vs_CTL	TSNAX	5.83581e-06	FALSE	vRG	0.402144	0.395226
1.07161e-06	-0.363134	0.062	0.107	0.0285124	DS_vs_CTL	PURA	5.88076e-06	TRUE	vRG	0.356237	0.27676
1.07691e-06	-0.356728	0.244	0.339	0.0286532	DS_vs_CTL	DNER	5.90621e-06	TRUE	vRG	1.62691	1.27031
1.07851e-06	-0.227234	0.078	0.121	0.0286959	DS_vs_CTL	RASA3	5.9114e-06	FALSE	vRG	0.451368	0.385465
1.08547e-06	0.204594	0.648	0.656	0.0288812	DS_vs_CTL	MBD5	5.94593e-06	FALSE	vRG	4.73983	5.46218
1.09149e-06	0.0258229	0.104	0.136	0.0290414	DS_vs_CTL	PDHX	5.97526e-06	FALSE	vRG	0.462393	0.470788
1.09556e-06	0.189958	0.597	0.612	0.0291494	DS_vs_CTL	TBL1XR1	5.99384e-06	FALSE	vRG	4.00368	4.56729
1.0989e-06	-0.123256	0.115	0.163	0.0292383	DS_vs_CTL	ACTR2	6.00846e-06	FALSE	vRG	0.649179	0.59596
1.10605e-06	-0.0312393	0.255	0.312	0.0294286	DS_vs_CTL	MBNL1	6.04389e-06	FALSE	vRG	1.57857	1.54476
1.10812e-06	0.225526	0.177	0.197	0.0294838	DS_vs_CTL	GOPC	6.05154e-06	FALSE	vRG	0.768075	0.898237
1.11073e-06	-0.128577	0.196	0.257	0.0295531	DS_vs_CTL	KATNAL1	6.06208e-06	FALSE	vRG	1.04288	0.953895
1.11203e-06	0.26063	0.381	0.386	0.0295879	DS_vs_CTL	HECTD1	6.06552e-06	TRUE	vRG	1.83799	2.20215
1.11768e-06	0.436455	0.606	0.525	0.029738	DS_vs_CTL	FRMD5	6.09259e-06	TRUE	vRG	4.35033	5.88758
1.11996e-06	-0.130462	0.215	0.274	0.0297988	DS_vs_CTL	CDK12	6.10133e-06	FALSE	vRG	1.11648	1.01988
1.12077e-06	0.25681	0.894	0.876	0.0298203	DS_vs_CTL	TRIM2	6.10204e-06	TRUE	vRG	10.3241	12.3358
1.12156e-06	-0.0656714	0.36	0.437	0.0298415	DS_vs_CTL	SRSF5	6.10267e-06	FALSE	vRG	1.76228	1.68384
1.12876e-06	0.0681519	0.168	0.201	0.0300329	DS_vs_CTL	EZH1	6.1381e-06	FALSE	vRG	0.804895	0.843905
1.13077e-06	-0.0274765	0.179	0.227	0.0300863	DS_vs_CTL	RNF145	6.14529e-06	FALSE	vRG	0.885396	0.868699
1.13804e-06	-0.349173	0.183	0.271	0.0302797	DS_vs_CTL	RPS16	6.18106e-06	TRUE	vRG	1.08818	0.85406
1.14094e-06	0.0224383	0.263	0.318	0.030357	DS_vs_CTL	NEK1	6.19308e-06	FALSE	vRG	1.46942	1.4925
1.1436e-06	0.0845919	0.177	0.218	0.0304278	DS_vs_CTL	SMG7	6.20062e-06	FALSE	vRG	0.900985	0.955481
1.14371e-06	-0.931715	0.037	0.09	0.0304307	DS_vs_CTL	TRIM28	6.20062e-06	TRUE	vRG	0.25106	0.131146
1.15724e-06	-0.0849448	0.219	0.274	0.0307908	DS_vs_CTL	IBTK	6.26746e-06	FALSE	vRG	1.20049	1.13181
1.15743e-06	0.16943	0.323	0.357	0.0307958	DS_vs_CTL	PPP2R5E	6.26746e-06	FALSE	vRG	1.60248	1.80232
1.15851e-06	-0.0846486	0.105	0.146	0.0308245	DS_vs_CTL	CTDSP2	6.26951e-06	FALSE	vRG	0.490526	0.462539
1.16049e-06	-0.270058	0.116	0.176	0.0308771	DS_vs_CTL	ESD	6.27643e-06	TRUE	vRG	0.630035	0.522327
1.16816e-06	-0.593679	0.078	0.14	0.0310812	DS_vs_CTL	SREBF1	6.31055e-06	TRUE	vRG	0.49219	0.325825
1.16955e-06	0.191913	0.422	0.441	0.0311183	DS_vs_CTL	ITCH	6.31055e-06	FALSE	vRG	2.21248	2.52744
1.1697e-06	-0.0131967	0.114	0.155	0.0311223	DS_vs_CTL	DSE	6.31055e-06	FALSE	vRG	0.592569	0.587189
1.17012e-06	-0.366972	0.058	0.101	0.0311334	DS_vs_CTL	ELOC	6.31055e-06	TRUE	vRG	0.34604	0.268114
1.17031e-06	0.372058	0.196	0.2	0.0311385	DS_vs_CTL	GNPTAB	6.31055e-06	TRUE	vRG	0.722623	0.935548
1.17194e-06	-0.251138	0.095	0.142	0.0311818	DS_vs_CTL	PHF6	6.31553e-06	TRUE	vRG	0.481701	0.4046
1.17542e-06	1.18638	0.12	0.056	0.0312744	DS_vs_CTL	LINC02315	6.33048e-06	TRUE	vRG	0.410359	0.935246
1.18137e-06	-0.229925	0.155	0.218	0.0314328	DS_vs_CTL	EXOC2	6.35873e-06	FALSE	vRG	0.844188	0.719694
1.18469e-06	1.32708	0.117	0.066	0.0315211	DS_vs_CTL	MEF2C-AS1	6.37278e-06	TRUE	vRG	0.228084	0.573839
1.18618e-06	0.203026	0.196	0.215	0.0315607	DS_vs_CTL	TULP3	6.37695e-06	FALSE	vRG	0.949687	1.09338
1.19179e-06	0.301876	0.136	0.146	0.0317101	DS_vs_CTL	STAM2	6.40331e-06	TRUE	vRG	0.526117	0.648836
1.194e-06	-0.494771	0.146	0.227	0.0317688	DS_vs_CTL	RHOBTB3	6.41133e-06	TRUE	vRG	1.01054	0.716878
1.19502e-06	1.95532	0.058	0.024	0.031796	DS_vs_CTL	SYN2	6.41298e-06	TRUE	vRG	0.0480315	0.189278
1.19705e-06	0.145867	0.119	0.147	0.0318499	DS_vs_CTL	LANCL1	6.42001e-06	FALSE	vRG	0.524098	0.579995
1.19883e-06	0.602903	0.103	0.094	0.0318972	DS_vs_CTL	C5orf56	6.42572e-06	TRUE	vRG	0.315088	0.47911
1.19972e-06	0.186897	0.169	0.192	0.0319209	DS_vs_CTL	WDR11	6.42666e-06	FALSE	vRG	0.696575	0.793089
1.20193e-06	0.112987	0.225	0.252	0.0319797	DS_vs_CTL	CNTNAP3B	6.43466e-06	FALSE	vRG	1.10095	1.19075
1.20304e-06	-0.628079	0.048	0.095	0.0320093	DS_vs_CTL	ZNF226	6.43677e-06	TRUE	vRG	0.354288	0.228897
1.20462e-06	-0.000561242	0.129	0.161	0.0320514	DS_vs_CTL	BCL7C	6.44139e-06	FALSE	vRG	0.624445	0.624226
1.2064e-06	0.00358347	0.365	0.427	0.0320986	DS_vs_CTL	FBXL20	6.44166e-06	FALSE	vRG	2.3008	2.30655
1.20643e-06	0.159293	0.28	0.304	0.0320995	DS_vs_CTL	ZNF544	6.44166e-06	FALSE	vRG	1.34756	1.50502
1.20682e-06	0.183985	0.472	0.502	0.03211	DS_vs_CTL	ARID2	6.44166e-06	FALSE	vRG	2.77257	3.14986
1.20984e-06	0.0378812	0.189	0.228	0.0321902	DS_vs_CTL	TASOR2	6.44809e-06	FALSE	vRG	0.959928	0.98552
1.20995e-06	0.0632704	0.534	0.585	0.032193	DS_vs_CTL	PUM1	6.44809e-06	FALSE	vRG	3.26026	3.40649
1.21018e-06	-0.269129	0.114	0.173	0.0321994	DS_vs_CTL	ZFP36L2	6.44809e-06	TRUE	vRG	0.881087	0.730993
1.21159e-06	0.310464	0.038	0.059	0.0322369	DS_vs_CTL	RNASEH2C	6.45177e-06	TRUE	vRG	0.109389	0.135928
1.2167e-06	0.221464	0.107	0.122	0.0323728	DS_vs_CTL	EFTUD2	6.47513e-06	FALSE	vRG	0.427822	0.499002
1.2246e-06	-0.251958	0.107	0.161	0.032583	DS_vs_CTL	EIF3L	6.51332e-06	TRUE	vRG	0.604942	0.507863
1.22869e-06	0.0951259	0.464	0.508	0.0326918	DS_vs_CTL	EHMT1	6.5312e-06	FALSE	vRG	2.60358	2.78114
1.2317e-06	-0.224091	0.361	0.461	0.0327718	DS_vs_CTL	FARS2	6.5433e-06	FALSE	vRG	2.60962	2.23406
1.23279e-06	0.0421605	0.268	0.313	0.0328008	DS_vs_CTL	MRTFB	6.54523e-06	FALSE	vRG	1.41571	1.45775
1.23371e-06	-0.992245	0.108	0.192	0.0328253	DS_vs_CTL	MCC	6.54625e-06	TRUE	vRG	1.17562	0.590486
1.23548e-06	0.322512	0.262	0.269	0.0328723	DS_vs_CTL	WDR17	6.55174e-06	TRUE	vRG	1.15964	1.45042
1.23664e-06	-0.871659	0.028	0.071	0.0329034	DS_vs_CTL	AMOT	6.55406e-06	TRUE	vRG	0.273907	0.14925
1.2388e-06	-0.539635	0.076	0.135	0.0329607	DS_vs_CTL	PPP1CC	6.56162e-06	TRUE	vRG	0.481307	0.330814
1.24159e-06	-0.313877	0.058	0.102	0.0330349	DS_vs_CTL	CCT7	6.5725e-06	TRUE	vRG	0.322469	0.259241
1.24568e-06	-0.338225	0.12	0.184	0.0331439	DS_vs_CTL	KLHL42	6.5903e-06	TRUE	vRG	0.73523	0.581385
1.24679e-06	-0.128809	0.137	0.186	0.0331733	DS_vs_CTL	ARL8B	6.59226e-06	FALSE	vRG	0.73029	0.66785
1.24919e-06	-0.17794	0.082	0.122	0.0332372	DS_vs_CTL	TAF4	6.59666e-06	FALSE	vRG	0.385488	0.340662
1.24944e-06	-0.596739	0.338	0.449	0.033244	DS_vs_CTL	DIAPH2	6.59666e-06	TRUE	vRG	3.13795	2.07463
1.25014e-06	-0.229957	0.092	0.14	0.0332625	DS_vs_CTL	TOPBP1	6.59666e-06	FALSE	vRG	0.505361	0.430773
1.25056e-06	-0.0307101	0.06	0.09	0.0332736	DS_vs_CTL	SHF	6.59666e-06	FALSE	vRG	0.253512	0.248176
1.25389e-06	0.0482697	0.158	0.195	0.0333622	DS_vs_CTL	DHX30	6.61033e-06	FALSE	vRG	0.7113	0.735562
1.26055e-06	0.185573	0.399	0.425	0.0335395	DS_vs_CTL	MAP4K3	6.63815e-06	FALSE	vRG	2.01681	2.29382
1.26064e-06	0.716551	0.126	0.106	0.0335419	DS_vs_CTL	PFKL	6.63815e-06	TRUE	vRG	0.29106	0.478977
1.26171e-06	-0.212083	0.11	0.165	0.0335703	DS_vs_CTL	RING1	6.63987e-06	FALSE	vRG	0.530542	0.457895
1.26638e-06	0.131946	0.147	0.176	0.0336947	DS_vs_CTL	SUPT16H	6.66057e-06	FALSE	vRG	0.685825	0.751632
1.26817e-06	-0.0135408	0.054	0.082	0.0337422	DS_vs_CTL	MTMR14	6.66605e-06	FALSE	vRG	0.244362	0.242094
1.27045e-06	-0.336939	0.15	0.219	0.0338028	DS_vs_CTL	SORCS2	6.67269e-06	TRUE	vRG	0.988516	0.782437
1.27092e-06	0.179872	0.243	0.269	0.0338153	DS_vs_CTL	LRRFIP2	6.67269e-06	FALSE	vRG	1.1224	1.2716
1.27259e-06	-1.02092	0.022	0.064	0.0338598	DS_vs_CTL	CCDC107	6.67757e-06	TRUE	vRG	0.136773	0.0669013
1.27465e-06	-0.804035	0.022	0.061	0.0339147	DS_vs_CTL	PYURF	6.68447e-06	TRUE	vRG	0.171771	0.0979628
1.27781e-06	-0.0562163	0.177	0.23	0.0339986	DS_vs_CTL	DCAF7	6.69711e-06	FALSE	vRG	0.954873	0.918366
1.27855e-06	-0.0963505	0.199	0.255	0.0340185	DS_vs_CTL	SARNP	6.69712e-06	FALSE	vRG	1.02275	0.956631
1.28143e-06	0.0778516	0.195	0.229	0.0340949	DS_vs_CTL	GARS-DT	6.70825e-06	FALSE	vRG	0.900466	0.950475
1.28315e-06	-0.055865	0.34	0.406	0.0341409	DS_vs_CTL	SCFD1	6.71337e-06	FALSE	vRG	1.96036	1.88589
1.28815e-06	-0.357371	0.165	0.241	0.0342737	DS_vs_CTL	KDM5A	6.73557e-06	TRUE	vRG	0.964193	0.752433
1.29107e-06	0.0739606	0.122	0.152	0.0343514	DS_vs_CTL	AL121749.2	6.74691e-06	FALSE	vRG	0.637591	0.67121
1.29266e-06	-0.315213	0.206	0.288	0.0343938	DS_vs_CTL	MTAP	6.7513e-06	TRUE	vRG	1.34763	1.08295
1.30322e-06	0.0113333	0.358	0.412	0.0346747	DS_vs_CTL	STAG2	6.80248e-06	FALSE	vRG	2.15778	2.17483
1.31206e-06	-0.216116	0.36	0.455	0.0349099	DS_vs_CTL	GLG1	6.84465e-06	FALSE	vRG	2.38835	2.05597
1.31314e-06	-0.540307	0.066	0.121	0.0349387	DS_vs_CTL	ATP6V1G1	6.84632e-06	TRUE	vRG	0.394617	0.27105
1.31439e-06	-0.344593	0.099	0.159	0.034972	DS_vs_CTL	DSTN	6.84887e-06	TRUE	vRG	0.581569	0.457808
1.32114e-06	0.0895877	0.178	0.211	0.0351515	DS_vs_CTL	TTC27	6.87613e-06	FALSE	vRG	0.886112	0.942974
1.32115e-06	0.388413	0.081	0.099	0.035152	DS_vs_CTL	OTUB1	6.87613e-06	TRUE	vRG	0.191092	0.250476
1.33114e-06	-0.102002	0.371	0.455	0.0354177	DS_vs_CTL	FMNL2	6.9223e-06	FALSE	vRG	2.24524	2.09193
1.33227e-06	-0.549174	0.408	0.523	0.0354477	DS_vs_CTL	CADM1	6.9223e-06	TRUE	vRG	3.49975	2.39147
1.33234e-06	-0.0351968	0.238	0.288	0.0354495	DS_vs_CTL	SNX9	6.9223e-06	FALSE	vRG	1.26017	1.2298
1.33454e-06	0.436466	0.555	0.484	0.0355081	DS_vs_CTL	BACH2	6.92972e-06	TRUE	vRG	2.91304	3.94257
1.33618e-06	-0.394366	0.063	0.111	0.0355519	DS_vs_CTL	ATP5MPL	6.93426e-06	TRUE	vRG	0.350166	0.266192
1.34318e-06	0.70501	0.16	0.136	0.035738	DS_vs_CTL	AC008771.1	6.96655e-06	TRUE	vRG	0.560257	0.913984
1.34551e-06	-0.000702719	0.21	0.253	0.0357999	DS_vs_CTL	SGSM2	6.97458e-06	FALSE	vRG	0.862532	0.862137
1.35805e-06	0.0656493	0.258	0.304	0.0361336	DS_vs_CTL	PPP2R5C	7.03452e-06	FALSE	vRG	1.33783	1.40018
1.35864e-06	-0.0373438	0.314	0.377	0.0361493	DS_vs_CTL	FOXJ3	7.03452e-06	FALSE	vRG	1.70065	1.65719
1.36178e-06	0.290048	0.252	0.253	0.0362329	DS_vs_CTL	TAB2	7.04672e-06	TRUE	vRG	1.08745	1.32987
1.36593e-06	0.241079	0.084	0.101	0.0363432	DS_vs_CTL	AP2A1	7.06048e-06	FALSE	vRG	0.325052	0.384385
1.36601e-06	0.0414063	0.378	0.436	0.0363455	DS_vs_CTL	HECTD4	7.06048e-06	FALSE	vRG	2.01576	2.07451
1.38358e-06	-0.552717	0.075	0.134	0.0368129	DS_vs_CTL	CDKL2	7.14717e-06	TRUE	vRG	0.45959	0.313014
1.38755e-06	-0.654945	0.035	0.078	0.0369185	DS_vs_CTL	TMEM258	7.16355e-06	TRUE	vRG	0.23857	0.151162
1.3947e-06	-0.164323	0.111	0.16	0.0371087	DS_vs_CTL	UBE2V1	7.19631e-06	FALSE	vRG	0.580516	0.517935
1.39593e-06	-0.292611	0.057	0.095	0.0371414	DS_vs_CTL	TLN1	7.19852e-06	TRUE	vRG	0.295204	0.240846
1.39716e-06	-0.363214	0.064	0.121	0.0371742	DS_vs_CTL	CD151	7.20073e-06	TRUE	vRG	0.280587	0.217931
1.40305e-06	-0.620796	0.048	0.098	0.0373309	DS_vs_CTL	FBLN1	7.22695e-06	TRUE	vRG	0.346442	0.224958
1.40868e-06	0.0394769	0.05	0.075	0.0374808	DS_vs_CTL	TMEM219	7.25181e-06	FALSE	vRG	0.195233	0.200703
1.41269e-06	0.142638	0.198	0.23	0.0375875	DS_vs_CTL	METTL16	7.26828e-06	FALSE	vRG	1.01273	1.1181
1.42973e-06	0.0948646	0.442	0.488	0.0380409	DS_vs_CTL	RUFY3	7.35173e-06	FALSE	vRG	2.48797	2.65716
1.43754e-06	-0.428491	0.131	0.204	0.0382487	DS_vs_CTL	JARID2	7.38767e-06	TRUE	vRG	0.870239	0.64638
1.44229e-06	0.186902	0.092	0.114	0.0383749	DS_vs_CTL	ZNF507	7.4078e-06	FALSE	vRG	0.367523	0.418526
1.44563e-06	-0.285877	0.076	0.12	0.0384639	DS_vs_CTL	CHERP	7.42074e-06	TRUE	vRG	0.438659	0.359646
1.44663e-06	-1.89523	0.059	0.116	0.0384906	DS_vs_CTL	CNTN5	7.42165e-06	TRUE	vRG	0.95853	0.256949
1.45724e-06	1.99805	0.076	0.028	0.0387728	DS_vs_CTL	RYR2	7.47179e-06	TRUE	vRG	0.0496292	0.20138
1.46064e-06	-0.168915	0.127	0.177	0.0388632	DS_vs_CTL	MOB4	7.48494e-06	FALSE	vRG	0.65048	0.578521
1.46216e-06	0.462504	0.083	0.089	0.0389038	DS_vs_CTL	ODF2	7.48848e-06	TRUE	vRG	0.28746	0.396518
1.46315e-06	-1.00026	0.053	0.115	0.0389299	DS_vs_CTL	CD276	7.48924e-06	TRUE	vRG	0.385833	0.192389
1.47494e-06	0.686097	0.114	0.103	0.0392438	DS_vs_CTL	SH3PXD2A	7.54532e-06	TRUE	vRG	0.33122	0.533566
1.47603e-06	0.23882	0.182	0.202	0.0392727	DS_vs_CTL	PCGF3	7.54658e-06	FALSE	vRG	0.697716	0.823536
1.48014e-06	-0.269881	0.078	0.126	0.039382	DS_vs_CTL	SREK1IP1	7.56326e-06	TRUE	vRG	0.453656	0.376105
1.49225e-06	-0.0597718	0.047	0.074	0.0397043	DS_vs_CTL	MAP3K8	7.62084e-06	FALSE	vRG	0.247325	0.237271
1.49448e-06	-1.7032	0.017	0.061	0.0397636	DS_vs_CTL	AL157931.1	7.6243e-06	TRUE	vRG	0.225893	0.0686793
1.49463e-06	-0.0292632	0.451	0.519	0.0397676	DS_vs_CTL	TET1	7.6243e-06	FALSE	vRG	3.17672	3.11294
1.50258e-06	0.251896	0.119	0.138	0.0399791	DS_vs_CTL	PPWD1	7.6605e-06	TRUE	vRG	0.458643	0.546362
1.50629e-06	-0.470677	0.16	0.24	0.0400778	DS_vs_CTL	HMGN2	7.67506e-06	TRUE	vRG	0.952368	0.68699
1.50921e-06	-0.414805	0.08	0.134	0.0401555	DS_vs_CTL	NDRG2	7.68558e-06	TRUE	vRG	0.416148	0.311928
1.51432e-06	0.259737	0.194	0.211	0.0402916	DS_vs_CTL	NLK	7.70724e-06	TRUE	vRG	0.902348	1.08058
1.51518e-06	-0.688663	0.041	0.092	0.0403144	DS_vs_CTL	CD81	7.70724e-06	TRUE	vRG	0.276209	0.170999
1.52642e-06	-0.158647	0.044	0.078	0.0406136	DS_vs_CTL	TNK2	7.76005e-06	FALSE	vRG	0.168205	0.150606
1.52875e-06	-0.116765	0.039	0.074	0.0406754	DS_vs_CTL	SOX3	7.76746e-06	FALSE	vRG	0.243807	0.224797
1.53218e-06	1.31144	0.105	0.061	0.0407666	DS_vs_CTL	DAAM2	7.78048e-06	TRUE	vRG	0.257282	0.640111
1.53387e-06	-0.201061	0.122	0.175	0.0408117	DS_vs_CTL	ATP6V1H	7.78468e-06	FALSE	vRG	0.667186	0.580282
1.53685e-06	0.328983	0.327	0.326	0.040891	DS_vs_CTL	PRKACB	7.7954e-06	TRUE	vRG	1.43301	1.80033
1.54205e-06	0.0921213	0.283	0.325	0.0410294	DS_vs_CTL	HMBOX1	7.81737e-06	FALSE	vRG	1.40477	1.49749
1.55035e-06	-0.431891	0.123	0.196	0.0412501	DS_vs_CTL	IDI1	7.85499e-06	TRUE	vRG	0.820099	0.607688
1.5545e-06	0.251672	0.244	0.253	0.0413607	DS_vs_CTL	APTX	7.86945e-06	TRUE	vRG	1.11994	1.33361
1.55496e-06	-0.059022	0.21	0.266	0.0413727	DS_vs_CTL	DYNC1I2	7.86945e-06	FALSE	vRG	0.970698	0.931771
1.55768e-06	-0.18072	0.174	0.233	0.0414451	DS_vs_CTL	GOLIM4	7.87877e-06	FALSE	vRG	0.974952	0.860066
1.55901e-06	0.216069	0.095	0.116	0.0414807	DS_vs_CTL	WIPI2	7.87939e-06	FALSE	vRG	0.3674	0.426952
1.55955e-06	0.472932	0.105	0.109	0.0414951	DS_vs_CTL	ZNF736	7.87939e-06	TRUE	vRG	0.340904	0.473577
1.56464e-06	-0.0960206	0.115	0.16	0.0416303	DS_vs_CTL	FUT10	7.90063e-06	FALSE	vRG	0.700777	0.655612
1.56788e-06	-0.0537886	0.15	0.192	0.0417167	DS_vs_CTL	ZNF337	7.91257e-06	FALSE	vRG	0.675419	0.650688
1.57203e-06	0.0524512	0.118	0.157	0.0418269	DS_vs_CTL	ATL2	7.92902e-06	FALSE	vRG	0.539363	0.559396
1.57757e-06	-0.340162	0.675	0.776	0.0419743	DS_vs_CTL	MSI2	7.9525e-06	TRUE	vRG	8.68215	6.8583
1.58211e-06	-0.117874	0.303	0.374	0.0420952	DS_vs_CTL	RBM33	7.97092e-06	FALSE	vRG	1.56452	1.44172
1.58579e-06	-0.310996	0.205	0.288	0.0421931	DS_vs_CTL	SEC63	7.98498e-06	TRUE	vRG	1.1923	0.960918
1.58829e-06	0.0817364	0.175	0.217	0.0422595	DS_vs_CTL	TEX9	7.99307e-06	FALSE	vRG	0.938105	0.992873
1.59243e-06	0.111249	0.329	0.361	0.0423699	DS_vs_CTL	UBE4B	8.00946e-06	FALSE	vRG	1.73646	1.87577
1.59701e-06	-0.121112	0.059	0.092	0.0424918	DS_vs_CTL	ZNFX1	8.028e-06	FALSE	vRG	0.307094	0.282308
1.60301e-06	-0.0325845	0.113	0.154	0.0426512	DS_vs_CTL	MTMR1	8.0536e-06	FALSE	vRG	0.562801	0.550234
1.60403e-06	-0.282967	0.087	0.136	0.0426786	DS_vs_CTL	SEL1L	8.05426e-06	TRUE	vRG	0.466073	0.382905
1.61482e-06	0.0974179	0.157	0.189	0.0429656	DS_vs_CTL	YY1AP1	8.1039e-06	FALSE	vRG	0.606179	0.648623
1.62762e-06	1.04919	0.098	0.07	0.0433062	DS_vs_CTL	SETD4	8.16358e-06	TRUE	vRG	0.226339	0.469513
1.63332e-06	-0.116308	0.088	0.132	0.0434576	DS_vs_CTL	FKBP3	8.18755e-06	FALSE	vRG	0.445979	0.41138
1.63545e-06	-0.164253	0.1	0.144	0.0435143	DS_vs_CTL	SPART	8.19365e-06	FALSE	vRG	0.480844	0.429014
1.64062e-06	-0.242055	0.038	0.076	0.0436521	DS_vs_CTL	SDR39U1	8.21501e-06	FALSE	vRG	0.147687	0.12474
1.6523e-06	0.243387	0.088	0.111	0.0439627	DS_vs_CTL	ARHGEF6	8.26433e-06	FALSE	vRG	0.402749	0.476977
1.65231e-06	0.568966	0.063	0.066	0.0439631	DS_vs_CTL	ANKRD20A4	8.26433e-06	TRUE	vRG	0.209192	0.310855
1.65628e-06	0.654606	0.156	0.133	0.0440687	DS_vs_CTL	ANKAR	8.27956e-06	TRUE	vRG	0.506304	0.797637
1.67301e-06	0.119416	0.182	0.216	0.0445137	DS_vs_CTL	ZC3H13	8.3553e-06	FALSE	vRG	0.749393	0.814176
1.67329e-06	-0.711799	0.035	0.08	0.0445213	DS_vs_CTL	HTATSF1	8.3553e-06	TRUE	vRG	0.257823	0.157037
1.67676e-06	1.91358	0.064	0.019	0.0446135	DS_vs_CTL	SNAI3	8.36795e-06	TRUE	vRG	0.071817	0.273462
1.67773e-06	-0.547508	0.078	0.138	0.0446393	DS_vs_CTL	VRK1	8.36812e-06	TRUE	vRG	0.537208	0.367256
1.68033e-06	-0.118457	0.322	0.402	0.0447085	DS_vs_CTL	CPSF6	8.37646e-06	FALSE	vRG	1.88476	1.73614
1.69205e-06	-0.83535	0.072	0.141	0.0450203	DS_vs_CTL	NDUFA4	8.43018e-06	TRUE	vRG	0.482603	0.270043
1.69314e-06	-0.146967	0.291	0.368	0.0450494	DS_vs_CTL	HNRNPM	8.43096e-06	FALSE	vRG	1.50371	1.358
1.69905e-06	0.0358094	0.147	0.187	0.0452065	DS_vs_CTL	SETD3	8.45567e-06	FALSE	vRG	0.740325	0.758981
1.70239e-06	-0.0822156	0.088	0.122	0.0452955	DS_vs_CTL	NBPF15	8.46763e-06	FALSE	vRG	0.417291	0.394144
1.71052e-06	0.0305329	0.149	0.189	0.0455119	DS_vs_CTL	VCP	8.50337e-06	FALSE	vRG	0.744828	0.760807
1.72606e-06	0.463334	0.45	0.36	0.0459253	DS_vs_CTL	RGS7	8.57586e-06	TRUE	vRG	2.82344	3.89316
1.73172e-06	-0.402877	0.165	0.243	0.0460758	DS_vs_CTL	EIF4G2	8.5992e-06	TRUE	vRG	0.935738	0.707516
1.7619e-06	0.0827408	0.168	0.198	0.0468788	DS_vs_CTL	G3BP1	8.74423e-06	FALSE	vRG	0.794777	0.841777
1.76288e-06	-0.0303089	0.474	0.546	0.0469049	DS_vs_CTL	GNB1	8.74426e-06	FALSE	vRG	3.05823	2.99466
1.77096e-06	-0.0975488	0.428	0.499	0.0471199	DS_vs_CTL	KDM2A	8.7795e-06	FALSE	vRG	2.86344	2.67618
1.7742e-06	-0.0786125	0.251	0.304	0.0472061	DS_vs_CTL	MTREX	8.79071e-06	FALSE	vRG	1.35076	1.27909
1.77991e-06	-0.243698	0.295	0.381	0.0473579	DS_vs_CTL	PDLIM5	8.81411e-06	FALSE	vRG	2.06541	1.74427
1.79245e-06	0.1423	0.257	0.284	0.0476916	DS_vs_CTL	HTT	8.86924e-06	FALSE	vRG	1.21091	1.33657
1.79301e-06	-0.117391	0.087	0.129	0.0477067	DS_vs_CTL	SIAH1	8.86924e-06	FALSE	vRG	0.406219	0.374419
1.798e-06	-0.0705796	0.272	0.337	0.0478395	DS_vs_CTL	CMIP	8.8864e-06	FALSE	vRG	1.62765	1.54991
1.79846e-06	-0.235718	0.182	0.252	0.0478517	DS_vs_CTL	HACE1	8.8864e-06	FALSE	vRG	1.00049	0.849547
1.8123e-06	0.266926	0.225	0.235	0.0482199	DS_vs_CTL	PFKFB3	8.94986e-06	TRUE	vRG	0.993896	1.19613
1.82174e-06	0.376813	0.17	0.169	0.0484711	DS_vs_CTL	FAM120C	8.99154e-06	TRUE	vRG	0.679276	0.882355
1.83288e-06	0.188728	0.101	0.124	0.0487675	DS_vs_CTL	BRD2	9.04156e-06	FALSE	vRG	0.421977	0.481122
1.84162e-06	-0.367416	0.092	0.146	0.0490001	DS_vs_CTL	MED28	9.07968e-06	TRUE	vRG	0.487261	0.377502
1.84627e-06	0.278265	0.204	0.215	0.0491236	DS_vs_CTL	CHD8	9.09758e-06	TRUE	vRG	0.883469	1.07166
1.85062e-06	-0.00136796	0.162	0.201	0.0492395	DS_vs_CTL	MECP2	9.11403e-06	FALSE	vRG	0.787602	0.78688
1.85644e-06	0.872158	0.2	0.136	0.0493942	DS_vs_CTL	GRIK1	9.13765e-06	TRUE	vRG	0.746746	1.36773
1.877e-06	-0.502765	0.077	0.133	0.0499412	DS_vs_CTL	ARF1	9.23379e-06	TRUE	vRG	0.482587	0.340307
1.88134e-06	-0.507817	0.128	0.204	0.0500568	DS_vs_CTL	SEM1	9.2501e-06	TRUE	vRG	0.862448	0.606265
1.88328e-06	-0.0967531	0.278	0.346	0.0501084	DS_vs_CTL	KIF2A	9.25145e-06	FALSE	vRG	1.55047	1.44985
1.88368e-06	-0.244013	0.14	0.2	0.050119	DS_vs_CTL	AKT2	9.25145e-06	FALSE	vRG	0.66606	0.56228
1.8895e-06	-0.0848701	0.352	0.418	0.050274	DS_vs_CTL	KMT5B	9.27499e-06	FALSE	vRG	2.05931	1.94163
1.89627e-06	-0.484575	0.051	0.099	0.0504541	DS_vs_CTL	DCAF13	9.29487e-06	TRUE	vRG	0.319516	0.22809
1.89638e-06	0.423119	0.116	0.118	0.0504568	DS_vs_CTL	RIOK3	9.29487e-06	TRUE	vRG	0.38371	0.514866
1.89666e-06	0.131881	0.374	0.397	0.0504644	DS_vs_CTL	PLEKHG1	9.29487e-06	FALSE	vRG	2.27418	2.49199
1.90636e-06	-0.12272	0.064	0.099	0.0507224	DS_vs_CTL	TMEM248	9.33729e-06	FALSE	vRG	0.353777	0.324868
1.90785e-06	-0.044777	0.341	0.408	0.0507623	DS_vs_CTL	UBE3A	9.33954e-06	FALSE	vRG	1.96107	1.90113
1.91191e-06	-0.422138	0.095	0.157	0.0508701	DS_vs_CTL	ZNF706	9.34918e-06	TRUE	vRG	0.531591	0.396498
1.91292e-06	-0.301764	0.076	0.134	0.050897	DS_vs_CTL	NEUROD2	9.34918e-06	TRUE	vRG	0.295226	0.239335
1.91343e-06	-0.221636	0.239	0.316	0.0509107	DS_vs_CTL	MAN1A2	9.34918e-06	FALSE	vRG	1.49137	1.27886
1.91399e-06	-0.373488	0.089	0.147	0.0509255	DS_vs_CTL	PRMT1	9.34918e-06	TRUE	vRG	0.510386	0.393763
1.91778e-06	-0.299855	0.054	0.101	0.0510263	DS_vs_CTL	MRPL43	9.36259e-06	TRUE	vRG	0.218307	0.177169
1.9207e-06	0.0350272	0.148	0.186	0.051104	DS_vs_CTL	FBXO21	9.37176e-06	FALSE	vRG	0.690896	0.707926
1.92489e-06	0.267905	0.128	0.149	0.0512156	DS_vs_CTL	TBCB	9.38511e-06	TRUE	vRG	0.446865	0.538288
1.92553e-06	0.243863	0.247	0.261	0.0512325	DS_vs_CTL	GTF2F2	9.38511e-06	FALSE	vRG	1.13223	1.34096
1.93632e-06	0.186726	0.157	0.178	0.0515196	DS_vs_CTL	GNPAT	9.43259e-06	FALSE	vRG	0.694773	0.790944
1.93939e-06	0.604892	0.142	0.126	0.0516013	DS_vs_CTL	PRUNE2	9.44243e-06	TRUE	vRG	0.43932	0.668712
1.95006e-06	-0.0584692	0.191	0.241	0.0518853	DS_vs_CTL	VPS35L	9.48924e-06	FALSE	vRG	1.03016	0.989225
1.95205e-06	-0.117602	0.103	0.149	0.0519381	DS_vs_CTL	EPM2AIP1	9.49375e-06	FALSE	vRG	0.495033	0.456225
1.96058e-06	0.0459832	0.116	0.144	0.0521652	DS_vs_CTL	HPS4	9.5301e-06	FALSE	vRG	0.526251	0.543353
1.96255e-06	0.473184	0.154	0.152	0.0522176	DS_vs_CTL	CPEB4	9.53451e-06	TRUE	vRG	0.5626	0.781412
1.98557e-06	0.449387	0.316	0.286	0.05283	DS_vs_CTL	CTTNBP2	9.63989e-06	TRUE	vRG	1.07764	1.47187
1.98639e-06	0.0123327	0.224	0.269	0.0528518	DS_vs_CTL	PHF3	9.63989e-06	FALSE	vRG	1.14186	1.1517
1.98883e-06	0.0117766	0.055	0.084	0.0529168	DS_vs_CTL	GUK1	9.64653e-06	FALSE	vRG	0.203264	0.204964
1.99071e-06	0.248494	0.285	0.29	0.0529668	DS_vs_CTL	ABL2	9.65043e-06	FALSE	vRG	1.28572	1.52762
2.00914e-06	-0.255731	0.083	0.129	0.0534572	DS_vs_CTL	YPEL3	9.73451e-06	TRUE	vRG	0.401253	0.335931
2.01754e-06	-0.113935	0.494	0.581	0.0536807	DS_vs_CTL	NCOR1	9.76995e-06	FALSE	vRG	3.47342	3.20961
2.02542e-06	-0.596763	0.07	0.13	0.0538903	DS_vs_CTL	ABHD17C	9.80281e-06	TRUE	vRG	0.510117	0.336981
2.03602e-06	0.109885	0.158	0.194	0.0541723	DS_vs_CTL	SYNGAP1	9.8488e-06	FALSE	vRG	0.668046	0.721024
2.04053e-06	-0.330434	0.076	0.12	0.0542924	DS_vs_CTL	HTRA1	9.86531e-06	TRUE	vRG	0.436023	0.34658
2.04776e-06	-1.61485	0.025	0.075	0.0544848	DS_vs_CTL	TRIM56	9.89081e-06	TRUE	vRG	0.31523	0.102249
2.04801e-06	-0.0626229	0.126	0.166	0.0544914	DS_vs_CTL	PAICS	9.89081e-06	FALSE	vRG	0.627908	0.601216
2.05803e-06	0.186333	0.231	0.252	0.0547579	DS_vs_CTL	HCG17	9.93386e-06	FALSE	vRG	1.03122	1.17356
2.06072e-06	0.0698079	0.456	0.506	0.0548296	DS_vs_CTL	GPBP1	9.94151e-06	FALSE	vRG	2.70218	2.83622
2.08524e-06	-0.250212	0.172	0.245	0.0554819	DS_vs_CTL	RSRC1	1.00544e-05	TRUE	vRG	1.0341	0.8693
2.09996e-06	-0.0184572	0.083	0.112	0.0558737	DS_vs_CTL	STIP1	1.01199e-05	FALSE	vRG	0.39899	0.39393
2.10164e-06	-0.312926	0.134	0.197	0.0559184	DS_vs_CTL	MFSD14A	1.01226e-05	TRUE	vRG	0.765538	0.616086
2.12395e-06	0.207027	0.234	0.253	0.0565121	DS_vs_CTL	REV1	1.02246e-05	FALSE	vRG	0.975254	1.12593
2.1312e-06	-0.852439	0.046	0.1	0.056705	DS_vs_CTL	FJX1	1.0254e-05	TRUE	vRG	0.381246	0.210715
2.1346e-06	0.795719	0.15	0.116	0.0567954	DS_vs_CTL	AZIN2	1.02614e-05	TRUE	vRG	0.454594	0.789938
2.13548e-06	0.268569	0.116	0.131	0.0568186	DS_vs_CTL	UBA1	1.02614e-05	TRUE	vRG	0.386534	0.465861
2.13617e-06	-0.638308	0.06	0.114	0.0568371	DS_vs_CTL	UBE2Z	1.02614e-05	TRUE	vRG	0.412117	0.264426
2.13955e-06	0.0757343	0.262	0.295	0.056927	DS_vs_CTL	MRC2	1.02721e-05	FALSE	vRG	1.42483	1.50171
2.14208e-06	-0.124126	0.277	0.341	0.0569943	DS_vs_CTL	AASS	1.02788e-05	FALSE	vRG	1.57139	1.44178
2.14598e-06	-0.247936	0.112	0.164	0.0570981	DS_vs_CTL	C19orf25	1.0289e-05	FALSE	vRG	0.655695	0.552023
2.1465e-06	-0.360842	0.153	0.226	0.0571119	DS_vs_CTL	CSDE1	1.0289e-05	TRUE	vRG	0.805642	0.627157
2.14798e-06	-0.131829	0.136	0.188	0.0571514	DS_vs_CTL	UBE2I	1.02906e-05	FALSE	vRG	0.660106	0.602396
2.1579e-06	0.265658	0.107	0.126	0.0574152	DS_vs_CTL	SAP30BP	1.03326e-05	TRUE	vRG	0.3689	0.443721
2.17463e-06	-0.257293	0.194	0.271	0.0578605	DS_vs_CTL	GDI2	1.04072e-05	TRUE	vRG	1.08632	0.908733
2.18153e-06	0.629563	0.155	0.142	0.058044	DS_vs_CTL	STXBP1	1.04247e-05	TRUE	vRG	0.43051	0.666633
2.18175e-06	0.131533	0.088	0.115	0.0580497	DS_vs_CTL	ZNF318	1.04247e-05	FALSE	vRG	0.3723	0.407963
2.18244e-06	-0.456051	0.189	0.282	0.0580682	DS_vs_CTL	RPL10A	1.04247e-05	TRUE	vRG	1.02147	0.744377
2.18295e-06	-0.0473417	0.106	0.142	0.0580817	DS_vs_CTL	KDM4A	1.04247e-05	FALSE	vRG	0.50118	0.484992
2.18635e-06	-0.224457	0.124	0.179	0.0581721	DS_vs_CTL	MRPS31	1.04354e-05	FALSE	vRG	0.663313	0.567616
2.18948e-06	0.536866	0.23	0.204	0.0582554	DS_vs_CTL	STARD13	1.04448e-05	TRUE	vRG	0.95354	1.38391
2.19775e-06	-0.781854	0.052	0.107	0.0584755	DS_vs_CTL	C18orf32	1.04757e-05	TRUE	vRG	0.34485	0.200162
2.19832e-06	-0.117097	0.308	0.376	0.0584908	DS_vs_CTL	ZNF721	1.04757e-05	FALSE	vRG	1.85724	1.7124
2.20037e-06	-0.0178894	0.151	0.192	0.0585453	DS_vs_CTL	SEC23A	1.04757e-05	FALSE	vRG	0.764437	0.755029
2.20062e-06	0.098807	0.145	0.173	0.0585518	DS_vs_CTL	REEP5	1.04757e-05	FALSE	vRG	0.652354	0.698697
2.21327e-06	0.418394	0.117	0.137	0.0588884	DS_vs_CTL	PDZRN3	1.05303e-05	TRUE	vRG	0.642541	0.859091
2.22104e-06	0.24211	0.511	0.51	0.0590953	DS_vs_CTL	RAB6A	1.05617e-05	FALSE	vRG	3.04292	3.59914
2.25511e-06	0.479146	0.079	0.085	0.0600018	DS_vs_CTL	MPHOSPH6	1.07181e-05	TRUE	vRG	0.246542	0.344093
2.25736e-06	0.0993665	0.174	0.203	0.0600615	DS_vs_CTL	TIAL1	1.0723e-05	FALSE	vRG	0.71711	0.768342
2.26577e-06	1.25515	0.111	0.063	0.0602852	DS_vs_CTL	KIF26B-AS1	1.07573e-05	TRUE	vRG	0.238762	0.571369
2.2706e-06	-0.550798	0.045	0.086	0.060414	DS_vs_CTL	TMEM30A	1.07746e-05	TRUE	vRG	0.28376	0.193403
2.28297e-06	-0.0395828	0.228	0.283	0.0607429	DS_vs_CTL	PHF20L1	1.08275e-05	FALSE	vRG	1.1027	1.07286
2.29918e-06	0.666373	0.223	0.175	0.0611743	DS_vs_CTL	GMDS	1.08986e-05	TRUE	vRG	0.750804	1.19222
2.30101e-06	-0.27098	0.178	0.253	0.061223	DS_vs_CTL	ARHGEF9	1.09016e-05	TRUE	vRG	1.04216	0.863542
2.30288e-06	-0.387735	0.121	0.186	0.0612726	DS_vs_CTL	SMIM7	1.09047e-05	TRUE	vRG	0.740802	0.565997
2.30959e-06	-0.593824	0.101	0.174	0.0614514	DS_vs_CTL	UBA52	1.09307e-05	TRUE	vRG	0.62418	0.413247
2.31118e-06	0.164777	0.286	0.314	0.0614935	DS_vs_CTL	IFT43	1.09324e-05	FALSE	vRG	1.34863	1.51195
2.3281e-06	-0.524464	0.06	0.114	0.0619437	DS_vs_CTL	RABAC1	1.10041e-05	TRUE	vRG	0.360387	0.250256
2.32878e-06	0.225221	0.195	0.213	0.061962	DS_vs_CTL	CCDC92	1.10041e-05	FALSE	vRG	0.797162	0.932048
2.33081e-06	-0.150602	0.212	0.278	0.0620159	DS_vs_CTL	UBXN7	1.10079e-05	FALSE	vRG	1.19148	1.0733
2.33328e-06	-0.49248	0.192	0.285	0.0620817	DS_vs_CTL	FGFR1	1.10138e-05	TRUE	vRG	1.46504	1.04108
2.33577e-06	-0.209109	0.08	0.123	0.0621478	DS_vs_CTL	TTI1	1.10197e-05	FALSE	vRG	0.4204	0.363561
2.34903e-06	-0.169225	0.146	0.198	0.0625008	DS_vs_CTL	MOB1B	1.10765e-05	FALSE	vRG	0.846289	0.752532
2.35298e-06	1.1068	0.198	0.127	0.0626057	DS_vs_CTL	GRIN2B	1.10871e-05	TRUE	vRG	0.42022	0.906239
2.35375e-06	-0.176884	0.1	0.144	0.0626262	DS_vs_CTL	FAT1	1.10871e-05	FALSE	vRG	0.554223	0.490178
2.36313e-06	-0.000672093	0.077	0.108	0.0628757	DS_vs_CTL	PGS1	1.11154e-05	FALSE	vRG	0.358282	0.35814
2.36399e-06	0.420537	0.131	0.134	0.0628986	DS_vs_CTL	YTHDF2	1.11154e-05	TRUE	vRG	0.451554	0.604748
2.36419e-06	-1.6142	0.013	0.052	0.0629039	DS_vs_CTL	NAALAD2	1.11154e-05	TRUE	vRG	0.187662	0.0606258
2.36472e-06	0.201569	0.28	0.287	0.0629182	DS_vs_CTL	RIF1	1.11154e-05	FALSE	vRG	1.24432	1.43108
2.3696e-06	-0.230309	0.109	0.158	0.0630479	DS_vs_CTL	PDCD7	1.11325e-05	FALSE	vRG	0.619207	0.527717
2.37156e-06	0.433655	0.059	0.075	0.0631001	DS_vs_CTL	NDRG4	1.11359e-05	TRUE	vRG	0.183507	0.248243
2.38579e-06	-0.143504	0.069	0.105	0.0634787	DS_vs_CTL	METAP1	1.11969e-05	FALSE	vRG	0.334524	0.302777
2.41006e-06	-0.36878	0.043	0.081	0.0641245	DS_vs_CTL	SNRPD3	1.13049e-05	TRUE	vRG	0.268131	0.207442
2.42057e-06	0.160853	0.141	0.162	0.0644041	DS_vs_CTL	PARN	1.13482e-05	FALSE	vRG	0.657582	0.735291
2.42569e-06	0.0597282	0.441	0.488	0.0645404	DS_vs_CTL	CHD6	1.13663e-05	FALSE	vRG	2.6344	2.74582
2.43086e-06	0.108039	0.313	0.355	0.0646778	DS_vs_CTL	ZMYND11	1.13846e-05	FALSE	vRG	1.60179	1.72646
2.44334e-06	-0.307223	0.112	0.168	0.0650101	DS_vs_CTL	KAT2B	1.14371e-05	TRUE	vRG	0.667182	0.53904
2.461e-06	-0.462688	0.182	0.271	0.0654798	DS_vs_CTL	GDAP1	1.15137e-05	TRUE	vRG	1.19428	0.86635
2.47421e-06	0.380782	0.193	0.194	0.0658314	DS_vs_CTL	AP002026.1	1.15695e-05	TRUE	vRG	0.817463	1.06471
2.47941e-06	-0.180184	0.128	0.179	0.0659698	DS_vs_CTL	IGF2R	1.15878e-05	FALSE	vRG	0.708509	0.625227
2.49916e-06	0.167894	0.296	0.316	0.0664952	DS_vs_CTL	AUH	1.1674e-05	FALSE	vRG	1.45986	1.64018
2.50115e-06	-0.170014	0.263	0.339	0.0665481	DS_vs_CTL	MORF4L1	1.16772e-05	FALSE	vRG	1.4515	1.29005
2.5088e-06	-0.034424	0.274	0.331	0.0667517	DS_vs_CTL	PLEKHA8	1.17069e-05	FALSE	vRG	1.47887	1.444
2.51813e-06	-0.440156	0.071	0.126	0.0669999	DS_vs_CTL	RBM3	1.17443e-05	TRUE	vRG	0.290966	0.21421
2.52411e-06	-0.04635	0.153	0.196	0.067159	DS_vs_CTL	NFYC	1.17661e-05	FALSE	vRG	0.788627	0.763686
2.53489e-06	-0.329691	0.143	0.207	0.0674457	DS_vs_CTL	SRGAP2C	1.18102e-05	TRUE	vRG	0.800839	0.637046
2.53877e-06	-0.397	0.073	0.121	0.0675492	DS_vs_CTL	TECR	1.18222e-05	TRUE	vRG	0.412262	0.312862
2.54705e-06	0.0432198	0.154	0.19	0.0677695	DS_vs_CTL	MORF4L2	1.18546e-05	FALSE	vRG	0.669944	0.690374
2.55081e-06	0.141808	0.096	0.126	0.0678695	DS_vs_CTL	PARD6B	1.18659e-05	FALSE	vRG	0.473315	0.522334
2.55215e-06	-0.0779214	0.068	0.103	0.0679051	DS_vs_CTL	GSTK1	1.1866e-05	FALSE	vRG	0.327357	0.310116
2.56087e-06	-0.822873	0.033	0.081	0.0681372	DS_vs_CTL	GTF2A2	1.19004e-05	TRUE	vRG	0.272126	0.153411
2.56632e-06	-0.374826	0.131	0.197	0.068282	DS_vs_CTL	ODR4	1.19195e-05	TRUE	vRG	0.854879	0.659069
2.57813e-06	-0.361636	0.11	0.172	0.0685963	DS_vs_CTL	CHIC2	1.19682e-05	TRUE	vRG	0.737423	0.573718
2.58029e-06	-0.0493882	0.207	0.259	0.0686539	DS_vs_CTL	NSUN6	1.1972e-05	FALSE	vRG	1.10884	1.07151
2.58939e-06	-0.0583404	0.087	0.121	0.0688959	DS_vs_CTL	POU6F1	1.2008e-05	FALSE	vRG	0.398493	0.382685
2.59424e-06	-1.69345	0.019	0.063	0.069025	DS_vs_CTL	PDE7B	1.20216e-05	TRUE	vRG	0.319383	0.0980572
2.59619e-06	-0.54967	0.043	0.084	0.0690769	DS_vs_CTL	LMAN2	1.20216e-05	TRUE	vRG	0.271925	0.18547
2.59634e-06	0.245746	0.08	0.099	0.0690809	DS_vs_CTL	MALSU1	1.20216e-05	FALSE	vRG	0.318596	0.377978
2.59972e-06	0.32023	0.06	0.076	0.0691707	DS_vs_CTL	MDM1	1.20311e-05	TRUE	vRG	0.232528	0.290601
2.60858e-06	-0.118287	0.348	0.435	0.0694064	DS_vs_CTL	GOLM1	1.20658e-05	FALSE	vRG	2.27514	2.09599
2.61284e-06	0.245496	0.095	0.114	0.0695198	DS_vs_CTL	ATP6V0A2	1.20779e-05	FALSE	vRG	0.366161	0.434302
2.61387e-06	0.258792	0.424	0.42	0.0695473	DS_vs_CTL	ASXL1	1.20779e-05	TRUE	vRG	2.10732	2.52158
2.63227e-06	-0.115789	0.155	0.205	0.0700369	DS_vs_CTL	ARL5A	1.21567e-05	FALSE	vRG	0.861968	0.795437
2.64706e-06	-0.206868	0.133	0.191	0.0704303	DS_vs_CTL	RSPRY1	1.22187e-05	FALSE	vRG	0.710376	0.615368
2.64925e-06	0.103145	0.371	0.414	0.0704887	DS_vs_CTL	MBNL2	1.22225e-05	FALSE	vRG	2.2167	2.38109
2.6542e-06	0.239253	0.183	0.197	0.0706203	DS_vs_CTL	FAM227A	1.2239e-05	FALSE	vRG	0.833608	0.984187
2.66434e-06	-0.147833	0.143	0.196	0.0708902	DS_vs_CTL	C7orf50	1.22795e-05	FALSE	vRG	0.781197	0.705037
2.66667e-06	-0.152444	0.177	0.234	0.0709522	DS_vs_CTL	EIF3E	1.22839e-05	FALSE	vRG	0.926923	0.833897
2.66963e-06	-0.71155	0.041	0.087	0.0710307	DS_vs_CTL	EI24	1.22912e-05	TRUE	vRG	0.273073	0.166377
2.688e-06	0.180338	0.124	0.147	0.0715196	DS_vs_CTL	RPS6KB1	1.23695e-05	FALSE	vRG	0.525686	0.595844
2.69688e-06	-1.91818	0.035	0.06	0.071756	DS_vs_CTL	ZNF385B	1.23997e-05	TRUE	vRG	0.440115	0.115712
2.69734e-06	-0.283633	0.24	0.323	0.071768	DS_vs_CTL	GOLGB1	1.23997e-05	TRUE	vRG	1.47889	1.21478
2.70114e-06	0.0434362	0.19	0.229	0.0718693	DS_vs_CTL	ERCC6L2	1.24109e-05	FALSE	vRG	0.913975	0.941968
2.70457e-06	0.0193665	0.352	0.407	0.0719606	DS_vs_CTL	SPG7	1.24203e-05	FALSE	vRG	1.9475	1.97386
2.73404e-06	-0.052381	0.088	0.124	0.0727445	DS_vs_CTL	TTC13	1.25492e-05	FALSE	vRG	0.454175	0.437969
2.73992e-06	0.076877	0.218	0.249	0.0729011	DS_vs_CTL	NUP214	1.25698e-05	FALSE	vRG	1.07111	1.12982
2.80858e-06	-0.361091	0.117	0.18	0.0747278	DS_vs_CTL	ARL6IP1	1.28685e-05	TRUE	vRG	0.70257	0.546799
2.80929e-06	0.211843	0.171	0.189	0.0747467	DS_vs_CTL	STK38	1.28685e-05	FALSE	vRG	0.713353	0.826371
2.80994e-06	-0.0702027	0.141	0.186	0.074764	DS_vs_CTL	BCLAF3	1.28685e-05	FALSE	vRG	0.667864	0.636119
2.81077e-06	-0.232101	0.132	0.187	0.0747862	DS_vs_CTL	RANBP2	1.28685e-05	FALSE	vRG	0.673392	0.573193
2.81348e-06	-0.276996	0.248	0.334	0.0748582	DS_vs_CTL	DNAJB6	1.28743e-05	TRUE	vRG	1.44711	1.19416
2.82451e-06	0.0119728	0.132	0.166	0.0751518	DS_vs_CTL	XPO6	1.29182e-05	FALSE	vRG	0.623535	0.628765
2.83807e-06	0.243035	0.135	0.151	0.0755126	DS_vs_CTL	EIF2B3	1.29736e-05	FALSE	vRG	0.604268	0.715354
2.84078e-06	-0.0367318	0.194	0.246	0.0755848	DS_vs_CTL	CAMK2G	1.29752e-05	FALSE	vRG	1.01665	0.991091
2.84131e-06	0.39803	0.17	0.212	0.0755987	DS_vs_CTL	GFAP	1.29752e-05	TRUE	vRG	1.98653	2.61802
2.85353e-06	0.0632379	0.113	0.147	0.0759238	DS_vs_CTL	APPL1	1.30244e-05	FALSE	vRG	0.525736	0.549365
2.85856e-06	-0.13887	0.409	0.497	0.0760577	DS_vs_CTL	KIF5C	1.30407e-05	FALSE	vRG	2.68531	2.43881
2.87405e-06	0.233161	0.309	0.324	0.0764699	DS_vs_CTL	USP33	1.31047e-05	FALSE	vRG	1.38556	1.6288
2.88387e-06	-0.444491	0.204	0.295	0.0767312	DS_vs_CTL	BCLAF1	1.31428e-05	TRUE	vRG	1.28288	0.942468
2.8883e-06	0.086007	0.263	0.303	0.0768489	DS_vs_CTL	TMEM135	1.31563e-05	FALSE	vRG	1.40876	1.49539
2.89157e-06	-0.0870454	0.579	0.665	0.0769361	DS_vs_CTL	POU2F1	1.31646e-05	FALSE	vRG	4.67085	4.39733
2.90119e-06	-0.313864	0.105	0.161	0.077192	DS_vs_CTL	RAN	1.31963e-05	TRUE	vRG	0.503113	0.404569
2.90149e-06	0.275039	0.068	0.088	0.0771999	DS_vs_CTL	DHPS	1.31963e-05	TRUE	vRG	0.229385	0.277805
2.90501e-06	-0.14296	0.32	0.396	0.0772937	DS_vs_CTL	MMS22L	1.32057e-05	FALSE	vRG	2.34538	2.12404
2.91192e-06	-0.254046	0.051	0.089	0.0774775	DS_vs_CTL	YIPF3	1.32304e-05	TRUE	vRG	0.271971	0.227917
2.92773e-06	1.09778	0.143	0.094	0.0778982	DS_vs_CTL	AL139317.5	1.32955e-05	TRUE	vRG	0.378835	0.812007
2.92972e-06	0.046989	0.132	0.166	0.077951	DS_vs_CTL	PRPF3	1.32978e-05	FALSE	vRG	0.632702	0.653708
2.94463e-06	-0.838654	0.032	0.077	0.0783477	DS_vs_CTL	ABCC9	1.33587e-05	TRUE	vRG	0.276245	0.154034
2.94944e-06	-0.628203	0.065	0.123	0.0784758	DS_vs_CTL	SYP	1.33738e-05	TRUE	vRG	0.415386	0.268406
2.95985e-06	-0.237135	0.339	0.432	0.0787528	DS_vs_CTL	UTRN	1.34142e-05	FALSE	vRG	2.59251	2.19943
2.96661e-06	0.792937	0.07	0.064	0.0789326	DS_vs_CTL	MRPL39	1.34381e-05	TRUE	vRG	0.191256	0.332156
2.97393e-06	0.623784	0.127	0.115	0.0791273	DS_vs_CTL	UNC80	1.34644e-05	TRUE	vRG	0.393758	0.607332
2.97788e-06	0.177455	0.316	0.343	0.0792324	DS_vs_CTL	NREP	1.34748e-05	FALSE	vRG	1.25519	1.41964
2.97922e-06	-0.577986	0.173	0.263	0.0792681	DS_vs_CTL	WWTR1	1.34748e-05	TRUE	vRG	1.57064	1.05185
2.99527e-06	0.0303104	0.043	0.068	0.0796952	DS_vs_CTL	ANXA1	1.35406e-05	FALSE	vRG	0.216706	0.221355
3.01591e-06	-0.32775	0.058	0.101	0.0802444	DS_vs_CTL	UBE2S	1.36258e-05	TRUE	vRG	0.317102	0.252474
3.01715e-06	-0.23588	0.239	0.317	0.0802774	DS_vs_CTL	RNPC3	1.36258e-05	FALSE	vRG	1.41382	1.20044
3.05066e-06	-0.321517	0.146	0.21	0.0811689	DS_vs_CTL	CENPC	1.37701e-05	TRUE	vRG	0.859985	0.688002
3.05579e-06	-0.649829	0.045	0.09	0.0813053	DS_vs_CTL	AK4	1.37864e-05	TRUE	vRG	0.328488	0.209013
3.05979e-06	-0.270041	0.289	0.38	0.0814118	DS_vs_CTL	FDFT1	1.37919e-05	TRUE	vRG	1.9445	1.61241
3.06009e-06	-0.211838	0.143	0.2	0.0814199	DS_vs_CTL	KLHL25	1.37919e-05	FALSE	vRG	0.811976	0.700973
3.07204e-06	-0.298494	0.262	0.351	0.0817377	DS_vs_CTL	DYNC1H1	1.38388e-05	TRUE	vRG	1.4779	1.20151
3.07797e-06	-0.352167	0.639	0.738	0.0818956	DS_vs_CTL	WSB1	1.38525e-05	TRUE	vRG	5.33885	4.18229
3.07816e-06	0.18893	0.075	0.098	0.0819005	DS_vs_CTL	RHPN1	1.38525e-05	FALSE	vRG	0.289948	0.330688
3.0805e-06	-0.469861	0.108	0.173	0.081963	DS_vs_CTL	PSMA1	1.38561e-05	TRUE	vRG	0.674781	0.486952
3.089e-06	-0.676634	0.16	0.25	0.0821889	DS_vs_CTL	APOLD1	1.38873e-05	TRUE	vRG	1.4346	0.897159
3.0907e-06	-0.150173	0.104	0.157	0.0822343	DS_vs_CTL	PDLIM3	1.38881e-05	FALSE	vRG	0.712058	0.641588
3.09234e-06	-0.622974	0.272	0.376	0.0822779	DS_vs_CTL	EFCAB2	1.38885e-05	TRUE	vRG	2.5308	1.64299
[truncated: 6,979 more rows]

## Sheet: oRG
p_val	avg_log2FC	pct.1	pct.2	p_val_adj	comparison	gene	FDR	sig	celltype	exp.2	exp.1
0	2.70584	0.515	0.099	0	DS_vs_CTL	XIST	0	TRUE	oRG	1.02985	6.71998
0	0.725849	0.935	0.647	0	DS_vs_CTL	TMEM132B	0	TRUE	oRG	11.4776	18.9826
0	0.572498	0.972	0.703	0	DS_vs_CTL	LINC01965	0	TRUE	oRG	22.0453	32.7835
0	0.726244	0.998	0.987	0	DS_vs_CTL	MIR99AHG	0	TRUE	oRG	30.3643	50.2325
4.91335864966915e-315	1.31095	0.741	0.42	1.30729733591747e-310	DS_vs_CTL	KIF26B	9.28624784787468e-312	TRUE	oRG	3.99931	9.92266
1.85076e-277	1.23821	0.536	0.205	4.92431e-273	DS_vs_CTL	UNC5D	2.91494e-274	TRUE	oRG	1.7093	4.0325
6.58743e-274	0.648582	0.955	0.745	1.75272e-269	DS_vs_CTL	GLI3	8.89304e-271	TRUE	oRG	12.0427	18.8786
8.21801e-269	0.628175	0.951	0.706	2.18657e-264	DS_vs_CTL	NRG1	9.70753e-266	TRUE	oRG	34.3432	53.0812
2.37365e-267	3.16985	0.285	0.072	6.31557e-263	DS_vs_CTL	TSHR	2.49233e-264	TRUE	oRG	0.259473	2.33636
1.89708e-263	1.94542	0.475	0.246	5.04757e-259	DS_vs_CTL	2024-12-01	1.79274e-260	TRUE	oRG	1.16724	4.49602
4.07141e-231	-2.43229	0.185	0.423	1.08328e-226	DS_vs_CTL	PID1	3.49771e-228	TRUE	oRG	4.98873	0.924076
1.46674e-212	-1.60171	0.403	0.637	3.90255e-208	DS_vs_CTL	NTM	1.15506e-209	TRUE	oRG	7.07018	2.32937
3.68121e-203	1.21148	0.638	0.498	9.79459e-199	DS_vs_CTL	ELP4	2.67595e-200	TRUE	oRG	2.96316	6.86211
1.15399e-194	1.89785	0.342	0.147	3.07043e-190	DS_vs_CTL	AC007262.2	7.78946e-192	TRUE	oRG	0.639537	2.38367
1.5356e-188	0.673085	0.851	0.615	4.08577e-184	DS_vs_CTL	LTBP1	9.67429e-186	TRUE	oRG	7.08738	11.3007
1.80866e-188	1.00278	0.682	0.451	4.8123e-184	DS_vs_CTL	AC131571.1	1.06824e-185	TRUE	oRG	3.33494	6.68286
8.45436e-185	2.46007	0.245	0.072	2.24945e-180	DS_vs_CTL	AP001172.1	4.69963e-182	TRUE	oRG	0.258288	1.42188
7.37538e-184	0.759415	0.805	0.566	1.96237e-179	DS_vs_CTL	LRRC3B	3.87207e-181	TRUE	oRG	5.76094	9.7522
3.02215e-182	-2.31244	0.138	0.353	8.04104e-178	DS_vs_CTL	PLXDC2	1.50312e-179	TRUE	oRG	3.27921	0.659983
1.69205e-175	1.70885	0.354	0.205	4.50203e-171	DS_vs_CTL	LUCAT1	7.99493e-173	TRUE	oRG	0.88998	2.90966
3.21241e-175	-1.75952	0.809	0.848	8.54726e-171	DS_vs_CTL	DLGAP1	1.44558e-172	TRUE	oRG	41.372	12.2189
2.36407e-173	-1.12299	0.379	0.634	6.29009e-169	DS_vs_CTL	CKB	1.01548e-170	TRUE	oRG	3.36799	1.54624
2.75609e-172	0.638632	0.856	0.635	7.33313e-168	DS_vs_CTL	DOK5	1.13239e-169	TRUE	oRG	6.46132	10.0593
3.56573e-171	0.571323	0.905	0.718	9.48733e-167	DS_vs_CTL	SLC1A3	1.40401e-168	TRUE	oRG	10.0325	14.9072
7.43455e-170	-2.19245	0.139	0.343	1.97811e-165	DS_vs_CTL	PBX3	2.81026e-167	TRUE	oRG	3.00066	0.656301
9.12102e-170	1.01348	0.668	0.445	2.42683e-165	DS_vs_CTL	PITPNC1	3.31514e-167	TRUE	oRG	3.08743	6.23292
9.9708e-169	-1.0812	0.371	0.631	2.65293e-164	DS_vs_CTL	PTMA	3.48978e-166	TRUE	oRG	3.5858	1.69463
1.99051e-166	-1.18633	0.166	0.406	5.29615e-162	DS_vs_CTL	UTY	6.71797e-164	TRUE	oRG	2.06183	0.90586
6.52287e-165	-2.24345	0.097	0.291	1.73554e-160	DS_vs_CTL	NTN1	2.12556e-162	TRUE	oRG	2.7308	0.576505
2.02582e-164	5.34576	0.114	0.005	5.39009e-160	DS_vs_CTL	TSIX	6.38132e-162	TRUE	oRG	0.0129907	0.534657
2.43064e-163	3.12388	0.177	0.035	6.4672e-159	DS_vs_CTL	VCAN-AS1	7.40952e-161	TRUE	oRG	0.126523	1.10413
1.94529e-159	-3.37898	0.05	0.18	5.17583e-155	DS_vs_CTL	CACNA1E	5.74468e-157	TRUE	oRG	1.37718	0.132174
1.60503e-158	-1.97324	0.175	0.387	4.27049e-154	DS_vs_CTL	NTN4	4.59621e-156	TRUE	oRG	3.72045	0.947346
3.34349e-158	-1.04951	0.227	0.476	8.89602e-154	DS_vs_CTL	TTTY14	9.29293e-156	TRUE	oRG	3.25514	1.57252
4.12234e-152	0.958556	0.662	0.451	1.09683e-147	DS_vs_CTL	SLC1A2	1.11303e-149	TRUE	oRG	3.40155	6.61055
8.25576e-152	-1.75064	0.158	0.365	2.19661e-147	DS_vs_CTL	RORB	2.16714e-149	TRUE	oRG	2.48849	0.739335
4.1516e-150	-0.96971	0.205	0.44	1.10462e-145	DS_vs_CTL	NLGN4Y	1.06034e-147	TRUE	oRG	2.59849	1.32667
3.5836e-149	2.13071	0.265	0.104	9.53489e-145	DS_vs_CTL	AC068931.1	8.91185e-147	TRUE	oRG	0.378326	1.65731
4.75581e-148	-1.27222	0.417	0.6	1.26538e-143	DS_vs_CTL	2024-03-01	1.15237e-145	TRUE	oRG	6.2745	2.59762
6.80803e-147	-2.09306	0.119	0.306	1.81141e-142	DS_vs_CTL	RGS6	1.6084e-144	TRUE	oRG	5.09449	1.19388
2.60253e-145	-0.936024	0.461	0.696	6.92456e-141	DS_vs_CTL	ACTG1	5.99852e-143	TRUE	oRG	4.58336	2.39545
3.41658e-145	-0.982433	0.326	0.573	9.0905e-141	DS_vs_CTL	H3F3A	7.68731e-143	TRUE	oRG	2.81622	1.42522
1.96308e-143	-1.05295	0.375	0.607	5.22315e-139	DS_vs_CTL	TMSB4X	4.3142e-141	TRUE	oRG	3.32584	1.60286
5.41937e-143	-1.818	0.16	0.357	1.44193e-138	DS_vs_CTL	BRINP3	1.16393e-140	TRUE	oRG	2.85023	0.808189
1.1399e-142	-1.47042	0.495	0.649	3.03294e-138	DS_vs_CTL	SOX2-OT	2.3938e-140	TRUE	oRG	9.49604	3.42675
1.03379e-141	1.69584	0.312	0.148	2.7506e-137	DS_vs_CTL	AC008957.2	2.12376e-139	TRUE	oRG	0.617654	2.00129
2.93734e-141	-2.23994	0.115	0.248	7.81539e-137	DS_vs_CTL	FLRT2	5.90593e-139	TRUE	oRG	1.69516	0.358672
5.79152e-140	-1.23817	0.336	0.552	1.54095e-135	DS_vs_CTL	PAM	1.14021e-137	TRUE	oRG	4.21469	1.7865
5.88517e-139	0.807831	0.71	0.509	1.56587e-134	DS_vs_CTL	SEL1L3	1.135e-136	TRUE	oRG	4.3958	7.69525
8.98173e-138	-1.18476	0.264	0.497	2.38977e-133	DS_vs_CTL	RPS23	1.69755e-135	TRUE	oRG	2.38538	1.04917
1.22126e-137	-1.6571	0.295	0.458	3.24942e-133	DS_vs_CTL	PRKCE	2.26293e-135	TRUE	oRG	4.60582	1.46023
1.81552e-136	0.668527	0.632	0.392	4.83055e-132	DS_vs_CTL	TMEM132D	3.29936e-134	TRUE	oRG	6.42754	10.2163
1.92132e-136	-2.6652	0.074	0.2	5.11205e-132	DS_vs_CTL	CUX2	3.42575e-134	TRUE	oRG	1.79606	0.282956
3.50323e-135	-1.70294	0.083	0.265	9.32105e-131	DS_vs_CTL	RPS26	6.13066e-133	TRUE	oRG	0.92817	0.284927
2.04085e-134	0.390028	0.993	0.969	5.43009e-130	DS_vs_CTL	ADGRB3	3.50655e-132	TRUE	oRG	31.5473	41.3401
5.14575e-134	0.406448	0.886	0.698	1.36913e-129	DS_vs_CTL	PTPRM	8.68345e-132	TRUE	oRG	10.454	13.8559
1.10945e-132	-1.03855	0.31	0.543	2.95191e-128	DS_vs_CTL	SOX2	1.83935e-130	TRUE	oRG	3.45426	1.68145
3.85945e-131	1.00598	0.509	0.337	1.02688e-126	DS_vs_CTL	PDE9A	6.28825e-129	TRUE	oRG	1.55539	3.12379
8.76894e-131	-0.968601	0.377	0.607	2.33315e-126	DS_vs_CTL	RPL11	1.40452e-128	TRUE	oRG	3.33897	1.70608
1.24903e-130	0.601235	0.832	0.652	3.32331e-126	DS_vs_CTL	CASC15	1.96723e-128	TRUE	oRG	6.15299	9.3342
2.84169e-130	-1.93132	0.144	0.315	7.56087e-126	DS_vs_CTL	PTPRN2	4.40228e-128	TRUE	oRG	1.76221	0.461854
3.46494e-128	0.641417	0.782	0.594	9.21917e-124	DS_vs_CTL	MAST4	5.28124e-126	TRUE	oRG	5.75829	8.98216
4.84268e-128	1.21407	0.424	0.228	1.28849e-123	DS_vs_CTL	KCNMA1	7.26402e-126	TRUE	oRG	1.11199	2.57987
8.36473e-128	-0.737129	0.55	0.757	2.2256e-123	DS_vs_CTL	EEF1A1	1.2351e-125	TRUE	oRG	5.81681	3.48957
1.21951e-127	-1.03472	0.238	0.463	3.24475e-123	DS_vs_CTL	RPS15	1.77298e-125	TRUE	oRG	2.14048	1.04465
3.18669e-127	1.94525	0.272	0.112	8.47882e-123	DS_vs_CTL	AC015923.1	4.56276e-125	TRUE	oRG	0.437663	1.68587
7.3597e-127	0.744166	0.711	0.578	1.9582e-122	DS_vs_CTL	SON	1.03805e-124	TRUE	oRG	3.18534	5.33551
1.4692e-126	3.42881	0.122	0.019	3.90909e-122	DS_vs_CTL	AC008957.1	2.04175e-124	TRUE	oRG	0.0637628	0.688187
9.32241e-125	-1.67521	0.154	0.341	2.48041e-120	DS_vs_CTL	THSD4	1.27677e-122	TRUE	oRG	3.03568	0.950364
1.13727e-123	0.897957	0.574	0.356	3.02594e-119	DS_vs_CTL	LRRC4C	1.53532e-121	TRUE	oRG	2.54965	4.75116
1.77917e-123	0.490706	0.899	0.759	4.73384e-119	DS_vs_CTL	SHROOM3	2.36805e-121	TRUE	oRG	10.3476	14.5398
3.12901e-122	0.658514	0.791	0.642	8.32537e-118	DS_vs_CTL	RALGAPA2	4.10683e-120	TRUE	oRG	5.70771	9.0094
1.18934e-121	-0.855907	0.44	0.662	3.16449e-117	DS_vs_CTL	ACTB	1.53963e-119	TRUE	oRG	3.99294	2.20604
2.54532e-119	0.672991	0.738	0.55	6.77233e-115	DS_vs_CTL	PRKG1	3.25044e-117	TRUE	oRG	4.9731	7.92902
5.5696e-119	1.2106	0.487	0.308	1.4819e-114	DS_vs_CTL	GRIA2	7.0177e-117	TRUE	oRG	1.08786	2.51785
9.23881e-119	0.491402	0.959	0.891	2.45817e-114	DS_vs_CTL	PTPRZ1	1.14877e-116	TRUE	oRG	21.679	30.4766
1.4361e-118	-1.03156	0.305	0.523	3.82104e-114	DS_vs_CTL	RPL41	1.76249e-116	TRUE	oRG	2.69034	1.31592
4.45062e-118	0.716507	0.714	0.549	1.18418e-113	DS_vs_CTL	CDON	5.3921e-116	TRUE	oRG	4.22382	6.94062
1.59209e-115	-1.0285	0.284	0.5	4.23606e-111	DS_vs_CTL	RPS27A	1.90446e-113	TRUE	oRG	2.52104	1.23572
3.5228e-115	0.647541	0.76	0.575	9.37311e-111	DS_vs_CTL	PTPRG	4.16131e-113	TRUE	oRG	6.33286	9.92043
4.08968e-115	-2.56525	0.033	0.163	1.08814e-110	DS_vs_CTL	LMO1	4.77129e-113	TRUE	oRG	0.888768	0.149973
7.31254e-115	-0.678469	0.435	0.656	1.94565e-110	DS_vs_CTL	STMN1	8.42725e-113	TRUE	oRG	3.64323	2.27628
1.15237e-113	-3.83103	0.014	0.117	3.06611e-109	DS_vs_CTL	GREB1L	1.31203e-111	TRUE	oRG	0.751119	0.0525701
1.18381e-113	2.2706	0.186	0.06	3.14976e-109	DS_vs_CTL	AP001021.3	1.33179e-111	TRUE	oRG	0.233707	1.12825
2.15194e-113	2.81691	0.137	0.029	5.72568e-109	DS_vs_CTL	AL138689.2	2.39246e-111	TRUE	oRG	0.104415	0.736685
3.60249e-113	-1.7673	0.164	0.33	9.58515e-109	DS_vs_CTL	AP002989.1	3.95855e-111	TRUE	oRG	3.75928	1.10415
4.19524e-113	-0.791168	0.342	0.56	1.11623e-108	DS_vs_CTL	RPL13	4.55689e-111	TRUE	oRG	2.78507	1.6093
3.68936e-112	-1.63365	0.15	0.321	9.81628e-108	DS_vs_CTL	ZNF536	3.96187e-110	TRUE	oRG	2.45834	0.792084
[truncated: 9,362 more rows]

## Sheet: IP
p_val	avg_log2FC	pct.1	pct.2	p_val_adj	comparison	gene	FDR	sig	celltype	exp.2	exp.1
[truncated: 8,228 more rows]

## Sheet: Microglia_1
p_val	avg_log2FC	pct.1	pct.2	p_val_adj	comparison	gene	FDR	sig	celltype	exp.2	exp.1
[truncated: 9,477 more rows]

[truncated: 16 more sheets: Cycling_progenitors, Layer_5-6_ExN, OPC_1, Interneuron_3, Layer_4-6_ExN, Vascular_2, Interneuron_1, Mig_Layer_2-4_ExN, Interneuron_2, Astrocyte_progenitors, Layer_2-4_ExN, Mig_Layer_2-3_ExN, Layer_4-5_ExN, Interneuron_4, OL, Vascular_1]
