# Supplementary material for: Molecular Cartography of the Human and Mouse Down Syndrome Brain
Source: Research Square preprint supplement (doi:10.21203/rs.3.rs-5374449/v1), 2024-11-14
Supplement: Supplementary file 5 [file 7ae887e8312fc3a28960dac5.xlsx]

## Sheet: snRNA-seq
Sample ID	Embryo ID	Karyotype	Condition	Developmental Stage
Single_nucleus_CTL_1	13103	rsa(13,15,16,18,21,22)x2,(X,Y)x1	Control	19pcw
Single_nucleus_CTL_2	13147	rsa(13,15,16,18,21,22)x2,(X,Y)x1	Control	18pcw
Single_nucleus_CTL_3	13423	rsa(13,15,16,18,21,22,X)x2	Control	17pcw
Single_nucleus_CTL_4	13452	rsa(13,15,16,18,21,22)x2,(X,Y)x1	Control	13pcw
Single_nucleus_CTL_5	13587	rsa(13,15,16,18,21,22)x2,(X,Y)x1	Control	15pcw
Single_nucleus_DS_1	16398	rsa(13,15,16,18)x2,(21)x3,(22,X)x2	Trisomy 21	15pcw
Single_nucleus_DS_2	16434	rsa(13,15,16,18)x2,(21)x3,(22)x2,(X,Y)x1	Trisomy 21	17pcw
Single_nucleus_DS_3	16493	rsa(13,15,16,18)x2,(21)x3,(22)x2,(X,Y)x1	Trisomy 21	13pcw
Single_nucleus_DS_4	17602	rsa(13,15,16,18)x2,(21)x3,(22)x2,(X,Y)x1	Trisomy 21	15pcw
Single_nucleus_DS_5	17615	rsa(13,15,16,18)x2,(21)x3,(22)x2,(X,Y)x1	Trisomy 21	15 pcw

## Sheet: Slide-Seq
Sample ID	Embryo ID	Karyotype	Condition	Developmental Stage
Slide_seq_CTL_1	18030	rsa(13,15,16,18,21,22)x2,(X,Y)x1	Control	15 pcw
Slide_seq_CTL_2	16419	rsa(13,15,16,18,21,22,X)x2	Control	18pcw
Slide_seq_CTL_3	18053	rsa(13,15,16,18,21,22,X)x2	Control	13pcw
Slide_seq_DS_1	16322	rsa(13,15,16,18)x2,(21)x3,(22,X)x2	Trisomy 21	15pcw
Slide_seq_DS_2	17979	rsa(13,15,16,18)x2,(21)x3,(22)x2(X,Y),1	Trisomy 21	16pcw
Slide_seq_DS_3	17992	rsa(13,15,16,18)x2,(21)x3,(22,X)x2	Trisomy 21	14pcw

## Sheet: Proteomics
Sample ID	Embryo ID	Karyotype	Condition	Developmental Stage
Control	13423	rsa(13,15,16,18,21,22,X)x2	Control	17pcw
Control	13452	rsa(13,15,16,18,21,22)x2,(X,Y)x1	Control	13pcw
Control	15895	rsa(13,15,16,18,21,22)x2,(X,Y)x1	Control	15pcw
Control	13587	rsa(13,15,16,18,21,22)x2,(X,Y)x1	Control	15pcw
DS	16398	rsa(13,15,16,18)x2,(21)x3,(22,X)x2	Trisomy 21	15pcw
DS	17615	rsa(13,15,16,18)x2,(21)x3,(22)x2,(X,Y)x1	Trisomy 21	15pcw
DS	16558	rsa(13,15,16,18)x2,(21)x3,(22,X)x2	Trisomy 21	15pcw
