# Supplementary material for: Molecular Cartography of the Human and Mouse Down Syndrome Brain
Source: Research Square preprint supplement (doi:10.21203/rs.3.rs-5374449/v1), 2024-11-14
Supplement: Supplementary file 6 [file 9a468416c8438d69db29a7c0.xlsx]

## Sheet: Upregulated in DS
	source	target	ligand	receptor	prob	pval	interaction_name	interaction_name_2	pathway_name	annotation	evidence	datasets	ligand.logFC	ligand.pct.1	ligand.pct.2	ligand.pvalues	receptor.logFC	receptor.pct.1	receptor.pct.2	receptor.pvalues
1	Astrocyte_progenitors	Layer_4-5_ExN	BMP7	ACVR1_ACVR2A	3.79414e-07	0	BMP7_ACVR1_ACVR2A	BMP7 - (ACVR1+ACVR2A)	BMP	Secreted Signaling	KEGG: hsa04350; PMID:26893264	LS	0.144643	40.4762	31.0798	2.79431e-12	NA	NA	NA	NA
2	Astrocyte_progenitors	Layer_2-4_ExN	BMP7	ACVR1_ACVR2A	2.48583e-07	0	BMP7_ACVR1_ACVR2A	BMP7 - (ACVR1+ACVR2A)	BMP	Secreted Signaling	KEGG: hsa04350; PMID:26893264	LS	0.144643	40.4762	31.0798	2.79431e-12	0.107161	40.4083	34.2941	2.42409e-10
3	Astrocyte_progenitors	Smooth_muscle_2	BMP7	ACVR1_ACVR2A	4.1816e-07	0	BMP7_ACVR1_ACVR2A	BMP7 - (ACVR1+ACVR2A)	BMP	Secreted Signaling	KEGG: hsa04350; PMID:26893264	LS	0.144643	40.4762	31.0798	2.79431e-12	-1.93618	46.1806	59.8101	0.0245882
4	Astrocyte_progenitors	oRG	BMP7	ACVR1_BMPR2	5.04248e-07	0	BMP7_ACVR1_BMPR2	BMP7 - (ACVR1+BMPR2)	BMP	Secreted Signaling	KEGG: hsa04350; PMID:26893264	LS	0.144643	40.4762	31.0798	2.79431e-12	NA	NA	NA	NA
5	Astrocyte_progenitors	Interneuron_1	BMP7	ACVR1_BMPR2	5.28321e-07	0	BMP7_ACVR1_BMPR2	BMP7 - (ACVR1+BMPR2)	BMP	Secreted Signaling	KEGG: hsa04350; PMID:26893264	LS	0.144643	40.4762	31.0798	2.79431e-12	0.123348	32.4464	23.5701	4.19676e-13
6	Astrocyte_progenitors	Interneuron_3	BMP7	ACVR1_BMPR2	5.22278e-07	0	BMP7_ACVR1_BMPR2	BMP7 - (ACVR1+BMPR2)	BMP	Secreted Signaling	KEGG: hsa04350; PMID:26893264	LS	0.144643	40.4762	31.0798	2.79431e-12	-0.214859	36.2733	42.2847	1.40971e-05
7	Astrocyte_progenitors	Layer_4-5_ExN	BMP7	ACVR1_BMPR2	8.864e-07	0	BMP7_ACVR1_BMPR2	BMP7 - (ACVR1+BMPR2)	BMP	Secreted Signaling	KEGG: hsa04350; PMID:26893264	LS	0.144643	40.4762	31.0798	2.79431e-12	-0.914366	90.7301	92.8717	0.00209822
8	Astrocyte_progenitors	Layer_2-4_ExN	BMP7	ACVR1_BMPR2	7.79289e-07	0	BMP7_ACVR1_BMPR2	BMP7 - (ACVR1+BMPR2)	BMP	Secreted Signaling	KEGG: hsa04350; PMID:26893264	LS	0.144643	40.4762	31.0798	2.79431e-12	-0.168224	64.6779	61.1138	1.31663e-10
9	Astrocyte_progenitors	Smooth_muscle_2	BMP7	ACVR1_BMPR2	2.41724e-06	0	BMP7_ACVR1_BMPR2	BMP7 - (ACVR1+BMPR2)	BMP	Secreted Signaling	KEGG: hsa04350; PMID:26893264	LS	0.144643	40.4762	31.0798	2.79431e-12	-4.69856	75	84.8101	4.98317e-05
10	Astrocyte_progenitors	Layer_4-6_ExN	BMP7	BMPR1A_ACVR2A	4.68491e-07	0	BMP7_BMPR1A_ACVR2A	BMP7 - (BMPR1A+ACVR2A)	BMP	Secreted Signaling	KEGG: hsa04350; PMID:26893264	LS	0.144643	40.4762	31.0798	2.79431e-12	0.0980393	36.8351	29.7317	1.12169e-08
11	Astrocyte_progenitors	IP	BMP7	BMPR1A_ACVR2A	2.54274e-07	0	BMP7_BMPR1A_ACVR2A	BMP7 - (BMPR1A+ACVR2A)	BMP	Secreted Signaling	KEGG: hsa04350; PMID:26893264	LS	0.144643	40.4762	31.0798	2.79431e-12	-0.0607339	31.7331	33.6061	0.000425592
12	Astrocyte_progenitors	Interneuron_M2	BMP7	BMPR1A_ACVR2A	2.3429e-07	0	BMP7_BMPR1A_ACVR2A	BMP7 - (BMPR1A+ACVR2A)	BMP	Secreted Signaling	KEGG: hsa04350; PMID:26893264	LS	0.144643	40.4762	31.0798	2.79431e-12	-0.0342355	31.7361	31.4477	0.00349245
13	Astrocyte_progenitors	Layer_5-6_ExN	BMP7	BMPR1A_ACVR2A	4.12996e-07	0	BMP7_BMPR1A_ACVR2A	BMP7 - (BMPR1A+ACVR2A)	BMP	Secreted Signaling	KEGG: hsa04350; PMID:26893264	LS	0.144643	40.4762	31.0798	2.79431e-12	0.100601	40.6748	35.8269	1.19142e-05
14	Astrocyte_progenitors	Interneuron_M1	BMP7	BMPR1A_ACVR2A	4.87272e-07	0	BMP7_BMPR1A_ACVR2A	BMP7 - (BMPR1A+ACVR2A)	BMP	Secreted Signaling	KEGG: hsa04350; PMID:26893264	LS	0.144643	40.4762	31.0798	2.79431e-12	0.156635	49.7664	46.2656	4.34594e-06
15	Astrocyte_progenitors	Mig_Layer_2-4_ExN	BMP7	BMPR1A_ACVR2A	4.2808e-07	0	BMP7_BMPR1A_ACVR2A	BMP7 - (BMPR1A+ACVR2A)	BMP	Secreted Signaling	KEGG: hsa04350; PMID:26893264	LS	0.144643	40.4762	31.0798	2.79431e-12	NA	NA	NA	NA
16	Astrocyte_progenitors	OPC_1	BMP7	BMPR1A_ACVR2A	4.11258e-07	0	BMP7_BMPR1A_ACVR2A	BMP7 - (BMPR1A+ACVR2A)	BMP	Secreted Signaling	KEGG: hsa04350; PMID:26893264	LS	0.144643	40.4762	31.0798	2.79431e-12	NA	NA	NA	NA
17	Astrocyte_progenitors	Layer_4-5_ExN	BMP7	BMPR1A_ACVR2A	7.69383e-07	0	BMP7_BMPR1A_ACVR2A	BMP7 - (BMPR1A+ACVR2A)	BMP	Secreted Signaling	KEGG: hsa04350; PMID:26893264	LS	0.144643	40.4762	31.0798	2.79431e-12	NA	NA	NA	NA
18	Astrocyte_progenitors	Cycling_progenitors	BMP7	BMPR1A_ACVR2A	4.19602e-07	0	BMP7_BMPR1A_ACVR2A	BMP7 - (BMPR1A+ACVR2A)	BMP	Secreted Signaling	KEGG: hsa04350; PMID:26893264	LS	0.144643	40.4762	31.0798	2.79431e-12	NA	NA	NA	NA
19	Astrocyte_progenitors	Layer_2-4_ExN	BMP7	BMPR1A_ACVR2A	3.97841e-07	0	BMP7_BMPR1A_ACVR2A	BMP7 - (BMPR1A+ACVR2A)	BMP	Secreted Signaling	KEGG: hsa04350; PMID:26893264	LS	0.144643	40.4762	31.0798	2.79431e-12	NA	NA	NA	NA
20	Astrocyte_progenitors	Interneuron_4	BMP7	BMPR1A_ACVR2A	4.07059e-07	0	BMP7_BMPR1A_ACVR2A	BMP7 - (BMPR1A+ACVR2A)	BMP	Secreted Signaling	KEGG: hsa04350; PMID:26893264	LS	0.144643	40.4762	31.0798	2.79431e-12	0.179141	45.3782	31.5068	0.0397691
21	Astrocyte_progenitors	Smooth_muscle_2	BMP7	BMPR1A_ACVR2A	1.24048e-07	0	BMP7_BMPR1A_ACVR2A	BMP7 - (BMPR1A+ACVR2A)	BMP	Secreted Signaling	KEGG: hsa04350; PMID:26893264	LS	0.144643	40.4762	31.0798	2.79431e-12	-0.3256	29.1667	39.2405	0.0491764
22	Astrocyte_progenitors	Interneuron_S2	BMP7	BMPR1A_ACVR2A	1.03403e-06	0	BMP7_BMPR1A_ACVR2A	BMP7 - (BMPR1A+ACVR2A)	BMP	Secreted Signaling	KEGG: hsa04350; PMID:26893264	LS	0.144643	40.4762	31.0798	2.79431e-12	0.2591	58.8596	51.4667	1.8893e-05
23	Astrocyte_progenitors	OL	BMP7	BMPR1A_ACVR2A	2.48724e-07	0	BMP7_BMPR1A_ACVR2A	BMP7 - (BMPR1A+ACVR2A)	BMP	Secreted Signaling	KEGG: hsa04350; PMID:26893264	LS	0.144643	40.4762	31.0798	2.79431e-12	NA	NA	NA	NA
24	Astrocyte_progenitors	Layer_4-6_ExN	BMP7	BMPR1A_BMPR2	1.44531e-06	0	BMP7_BMPR1A_BMPR2	BMP7 - (BMPR1A+BMPR2)	BMP	Secreted Signaling	KEGG: hsa04350; PMID:26893264	LS	0.144643	40.4762	31.0798	2.79431e-12	NA	NA	NA	NA
25	Astrocyte_progenitors	oRG	BMP7	BMPR1A_BMPR2	5.178e-07	0	BMP7_BMPR1A_BMPR2	BMP7 - (BMPR1A+BMPR2)	BMP	Secreted Signaling	KEGG: hsa04350; PMID:26893264	LS	0.144643	40.4762	31.0798	2.79431e-12	NA	NA	NA	NA
26	Astrocyte_progenitors	IP	BMP7	BMPR1A_BMPR2	5.11873e-07	0	BMP7_BMPR1A_BMPR2	BMP7 - (BMPR1A+BMPR2)	BMP	Secreted Signaling	KEGG: hsa04350; PMID:26893264	LS	0.144643	40.4762	31.0798	2.79431e-12	-0.0628088	67.0057	65.5611	0.0296728
27	Astrocyte_progenitors	Mig_Layer_2-3_ExN	BMP7	BMPR1A_BMPR2	5.20243e-07	0	BMP7_BMPR1A_BMPR2	BMP7 - (BMPR1A+BMPR2)	BMP	Secreted Signaling	KEGG: hsa04350; PMID:26893264	LS	0.144643	40.4762	31.0798	2.79431e-12	-0.102187	73.6973	73.6329	1.39706e-12
28	Astrocyte_progenitors	Interneuron_2	BMP7	BMPR1A_BMPR2	5.12724e-07	0	BMP7_BMPR1A_BMPR2	BMP7 - (BMPR1A+BMPR2)	BMP	Secreted Signaling	KEGG: hsa04350; PMID:26893264	LS	0.144643	40.4762	31.0798	2.79431e-12	0.0524105	39.461	36.2107	0.0101563
29	Astrocyte_progenitors	Interneuron_M2	BMP7	BMPR1A_BMPR2	5.99637e-07	0	BMP7_BMPR1A_BMPR2	BMP7 - (BMPR1A+BMPR2)	BMP	Secreted Signaling	KEGG: hsa04350; PMID:26893264	LS	0.144643	40.4762	31.0798	2.79431e-12	0.119831	56.1806	50	0.000868582
30	Astrocyte_progenitors	IP_IN	BMP7	BMPR1A_BMPR2	5.34806e-07	0	BMP7_BMPR1A_BMPR2	BMP7 - (BMPR1A+BMPR2)	BMP	Secreted Signaling	KEGG: hsa04350; PMID:26893264	LS	0.144643	40.4762	31.0798	2.79431e-12	NA	NA	NA	NA
31	Astrocyte_progenitors	Layer_5-6_ExN	BMP7	BMPR1A_BMPR2	1.13873e-06	0	BMP7_BMPR1A_BMPR2	BMP7 - (BMPR1A+BMPR2)	BMP	Secreted Signaling	KEGG: hsa04350; PMID:26893264	LS	0.144643	40.4762	31.0798	2.79431e-12	-0.442913	81.135	83.4983	7.36289e-10
32	Astrocyte_progenitors	Interneuron_3	BMP7	BMPR1A_BMPR2	5.03182e-07	0	BMP7_BMPR1A_BMPR2	BMP7 - (BMPR1A+BMPR2)	BMP	Secreted Signaling	KEGG: hsa04350; PMID:26893264	LS	0.144643	40.4762	31.0798	2.79431e-12	NA	NA	NA	NA
33	Astrocyte_progenitors	Interneuron_M1	BMP7	BMPR1A_BMPR2	7.11777e-07	0	BMP7_BMPR1A_BMPR2	BMP7 - (BMPR1A+BMPR2)	BMP	Secreted Signaling	KEGG: hsa04350; PMID:26893264	LS	0.144643	40.4762	31.0798	2.79431e-12	0.156635	49.7664	46.2656	4.34594e-06
34	Astrocyte_progenitors	Mig_Layer_2-4_ExN	BMP7	BMPR1A_BMPR2	1.31393e-06	0	BMP7_BMPR1A_BMPR2	BMP7 - (BMPR1A+BMPR2)	BMP	Secreted Signaling	KEGG: hsa04350; PMID:26893264	LS	0.144643	40.4762	31.0798	2.79431e-12	NA	NA	NA	NA
35	Astrocyte_progenitors	OPC_1	BMP7	BMPR1A_BMPR2	8.24352e-07	0	BMP7_BMPR1A_BMPR2	BMP7 - (BMPR1A+BMPR2)	BMP	Secreted Signaling	KEGG: hsa04350; PMID:26893264	LS	0.144643	40.4762	31.0798	2.79431e-12	NA	NA	NA	NA
36	Astrocyte_progenitors	Layer_4-5_ExN	BMP7	BMPR1A_BMPR2	1.79746e-06	0	BMP7_BMPR1A_BMPR2	BMP7 - (BMPR1A+BMPR2)	BMP	Secreted Signaling	KEGG: hsa04350; PMID:26893264	LS	0.144643	40.4762	31.0798	2.79431e-12	-0.914366	90.7301	92.8717	0.00209822
37	Astrocyte_progenitors	Interneuron_S1	BMP7	BMPR1A_BMPR2	5.24437e-07	0	BMP7_BMPR1A_BMPR2	BMP7 - (BMPR1A+BMPR2)	BMP	Secreted Signaling	KEGG: hsa04350; PMID:26893264	LS	0.144643	40.4762	31.0798	2.79431e-12	NA	NA	NA	NA
38	Astrocyte_progenitors	vRG	BMP7	BMPR1A_BMPR2	5.18873e-07	0	BMP7_BMPR1A_BMPR2	BMP7 - (BMPR1A+BMPR2)	BMP	Secreted Signaling	KEGG: hsa04350; PMID:26893264	LS	0.144643	40.4762	31.0798	2.79431e-12	-0.288895	72.3684	76.556	0.00201472
39	Astrocyte_progenitors	Cycling_progenitors	BMP7	BMPR1A_BMPR2	1.13418e-06	0	BMP7_BMPR1A_BMPR2	BMP7 - (BMPR1A+BMPR2)	BMP	Secreted Signaling	KEGG: hsa04350; PMID:26893264	LS	0.144643	40.4762	31.0798	2.79431e-12	NA	NA	NA	NA
40	Astrocyte_progenitors	Layer_2-4_ExN	BMP7	BMPR1A_BMPR2	1.2472e-06	0	BMP7_BMPR1A_BMPR2	BMP7 - (BMPR1A+BMPR2)	BMP	Secreted Signaling	KEGG: hsa04350; PMID:26893264	LS	0.144643	40.4762	31.0798	2.79431e-12	-0.443609	88.9476	87.9336	2.09167e-11
41	Astrocyte_progenitors	Interneuron_4	BMP7	BMPR1A_BMPR2	7.26136e-07	0	BMP7_BMPR1A_BMPR2	BMP7 - (BMPR1A+BMPR2)	BMP	Secreted Signaling	KEGG: hsa04350; PMID:26893264	LS	0.144643	40.4762	31.0798	2.79431e-12	0.293078	63.4454	50.6849	0.0406838
42	Astrocyte_progenitors	Astrocyte_progenitors	BMP7	BMPR1A_BMPR2	1.05669e-06	0	BMP7_BMPR1A_BMPR2	BMP7 - (BMPR1A+BMPR2)	BMP	Secreted Signaling	KEGG: hsa04350; PMID:26893264	LS	0.144643	40.4762	31.0798	2.79431e-12	NA	NA	NA	NA
43	Astrocyte_progenitors	Smooth_muscle_2	BMP7	BMPR1A_BMPR2	7.17083e-07	0	BMP7_BMPR1A_BMPR2	BMP7 - (BMPR1A+BMPR2)	BMP	Secreted Signaling	KEGG: hsa04350; PMID:26893264	LS	0.144643	40.4762	31.0798	2.79431e-12	-5.85036	86.8056	89.2405	9.96614e-05
44	Astrocyte_progenitors	Microglia_1	BMP7	BMPR1A_BMPR2	5.05654e-07	0	BMP7_BMPR1A_BMPR2	BMP7 - (BMPR1A+BMPR2)	BMP	Secreted Signaling	KEGG: hsa04350; PMID:26893264	LS	0.144643	40.4762	31.0798	2.79431e-12	NA	NA	NA	NA
45	Astrocyte_progenitors	Smooth_muscle_1	BMP7	BMPR1A_BMPR2	5.85435e-07	0	BMP7_BMPR1A_BMPR2	BMP7 - (BMPR1A+BMPR2)	BMP	Secreted Signaling	KEGG: hsa04350; PMID:26893264	LS	0.144643	40.4762	31.0798	2.79431e-12	NA	NA	NA	NA
46	Astrocyte_progenitors	Interneuron_S2	BMP7	BMPR1A_BMPR2	1.87768e-06	0	BMP7_BMPR1A_BMPR2	BMP7 - (BMPR1A+BMPR2)	BMP	Secreted Signaling	KEGG: hsa04350; PMID:26893264	LS	0.144643	40.4762	31.0798	2.79431e-12	0.905495	75.307	65.2	9.39913e-13
47	Astrocyte_progenitors	OL	BMP7	BMPR1A_BMPR2	5.13399e-07	0	BMP7_BMPR1A_BMPR2	BMP7 - (BMPR1A+BMPR2)	BMP	Secreted Signaling	KEGG: hsa04350; PMID:26893264	LS	0.144643	40.4762	31.0798	2.79431e-12	NA	NA	NA	NA
48	Astrocyte_progenitors	oRG	BMP7	BMPR1B_BMPR2	5.26114e-07	0	BMP7_BMPR1B_BMPR2	BMP7 - (BMPR1B+BMPR2)	BMP	Secreted Signaling	KEGG: hsa04350; PMID:26893264	LS	0.144643	40.4762	31.0798	2.79431e-12	-0.0849975	37.2476	38.0875	0.000432137
49	Astrocyte_progenitors	vRG	BMP7	BMPR1B_BMPR2	5.31764e-07	0	BMP7_BMPR1B_BMPR2	BMP7 - (BMPR1B+BMPR2)	BMP	Secreted Signaling	KEGG: hsa04350; PMID:26893264	LS	0.144643	40.4762	31.0798	2.79431e-12	-0.288895	72.3684	76.556	0.00201472
50	Astrocyte_progenitors	Astrocyte_progenitors	BMP7	BMPR1B_BMPR2	1.0737e-06	0	BMP7_BMPR1B_BMPR2	BMP7 - (BMPR1B+BMPR2)	BMP	Secreted Signaling	KEGG: hsa04350; PMID:26893264	LS	0.144643	40.4762	31.0798	2.79431e-12	-1.61559	67.0387	79.6244	4.65447e-26
51	Layer_2-4_ExN	Layer_4-6_ExN	WNT5B	FZD3	7.50403e-07	0	WNT5B_FZD3	WNT5B - FZD3	ncWNT	Secreted Signaling	KEGG: hsa04310	LS	0.103006	54.3471	51.0503	0.000115254	-0.10973	31.7553	36.8982	4.03139e-07
52	Interneuron_M2	oRG	WNT5B	FZD3	2.31099e-07	0	WNT5B_FZD3	WNT5B - FZD3	ncWNT	Secreted Signaling	KEGG: hsa04310	LS	0.255311	33.0556	15.2068	9.95681e-22	NA	NA	NA	NA
53	Interneuron_M1	oRG	WNT5B	FZD3	2.29961e-07	0	WNT5B_FZD3	WNT5B - FZD3	ncWNT	Secreted Signaling	KEGG: hsa04310	LS	0.318663	33.6449	14.4191	2.19463e-29	NA	NA	NA	NA
54	Layer_2-4_ExN	oRG	WNT5B	FZD3	9.00604e-07	0	WNT5B_FZD3	WNT5B - FZD3	ncWNT	Secreted Signaling	KEGG: hsa04310	LS	0.103006	54.3471	51.0503	0.000115254	NA	NA	NA	NA
55	Interneuron_M2	IP	WNT5B	FZD3	2.27683e-07	0	WNT5B_FZD3	WNT5B - FZD3	ncWNT	Secreted Signaling	KEGG: hsa04310	LS	0.255311	33.0556	15.2068	9.95681e-22	NA	NA	NA	NA
56	Interneuron_M1	IP	WNT5B	FZD3	2.26561e-07	0	WNT5B_FZD3	WNT5B - FZD3	ncWNT	Secreted Signaling	KEGG: hsa04310	LS	0.318663	33.6449	14.4191	2.19463e-29	NA	NA	NA	NA
57	Layer_2-4_ExN	IP	WNT5B	FZD3	8.8729e-07	0	WNT5B_FZD3	WNT5B - FZD3	ncWNT	Secreted Signaling	KEGG: hsa04310	LS	0.103006	54.3471	51.0503	0.000115254	NA	NA	NA	NA
58	Interneuron_M2	Mig_Layer_2-3_ExN	WNT5B	FZD3	2.10799e-07	0	WNT5B_FZD3	WNT5B - FZD3	ncWNT	Secreted Signaling	KEGG: hsa04310	LS	0.255311	33.0556	15.2068	9.95681e-22	NA	NA	NA	NA
59	Interneuron_M1	Mig_Layer_2-3_ExN	WNT5B	FZD3	2.09761e-07	0	WNT5B_FZD3	WNT5B - FZD3	ncWNT	Secreted Signaling	KEGG: hsa04310	LS	0.318663	33.6449	14.4191	2.19463e-29	NA	NA	NA	NA
60	Layer_2-4_ExN	Mig_Layer_2-3_ExN	WNT5B	FZD3	8.21493e-07	0	WNT5B_FZD3	WNT5B - FZD3	ncWNT	Secreted Signaling	KEGG: hsa04310	LS	0.103006	54.3471	51.0503	0.000115254	NA	NA	NA	NA
61	Interneuron_M2	Interneuron_M2	WNT5B	FZD3	6.55286e-07	0	WNT5B_FZD3	WNT5B - FZD3	ncWNT	Secreted Signaling	KEGG: hsa04310	LS	0.255311	33.0556	15.2068	9.95681e-22	0.276669	51.1111	39.9027	3.04391e-16
62	Interneuron_M1	Interneuron_M2	WNT5B	FZD3	6.52058e-07	0	WNT5B_FZD3	WNT5B - FZD3	ncWNT	Secreted Signaling	KEGG: hsa04310	LS	0.318663	33.6449	14.4191	2.19463e-29	0.276669	51.1111	39.9027	3.04391e-16
63	Layer_2-4_ExN	Interneuron_M2	WNT5B	FZD3	2.55367e-06	0	WNT5B_FZD3	WNT5B - FZD3	ncWNT	Secreted Signaling	KEGG: hsa04310	LS	0.103006	54.3471	51.0503	0.000115254	0.276669	51.1111	39.9027	3.04391e-16
64	Interneuron_M2	IP_IN	WNT5B	FZD3	2.46463e-07	0	WNT5B_FZD3	WNT5B - FZD3	ncWNT	Secreted Signaling	KEGG: hsa04310	LS	0.255311	33.0556	15.2068	9.95681e-22	NA	NA	NA	NA
65	Interneuron_M1	IP_IN	WNT5B	FZD3	2.45249e-07	0	WNT5B_FZD3	WNT5B - FZD3	ncWNT	Secreted Signaling	KEGG: hsa04310	LS	0.318663	33.6449	14.4191	2.19463e-29	NA	NA	NA	NA
66	Layer_2-4_ExN	IP_IN	WNT5B	FZD3	9.60477e-07	0	WNT5B_FZD3	WNT5B - FZD3	ncWNT	Secreted Signaling	KEGG: hsa04310	LS	0.103006	54.3471	51.0503	0.000115254	NA	NA	NA	NA
67	Interneuron_M2	Layer_5-6_ExN	WNT5B	FZD3	2.20029e-07	0	WNT5B_FZD3	WNT5B - FZD3	ncWNT	Secreted Signaling	KEGG: hsa04310	LS	0.255311	33.0556	15.2068	9.95681e-22	-0.13366	38.8037	45.3612	6.73879e-08
68	Interneuron_M1	Layer_5-6_ExN	WNT5B	FZD3	2.18945e-07	0	WNT5B_FZD3	WNT5B - FZD3	ncWNT	Secreted Signaling	KEGG: hsa04310	LS	0.318663	33.6449	14.4191	2.19463e-29	-0.13366	38.8037	45.3612	6.73879e-08
69	Layer_2-4_ExN	Layer_5-6_ExN	WNT5B	FZD3	8.5746e-07	0	WNT5B_FZD3	WNT5B - FZD3	ncWNT	Secreted Signaling	KEGG: hsa04310	LS	0.103006	54.3471	51.0503	0.000115254	-0.13366	38.8037	45.3612	6.73879e-08
70	Interneuron_M2	Interneuron_M1	WNT5B	FZD3	6.77214e-07	0	WNT5B_FZD3	WNT5B - FZD3	ncWNT	Secreted Signaling	KEGG: hsa04310	LS	0.255311	33.0556	15.2068	9.95681e-22	0.124714	52.8037	49.1701	5.6918e-08
71	Interneuron_M1	Interneuron_M1	WNT5B	FZD3	6.73878e-07	0	WNT5B_FZD3	WNT5B - FZD3	ncWNT	Secreted Signaling	KEGG: hsa04310	LS	0.318663	33.6449	14.4191	2.19463e-29	0.124714	52.8037	49.1701	5.6918e-08
72	Layer_2-4_ExN	Interneuron_M1	WNT5B	FZD3	2.63913e-06	0	WNT5B_FZD3	WNT5B - FZD3	ncWNT	Secreted Signaling	KEGG: hsa04310	LS	0.103006	54.3471	51.0503	0.000115254	0.124714	52.8037	49.1701	5.6918e-08
73	Interneuron_M2	Mig_Layer_2-4_ExN	WNT5B	FZD3	2.32873e-07	0	WNT5B_FZD3	WNT5B - FZD3	ncWNT	Secreted Signaling	KEGG: hsa04310	LS	0.255311	33.0556	15.2068	9.95681e-22	0.0506891	40.7791	39.0099	0.00412694
74	Interneuron_M1	Mig_Layer_2-4_ExN	WNT5B	FZD3	2.31725e-07	0	WNT5B_FZD3	WNT5B - FZD3	ncWNT	Secreted Signaling	KEGG: hsa04310	LS	0.318663	33.6449	14.4191	2.19463e-29	0.0506891	40.7791	39.0099	0.00412694
75	Layer_2-4_ExN	Mig_Layer_2-4_ExN	WNT5B	FZD3	9.07514e-07	0	WNT5B_FZD3	WNT5B - FZD3	ncWNT	Secreted Signaling	KEGG: hsa04310	LS	0.103006	54.3471	51.0503	0.000115254	0.0506891	40.7791	39.0099	0.00412694
76	Interneuron_M2	Layer_4-5_ExN	WNT5B	FZD3	2.34465e-07	0	WNT5B_FZD3	WNT5B - FZD3	ncWNT	Secreted Signaling	KEGG: hsa04310	LS	0.255311	33.0556	15.2068	9.95681e-22	NA	NA	NA	NA
77	Interneuron_M1	Layer_4-5_ExN	WNT5B	FZD3	2.3331e-07	0	WNT5B_FZD3	WNT5B - FZD3	ncWNT	Secreted Signaling	KEGG: hsa04310	LS	0.318663	33.6449	14.4191	2.19463e-29	NA	NA	NA	NA
78	Layer_2-4_ExN	Layer_4-5_ExN	WNT5B	FZD3	9.13721e-07	0	WNT5B_FZD3	WNT5B - FZD3	ncWNT	Secreted Signaling	KEGG: hsa04310	LS	0.103006	54.3471	51.0503	0.000115254	NA	NA	NA	NA
79	Interneuron_M2	Interneuron_S1	WNT5B	FZD3	2.25071e-07	0	WNT5B_FZD3	WNT5B - FZD3	ncWNT	Secreted Signaling	KEGG: hsa04310	LS	0.255311	33.0556	15.2068	9.95681e-22	NA	NA	NA	NA
80	Interneuron_M1	Interneuron_S1	WNT5B	FZD3	2.23962e-07	0	WNT5B_FZD3	WNT5B - FZD3	ncWNT	Secreted Signaling	KEGG: hsa04310	LS	0.318663	33.6449	14.4191	2.19463e-29	NA	NA	NA	NA
81	Layer_2-4_ExN	Interneuron_S1	WNT5B	FZD3	8.7711e-07	0	WNT5B_FZD3	WNT5B - FZD3	ncWNT	Secreted Signaling	KEGG: hsa04310	LS	0.103006	54.3471	51.0503	0.000115254	NA	NA	NA	NA
82	Interneuron_M2	vRG	WNT5B	FZD3	2.23172e-07	0	WNT5B_FZD3	WNT5B - FZD3	ncWNT	Secreted Signaling	KEGG: hsa04310	LS	0.255311	33.0556	15.2068	9.95681e-22	-0.15831	28.8462	38.3817	1.7765e-05
83	Interneuron_M1	vRG	WNT5B	FZD3	2.22072e-07	0	WNT5B_FZD3	WNT5B - FZD3	ncWNT	Secreted Signaling	KEGG: hsa04310	LS	0.318663	33.6449	14.4191	2.19463e-29	-0.15831	28.8462	38.3817	1.7765e-05
84	Layer_2-4_ExN	vRG	WNT5B	FZD3	8.6971e-07	0	WNT5B_FZD3	WNT5B - FZD3	ncWNT	Secreted Signaling	KEGG: hsa04310	LS	0.103006	54.3471	51.0503	0.000115254	-0.15831	28.8462	38.3817	1.7765e-05
85	Interneuron_M2	Cycling_progenitors	WNT5B	FZD3	2.31511e-07	0	WNT5B_FZD3	WNT5B - FZD3	ncWNT	Secreted Signaling	KEGG: hsa04310	LS	0.255311	33.0556	15.2068	9.95681e-22	NA	NA	NA	NA
86	Interneuron_M1	Cycling_progenitors	WNT5B	FZD3	2.3037e-07	0	WNT5B_FZD3	WNT5B - FZD3	ncWNT	Secreted Signaling	KEGG: hsa04310	LS	0.318663	33.6449	14.4191	2.19463e-29	NA	NA	NA	NA
87	Layer_2-4_ExN	Cycling_progenitors	WNT5B	FZD3	9.02207e-07	0	WNT5B_FZD3	WNT5B - FZD3	ncWNT	Secreted Signaling	KEGG: hsa04310	LS	0.103006	54.3471	51.0503	0.000115254	NA	NA	NA	NA
88	Interneuron_M2	Layer_2-4_ExN	WNT5B	FZD3	2.10238e-07	0	WNT5B_FZD3	WNT5B - FZD3	ncWNT	Secreted Signaling	KEGG: hsa04310	LS	0.255311	33.0556	15.2068	9.95681e-22	NA	NA	NA	NA
89	Interneuron_M1	Layer_2-4_ExN	WNT5B	FZD3	2.09203e-07	0.01	WNT5B_FZD3	WNT5B - FZD3	ncWNT	Secreted Signaling	KEGG: hsa04310	LS	0.318663	33.6449	14.4191	2.19463e-29	NA	NA	NA	NA
90	Layer_2-4_ExN	Layer_2-4_ExN	WNT5B	FZD3	8.19308e-07	0	WNT5B_FZD3	WNT5B - FZD3	ncWNT	Secreted Signaling	KEGG: hsa04310	LS	0.103006	54.3471	51.0503	0.000115254	NA	NA	NA	NA
91	Layer_2-4_ExN	Interneuron_4	WNT5B	FZD3	7.40251e-07	0	WNT5B_FZD3	WNT5B - FZD3	ncWNT	Secreted Signaling	KEGG: hsa04310	LS	0.103006	54.3471	51.0503	0.000115254	NA	NA	NA	NA
92	Interneuron_M2	Astrocyte_progenitors	WNT5B	FZD3	2.49133e-07	0	WNT5B_FZD3	WNT5B - FZD3	ncWNT	Secreted Signaling	KEGG: hsa04310	LS	0.255311	33.0556	15.2068	9.95681e-22	NA	NA	NA	NA
93	Interneuron_M1	Astrocyte_progenitors	WNT5B	FZD3	2.47905e-07	0	WNT5B_FZD3	WNT5B - FZD3	ncWNT	Secreted Signaling	KEGG: hsa04310	LS	0.318663	33.6449	14.4191	2.19463e-29	NA	NA	NA	NA
94	Layer_2-4_ExN	Astrocyte_progenitors	WNT5B	FZD3	9.70879e-07	0	WNT5B_FZD3	WNT5B - FZD3	ncWNT	Secreted Signaling	KEGG: hsa04310	LS	0.103006	54.3471	51.0503	0.000115254	NA	NA	NA	NA
95	Interneuron_M2	Interneuron_S2	WNT5B	FZD3	2.38782e-07	0	WNT5B_FZD3	WNT5B - FZD3	ncWNT	Secreted Signaling	KEGG: hsa04310	LS	0.255311	33.0556	15.2068	9.95681e-22	0.259784	43.9474	37.3333	8.19235e-07
96	Interneuron_M1	Interneuron_S2	WNT5B	FZD3	2.37605e-07	0	WNT5B_FZD3	WNT5B - FZD3	ncWNT	Secreted Signaling	KEGG: hsa04310	LS	0.318663	33.6449	14.4191	2.19463e-29	0.259784	43.9474	37.3333	8.19235e-07
97	Layer_2-4_ExN	Interneuron_S2	WNT5B	FZD3	9.30541e-07	0	WNT5B_FZD3	WNT5B - FZD3	ncWNT	Secreted Signaling	KEGG: hsa04310	LS	0.103006	54.3471	51.0503	0.000115254	0.259784	43.9474	37.3333	8.19235e-07
98	Interneuron_M2	Smooth_muscle_2	WNT5B	FZD4	1.57984e-07	0	WNT5B_FZD4	WNT5B - FZD4	ncWNT	Secreted Signaling	KEGG: hsa04310	LS	0.255311	33.0556	15.2068	9.95681e-22	-1.25668	29.1667	63.9241	4.23902e-12
99	Interneuron_M1	Smooth_muscle_2	WNT5B	FZD4	1.57205e-07	0	WNT5B_FZD4	WNT5B - FZD4	ncWNT	Secreted Signaling	KEGG: hsa04310	LS	0.318663	33.6449	14.4191	2.19463e-29	-1.25668	29.1667	63.9241	4.23902e-12
100	Layer_2-4_ExN	Smooth_muscle_2	WNT5B	FZD4	6.15669e-07	0	WNT5B_FZD4	WNT5B - FZD4	ncWNT	Secreted Signaling	KEGG: hsa04310	LS	0.103006	54.3471	51.0503	0.000115254	-1.25668	29.1667	63.9241	4.23902e-12
101	Interneuron_M2	Smooth_muscle_2	WNT5B	FZD6	2.29326e-07	0	WNT5B_FZD6	WNT5B - FZD6	ncWNT	Secreted Signaling	KEGG: hsa04310	LS	0.255311	33.0556	15.2068	9.95681e-22	-0.686196	27.7778	54.4304	3.76983e-07
102	Interneuron_M1	Smooth_muscle_2	WNT5B	FZD6	2.28196e-07	0	WNT5B_FZD6	WNT5B - FZD6	ncWNT	Secreted Signaling	KEGG: hsa04310	LS	0.318663	33.6449	14.4191	2.19463e-29	-0.686196	27.7778	54.4304	3.76983e-07
103	Layer_2-4_ExN	Smooth_muscle_2	WNT5B	FZD6	8.93691e-07	0	WNT5B_FZD6	WNT5B - FZD6	ncWNT	Secreted Signaling	KEGG: hsa04310	LS	0.103006	54.3471	51.0503	0.000115254	-0.686196	27.7778	54.4304	3.76983e-07
104	Layer_4-6_ExN	OPC_1	NRG1	ERBB3	7.79511e-06	0	NRG1_ERBB3	NRG1 - ERBB3	NRG	Secreted Signaling	KEGG: hsa04012	LS	1.46692	89.3883	88.0926	4.10911e-07	NA	NA	NA	NA
105	oRG	OPC_1	NRG1	ERBB3	1.09459e-05	0	NRG1_ERBB3	NRG1 - ERBB3	NRG	Secreted Signaling	KEGG: hsa04012	LS	2.45898	95.0615	70.6321	1.23025e-99	NA	NA	NA	NA
106	IP	OPC_1	NRG1	ERBB3	3.54852e-06	0	NRG1_ERBB3	NRG1 - ERBB3	NRG	Secreted Signaling	KEGG: hsa04012	LS	0.568094	79.9024	59.8188	1.66366e-68	NA	NA	NA	NA
107	Interneuron_1	OPC_1	NRG1	ERBB3	8.82484e-08	0	NRG1_ERBB3	NRG1 - ERBB3	NRG	Secreted Signaling	KEGG: hsa04012	LS	0.102605	30.9682	25.3161	4.39875e-06	NA	NA	NA	NA
108	IP_IN	OPC_1	NRG1	ERBB3	2.20506e-07	0	NRG1_ERBB3	NRG1 - ERBB3	NRG	Secreted Signaling	KEGG: hsa04012	LS	0.329069	35.9756	13.7387	7.99368e-16	NA	NA	NA	NA
109	Mig_Layer_2-4_ExN	OPC_1	NRG1	ERBB3	2.97619e-06	0	NRG1_ERBB3	NRG1 - ERBB3	NRG	Secreted Signaling	KEGG: hsa04012	LS	1.32023	79.1033	69.868	2.39227e-40	NA	NA	NA	NA
110	Layer_4-5_ExN	OPC_1	NRG1	ERBB3	3.128e-06	0	NRG1_ERBB3	NRG1 - ERBB3	NRG	Secreted Signaling	KEGG: hsa04012	LS	0.505329	80.886	70.0611	3.82963e-06	NA	NA	NA	NA
111	Cycling_progenitors	OPC_1	NRG1	ERBB3	5.55702e-06	0	NRG1_ERBB3	NRG1 - ERBB3	NRG	Secreted Signaling	KEGG: hsa04012	LS	3.55718	84.7158	54.1111	2.76934e-56	NA	NA	NA	NA
112	Layer_2-4_ExN	OPC_1	NRG1	ERBB3	5.13832e-06	0	NRG1_ERBB3	NRG1 - ERBB3	NRG	Secreted Signaling	KEGG: hsa04012	LS	0.0853468	86.5188	82.5354	1.75411e-06	NA	NA	NA	NA
113	Smooth_muscle_2	OPC_1	NRG1	ERBB3	3.5099e-07	0	NRG1_ERBB3	NRG1 - ERBB3	NRG	Secreted Signaling	KEGG: hsa04012	LS	1.28501	34.7222	10.7595	2.46033e-07	NA	NA	NA	NA
114	Interneuron_S2	OPC_1	NRG1	ERBB3	1.54329e-05	0	NRG1_ERBB3	NRG1 - ERBB3	NRG	Secreted Signaling	KEGG: hsa04012	LS	10.5676	95.4386	81.8667	2.06236e-22	NA	NA	NA	NA
115	Layer_4-6_ExN	OL	NRG1	ERBB3	2.37217e-05	0	NRG1_ERBB3	NRG1 - ERBB3	NRG	Secreted Signaling	KEGG: hsa04012	LS	1.46692	89.3883	88.0926	4.10911e-07	NA	NA	NA	NA
116	oRG	OL	NRG1	ERBB3	3.33099e-05	0	NRG1_ERBB3	NRG1 - ERBB3	NRG	Secreted Signaling	KEGG: hsa04012	LS	2.45898	95.0615	70.6321	1.23025e-99	NA	NA	NA	NA
117	IP	OL	NRG1	ERBB3	1.07988e-05	0	NRG1_ERBB3	NRG1 - ERBB3	NRG	Secreted Signaling	KEGG: hsa04012	LS	0.568094	79.9024	59.8188	1.66366e-68	NA	NA	NA	NA
118	Interneuron_1	OL	NRG1	ERBB3	2.68557e-07	0	NRG1_ERBB3	NRG1 - ERBB3	NRG	Secreted Signaling	KEGG: hsa04012	LS	0.102605	30.9682	25.3161	4.39875e-06	NA	NA	NA	NA
119	IP_IN	OL	NRG1	ERBB3	6.71044e-07	0	NRG1_ERBB3	NRG1 - ERBB3	NRG	Secreted Signaling	KEGG: hsa04012	LS	0.329069	35.9756	13.7387	7.99368e-16	NA	NA	NA	NA
120	Mig_Layer_2-4_ExN	OL	NRG1	ERBB3	9.05707e-06	0	NRG1_ERBB3	NRG1 - ERBB3	NRG	Secreted Signaling	KEGG: hsa04012	LS	1.32023	79.1033	69.868	2.39227e-40	NA	NA	NA	NA
121	Layer_4-5_ExN	OL	NRG1	ERBB3	9.51908e-06	0	NRG1_ERBB3	NRG1 - ERBB3	NRG	Secreted Signaling	KEGG: hsa04012	LS	0.505329	80.886	70.0611	3.82963e-06	NA	NA	NA	NA
122	Cycling_progenitors	OL	NRG1	ERBB3	1.69109e-05	0	NRG1_ERBB3	NRG1 - ERBB3	NRG	Secreted Signaling	KEGG: hsa04012	LS	3.55718	84.7158	54.1111	2.76934e-56	NA	NA	NA	NA
123	Layer_2-4_ExN	OL	NRG1	ERBB3	1.56368e-05	0	NRG1_ERBB3	NRG1 - ERBB3	NRG	Secreted Signaling	KEGG: hsa04012	LS	0.0853468	86.5188	82.5354	1.75411e-06	NA	NA	NA	NA
124	Smooth_muscle_2	OL	NRG1	ERBB3	1.06813e-06	0	NRG1_ERBB3	NRG1 - ERBB3	NRG	Secreted Signaling	KEGG: hsa04012	LS	1.28501	34.7222	10.7595	2.46033e-07	NA	NA	NA	NA
125	Interneuron_S2	OL	NRG1	ERBB3	4.69641e-05	0	NRG1_ERBB3	NRG1 - ERBB3	NRG	Secreted Signaling	KEGG: hsa04012	LS	10.5676	95.4386	81.8667	2.06236e-22	NA	NA	NA	NA
126	Layer_4-6_ExN	Interneuron_1	NRG1	ERBB4	0.000469568	0	NRG1_ERBB4	NRG1 - ERBB4	NRG	Secreted Signaling	KEGG: hsa04012	LS	1.46692	89.3883	88.0926	4.10911e-07	5.50962	88.9874	75.9783	3.02706e-62
127	oRG	Interneuron_1	NRG1	ERBB4	0.000659247	0	NRG1_ERBB4	NRG1 - ERBB4	NRG	Secreted Signaling	KEGG: hsa04012	LS	2.45898	95.0615	70.6321	1.23025e-99	5.50962	88.9874	75.9783	3.02706e-62
128	IP	Interneuron_1	NRG1	ERBB4	0.000213813	0	NRG1_ERBB4	NRG1 - ERBB4	NRG	Secreted Signaling	KEGG: hsa04012	LS	0.568094	79.9024	59.8188	1.66366e-68	5.50962	88.9874	75.9783	3.02706e-62
129	Interneuron_1	Interneuron_1	NRG1	ERBB4	5.31841e-06	0	NRG1_ERBB4	NRG1 - ERBB4	NRG	Secreted Signaling	KEGG: hsa04012	LS	0.102605	30.9682	25.3161	4.39875e-06	5.50962	88.9874	75.9783	3.02706e-62
130	IP_IN	Interneuron_1	NRG1	ERBB4	1.3289e-05	0	NRG1_ERBB4	NRG1 - ERBB4	NRG	Secreted Signaling	KEGG: hsa04012	LS	0.329069	35.9756	13.7387	7.99368e-16	5.50962	88.9874	75.9783	3.02706e-62
131	Mig_Layer_2-4_ExN	Interneuron_1	NRG1	ERBB4	0.000179333	0	NRG1_ERBB4	NRG1 - ERBB4	NRG	Secreted Signaling	KEGG: hsa04012	LS	1.32023	79.1033	69.868	2.39227e-40	5.50962	88.9874	75.9783	3.02706e-62
132	Layer_4-5_ExN	Interneuron_1	NRG1	ERBB4	0.000188479	0	NRG1_ERBB4	NRG1 - ERBB4	NRG	Secreted Signaling	KEGG: hsa04012	LS	0.505329	80.886	70.0611	3.82963e-06	5.50962	88.9874	75.9783	3.02706e-62
133	Cycling_progenitors	Interneuron_1	NRG1	ERBB4	0.000334793	0	NRG1_ERBB4	NRG1 - ERBB4	NRG	Secreted Signaling	KEGG: hsa04012	LS	3.55718	84.7158	54.1111	2.76934e-56	5.50962	88.9874	75.9783	3.02706e-62
134	Layer_2-4_ExN	Interneuron_1	NRG1	ERBB4	0.000309575	0	NRG1_ERBB4	NRG1 - ERBB4	NRG	Secreted Signaling	KEGG: hsa04012	LS	0.0853468	86.5188	82.5354	1.75411e-06	5.50962	88.9874	75.9783	3.02706e-62
135	Smooth_muscle_2	Interneuron_1	NRG1	ERBB4	2.11526e-05	0	NRG1_ERBB4	NRG1 - ERBB4	NRG	Secreted Signaling	KEGG: hsa04012	LS	1.28501	34.7222	10.7595	2.46033e-07	5.50962	88.9874	75.9783	3.02706e-62
136	Interneuron_S2	Interneuron_1	NRG1	ERBB4	0.000929243	0	NRG1_ERBB4	NRG1 - ERBB4	NRG	Secreted Signaling	KEGG: hsa04012	LS	10.5676	95.4386	81.8667	2.06236e-22	5.50962	88.9874	75.9783	3.02706e-62
137	Layer_4-6_ExN	Interneuron_2	NRG1	ERBB4	0.00105923	0	NRG1_ERBB4	NRG1 - ERBB4	NRG	Secreted Signaling	KEGG: hsa04012	LS	1.46692	89.3883	88.0926	4.10911e-07	9.14795	99.7113	94.6765	2.491e-97
138	oRG	Interneuron_2	NRG1	ERBB4	0.00148674	0	NRG1_ERBB4	NRG1 - ERBB4	NRG	Secreted Signaling	KEGG: hsa04012	LS	2.45898	95.0615	70.6321	1.23025e-99	9.14795	99.7113	94.6765	2.491e-97
139	IP	Interneuron_2	NRG1	ERBB4	0.000482462	0	NRG1_ERBB4	NRG1 - ERBB4	NRG	Secreted Signaling	KEGG: hsa04012	LS	0.568094	79.9024	59.8188	1.66366e-68	9.14795	99.7113	94.6765	2.491e-97
140	Interneuron_1	Interneuron_2	NRG1	ERBB4	1.2004e-05	0	NRG1_ERBB4	NRG1 - ERBB4	NRG	Secreted Signaling	KEGG: hsa04012	LS	0.102605	30.9682	25.3161	4.39875e-06	9.14795	99.7113	94.6765	2.491e-97
141	IP_IN	Interneuron_2	NRG1	ERBB4	2.99938e-05	0	NRG1_ERBB4	NRG1 - ERBB4	NRG	Secreted Signaling	KEGG: hsa04012	LS	0.329069	35.9756	13.7387	7.99368e-16	9.14795	99.7113	94.6765	2.491e-97
142	Mig_Layer_2-4_ExN	Interneuron_2	NRG1	ERBB4	0.000404677	0	NRG1_ERBB4	NRG1 - ERBB4	NRG	Secreted Signaling	KEGG: hsa04012	LS	1.32023	79.1033	69.868	2.39227e-40	9.14795	99.7113	94.6765	2.491e-97
143	Layer_4-5_ExN	Interneuron_2	NRG1	ERBB4	0.000425311	0	NRG1_ERBB4	NRG1 - ERBB4	NRG	Secreted Signaling	KEGG: hsa04012	LS	0.505329	80.886	70.0611	3.82963e-06	9.14795	99.7113	94.6765	2.491e-97
144	Cycling_progenitors	Interneuron_2	NRG1	ERBB4	0.000755336	0	NRG1_ERBB4	NRG1 - ERBB4	NRG	Secreted Signaling	KEGG: hsa04012	LS	3.55718	84.7158	54.1111	2.76934e-56	9.14795	99.7113	94.6765	2.491e-97
145	Layer_2-4_ExN	Interneuron_2	NRG1	ERBB4	0.000698463	0	NRG1_ERBB4	NRG1 - ERBB4	NRG	Secreted Signaling	KEGG: hsa04012	LS	0.0853468	86.5188	82.5354	1.75411e-06	9.14795	99.7113	94.6765	2.491e-97
146	Smooth_muscle_2	Interneuron_2	NRG1	ERBB4	4.77417e-05	0	NRG1_ERBB4	NRG1 - ERBB4	NRG	Secreted Signaling	KEGG: hsa04012	LS	1.28501	34.7222	10.7595	2.46033e-07	9.14795	99.7113	94.6765	2.491e-97
147	Interneuron_S2	Interneuron_2	NRG1	ERBB4	0.00209492	0	NRG1_ERBB4	NRG1 - ERBB4	NRG	Secreted Signaling	KEGG: hsa04012	LS	10.5676	95.4386	81.8667	2.06236e-22	9.14795	99.7113	94.6765	2.491e-97
148	Layer_4-6_ExN	IP_IN	NRG1	ERBB4	5.87605e-06	0	NRG1_ERBB4	NRG1 - ERBB4	NRG	Secreted Signaling	KEGG: hsa04012	LS	1.46692	89.3883	88.0926	4.10911e-07	-0.84693	29.878	44.6697	0.000454406
149	oRG	IP_IN	NRG1	ERBB4	8.25119e-06	0	NRG1_ERBB4	NRG1 - ERBB4	NRG	Secreted Signaling	KEGG: hsa04012	LS	2.45898	95.0615	70.6321	1.23025e-99	-0.84693	29.878	44.6697	0.000454406
150	IP	IP_IN	NRG1	ERBB4	2.67492e-06	0	NRG1_ERBB4	NRG1 - ERBB4	NRG	Secreted Signaling	KEGG: hsa04012	LS	0.568094	79.9024	59.8188	1.66366e-68	-0.84693	29.878	44.6697	0.000454406
151	Mig_Layer_2-4_ExN	IP_IN	NRG1	ERBB4	2.24348e-06	0.02	NRG1_ERBB4	NRG1 - ERBB4	NRG	Secreted Signaling	KEGG: hsa04012	LS	1.32023	79.1033	69.868	2.39227e-40	-0.84693	29.878	44.6697	0.000454406
152	Layer_4-5_ExN	IP_IN	NRG1	ERBB4	2.35792e-06	0.01	NRG1_ERBB4	NRG1 - ERBB4	NRG	Secreted Signaling	KEGG: hsa04012	LS	0.505329	80.886	70.0611	3.82963e-06	-0.84693	29.878	44.6697	0.000454406
153	Cycling_progenitors	IP_IN	NRG1	ERBB4	4.18895e-06	0	NRG1_ERBB4	NRG1 - ERBB4	NRG	Secreted Signaling	KEGG: hsa04012	LS	3.55718	84.7158	54.1111	2.76934e-56	-0.84693	29.878	44.6697	0.000454406
154	Layer_2-4_ExN	IP_IN	NRG1	ERBB4	3.87333e-06	0	NRG1_ERBB4	NRG1 - ERBB4	NRG	Secreted Signaling	KEGG: hsa04012	LS	0.0853468	86.5188	82.5354	1.75411e-06	-0.84693	29.878	44.6697	0.000454406
155	Interneuron_S2	IP_IN	NRG1	ERBB4	1.16336e-05	0	NRG1_ERBB4	NRG1 - ERBB4	NRG	Secreted Signaling	KEGG: hsa04012	LS	10.5676	95.4386	81.8667	2.06236e-22	-0.84693	29.878	44.6697	0.000454406
156	Layer_4-6_ExN	Interneuron_3	NRG1	ERBB4	0.00138798	0	NRG1_ERBB4	NRG1 - ERBB4	NRG	Secreted Signaling	KEGG: hsa04012	LS	1.46692	89.3883	88.0926	4.10911e-07	NA	NA	NA	NA
157	oRG	Interneuron_3	NRG1	ERBB4	0.00194792	0	NRG1_ERBB4	NRG1 - ERBB4	NRG	Secreted Signaling	KEGG: hsa04012	LS	2.45898	95.0615	70.6321	1.23025e-99	NA	NA	NA	NA
158	IP	Interneuron_3	NRG1	ERBB4	0.000632317	0	NRG1_ERBB4	NRG1 - ERBB4	NRG	Secreted Signaling	KEGG: hsa04012	LS	0.568094	79.9024	59.8188	1.66366e-68	NA	NA	NA	NA
159	Interneuron_1	Interneuron_3	NRG1	ERBB4	1.57348e-05	0	NRG1_ERBB4	NRG1 - ERBB4	NRG	Secreted Signaling	KEGG: hsa04012	LS	0.102605	30.9682	25.3161	4.39875e-06	NA	NA	NA	NA
160	IP_IN	Interneuron_3	NRG1	ERBB4	3.93155e-05	0	NRG1_ERBB4	NRG1 - ERBB4	NRG	Secreted Signaling	KEGG: hsa04012	LS	0.329069	35.9756	13.7387	7.99368e-16	NA	NA	NA	NA
161	Mig_Layer_2-4_ExN	Interneuron_3	NRG1	ERBB4	0.000530385	0	NRG1_ERBB4	NRG1 - ERBB4	NRG	Secreted Signaling	KEGG: hsa04012	LS	1.32023	79.1033	69.868	2.39227e-40	NA	NA	NA	NA
162	Layer_4-5_ExN	Interneuron_3	NRG1	ERBB4	0.000557425	0	NRG1_ERBB4	NRG1 - ERBB4	NRG	Secreted Signaling	KEGG: hsa04012	LS	0.505329	80.886	70.0611	3.82963e-06	NA	NA	NA	NA
163	Cycling_progenitors	Interneuron_3	NRG1	ERBB4	0.000989863	0	NRG1_ERBB4	NRG1 - ERBB4	NRG	Secreted Signaling	KEGG: hsa04012	LS	3.55718	84.7158	54.1111	2.76934e-56	NA	NA	NA	NA
164	Layer_2-4_ExN	Interneuron_3	NRG1	ERBB4	0.000915347	0	NRG1_ERBB4	NRG1 - ERBB4	NRG	Secreted Signaling	KEGG: hsa04012	LS	0.0853468	86.5188	82.5354	1.75411e-06	NA	NA	NA	NA
165	Smooth_muscle_2	Interneuron_3	NRG1	ERBB4	6.2579e-05	0	NRG1_ERBB4	NRG1 - ERBB4	NRG	Secreted Signaling	KEGG: hsa04012	LS	1.28501	34.7222	10.7595	2.46033e-07	NA	NA	NA	NA
166	Interneuron_S2	Interneuron_3	NRG1	ERBB4	0.00274424	0	NRG1_ERBB4	NRG1 - ERBB4	NRG	Secreted Signaling	KEGG: hsa04012	LS	10.5676	95.4386	81.8667	2.06236e-22	NA	NA	NA	NA
167	Layer_4-6_ExN	Interneuron_M1	NRG1	ERBB4	6.05806e-07	0	NRG1_ERBB4	NRG1 - ERBB4	NRG	Secreted Signaling	KEGG: hsa04012	LS	1.46692	89.3883	88.0926	4.10911e-07	0.161142	25.1558	40.8714	2.55184e-11
168	oRG	Interneuron_M1	NRG1	ERBB4	8.50679e-07	0	NRG1_ERBB4	NRG1 - ERBB4	NRG	Secreted Signaling	KEGG: hsa04012	LS	2.45898	95.0615	70.6321	1.23025e-99	0.161142	25.1558	40.8714	2.55184e-11
169	IP	Interneuron_M1	NRG1	ERBB4	2.75777e-07	0	NRG1_ERBB4	NRG1 - ERBB4	NRG	Secreted Signaling	KEGG: hsa04012	LS	0.568094	79.9024	59.8188	1.66366e-68	0.161142	25.1558	40.8714	2.55184e-11
170	Interneuron_1	Interneuron_M1	NRG1	ERBB4	6.85828e-09	0.01	NRG1_ERBB4	NRG1 - ERBB4	NRG	Secreted Signaling	KEGG: hsa04012	LS	0.102605	30.9682	25.3161	4.39875e-06	0.161142	25.1558	40.8714	2.55184e-11
171	IP_IN	Interneuron_M1	NRG1	ERBB4	1.71368e-08	0.01	NRG1_ERBB4	NRG1 - ERBB4	NRG	Secreted Signaling	KEGG: hsa04012	LS	0.329069	35.9756	13.7387	7.99368e-16	0.161142	25.1558	40.8714	2.55184e-11
172	Mig_Layer_2-4_ExN	Interneuron_M1	NRG1	ERBB4	2.31297e-07	0	NRG1_ERBB4	NRG1 - ERBB4	NRG	Secreted Signaling	KEGG: hsa04012	LS	1.32023	79.1033	69.868	2.39227e-40	0.161142	25.1558	40.8714	2.55184e-11
173	Layer_4-5_ExN	Interneuron_M1	NRG1	ERBB4	2.43096e-07	0	NRG1_ERBB4	NRG1 - ERBB4	NRG	Secreted Signaling	KEGG: hsa04012	LS	0.505329	80.886	70.0611	3.82963e-06	0.161142	25.1558	40.8714	2.55184e-11
174	Cycling_progenitors	Interneuron_M1	NRG1	ERBB4	4.3187e-07	0	NRG1_ERBB4	NRG1 - ERBB4	NRG	Secreted Signaling	KEGG: hsa04012	LS	3.55718	84.7158	54.1111	2.76934e-56	0.161142	25.1558	40.8714	2.55184e-11
175	Layer_2-4_ExN	Interneuron_M1	NRG1	ERBB4	3.9933e-07	0	NRG1_ERBB4	NRG1 - ERBB4	NRG	Secreted Signaling	KEGG: hsa04012	LS	0.0853468	86.5188	82.5354	1.75411e-06	0.161142	25.1558	40.8714	2.55184e-11
176	Smooth_muscle_2	Interneuron_M1	NRG1	ERBB4	2.72774e-08	0.01	NRG1_ERBB4	NRG1 - ERBB4	NRG	Secreted Signaling	KEGG: hsa04012	LS	1.28501	34.7222	10.7595	2.46033e-07	0.161142	25.1558	40.8714	2.55184e-11
177	Interneuron_S2	Interneuron_M1	NRG1	ERBB4	1.1994e-06	0	NRG1_ERBB4	NRG1 - ERBB4	NRG	Secreted Signaling	KEGG: hsa04012	LS	10.5676	95.4386	81.8667	2.06236e-22	0.161142	25.1558	40.8714	2.55184e-11
178	Layer_4-6_ExN	OPC_1	NRG1	ERBB4	0.000131883	0	NRG1_ERBB4	NRG1 - ERBB4	NRG	Secreted Signaling	KEGG: hsa04012	LS	1.46692	89.3883	88.0926	4.10911e-07	0.945734	86.8275	70.1107	1.79322e-06
179	oRG	OPC_1	NRG1	ERBB4	0.000185182	0	NRG1_ERBB4	NRG1 - ERBB4	NRG	Secreted Signaling	KEGG: hsa04012	LS	2.45898	95.0615	70.6321	1.23025e-99	0.945734	86.8275	70.1107	1.79322e-06
180	IP	OPC_1	NRG1	ERBB4	6.00406e-05	0	NRG1_ERBB4	NRG1 - ERBB4	NRG	Secreted Signaling	KEGG: hsa04012	LS	0.568094	79.9024	59.8188	1.66366e-68	0.945734	86.8275	70.1107	1.79322e-06
181	Interneuron_1	OPC_1	NRG1	ERBB4	1.49323e-06	0	NRG1_ERBB4	NRG1 - ERBB4	NRG	Secreted Signaling	KEGG: hsa04012	LS	0.102605	30.9682	25.3161	4.39875e-06	0.945734	86.8275	70.1107	1.79322e-06
182	IP_IN	OPC_1	NRG1	ERBB4	3.73113e-06	0	NRG1_ERBB4	NRG1 - ERBB4	NRG	Secreted Signaling	KEGG: hsa04012	LS	0.329069	35.9756	13.7387	7.99368e-16	0.945734	86.8275	70.1107	1.79322e-06
183	Mig_Layer_2-4_ExN	OPC_1	NRG1	ERBB4	5.03572e-05	0	NRG1_ERBB4	NRG1 - ERBB4	NRG	Secreted Signaling	KEGG: hsa04012	LS	1.32023	79.1033	69.868	2.39227e-40	0.945734	86.8275	70.1107	1.79322e-06
184	Layer_4-5_ExN	OPC_1	NRG1	ERBB4	5.29258e-05	0	NRG1_ERBB4	NRG1 - ERBB4	NRG	Secreted Signaling	KEGG: hsa04012	LS	0.505329	80.886	70.0611	3.82963e-06	0.945734	86.8275	70.1107	1.79322e-06
185	Cycling_progenitors	OPC_1	NRG1	ERBB4	9.40212e-05	0	NRG1_ERBB4	NRG1 - ERBB4	NRG	Secreted Signaling	KEGG: hsa04012	LS	3.55718	84.7158	54.1111	2.76934e-56	0.945734	86.8275	70.1107	1.79322e-06
186	Layer_2-4_ExN	OPC_1	NRG1	ERBB4	8.69375e-05	0	NRG1_ERBB4	NRG1 - ERBB4	NRG	Secreted Signaling	KEGG: hsa04012	LS	0.0853468	86.5188	82.5354	1.75411e-06	0.945734	86.8275	70.1107	1.79322e-06
187	Smooth_muscle_2	OPC_1	NRG1	ERBB4	5.93901e-06	0	NRG1_ERBB4	NRG1 - ERBB4	NRG	Secreted Signaling	KEGG: hsa04012	LS	1.28501	34.7222	10.7595	2.46033e-07	0.945734	86.8275	70.1107	1.79322e-06
188	Interneuron_S2	OPC_1	NRG1	ERBB4	0.000261074	0	NRG1_ERBB4	NRG1 - ERBB4	NRG	Secreted Signaling	KEGG: hsa04012	LS	10.5676	95.4386	81.8667	2.06236e-22	0.945734	86.8275	70.1107	1.79322e-06
189	Layer_4-6_ExN	Interneuron_S1	NRG1	ERBB4	0.00041748	0	NRG1_ERBB4	NRG1 - ERBB4	NRG	Secreted Signaling	KEGG: hsa04012	LS	1.46692	89.3883	88.0926	4.10911e-07	-3.02064	91.8587	92.1225	0.00161662
190	oRG	Interneuron_S1	NRG1	ERBB4	0.00058613	0	NRG1_ERBB4	NRG1 - ERBB4	NRG	Secreted Signaling	KEGG: hsa04012	LS	2.45898	95.0615	70.6321	1.23025e-99	-3.02064	91.8587	92.1225	0.00161662
191	IP	Interneuron_S1	NRG1	ERBB4	0.000190089	0	NRG1_ERBB4	NRG1 - ERBB4	NRG	Secreted Signaling	KEGG: hsa04012	LS	0.568094	79.9024	59.8188	1.66366e-68	-3.02064	91.8587	92.1225	0.00161662
192	Interneuron_1	Interneuron_S1	NRG1	ERBB4	4.7282e-06	0	NRG1_ERBB4	NRG1 - ERBB4	NRG	Secreted Signaling	KEGG: hsa04012	LS	0.102605	30.9682	25.3161	4.39875e-06	-3.02064	91.8587	92.1225	0.00161662
193	IP_IN	Interneuron_S1	NRG1	ERBB4	1.18143e-05	0	NRG1_ERBB4	NRG1 - ERBB4	NRG	Secreted Signaling	KEGG: hsa04012	LS	0.329069	35.9756	13.7387	7.99368e-16	-3.02064	91.8587	92.1225	0.00161662
194	Mig_Layer_2-4_ExN	Interneuron_S1	NRG1	ERBB4	0.000159435	0	NRG1_ERBB4	NRG1 - ERBB4	NRG	Secreted Signaling	KEGG: hsa04012	LS	1.32023	79.1033	69.868	2.39227e-40	-3.02064	91.8587	92.1225	0.00161662
195	Layer_4-5_ExN	Interneuron_S1	NRG1	ERBB4	0.000167566	0	NRG1_ERBB4	NRG1 - ERBB4	NRG	Secreted Signaling	KEGG: hsa04012	LS	0.505329	80.886	70.0611	3.82963e-06	-3.02064	91.8587	92.1225	0.00161662
196	Cycling_progenitors	Interneuron_S1	NRG1	ERBB4	0.00029765	0	NRG1_ERBB4	NRG1 - ERBB4	NRG	Secreted Signaling	KEGG: hsa04012	LS	3.55718	84.7158	54.1111	2.76934e-56	-3.02064	91.8587	92.1225	0.00161662
197	Layer_2-4_ExN	Interneuron_S1	NRG1	ERBB4	0.000275229	0	NRG1_ERBB4	NRG1 - ERBB4	NRG	Secreted Signaling	KEGG: hsa04012	LS	0.0853468	86.5188	82.5354	1.75411e-06	-3.02064	91.8587	92.1225	0.00161662
198	Smooth_muscle_2	Interneuron_S1	NRG1	ERBB4	1.88052e-05	0	NRG1_ERBB4	NRG1 - ERBB4	NRG	Secreted Signaling	KEGG: hsa04012	LS	1.28501	34.7222	10.7595	2.46033e-07	-3.02064	91.8587	92.1225	0.00161662
199	Interneuron_S2	Interneuron_S1	NRG1	ERBB4	0.000826205	0	NRG1_ERBB4	NRG1 - ERBB4	NRG	Secreted Signaling	KEGG: hsa04012	LS	10.5676	95.4386	81.8667	2.06236e-22	-3.02064	91.8587	92.1225	0.00161662
200	Layer_4-6_ExN	Interneuron_4	NRG1	ERBB4	0.000449271	0	NRG1_ERBB4	NRG1 - ERBB4	NRG	Secreted Signaling	KEGG: hsa04012	LS	1.46692	89.3883	88.0926	4.10911e-07	NA	NA	NA	NA
201	oRG	Interneuron_4	NRG1	ERBB4	0.000630757	0	NRG1_ERBB4	NRG1 - ERBB4	NRG	Secreted Signaling	KEGG: hsa04012	LS	2.45898	95.0615	70.6321	1.23025e-99	NA	NA	NA	NA
202	IP	Interneuron_4	NRG1	ERBB4	0.000204568	0	NRG1_ERBB4	NRG1 - ERBB4	NRG	Secreted Signaling	KEGG: hsa04012	LS	0.568094	79.9024	59.8188	1.66366e-68	NA	NA	NA	NA
203	Interneuron_1	Interneuron_4	NRG1	ERBB4	5.08842e-06	0	NRG1_ERBB4	NRG1 - ERBB4	NRG	Secreted Signaling	KEGG: hsa04012	LS	0.102605	30.9682	25.3161	4.39875e-06	NA	NA	NA	NA
204	IP_IN	Interneuron_4	NRG1	ERBB4	1.27143e-05	0	NRG1_ERBB4	NRG1 - ERBB4	NRG	Secreted Signaling	KEGG: hsa04012	LS	0.329069	35.9756	13.7387	7.99368e-16	NA	NA	NA	NA
205	Mig_Layer_2-4_ExN	Interneuron_4	NRG1	ERBB4	0.000171579	0	NRG1_ERBB4	NRG1 - ERBB4	NRG	Secreted Signaling	KEGG: hsa04012	LS	1.32023	79.1033	69.868	2.39227e-40	NA	NA	NA	NA
206	Layer_4-5_ExN	Interneuron_4	NRG1	ERBB4	0.00018033	0	NRG1_ERBB4	NRG1 - ERBB4	NRG	Secreted Signaling	KEGG: hsa04012	LS	0.505329	80.886	70.0611	3.82963e-06	NA	NA	NA	NA
207	Cycling_progenitors	Interneuron_4	NRG1	ERBB4	0.00032032	0	NRG1_ERBB4	NRG1 - ERBB4	NRG	Secreted Signaling	KEGG: hsa04012	LS	3.55718	84.7158	54.1111	2.76934e-56	NA	NA	NA	NA
208	Layer_2-4_ExN	Interneuron_4	NRG1	ERBB4	0.000296192	0	NRG1_ERBB4	NRG1 - ERBB4	NRG	Secreted Signaling	KEGG: hsa04012	LS	0.0853468	86.5188	82.5354	1.75411e-06	NA	NA	NA	NA
209	Smooth_muscle_2	Interneuron_4	NRG1	ERBB4	2.02379e-05	0	NRG1_ERBB4	NRG1 - ERBB4	NRG	Secreted Signaling	KEGG: hsa04012	LS	1.28501	34.7222	10.7595	2.46033e-07	NA	NA	NA	NA
210	Interneuron_S2	Interneuron_4	NRG1	ERBB4	0.000889094	0	NRG1_ERBB4	NRG1 - ERBB4	NRG	Secreted Signaling	KEGG: hsa04012	LS	10.5676	95.4386	81.8667	2.06236e-22	NA	NA	NA	NA
211	Layer_4-6_ExN	Astrocyte_progenitors	NRG1	ERBB4	0.000300129	0	NRG1_ERBB4	NRG1 - ERBB4	NRG	Secreted Signaling	KEGG: hsa04012	LS	1.46692	89.3883	88.0926	4.10911e-07	4.59006	86.6815	74.3662	2.15438e-55
212	oRG	Astrocyte_progenitors	NRG1	ERBB4	0.000421394	0	NRG1_ERBB4	NRG1 - ERBB4	NRG	Secreted Signaling	KEGG: hsa04012	LS	2.45898	95.0615	70.6321	1.23025e-99	4.59006	86.6815	74.3662	2.15438e-55
213	IP	Astrocyte_progenitors	NRG1	ERBB4	0.000136648	0	NRG1_ERBB4	NRG1 - ERBB4	NRG	Secreted Signaling	KEGG: hsa04012	LS	0.568094	79.9024	59.8188	1.66366e-68	4.59006	86.6815	74.3662	2.15438e-55
214	Interneuron_1	Astrocyte_progenitors	NRG1	ERBB4	3.39875e-06	0	NRG1_ERBB4	NRG1 - ERBB4	NRG	Secreted Signaling	KEGG: hsa04012	LS	0.102605	30.9682	25.3161	4.39875e-06	4.59006	86.6815	74.3662	2.15438e-55
215	IP_IN	Astrocyte_progenitors	NRG1	ERBB4	8.4924e-06	0	NRG1_ERBB4	NRG1 - ERBB4	NRG	Secreted Signaling	KEGG: hsa04012	LS	0.329069	35.9756	13.7387	7.99368e-16	4.59006	86.6815	74.3662	2.15438e-55
216	Mig_Layer_2-4_ExN	Astrocyte_progenitors	NRG1	ERBB4	0.000114611	0	NRG1_ERBB4	NRG1 - ERBB4	NRG	Secreted Signaling	KEGG: hsa04012	LS	1.32023	79.1033	69.868	2.39227e-40	4.59006	86.6815	74.3662	2.15438e-55
217	Layer_4-5_ExN	Astrocyte_progenitors	NRG1	ERBB4	0.000120456	0	NRG1_ERBB4	NRG1 - ERBB4	NRG	Secreted Signaling	KEGG: hsa04012	LS	0.505329	80.886	70.0611	3.82963e-06	4.59006	86.6815	74.3662	2.15438e-55
218	Cycling_progenitors	Astrocyte_progenitors	NRG1	ERBB4	0.000213976	0	NRG1_ERBB4	NRG1 - ERBB4	NRG	Secreted Signaling	KEGG: hsa04012	LS	3.55718	84.7158	54.1111	2.76934e-56	4.59006	86.6815	74.3662	2.15438e-55
219	Layer_2-4_ExN	Astrocyte_progenitors	NRG1	ERBB4	0.000197857	0	NRG1_ERBB4	NRG1 - ERBB4	NRG	Secreted Signaling	KEGG: hsa04012	LS	0.0853468	86.5188	82.5354	1.75411e-06	4.59006	86.6815	74.3662	2.15438e-55
220	Smooth_muscle_2	Astrocyte_progenitors	NRG1	ERBB4	1.35177e-05	0	NRG1_ERBB4	NRG1 - ERBB4	NRG	Secreted Signaling	KEGG: hsa04012	LS	1.28501	34.7222	10.7595	2.46033e-07	4.59006	86.6815	74.3662	2.15438e-55
221	Interneuron_S2	Astrocyte_progenitors	NRG1	ERBB4	0.000594034	0	NRG1_ERBB4	NRG1 - ERBB4	NRG	Secreted Signaling	KEGG: hsa04012	LS	10.5676	95.4386	81.8667	2.06236e-22	4.59006	86.6815	74.3662	2.15438e-55
222	Layer_4-6_ExN	Interneuron_S2	NRG1	ERBB4	0.000178283	0	NRG1_ERBB4	NRG1 - ERBB4	NRG	Secreted Signaling	KEGG: hsa04012	LS	1.46692	89.3883	88.0926	4.10911e-07	8.69819	68.6842	44	6.87253e-34
223	oRG	Interneuron_S2	NRG1	ERBB4	0.000250329	0	NRG1_ERBB4	NRG1 - ERBB4	NRG	Secreted Signaling	KEGG: hsa04012	LS	2.45898	95.0615	70.6321	1.23025e-99	8.69819	68.6842	44	6.87253e-34
224	IP	Interneuron_S2	NRG1	ERBB4	8.11664e-05	0	NRG1_ERBB4	NRG1 - ERBB4	NRG	Secreted Signaling	KEGG: hsa04012	LS	0.568094	79.9024	59.8188	1.66366e-68	8.69819	68.6842	44	6.87253e-34
225	Interneuron_1	Interneuron_S2	NRG1	ERBB4	2.01869e-06	0	NRG1_ERBB4	NRG1 - ERBB4	NRG	Secreted Signaling	KEGG: hsa04012	LS	0.102605	30.9682	25.3161	4.39875e-06	8.69819	68.6842	44	6.87253e-34
226	IP_IN	Interneuron_S2	NRG1	ERBB4	5.04407e-06	0	NRG1_ERBB4	NRG1 - ERBB4	NRG	Secreted Signaling	KEGG: hsa04012	LS	0.329069	35.9756	13.7387	7.99368e-16	8.69819	68.6842	44	6.87253e-34
227	Mig_Layer_2-4_ExN	Interneuron_S2	NRG1	ERBB4	6.80761e-05	0	NRG1_ERBB4	NRG1 - ERBB4	NRG	Secreted Signaling	KEGG: hsa04012	LS	1.32023	79.1033	69.868	2.39227e-40	8.69819	68.6842	44	6.87253e-34
228	Layer_4-5_ExN	Interneuron_S2	NRG1	ERBB4	7.15484e-05	0	NRG1_ERBB4	NRG1 - ERBB4	NRG	Secreted Signaling	KEGG: hsa04012	LS	0.505329	80.886	70.0611	3.82963e-06	8.69819	68.6842	44	6.87253e-34
229	Cycling_progenitors	Interneuron_S2	NRG1	ERBB4	0.000127102	0	NRG1_ERBB4	NRG1 - ERBB4	NRG	Secreted Signaling	KEGG: hsa04012	LS	3.55718	84.7158	54.1111	2.76934e-56	8.69819	68.6842	44	6.87253e-34
230	Layer_2-4_ExN	Interneuron_S2	NRG1	ERBB4	0.000117526	0	NRG1_ERBB4	NRG1 - ERBB4	NRG	Secreted Signaling	KEGG: hsa04012	LS	0.0853468	86.5188	82.5354	1.75411e-06	8.69819	68.6842	44	6.87253e-34
231	Smooth_muscle_2	Interneuron_S2	NRG1	ERBB4	8.02887e-06	0	NRG1_ERBB4	NRG1 - ERBB4	NRG	Secreted Signaling	KEGG: hsa04012	LS	1.28501	34.7222	10.7595	2.46033e-07	8.69819	68.6842	44	6.87253e-34
232	Interneuron_S2	Interneuron_S2	NRG1	ERBB4	0.000352911	0	NRG1_ERBB4	NRG1 - ERBB4	NRG	Secreted Signaling	KEGG: hsa04012	LS	10.5676	95.4386	81.8667	2.06236e-22	8.69819	68.6842	44	6.87253e-34
233	Layer_4-6_ExN	OL	NRG1	ERBB4	5.19798e-05	0	NRG1_ERBB4	NRG1 - ERBB4	NRG	Secreted Signaling	KEGG: hsa04012	LS	1.46692	89.3883	88.0926	4.10911e-07	1.22216	66.6667	22.7273	2.0198e-06
234	oRG	OL	NRG1	ERBB4	7.29891e-05	0	NRG1_ERBB4	NRG1 - ERBB4	NRG	Secreted Signaling	KEGG: hsa04012	LS	2.45898	95.0615	70.6321	1.23025e-99	1.22216	66.6667	22.7273	2.0198e-06
235	IP	OL	NRG1	ERBB4	2.3663e-05	0	NRG1_ERBB4	NRG1 - ERBB4	NRG	Secreted Signaling	KEGG: hsa04012	LS	0.568094	79.9024	59.8188	1.66366e-68	1.22216	66.6667	22.7273	2.0198e-06
236	Mig_Layer_2-4_ExN	OL	NRG1	ERBB4	1.98465e-05	0	NRG1_ERBB4	NRG1 - ERBB4	NRG	Secreted Signaling	KEGG: hsa04012	LS	1.32023	79.1033	69.868	2.39227e-40	1.22216	66.6667	22.7273	2.0198e-06
237	Layer_4-5_ExN	OL	NRG1	ERBB4	2.08589e-05	0	NRG1_ERBB4	NRG1 - ERBB4	NRG	Secreted Signaling	KEGG: hsa04012	LS	0.505329	80.886	70.0611	3.82963e-06	1.22216	66.6667	22.7273	2.0198e-06
238	Cycling_progenitors	OL	NRG1	ERBB4	3.70562e-05	0	NRG1_ERBB4	NRG1 - ERBB4	NRG	Secreted Signaling	KEGG: hsa04012	LS	3.55718	84.7158	54.1111	2.76934e-56	1.22216	66.6667	22.7273	2.0198e-06
239	Layer_2-4_ExN	OL	NRG1	ERBB4	3.42642e-05	0	NRG1_ERBB4	NRG1 - ERBB4	NRG	Secreted Signaling	KEGG: hsa04012	LS	0.0853468	86.5188	82.5354	1.75411e-06	1.22216	66.6667	22.7273	2.0198e-06
240	Smooth_muscle_2	OL	NRG1	ERBB4	2.34059e-06	0.03	NRG1_ERBB4	NRG1 - ERBB4	NRG	Secreted Signaling	KEGG: hsa04012	LS	1.28501	34.7222	10.7595	2.46033e-07	1.22216	66.6667	22.7273	2.0198e-06
241	Interneuron_S2	OL	NRG1	ERBB4	0.000102907	0	NRG1_ERBB4	NRG1 - ERBB4	NRG	Secreted Signaling	KEGG: hsa04012	LS	10.5676	95.4386	81.8667	2.06236e-22	1.22216	66.6667	22.7273	2.0198e-06
242	Interneuron_M2	OPC_1	NRG2	ERBB3	2.48718e-07	0	NRG2_ERBB3	NRG2 - ERBB3	NRG	Secreted Signaling	KEGG: hsa04012	LS	0.188491	30.8333	18.9781	1.16745e-11	NA	NA	NA	NA
243	Layer_5-6_ExN	OPC_1	NRG2	ERBB3	2.47396e-07	0	NRG2_ERBB3	NRG2 - ERBB3	NRG	Secreted Signaling	KEGG: hsa04012	LS	0.129858	33.0368	25.2292	1.3165e-08	NA	NA	NA	NA
244	Interneuron_M1	OPC_1	NRG2	ERBB3	2.4885e-07	0	NRG2_ERBB3	NRG2 - ERBB3	NRG	Secreted Signaling	KEGG: hsa04012	LS	0.137098	32.866	22.9253	8.03122e-10	NA	NA	NA	NA
245	Layer_4-5_ExN	OPC_1	NRG2	ERBB3	2.47097e-07	0	NRG2_ERBB3	NRG2 - ERBB3	NRG	Secreted Signaling	KEGG: hsa04012	LS	0.203181	37.3257	23.2179	4.81927e-08	NA	NA	NA	NA
246	Interneuron_S2	OPC_1	NRG2	ERBB3	1.01665e-06	0	NRG2_ERBB3	NRG2 - ERBB3	NRG	Secreted Signaling	KEGG: hsa04012	LS	0.609172	61.5789	39.4667	6.68542e-22	NA	NA	NA	NA
247	Interneuron_M2	OL	NRG2	ERBB3	7.56897e-07	0	NRG2_ERBB3	NRG2 - ERBB3	NRG	Secreted Signaling	KEGG: hsa04012	LS	0.188491	30.8333	18.9781	1.16745e-11	NA	NA	NA	NA
248	Layer_5-6_ExN	OL	NRG2	ERBB3	7.52875e-07	0	NRG2_ERBB3	NRG2 - ERBB3	NRG	Secreted Signaling	KEGG: hsa04012	LS	0.129858	33.0368	25.2292	1.3165e-08	NA	NA	NA	NA
249	Interneuron_M1	OL	NRG2	ERBB3	7.573e-07	0	NRG2_ERBB3	NRG2 - ERBB3	NRG	Secreted Signaling	KEGG: hsa04012	LS	0.137098	32.866	22.9253	8.03122e-10	NA	NA	NA	NA
250	Layer_4-5_ExN	OL	NRG2	ERBB3	7.51965e-07	0	NRG2_ERBB3	NRG2 - ERBB3	NRG	Secreted Signaling	KEGG: hsa04012	LS	0.203181	37.3257	23.2179	4.81927e-08	NA	NA	NA	NA
251	Interneuron_S2	OL	NRG2	ERBB3	3.09385e-06	0	NRG2_ERBB3	NRG2 - ERBB3	NRG	Secreted Signaling	KEGG: hsa04012	LS	0.609172	61.5789	39.4667	6.68542e-22	NA	NA	NA	NA
252	Interneuron_M2	Interneuron_1	NRG2	ERBB4	1.49892e-05	0	NRG2_ERBB4	NRG2 - ERBB4	NRG	Secreted Signaling	KEGG: hsa04012	LS	0.188491	30.8333	18.9781	1.16745e-11	5.50962	88.9874	75.9783	3.02706e-62
253	Layer_5-6_ExN	Interneuron_1	NRG2	ERBB4	1.49095e-05	0	NRG2_ERBB4	NRG2 - ERBB4	NRG	Secreted Signaling	KEGG: hsa04012	LS	0.129858	33.0368	25.2292	1.3165e-08	5.50962	88.9874	75.9783	3.02706e-62
254	Interneuron_M1	Interneuron_1	NRG2	ERBB4	1.49971e-05	0	NRG2_ERBB4	NRG2 - ERBB4	NRG	Secreted Signaling	KEGG: hsa04012	LS	0.137098	32.866	22.9253	8.03122e-10	5.50962	88.9874	75.9783	3.02706e-62
255	Layer_4-5_ExN	Interneuron_1	NRG2	ERBB4	1.48915e-05	0	NRG2_ERBB4	NRG2 - ERBB4	NRG	Secreted Signaling	KEGG: hsa04012	LS	0.203181	37.3257	23.2179	4.81927e-08	5.50962	88.9874	75.9783	3.02706e-62
256	Interneuron_S2	Interneuron_1	NRG2	ERBB4	6.12662e-05	0	NRG2_ERBB4	NRG2 - ERBB4	NRG	Secreted Signaling	KEGG: hsa04012	LS	0.609172	61.5789	39.4667	6.68542e-22	5.50962	88.9874	75.9783	3.02706e-62
257	Interneuron_M2	Interneuron_2	NRG2	ERBB4	3.3831e-05	0	NRG2_ERBB4	NRG2 - ERBB4	NRG	Secreted Signaling	KEGG: hsa04012	LS	0.188491	30.8333	18.9781	1.16745e-11	9.14795	99.7113	94.6765	2.491e-97
258	Layer_5-6_ExN	Interneuron_2	NRG2	ERBB4	3.36513e-05	0	NRG2_ERBB4	NRG2 - ERBB4	NRG	Secreted Signaling	KEGG: hsa04012	LS	0.129858	33.0368	25.2292	1.3165e-08	9.14795	99.7113	94.6765	2.491e-97
259	Interneuron_M1	Interneuron_2	NRG2	ERBB4	3.3849e-05	0	NRG2_ERBB4	NRG2 - ERBB4	NRG	Secreted Signaling	KEGG: hsa04012	LS	0.137098	32.866	22.9253	8.03122e-10	9.14795	99.7113	94.6765	2.491e-97
260	Layer_4-5_ExN	Interneuron_2	NRG2	ERBB4	3.36106e-05	0	NRG2_ERBB4	NRG2 - ERBB4	NRG	Secreted Signaling	KEGG: hsa04012	LS	0.203181	37.3257	23.2179	4.81927e-08	9.14795	99.7113	94.6765	2.491e-97
261	Interneuron_S2	Interneuron_2	NRG2	ERBB4	0.000138272	0	NRG2_ERBB4	NRG2 - ERBB4	NRG	Secreted Signaling	KEGG: hsa04012	LS	0.609172	61.5789	39.4667	6.68542e-22	9.14795	99.7113	94.6765	2.491e-97
262	Interneuron_M2	IP_IN	NRG2	ERBB4	1.87486e-07	0	NRG2_ERBB4	NRG2 - ERBB4	NRG	Secreted Signaling	KEGG: hsa04012	LS	0.188491	30.8333	18.9781	1.16745e-11	-0.84693	29.878	44.6697	0.000454406
263	Layer_5-6_ExN	IP_IN	NRG2	ERBB4	1.8649e-07	0	NRG2_ERBB4	NRG2 - ERBB4	NRG	Secreted Signaling	KEGG: hsa04012	LS	0.129858	33.0368	25.2292	1.3165e-08	-0.84693	29.878	44.6697	0.000454406
264	Interneuron_M1	IP_IN	NRG2	ERBB4	1.87586e-07	0	NRG2_ERBB4	NRG2 - ERBB4	NRG	Secreted Signaling	KEGG: hsa04012	LS	0.137098	32.866	22.9253	8.03122e-10	-0.84693	29.878	44.6697	0.000454406
265	Layer_4-5_ExN	IP_IN	NRG2	ERBB4	1.86264e-07	0	NRG2_ERBB4	NRG2 - ERBB4	NRG	Secreted Signaling	KEGG: hsa04012	LS	0.203181	37.3257	23.2179	4.81927e-08	-0.84693	29.878	44.6697	0.000454406
266	Interneuron_S2	IP_IN	NRG2	ERBB4	7.66359e-07	0	NRG2_ERBB4	NRG2 - ERBB4	NRG	Secreted Signaling	KEGG: hsa04012	LS	0.609172	61.5789	39.4667	6.68542e-22	-0.84693	29.878	44.6697	0.000454406
267	Interneuron_M2	Interneuron_3	NRG2	ERBB4	4.43453e-05	0	NRG2_ERBB4	NRG2 - ERBB4	NRG	Secreted Signaling	KEGG: hsa04012	LS	0.188491	30.8333	18.9781	1.16745e-11	NA	NA	NA	NA
268	Layer_5-6_ExN	Interneuron_3	NRG2	ERBB4	4.41097e-05	0	NRG2_ERBB4	NRG2 - ERBB4	NRG	Secreted Signaling	KEGG: hsa04012	LS	0.129858	33.0368	25.2292	1.3165e-08	NA	NA	NA	NA
269	Interneuron_M1	Interneuron_3	NRG2	ERBB4	4.43689e-05	0	NRG2_ERBB4	NRG2 - ERBB4	NRG	Secreted Signaling	KEGG: hsa04012	LS	0.137098	32.866	22.9253	8.03122e-10	NA	NA	NA	NA
270	Layer_4-5_ExN	Interneuron_3	NRG2	ERBB4	4.40564e-05	0	NRG2_ERBB4	NRG2 - ERBB4	NRG	Secreted Signaling	KEGG: hsa04012	LS	0.203181	37.3257	23.2179	4.81927e-08	NA	NA	NA	NA
271	Interneuron_S2	Interneuron_3	NRG2	ERBB4	0.000181239	0	NRG2_ERBB4	NRG2 - ERBB4	NRG	Secreted Signaling	KEGG: hsa04012	LS	0.609172	61.5789	39.4667	6.68542e-22	NA	NA	NA	NA
272	Interneuron_M2	Interneuron_M1	NRG2	ERBB4	1.93293e-08	0	NRG2_ERBB4	NRG2 - ERBB4	NRG	Secreted Signaling	KEGG: hsa04012	LS	0.188491	30.8333	18.9781	1.16745e-11	0.161142	25.1558	40.8714	2.55184e-11
273	Layer_5-6_ExN	Interneuron_M1	NRG2	ERBB4	1.92266e-08	0	NRG2_ERBB4	NRG2 - ERBB4	NRG	Secreted Signaling	KEGG: hsa04012	LS	0.129858	33.0368	25.2292	1.3165e-08	0.161142	25.1558	40.8714	2.55184e-11
274	Interneuron_M1	Interneuron_M1	NRG2	ERBB4	1.93395e-08	0	NRG2_ERBB4	NRG2 - ERBB4	NRG	Secreted Signaling	KEGG: hsa04012	LS	0.137098	32.866	22.9253	8.03122e-10	0.161142	25.1558	40.8714	2.55184e-11
275	Layer_4-5_ExN	Interneuron_M1	NRG2	ERBB4	1.92033e-08	0	NRG2_ERBB4	NRG2 - ERBB4	NRG	Secreted Signaling	KEGG: hsa04012	LS	0.203181	37.3257	23.2179	4.81927e-08	0.161142	25.1558	40.8714	2.55184e-11
276	Interneuron_S2	Interneuron_M1	NRG2	ERBB4	7.90094e-08	0	NRG2_ERBB4	NRG2 - ERBB4	NRG	Secreted Signaling	KEGG: hsa04012	LS	0.609172	61.5789	39.4667	6.68542e-22	0.161142	25.1558	40.8714	2.55184e-11
277	Interneuron_M2	OPC_1	NRG2	ERBB4	4.20849e-06	0	NRG2_ERBB4	NRG2 - ERBB4	NRG	Secreted Signaling	KEGG: hsa04012	LS	0.188491	30.8333	18.9781	1.16745e-11	0.945734	86.8275	70.1107	1.79322e-06
278	Layer_5-6_ExN	OPC_1	NRG2	ERBB4	4.18613e-06	0	NRG2_ERBB4	NRG2 - ERBB4	NRG	Secreted Signaling	KEGG: hsa04012	LS	0.129858	33.0368	25.2292	1.3165e-08	0.945734	86.8275	70.1107	1.79322e-06
279	Interneuron_M1	OPC_1	NRG2	ERBB4	4.21073e-06	0	NRG2_ERBB4	NRG2 - ERBB4	NRG	Secreted Signaling	KEGG: hsa04012	LS	0.137098	32.866	22.9253	8.03122e-10	0.945734	86.8275	70.1107	1.79322e-06
280	Layer_4-5_ExN	OPC_1	NRG2	ERBB4	4.18107e-06	0	NRG2_ERBB4	NRG2 - ERBB4	NRG	Secreted Signaling	KEGG: hsa04012	LS	0.203181	37.3257	23.2179	4.81927e-08	0.945734	86.8275	70.1107	1.79322e-06
281	Interneuron_S2	OPC_1	NRG2	ERBB4	1.72022e-05	0	NRG2_ERBB4	NRG2 - ERBB4	NRG	Secreted Signaling	KEGG: hsa04012	LS	0.609172	61.5789	39.4667	6.68542e-22	0.945734	86.8275	70.1107	1.79322e-06
282	Interneuron_M2	Interneuron_S1	NRG2	ERBB4	1.33258e-05	0	NRG2_ERBB4	NRG2 - ERBB4	NRG	Secreted Signaling	KEGG: hsa04012	LS	0.188491	30.8333	18.9781	1.16745e-11	-3.02064	91.8587	92.1225	0.00161662
283	Layer_5-6_ExN	Interneuron_S1	NRG2	ERBB4	1.32549e-05	0	NRG2_ERBB4	NRG2 - ERBB4	NRG	Secreted Signaling	KEGG: hsa04012	LS	0.129858	33.0368	25.2292	1.3165e-08	-3.02064	91.8587	92.1225	0.00161662
284	Interneuron_M1	Interneuron_S1	NRG2	ERBB4	1.33328e-05	0	NRG2_ERBB4	NRG2 - ERBB4	NRG	Secreted Signaling	KEGG: hsa04012	LS	0.137098	32.866	22.9253	8.03122e-10	-3.02064	91.8587	92.1225	0.00161662
285	Layer_4-5_ExN	Interneuron_S1	NRG2	ERBB4	1.32389e-05	0	NRG2_ERBB4	NRG2 - ERBB4	NRG	Secreted Signaling	KEGG: hsa04012	LS	0.203181	37.3257	23.2179	4.81927e-08	-3.02064	91.8587	92.1225	0.00161662
286	Interneuron_S2	Interneuron_S1	NRG2	ERBB4	5.44675e-05	0	NRG2_ERBB4	NRG2 - ERBB4	NRG	Secreted Signaling	KEGG: hsa04012	LS	0.609172	61.5789	39.4667	6.68542e-22	-3.02064	91.8587	92.1225	0.00161662
287	Interneuron_M2	Interneuron_4	NRG2	ERBB4	1.4341e-05	0	NRG2_ERBB4	NRG2 - ERBB4	NRG	Secreted Signaling	KEGG: hsa04012	LS	0.188491	30.8333	18.9781	1.16745e-11	NA	NA	NA	NA
288	Layer_5-6_ExN	Interneuron_4	NRG2	ERBB4	1.42648e-05	0	NRG2_ERBB4	NRG2 - ERBB4	NRG	Secreted Signaling	KEGG: hsa04012	LS	0.129858	33.0368	25.2292	1.3165e-08	NA	NA	NA	NA
289	Interneuron_M1	Interneuron_4	NRG2	ERBB4	1.43486e-05	0	NRG2_ERBB4	NRG2 - ERBB4	NRG	Secreted Signaling	KEGG: hsa04012	LS	0.137098	32.866	22.9253	8.03122e-10	NA	NA	NA	NA
290	Layer_4-5_ExN	Interneuron_4	NRG2	ERBB4	1.42475e-05	0	NRG2_ERBB4	NRG2 - ERBB4	NRG	Secreted Signaling	KEGG: hsa04012	LS	0.203181	37.3257	23.2179	4.81927e-08	NA	NA	NA	NA
291	Interneuron_S2	Interneuron_4	NRG2	ERBB4	5.86169e-05	0	NRG2_ERBB4	NRG2 - ERBB4	NRG	Secreted Signaling	KEGG: hsa04012	LS	0.609172	61.5789	39.4667	6.68542e-22	NA	NA	NA	NA
292	Interneuron_M2	Astrocyte_progenitors	NRG2	ERBB4	9.57891e-06	0	NRG2_ERBB4	NRG2 - ERBB4	NRG	Secreted Signaling	KEGG: hsa04012	LS	0.188491	30.8333	18.9781	1.16745e-11	4.59006	86.6815	74.3662	2.15438e-55
293	Layer_5-6_ExN	Astrocyte_progenitors	NRG2	ERBB4	9.52801e-06	0	NRG2_ERBB4	NRG2 - ERBB4	NRG	Secreted Signaling	KEGG: hsa04012	LS	0.129858	33.0368	25.2292	1.3165e-08	4.59006	86.6815	74.3662	2.15438e-55
294	Interneuron_M1	Astrocyte_progenitors	NRG2	ERBB4	9.584e-06	0	NRG2_ERBB4	NRG2 - ERBB4	NRG	Secreted Signaling	KEGG: hsa04012	LS	0.137098	32.866	22.9253	8.03122e-10	4.59006	86.6815	74.3662	2.15438e-55
295	Layer_4-5_ExN	Astrocyte_progenitors	NRG2	ERBB4	9.51649e-06	0	NRG2_ERBB4	NRG2 - ERBB4	NRG	Secreted Signaling	KEGG: hsa04012	LS	0.203181	37.3257	23.2179	4.81927e-08	4.59006	86.6815	74.3662	2.15438e-55
296	Interneuron_S2	Astrocyte_progenitors	NRG2	ERBB4	3.91532e-05	0	NRG2_ERBB4	NRG2 - ERBB4	NRG	Secreted Signaling	KEGG: hsa04012	LS	0.609172	61.5789	39.4667	6.68542e-22	4.59006	86.6815	74.3662	2.15438e-55
297	Interneuron_M2	Interneuron_S2	NRG2	ERBB4	5.6894e-06	0	NRG2_ERBB4	NRG2 - ERBB4	NRG	Secreted Signaling	KEGG: hsa04012	LS	0.188491	30.8333	18.9781	1.16745e-11	8.69819	68.6842	44	6.87253e-34
298	Layer_5-6_ExN	Interneuron_S2	NRG2	ERBB4	5.65917e-06	0	NRG2_ERBB4	NRG2 - ERBB4	NRG	Secreted Signaling	KEGG: hsa04012	LS	0.129858	33.0368	25.2292	1.3165e-08	8.69819	68.6842	44	6.87253e-34
299	Interneuron_M1	Interneuron_S2	NRG2	ERBB4	5.69243e-06	0	NRG2_ERBB4	NRG2 - ERBB4	NRG	Secreted Signaling	KEGG: hsa04012	LS	0.137098	32.866	22.9253	8.03122e-10	8.69819	68.6842	44	6.87253e-34
300	Layer_4-5_ExN	Interneuron_S2	NRG2	ERBB4	5.65233e-06	0	NRG2_ERBB4	NRG2 - ERBB4	NRG	Secreted Signaling	KEGG: hsa04012	LS	0.203181	37.3257	23.2179	4.81927e-08	8.69819	68.6842	44	6.87253e-34
301	Interneuron_S2	Interneuron_S2	NRG2	ERBB4	2.32553e-05	0	NRG2_ERBB4	NRG2 - ERBB4	NRG	Secreted Signaling	KEGG: hsa04012	LS	0.609172	61.5789	39.4667	6.68542e-22	8.69819	68.6842	44	6.87253e-34
302	Interneuron_M2	OL	NRG2	ERBB4	1.65859e-06	0	NRG2_ERBB4	NRG2 - ERBB4	NRG	Secreted Signaling	KEGG: hsa04012	LS	0.188491	30.8333	18.9781	1.16745e-11	1.22216	66.6667	22.7273	2.0198e-06
303	Layer_5-6_ExN	OL	NRG2	ERBB4	1.64977e-06	0	NRG2_ERBB4	NRG2 - ERBB4	NRG	Secreted Signaling	KEGG: hsa04012	LS	0.129858	33.0368	25.2292	1.3165e-08	1.22216	66.6667	22.7273	2.0198e-06
304	Interneuron_M1	OL	NRG2	ERBB4	1.65947e-06	0	NRG2_ERBB4	NRG2 - ERBB4	NRG	Secreted Signaling	KEGG: hsa04012	LS	0.137098	32.866	22.9253	8.03122e-10	1.22216	66.6667	22.7273	2.0198e-06
305	Layer_4-5_ExN	OL	NRG2	ERBB4	1.64778e-06	0	NRG2_ERBB4	NRG2 - ERBB4	NRG	Secreted Signaling	KEGG: hsa04012	LS	0.203181	37.3257	23.2179	4.81927e-08	1.22216	66.6667	22.7273	2.0198e-06
306	Interneuron_S2	OL	NRG2	ERBB4	6.77953e-06	0	NRG2_ERBB4	NRG2 - ERBB4	NRG	Secreted Signaling	KEGG: hsa04012	LS	0.609172	61.5789	39.4667	6.68542e-22	1.22216	66.6667	22.7273	2.0198e-06
307	Layer_4-6_ExN	Interneuron_1	NRG3	ERBB4	0.00108767	0	NRG3_ERBB4	NRG3 - ERBB4	NRG	Secreted Signaling	KEGG: hsa04012	LS	1.68336	99.9202	97.2804	5.50656e-18	5.50962	88.9874	75.9783	3.02706e-62
308	Interneuron_1	Interneuron_1	NRG3	ERBB4	4.92383e-05	0	NRG3_ERBB4	NRG3 - ERBB4	NRG	Secreted Signaling	KEGG: hsa04012	LS	0.597523	56.6149	37.8085	3.47763e-45	5.50962	88.9874	75.9783	3.02706e-62
309	Interneuron_2	Interneuron_1	NRG3	ERBB4	8.45517e-05	0	NRG3_ERBB4	NRG3 - ERBB4	NRG	Secreted Signaling	KEGG: hsa04012	LS	2.50948	64.7257	33.512	8.47645e-194	5.50962	88.9874	75.9783	3.02706e-62
310	IP_IN	Interneuron_1	NRG3	ERBB4	5.50711e-05	0	NRG3_ERBB4	NRG3 - ERBB4	NRG	Secreted Signaling	KEGG: hsa04012	LS	0.293153	63.4146	46.3213	1.31686e-06	5.50962	88.9874	75.9783	3.02706e-62
311	Layer_5-6_ExN	Interneuron_1	NRG3	ERBB4	0.000798096	0	NRG3_ERBB4	NRG3 - ERBB4	NRG	Secreted Signaling	KEGG: hsa04012	LS	1.14173	98.4356	97.4331	3.17473e-10	5.50962	88.9874	75.9783	3.02706e-62
312	Interneuron_3	Interneuron_1	NRG3	ERBB4	0.000322222	0	NRG3_ERBB4	NRG3 - ERBB4	NRG	Secreted Signaling	KEGG: hsa04012	LS	2.19503	92.4224	85.422	2.88873e-17	5.50962	88.9874	75.9783	3.02706e-62
313	Mig_Layer_2-4_ExN	Interneuron_1	NRG3	ERBB4	0.000398585	0	NRG3_ERBB4	NRG3 - ERBB4	NRG	Secreted Signaling	KEGG: hsa04012	LS	1.47583	88.5778	85.2145	4.07744e-14	5.50962	88.9874	75.9783	3.02706e-62
314	OPC_1	Interneuron_1	NRG3	ERBB4	0.000158098	0	NRG3_ERBB4	NRG3 - ERBB4	NRG	Secreted Signaling	KEGG: hsa04012	LS	0.121251	84.4156	74.9077	0.000177807	5.50962	88.9874	75.9783	3.02706e-62
315	Layer_4-5_ExN	Interneuron_1	NRG3	ERBB4	0.00182489	0	NRG3_ERBB4	NRG3 - ERBB4	NRG	Secreted Signaling	KEGG: hsa04012	LS	6.99113	100	99.7963	3.70946e-20	5.50962	88.9874	75.9783	3.02706e-62
316	Layer_2-4_ExN	Interneuron_1	NRG3	ERBB4	0.00103144	0	NRG3_ERBB4	NRG3 - ERBB4	NRG	Secreted Signaling	KEGG: hsa04012	LS	1.90229	99.648	97.1422	1.21067e-44	5.50962	88.9874	75.9783	3.02706e-62
317	Interneuron_4	Interneuron_1	NRG3	ERBB4	0.00026954	0	NRG3_ERBB4	NRG3 - ERBB4	NRG	Secreted Signaling	KEGG: hsa04012	LS	2.13768	78.1513	65.7534	0.00177948	5.50962	88.9874	75.9783	3.02706e-62
318	Astrocyte_progenitors	Interneuron_1	NRG3	ERBB4	0.000833659	0	NRG3_ERBB4	NRG3 - ERBB4	NRG	Secreted Signaling	KEGG: hsa04012	LS	3.45134	94.3452	91.2676	7.00891e-08	5.50962	88.9874	75.9783	3.02706e-62
319	Interneuron_S2	Interneuron_1	NRG3	ERBB4	0.00168007	0	NRG3_ERBB4	NRG3 - ERBB4	NRG	Secreted Signaling	KEGG: hsa04012	LS	27.2276	98.3333	62.4	1.42521e-122	5.50962	88.9874	75.9783	3.02706e-62
320	OL	Interneuron_1	NRG3	ERBB4	7.08041e-05	0	NRG3_ERBB4	NRG3 - ERBB4	NRG	Secreted Signaling	KEGG: hsa04012	LS	0.122209	67.9487	45.4545	0.0219785	5.50962	88.9874	75.9783	3.02706e-62
321	Layer_4-6_ExN	Interneuron_2	NRG3	ERBB4	0.00245161	0	NRG3_ERBB4	NRG3 - ERBB4	NRG	Secreted Signaling	KEGG: hsa04012	LS	1.68336	99.9202	97.2804	5.50656e-18	9.14795	99.7113	94.6765	2.491e-97
322	Interneuron_1	Interneuron_2	NRG3	ERBB4	0.000111128	0	NRG3_ERBB4	NRG3 - ERBB4	NRG	Secreted Signaling	KEGG: hsa04012	LS	0.597523	56.6149	37.8085	3.47763e-45	9.14795	99.7113	94.6765	2.491e-97
323	Interneuron_2	Interneuron_2	NRG3	ERBB4	0.000190819	0	NRG3_ERBB4	NRG3 - ERBB4	NRG	Secreted Signaling	KEGG: hsa04012	LS	2.50948	64.7257	33.512	8.47645e-194	9.14795	99.7113	94.6765	2.491e-97
324	IP_IN	Interneuron_2	NRG3	ERBB4	0.000124291	0	NRG3_ERBB4	NRG3 - ERBB4	NRG	Secreted Signaling	KEGG: hsa04012	LS	0.293153	63.4146	46.3213	1.31686e-06	9.14795	99.7113	94.6765	2.491e-97
325	Layer_5-6_ExN	Interneuron_2	NRG3	ERBB4	0.00179956	0	NRG3_ERBB4	NRG3 - ERBB4	NRG	Secreted Signaling	KEGG: hsa04012	LS	1.14173	98.4356	97.4331	3.17473e-10	9.14795	99.7113	94.6765	2.491e-97
326	Interneuron_3	Interneuron_2	NRG3	ERBB4	0.000726984	0	NRG3_ERBB4	NRG3 - ERBB4	NRG	Secreted Signaling	KEGG: hsa04012	LS	2.19503	92.4224	85.422	2.88873e-17	9.14795	99.7113	94.6765	2.491e-97
327	Mig_Layer_2-4_ExN	Interneuron_2	NRG3	ERBB4	0.000899186	0	NRG3_ERBB4	NRG3 - ERBB4	NRG	Secreted Signaling	KEGG: hsa04012	LS	1.47583	88.5778	85.2145	4.07744e-14	9.14795	99.7113	94.6765	2.491e-97
328	OPC_1	Interneuron_2	NRG3	ERBB4	0.000356768	0	NRG3_ERBB4	NRG3 - ERBB4	NRG	Secreted Signaling	KEGG: hsa04012	LS	0.121251	84.4156	74.9077	0.000177807	9.14795	99.7113	94.6765	2.491e-97
329	Layer_4-5_ExN	Interneuron_2	NRG3	ERBB4	0.00410949	0	NRG3_ERBB4	NRG3 - ERBB4	NRG	Secreted Signaling	KEGG: hsa04012	LS	6.99113	100	99.7963	3.70946e-20	9.14795	99.7113	94.6765	2.491e-97
330	Layer_2-4_ExN	Interneuron_2	NRG3	ERBB4	0.00232501	0	NRG3_ERBB4	NRG3 - ERBB4	NRG	Secreted Signaling	KEGG: hsa04012	LS	1.90229	99.648	97.1422	1.21067e-44	9.14795	99.7113	94.6765	2.491e-97
331	Interneuron_4	Interneuron_2	NRG3	ERBB4	0.000608167	0	NRG3_ERBB4	NRG3 - ERBB4	NRG	Secreted Signaling	KEGG: hsa04012	LS	2.13768	78.1513	65.7534	0.00177948	9.14795	99.7113	94.6765	2.491e-97
332	Astrocyte_progenitors	Interneuron_2	NRG3	ERBB4	0.00187966	0	NRG3_ERBB4	NRG3 - ERBB4	NRG	Secreted Signaling	KEGG: hsa04012	LS	3.45134	94.3452	91.2676	7.00891e-08	9.14795	99.7113	94.6765	2.491e-97
333	Interneuron_S2	Interneuron_2	NRG3	ERBB4	0.00378404	0	NRG3_ERBB4	NRG3 - ERBB4	NRG	Secreted Signaling	KEGG: hsa04012	LS	27.2276	98.3333	62.4	1.42521e-122	9.14795	99.7113	94.6765	2.491e-97
334	OL	Interneuron_2	NRG3	ERBB4	0.000159796	0	NRG3_ERBB4	NRG3 - ERBB4	NRG	Secreted Signaling	KEGG: hsa04012	LS	0.122209	67.9487	45.4545	0.0219785	9.14795	99.7113	94.6765	2.491e-97
335	Layer_4-6_ExN	IP_IN	NRG3	ERBB4	1.36192e-05	0	NRG3_ERBB4	NRG3 - ERBB4	NRG	Secreted Signaling	KEGG: hsa04012	LS	1.68336	99.9202	97.2804	5.50656e-18	-0.84693	29.878	44.6697	0.000454406
336	Layer_5-6_ExN	IP_IN	NRG3	ERBB4	9.9904e-06	0	NRG3_ERBB4	NRG3 - ERBB4	NRG	Secreted Signaling	KEGG: hsa04012	LS	1.14173	98.4356	97.4331	3.17473e-10	-0.84693	29.878	44.6697	0.000454406
337	Interneuron_3	IP_IN	NRG3	ERBB4	4.03161e-06	0	NRG3_ERBB4	NRG3 - ERBB4	NRG	Secreted Signaling	KEGG: hsa04012	LS	2.19503	92.4224	85.422	2.88873e-17	-0.84693	29.878	44.6697	0.000454406
338	Mig_Layer_2-4_ExN	IP_IN	NRG3	ERBB4	4.98743e-06	0	NRG3_ERBB4	NRG3 - ERBB4	NRG	Secreted Signaling	KEGG: hsa04012	LS	1.47583	88.5778	85.2145	4.07744e-14	-0.84693	29.878	44.6697	0.000454406
339	OPC_1	IP_IN	NRG3	ERBB4	1.97778e-06	0	NRG3_ERBB4	NRG3 - ERBB4	NRG	Secreted Signaling	KEGG: hsa04012	LS	0.121251	84.4156	74.9077	0.000177807	-0.84693	29.878	44.6697	0.000454406
340	Layer_4-5_ExN	IP_IN	NRG3	ERBB4	2.28668e-05	0	NRG3_ERBB4	NRG3 - ERBB4	NRG	Secreted Signaling	KEGG: hsa04012	LS	6.99113	100	99.7963	3.70946e-20	-0.84693	29.878	44.6697	0.000454406
341	Layer_2-4_ExN	IP_IN	NRG3	ERBB4	1.29143e-05	0	NRG3_ERBB4	NRG3 - ERBB4	NRG	Secreted Signaling	KEGG: hsa04012	LS	1.90229	99.648	97.1422	1.21067e-44	-0.84693	29.878	44.6697	0.000454406
342	Interneuron_4	IP_IN	NRG3	ERBB4	3.37229e-06	0	NRG3_ERBB4	NRG3 - ERBB4	NRG	Secreted Signaling	KEGG: hsa04012	LS	2.13768	78.1513	65.7534	0.00177948	-0.84693	29.878	44.6697	0.000454406
343	Astrocyte_progenitors	IP_IN	NRG3	ERBB4	1.04359e-05	0	NRG3_ERBB4	NRG3 - ERBB4	NRG	Secreted Signaling	KEGG: hsa04012	LS	3.45134	94.3452	91.2676	7.00891e-08	-0.84693	29.878	44.6697	0.000454406
344	Interneuron_S2	IP_IN	NRG3	ERBB4	2.1049e-05	0	NRG3_ERBB4	NRG3 - ERBB4	NRG	Secreted Signaling	KEGG: hsa04012	LS	27.2276	98.3333	62.4	1.42521e-122	-0.84693	29.878	44.6697	0.000454406
345	Layer_4-6_ExN	Interneuron_3	NRG3	ERBB4	0.00321113	0	NRG3_ERBB4	NRG3 - ERBB4	NRG	Secreted Signaling	KEGG: hsa04012	LS	1.68336	99.9202	97.2804	5.50656e-18	NA	NA	NA	NA
346	Interneuron_1	Interneuron_3	NRG3	ERBB4	0.000145661	0	NRG3_ERBB4	NRG3 - ERBB4	NRG	Secreted Signaling	KEGG: hsa04012	LS	0.597523	56.6149	37.8085	3.47763e-45	NA	NA	NA	NA
347	Interneuron_2	Interneuron_3	NRG3	ERBB4	0.000250111	0	NRG3_ERBB4	NRG3 - ERBB4	NRG	Secreted Signaling	KEGG: hsa04012	LS	2.50948	64.7257	33.512	8.47645e-194	NA	NA	NA	NA
348	IP_IN	Interneuron_3	NRG3	ERBB4	0.000162915	0	NRG3_ERBB4	NRG3 - ERBB4	NRG	Secreted Signaling	KEGG: hsa04012	LS	0.293153	63.4146	46.3213	1.31686e-06	NA	NA	NA	NA
349	Layer_5-6_ExN	Interneuron_3	NRG3	ERBB4	0.00235755	0	NRG3_ERBB4	NRG3 - ERBB4	NRG	Secreted Signaling	KEGG: hsa04012	LS	1.14173	98.4356	97.4331	3.17473e-10	NA	NA	NA	NA
350	Interneuron_3	Interneuron_3	NRG3	ERBB4	0.000952717	0	NRG3_ERBB4	NRG3 - ERBB4	NRG	Secreted Signaling	KEGG: hsa04012	LS	2.19503	92.4224	85.422	2.88873e-17	NA	NA	NA	NA
351	Mig_Layer_2-4_ExN	Interneuron_3	NRG3	ERBB4	0.00117833	0	NRG3_ERBB4	NRG3 - ERBB4	NRG	Secreted Signaling	KEGG: hsa04012	LS	1.47583	88.5778	85.2145	4.07744e-14	NA	NA	NA	NA
352	OPC_1	Interneuron_3	NRG3	ERBB4	0.0004676	0	NRG3_ERBB4	NRG3 - ERBB4	NRG	Secreted Signaling	KEGG: hsa04012	LS	0.121251	84.4156	74.9077	0.000177807	NA	NA	NA	NA
353	Layer_4-5_ExN	Interneuron_3	NRG3	ERBB4	0.00537986	0	NRG3_ERBB4	NRG3 - ERBB4	NRG	Secreted Signaling	KEGG: hsa04012	LS	6.99113	100	99.7963	3.70946e-20	NA	NA	NA	NA
354	Layer_2-4_ExN	Interneuron_3	NRG3	ERBB4	0.00304543	0	NRG3_ERBB4	NRG3 - ERBB4	NRG	Secreted Signaling	KEGG: hsa04012	LS	1.90229	99.648	97.1422	1.21067e-44	NA	NA	NA	NA
355	Interneuron_4	Interneuron_3	NRG3	ERBB4	0.000797035	0	NRG3_ERBB4	NRG3 - ERBB4	NRG	Secreted Signaling	KEGG: hsa04012	LS	2.13768	78.1513	65.7534	0.00177948	NA	NA	NA	NA
356	Astrocyte_progenitors	Interneuron_3	NRG3	ERBB4	0.00246242	0	NRG3_ERBB4	NRG3 - ERBB4	NRG	Secreted Signaling	KEGG: hsa04012	LS	3.45134	94.3452	91.2676	7.00891e-08	NA	NA	NA	NA
357	Interneuron_S2	Interneuron_3	NRG3	ERBB4	0.0049543	0	NRG3_ERBB4	NRG3 - ERBB4	NRG	Secreted Signaling	KEGG: hsa04012	LS	27.2276	98.3333	62.4	1.42521e-122	NA	NA	NA	NA
358	OL	Interneuron_3	NRG3	ERBB4	0.000209451	0	NRG3_ERBB4	NRG3 - ERBB4	NRG	Secreted Signaling	KEGG: hsa04012	LS	0.122209	67.9487	45.4545	0.0219785	NA	NA	NA	NA
359	Layer_4-6_ExN	Interneuron_M1	NRG3	ERBB4	1.40411e-06	0	NRG3_ERBB4	NRG3 - ERBB4	NRG	Secreted Signaling	KEGG: hsa04012	LS	1.68336	99.9202	97.2804	5.50656e-18	0.161142	25.1558	40.8714	2.55184e-11
360	Interneuron_1	Interneuron_M1	NRG3	ERBB4	6.34974e-08	0.01	NRG3_ERBB4	NRG3 - ERBB4	NRG	Secreted Signaling	KEGG: hsa04012	LS	0.597523	56.6149	37.8085	3.47763e-45	0.161142	25.1558	40.8714	2.55184e-11
361	Interneuron_2	Interneuron_M1	NRG3	ERBB4	1.09041e-07	0.01	NRG3_ERBB4	NRG3 - ERBB4	NRG	Secreted Signaling	KEGG: hsa04012	LS	2.50948	64.7257	33.512	8.47645e-194	0.161142	25.1558	40.8714	2.55184e-11
362	IP_IN	Interneuron_M1	NRG3	ERBB4	7.10198e-08	0.01	NRG3_ERBB4	NRG3 - ERBB4	NRG	Secreted Signaling	KEGG: hsa04012	LS	0.293153	63.4146	46.3213	1.31686e-06	0.161142	25.1558	40.8714	2.55184e-11
363	Layer_5-6_ExN	Interneuron_M1	NRG3	ERBB4	1.02999e-06	0	NRG3_ERBB4	NRG3 - ERBB4	NRG	Secreted Signaling	KEGG: hsa04012	LS	1.14173	98.4356	97.4331	3.17473e-10	0.161142	25.1558	40.8714	2.55184e-11
364	Interneuron_3	Interneuron_M1	NRG3	ERBB4	4.15648e-07	0	NRG3_ERBB4	NRG3 - ERBB4	NRG	Secreted Signaling	KEGG: hsa04012	LS	2.19503	92.4224	85.422	2.88873e-17	0.161142	25.1558	40.8714	2.55184e-11
365	Mig_Layer_2-4_ExN	Interneuron_M1	NRG3	ERBB4	5.14192e-07	0	NRG3_ERBB4	NRG3 - ERBB4	NRG	Secreted Signaling	KEGG: hsa04012	LS	1.47583	88.5778	85.2145	4.07744e-14	0.161142	25.1558	40.8714	2.55184e-11
366	OPC_1	Interneuron_M1	NRG3	ERBB4	2.03904e-07	0	NRG3_ERBB4	NRG3 - ERBB4	NRG	Secreted Signaling	KEGG: hsa04012	LS	0.121251	84.4156	74.9077	0.000177807	0.161142	25.1558	40.8714	2.55184e-11
367	Layer_4-5_ExN	Interneuron_M1	NRG3	ERBB4	2.35755e-06	0	NRG3_ERBB4	NRG3 - ERBB4	NRG	Secreted Signaling	KEGG: hsa04012	LS	6.99113	100	99.7963	3.70946e-20	0.161142	25.1558	40.8714	2.55184e-11
368	Layer_2-4_ExN	Interneuron_M1	NRG3	ERBB4	1.33144e-06	0	NRG3_ERBB4	NRG3 - ERBB4	NRG	Secreted Signaling	KEGG: hsa04012	LS	1.90229	99.648	97.1422	1.21067e-44	0.161142	25.1558	40.8714	2.55184e-11
369	Interneuron_4	Interneuron_M1	NRG3	ERBB4	3.47674e-07	0	NRG3_ERBB4	NRG3 - ERBB4	NRG	Secreted Signaling	KEGG: hsa04012	LS	2.13768	78.1513	65.7534	0.00177948	0.161142	25.1558	40.8714	2.55184e-11
370	Astrocyte_progenitors	Interneuron_M1	NRG3	ERBB4	1.07592e-06	0	NRG3_ERBB4	NRG3 - ERBB4	NRG	Secreted Signaling	KEGG: hsa04012	LS	3.45134	94.3452	91.2676	7.00891e-08	0.161142	25.1558	40.8714	2.55184e-11
371	Interneuron_S2	Interneuron_M1	NRG3	ERBB4	2.17014e-06	0	NRG3_ERBB4	NRG3 - ERBB4	NRG	Secreted Signaling	KEGG: hsa04012	LS	27.2276	98.3333	62.4	1.42521e-122	0.161142	25.1558	40.8714	2.55184e-11
372	OL	Interneuron_M1	NRG3	ERBB4	9.13105e-08	0.01	NRG3_ERBB4	NRG3 - ERBB4	NRG	Secreted Signaling	KEGG: hsa04012	LS	0.122209	67.9487	45.4545	0.0219785	0.161142	25.1558	40.8714	2.55184e-11
373	Layer_4-6_ExN	OPC_1	NRG3	ERBB4	0.000305621	0	NRG3_ERBB4	NRG3 - ERBB4	NRG	Secreted Signaling	KEGG: hsa04012	LS	1.68336	99.9202	97.2804	5.50656e-18	0.945734	86.8275	70.1107	1.79322e-06
374	Interneuron_1	OPC_1	NRG3	ERBB4	1.38249e-05	0	NRG3_ERBB4	NRG3 - ERBB4	NRG	Secreted Signaling	KEGG: hsa04012	LS	0.597523	56.6149	37.8085	3.47763e-45	0.945734	86.8275	70.1107	1.79322e-06
375	Interneuron_2	OPC_1	NRG3	ERBB4	2.37407e-05	0	NRG3_ERBB4	NRG3 - ERBB4	NRG	Secreted Signaling	KEGG: hsa04012	LS	2.50948	64.7257	33.512	8.47645e-194	0.945734	86.8275	70.1107	1.79322e-06
376	IP_IN	OPC_1	NRG3	ERBB4	1.54627e-05	0	NRG3_ERBB4	NRG3 - ERBB4	NRG	Secreted Signaling	KEGG: hsa04012	LS	0.293153	63.4146	46.3213	1.31686e-06	0.945734	86.8275	70.1107	1.79322e-06
377	Layer_5-6_ExN	OPC_1	NRG3	ERBB4	0.000224207	0	NRG3_ERBB4	NRG3 - ERBB4	NRG	Secreted Signaling	KEGG: hsa04012	LS	1.14173	98.4356	97.4331	3.17473e-10	0.945734	86.8275	70.1107	1.79322e-06
378	Interneuron_3	OPC_1	NRG3	ERBB4	9.04899e-05	0	NRG3_ERBB4	NRG3 - ERBB4	NRG	Secreted Signaling	KEGG: hsa04012	LS	2.19503	92.4224	85.422	2.88873e-17	0.945734	86.8275	70.1107	1.79322e-06
379	Mig_Layer_2-4_ExN	OPC_1	NRG3	ERBB4	0.000111941	0	NRG3_ERBB4	NRG3 - ERBB4	NRG	Secreted Signaling	KEGG: hsa04012	LS	1.47583	88.5778	85.2145	4.07744e-14	0.945734	86.8275	70.1107	1.79322e-06
380	OPC_1	OPC_1	NRG3	ERBB4	4.43936e-05	0	NRG3_ERBB4	NRG3 - ERBB4	NRG	Secreted Signaling	KEGG: hsa04012	LS	0.121251	84.4156	74.9077	0.000177807	0.945734	86.8275	70.1107	1.79322e-06
381	Layer_4-5_ExN	OPC_1	NRG3	ERBB4	0.000513041	0	NRG3_ERBB4	NRG3 - ERBB4	NRG	Secreted Signaling	KEGG: hsa04012	LS	6.99113	100	99.7963	3.70946e-20	0.945734	86.8275	70.1107	1.79322e-06
382	Layer_2-4_ExN	OPC_1	NRG3	ERBB4	0.000289807	0	NRG3_ERBB4	NRG3 - ERBB4	NRG	Secreted Signaling	KEGG: hsa04012	LS	1.90229	99.648	97.1422	1.21067e-44	0.945734	86.8275	70.1107	1.79322e-06
383	Interneuron_4	OPC_1	NRG3	ERBB4	7.56924e-05	0	NRG3_ERBB4	NRG3 - ERBB4	NRG	Secreted Signaling	KEGG: hsa04012	LS	2.13768	78.1513	65.7534	0.00177948	0.945734	86.8275	70.1107	1.79322e-06
384	Astrocyte_progenitors	OPC_1	NRG3	ERBB4	0.000234203	0	NRG3_ERBB4	NRG3 - ERBB4	NRG	Secreted Signaling	KEGG: hsa04012	LS	3.45134	94.3452	91.2676	7.00891e-08	0.945734	86.8275	70.1107	1.79322e-06
385	Interneuron_S2	OPC_1	NRG3	ERBB4	0.000472276	0	NRG3_ERBB4	NRG3 - ERBB4	NRG	Secreted Signaling	KEGG: hsa04012	LS	27.2276	98.3333	62.4	1.42521e-122	0.945734	86.8275	70.1107	1.79322e-06
386	OL	OPC_1	NRG3	ERBB4	1.98804e-05	0	NRG3_ERBB4	NRG3 - ERBB4	NRG	Secreted Signaling	KEGG: hsa04012	LS	0.122209	67.9487	45.4545	0.0219785	0.945734	86.8275	70.1107	1.79322e-06
387	Layer_4-6_ExN	Interneuron_S1	NRG3	ERBB4	0.000967086	0	NRG3_ERBB4	NRG3 - ERBB4	NRG	Secreted Signaling	KEGG: hsa04012	LS	1.68336	99.9202	97.2804	5.50656e-18	-3.02064	91.8587	92.1225	0.00161662
388	Interneuron_1	Interneuron_S1	NRG3	ERBB4	4.37743e-05	0	NRG3_ERBB4	NRG3 - ERBB4	NRG	Secreted Signaling	KEGG: hsa04012	LS	0.597523	56.6149	37.8085	3.47763e-45	-3.02064	91.8587	92.1225	0.00161662
389	Interneuron_2	Interneuron_S1	NRG3	ERBB4	7.51693e-05	0	NRG3_ERBB4	NRG3 - ERBB4	NRG	Secreted Signaling	KEGG: hsa04012	LS	2.50948	64.7257	33.512	8.47645e-194	-3.02064	91.8587	92.1225	0.00161662
390	IP_IN	Interneuron_S1	NRG3	ERBB4	4.89599e-05	0	NRG3_ERBB4	NRG3 - ERBB4	NRG	Secreted Signaling	KEGG: hsa04012	LS	0.293153	63.4146	46.3213	1.31686e-06	-3.02064	91.8587	92.1225	0.00161662
391	Layer_5-6_ExN	Interneuron_S1	NRG3	ERBB4	0.00070959	0	NRG3_ERBB4	NRG3 - ERBB4	NRG	Secreted Signaling	KEGG: hsa04012	LS	1.14173	98.4356	97.4331	3.17473e-10	-3.02064	91.8587	92.1225	0.00161662
392	Interneuron_3	Interneuron_S1	NRG3	ERBB4	0.000286473	0	NRG3_ERBB4	NRG3 - ERBB4	NRG	Secreted Signaling	KEGG: hsa04012	LS	2.19503	92.4224	85.422	2.88873e-17	-3.02064	91.8587	92.1225	0.00161662
393	Mig_Layer_2-4_ExN	Interneuron_S1	NRG3	ERBB4	0.000354368	0	NRG3_ERBB4	NRG3 - ERBB4	NRG	Secreted Signaling	KEGG: hsa04012	LS	1.47583	88.5778	85.2145	4.07744e-14	-3.02064	91.8587	92.1225	0.00161662
394	OPC_1	Interneuron_S1	NRG3	ERBB4	0.000140555	0	NRG3_ERBB4	NRG3 - ERBB4	NRG	Secreted Signaling	KEGG: hsa04012	LS	0.121251	84.4156	74.9077	0.000177807	-3.02064	91.8587	92.1225	0.00161662
395	Layer_4-5_ExN	Interneuron_S1	NRG3	ERBB4	0.0016227	0	NRG3_ERBB4	NRG3 - ERBB4	NRG	Secreted Signaling	KEGG: hsa04012	LS	6.99113	100	99.7963	3.70946e-20	-3.02064	91.8587	92.1225	0.00161662
396	Layer_2-4_ExN	Interneuron_S1	NRG3	ERBB4	0.000917076	0	NRG3_ERBB4	NRG3 - ERBB4	NRG	Secreted Signaling	KEGG: hsa04012	LS	1.90229	99.648	97.1422	1.21067e-44	-3.02064	91.8587	92.1225	0.00161662
397	Interneuron_4	Interneuron_S1	NRG3	ERBB4	0.000239635	0	NRG3_ERBB4	NRG3 - ERBB4	NRG	Secreted Signaling	KEGG: hsa04012	LS	2.13768	78.1513	65.7534	0.00177948	-3.02064	91.8587	92.1225	0.00161662
398	Astrocyte_progenitors	Interneuron_S1	NRG3	ERBB4	0.000741212	0	NRG3_ERBB4	NRG3 - ERBB4	NRG	Secreted Signaling	KEGG: hsa04012	LS	3.45134	94.3452	91.2676	7.00891e-08	-3.02064	91.8587	92.1225	0.00161662
399	Interneuron_S2	Interneuron_S1	NRG3	ERBB4	0.0014939	0	NRG3_ERBB4	NRG3 - ERBB4	NRG	Secreted Signaling	KEGG: hsa04012	LS	27.2276	98.3333	62.4	1.42521e-122	-3.02064	91.8587	92.1225	0.00161662
400	OL	Interneuron_S1	NRG3	ERBB4	6.29471e-05	0	NRG3_ERBB4	NRG3 - ERBB4	NRG	Secreted Signaling	KEGG: hsa04012	LS	0.122209	67.9487	45.4545	0.0219785	-3.02064	91.8587	92.1225	0.00161662
401	Layer_4-6_ExN	Interneuron_4	NRG3	ERBB4	0.00104069	0	NRG3_ERBB4	NRG3 - ERBB4	NRG	Secreted Signaling	KEGG: hsa04012	LS	1.68336	99.9202	97.2804	5.50656e-18	NA	NA	NA	NA
402	Interneuron_1	Interneuron_4	NRG3	ERBB4	4.71091e-05	0	NRG3_ERBB4	NRG3 - ERBB4	NRG	Secreted Signaling	KEGG: hsa04012	LS	0.597523	56.6149	37.8085	3.47763e-45	NA	NA	NA	NA
403	Interneuron_2	Interneuron_4	NRG3	ERBB4	8.08956e-05	0	NRG3_ERBB4	NRG3 - ERBB4	NRG	Secreted Signaling	KEGG: hsa04012	LS	2.50948	64.7257	33.512	8.47645e-194	NA	NA	NA	NA
404	IP_IN	Interneuron_4	NRG3	ERBB4	5.26898e-05	0	NRG3_ERBB4	NRG3 - ERBB4	NRG	Secreted Signaling	KEGG: hsa04012	LS	0.293153	63.4146	46.3213	1.31686e-06	NA	NA	NA	NA
405	Layer_5-6_ExN	Interneuron_4	NRG3	ERBB4	0.000763609	0	NRG3_ERBB4	NRG3 - ERBB4	NRG	Secreted Signaling	KEGG: hsa04012	LS	1.14173	98.4356	97.4331	3.17473e-10	NA	NA	NA	NA
406	Interneuron_3	Interneuron_4	NRG3	ERBB4	0.000308292	0	NRG3_ERBB4	NRG3 - ERBB4	NRG	Secreted Signaling	KEGG: hsa04012	LS	2.19503	92.4224	85.422	2.88873e-17	NA	NA	NA	NA
407	Mig_Layer_2-4_ExN	Interneuron_4	NRG3	ERBB4	0.000381355	0	NRG3_ERBB4	NRG3 - ERBB4	NRG	Secreted Signaling	KEGG: hsa04012	LS	1.47583	88.5778	85.2145	4.07744e-14	NA	NA	NA	NA
408	OPC_1	Interneuron_4	NRG3	ERBB4	0.000151262	0	NRG3_ERBB4	NRG3 - ERBB4	NRG	Secreted Signaling	KEGG: hsa04012	LS	0.121251	84.4156	74.9077	0.000177807	NA	NA	NA	NA
409	Layer_4-5_ExN	Interneuron_4	NRG3	ERBB4	0.00174611	0	NRG3_ERBB4	NRG3 - ERBB4	NRG	Secreted Signaling	KEGG: hsa04012	LS	6.99113	100	99.7963	3.70946e-20	NA	NA	NA	NA
410	Layer_2-4_ExN	Interneuron_4	NRG3	ERBB4	0.000986876	0	NRG3_ERBB4	NRG3 - ERBB4	NRG	Secreted Signaling	KEGG: hsa04012	LS	1.90229	99.648	97.1422	1.21067e-44	NA	NA	NA	NA
411	Interneuron_4	Interneuron_4	NRG3	ERBB4	0.000257887	0	NRG3_ERBB4	NRG3 - ERBB4	NRG	Secreted Signaling	KEGG: hsa04012	LS	2.13768	78.1513	65.7534	0.00177948	NA	NA	NA	NA
412	Astrocyte_progenitors	Interneuron_4	NRG3	ERBB4	0.000797636	0	NRG3_ERBB4	NRG3 - ERBB4	NRG	Secreted Signaling	KEGG: hsa04012	LS	3.45134	94.3452	91.2676	7.00891e-08	NA	NA	NA	NA
413	Interneuron_S2	Interneuron_4	NRG3	ERBB4	0.00160753	0	NRG3_ERBB4	NRG3 - ERBB4	NRG	Secreted Signaling	KEGG: hsa04012	LS	27.2276	98.3333	62.4	1.42521e-122	NA	NA	NA	NA
414	OL	Interneuron_4	NRG3	ERBB4	6.77425e-05	0	NRG3_ERBB4	NRG3 - ERBB4	NRG	Secreted Signaling	KEGG: hsa04012	LS	0.122209	67.9487	45.4545	0.0219785	NA	NA	NA	NA
415	Layer_4-6_ExN	Astrocyte_progenitors	NRG3	ERBB4	0.000695353	0	NRG3_ERBB4	NRG3 - ERBB4	NRG	Secreted Signaling	KEGG: hsa04012	LS	1.68336	99.9202	97.2804	5.50656e-18	4.59006	86.6815	74.3662	2.15438e-55
416	Interneuron_1	Astrocyte_progenitors	NRG3	ERBB4	3.14664e-05	0	NRG3_ERBB4	NRG3 - ERBB4	NRG	Secreted Signaling	KEGG: hsa04012	LS	0.597523	56.6149	37.8085	3.47763e-45	4.59006	86.6815	74.3662	2.15438e-55
417	Interneuron_2	Astrocyte_progenitors	NRG3	ERBB4	5.40346e-05	0	NRG3_ERBB4	NRG3 - ERBB4	NRG	Secreted Signaling	KEGG: hsa04012	LS	2.50948	64.7257	33.512	8.47645e-194	4.59006	86.6815	74.3662	2.15438e-55
418	IP_IN	Astrocyte_progenitors	NRG3	ERBB4	3.5194e-05	0	NRG3_ERBB4	NRG3 - ERBB4	NRG	Secreted Signaling	KEGG: hsa04012	LS	0.293153	63.4146	46.3213	1.31686e-06	4.59006	86.6815	74.3662	2.15438e-55
419	Layer_5-6_ExN	Astrocyte_progenitors	NRG3	ERBB4	0.000510172	0	NRG3_ERBB4	NRG3 - ERBB4	NRG	Secreted Signaling	KEGG: hsa04012	LS	1.14173	98.4356	97.4331	3.17473e-10	4.59006	86.6815	74.3662	2.15438e-55
420	Interneuron_3	Astrocyte_progenitors	NRG3	ERBB4	0.00020594	0	NRG3_ERBB4	NRG3 - ERBB4	NRG	Secreted Signaling	KEGG: hsa04012	LS	2.19503	92.4224	85.422	2.88873e-17	4.59006	86.6815	74.3662	2.15438e-55
421	Mig_Layer_2-4_ExN	Astrocyte_progenitors	NRG3	ERBB4	0.000254753	0	NRG3_ERBB4	NRG3 - ERBB4	NRG	Secreted Signaling	KEGG: hsa04012	LS	1.47583	88.5778	85.2145	4.07744e-14	4.59006	86.6815	74.3662	2.15438e-55
422	OPC_1	Astrocyte_progenitors	NRG3	ERBB4	0.000101039	0	NRG3_ERBB4	NRG3 - ERBB4	NRG	Secreted Signaling	KEGG: hsa04012	LS	0.121251	84.4156	74.9077	0.000177807	4.59006	86.6815	74.3662	2.15438e-55
423	Layer_4-5_ExN	Astrocyte_progenitors	NRG3	ERBB4	0.00116697	0	NRG3_ERBB4	NRG3 - ERBB4	NRG	Secreted Signaling	KEGG: hsa04012	LS	6.99113	100	99.7963	3.70946e-20	4.59006	86.6815	74.3662	2.15438e-55
424	Layer_2-4_ExN	Astrocyte_progenitors	NRG3	ERBB4	0.000659386	0	NRG3_ERBB4	NRG3 - ERBB4	NRG	Secreted Signaling	KEGG: hsa04012	LS	1.90229	99.648	97.1422	1.21067e-44	4.59006	86.6815	74.3662	2.15438e-55
425	Interneuron_4	Astrocyte_progenitors	NRG3	ERBB4	0.000172267	0	NRG3_ERBB4	NRG3 - ERBB4	NRG	Secreted Signaling	KEGG: hsa04012	LS	2.13768	78.1513	65.7534	0.00177948	4.59006	86.6815	74.3662	2.15438e-55
426	Astrocyte_progenitors	Astrocyte_progenitors	NRG3	ERBB4	0.000532912	0	NRG3_ERBB4	NRG3 - ERBB4	NRG	Secreted Signaling	KEGG: hsa04012	LS	3.45134	94.3452	91.2676	7.00891e-08	4.59006	86.6815	74.3662	2.15438e-55
427	Interneuron_S2	Astrocyte_progenitors	NRG3	ERBB4	0.0010743	0	NRG3_ERBB4	NRG3 - ERBB4	NRG	Secreted Signaling	KEGG: hsa04012	LS	27.2276	98.3333	62.4	1.42521e-122	4.59006	86.6815	74.3662	2.15438e-55
428	OL	Astrocyte_progenitors	NRG3	ERBB4	4.52487e-05	0	NRG3_ERBB4	NRG3 - ERBB4	NRG	Secreted Signaling	KEGG: hsa04012	LS	0.122209	67.9487	45.4545	0.0219785	4.59006	86.6815	74.3662	2.15438e-55
429	Layer_4-6_ExN	Interneuron_S2	NRG3	ERBB4	0.000413121	0	NRG3_ERBB4	NRG3 - ERBB4	NRG	Secreted Signaling	KEGG: hsa04012	LS	1.68336	99.9202	97.2804	5.50656e-18	8.69819	68.6842	44	6.87253e-34
430	Interneuron_1	Interneuron_S2	NRG3	ERBB4	1.86897e-05	0	NRG3_ERBB4	NRG3 - ERBB4	NRG	Secreted Signaling	KEGG: hsa04012	LS	0.597523	56.6149	37.8085	3.47763e-45	8.69819	68.6842	44	6.87253e-34
431	Interneuron_2	Interneuron_S2	NRG3	ERBB4	3.20945e-05	0	NRG3_ERBB4	NRG3 - ERBB4	NRG	Secreted Signaling	KEGG: hsa04012	LS	2.50948	64.7257	33.512	8.47645e-194	8.69819	68.6842	44	6.87253e-34
432	IP_IN	Interneuron_S2	NRG3	ERBB4	2.09038e-05	0	NRG3_ERBB4	NRG3 - ERBB4	NRG	Secreted Signaling	KEGG: hsa04012	LS	0.293153	63.4146	46.3213	1.31686e-06	8.69819	68.6842	44	6.87253e-34
433	Layer_5-6_ExN	Interneuron_S2	NRG3	ERBB4	0.000303079	0	NRG3_ERBB4	NRG3 - ERBB4	NRG	Secreted Signaling	KEGG: hsa04012	LS	1.14173	98.4356	97.4331	3.17473e-10	8.69819	68.6842	44	6.87253e-34
434	Interneuron_3	Interneuron_S2	NRG3	ERBB4	0.000122328	0	NRG3_ERBB4	NRG3 - ERBB4	NRG	Secreted Signaling	KEGG: hsa04012	LS	2.19503	92.4224	85.422	2.88873e-17	8.69819	68.6842	44	6.87253e-34
435	Mig_Layer_2-4_ExN	Interneuron_S2	NRG3	ERBB4	0.000151326	0	NRG3_ERBB4	NRG3 - ERBB4	NRG	Secreted Signaling	KEGG: hsa04012	LS	1.47583	88.5778	85.2145	4.07744e-14	8.69819	68.6842	44	6.87253e-34
436	OPC_1	Interneuron_S2	NRG3	ERBB4	6.00142e-05	0	NRG3_ERBB4	NRG3 - ERBB4	NRG	Secreted Signaling	KEGG: hsa04012	LS	0.121251	84.4156	74.9077	0.000177807	8.69819	68.6842	44	6.87253e-34
437	Layer_4-5_ExN	Interneuron_S2	NRG3	ERBB4	0.000693449	0	NRG3_ERBB4	NRG3 - ERBB4	NRG	Secreted Signaling	KEGG: hsa04012	LS	6.99113	100	99.7963	3.70946e-20	8.69819	68.6842	44	6.87253e-34
438	Layer_2-4_ExN	Interneuron_S2	NRG3	ERBB4	0.000391747	0	NRG3_ERBB4	NRG3 - ERBB4	NRG	Secreted Signaling	KEGG: hsa04012	LS	1.90229	99.648	97.1422	1.21067e-44	8.69819	68.6842	44	6.87253e-34
439	Interneuron_4	Interneuron_S2	NRG3	ERBB4	0.000102325	0	NRG3_ERBB4	NRG3 - ERBB4	NRG	Secreted Signaling	KEGG: hsa04012	LS	2.13768	78.1513	65.7534	0.00177948	8.69819	68.6842	44	6.87253e-34
440	Astrocyte_progenitors	Interneuron_S2	NRG3	ERBB4	0.000316591	0	NRG3_ERBB4	NRG3 - ERBB4	NRG	Secreted Signaling	KEGG: hsa04012	LS	3.45134	94.3452	91.2676	7.00891e-08	8.69819	68.6842	44	6.87253e-34
441	Interneuron_S2	Interneuron_S2	NRG3	ERBB4	0.000638358	0	NRG3_ERBB4	NRG3 - ERBB4	NRG	Secreted Signaling	KEGG: hsa04012	LS	27.2276	98.3333	62.4	1.42521e-122	8.69819	68.6842	44	6.87253e-34
442	OL	Interneuron_S2	NRG3	ERBB4	2.68759e-05	0	NRG3_ERBB4	NRG3 - ERBB4	NRG	Secreted Signaling	KEGG: hsa04012	LS	0.122209	67.9487	45.4545	0.0219785	8.69819	68.6842	44	6.87253e-34
443	Layer_4-6_ExN	OL	NRG3	ERBB4	0.000120469	0	NRG3_ERBB4	NRG3 - ERBB4	NRG	Secreted Signaling	KEGG: hsa04012	LS	1.68336	99.9202	97.2804	5.50656e-18	1.22216	66.6667	22.7273	2.0198e-06
444	Interneuron_1	OL	NRG3	ERBB4	5.4485e-06	0	NRG3_ERBB4	NRG3 - ERBB4	NRG	Secreted Signaling	KEGG: hsa04012	LS	0.597523	56.6149	37.8085	3.47763e-45	1.22216	66.6667	22.7273	2.0198e-06
445	Interneuron_2	OL	NRG3	ERBB4	9.35642e-06	0	NRG3_ERBB4	NRG3 - ERBB4	NRG	Secreted Signaling	KEGG: hsa04012	LS	2.50948	64.7257	33.512	8.47645e-194	1.22216	66.6667	22.7273	2.0198e-06
446	IP_IN	OL	NRG3	ERBB4	6.09397e-06	0	NRG3_ERBB4	NRG3 - ERBB4	NRG	Secreted Signaling	KEGG: hsa04012	LS	0.293153	63.4146	46.3213	1.31686e-06	1.22216	66.6667	22.7273	2.0198e-06
447	Layer_5-6_ExN	OL	NRG3	ERBB4	8.83727e-05	0	NRG3_ERBB4	NRG3 - ERBB4	NRG	Secreted Signaling	KEGG: hsa04012	LS	1.14173	98.4356	97.4331	3.17473e-10	1.22216	66.6667	22.7273	2.0198e-06
448	Interneuron_3	OL	NRG3	ERBB4	3.56643e-05	0	NRG3_ERBB4	NRG3 - ERBB4	NRG	Secreted Signaling	KEGG: hsa04012	LS	2.19503	92.4224	85.422	2.88873e-17	1.22216	66.6667	22.7273	2.0198e-06
449	Mig_Layer_2-4_ExN	OL	NRG3	ERBB4	4.41194e-05	0	NRG3_ERBB4	NRG3 - ERBB4	NRG	Secreted Signaling	KEGG: hsa04012	LS	1.47583	88.5778	85.2145	4.07744e-14	1.22216	66.6667	22.7273	2.0198e-06
450	OPC_1	OL	NRG3	ERBB4	1.74961e-05	0	NRG3_ERBB4	NRG3 - ERBB4	NRG	Secreted Signaling	KEGG: hsa04012	LS	0.121251	84.4156	74.9077	0.000177807	1.22216	66.6667	22.7273	2.0198e-06
451	Layer_4-5_ExN	OL	NRG3	ERBB4	0.000202254	0	NRG3_ERBB4	NRG3 - ERBB4	NRG	Secreted Signaling	KEGG: hsa04012	LS	6.99113	100	99.7963	3.70946e-20	1.22216	66.6667	22.7273	2.0198e-06
452	Layer_2-4_ExN	OL	NRG3	ERBB4	0.000114234	0	NRG3_ERBB4	NRG3 - ERBB4	NRG	Secreted Signaling	KEGG: hsa04012	LS	1.90229	99.648	97.1422	1.21067e-44	1.22216	66.6667	22.7273	2.0198e-06
453	Interneuron_4	OL	NRG3	ERBB4	2.9832e-05	0	NRG3_ERBB4	NRG3 - ERBB4	NRG	Secreted Signaling	KEGG: hsa04012	LS	2.13768	78.1513	65.7534	0.00177948	1.22216	66.6667	22.7273	2.0198e-06
454	Astrocyte_progenitors	OL	NRG3	ERBB4	9.23135e-05	0	NRG3_ERBB4	NRG3 - ERBB4	NRG	Secreted Signaling	KEGG: hsa04012	LS	3.45134	94.3452	91.2676	7.00891e-08	1.22216	66.6667	22.7273	2.0198e-06
455	Interneuron_S2	OL	NRG3	ERBB4	0.000186179	0	NRG3_ERBB4	NRG3 - ERBB4	NRG	Secreted Signaling	KEGG: hsa04012	LS	27.2276	98.3333	62.4	1.42521e-122	1.22216	66.6667	22.7273	2.0198e-06
456	OL	OL	NRG3	ERBB4	7.83503e-06	0	NRG3_ERBB4	NRG3 - ERBB4	NRG	Secreted Signaling	KEGG: hsa04012	LS	0.122209	67.9487	45.4545	0.0219785	1.22216	66.6667	22.7273	2.0198e-06
457	Interneuron_2	OPC_1	PDGFC	PDGFRA	2.52439e-06	0	PDGFC_PDGFRA	PDGFC - PDGFRA	PDGF	Secreted Signaling	PMID: 15207812	LS	0.172335	26.8527	16.9316	2.31623e-23	NA	NA	NA	NA
458	Layer_2-4_ExN	OPC_1	PDGFC	PDGFRA	2.98209e-06	0	PDGFC_PDGFRA	PDGFC - PDGFRA	PDGF	Secreted Signaling	PMID: 15207812	LS	0.215828	44.7202	34.5139	8.76239e-22	NA	NA	NA	NA
459	Interneuron_4	Layer_4-6_ExN	IGF1	IGF1R	2.20602e-06	0	IGF1_IGF1R	IGF1 - IGF1R	IGF	Secreted Signaling	PMID: 14604834	LS	0.220417	26.0504	13.6986	0.0295228	NA	NA	NA	NA
460	Interneuron_4	oRG	IGF1	IGF1R	8.55506e-07	0	IGF1_IGF1R	IGF1 - IGF1R	IGF	Secreted Signaling	PMID: 14604834	LS	0.220417	26.0504	13.6986	0.0295228	-0.194705	61.6989	64.3922	7.9647e-09
461	Interneuron_4	IP	IGF1	IGF1R	9.46796e-07	0	IGF1_IGF1R	IGF1 - IGF1R	IGF	Secreted Signaling	PMID: 14604834	LS	0.220417	26.0504	13.6986	0.0295228	-0.288612	65.7038	69.4769	2.27751e-18
462	Interneuron_4	Interneuron_1	IGF1	IGF1R	1.03709e-06	0	IGF1_IGF1R	IGF1 - IGF1R	IGF	Secreted Signaling	PMID: 14604834	LS	0.220417	26.0504	13.6986	0.0295228	NA	NA	NA	NA
463	Interneuron_4	Mig_Layer_2-3_ExN	IGF1	IGF1R	1.44625e-06	0	IGF1_IGF1R	IGF1 - IGF1R	IGF	Secreted Signaling	PMID: 14604834	LS	0.220417	26.0504	13.6986	0.0295228	-0.276566	77.3768	77.7102	2.23197e-22
464	Interneuron_4	Interneuron_2	IGF1	IGF1R	1.02522e-06	0	IGF1_IGF1R	IGF1 - IGF1R	IGF	Secreted Signaling	PMID: 14604834	LS	0.220417	26.0504	13.6986	0.0295228	-0.285502	72.5217	75.1017	0.00669124
465	Interneuron_4	Interneuron_M2	IGF1	IGF1R	9.79229e-07	0	IGF1_IGF1R	IGF1 - IGF1R	IGF	Secreted Signaling	PMID: 14604834	LS	0.220417	26.0504	13.6986	0.0295228	-0.331456	67.3611	71.5328	0.00269414
466	Interneuron_4	IP_IN	IGF1	IGF1R	1.03419e-06	0	IGF1_IGF1R	IGF1 - IGF1R	IGF	Secreted Signaling	PMID: 14604834	LS	0.220417	26.0504	13.6986	0.0295228	NA	NA	NA	NA
467	Interneuron_4	Layer_5-6_ExN	IGF1	IGF1R	1.87667e-06	0	IGF1_IGF1R	IGF1 - IGF1R	IGF	Secreted Signaling	PMID: 14604834	LS	0.220417	26.0504	13.6986	0.0295228	-0.361199	82.5767	82.9483	0.000184292
468	Interneuron_4	Interneuron_3	IGF1	IGF1R	1.85571e-06	0	IGF1_IGF1R	IGF1 - IGF1R	IGF	Secreted Signaling	PMID: 14604834	LS	0.220417	26.0504	13.6986	0.0295228	-0.389934	78.6335	79.9659	0.025127
469	Interneuron_4	Interneuron_M1	IGF1	IGF1R	1.19897e-06	0	IGF1_IGF1R	IGF1 - IGF1R	IGF	Secreted Signaling	PMID: 14604834	LS	0.220417	26.0504	13.6986	0.0295228	-0.5929	73.8318	82.8838	6.15635e-11
470	Interneuron_4	Mig_Layer_2-4_ExN	IGF1	IGF1R	2.28204e-06	0	IGF1_IGF1R	IGF1 - IGF1R	IGF	Secreted Signaling	PMID: 14604834	LS	0.220417	26.0504	13.6986	0.0295228	-0.315302	86.7925	87.3927	0.00277391
471	Interneuron_4	OPC_1	IGF1	IGF1R	9.69372e-07	0	IGF1_IGF1R	IGF1 - IGF1R	IGF	Secreted Signaling	PMID: 14604834	LS	0.220417	26.0504	13.6986	0.0295228	NA	NA	NA	NA
472	Interneuron_4	Layer_4-5_ExN	IGF1	IGF1R	2.96728e-06	0	IGF1_IGF1R	IGF1 - IGF1R	IGF	Secreted Signaling	PMID: 14604834	LS	0.220417	26.0504	13.6986	0.0295228	-1.29607	89.9918	92.668	1.23767e-06
473	Interneuron_4	Interneuron_S1	IGF1	IGF1R	1.02944e-06	0	IGF1_IGF1R	IGF1 - IGF1R	IGF	Secreted Signaling	PMID: 14604834	LS	0.220417	26.0504	13.6986	0.0295228	-0.689419	67.2811	78.5558	0.000129093
474	Interneuron_4	vRG	IGF1	IGF1R	8.79714e-07	0	IGF1_IGF1R	IGF1 - IGF1R	IGF	Secreted Signaling	PMID: 14604834	LS	0.220417	26.0504	13.6986	0.0295228	NA	NA	NA	NA
475	Interneuron_4	Cycling_progenitors	IGF1	IGF1R	9.62449e-07	0	IGF1_IGF1R	IGF1 - IGF1R	IGF	Secreted Signaling	PMID: 14604834	LS	0.220417	26.0504	13.6986	0.0295228	-0.237925	69.6179	71	0.0197672
476	Interneuron_4	Layer_2-4_ExN	IGF1	IGF1R	2.23473e-06	0	IGF1_IGF1R	IGF1 - IGF1R	IGF	Secreted Signaling	PMID: 14604834	LS	0.220417	26.0504	13.6986	0.0295228	-0.403585	88.3668	85.0757	0.00278952
477	Interneuron_4	Interneuron_4	IGF1	IGF1R	1.94415e-06	0	IGF1_IGF1R	IGF1 - IGF1R	IGF	Secreted Signaling	PMID: 14604834	LS	0.220417	26.0504	13.6986	0.0295228	NA	NA	NA	NA
478	Interneuron_4	Astrocyte_progenitors	IGF1	IGF1R	9.69357e-07	0	IGF1_IGF1R	IGF1 - IGF1R	IGF	Secreted Signaling	PMID: 14604834	LS	0.220417	26.0504	13.6986	0.0295228	-1.50488	64.881	85.3521	2.46342e-48
479	Interneuron_4	Smooth_muscle_2	IGF1	IGF1R	3.74024e-06	0	IGF1_IGF1R	IGF1 - IGF1R	IGF	Secreted Signaling	PMID: 14604834	LS	0.220417	26.0504	13.6986	0.0295228	-3.50917	89.5833	89.2405	0.0100455
480	Interneuron_4	Microglia_1	IGF1	IGF1R	2.07045e-07	0	IGF1_IGF1R	IGF1 - IGF1R	IGF	Secreted Signaling	PMID: 14604834	LS	0.220417	26.0504	13.6986	0.0295228	-0.488223	30.303	38.4236	0.0227177
481	Interneuron_4	Smooth_muscle_1	IGF1	IGF1R	9.12588e-07	0	IGF1_IGF1R	IGF1 - IGF1R	IGF	Secreted Signaling	PMID: 14604834	LS	0.220417	26.0504	13.6986	0.0295228	NA	NA	NA	NA
482	Interneuron_4	Interneuron_S2	IGF1	IGF1R	1.89674e-06	0	IGF1_IGF1R	IGF1 - IGF1R	IGF	Secreted Signaling	PMID: 14604834	LS	0.220417	26.0504	13.6986	0.0295228	NA	NA	NA	NA
483	Interneuron_4	OL	IGF1	IGF1R	3.766e-07	0	IGF1_IGF1R	IGF1 - IGF1R	IGF	Secreted Signaling	PMID: 14604834	LS	0.220417	26.0504	13.6986	0.0295228	NA	NA	NA	NA
484	Interneuron_M1	Layer_4-6_ExN	PTN	PTPRZ1	1.65943e-06	0	PTN_PTPRZ1	PTN - PTPRZ1	PTN	Secreted Signaling	PMID: 28356350; PMID: 25620911	LS	0.122279	37.1495	32.1577	3.24333e-05	-0.682583	87.0479	83.5722	9.86661e-06
485	Interneuron_S2	Layer_4-6_ExN	PTN	PTPRZ1	1.85609e-06	0	PTN_PTPRZ1	PTN - PTPRZ1	PTN	Secreted Signaling	PMID: 28356350; PMID: 25620911	LS	0.357061	41.0526	30.6667	4.62584e-08	-0.682583	87.0479	83.5722	9.86661e-06
486	Interneuron_M1	oRG	PTN	PTPRZ1	5.07057e-06	0	PTN_PTPRZ1	PTN - PTPRZ1	PTN	Secreted Signaling	PMID: 28356350; PMID: 25620911	LS	0.122279	37.1495	32.1577	3.24333e-05	NA	NA	NA	NA
487	Interneuron_S2	oRG	PTN	PTPRZ1	5.67146e-06	0	PTN_PTPRZ1	PTN - PTPRZ1	PTN	Secreted Signaling	PMID: 28356350; PMID: 25620911	LS	0.357061	41.0526	30.6667	4.62584e-08	NA	NA	NA	NA
488	Interneuron_M1	Layer_5-6_ExN	PTN	PTPRZ1	1.71462e-06	0	PTN_PTPRZ1	PTN - PTPRZ1	PTN	Secreted Signaling	PMID: 28356350; PMID: 25620911	LS	0.122279	37.1495	32.1577	3.24333e-05	-0.603811	86.8712	88.7789	5.32199e-10
489	Interneuron_S2	Layer_5-6_ExN	PTN	PTPRZ1	1.91782e-06	0	PTN_PTPRZ1	PTN - PTPRZ1	PTN	Secreted Signaling	PMID: 28356350; PMID: 25620911	LS	0.357061	41.0526	30.6667	4.62584e-08	-0.603811	86.8712	88.7789	5.32199e-10
490	Interneuron_M1	Mig_Layer_2-4_ExN	PTN	PTPRZ1	2.25188e-06	0	PTN_PTPRZ1	PTN - PTPRZ1	PTN	Secreted Signaling	PMID: 28356350; PMID: 25620911	LS	0.122279	37.1495	32.1577	3.24333e-05	-0.509433	90.2009	90.231	3.6217e-08
491	Interneuron_S2	Mig_Layer_2-4_ExN	PTN	PTPRZ1	2.51875e-06	0	PTN_PTPRZ1	PTN - PTPRZ1	PTN	Secreted Signaling	PMID: 28356350; PMID: 25620911	LS	0.357061	41.0526	30.6667	4.62584e-08	-0.509433	90.2009	90.231	3.6217e-08
492	Interneuron_M1	OPC_1	PTN	PTPRZ1	6.35907e-06	0	PTN_PTPRZ1	PTN - PTPRZ1	PTN	Secreted Signaling	PMID: 28356350; PMID: 25620911	LS	0.122279	37.1495	32.1577	3.24333e-05	-3.03465	99.0724	98.524	4.97845e-07
493	Interneuron_S2	OPC_1	PTN	PTPRZ1	7.11266e-06	0	PTN_PTPRZ1	PTN - PTPRZ1	PTN	Secreted Signaling	PMID: 28356350; PMID: 25620911	LS	0.357061	41.0526	30.6667	4.62584e-08	-3.03465	99.0724	98.524	4.97845e-07
494	Interneuron_M1	Layer_4-5_ExN	PTN	PTPRZ1	2.08063e-06	0	PTN_PTPRZ1	PTN - PTPRZ1	PTN	Secreted Signaling	PMID: 28356350; PMID: 25620911	LS	0.122279	37.1495	32.1577	3.24333e-05	-1.33067	87.9409	90.224	3.05441e-05
495	Interneuron_S2	Layer_4-5_ExN	PTN	PTPRZ1	2.32719e-06	0	PTN_PTPRZ1	PTN - PTPRZ1	PTN	Secreted Signaling	PMID: 28356350; PMID: 25620911	LS	0.357061	41.0526	30.6667	4.62584e-08	-1.33067	87.9409	90.224	3.05441e-05
496	Interneuron_M1	vRG	PTN	PTPRZ1	1.77113e-06	0	PTN_PTPRZ1	PTN - PTPRZ1	PTN	Secreted Signaling	PMID: 28356350; PMID: 25620911	LS	0.122279	37.1495	32.1577	3.24333e-05	-1.10562	86.5385	90.4564	1.75219e-05
497	Interneuron_S2	vRG	PTN	PTPRZ1	1.98102e-06	0	PTN_PTPRZ1	PTN - PTPRZ1	PTN	Secreted Signaling	PMID: 28356350; PMID: 25620911	LS	0.357061	41.0526	30.6667	4.62584e-08	-1.10562	86.5385	90.4564	1.75219e-05
498	Interneuron_M1	Cycling_progenitors	PTN	PTPRZ1	1.89187e-06	0	PTN_PTPRZ1	PTN - PTPRZ1	PTN	Secreted Signaling	PMID: 28356350; PMID: 25620911	LS	0.122279	37.1495	32.1577	3.24333e-05	0.967495	86.1137	70.0556	4.25222e-31
499	Interneuron_S2	Cycling_progenitors	PTN	PTPRZ1	2.11607e-06	0	PTN_PTPRZ1	PTN - PTPRZ1	PTN	Secreted Signaling	PMID: 28356350; PMID: 25620911	LS	0.357061	41.0526	30.6667	4.62584e-08	0.967495	86.1137	70.0556	4.25222e-31
500	Interneuron_M1	Layer_2-4_ExN	PTN	PTPRZ1	2.06398e-06	0	PTN_PTPRZ1	PTN - PTPRZ1	PTN	Secreted Signaling	PMID: 28356350; PMID: 25620911	LS	0.122279	37.1495	32.1577	3.24333e-05	NA	NA	NA	NA
501	Interneuron_S2	Layer_2-4_ExN	PTN	PTPRZ1	2.30858e-06	0	PTN_PTPRZ1	PTN - PTPRZ1	PTN	Secreted Signaling	PMID: 28356350; PMID: 25620911	LS	0.357061	41.0526	30.6667	4.62584e-08	NA	NA	NA	NA
502	Interneuron_M1	Astrocyte_progenitors	PTN	PTPRZ1	5.96033e-06	0	PTN_PTPRZ1	PTN - PTPRZ1	PTN	Secreted Signaling	PMID: 28356350; PMID: 25620911	LS	0.122279	37.1495	32.1577	3.24333e-05	3.78259	94.0476	86.1033	5.7735e-58
503	Interneuron_S2	Astrocyte_progenitors	PTN	PTPRZ1	6.66666e-06	0	PTN_PTPRZ1	PTN - PTPRZ1	PTN	Secreted Signaling	PMID: 28356350; PMID: 25620911	LS	0.357061	41.0526	30.6667	4.62584e-08	3.78259	94.0476	86.1033	5.7735e-58
504	Interneuron_M1	OL	PTN	PTPRZ1	2.25028e-06	0.01	PTN_PTPRZ1	PTN - PTPRZ1	PTN	Secreted Signaling	PMID: 28356350; PMID: 25620911	LS	0.122279	37.1495	32.1577	3.24333e-05	NA	NA	NA	NA
505	Interneuron_S2	OL	PTN	PTPRZ1	2.51695e-06	0	PTN_PTPRZ1	PTN - PTPRZ1	PTN	Secreted Signaling	PMID: 28356350; PMID: 25620911	LS	0.357061	41.0526	30.6667	4.62584e-08	NA	NA	NA	NA
506	Interneuron_M1	Smooth_muscle_2	PTN	SDC3	9.38669e-08	0	PTN_SDC3	PTN - SDC3	PTN	Secreted Signaling	PMID: 28356350; PMID: 25620911	LS	0.122279	37.1495	32.1577	3.24333e-05	-1.77289	28.4722	60.7595	1.0844e-11
507	Interneuron_S2	Smooth_muscle_2	PTN	SDC3	1.04991e-07	0	PTN_SDC3	PTN - SDC3	PTN	Secreted Signaling	PMID: 28356350; PMID: 25620911	LS	0.357061	41.0526	30.6667	4.62584e-08	-1.77289	28.4722	60.7595	1.0844e-11
508	Interneuron_M1	Interneuron_S2	PTN	SDC3	1.77826e-07	0	PTN_SDC3	PTN - SDC3	PTN	Secreted Signaling	PMID: 28356350; PMID: 25620911	LS	0.122279	37.1495	32.1577	3.24333e-05	0.264353	34.4737	14.1333	1.24423e-14
509	Interneuron_S2	Interneuron_S2	PTN	SDC3	1.98899e-07	0	PTN_SDC3	PTN - SDC3	PTN	Secreted Signaling	PMID: 28356350; PMID: 25620911	LS	0.357061	41.0526	30.6667	4.62584e-08	0.264353	34.4737	14.1333	1.24423e-14
510	Interneuron_M1	Smooth_muscle_2	PTN	NCL	2.12615e-07	0	PTN_NCL	PTN - NCL	PTN	Secreted Signaling	PMID: 28356350; PMID: 25620911	LS	0.122279	37.1495	32.1577	3.24333e-05	-1.8949	46.5278	70.2532	5.45157e-08
511	Interneuron_S2	Smooth_muscle_2	PTN	NCL	2.37811e-07	0	PTN_NCL	PTN - NCL	PTN	Secreted Signaling	PMID: 28356350; PMID: 25620911	LS	0.357061	41.0526	30.6667	4.62584e-08	-1.8949	46.5278	70.2532	5.45157e-08
512	Interneuron_M1	Smooth_muscle_1	PTN	NCL	1.51514e-07	0	PTN_NCL	PTN - NCL	PTN	Secreted Signaling	PMID: 28356350; PMID: 25620911	LS	0.122279	37.1495	32.1577	3.24333e-05	NA	NA	NA	NA
513	Interneuron_S2	Smooth_muscle_1	PTN	NCL	1.6947e-07	0	PTN_NCL	PTN - NCL	PTN	Secreted Signaling	PMID: 28356350; PMID: 25620911	LS	0.357061	41.0526	30.6667	4.62584e-08	NA	NA	NA	NA
514	Interneuron_M1	Interneuron_S1	PTN	ALK	4.03727e-07	0	PTN_ALK	PTN - ALK	PTN	Secreted Signaling	PMID: 28356350; PMID: 25620911	LS	0.122279	37.1495	32.1577	3.24333e-05	NA	NA	NA	NA
515	Interneuron_S2	Interneuron_S1	PTN	ALK	4.51571e-07	0	PTN_ALK	PTN - ALK	PTN	Secreted Signaling	PMID: 28356350; PMID: 25620911	LS	0.357061	41.0526	30.6667	4.62584e-08	NA	NA	NA	NA
516	Interneuron_M1	Interneuron_4	PTN	ALK	1.98644e-07	0	PTN_ALK	PTN - ALK	PTN	Secreted Signaling	PMID: 28356350; PMID: 25620911	LS	0.122279	37.1495	32.1577	3.24333e-05	0.380396	30.2521	15.0685	0.0217833
517	Interneuron_S2	Interneuron_4	PTN	ALK	2.22184e-07	0	PTN_ALK	PTN - ALK	PTN	Secreted Signaling	PMID: 28356350; PMID: 25620911	LS	0.357061	41.0526	30.6667	4.62584e-08	0.380396	30.2521	15.0685	0.0217833
518	Interneuron_M1	Interneuron_S2	PTN	ALK	4.03571e-07	0	PTN_ALK	PTN - ALK	PTN	Secreted Signaling	PMID: 28356350; PMID: 25620911	LS	0.122279	37.1495	32.1577	3.24333e-05	-0.0583848	47.7193	32.2667	1.53453e-05
519	Interneuron_S2	Interneuron_S2	PTN	ALK	4.51397e-07	0	PTN_ALK	PTN - ALK	PTN	Secreted Signaling	PMID: 28356350; PMID: 25620911	LS	0.357061	41.0526	30.6667	4.62584e-08	-0.0583848	47.7193	32.2667	1.53453e-05
520	Layer_4-6_ExN	Layer_4-5_ExN	SEMA3A	NRP1_PLXNA1	7.70412e-07	0	SEMA3A_NRP1_PLXNA1	SEMA3A - (NRP1+PLXNA1)	SEMA3	Secreted Signaling	PMID: 27533782	LS	0.264059	62.9521	52.9217	7.09809e-18	0.00423289	33.0599	33.4012	3.44838e-10
521	OPC_1	Layer_4-5_ExN	SEMA3A	NRP1_PLXNA1	1.99365e-07	0	SEMA3A_NRP1_PLXNA1	SEMA3A - (NRP1+PLXNA1)	SEMA3	Secreted Signaling	PMID: 27533782	LS	0.20236	33.3952	21.0332	7.37295e-06	0.00423289	33.0599	33.4012	3.44838e-10
522	Cycling_progenitors	Layer_4-5_ExN	SEMA3A	NRP1_PLXNA1	1.41221e-07	0	SEMA3A_NRP1_PLXNA1	SEMA3A - (NRP1+PLXNA1)	SEMA3	Secreted Signaling	PMID: 27533782	LS	0.110952	28.5182	18.3333	3.55111e-10	0.00423289	33.0599	33.4012	3.44838e-10
523	Layer_2-4_ExN	Layer_4-5_ExN	SEMA3A	NRP1_PLXNA1	6.64394e-07	0	SEMA3A_NRP1_PLXNA1	SEMA3A - (NRP1+PLXNA1)	SEMA3	Secreted Signaling	PMID: 27533782	LS	0.0857784	54.3823	45.6522	1.60243e-13	0.00423289	33.0599	33.4012	3.44838e-10
524	Interneuron_S2	Layer_4-5_ExN	SEMA3A	NRP1_PLXNA1	1.9407e-07	0	SEMA3A_NRP1_PLXNA1	SEMA3A - (NRP1+PLXNA1)	SEMA3	Secreted Signaling	PMID: 27533782	LS	0.321895	35.0877	18.9333	1.79451e-09	0.00423289	33.0599	33.4012	3.44838e-10
525	Layer_4-6_ExN	Interneuron_S2	SEMA3A	NRP1_PLXNA1	1.97681e-06	0	SEMA3A_NRP1_PLXNA1	SEMA3A - (NRP1+PLXNA1)	SEMA3	Secreted Signaling	PMID: 27533782	LS	0.264059	62.9521	52.9217	7.09809e-18	0.950842	44.5175	16.9333	4.47823e-08
526	OPC_1	Interneuron_S2	SEMA3A	NRP1_PLXNA1	5.11554e-07	0	SEMA3A_NRP1_PLXNA1	SEMA3A - (NRP1+PLXNA1)	SEMA3	Secreted Signaling	PMID: 27533782	LS	0.20236	33.3952	21.0332	7.37295e-06	0.950842	44.5175	16.9333	4.47823e-08
527	Cycling_progenitors	Interneuron_S2	SEMA3A	NRP1_PLXNA1	3.62362e-07	0	SEMA3A_NRP1_PLXNA1	SEMA3A - (NRP1+PLXNA1)	SEMA3	Secreted Signaling	PMID: 27533782	LS	0.110952	28.5182	18.3333	3.55111e-10	0.950842	44.5175	16.9333	4.47823e-08
528	Layer_2-4_ExN	Interneuron_S2	SEMA3A	NRP1_PLXNA1	1.70478e-06	0	SEMA3A_NRP1_PLXNA1	SEMA3A - (NRP1+PLXNA1)	SEMA3	Secreted Signaling	PMID: 27533782	LS	0.0857784	54.3823	45.6522	1.60243e-13	0.950842	44.5175	16.9333	4.47823e-08
529	Interneuron_S2	Interneuron_S2	SEMA3A	NRP1_PLXNA1	4.97967e-07	0	SEMA3A_NRP1_PLXNA1	SEMA3A - (NRP1+PLXNA1)	SEMA3	Secreted Signaling	PMID: 27533782	LS	0.321895	35.0877	18.9333	1.79451e-09	0.950842	44.5175	16.9333	4.47823e-08
530	Layer_4-6_ExN	Mig_Layer_2-3_ExN	SEMA3A	NRP1_PLXNA2	6.36774e-06	0	SEMA3A_NRP1_PLXNA2	SEMA3A - (NRP1+PLXNA2)	SEMA3	Secreted Signaling	PMID: 27533782	LS	0.264059	62.9521	52.9217	7.09809e-18	-0.0896429	77.1657	74.2242	7.44375e-30
531	OPC_1	Mig_Layer_2-3_ExN	SEMA3A	NRP1_PLXNA2	1.64783e-06	0	SEMA3A_NRP1_PLXNA2	SEMA3A - (NRP1+PLXNA2)	SEMA3	Secreted Signaling	PMID: 27533782	LS	0.20236	33.3952	21.0332	7.37295e-06	-0.0896429	77.1657	74.2242	7.44375e-30
532	Cycling_progenitors	Mig_Layer_2-3_ExN	SEMA3A	NRP1_PLXNA2	1.16725e-06	0	SEMA3A_NRP1_PLXNA2	SEMA3A - (NRP1+PLXNA2)	SEMA3	Secreted Signaling	PMID: 27533782	LS	0.110952	28.5182	18.3333	3.55111e-10	-0.0896429	77.1657	74.2242	7.44375e-30
533	Layer_2-4_ExN	Mig_Layer_2-3_ExN	SEMA3A	NRP1_PLXNA2	5.49147e-06	0	SEMA3A_NRP1_PLXNA2	SEMA3A - (NRP1+PLXNA2)	SEMA3	Secreted Signaling	PMID: 27533782	LS	0.0857784	54.3823	45.6522	1.60243e-13	-0.0896429	77.1657	74.2242	7.44375e-30
534	Interneuron_S2	Mig_Layer_2-3_ExN	SEMA3A	NRP1_PLXNA2	1.60406e-06	0	SEMA3A_NRP1_PLXNA2	SEMA3A - (NRP1+PLXNA2)	SEMA3	Secreted Signaling	PMID: 27533782	LS	0.321895	35.0877	18.9333	1.79451e-09	-0.0896429	77.1657	74.2242	7.44375e-30
535	Layer_4-6_ExN	Interneuron_M1	SEMA3A	NRP1_PLXNA2	2.59147e-06	0	SEMA3A_NRP1_PLXNA2	SEMA3A - (NRP1+PLXNA2)	SEMA3	Secreted Signaling	PMID: 27533782	LS	0.264059	62.9521	52.9217	7.09809e-18	-0.651375	58.6449	55.3942	2.0868e-10
536	OPC_1	Interneuron_M1	SEMA3A	NRP1_PLXNA2	6.70613e-07	0	SEMA3A_NRP1_PLXNA2	SEMA3A - (NRP1+PLXNA2)	SEMA3	Secreted Signaling	PMID: 27533782	LS	0.20236	33.3952	21.0332	7.37295e-06	-0.651375	58.6449	55.3942	2.0868e-10
537	Layer_2-4_ExN	Interneuron_M1	SEMA3A	NRP1_PLXNA2	2.23485e-06	0	SEMA3A_NRP1_PLXNA2	SEMA3A - (NRP1+PLXNA2)	SEMA3	Secreted Signaling	PMID: 27533782	LS	0.0857784	54.3823	45.6522	1.60243e-13	-0.651375	58.6449	55.3942	2.0868e-10
538	Interneuron_S2	Interneuron_M1	SEMA3A	NRP1_PLXNA2	6.52801e-07	0	SEMA3A_NRP1_PLXNA2	SEMA3A - (NRP1+PLXNA2)	SEMA3	Secreted Signaling	PMID: 27533782	LS	0.321895	35.0877	18.9333	1.79451e-09	-0.651375	58.6449	55.3942	2.0868e-10
539	Layer_4-6_ExN	Layer_4-5_ExN	SEMA3A	NRP1_PLXNA2	2.6359e-06	0	SEMA3A_NRP1_PLXNA2	SEMA3A - (NRP1+PLXNA2)	SEMA3	Secreted Signaling	PMID: 27533782	LS	0.264059	62.9521	52.9217	7.09809e-18	-0.608925	58.2445	49.8982	0.0180106
540	OPC_1	Layer_4-5_ExN	SEMA3A	NRP1_PLXNA2	6.82112e-07	0	SEMA3A_NRP1_PLXNA2	SEMA3A - (NRP1+PLXNA2)	SEMA3	Secreted Signaling	PMID: 27533782	LS	0.20236	33.3952	21.0332	7.37295e-06	-0.608925	58.2445	49.8982	0.0180106
541	Layer_2-4_ExN	Layer_4-5_ExN	SEMA3A	NRP1_PLXNA2	2.27317e-06	0	SEMA3A_NRP1_PLXNA2	SEMA3A - (NRP1+PLXNA2)	SEMA3	Secreted Signaling	PMID: 27533782	LS	0.0857784	54.3823	45.6522	1.60243e-13	-0.608925	58.2445	49.8982	0.0180106
542	Interneuron_S2	Layer_4-5_ExN	SEMA3A	NRP1_PLXNA2	6.63994e-07	0	SEMA3A_NRP1_PLXNA2	SEMA3A - (NRP1+PLXNA2)	SEMA3	Secreted Signaling	PMID: 27533782	LS	0.321895	35.0877	18.9333	1.79451e-09	-0.608925	58.2445	49.8982	0.0180106
543	Layer_4-6_ExN	Smooth_muscle_2	SEMA3A	NRP1_PLXNA2	5.3639e-06	0	SEMA3A_NRP1_PLXNA2	SEMA3A - (NRP1+PLXNA2)	SEMA3	Secreted Signaling	PMID: 27533782	LS	0.264059	62.9521	52.9217	7.09809e-18	-2.93875	69.7917	79.4304	1.87997e-05
544	OPC_1	Smooth_muscle_2	SEMA3A	NRP1_PLXNA2	1.38806e-06	0	SEMA3A_NRP1_PLXNA2	SEMA3A - (NRP1+PLXNA2)	SEMA3	Secreted Signaling	PMID: 27533782	LS	0.20236	33.3952	21.0332	7.37295e-06	-2.93875	69.7917	79.4304	1.87997e-05
545	Cycling_progenitors	Smooth_muscle_2	SEMA3A	NRP1_PLXNA2	9.83238e-07	0	SEMA3A_NRP1_PLXNA2	SEMA3A - (NRP1+PLXNA2)	SEMA3	Secreted Signaling	PMID: 27533782	LS	0.110952	28.5182	18.3333	3.55111e-10	-2.93875	69.7917	79.4304	1.87997e-05
546	Layer_2-4_ExN	Smooth_muscle_2	SEMA3A	NRP1_PLXNA2	4.62576e-06	0	SEMA3A_NRP1_PLXNA2	SEMA3A - (NRP1+PLXNA2)	SEMA3	Secreted Signaling	PMID: 27533782	LS	0.0857784	54.3823	45.6522	1.60243e-13	-2.93875	69.7917	79.4304	1.87997e-05
547	Interneuron_S2	Smooth_muscle_2	SEMA3A	NRP1_PLXNA2	1.35119e-06	0	SEMA3A_NRP1_PLXNA2	SEMA3A - (NRP1+PLXNA2)	SEMA3	Secreted Signaling	PMID: 27533782	LS	0.321895	35.0877	18.9333	1.79451e-09	-2.93875	69.7917	79.4304	1.87997e-05
548	Layer_4-6_ExN	Microglia_1	SEMA3A	NRP1_PLXNA2	6.57318e-07	0.01	SEMA3A_NRP1_PLXNA2	SEMA3A - (NRP1+PLXNA2)	SEMA3	Secreted Signaling	PMID: 27533782	LS	0.264059	62.9521	52.9217	7.09809e-18	NA	NA	NA	NA
549	Layer_2-4_ExN	Microglia_1	SEMA3A	NRP1_PLXNA2	5.66863e-07	0.02	SEMA3A_NRP1_PLXNA2	SEMA3A - (NRP1+PLXNA2)	SEMA3	Secreted Signaling	PMID: 27533782	LS	0.0857784	54.3823	45.6522	1.60243e-13	NA	NA	NA	NA
550	Layer_4-6_ExN	Interneuron_S2	SEMA3A	NRP1_PLXNA2	3.77479e-06	0	SEMA3A_NRP1_PLXNA2	SEMA3A - (NRP1+PLXNA2)	SEMA3	Secreted Signaling	PMID: 27533782	LS	0.264059	62.9521	52.9217	7.09809e-18	0.177251	53.8158	40.2667	1.28886e-09
551	OPC_1	Interneuron_S2	SEMA3A	NRP1_PLXNA2	9.76832e-07	0	SEMA3A_NRP1_PLXNA2	SEMA3A - (NRP1+PLXNA2)	SEMA3	Secreted Signaling	PMID: 27533782	LS	0.20236	33.3952	21.0332	7.37295e-06	0.177251	53.8158	40.2667	1.28886e-09
552	Cycling_progenitors	Interneuron_S2	SEMA3A	NRP1_PLXNA2	6.91944e-07	0	SEMA3A_NRP1_PLXNA2	SEMA3A - (NRP1+PLXNA2)	SEMA3	Secreted Signaling	PMID: 27533782	LS	0.110952	28.5182	18.3333	3.55111e-10	0.177251	53.8158	40.2667	1.28886e-09
553	Layer_2-4_ExN	Interneuron_S2	SEMA3A	NRP1_PLXNA2	3.25534e-06	0	SEMA3A_NRP1_PLXNA2	SEMA3A - (NRP1+PLXNA2)	SEMA3	Secreted Signaling	PMID: 27533782	LS	0.0857784	54.3823	45.6522	1.60243e-13	0.177251	53.8158	40.2667	1.28886e-09
554	Interneuron_S2	Interneuron_S2	SEMA3A	NRP1_PLXNA2	9.50886e-07	0	SEMA3A_NRP1_PLXNA2	SEMA3A - (NRP1+PLXNA2)	SEMA3	Secreted Signaling	PMID: 27533782	LS	0.321895	35.0877	18.9333	1.79451e-09	0.177251	53.8158	40.2667	1.28886e-09
555	Layer_4-6_ExN	Layer_4-5_ExN	SEMA3A	NRP1_PLXNA3	6.5944e-07	0	SEMA3A_NRP1_PLXNA3	SEMA3A - (NRP1+PLXNA3)	SEMA3	Secreted Signaling	PMID: 27533782	LS	0.264059	62.9521	52.9217	7.09809e-18	0.256115	37.5718	23.0143	3.56311e-10
556	OPC_1	Layer_4-5_ExN	SEMA3A	NRP1_PLXNA3	1.70648e-07	0	SEMA3A_NRP1_PLXNA3	SEMA3A - (NRP1+PLXNA3)	SEMA3	Secreted Signaling	PMID: 27533782	LS	0.20236	33.3952	21.0332	7.37295e-06	0.256115	37.5718	23.0143	3.56311e-10
557	Cycling_progenitors	Layer_4-5_ExN	SEMA3A	NRP1_PLXNA3	1.20879e-07	0	SEMA3A_NRP1_PLXNA3	SEMA3A - (NRP1+PLXNA3)	SEMA3	Secreted Signaling	PMID: 27533782	LS	0.110952	28.5182	18.3333	3.55111e-10	0.256115	37.5718	23.0143	3.56311e-10
558	Layer_2-4_ExN	Layer_4-5_ExN	SEMA3A	NRP1_PLXNA3	5.68693e-07	0	SEMA3A_NRP1_PLXNA3	SEMA3A - (NRP1+PLXNA3)	SEMA3	Secreted Signaling	PMID: 27533782	LS	0.0857784	54.3823	45.6522	1.60243e-13	0.256115	37.5718	23.0143	3.56311e-10
559	Interneuron_S2	Layer_4-5_ExN	SEMA3A	NRP1_PLXNA3	1.66115e-07	0	SEMA3A_NRP1_PLXNA3	SEMA3A - (NRP1+PLXNA3)	SEMA3	Secreted Signaling	PMID: 27533782	LS	0.321895	35.0877	18.9333	1.79451e-09	0.256115	37.5718	23.0143	3.56311e-10
560	Layer_4-6_ExN	Interneuron_S2	SEMA3A	NRP1_PLXNA3	1.79668e-06	0	SEMA3A_NRP1_PLXNA3	SEMA3A - (NRP1+PLXNA3)	SEMA3	Secreted Signaling	PMID: 27533782	LS	0.264059	62.9521	52.9217	7.09809e-18	0.944005	42.1491	13.2	1.04946e-10
561	OPC_1	Interneuron_S2	SEMA3A	NRP1_PLXNA3	4.64939e-07	0	SEMA3A_NRP1_PLXNA3	SEMA3A - (NRP1+PLXNA3)	SEMA3	Secreted Signaling	PMID: 27533782	LS	0.20236	33.3952	21.0332	7.37295e-06	0.944005	42.1491	13.2	1.04946e-10
562	Cycling_progenitors	Interneuron_S2	SEMA3A	NRP1_PLXNA3	3.29342e-07	0	SEMA3A_NRP1_PLXNA3	SEMA3A - (NRP1+PLXNA3)	SEMA3	Secreted Signaling	PMID: 27533782	LS	0.110952	28.5182	18.3333	3.55111e-10	0.944005	42.1491	13.2	1.04946e-10
563	Layer_2-4_ExN	Interneuron_S2	SEMA3A	NRP1_PLXNA3	1.54943e-06	0	SEMA3A_NRP1_PLXNA3	SEMA3A - (NRP1+PLXNA3)	SEMA3	Secreted Signaling	PMID: 27533782	LS	0.0857784	54.3823	45.6522	1.60243e-13	0.944005	42.1491	13.2	1.04946e-10
564	Interneuron_S2	Interneuron_S2	SEMA3A	NRP1_PLXNA3	4.5259e-07	0	SEMA3A_NRP1_PLXNA3	SEMA3A - (NRP1+PLXNA3)	SEMA3	Secreted Signaling	PMID: 27533782	LS	0.321895	35.0877	18.9333	1.79451e-09	0.944005	42.1491	13.2	1.04946e-10
565	Layer_4-6_ExN	Mig_Layer_2-3_ExN	SEMA3A	NRP1_PLXNA4	4.79382e-06	0	SEMA3A_NRP1_PLXNA4	SEMA3A - (NRP1+PLXNA4)	SEMA3	Secreted Signaling	PMID: 27533782	LS	0.264059	62.9521	52.9217	7.09809e-18	-0.109421	71.2218	67.7226	1.16326e-21
566	OPC_1	Mig_Layer_2-3_ExN	SEMA3A	NRP1_PLXNA4	1.24054e-06	0	SEMA3A_NRP1_PLXNA4	SEMA3A - (NRP1+PLXNA4)	SEMA3	Secreted Signaling	PMID: 27533782	LS	0.20236	33.3952	21.0332	7.37295e-06	-0.109421	71.2218	67.7226	1.16326e-21
567	Cycling_progenitors	Mig_Layer_2-3_ExN	SEMA3A	NRP1_PLXNA4	8.78739e-07	0	SEMA3A_NRP1_PLXNA4	SEMA3A - (NRP1+PLXNA4)	SEMA3	Secreted Signaling	PMID: 27533782	LS	0.110952	28.5182	18.3333	3.55111e-10	-0.109421	71.2218	67.7226	1.16326e-21
568	Layer_2-4_ExN	Mig_Layer_2-3_ExN	SEMA3A	NRP1_PLXNA4	4.13414e-06	0	SEMA3A_NRP1_PLXNA4	SEMA3A - (NRP1+PLXNA4)	SEMA3	Secreted Signaling	PMID: 27533782	LS	0.0857784	54.3823	45.6522	1.60243e-13	-0.109421	71.2218	67.7226	1.16326e-21
569	Interneuron_S2	Mig_Layer_2-3_ExN	SEMA3A	NRP1_PLXNA4	1.20759e-06	0	SEMA3A_NRP1_PLXNA4	SEMA3A - (NRP1+PLXNA4)	SEMA3	Secreted Signaling	PMID: 27533782	LS	0.321895	35.0877	18.9333	1.79451e-09	-0.109421	71.2218	67.7226	1.16326e-21
570	Layer_4-6_ExN	Interneuron_M1	SEMA3A	NRP1_PLXNA4	9.97331e-07	0	SEMA3A_NRP1_PLXNA4	SEMA3A - (NRP1+PLXNA4)	SEMA3	Secreted Signaling	PMID: 27533782	LS	0.264059	62.9521	52.9217	7.09809e-18	0.194063	40.6542	26.7635	2.0868e-10
571	Layer_2-4_ExN	Interneuron_M1	SEMA3A	NRP1_PLXNA4	8.60087e-07	0	SEMA3A_NRP1_PLXNA4	SEMA3A - (NRP1+PLXNA4)	SEMA3	Secreted Signaling	PMID: 27533782	LS	0.0857784	54.3823	45.6522	1.60243e-13	0.194063	40.6542	26.7635	2.0868e-10
572	Layer_4-6_ExN	Layer_4-5_ExN	SEMA3A	NRP1_PLXNA4	7.63485e-07	0	SEMA3A_NRP1_PLXNA4	SEMA3A - (NRP1+PLXNA4)	SEMA3	Secreted Signaling	PMID: 27533782	LS	0.264059	62.9521	52.9217	7.09809e-18	0.0298593	36.9975	24.1344	2.34912e-05
573	Layer_2-4_ExN	Layer_4-5_ExN	SEMA3A	NRP1_PLXNA4	6.5842e-07	0	SEMA3A_NRP1_PLXNA4	SEMA3A - (NRP1+PLXNA4)	SEMA3	Secreted Signaling	PMID: 27533782	LS	0.0857784	54.3823	45.6522	1.60243e-13	0.0298593	36.9975	24.1344	2.34912e-05
574	Layer_4-6_ExN	Layer_2-4_ExN	SEMA3A	NRP1_PLXNA4	3.43309e-06	0	SEMA3A_NRP1_PLXNA4	SEMA3A - (NRP1+PLXNA4)	SEMA3	Secreted Signaling	PMID: 27533782	LS	0.264059	62.9521	52.9217	7.09809e-18	-0.0369359	62.6804	60.0635	2.89464e-06
575	OPC_1	Layer_2-4_ExN	SEMA3A	NRP1_PLXNA4	8.88408e-07	0	SEMA3A_NRP1_PLXNA4	SEMA3A - (NRP1+PLXNA4)	SEMA3	Secreted Signaling	PMID: 27533782	LS	0.20236	33.3952	21.0332	7.37295e-06	-0.0369359	62.6804	60.0635	2.89464e-06
576	Cycling_progenitors	Layer_2-4_ExN	SEMA3A	NRP1_PLXNA4	6.29308e-07	0	SEMA3A_NRP1_PLXNA4	SEMA3A - (NRP1+PLXNA4)	SEMA3	Secreted Signaling	PMID: 27533782	LS	0.110952	28.5182	18.3333	3.55111e-10	-0.0369359	62.6804	60.0635	2.89464e-06
577	Layer_2-4_ExN	Layer_2-4_ExN	SEMA3A	NRP1_PLXNA4	2.96066e-06	0	SEMA3A_NRP1_PLXNA4	SEMA3A - (NRP1+PLXNA4)	SEMA3	Secreted Signaling	PMID: 27533782	LS	0.0857784	54.3823	45.6522	1.60243e-13	-0.0369359	62.6804	60.0635	2.89464e-06
578	Interneuron_S2	Layer_2-4_ExN	SEMA3A	NRP1_PLXNA4	8.64811e-07	0	SEMA3A_NRP1_PLXNA4	SEMA3A - (NRP1+PLXNA4)	SEMA3	Secreted Signaling	PMID: 27533782	LS	0.321895	35.0877	18.9333	1.79451e-09	-0.0369359	62.6804	60.0635	2.89464e-06
579	Layer_4-6_ExN	Interneuron_S2	SEMA3A	NRP1_PLXNA4	7.48199e-06	0	SEMA3A_NRP1_PLXNA4	SEMA3A - (NRP1+PLXNA4)	SEMA3	Secreted Signaling	PMID: 27533782	LS	0.264059	62.9521	52.9217	7.09809e-18	2.38473	68.9474	29.4667	4.7002e-48
580	OPC_1	Interneuron_S2	SEMA3A	NRP1_PLXNA4	1.93618e-06	0	SEMA3A_NRP1_PLXNA4	SEMA3A - (NRP1+PLXNA4)	SEMA3	Secreted Signaling	PMID: 27533782	LS	0.20236	33.3952	21.0332	7.37295e-06	2.38473	68.9474	29.4667	4.7002e-48
581	Cycling_progenitors	Interneuron_S2	SEMA3A	NRP1_PLXNA4	1.3715e-06	0	SEMA3A_NRP1_PLXNA4	SEMA3A - (NRP1+PLXNA4)	SEMA3	Secreted Signaling	PMID: 27533782	LS	0.110952	28.5182	18.3333	3.55111e-10	2.38473	68.9474	29.4667	4.7002e-48
582	Layer_2-4_ExN	Interneuron_S2	SEMA3A	NRP1_PLXNA4	6.45239e-06	0	SEMA3A_NRP1_PLXNA4	SEMA3A - (NRP1+PLXNA4)	SEMA3	Secreted Signaling	PMID: 27533782	LS	0.0857784	54.3823	45.6522	1.60243e-13	2.38473	68.9474	29.4667	4.7002e-48
583	Interneuron_S2	Interneuron_S2	SEMA3A	NRP1_PLXNA4	1.88475e-06	0	SEMA3A_NRP1_PLXNA4	SEMA3A - (NRP1+PLXNA4)	SEMA3	Secreted Signaling	PMID: 27533782	LS	0.321895	35.0877	18.9333	1.79451e-09	2.38473	68.9474	29.4667	4.7002e-48
584	Mig_Layer_2-3_ExN	Layer_4-5_ExN	SEMA3C	NRP1_PLXNA1	1.03482e-06	0	SEMA3C_NRP1_PLXNA1	SEMA3C - (NRP1+PLXNA1)	SEMA3	Secreted Signaling	PMID: 27533782	LS	0.104778	71.1325	66.7568	1.48232e-08	0.00423289	33.0599	33.4012	3.44838e-10
585	Layer_2-4_ExN	Layer_4-5_ExN	SEMA3C	NRP1_PLXNA1	7.1774e-07	0	SEMA3C_NRP1_PLXNA1	SEMA3C - (NRP1+PLXNA1)	SEMA3	Secreted Signaling	PMID: 27533782	LS	0.401827	60.8765	40.2785	1.38164e-84	0.00423289	33.0599	33.4012	3.44838e-10
586	Mig_Layer_2-3_ExN	Interneuron_S2	SEMA3C	NRP1_PLXNA1	2.65527e-06	0	SEMA3C_NRP1_PLXNA1	SEMA3C - (NRP1+PLXNA1)	SEMA3	Secreted Signaling	PMID: 27533782	LS	0.104778	71.1325	66.7568	1.48232e-08	0.950842	44.5175	16.9333	4.47823e-08
587	Layer_2-4_ExN	Interneuron_S2	SEMA3C	NRP1_PLXNA1	1.84166e-06	0	SEMA3C_NRP1_PLXNA1	SEMA3C - (NRP1+PLXNA1)	SEMA3	Secreted Signaling	PMID: 27533782	LS	0.401827	60.8765	40.2785	1.38164e-84	0.950842	44.5175	16.9333	4.47823e-08
588	Mig_Layer_2-3_ExN	Mig_Layer_2-3_ExN	SEMA3C	NRP1_PLXNA2	8.55318e-06	0	SEMA3C_NRP1_PLXNA2	SEMA3C - (NRP1+PLXNA2)	SEMA3	Secreted Signaling	PMID: 27533782	LS	0.104778	71.1325	66.7568	1.48232e-08	-0.0896429	77.1657	74.2242	7.44375e-30
589	Layer_2-4_ExN	Mig_Layer_2-3_ExN	SEMA3C	NRP1_PLXNA2	5.93239e-06	0	SEMA3C_NRP1_PLXNA2	SEMA3C - (NRP1+PLXNA2)	SEMA3	Secreted Signaling	PMID: 27533782	LS	0.401827	60.8765	40.2785	1.38164e-84	-0.0896429	77.1657	74.2242	7.44375e-30
590	Mig_Layer_2-3_ExN	Interneuron_M1	SEMA3C	NRP1_PLXNA2	3.48087e-06	0	SEMA3C_NRP1_PLXNA2	SEMA3C - (NRP1+PLXNA2)	SEMA3	Secreted Signaling	PMID: 27533782	LS	0.104778	71.1325	66.7568	1.48232e-08	-0.651375	58.6449	55.3942	2.0868e-10
591	Layer_2-4_ExN	Interneuron_M1	SEMA3C	NRP1_PLXNA2	2.41429e-06	0	SEMA3C_NRP1_PLXNA2	SEMA3C - (NRP1+PLXNA2)	SEMA3	Secreted Signaling	PMID: 27533782	LS	0.401827	60.8765	40.2785	1.38164e-84	-0.651375	58.6449	55.3942	2.0868e-10
592	Mig_Layer_2-3_ExN	Layer_4-5_ExN	SEMA3C	NRP1_PLXNA2	3.54056e-06	0	SEMA3C_NRP1_PLXNA2	SEMA3C - (NRP1+PLXNA2)	SEMA3	Secreted Signaling	PMID: 27533782	LS	0.104778	71.1325	66.7568	1.48232e-08	-0.608925	58.2445	49.8982	0.0180106
593	Layer_2-4_ExN	Layer_4-5_ExN	SEMA3C	NRP1_PLXNA2	2.45569e-06	0	SEMA3C_NRP1_PLXNA2	SEMA3C - (NRP1+PLXNA2)	SEMA3	Secreted Signaling	PMID: 27533782	LS	0.401827	60.8765	40.2785	1.38164e-84	-0.608925	58.2445	49.8982	0.0180106
594	Mig_Layer_2-3_ExN	Smooth_muscle_2	SEMA3C	NRP1_PLXNA2	7.20481e-06	0	SEMA3C_NRP1_PLXNA2	SEMA3C - (NRP1+PLXNA2)	SEMA3	Secreted Signaling	PMID: 27533782	LS	0.104778	71.1325	66.7568	1.48232e-08	-2.93875	69.7917	79.4304	1.87997e-05
595	Layer_2-4_ExN	Smooth_muscle_2	SEMA3C	NRP1_PLXNA2	4.99717e-06	0	SEMA3C_NRP1_PLXNA2	SEMA3C - (NRP1+PLXNA2)	SEMA3	Secreted Signaling	PMID: 27533782	LS	0.401827	60.8765	40.2785	1.38164e-84	-2.93875	69.7917	79.4304	1.87997e-05
596	Mig_Layer_2-3_ExN	Interneuron_S2	SEMA3C	NRP1_PLXNA2	5.07032e-06	0	SEMA3C_NRP1_PLXNA2	SEMA3C - (NRP1+PLXNA2)	SEMA3	Secreted Signaling	PMID: 27533782	LS	0.104778	71.1325	66.7568	1.48232e-08	0.177251	53.8158	40.2667	1.28886e-09
597	Layer_2-4_ExN	Interneuron_S2	SEMA3C	NRP1_PLXNA2	3.51671e-06	0	SEMA3C_NRP1_PLXNA2	SEMA3C - (NRP1+PLXNA2)	SEMA3	Secreted Signaling	PMID: 27533782	LS	0.401827	60.8765	40.2785	1.38164e-84	0.177251	53.8158	40.2667	1.28886e-09
598	Mig_Layer_2-3_ExN	Layer_4-5_ExN	SEMA3C	NRP1_PLXNA3	8.85764e-07	0	SEMA3C_NRP1_PLXNA3	SEMA3C - (NRP1+PLXNA3)	SEMA3	Secreted Signaling	PMID: 27533782	LS	0.104778	71.1325	66.7568	1.48232e-08	0.256115	37.5718	23.0143	3.56311e-10
599	Layer_2-4_ExN	Layer_4-5_ExN	SEMA3C	NRP1_PLXNA3	6.14355e-07	0	SEMA3C_NRP1_PLXNA3	SEMA3C - (NRP1+PLXNA3)	SEMA3	Secreted Signaling	PMID: 27533782	LS	0.401827	60.8765	40.2785	1.38164e-84	0.256115	37.5718	23.0143	3.56311e-10
600	Mig_Layer_2-3_ExN	Interneuron_S2	SEMA3C	NRP1_PLXNA3	2.41331e-06	0	SEMA3C_NRP1_PLXNA3	SEMA3C - (NRP1+PLXNA3)	SEMA3	Secreted Signaling	PMID: 27533782	LS	0.104778	71.1325	66.7568	1.48232e-08	0.944005	42.1491	13.2	1.04946e-10
601	Layer_2-4_ExN	Interneuron_S2	SEMA3C	NRP1_PLXNA3	1.67384e-06	0	SEMA3C_NRP1_PLXNA3	SEMA3C - (NRP1+PLXNA3)	SEMA3	Secreted Signaling	PMID: 27533782	LS	0.401827	60.8765	40.2785	1.38164e-84	0.944005	42.1491	13.2	1.04946e-10
602	Mig_Layer_2-3_ExN	Mig_Layer_2-3_ExN	SEMA3C	NRP1_PLXNA4	6.43909e-06	0	SEMA3C_NRP1_PLXNA4	SEMA3C - (NRP1+PLXNA4)	SEMA3	Secreted Signaling	PMID: 27533782	LS	0.104778	71.1325	66.7568	1.48232e-08	-0.109421	71.2218	67.7226	1.16326e-21
603	Layer_2-4_ExN	Mig_Layer_2-3_ExN	SEMA3C	NRP1_PLXNA4	4.46608e-06	0	SEMA3C_NRP1_PLXNA4	SEMA3C - (NRP1+PLXNA4)	SEMA3	Secreted Signaling	PMID: 27533782	LS	0.401827	60.8765	40.2785	1.38164e-84	-0.109421	71.2218	67.7226	1.16326e-21
604	Mig_Layer_2-3_ExN	Interneuron_M1	SEMA3C	NRP1_PLXNA4	1.33962e-06	0	SEMA3C_NRP1_PLXNA4	SEMA3C - (NRP1+PLXNA4)	SEMA3	Secreted Signaling	PMID: 27533782	LS	0.104778	71.1325	66.7568	1.48232e-08	0.194063	40.6542	26.7635	2.0868e-10
605	Mig_Layer_2-3_ExN	Layer_2-4_ExN	SEMA3C	NRP1_PLXNA4	4.61135e-06	0	SEMA3C_NRP1_PLXNA4	SEMA3C - (NRP1+PLXNA4)	SEMA3	Secreted Signaling	PMID: 27533782	LS	0.104778	71.1325	66.7568	1.48232e-08	-0.0369359	62.6804	60.0635	2.89464e-06
606	Layer_2-4_ExN	Layer_2-4_ExN	SEMA3C	NRP1_PLXNA4	3.19838e-06	0	SEMA3C_NRP1_PLXNA4	SEMA3C - (NRP1+PLXNA4)	SEMA3	Secreted Signaling	PMID: 27533782	LS	0.401827	60.8765	40.2785	1.38164e-84	-0.0369359	62.6804	60.0635	2.89464e-06
607	Mig_Layer_2-3_ExN	Interneuron_S2	SEMA3C	NRP1_PLXNA4	1.00498e-05	0	SEMA3C_NRP1_PLXNA4	SEMA3C - (NRP1+PLXNA4)	SEMA3	Secreted Signaling	PMID: 27533782	LS	0.104778	71.1325	66.7568	1.48232e-08	2.38473	68.9474	29.4667	4.7002e-48
608	Layer_2-4_ExN	Interneuron_S2	SEMA3C	NRP1_PLXNA4	6.97046e-06	0	SEMA3C_NRP1_PLXNA4	SEMA3C - (NRP1+PLXNA4)	SEMA3	Secreted Signaling	PMID: 27533782	LS	0.401827	60.8765	40.2785	1.38164e-84	2.38473	68.9474	29.4667	4.7002e-48
609	Mig_Layer_2-3_ExN	Interneuron_S2	SEMA3C	NRP2_PLXNA1	1.22726e-06	0	SEMA3C_NRP2_PLXNA1	SEMA3C - (NRP2+PLXNA1)	SEMA3	Secreted Signaling	PMID: 27533782	LS	0.104778	71.1325	66.7568	1.48232e-08	0.518476	39.7807	14.6667	4.47823e-08
610	Layer_2-4_ExN	Interneuron_S2	SEMA3C	NRP2_PLXNA1	8.51213e-07	0	SEMA3C_NRP2_PLXNA1	SEMA3C - (NRP2+PLXNA1)	SEMA3	Secreted Signaling	PMID: 27533782	LS	0.401827	60.8765	40.2785	1.38164e-84	0.518476	39.7807	14.6667	4.47823e-08
611	Mig_Layer_2-3_ExN	Smooth_muscle_2	SEMA3C	NRP2_PLXNA2	2.1276e-06	0	SEMA3C_NRP2_PLXNA2	SEMA3C - (NRP2+PLXNA2)	SEMA3	Secreted Signaling	PMID: 27533782	LS	0.104778	71.1325	66.7568	1.48232e-08	-1.71844	46.875	66.7722	1.6358e-05
612	Layer_2-4_ExN	Smooth_muscle_2	SEMA3C	NRP2_PLXNA2	1.47568e-06	0	SEMA3C_NRP2_PLXNA2	SEMA3C - (NRP2+PLXNA2)	SEMA3	Secreted Signaling	PMID: 27533782	LS	0.401827	60.8765	40.2785	1.38164e-84	-1.71844	46.875	66.7722	1.6358e-05
613	Mig_Layer_2-3_ExN	Interneuron_S2	SEMA3C	NRP2_PLXNA2	2.3435e-06	0	SEMA3C_NRP2_PLXNA2	SEMA3C - (NRP2+PLXNA2)	SEMA3	Secreted Signaling	PMID: 27533782	LS	0.104778	71.1325	66.7568	1.48232e-08	-0.255115	49.0789	38	1.28886e-09
614	Layer_2-4_ExN	Interneuron_S2	SEMA3C	NRP2_PLXNA2	1.62542e-06	0	SEMA3C_NRP2_PLXNA2	SEMA3C - (NRP2+PLXNA2)	SEMA3	Secreted Signaling	PMID: 27533782	LS	0.401827	60.8765	40.2785	1.38164e-84	-0.255115	49.0789	38	1.28886e-09
615	Mig_Layer_2-3_ExN	Interneuron_S2	SEMA3C	NRP2_PLXNA3	1.11543e-06	0	SEMA3C_NRP2_PLXNA3	SEMA3C - (NRP2+PLXNA3)	SEMA3	Secreted Signaling	PMID: 27533782	LS	0.104778	71.1325	66.7568	1.48232e-08	0.51164	37.4123	10.9333	1.04946e-10
616	Layer_2-4_ExN	Interneuron_S2	SEMA3C	NRP2_PLXNA3	7.73646e-07	0	SEMA3C_NRP2_PLXNA3	SEMA3C - (NRP2+PLXNA3)	SEMA3	Secreted Signaling	PMID: 27533782	LS	0.401827	60.8765	40.2785	1.38164e-84	0.51164	37.4123	10.9333	1.04946e-10
617	Mig_Layer_2-3_ExN	Interneuron_S2	SEMA3C	NRP2_PLXNA4	4.64504e-06	0	SEMA3C_NRP2_PLXNA4	SEMA3C - (NRP2+PLXNA4)	SEMA3	Secreted Signaling	PMID: 27533782	LS	0.104778	71.1325	66.7568	1.48232e-08	1.95236	64.2105	27.2	6.75017e-38
618	Layer_2-4_ExN	Interneuron_S2	SEMA3C	NRP2_PLXNA4	3.22175e-06	0	SEMA3C_NRP2_PLXNA4	SEMA3C - (NRP2+PLXNA4)	SEMA3	Secreted Signaling	PMID: 27533782	LS	0.401827	60.8765	40.2785	1.38164e-84	1.95236	64.2105	27.2	6.75017e-38
619	Mig_Layer_2-3_ExN	Smooth_muscle_2	SEMA3C	NRP1_NRP2	4.52034e-06	0	SEMA3C_NRP1_NRP2	SEMA3C - (NRP1+NRP2)	SEMA3	Secreted Signaling	PMID: 27533782	LS	0.104778	71.1325	66.7568	1.48232e-08	-2.50245	56.4815	77.0042	1.63343e-06
620	Layer_2-4_ExN	Smooth_muscle_2	SEMA3C	NRP1_NRP2	3.13525e-06	0	SEMA3C_NRP1_NRP2	SEMA3C - (NRP1+NRP2)	SEMA3	Secreted Signaling	PMID: 27533782	LS	0.401827	60.8765	40.2785	1.38164e-84	-2.50245	56.4815	77.0042	1.63343e-06
621	Mig_Layer_2-3_ExN	Smooth_muscle_2	SEMA3C	PLXND1	4.93243e-06	0	SEMA3C_PLXND1	SEMA3C - PLXND1	SEMA3	Secreted Signaling	PMID: 27533782	LS	0.104778	71.1325	66.7568	1.48232e-08	-2.30719	52.7778	77.8481	3.2079e-11
622	Layer_2-4_ExN	Smooth_muscle_2	SEMA3C	PLXND1	3.42107e-06	0	SEMA3C_PLXND1	SEMA3C - PLXND1	SEMA3	Secreted Signaling	PMID: 27533782	LS	0.401827	60.8765	40.2785	1.38164e-84	-2.30719	52.7778	77.8481	3.2079e-11
623	Layer_4-6_ExN	Smooth_muscle_2	SEMA3E	PLXND1	5.10076e-06	0	SEMA3E_PLXND1	SEMA3E - PLXND1	SEMA3	Secreted Signaling	PMID: 22325954	LS	0.850599	70.1596	49.3936	8.10906e-58	-2.30719	52.7778	77.8481	3.2079e-11
624	Layer_4-5_ExN	Smooth_muscle_2	SEMA3E	PLXND1	8.99439e-06	0	SEMA3E_PLXND1	SEMA3E - PLXND1	SEMA3	Secreted Signaling	PMID: 22325954	LS	1.19833	73.831	53.7678	4.84456e-18	-2.30719	52.7778	77.8481	3.2079e-11
625	Interneuron_M2	Layer_4-6_ExN	PTPRS	NTRK3	2.01189e-05	0	PTPRS_NTRK3	PTPRS - NTRK3	PTPR	Secreted Signaling	PMID:21262467;PMID:25385546;	LS	0.603037	74.2361	63.2603	1.48355e-16	-0.998276	94.5213	91.9515	2.2781e-10
626	IP_IN	Layer_4-6_ExN	PTPRS	NTRK3	1.21532e-05	0	PTPRS_NTRK3	PTPRS - NTRK3	PTPR	Secreted Signaling	PMID:21262467;PMID:25385546;	LS	0.136544	52.439	48.6486	0.000978137	-0.998276	94.5213	91.9515	2.2781e-10
627	Interneuron_M1	Layer_4-6_ExN	PTPRS	NTRK3	1.77918e-05	0	PTPRS_NTRK3	PTPRS - NTRK3	PTPR	Secreted Signaling	PMID:21262467;PMID:25385546;	LS	0.433456	71.9626	61.5145	9.12239e-13	-0.998276	94.5213	91.9515	2.2781e-10
628	Interneuron_S2	Layer_4-6_ExN	PTPRS	NTRK3	5.7108e-05	0	PTPRS_NTRK3	PTPRS - NTRK3	PTPR	Secreted Signaling	PMID:21262467;PMID:25385546;	LS	1.69953	92.807	82.6667	1.01223e-24	-0.998276	94.5213	91.9515	2.2781e-10
629	Interneuron_S2	oRG	PTPRS	NTRK3	1.11212e-05	0	PTPRS_NTRK3	PTPRS - NTRK3	PTPR	Secreted Signaling	PMID:21262467;PMID:25385546;	LS	1.69953	92.807	82.6667	1.01223e-24	0.228964	58.9552	44.1491	2.84147e-49
630	Interneuron_M2	Layer_5-6_ExN	PTPRS	NTRK3	1.77984e-05	0	PTPRS_NTRK3	PTPRS - NTRK3	PTPR	Secreted Signaling	PMID:21262467;PMID:25385546;	LS	0.603037	74.2361	63.2603	1.48355e-16	-1.59884	92.6994	92.3726	2.6378e-27
631	IP_IN	Layer_5-6_ExN	PTPRS	NTRK3	1.07514e-05	0	PTPRS_NTRK3	PTPRS - NTRK3	PTPR	Secreted Signaling	PMID:21262467;PMID:25385546;	LS	0.136544	52.439	48.6486	0.000978137	-1.59884	92.6994	92.3726	2.6378e-27
632	Interneuron_M1	Layer_5-6_ExN	PTPRS	NTRK3	1.57397e-05	0	PTPRS_NTRK3	PTPRS - NTRK3	PTPR	Secreted Signaling	PMID:21262467;PMID:25385546;	LS	0.433456	71.9626	61.5145	9.12239e-13	-1.59884	92.6994	92.3726	2.6378e-27
633	Interneuron_S2	Layer_5-6_ExN	PTPRS	NTRK3	5.05214e-05	0	PTPRS_NTRK3	PTPRS - NTRK3	PTPR	Secreted Signaling	PMID:21262467;PMID:25385546;	LS	1.69953	92.807	82.6667	1.01223e-24	-1.59884	92.6994	92.3726	2.6378e-27
634	Interneuron_M2	Interneuron_M1	PTPRS	NTRK3	1.11251e-05	0	PTPRS_NTRK3	PTPRS - NTRK3	PTPR	Secreted Signaling	PMID:21262467;PMID:25385546;	LS	0.603037	74.2361	63.2603	1.48355e-16	-1.32192	82.243	84.1286	1.75913e-15
635	IP_IN	Interneuron_M1	PTPRS	NTRK3	6.72032e-06	0.01	PTPRS_NTRK3	PTPRS - NTRK3	PTPR	Secreted Signaling	PMID:21262467;PMID:25385546;	LS	0.136544	52.439	48.6486	0.000978137	-1.32192	82.243	84.1286	1.75913e-15
636	Interneuron_M1	Interneuron_M1	PTPRS	NTRK3	9.83833e-06	0	PTPRS_NTRK3	PTPRS - NTRK3	PTPR	Secreted Signaling	PMID:21262467;PMID:25385546;	LS	0.433456	71.9626	61.5145	9.12239e-13	-1.32192	82.243	84.1286	1.75913e-15
637	Interneuron_S2	Interneuron_M1	PTPRS	NTRK3	3.15795e-05	0	PTPRS_NTRK3	PTPRS - NTRK3	PTPR	Secreted Signaling	PMID:21262467;PMID:25385546;	LS	1.69953	92.807	82.6667	1.01223e-24	-1.32192	82.243	84.1286	1.75913e-15
638	Interneuron_M2	Mig_Layer_2-4_ExN	PTPRS	NTRK3	1.00908e-05	0	PTPRS_NTRK3	PTPRS - NTRK3	PTPR	Secreted Signaling	PMID:21262467;PMID:25385546;	LS	0.603037	74.2361	63.2603	1.48355e-16	0.302142	83.2015	79.505	6.94823e-09
639	IP_IN	Mig_Layer_2-4_ExN	PTPRS	NTRK3	6.0955e-06	0.03	PTPRS_NTRK3	PTPRS - NTRK3	PTPR	Secreted Signaling	PMID:21262467;PMID:25385546;	LS	0.136544	52.439	48.6486	0.000978137	0.302142	83.2015	79.505	6.94823e-09
640	Interneuron_M1	Mig_Layer_2-4_ExN	PTPRS	NTRK3	8.92361e-06	0	PTPRS_NTRK3	PTPRS - NTRK3	PTPR	Secreted Signaling	PMID:21262467;PMID:25385546;	LS	0.433456	71.9626	61.5145	9.12239e-13	0.302142	83.2015	79.505	6.94823e-09
641	Interneuron_S2	Mig_Layer_2-4_ExN	PTPRS	NTRK3	2.86435e-05	0	PTPRS_NTRK3	PTPRS - NTRK3	PTPR	Secreted Signaling	PMID:21262467;PMID:25385546;	LS	1.69953	92.807	82.6667	1.01223e-24	0.302142	83.2015	79.505	6.94823e-09
642	Interneuron_M2	OPC_1	PTPRS	NTRK3	1.22883e-05	0	PTPRS_NTRK3	PTPRS - NTRK3	PTPR	Secreted Signaling	PMID:21262467;PMID:25385546;	LS	0.603037	74.2361	63.2603	1.48355e-16	NA	NA	NA	NA
643	IP_IN	OPC_1	PTPRS	NTRK3	7.42294e-06	0.02	PTPRS_NTRK3	PTPRS - NTRK3	PTPR	Secreted Signaling	PMID:21262467;PMID:25385546;	LS	0.136544	52.439	48.6486	0.000978137	NA	NA	NA	NA
644	Interneuron_M1	OPC_1	PTPRS	NTRK3	1.08669e-05	0	PTPRS_NTRK3	PTPRS - NTRK3	PTPR	Secreted Signaling	PMID:21262467;PMID:25385546;	LS	0.433456	71.9626	61.5145	9.12239e-13	NA	NA	NA	NA
645	Interneuron_S2	OPC_1	PTPRS	NTRK3	3.48811e-05	0	PTPRS_NTRK3	PTPRS - NTRK3	PTPR	Secreted Signaling	PMID:21262467;PMID:25385546;	LS	1.69953	92.807	82.6667	1.01223e-24	NA	NA	NA	NA
646	Interneuron_M2	Layer_4-5_ExN	PTPRS	NTRK3	1.98846e-05	0	PTPRS_NTRK3	PTPRS - NTRK3	PTPR	Secreted Signaling	PMID:21262467;PMID:25385546;	LS	0.603037	74.2361	63.2603	1.48355e-16	NA	NA	NA	NA
647	IP_IN	Layer_4-5_ExN	PTPRS	NTRK3	1.20117e-05	0	PTPRS_NTRK3	PTPRS - NTRK3	PTPR	Secreted Signaling	PMID:21262467;PMID:25385546;	LS	0.136544	52.439	48.6486	0.000978137	NA	NA	NA	NA
648	Interneuron_M1	Layer_4-5_ExN	PTPRS	NTRK3	1.75846e-05	0	PTPRS_NTRK3	PTPRS - NTRK3	PTPR	Secreted Signaling	PMID:21262467;PMID:25385546;	LS	0.433456	71.9626	61.5145	9.12239e-13	NA	NA	NA	NA
649	Interneuron_S2	Layer_4-5_ExN	PTPRS	NTRK3	5.6443e-05	0	PTPRS_NTRK3	PTPRS - NTRK3	PTPR	Secreted Signaling	PMID:21262467;PMID:25385546;	LS	1.69953	92.807	82.6667	1.01223e-24	NA	NA	NA	NA
650	Interneuron_M2	Layer_2-4_ExN	PTPRS	NTRK3	9.68714e-06	0	PTPRS_NTRK3	PTPRS - NTRK3	PTPR	Secreted Signaling	PMID:21262467;PMID:25385546;	LS	0.603037	74.2361	63.2603	1.48355e-16	NA	NA	NA	NA
651	Interneuron_M1	Layer_2-4_ExN	PTPRS	NTRK3	8.56668e-06	0	PTPRS_NTRK3	PTPRS - NTRK3	PTPR	Secreted Signaling	PMID:21262467;PMID:25385546;	LS	0.433456	71.9626	61.5145	9.12239e-13	NA	NA	NA	NA
652	Interneuron_S2	Layer_2-4_ExN	PTPRS	NTRK3	2.74978e-05	0	PTPRS_NTRK3	PTPRS - NTRK3	PTPR	Secreted Signaling	PMID:21262467;PMID:25385546;	LS	1.69953	92.807	82.6667	1.01223e-24	NA	NA	NA	NA
653	Interneuron_S2	Astrocyte_progenitors	PTPRS	NTRK3	1.62961e-05	0	PTPRS_NTRK3	PTPRS - NTRK3	PTPR	Secreted Signaling	PMID:21262467;PMID:25385546;	LS	1.69953	92.807	82.6667	1.01223e-24	0.0853793	69.2708	68.3568	0.00112553
654	Interneuron_M2	Interneuron_S2	PTPRS	NTRK3	1.12367e-05	0	PTPRS_NTRK3	PTPRS - NTRK3	PTPR	Secreted Signaling	PMID:21262467;PMID:25385546;	LS	0.603037	74.2361	63.2603	1.48355e-16	2.63699	75.3509	32.2667	8.36878e-59
655	IP_IN	Interneuron_S2	PTPRS	NTRK3	6.7877e-06	0.03	PTPRS_NTRK3	PTPRS - NTRK3	PTPR	Secreted Signaling	PMID:21262467;PMID:25385546;	LS	0.136544	52.439	48.6486	0.000978137	2.63699	75.3509	32.2667	8.36878e-59
656	Interneuron_M1	Interneuron_S2	PTPRS	NTRK3	9.93697e-06	0	PTPRS_NTRK3	PTPRS - NTRK3	PTPR	Secreted Signaling	PMID:21262467;PMID:25385546;	LS	0.433456	71.9626	61.5145	9.12239e-13	2.63699	75.3509	32.2667	8.36878e-59
657	Interneuron_S2	Interneuron_S2	PTPRS	NTRK3	3.18961e-05	0	PTPRS_NTRK3	PTPRS - NTRK3	PTPR	Secreted Signaling	PMID:21262467;PMID:25385546;	LS	1.69953	92.807	82.6667	1.01223e-24	2.63699	75.3509	32.2667	8.36878e-59
658	Interneuron_S2	OL	PTPRS	NTRK3	1.4368e-05	0	PTPRS_NTRK3	PTPRS - NTRK3	PTPR	Secreted Signaling	PMID:21262467;PMID:25385546;	LS	1.69953	92.807	82.6667	1.01223e-24	NA	NA	NA	NA
659	Interneuron_S2	Layer_4-6_ExN	SLITRK5	PTPRS	1.51089e-06	0	SLITRK5_PTPRS	SLITRK5 - PTPRS	SLITRK	Secreted Signaling	PMID: 30648269;PMID: 30822649	LS	0.287314	34.1228	14.4	3.76135e-15	-0.619631	84.3617	87.1371	8.355e-23
660	Interneuron_S2	oRG	SLITRK5	PTPRS	1.70983e-07	0	SLITRK5_PTPRS	SLITRK5 - PTPRS	SLITRK	Secreted Signaling	PMID: 30648269;PMID: 30822649	LS	0.287314	34.1228	14.4	3.76135e-15	-0.119904	46.6857	50.8104	1.43854e-09
661	Interneuron_S2	IP	SLITRK5	PTPRS	8.33531e-07	0	SLITRK5_PTPRS	SLITRK5 - PTPRS	SLITRK	Secreted Signaling	PMID: 30648269;PMID: 30822649	LS	0.287314	34.1228	14.4	3.76135e-15	NA	NA	NA	NA
662	Interneuron_S2	Interneuron_1	SLITRK5	PTPRS	4.83119e-07	0	SLITRK5_PTPRS	SLITRK5 - PTPRS	SLITRK	Secreted Signaling	PMID: 30648269;PMID: 30822649	LS	0.287314	34.1228	14.4	3.76135e-15	-0.125725	51.8847	56.3817	0.000609381
663	Interneuron_S2	Mig_Layer_2-3_ExN	SLITRK5	PTPRS	1.56385e-06	0	SLITRK5_PTPRS	SLITRK5 - PTPRS	SLITRK	Secreted Signaling	PMID: 30648269;PMID: 30822649	LS	0.287314	34.1228	14.4	3.76135e-15	-0.210581	81.0075	82.0747	2.01094e-32
664	Interneuron_S2	Interneuron_2	SLITRK5	PTPRS	4.54963e-07	0	SLITRK5_PTPRS	SLITRK5 - PTPRS	SLITRK	Secreted Signaling	PMID: 30648269;PMID: 30822649	LS	0.287314	34.1228	14.4	3.76135e-15	-0.207349	52.8874	59.2606	2.04215e-15
665	Interneuron_S2	Interneuron_M2	SLITRK5	PTPRS	1.01709e-06	0	SLITRK5_PTPRS	SLITRK5 - PTPRS	SLITRK	Secreted Signaling	PMID: 30648269;PMID: 30822649	LS	0.287314	34.1228	14.4	3.76135e-15	0.603037	74.2361	63.2603	1.48355e-16
666	Interneuron_S2	IP_IN	SLITRK5	PTPRS	6.1439e-07	0	SLITRK5_PTPRS	SLITRK5 - PTPRS	SLITRK	Secreted Signaling	PMID: 30648269;PMID: 30822649	LS	0.287314	34.1228	14.4	3.76135e-15	0.136544	52.439	48.6486	0.000978137
667	Interneuron_S2	Layer_5-6_ExN	SLITRK5	PTPRS	2.22846e-06	0	SLITRK5_PTPRS	SLITRK5 - PTPRS	SLITRK	Secreted Signaling	PMID: 30648269;PMID: 30822649	LS	0.287314	34.1228	14.4	3.76135e-15	-0.655741	90.3067	92.9593	8.10922e-15
668	Interneuron_S2	Interneuron_3	SLITRK5	PTPRS	6.69374e-07	0	SLITRK5_PTPRS	SLITRK5 - PTPRS	SLITRK	Secreted Signaling	PMID: 30648269;PMID: 30822649	LS	0.287314	34.1228	14.4	3.76135e-15	NA	NA	NA	NA
669	Interneuron_S2	Interneuron_M1	SLITRK5	PTPRS	8.9945e-07	0	SLITRK5_PTPRS	SLITRK5 - PTPRS	SLITRK	Secreted Signaling	PMID: 30648269;PMID: 30822649	LS	0.287314	34.1228	14.4	3.76135e-15	0.433456	71.9626	61.5145	9.12239e-13
670	Interneuron_S2	Mig_Layer_2-4_ExN	SLITRK5	PTPRS	1.91561e-06	0	SLITRK5_PTPRS	SLITRK5 - PTPRS	SLITRK	Secreted Signaling	PMID: 30648269;PMID: 30822649	LS	0.287314	34.1228	14.4	3.76135e-15	-0.390795	89.1864	91.2871	1.93789e-10
671	Interneuron_S2	OPC_1	SLITRK5	PTPRS	4.75174e-07	0	SLITRK5_PTPRS	SLITRK5 - PTPRS	SLITRK	Secreted Signaling	PMID: 30648269;PMID: 30822649	LS	0.287314	34.1228	14.4	3.76135e-15	-0.344373	55.8442	61.9926	0.013257
672	Interneuron_S2	Layer_4-5_ExN	SLITRK5	PTPRS	1.84668e-06	0	SLITRK5_PTPRS	SLITRK5 - PTPRS	SLITRK	Secreted Signaling	PMID: 30648269;PMID: 30822649	LS	0.287314	34.1228	14.4	3.76135e-15	-0.879632	87.6948	91.6497	5.74347e-05
673	Interneuron_S2	Interneuron_S1	SLITRK5	PTPRS	7.91716e-07	0	SLITRK5_PTPRS	SLITRK5 - PTPRS	SLITRK	Secreted Signaling	PMID: 30648269;PMID: 30822649	LS	0.287314	34.1228	14.4	3.76135e-15	NA	NA	NA	NA
674	Interneuron_S2	vRG	SLITRK5	PTPRS	1.58889e-07	0	SLITRK5_PTPRS	SLITRK5 - PTPRS	SLITRK	Secreted Signaling	PMID: 30648269;PMID: 30822649	LS	0.287314	34.1228	14.4	3.76135e-15	-0.148542	41.3968	48.7552	0.000251809
675	Interneuron_S2	Cycling_progenitors	SLITRK5	PTPRS	7.23835e-07	0	SLITRK5_PTPRS	SLITRK5 - PTPRS	SLITRK	Secreted Signaling	PMID: 30648269;PMID: 30822649	LS	0.287314	34.1228	14.4	3.76135e-15	NA	NA	NA	NA
676	Interneuron_S2	Layer_2-4_ExN	SLITRK5	PTPRS	1.94439e-06	0	SLITRK5_PTPRS	SLITRK5 - PTPRS	SLITRK	Secreted Signaling	PMID: 30648269;PMID: 30822649	LS	0.287314	34.1228	14.4	3.76135e-15	-0.463994	89.5987	89.3503	9.23366e-13
677	Interneuron_S2	Interneuron_4	SLITRK5	PTPRS	7.46733e-07	0	SLITRK5_PTPRS	SLITRK5 - PTPRS	SLITRK	Secreted Signaling	PMID: 30648269;PMID: 30822649	LS	0.287314	34.1228	14.4	3.76135e-15	NA	NA	NA	NA
678	Interneuron_S2	Astrocyte_progenitors	SLITRK5	PTPRS	4.19682e-07	0	SLITRK5_PTPRS	SLITRK5 - PTPRS	SLITRK	Secreted Signaling	PMID: 30648269;PMID: 30822649	LS	0.287314	34.1228	14.4	3.76135e-15	-0.375095	53.3482	66.1972	1.65547e-09
679	Interneuron_S2	Smooth_muscle_2	SLITRK5	PTPRS	9.36016e-08	0	SLITRK5_PTPRS	SLITRK5 - PTPRS	SLITRK	Secreted Signaling	PMID: 30648269;PMID: 30822649	LS	0.287314	34.1228	14.4	3.76135e-15	0.27244	27.7778	18.3544	0.0388318
680	Interneuron_S2	Smooth_muscle_1	SLITRK5	PTPRS	2.11532e-07	0	SLITRK5_PTPRS	SLITRK5 - PTPRS	SLITRK	Secreted Signaling	PMID: 30648269;PMID: 30822649	LS	0.287314	34.1228	14.4	3.76135e-15	NA	NA	NA	NA
681	Interneuron_S2	Interneuron_S2	SLITRK5	PTPRS	2.88715e-06	0	SLITRK5_PTPRS	SLITRK5 - PTPRS	SLITRK	Secreted Signaling	PMID: 30648269;PMID: 30822649	LS	0.287314	34.1228	14.4	3.76135e-15	1.69953	92.807	82.6667	1.01223e-24
682	Interneuron_S2	OL	SLITRK5	PTPRS	7.27589e-07	0	SLITRK5_PTPRS	SLITRK5 - PTPRS	SLITRK	Secreted Signaling	PMID: 30648269;PMID: 30822649	LS	0.287314	34.1228	14.4	3.76135e-15	NA	NA	NA	NA
683	Layer_4-6_ExN	Layer_4-6_ExN	SLIT1	ROBO1	5.43509e-05	0	SLIT1_ROBO1	SLIT1 - ROBO1	SLIT	Secreted Signaling	PMID:10102268	LS	0.354012	85.8777	82.3962	3.01596e-07	-2.95744	88.0585	87.6883	2.38244e-16
684	Interneuron_1	Layer_4-6_ExN	SLIT1	ROBO1	5.95628e-06	0	SLIT1_ROBO1	SLIT1 - ROBO1	SLIT	Secreted Signaling	PMID:10102268	LS	0.242598	47.0067	31.2161	3.04991e-27	-2.95744	88.0585	87.6883	2.38244e-16
685	Interneuron_M1	Layer_4-6_ExN	SLIT1	ROBO1	5.40168e-06	0	SLIT1_ROBO1	SLIT1 - ROBO1	SLIT	Secreted Signaling	PMID:10102268	LS	0.0718687	34.5016	26.556	0.00063658	-2.95744	88.0585	87.6883	2.38244e-16
686	Mig_Layer_2-4_ExN	Layer_4-6_ExN	SLIT1	ROBO1	5.70912e-06	0	SLIT1_ROBO1	SLIT1 - ROBO1	SLIT	Secreted Signaling	PMID:10102268	LS	0.0925536	41.8746	36.9307	3.00124e-07	-2.95744	88.0585	87.6883	2.38244e-16
687	Interneuron_4	Layer_4-6_ExN	SLIT1	ROBO1	5.61888e-06	0	SLIT1_ROBO1	SLIT1 - ROBO1	SLIT	Secreted Signaling	PMID:10102268	LS	0.307762	46.2185	32.8767	0.0388427	-2.95744	88.0585	87.6883	2.38244e-16
688	Interneuron_S2	Layer_4-6_ExN	SLIT1	ROBO1	2.84271e-05	0	SLIT1_ROBO1	SLIT1 - ROBO1	SLIT	Secreted Signaling	PMID:10102268	LS	1.35928	66.4035	18.4	3.19933e-59	-2.95744	88.0585	87.6883	2.38244e-16
689	Layer_4-6_ExN	oRG	SLIT1	ROBO1	1.08409e-05	0	SLIT1_ROBO1	SLIT1 - ROBO1	SLIT	Secreted Signaling	PMID:10102268	LS	0.354012	85.8777	82.3962	3.01596e-07	-0.0576026	75.439	67.8444	3.1653e-07
690	Interneuron_S2	oRG	SLIT1	ROBO1	5.66995e-06	0	SLIT1_ROBO1	SLIT1 - ROBO1	SLIT	Secreted Signaling	PMID:10102268	LS	1.35928	66.4035	18.4	3.19933e-59	-0.0576026	75.439	67.8444	3.1653e-07
691	Layer_4-6_ExN	IP	SLIT1	ROBO1	8.02923e-06	0	SLIT1_ROBO1	SLIT1 - ROBO1	SLIT	Secreted Signaling	PMID:10102268	LS	0.354012	85.8777	82.3962	3.01596e-07	NA	NA	NA	NA
692	Interneuron_S2	IP	SLIT1	ROBO1	4.19942e-06	0	SLIT1_ROBO1	SLIT1 - ROBO1	SLIT	Secreted Signaling	PMID:10102268	LS	1.35928	66.4035	18.4	3.19933e-59	NA	NA	NA	NA
693	Layer_4-6_ExN	Interneuron_1	SLIT1	ROBO1	4.99358e-06	0	SLIT1_ROBO1	SLIT1 - ROBO1	SLIT	Secreted Signaling	PMID:10102268	LS	0.354012	85.8777	82.3962	3.01596e-07	0.0593155	51.2934	45.5449	3.14969e-05
694	Interneuron_S2	Interneuron_1	SLIT1	ROBO1	2.61172e-06	0	SLIT1_ROBO1	SLIT1 - ROBO1	SLIT	Secreted Signaling	PMID:10102268	LS	1.35928	66.4035	18.4	3.19933e-59	0.0593155	51.2934	45.5449	3.14969e-05
695	Layer_4-6_ExN	Mig_Layer_2-3_ExN	SLIT1	ROBO1	1.52171e-05	0	SLIT1_ROBO1	SLIT1 - ROBO1	SLIT	Secreted Signaling	PMID:10102268	LS	0.354012	85.8777	82.3962	3.01596e-07	-0.352213	76.8844	77.6933	5.94139e-20
696	Interneuron_S2	Mig_Layer_2-3_ExN	SLIT1	ROBO1	7.95883e-06	0	SLIT1_ROBO1	SLIT1 - ROBO1	SLIT	Secreted Signaling	PMID:10102268	LS	1.35928	66.4035	18.4	3.19933e-59	-0.352213	76.8844	77.6933	5.94139e-20
697	Layer_4-6_ExN	Interneuron_2	SLIT1	ROBO1	2.86812e-05	0	SLIT1_ROBO1	SLIT1 - ROBO1	SLIT	Secreted Signaling	PMID:10102268	LS	0.354012	85.8777	82.3962	3.01596e-07	1.48042	81.5688	71.8115	7.23441e-42
698	Interneuron_1	Interneuron_2	SLIT1	ROBO1	3.14308e-06	0	SLIT1_ROBO1	SLIT1 - ROBO1	SLIT	Secreted Signaling	PMID:10102268	LS	0.242598	47.0067	31.2161	3.04991e-27	1.48042	81.5688	71.8115	7.23441e-42
699	Interneuron_M1	Interneuron_2	SLIT1	ROBO1	2.85042e-06	0	SLIT1_ROBO1	SLIT1 - ROBO1	SLIT	Secreted Signaling	PMID:10102268	LS	0.0718687	34.5016	26.556	0.00063658	1.48042	81.5688	71.8115	7.23441e-42
700	Mig_Layer_2-4_ExN	Interneuron_2	SLIT1	ROBO1	3.01266e-06	0	SLIT1_ROBO1	SLIT1 - ROBO1	SLIT	Secreted Signaling	PMID:10102268	LS	0.0925536	41.8746	36.9307	3.00124e-07	1.48042	81.5688	71.8115	7.23441e-42
701	Interneuron_4	Interneuron_2	SLIT1	ROBO1	2.96503e-06	0.01	SLIT1_ROBO1	SLIT1 - ROBO1	SLIT	Secreted Signaling	PMID:10102268	LS	0.307762	46.2185	32.8767	0.0388427	1.48042	81.5688	71.8115	7.23441e-42
702	Interneuron_S2	Interneuron_2	SLIT1	ROBO1	1.50009e-05	0	SLIT1_ROBO1	SLIT1 - ROBO1	SLIT	Secreted Signaling	PMID:10102268	LS	1.35928	66.4035	18.4	3.19933e-59	1.48042	81.5688	71.8115	7.23441e-42
703	Layer_4-6_ExN	Interneuron_M2	SLIT1	ROBO1	0.00017981	0	SLIT1_ROBO1	SLIT1 - ROBO1	SLIT	Secreted Signaling	PMID:10102268	LS	0.354012	85.8777	82.3962	3.01596e-07	NA	NA	NA	NA
704	Interneuron_1	Interneuron_M2	SLIT1	ROBO1	1.97075e-05	0	SLIT1_ROBO1	SLIT1 - ROBO1	SLIT	Secreted Signaling	PMID:10102268	LS	0.242598	47.0067	31.2161	3.04991e-27	NA	NA	NA	NA
705	Interneuron_M1	Interneuron_M2	SLIT1	ROBO1	1.78725e-05	0	SLIT1_ROBO1	SLIT1 - ROBO1	SLIT	Secreted Signaling	PMID:10102268	LS	0.0718687	34.5016	26.556	0.00063658	NA	NA	NA	NA
706	Mig_Layer_2-4_ExN	Interneuron_M2	SLIT1	ROBO1	1.88897e-05	0	SLIT1_ROBO1	SLIT1 - ROBO1	SLIT	Secreted Signaling	PMID:10102268	LS	0.0925536	41.8746	36.9307	3.00124e-07	NA	NA	NA	NA
707	Interneuron_4	Interneuron_M2	SLIT1	ROBO1	1.85911e-05	0	SLIT1_ROBO1	SLIT1 - ROBO1	SLIT	Secreted Signaling	PMID:10102268	LS	0.307762	46.2185	32.8767	0.0388427	NA	NA	NA	NA
708	Interneuron_S2	Interneuron_M2	SLIT1	ROBO1	9.40515e-05	0	SLIT1_ROBO1	SLIT1 - ROBO1	SLIT	Secreted Signaling	PMID:10102268	LS	1.35928	66.4035	18.4	3.19933e-59	NA	NA	NA	NA
709	Layer_4-6_ExN	IP_IN	SLIT1	ROBO1	4.41503e-06	0	SLIT1_ROBO1	SLIT1 - ROBO1	SLIT	Secreted Signaling	PMID:10102268	LS	0.354012	85.8777	82.3962	3.01596e-07	0.162732	49.3902	43.0931	0.00526084
710	Layer_4-6_ExN	Layer_5-6_ExN	SLIT1	ROBO1	0.00013554	0	SLIT1_ROBO1	SLIT1 - ROBO1	SLIT	Secreted Signaling	PMID:10102268	LS	0.354012	85.8777	82.3962	3.01596e-07	-5.79483	95	87.5688	3.16189e-08
711	Interneuron_1	Layer_5-6_ExN	SLIT1	ROBO1	1.48548e-05	0	SLIT1_ROBO1	SLIT1 - ROBO1	SLIT	Secreted Signaling	PMID:10102268	LS	0.242598	47.0067	31.2161	3.04991e-27	-5.79483	95	87.5688	3.16189e-08
712	Interneuron_M1	Layer_5-6_ExN	SLIT1	ROBO1	1.34716e-05	0	SLIT1_ROBO1	SLIT1 - ROBO1	SLIT	Secreted Signaling	PMID:10102268	LS	0.0718687	34.5016	26.556	0.00063658	-5.79483	95	87.5688	3.16189e-08
713	Mig_Layer_2-4_ExN	Layer_5-6_ExN	SLIT1	ROBO1	1.42384e-05	0	SLIT1_ROBO1	SLIT1 - ROBO1	SLIT	Secreted Signaling	PMID:10102268	LS	0.0925536	41.8746	36.9307	3.00124e-07	-5.79483	95	87.5688	3.16189e-08
714	Interneuron_4	Layer_5-6_ExN	SLIT1	ROBO1	1.40133e-05	0	SLIT1_ROBO1	SLIT1 - ROBO1	SLIT	Secreted Signaling	PMID:10102268	LS	0.307762	46.2185	32.8767	0.0388427	-5.79483	95	87.5688	3.16189e-08
715	Interneuron_S2	Layer_5-6_ExN	SLIT1	ROBO1	7.08938e-05	0	SLIT1_ROBO1	SLIT1 - ROBO1	SLIT	Secreted Signaling	PMID:10102268	LS	1.35928	66.4035	18.4	3.19933e-59	-5.79483	95	87.5688	3.16189e-08
716	Layer_4-6_ExN	Interneuron_3	SLIT1	ROBO1	3.03603e-05	0	SLIT1_ROBO1	SLIT1 - ROBO1	SLIT	Secreted Signaling	PMID:10102268	LS	0.354012	85.8777	82.3962	3.01596e-07	2.55983	82.8571	69.9915	8.34449e-30
717	Interneuron_1	Interneuron_3	SLIT1	ROBO1	3.32709e-06	0	SLIT1_ROBO1	SLIT1 - ROBO1	SLIT	Secreted Signaling	PMID:10102268	LS	0.242598	47.0067	31.2161	3.04991e-27	2.55983	82.8571	69.9915	8.34449e-30
718	Interneuron_M1	Interneuron_3	SLIT1	ROBO1	3.0173e-06	0	SLIT1_ROBO1	SLIT1 - ROBO1	SLIT	Secreted Signaling	PMID:10102268	LS	0.0718687	34.5016	26.556	0.00063658	2.55983	82.8571	69.9915	8.34449e-30
719	Mig_Layer_2-4_ExN	Interneuron_3	SLIT1	ROBO1	3.18903e-06	0	SLIT1_ROBO1	SLIT1 - ROBO1	SLIT	Secreted Signaling	PMID:10102268	LS	0.0925536	41.8746	36.9307	3.00124e-07	2.55983	82.8571	69.9915	8.34449e-30
720	Interneuron_4	Interneuron_3	SLIT1	ROBO1	3.13862e-06	0	SLIT1_ROBO1	SLIT1 - ROBO1	SLIT	Secreted Signaling	PMID:10102268	LS	0.307762	46.2185	32.8767	0.0388427	2.55983	82.8571	69.9915	8.34449e-30
721	Interneuron_S2	Interneuron_3	SLIT1	ROBO1	1.58791e-05	0	SLIT1_ROBO1	SLIT1 - ROBO1	SLIT	Secreted Signaling	PMID:10102268	LS	1.35928	66.4035	18.4	3.19933e-59	2.55983	82.8571	69.9915	8.34449e-30
722	Layer_4-6_ExN	Interneuron_M1	SLIT1	ROBO1	0.000150054	0	SLIT1_ROBO1	SLIT1 - ROBO1	SLIT	Secreted Signaling	PMID:10102268	LS	0.354012	85.8777	82.3962	3.01596e-07	0.136397	99.0654	99.0664	0.0321304
723	Interneuron_1	Interneuron_M1	SLIT1	ROBO1	1.64457e-05	0	SLIT1_ROBO1	SLIT1 - ROBO1	SLIT	Secreted Signaling	PMID:10102268	LS	0.242598	47.0067	31.2161	3.04991e-27	0.136397	99.0654	99.0664	0.0321304
724	Interneuron_M1	Interneuron_M1	SLIT1	ROBO1	1.49144e-05	0	SLIT1_ROBO1	SLIT1 - ROBO1	SLIT	Secreted Signaling	PMID:10102268	LS	0.0718687	34.5016	26.556	0.00063658	0.136397	99.0654	99.0664	0.0321304
725	Mig_Layer_2-4_ExN	Interneuron_M1	SLIT1	ROBO1	1.57633e-05	0	SLIT1_ROBO1	SLIT1 - ROBO1	SLIT	Secreted Signaling	PMID:10102268	LS	0.0925536	41.8746	36.9307	3.00124e-07	0.136397	99.0654	99.0664	0.0321304
726	Interneuron_4	Interneuron_M1	SLIT1	ROBO1	1.55141e-05	0	SLIT1_ROBO1	SLIT1 - ROBO1	SLIT	Secreted Signaling	PMID:10102268	LS	0.307762	46.2185	32.8767	0.0388427	0.136397	99.0654	99.0664	0.0321304
727	Interneuron_S2	Interneuron_M1	SLIT1	ROBO1	7.84861e-05	0	SLIT1_ROBO1	SLIT1 - ROBO1	SLIT	Secreted Signaling	PMID:10102268	LS	1.35928	66.4035	18.4	3.19933e-59	0.136397	99.0654	99.0664	0.0321304
728	Layer_4-6_ExN	Mig_Layer_2-4_ExN	SLIT1	ROBO1	1.72727e-05	0	SLIT1_ROBO1	SLIT1 - ROBO1	SLIT	Secreted Signaling	PMID:10102268	LS	0.354012	85.8777	82.3962	3.01596e-07	1.74409	75.0862	69.802	3.4992e-19
729	Interneuron_S2	Mig_Layer_2-4_ExN	SLIT1	ROBO1	9.03397e-06	0	SLIT1_ROBO1	SLIT1 - ROBO1	SLIT	Secreted Signaling	PMID:10102268	LS	1.35928	66.4035	18.4	3.19933e-59	1.74409	75.0862	69.802	3.4992e-19
730	Layer_4-6_ExN	OPC_1	SLIT1	ROBO1	1.02436e-05	0	SLIT1_ROBO1	SLIT1 - ROBO1	SLIT	Secreted Signaling	PMID:10102268	LS	0.354012	85.8777	82.3962	3.01596e-07	0.259759	69.0167	64.2066	0.005385
731	Interneuron_S2	OPC_1	SLIT1	ROBO1	5.35757e-06	0	SLIT1_ROBO1	SLIT1 - ROBO1	SLIT	Secreted Signaling	PMID:10102268	LS	1.35928	66.4035	18.4	3.19933e-59	0.259759	69.0167	64.2066	0.005385
732	Layer_4-6_ExN	Layer_4-5_ExN	SLIT1	ROBO1	0.00010741	0	SLIT1_ROBO1	SLIT1 - ROBO1	SLIT	Secreted Signaling	PMID:10102268	LS	0.354012	85.8777	82.3962	3.01596e-07	4.17058	93.4372	90.4277	8.32126e-17
733	Interneuron_1	Layer_4-5_ExN	SLIT1	ROBO1	1.17716e-05	0	SLIT1_ROBO1	SLIT1 - ROBO1	SLIT	Secreted Signaling	PMID:10102268	LS	0.242598	47.0067	31.2161	3.04991e-27	4.17058	93.4372	90.4277	8.32126e-17
734	Interneuron_M1	Layer_4-5_ExN	SLIT1	ROBO1	1.06755e-05	0	SLIT1_ROBO1	SLIT1 - ROBO1	SLIT	Secreted Signaling	PMID:10102268	LS	0.0718687	34.5016	26.556	0.00063658	4.17058	93.4372	90.4277	8.32126e-17
735	Mig_Layer_2-4_ExN	Layer_4-5_ExN	SLIT1	ROBO1	1.12831e-05	0	SLIT1_ROBO1	SLIT1 - ROBO1	SLIT	Secreted Signaling	PMID:10102268	LS	0.0925536	41.8746	36.9307	3.00124e-07	4.17058	93.4372	90.4277	8.32126e-17
736	Interneuron_4	Layer_4-5_ExN	SLIT1	ROBO1	1.11047e-05	0	SLIT1_ROBO1	SLIT1 - ROBO1	SLIT	Secreted Signaling	PMID:10102268	LS	0.307762	46.2185	32.8767	0.0388427	4.17058	93.4372	90.4277	8.32126e-17
737	Interneuron_S2	Layer_4-5_ExN	SLIT1	ROBO1	5.618e-05	0	SLIT1_ROBO1	SLIT1 - ROBO1	SLIT	Secreted Signaling	PMID:10102268	LS	1.35928	66.4035	18.4	3.19933e-59	4.17058	93.4372	90.4277	8.32126e-17
738	Layer_4-6_ExN	Interneuron_S1	SLIT1	ROBO1	2.0541e-05	0	SLIT1_ROBO1	SLIT1 - ROBO1	SLIT	Secreted Signaling	PMID:10102268	LS	0.354012	85.8777	82.3962	3.01596e-07	NA	NA	NA	NA
739	Interneuron_S2	Interneuron_S1	SLIT1	ROBO1	1.07434e-05	0	SLIT1_ROBO1	SLIT1 - ROBO1	SLIT	Secreted Signaling	PMID:10102268	LS	1.35928	66.4035	18.4	3.19933e-59	NA	NA	NA	NA
740	Layer_4-6_ExN	vRG	SLIT1	ROBO1	6.95644e-06	0	SLIT1_ROBO1	SLIT1 - ROBO1	SLIT	Secreted Signaling	PMID:10102268	LS	0.354012	85.8777	82.3962	3.01596e-07	-0.348813	61.4372	63.7967	0.035588
741	Interneuron_S2	vRG	SLIT1	ROBO1	3.63833e-06	0	SLIT1_ROBO1	SLIT1 - ROBO1	SLIT	Secreted Signaling	PMID:10102268	LS	1.35928	66.4035	18.4	3.19933e-59	-0.348813	61.4372	63.7967	0.035588
742	Layer_4-6_ExN	Cycling_progenitors	SLIT1	ROBO1	1.49964e-05	0	SLIT1_ROBO1	SLIT1 - ROBO1	SLIT	Secreted Signaling	PMID:10102268	LS	0.354012	85.8777	82.3962	3.01596e-07	0.277098	77.9124	64.5556	3.64892e-11
743	Interneuron_S2	Cycling_progenitors	SLIT1	ROBO1	7.84338e-06	0	SLIT1_ROBO1	SLIT1 - ROBO1	SLIT	Secreted Signaling	PMID:10102268	LS	1.35928	66.4035	18.4	3.19933e-59	0.277098	77.9124	64.5556	3.64892e-11
744	Layer_4-6_ExN	Layer_2-4_ExN	SLIT1	ROBO1	1.33185e-05	0	SLIT1_ROBO1	SLIT1 - ROBO1	SLIT	Secreted Signaling	PMID:10102268	LS	0.354012	85.8777	82.3962	3.01596e-07	-8.2465	59.7853	73.913	3.36627e-137
745	Interneuron_S2	Layer_2-4_ExN	SLIT1	ROBO1	6.96582e-06	0	SLIT1_ROBO1	SLIT1 - ROBO1	SLIT	Secreted Signaling	PMID:10102268	LS	1.35928	66.4035	18.4	3.19933e-59	-8.2465	59.7853	73.913	3.36627e-137
746	Layer_4-6_ExN	Interneuron_4	SLIT1	ROBO1	9.67996e-05	0	SLIT1_ROBO1	SLIT1 - ROBO1	SLIT	Secreted Signaling	PMID:10102268	LS	0.354012	85.8777	82.3962	3.01596e-07	3.6977	92.437	83.5616	0.00283634
747	Interneuron_1	Interneuron_4	SLIT1	ROBO1	1.06086e-05	0	SLIT1_ROBO1	SLIT1 - ROBO1	SLIT	Secreted Signaling	PMID:10102268	LS	0.242598	47.0067	31.2161	3.04991e-27	3.6977	92.437	83.5616	0.00283634
748	Interneuron_M1	Interneuron_4	SLIT1	ROBO1	9.62081e-06	0	SLIT1_ROBO1	SLIT1 - ROBO1	SLIT	Secreted Signaling	PMID:10102268	LS	0.0718687	34.5016	26.556	0.00063658	3.6977	92.437	83.5616	0.00283634
749	Mig_Layer_2-4_ExN	Interneuron_4	SLIT1	ROBO1	1.01684e-05	0	SLIT1_ROBO1	SLIT1 - ROBO1	SLIT	Secreted Signaling	PMID:10102268	LS	0.0925536	41.8746	36.9307	3.00124e-07	3.6977	92.437	83.5616	0.00283634
750	Interneuron_4	Interneuron_4	SLIT1	ROBO1	1.00077e-05	0	SLIT1_ROBO1	SLIT1 - ROBO1	SLIT	Secreted Signaling	PMID:10102268	LS	0.307762	46.2185	32.8767	0.0388427	3.6977	92.437	83.5616	0.00283634
751	Interneuron_S2	Interneuron_4	SLIT1	ROBO1	5.06299e-05	0	SLIT1_ROBO1	SLIT1 - ROBO1	SLIT	Secreted Signaling	PMID:10102268	LS	1.35928	66.4035	18.4	3.19933e-59	3.6977	92.437	83.5616	0.00283634
752	Layer_4-6_ExN	Astrocyte_progenitors	SLIT1	ROBO1	1.55905e-05	0	SLIT1_ROBO1	SLIT1 - ROBO1	SLIT	Secreted Signaling	PMID:10102268	LS	0.354012	85.8777	82.3962	3.01596e-07	0.91619	72.9167	67.23	2.26083e-12
753	Interneuron_S2	Astrocyte_progenitors	SLIT1	ROBO1	8.15413e-06	0	SLIT1_ROBO1	SLIT1 - ROBO1	SLIT	Secreted Signaling	PMID:10102268	LS	1.35928	66.4035	18.4	3.19933e-59	0.91619	72.9167	67.23	2.26083e-12
754	Layer_4-6_ExN	Smooth_muscle_1	SLIT1	ROBO1	6.46964e-06	0	SLIT1_ROBO1	SLIT1 - ROBO1	SLIT	Secreted Signaling	PMID:10102268	LS	0.354012	85.8777	82.3962	3.01596e-07	NA	NA	NA	NA
755	Interneuron_S2	Smooth_muscle_1	SLIT1	ROBO1	3.38373e-06	0.01	SLIT1_ROBO1	SLIT1 - ROBO1	SLIT	Secreted Signaling	PMID:10102268	LS	1.35928	66.4035	18.4	3.19933e-59	NA	NA	NA	NA
756	Layer_4-6_ExN	Interneuron_S2	SLIT1	ROBO1	0.000196086	0	SLIT1_ROBO1	SLIT1 - ROBO1	SLIT	Secreted Signaling	PMID:10102268	LS	0.354012	85.8777	82.3962	3.01596e-07	24.3064	94.2982	66.6667	3.68033e-90
757	Interneuron_1	Interneuron_S2	SLIT1	ROBO1	2.14917e-05	0	SLIT1_ROBO1	SLIT1 - ROBO1	SLIT	Secreted Signaling	PMID:10102268	LS	0.242598	47.0067	31.2161	3.04991e-27	24.3064	94.2982	66.6667	3.68033e-90
758	Interneuron_M1	Interneuron_S2	SLIT1	ROBO1	1.94906e-05	0	SLIT1_ROBO1	SLIT1 - ROBO1	SLIT	Secreted Signaling	PMID:10102268	LS	0.0718687	34.5016	26.556	0.00063658	24.3064	94.2982	66.6667	3.68033e-90
759	Mig_Layer_2-4_ExN	Interneuron_S2	SLIT1	ROBO1	2.05999e-05	0	SLIT1_ROBO1	SLIT1 - ROBO1	SLIT	Secreted Signaling	PMID:10102268	LS	0.0925536	41.8746	36.9307	3.00124e-07	24.3064	94.2982	66.6667	3.68033e-90
760	Interneuron_4	Interneuron_S2	SLIT1	ROBO1	2.02743e-05	0	SLIT1_ROBO1	SLIT1 - ROBO1	SLIT	Secreted Signaling	PMID:10102268	LS	0.307762	46.2185	32.8767	0.0388427	24.3064	94.2982	66.6667	3.68033e-90
761	Interneuron_S2	Interneuron_S2	SLIT1	ROBO1	0.000102566	0	SLIT1_ROBO1	SLIT1 - ROBO1	SLIT	Secreted Signaling	PMID:10102268	LS	1.35928	66.4035	18.4	3.19933e-59	24.3064	94.2982	66.6667	3.68033e-90
762	Layer_4-6_ExN	OL	SLIT1	ROBO1	4.05973e-06	0	SLIT1_ROBO1	SLIT1 - ROBO1	SLIT	Secreted Signaling	PMID:10102268	LS	0.354012	85.8777	82.3962	3.01596e-07	0.339441	51.2821	36.3636	0.0250701
763	Astrocyte_progenitors	Layer_4-6_ExN	SLIT2	ROBO1	5.77652e-06	0	SLIT2_ROBO1	SLIT2 - ROBO1	SLIT	Secreted Signaling	PMID:10102268	LS	0.611869	31.1012	12.4883	8.83961e-31	-2.95744	88.0585	87.6883	2.38244e-16
764	Interneuron_S2	Layer_4-6_ExN	SLIT2	ROBO1	4.29961e-05	0	SLIT2_ROBO1	SLIT2 - ROBO1	SLIT	Secreted Signaling	PMID:10102268	LS	3.67163	66.4912	21.0667	7.27869e-60	-2.95744	88.0585	87.6883	2.38244e-16
765	Astrocyte_progenitors	oRG	SLIT2	ROBO1	1.15214e-06	0	SLIT2_ROBO1	SLIT2 - ROBO1	SLIT	Secreted Signaling	PMID:10102268	LS	0.611869	31.1012	12.4883	8.83961e-31	-0.0576026	75.439	67.8444	3.1653e-07
766	Interneuron_S2	oRG	SLIT2	ROBO1	8.57594e-06	0	SLIT2_ROBO1	SLIT2 - ROBO1	SLIT	Secreted Signaling	PMID:10102268	LS	3.67163	66.4912	21.0667	7.27869e-60	-0.0576026	75.439	67.8444	3.1653e-07
767	Astrocyte_progenitors	IP	SLIT2	ROBO1	8.53327e-07	0	SLIT2_ROBO1	SLIT2 - ROBO1	SLIT	Secreted Signaling	PMID:10102268	LS	0.611869	31.1012	12.4883	8.83961e-31	NA	NA	NA	NA
768	Interneuron_S2	IP	SLIT2	ROBO1	6.35173e-06	0	SLIT2_ROBO1	SLIT2 - ROBO1	SLIT	Secreted Signaling	PMID:10102268	LS	3.67163	66.4912	21.0667	7.27869e-60	NA	NA	NA	NA
769	Astrocyte_progenitors	Interneuron_1	SLIT2	ROBO1	5.30704e-07	0	SLIT2_ROBO1	SLIT2 - ROBO1	SLIT	Secreted Signaling	PMID:10102268	LS	0.611869	31.1012	12.4883	8.83961e-31	0.0593155	51.2934	45.5449	3.14969e-05
770	Interneuron_S2	Interneuron_1	SLIT2	ROBO1	3.9503e-06	0	SLIT2_ROBO1	SLIT2 - ROBO1	SLIT	Secreted Signaling	PMID:10102268	LS	3.67163	66.4912	21.0667	7.27869e-60	0.0593155	51.2934	45.5449	3.14969e-05
771	Astrocyte_progenitors	Mig_Layer_2-3_ExN	SLIT2	ROBO1	1.61725e-06	0	SLIT2_ROBO1	SLIT2 - ROBO1	SLIT	Secreted Signaling	PMID:10102268	LS	0.611869	31.1012	12.4883	8.83961e-31	-0.352213	76.8844	77.6933	5.94139e-20
772	Interneuron_S2	Mig_Layer_2-3_ExN	SLIT2	ROBO1	1.20379e-05	0	SLIT2_ROBO1	SLIT2 - ROBO1	SLIT	Secreted Signaling	PMID:10102268	LS	3.67163	66.4912	21.0667	7.27869e-60	-0.352213	76.8844	77.6933	5.94139e-20
773	Astrocyte_progenitors	Interneuron_2	SLIT2	ROBO1	3.04822e-06	0	SLIT2_ROBO1	SLIT2 - ROBO1	SLIT	Secreted Signaling	PMID:10102268	LS	0.611869	31.1012	12.4883	8.83961e-31	1.48042	81.5688	71.8115	7.23441e-42
774	Interneuron_S2	Interneuron_2	SLIT2	ROBO1	2.26891e-05	0	SLIT2_ROBO1	SLIT2 - ROBO1	SLIT	Secreted Signaling	PMID:10102268	LS	3.67163	66.4912	21.0667	7.27869e-60	1.48042	81.5688	71.8115	7.23441e-42
775	Astrocyte_progenitors	Interneuron_M2	SLIT2	ROBO1	1.91127e-05	0	SLIT2_ROBO1	SLIT2 - ROBO1	SLIT	Secreted Signaling	PMID:10102268	LS	0.611869	31.1012	12.4883	8.83961e-31	NA	NA	NA	NA
776	Interneuron_S2	Interneuron_M2	SLIT2	ROBO1	0.000142249	0	SLIT2_ROBO1	SLIT2 - ROBO1	SLIT	Secreted Signaling	PMID:10102268	LS	3.67163	66.4912	21.0667	7.27869e-60	NA	NA	NA	NA
777	Astrocyte_progenitors	IP_IN	SLIT2	ROBO1	4.69217e-07	0	SLIT2_ROBO1	SLIT2 - ROBO1	SLIT	Secreted Signaling	PMID:10102268	LS	0.611869	31.1012	12.4883	8.83961e-31	0.162732	49.3902	43.0931	0.00526084
778	Interneuron_S2	IP_IN	SLIT2	ROBO1	3.49262e-06	0	SLIT2_ROBO1	SLIT2 - ROBO1	SLIT	Secreted Signaling	PMID:10102268	LS	3.67163	66.4912	21.0667	7.27869e-60	0.162732	49.3902	43.0931	0.00526084
779	Astrocyte_progenitors	Layer_5-6_ExN	SLIT2	ROBO1	1.44065e-05	0	SLIT2_ROBO1	SLIT2 - ROBO1	SLIT	Secreted Signaling	PMID:10102268	LS	0.611869	31.1012	12.4883	8.83961e-31	-5.79483	95	87.5688	3.16189e-08
780	Interneuron_S2	Layer_5-6_ExN	SLIT2	ROBO1	0.000107225	0	SLIT2_ROBO1	SLIT2 - ROBO1	SLIT	Secreted Signaling	PMID:10102268	LS	3.67163	66.4912	21.0667	7.27869e-60	-5.79483	95	87.5688	3.16189e-08
781	Astrocyte_progenitors	Interneuron_3	SLIT2	ROBO1	3.22668e-06	0	SLIT2_ROBO1	SLIT2 - ROBO1	SLIT	Secreted Signaling	PMID:10102268	LS	0.611869	31.1012	12.4883	8.83961e-31	2.55983	82.8571	69.9915	8.34449e-30
782	Interneuron_S2	Interneuron_3	SLIT2	ROBO1	2.40174e-05	0	SLIT2_ROBO1	SLIT2 - ROBO1	SLIT	Secreted Signaling	PMID:10102268	LS	3.67163	66.4912	21.0667	7.27869e-60	2.55983	82.8571	69.9915	8.34449e-30
783	Astrocyte_progenitors	Interneuron_M1	SLIT2	ROBO1	1.59494e-05	0	SLIT2_ROBO1	SLIT2 - ROBO1	SLIT	Secreted Signaling	PMID:10102268	LS	0.611869	31.1012	12.4883	8.83961e-31	0.136397	99.0654	99.0664	0.0321304
784	Interneuron_S2	Interneuron_M1	SLIT2	ROBO1	0.000118708	0	SLIT2_ROBO1	SLIT2 - ROBO1	SLIT	Secreted Signaling	PMID:10102268	LS	3.67163	66.4912	21.0667	7.27869e-60	0.136397	99.0654	99.0664	0.0321304
785	Astrocyte_progenitors	Mig_Layer_2-4_ExN	SLIT2	ROBO1	1.83572e-06	0	SLIT2_ROBO1	SLIT2 - ROBO1	SLIT	Secreted Signaling	PMID:10102268	LS	0.611869	31.1012	12.4883	8.83961e-31	1.74409	75.0862	69.802	3.4992e-19
786	Interneuron_S2	Mig_Layer_2-4_ExN	SLIT2	ROBO1	1.36641e-05	0	SLIT2_ROBO1	SLIT2 - ROBO1	SLIT	Secreted Signaling	PMID:10102268	LS	3.67163	66.4912	21.0667	7.27869e-60	1.74409	75.0862	69.802	3.4992e-19
787	Astrocyte_progenitors	OPC_1	SLIT2	ROBO1	1.08867e-06	0	SLIT2_ROBO1	SLIT2 - ROBO1	SLIT	Secreted Signaling	PMID:10102268	LS	0.611869	31.1012	12.4883	8.83961e-31	0.259759	69.0167	64.2066	0.005385
788	Interneuron_S2	OPC_1	SLIT2	ROBO1	8.10346e-06	0	SLIT2_ROBO1	SLIT2 - ROBO1	SLIT	Secreted Signaling	PMID:10102268	LS	3.67163	66.4912	21.0667	7.27869e-60	0.259759	69.0167	64.2066	0.005385
789	Astrocyte_progenitors	Layer_4-5_ExN	SLIT2	ROBO1	1.14163e-05	0	SLIT2_ROBO1	SLIT2 - ROBO1	SLIT	Secreted Signaling	PMID:10102268	LS	0.611869	31.1012	12.4883	8.83961e-31	4.17058	93.4372	90.4277	8.32126e-17
790	Interneuron_S2	Layer_4-5_ExN	SLIT2	ROBO1	8.49713e-05	0	SLIT2_ROBO1	SLIT2 - ROBO1	SLIT	Secreted Signaling	PMID:10102268	LS	3.67163	66.4912	21.0667	7.27869e-60	4.17058	93.4372	90.4277	8.32126e-17
791	Astrocyte_progenitors	Interneuron_S1	SLIT2	ROBO1	2.18307e-06	0	SLIT2_ROBO1	SLIT2 - ROBO1	SLIT	Secreted Signaling	PMID:10102268	LS	0.611869	31.1012	12.4883	8.83961e-31	NA	NA	NA	NA
792	Interneuron_S2	Interneuron_S1	SLIT2	ROBO1	1.62495e-05	0	SLIT2_ROBO1	SLIT2 - ROBO1	SLIT	Secreted Signaling	PMID:10102268	LS	3.67163	66.4912	21.0667	7.27869e-60	NA	NA	NA	NA
793	Astrocyte_progenitors	vRG	SLIT2	ROBO1	7.39313e-07	0	SLIT2_ROBO1	SLIT2 - ROBO1	SLIT	Secreted Signaling	PMID:10102268	LS	0.611869	31.1012	12.4883	8.83961e-31	-0.348813	61.4372	63.7967	0.035588
794	Interneuron_S2	vRG	SLIT2	ROBO1	5.50308e-06	0	SLIT2_ROBO1	SLIT2 - ROBO1	SLIT	Secreted Signaling	PMID:10102268	LS	3.67163	66.4912	21.0667	7.27869e-60	-0.348813	61.4372	63.7967	0.035588
795	Astrocyte_progenitors	Cycling_progenitors	SLIT2	ROBO1	1.59379e-06	0	SLIT2_ROBO1	SLIT2 - ROBO1	SLIT	Secreted Signaling	PMID:10102268	LS	0.611869	31.1012	12.4883	8.83961e-31	0.277098	77.9124	64.5556	3.64892e-11
796	Interneuron_S2	Cycling_progenitors	SLIT2	ROBO1	1.18633e-05	0	SLIT2_ROBO1	SLIT2 - ROBO1	SLIT	Secreted Signaling	PMID:10102268	LS	3.67163	66.4912	21.0667	7.27869e-60	0.277098	77.9124	64.5556	3.64892e-11
797	Astrocyte_progenitors	Layer_2-4_ExN	SLIT2	ROBO1	1.41546e-06	0	SLIT2_ROBO1	SLIT2 - ROBO1	SLIT	Secreted Signaling	PMID:10102268	LS	0.611869	31.1012	12.4883	8.83961e-31	-8.2465	59.7853	73.913	3.36627e-137
798	Interneuron_S2	Layer_2-4_ExN	SLIT2	ROBO1	1.0536e-05	0	SLIT2_ROBO1	SLIT2 - ROBO1	SLIT	Secreted Signaling	PMID:10102268	LS	3.67163	66.4912	21.0667	7.27869e-60	-8.2465	59.7853	73.913	3.36627e-137
799	Astrocyte_progenitors	Interneuron_4	SLIT2	ROBO1	1.02884e-05	0	SLIT2_ROBO1	SLIT2 - ROBO1	SLIT	Secreted Signaling	PMID:10102268	LS	0.611869	31.1012	12.4883	8.83961e-31	3.6977	92.437	83.5616	0.00283634
800	Interneuron_S2	Interneuron_4	SLIT2	ROBO1	7.65772e-05	0	SLIT2_ROBO1	SLIT2 - ROBO1	SLIT	Secreted Signaling	PMID:10102268	LS	3.67163	66.4912	21.0667	7.27869e-60	3.6977	92.437	83.5616	0.00283634
801	Astrocyte_progenitors	Astrocyte_progenitors	SLIT2	ROBO1	1.65693e-06	0	SLIT2_ROBO1	SLIT2 - ROBO1	SLIT	Secreted Signaling	PMID:10102268	LS	0.611869	31.1012	12.4883	8.83961e-31	0.91619	72.9167	67.23	2.26083e-12
802	Interneuron_S2	Astrocyte_progenitors	SLIT2	ROBO1	1.23333e-05	0	SLIT2_ROBO1	SLIT2 - ROBO1	SLIT	Secreted Signaling	PMID:10102268	LS	3.67163	66.4912	21.0667	7.27869e-60	0.91619	72.9167	67.23	2.26083e-12
803	Astrocyte_progenitors	Smooth_muscle_2	SLIT2	ROBO1	1.4432e-07	0	SLIT2_ROBO1	SLIT2 - ROBO1	SLIT	Secreted Signaling	PMID:10102268	LS	0.611869	31.1012	12.4883	8.83961e-31	NA	NA	NA	NA
804	Interneuron_S2	Smooth_muscle_2	SLIT2	ROBO1	1.07425e-06	0	SLIT2_ROBO1	SLIT2 - ROBO1	SLIT	Secreted Signaling	PMID:10102268	LS	3.67163	66.4912	21.0667	7.27869e-60	NA	NA	NA	NA
805	Astrocyte_progenitors	Microglia_1	SLIT2	ROBO1	1.70117e-07	0	SLIT2_ROBO1	SLIT2 - ROBO1	SLIT	Secreted Signaling	PMID:10102268	LS	0.611869	31.1012	12.4883	8.83961e-31	NA	NA	NA	NA
806	Interneuron_S2	Microglia_1	SLIT2	ROBO1	1.26627e-06	0	SLIT2_ROBO1	SLIT2 - ROBO1	SLIT	Secreted Signaling	PMID:10102268	LS	3.67163	66.4912	21.0667	7.27869e-60	NA	NA	NA	NA
807	Astrocyte_progenitors	Smooth_muscle_1	SLIT2	ROBO1	6.87577e-07	0	SLIT2_ROBO1	SLIT2 - ROBO1	SLIT	Secreted Signaling	PMID:10102268	LS	0.611869	31.1012	12.4883	8.83961e-31	NA	NA	NA	NA
808	Interneuron_S2	Smooth_muscle_1	SLIT2	ROBO1	5.11798e-06	0	SLIT2_ROBO1	SLIT2 - ROBO1	SLIT	Secreted Signaling	PMID:10102268	LS	3.67163	66.4912	21.0667	7.27869e-60	NA	NA	NA	NA
809	Astrocyte_progenitors	Interneuron_S2	SLIT2	ROBO1	2.08431e-05	0	SLIT2_ROBO1	SLIT2 - ROBO1	SLIT	Secreted Signaling	PMID:10102268	LS	0.611869	31.1012	12.4883	8.83961e-31	24.3064	94.2982	66.6667	3.68033e-90
810	Interneuron_S2	Interneuron_S2	SLIT2	ROBO1	0.000155125	0	SLIT2_ROBO1	SLIT2 - ROBO1	SLIT	Secreted Signaling	PMID:10102268	LS	3.67163	66.4912	21.0667	7.27869e-60	24.3064	94.2982	66.6667	3.68033e-90
811	Astrocyte_progenitors	OL	SLIT2	ROBO1	4.31457e-07	0	SLIT2_ROBO1	SLIT2 - ROBO1	SLIT	Secreted Signaling	PMID:10102268	LS	0.611869	31.1012	12.4883	8.83961e-31	0.339441	51.2821	36.3636	0.0250701
812	Interneuron_S2	OL	SLIT2	ROBO1	3.21156e-06	0	SLIT2_ROBO1	SLIT2 - ROBO1	SLIT	Secreted Signaling	PMID:10102268	LS	3.67163	66.4912	21.0667	7.27869e-60	0.339441	51.2821	36.3636	0.0250701
813	Astrocyte_progenitors	Layer_4-6_ExN	SLIT2	ROBO2	3.90009e-05	0	SLIT2_ROBO2	SLIT2 - ROBO2	SLIT	Secreted Signaling	PMID:10102268	LS	0.611869	31.1012	12.4883	8.83961e-31	4.91181	99.3883	98.1992	6.89208e-19
814	Interneuron_S2	Layer_4-6_ExN	SLIT2	ROBO2	0.000290231	0	SLIT2_ROBO2	SLIT2 - ROBO2	SLIT	Secreted Signaling	PMID:10102268	LS	3.67163	66.4912	21.0667	7.27869e-60	4.91181	99.3883	98.1992	6.89208e-19
815	Astrocyte_progenitors	oRG	SLIT2	ROBO2	3.27677e-06	0	SLIT2_ROBO2	SLIT2 - ROBO2	SLIT	Secreted Signaling	PMID:10102268	LS	0.611869	31.1012	12.4883	8.83961e-31	NA	NA	NA	NA
816	Interneuron_S2	oRG	SLIT2	ROBO2	2.43902e-05	0	SLIT2_ROBO2	SLIT2 - ROBO2	SLIT	Secreted Signaling	PMID:10102268	LS	3.67163	66.4912	21.0667	7.27869e-60	NA	NA	NA	NA
817	Astrocyte_progenitors	IP	SLIT2	ROBO2	8.97583e-06	0	SLIT2_ROBO2	SLIT2 - ROBO2	SLIT	Secreted Signaling	PMID:10102268	LS	0.611869	31.1012	12.4883	8.83961e-31	0.302744	97.681	89.7136	6.02919e-26
818	Interneuron_S2	IP	SLIT2	ROBO2	6.6808e-05	0	SLIT2_ROBO2	SLIT2 - ROBO2	SLIT	Secreted Signaling	PMID:10102268	LS	3.67163	66.4912	21.0667	7.27869e-60	0.302744	97.681	89.7136	6.02919e-26
819	Astrocyte_progenitors	Interneuron_1	SLIT2	ROBO2	2.28569e-06	0	SLIT2_ROBO2	SLIT2 - ROBO2	SLIT	Secreted Signaling	PMID:10102268	LS	0.611869	31.1012	12.4883	8.83961e-31	-0.14777	84.4789	86.5443	0.00363144
820	Interneuron_S2	Interneuron_1	SLIT2	ROBO2	1.70133e-05	0	SLIT2_ROBO2	SLIT2 - ROBO2	SLIT	Secreted Signaling	PMID:10102268	LS	3.67163	66.4912	21.0667	7.27869e-60	-0.14777	84.4789	86.5443	0.00363144
821	Astrocyte_progenitors	Mig_Layer_2-3_ExN	SLIT2	ROBO2	7.93947e-06	0	SLIT2_ROBO2	SLIT2 - ROBO2	SLIT	Secreted Signaling	PMID:10102268	LS	0.611869	31.1012	12.4883	8.83961e-31	-1.56222	96.8454	96.2099	7.25266e-48
822	Interneuron_S2	Mig_Layer_2-3_ExN	SLIT2	ROBO2	5.90946e-05	0	SLIT2_ROBO2	SLIT2 - ROBO2	SLIT	Secreted Signaling	PMID:10102268	LS	3.67163	66.4912	21.0667	7.27869e-60	-1.56222	96.8454	96.2099	7.25266e-48
823	Astrocyte_progenitors	Interneuron_2	SLIT2	ROBO2	2.99616e-06	0	SLIT2_ROBO2	SLIT2 - ROBO2	SLIT	Secreted Signaling	PMID:10102268	LS	0.611869	31.1012	12.4883	8.83961e-31	-0.449633	88.1136	90.7579	7.40149e-19
824	Interneuron_S2	Interneuron_2	SLIT2	ROBO2	2.23016e-05	0	SLIT2_ROBO2	SLIT2 - ROBO2	SLIT	Secreted Signaling	PMID:10102268	LS	3.67163	66.4912	21.0667	7.27869e-60	-0.449633	88.1136	90.7579	7.40149e-19
825	Astrocyte_progenitors	Interneuron_M2	SLIT2	ROBO2	1.37644e-05	0	SLIT2_ROBO2	SLIT2 - ROBO2	SLIT	Secreted Signaling	PMID:10102268	LS	0.611869	31.1012	12.4883	8.83961e-31	13.4905	97.0833	86.1314	1.56688e-99
826	Interneuron_S2	Interneuron_M2	SLIT2	ROBO2	0.000102447	0	SLIT2_ROBO2	SLIT2 - ROBO2	SLIT	Secreted Signaling	PMID:10102268	LS	3.67163	66.4912	21.0667	7.27869e-60	13.4905	97.0833	86.1314	1.56688e-99
827	Astrocyte_progenitors	IP_IN	SLIT2	ROBO2	7.02859e-06	0	SLIT2_ROBO2	SLIT2 - ROBO2	SLIT	Secreted Signaling	PMID:10102268	LS	0.611869	31.1012	12.4883	8.83961e-31	3.76491	98.7805	92.042	3.96476e-18
828	Interneuron_S2	IP_IN	SLIT2	ROBO2	5.23152e-05	0	SLIT2_ROBO2	SLIT2 - ROBO2	SLIT	Secreted Signaling	PMID:10102268	LS	3.67163	66.4912	21.0667	7.27869e-60	3.76491	98.7805	92.042	3.96476e-18
829	Astrocyte_progenitors	Layer_5-6_ExN	SLIT2	ROBO2	3.91202e-05	0	SLIT2_ROBO2	SLIT2 - ROBO2	SLIT	Secreted Signaling	PMID:10102268	LS	0.611869	31.1012	12.4883	8.83961e-31	8.32555	99.908	99.4499	6.49161e-31
830	Interneuron_S2	Layer_5-6_ExN	SLIT2	ROBO2	0.000291119	0	SLIT2_ROBO2	SLIT2 - ROBO2	SLIT	Secreted Signaling	PMID:10102268	LS	3.67163	66.4912	21.0667	7.27869e-60	8.32555	99.908	99.4499	6.49161e-31
831	Astrocyte_progenitors	Interneuron_3	SLIT2	ROBO2	1.51803e-06	0	SLIT2_ROBO2	SLIT2 - ROBO2	SLIT	Secreted Signaling	PMID:10102268	LS	0.611869	31.1012	12.4883	8.83961e-31	NA	NA	NA	NA
832	Interneuron_S2	Interneuron_3	SLIT2	ROBO2	1.12994e-05	0	SLIT2_ROBO2	SLIT2 - ROBO2	SLIT	Secreted Signaling	PMID:10102268	LS	3.67163	66.4912	21.0667	7.27869e-60	NA	NA	NA	NA
833	Astrocyte_progenitors	Interneuron_M1	SLIT2	ROBO2	2.60134e-05	0	SLIT2_ROBO2	SLIT2 - ROBO2	SLIT	Secreted Signaling	PMID:10102268	LS	0.611869	31.1012	12.4883	8.83961e-31	17.651	98.5981	95.9544	7.42746e-41
834	Interneuron_S2	Interneuron_M1	SLIT2	ROBO2	0.000193599	0	SLIT2_ROBO2	SLIT2 - ROBO2	SLIT	Secreted Signaling	PMID:10102268	LS	3.67163	66.4912	21.0667	7.27869e-60	17.651	98.5981	95.9544	7.42746e-41
835	Astrocyte_progenitors	Mig_Layer_2-4_ExN	SLIT2	ROBO2	7.28113e-06	0	SLIT2_ROBO2	SLIT2 - ROBO2	SLIT	Secreted Signaling	PMID:10102268	LS	0.611869	31.1012	12.4883	8.83961e-31	6.45424	84.7434	82.3432	3.73808e-35
836	Interneuron_S2	Mig_Layer_2-4_ExN	SLIT2	ROBO2	5.41948e-05	0	SLIT2_ROBO2	SLIT2 - ROBO2	SLIT	Secreted Signaling	PMID:10102268	LS	3.67163	66.4912	21.0667	7.27869e-60	6.45424	84.7434	82.3432	3.73808e-35
837	Astrocyte_progenitors	OPC_1	SLIT2	ROBO2	1.08059e-06	0	SLIT2_ROBO2	SLIT2 - ROBO2	SLIT	Secreted Signaling	PMID:10102268	LS	0.611869	31.1012	12.4883	8.83961e-31	-1.7534	67.718	68.2657	0.0219666
838	Interneuron_S2	OPC_1	SLIT2	ROBO2	8.04333e-06	0	SLIT2_ROBO2	SLIT2 - ROBO2	SLIT	Secreted Signaling	PMID:10102268	LS	3.67163	66.4912	21.0667	7.27869e-60	-1.7534	67.718	68.2657	0.0219666
839	Astrocyte_progenitors	Layer_4-5_ExN	SLIT2	ROBO2	4.39137e-05	0	SLIT2_ROBO2	SLIT2 - ROBO2	SLIT	Secreted Signaling	PMID:10102268	LS	0.611869	31.1012	12.4883	8.83961e-31	-29.1676	97.2929	96.1303	9.77593e-08
840	Interneuron_S2	Layer_4-5_ExN	SLIT2	ROBO2	0.000326781	0	SLIT2_ROBO2	SLIT2 - ROBO2	SLIT	Secreted Signaling	PMID:10102268	LS	3.67163	66.4912	21.0667	7.27869e-60	-29.1676	97.2929	96.1303	9.77593e-08
841	Astrocyte_progenitors	Interneuron_S1	SLIT2	ROBO2	3.08974e-06	0	SLIT2_ROBO2	SLIT2 - ROBO2	SLIT	Secreted Signaling	PMID:10102268	LS	0.611869	31.1012	12.4883	8.83961e-31	0.168728	88.9401	82.2757	0.0150511
842	Interneuron_S2	Interneuron_S1	SLIT2	ROBO2	2.29981e-05	0	SLIT2_ROBO2	SLIT2 - ROBO2	SLIT	Secreted Signaling	PMID:10102268	LS	3.67163	66.4912	21.0667	7.27869e-60	0.168728	88.9401	82.2757	0.0150511
843	Astrocyte_progenitors	vRG	SLIT2	ROBO2	4.24069e-06	0	SLIT2_ROBO2	SLIT2 - ROBO2	SLIT	Secreted Signaling	PMID:10102268	LS	0.611869	31.1012	12.4883	8.83961e-31	NA	NA	NA	NA
844	Interneuron_S2	vRG	SLIT2	ROBO2	3.15649e-05	0	SLIT2_ROBO2	SLIT2 - ROBO2	SLIT	Secreted Signaling	PMID:10102268	LS	3.67163	66.4912	21.0667	7.27869e-60	NA	NA	NA	NA
845	Astrocyte_progenitors	Cycling_progenitors	SLIT2	ROBO2	6.72291e-06	0	SLIT2_ROBO2	SLIT2 - ROBO2	SLIT	Secreted Signaling	PMID:10102268	LS	0.611869	31.1012	12.4883	8.83961e-31	1.02734	95.9925	89.5	3.19968e-14
846	Interneuron_S2	Cycling_progenitors	SLIT2	ROBO2	5.004e-05	0	SLIT2_ROBO2	SLIT2 - ROBO2	SLIT	Secreted Signaling	PMID:10102268	LS	3.67163	66.4912	21.0667	7.27869e-60	1.02734	95.9925	89.5	3.19968e-14
847	Astrocyte_progenitors	Layer_2-4_ExN	SLIT2	ROBO2	3.39826e-05	0	SLIT2_ROBO2	SLIT2 - ROBO2	SLIT	Secreted Signaling	PMID:10102268	LS	0.611869	31.1012	12.4883	8.83961e-31	7.90504	98.7328	97.3376	1.32247e-78
848	Interneuron_S2	Layer_2-4_ExN	SLIT2	ROBO2	0.000252895	0	SLIT2_ROBO2	SLIT2 - ROBO2	SLIT	Secreted Signaling	PMID:10102268	LS	3.67163	66.4912	21.0667	7.27869e-60	7.90504	98.7328	97.3376	1.32247e-78
849	Astrocyte_progenitors	Interneuron_4	SLIT2	ROBO2	3.62629e-06	0	SLIT2_ROBO2	SLIT2 - ROBO2	SLIT	Secreted Signaling	PMID:10102268	LS	0.611869	31.1012	12.4883	8.83961e-31	NA	NA	NA	NA
850	Interneuron_S2	Interneuron_4	SLIT2	ROBO2	2.69918e-05	0	SLIT2_ROBO2	SLIT2 - ROBO2	SLIT	Secreted Signaling	PMID:10102268	LS	3.67163	66.4912	21.0667	7.27869e-60	NA	NA	NA	NA
851	Astrocyte_progenitors	Astrocyte_progenitors	SLIT2	ROBO2	1.97469e-06	0	SLIT2_ROBO2	SLIT2 - ROBO2	SLIT	Secreted Signaling	PMID:10102268	LS	0.611869	31.1012	12.4883	8.83961e-31	0.57596	76.7113	80.939	9.90813e-05
852	Interneuron_S2	Astrocyte_progenitors	SLIT2	ROBO2	1.46985e-05	0	SLIT2_ROBO2	SLIT2 - ROBO2	SLIT	Secreted Signaling	PMID:10102268	LS	3.67163	66.4912	21.0667	7.27869e-60	0.57596	76.7113	80.939	9.90813e-05
853	Astrocyte_progenitors	Smooth_muscle_2	SLIT2	ROBO2	1.59935e-06	0	SLIT2_ROBO2	SLIT2 - ROBO2	SLIT	Secreted Signaling	PMID:10102268	LS	0.611869	31.1012	12.4883	8.83961e-31	NA	NA	NA	NA
854	Interneuron_S2	Smooth_muscle_2	SLIT2	ROBO2	1.19047e-05	0	SLIT2_ROBO2	SLIT2 - ROBO2	SLIT	Secreted Signaling	PMID:10102268	LS	3.67163	66.4912	21.0667	7.27869e-60	NA	NA	NA	NA
855	Astrocyte_progenitors	Microglia_1	SLIT2	ROBO2	6.59862e-07	0	SLIT2_ROBO2	SLIT2 - ROBO2	SLIT	Secreted Signaling	PMID:10102268	LS	0.611869	31.1012	12.4883	8.83961e-31	NA	NA	NA	NA
856	Interneuron_S2	Microglia_1	SLIT2	ROBO2	4.91168e-06	0	SLIT2_ROBO2	SLIT2 - ROBO2	SLIT	Secreted Signaling	PMID:10102268	LS	3.67163	66.4912	21.0667	7.27869e-60	NA	NA	NA	NA
857	Astrocyte_progenitors	Smooth_muscle_1	SLIT2	ROBO2	9.05631e-06	0	SLIT2_ROBO2	SLIT2 - ROBO2	SLIT	Secreted Signaling	PMID:10102268	LS	0.611869	31.1012	12.4883	8.83961e-31	NA	NA	NA	NA
858	Interneuron_S2	Smooth_muscle_1	SLIT2	ROBO2	6.7407e-05	0	SLIT2_ROBO2	SLIT2 - ROBO2	SLIT	Secreted Signaling	PMID:10102268	LS	3.67163	66.4912	21.0667	7.27869e-60	NA	NA	NA	NA
859	Astrocyte_progenitors	Interneuron_S2	SLIT2	ROBO2	1.0634e-05	0	SLIT2_ROBO2	SLIT2 - ROBO2	SLIT	Secreted Signaling	PMID:10102268	LS	0.611869	31.1012	12.4883	8.83961e-31	15.024	89.7368	56.8	5.31619e-62
860	Interneuron_S2	Interneuron_S2	SLIT2	ROBO2	7.91488e-05	0	SLIT2_ROBO2	SLIT2 - ROBO2	SLIT	Secreted Signaling	PMID:10102268	LS	3.67163	66.4912	21.0667	7.27869e-60	15.024	89.7368	56.8	5.31619e-62
861	Astrocyte_progenitors	OL	SLIT2	ROBO2	4.12652e-07	0	SLIT2_ROBO2	SLIT2 - ROBO2	SLIT	Secreted Signaling	PMID:10102268	LS	0.611869	31.1012	12.4883	8.83961e-31	0.736	56.4103	27.2727	0.000773986
862	Interneuron_S2	OL	SLIT2	ROBO2	3.07158e-06	0	SLIT2_ROBO2	SLIT2 - ROBO2	SLIT	Secreted Signaling	PMID:10102268	LS	3.67163	66.4912	21.0667	7.27869e-60	0.736	56.4103	27.2727	0.000773986
863	Interneuron_S2	Microglia_1	TUB	MERTK	3.13212e-06	0	TUB_MERTK	TUB - MERTK	TULP	Secreted Signaling	PMID: 20978475	LS	0.16993	33.0702	21.8667	1.22084e-06	NA	NA	NA	NA

## Sheet: Downregulated in DS
	source	target	ligand	receptor	prob	pval	interaction_name	interaction_name_2	pathway_name	annotation	evidence	datasets	ligand.logFC	ligand.pct.1	ligand.pct.2	ligand.pvalues	receptor.logFC	receptor.pct.1	receptor.pct.2	receptor.pvalues
1	Smooth_muscle_2	Microglia_1	TGFB1	TGFbR1_R2	1.59018e-06	0	TGFB1_TGFBR1_TGFBR2	TGFB1 - (TGFBR1+TGFBR2)	TGFb	Secreted Signaling	KEGG: hsa04350	NL	-1.36305	34.0278	58.2278	1.91757e-07	NA	NA	NA	NA
2	Smooth_muscle_2	Smooth_muscle_2	TGFB1	TGFbR1_R2	1.92902e-06	0	TGFB1_TGFBR1_TGFBR2	TGFB1 - (TGFBR1+TGFBR2)	TGFb	Secreted Signaling	KEGG: hsa04350	NL	-1.36305	34.0278	58.2278	1.91757e-07	-2.48856	71.5278	80.3797	2.2708e-06
3	Layer_2-4_ExN	Microglia_1	TGFB2	TGFbR1_R2	2.79609e-07	0	TGFB2_TGFBR1_TGFBR2	TGFB2 - (TGFBR1+TGFBR2)	TGFb	Secreted Signaling	KEGG: hsa04350	NL	-0.196906	21.1017	28.8715	3.39621e-23	NA	NA	NA	NA
4	Astrocyte_progenitors	Microglia_1	TGFB2	TGFbR1_R2	2.90195e-07	0	TGFB2_TGFBR1_TGFBR2	TGFB2 - (TGFBR1+TGFBR2)	TGFb	Secreted Signaling	KEGG: hsa04350	NL	-0.394592	38.5417	46.4789	0.000292892	NA	NA	NA	NA
5	Layer_2-4_ExN	Smooth_muscle_2	TGFB2	TGFbR1_R2	3.3919e-07	0	TGFB2_TGFBR1_TGFBR2	TGFB2 - (TGFBR1+TGFBR2)	TGFb	Secreted Signaling	KEGG: hsa04350	NL	-0.196906	21.1017	28.8715	3.39621e-23	-2.48856	71.5278	80.3797	2.2708e-06
6	Astrocyte_progenitors	Smooth_muscle_2	TGFB2	TGFbR1_R2	3.52031e-07	0	TGFB2_TGFBR1_TGFBR2	TGFB2 - (TGFBR1+TGFBR2)	TGFb	Secreted Signaling	KEGG: hsa04350	NL	-0.394592	38.5417	46.4789	0.000292892	-2.48856	71.5278	80.3797	2.2708e-06
7	Smooth_muscle_2	Smooth_muscle_2	TGFB1	ACVR1B_TGFbR2	1.67095e-06	0	TGFB1_ACVR1B_TGFBR2	TGFB1 - (ACVR1B+TGFBR2)	TGFb	Secreted Signaling	PMID: 27449815	NL	-1.36305	34.0278	58.2278	1.91757e-07	-1.36846	46.1806	58.2278	0.00139117
8	Layer_2-4_ExN	Smooth_muscle_2	TGFB2	ACVR1B_TGFbR2	2.93811e-07	0	TGFB2_ACVR1B_TGFBR2	TGFB2 - (ACVR1B+TGFBR2)	TGFb	Secreted Signaling	PMID: 27449815	NL	-0.196906	21.1017	28.8715	3.39621e-23	-1.36846	46.1806	58.2278	0.00139117
9	Astrocyte_progenitors	Smooth_muscle_2	TGFB2	ACVR1B_TGFbR2	3.04934e-07	0	TGFB2_ACVR1B_TGFBR2	TGFB2 - (ACVR1B+TGFBR2)	TGFb	Secreted Signaling	PMID: 27449815	NL	-0.394592	38.5417	46.4789	0.000292892	-1.36846	46.1806	58.2278	0.00139117
10	Smooth_muscle_2	Smooth_muscle_2	TGFB1	ACVR1_TGFbR	3.17483e-06	0	TGFB1_ACVR1_TGFBR1	TGFB1 - (ACVR1+TGFBR1)	TGFb	Secreted Signaling	PMID: 29376829	NL	-1.36305	34.0278	58.2278	1.91757e-07	-3.01766	67.3611	80.3797	1.13638e-06
11	Layer_2-4_ExN	Smooth_muscle_2	TGFB2	ACVR1_TGFbR	5.55505e-07	0	TGFB2_ACVR1_TGFBR1	TGFB2 - (ACVR1+TGFBR1)	TGFb	Secreted Signaling	PMID: 29376829	NL	-0.196906	21.1017	28.8715	3.39621e-23	-3.01766	67.3611	80.3797	1.13638e-06
12	Astrocyte_progenitors	Smooth_muscle_2	TGFB2	ACVR1_TGFbR	5.76762e-07	0	TGFB2_ACVR1_TGFBR1	TGFB2 - (ACVR1+TGFBR1)	TGFb	Secreted Signaling	PMID: 29376829	NL	-0.394592	38.5417	46.4789	0.000292892	-3.01766	67.3611	80.3797	1.13638e-06
13	Smooth_muscle_2	Layer_2-4_ExN	BMP6	ACVR1_ACVR2A	1.6806e-07	0	BMP6_ACVR1_ACVR2A	BMP6 - (ACVR1+ACVR2A)	BMP	Secreted Signaling	KEGG: hsa04350; PMID:26893264	NL	-1.12374	17.3611	44.9367	4.2043e-08	0.107161	40.4083	34.2941	2.42409e-10
14	Smooth_muscle_2	Smooth_muscle_2	BMP6	ACVR1_ACVR2A	6.31971e-07	0	BMP6_ACVR1_ACVR2A	BMP6 - (ACVR1+ACVR2A)	BMP	Secreted Signaling	KEGG: hsa04350; PMID:26893264	NL	-1.12374	17.3611	44.9367	4.2043e-08	-1.93618	46.1806	59.8101	0.0245882
15	Smooth_muscle_2	Layer_4-5_ExN	BMP6	ACVR1_ACVR2A	1.6438e-07	0	BMP6_ACVR1_ACVR2A	BMP6 - (ACVR1+ACVR2A)	BMP	Secreted Signaling	KEGG: hsa04350; PMID:26893264	NL	-1.12374	17.3611	44.9367	4.2043e-08	NA	NA	NA	NA
16	Smooth_muscle_2	Interneuron_S2	BMP6	ACVR1_ACVR2A	1.87119e-07	0	BMP6_ACVR1_ACVR2A	BMP6 - (ACVR1+ACVR2A)	BMP	Secreted Signaling	KEGG: hsa04350; PMID:26893264	NL	-1.12374	17.3611	44.9367	4.2043e-08	0.128736	58.4211	55.7333	3.77861e-05
17	Smooth_muscle_2	Smooth_muscle_2	BMP6	ACVR1_ACVR2B	5.36733e-07	0	BMP6_ACVR1_ACVR2B	BMP6 - (ACVR1+ACVR2B)	BMP	Secreted Signaling	KEGG: hsa04350; PMID:26893264	NL	-1.12374	17.3611	44.9367	4.2043e-08	-1.90136	38.8889	54.7468	0.000667055
18	Smooth_muscle_2	Layer_2-4_ExN	BMP6	ACVR1_BMPR2	5.73482e-07	0	BMP6_ACVR1_BMPR2	BMP6 - (ACVR1+BMPR2)	BMP	Secreted Signaling	KEGG: hsa04350; PMID:26893264	NL	-1.12374	17.3611	44.9367	4.2043e-08	-0.168224	64.6779	61.1138	1.31663e-10
19	Smooth_muscle_2	oRG	BMP6	ACVR1_BMPR2	3.27604e-07	0	BMP6_ACVR1_BMPR2	BMP6 - (ACVR1+BMPR2)	BMP	Secreted Signaling	KEGG: hsa04350; PMID:26893264	NL	-1.12374	17.3611	44.9367	4.2043e-08	NA	NA	NA	NA
20	Smooth_muscle_2	Interneuron_3	BMP6	ACVR1_BMPR2	3.55834e-07	0	BMP6_ACVR1_BMPR2	BMP6 - (ACVR1+BMPR2)	BMP	Secreted Signaling	KEGG: hsa04350; PMID:26893264	NL	-1.12374	17.3611	44.9367	4.2043e-08	-0.214859	36.2733	42.2847	1.40971e-05
21	Smooth_muscle_2	Smooth_muscle_2	BMP6	ACVR1_BMPR2	4.38796e-06	0	BMP6_ACVR1_BMPR2	BMP6 - (ACVR1+BMPR2)	BMP	Secreted Signaling	KEGG: hsa04350; PMID:26893264	NL	-1.12374	17.3611	44.9367	4.2043e-08	-4.69856	75	84.8101	4.98317e-05
22	Smooth_muscle_2	Smooth_muscle_1	BMP6	ACVR1_BMPR2	3.9843e-07	0	BMP6_ACVR1_BMPR2	BMP6 - (ACVR1+BMPR2)	BMP	Secreted Signaling	KEGG: hsa04350; PMID:26893264	NL	-1.12374	17.3611	44.9367	4.2043e-08	-0.390607	15.1261	41.8605	0.000155735
23	Smooth_muscle_2	Layer_4-5_ExN	BMP6	ACVR1_BMPR2	6.55698e-07	0	BMP6_ACVR1_BMPR2	BMP6 - (ACVR1+BMPR2)	BMP	Secreted Signaling	KEGG: hsa04350; PMID:26893264	NL	-1.12374	17.3611	44.9367	4.2043e-08	-0.914366	90.7301	92.8717	0.00209822
24	Smooth_muscle_2	Interneuron_S2	BMP6	ACVR1_BMPR2	2.86771e-07	0	BMP6_ACVR1_BMPR2	BMP6 - (ACVR1+BMPR2)	BMP	Secreted Signaling	KEGG: hsa04350; PMID:26893264	NL	-1.12374	17.3611	44.9367	4.2043e-08	1.42153	91.3158	83.2	9.25744e-23
25	Smooth_muscle_2	Layer_2-4_ExN	BMP6	BMPR1A_ACVR2A	1.68307e-07	0	BMP6_BMPR1A_ACVR2A	BMP6 - (BMPR1A+ACVR2A)	BMP	Secreted Signaling	KEGG: hsa04350; PMID:26893264	NL	-1.12374	17.3611	44.9367	4.2043e-08	NA	NA	NA	NA
26	Smooth_muscle_2	Mig_Layer_2-4_ExN	BMP6	BMPR1A_ACVR2A	3.28977e-07	0	BMP6_BMPR1A_ACVR2A	BMP6 - (BMPR1A+ACVR2A)	BMP	Secreted Signaling	KEGG: hsa04350; PMID:26893264	NL	-1.12374	17.3611	44.9367	4.2043e-08	NA	NA	NA	NA
27	Smooth_muscle_2	IP	BMP6	BMPR1A_ACVR2A	1.74576e-07	0	BMP6_BMPR1A_ACVR2A	BMP6 - (BMPR1A+ACVR2A)	BMP	Secreted Signaling	KEGG: hsa04350; PMID:26893264	NL	-1.12374	17.3611	44.9367	4.2043e-08	-0.0607339	31.7331	33.6061	0.000425592
28	Smooth_muscle_2	Cycling_progenitors	BMP6	BMPR1A_ACVR2A	2.82971e-07	0	BMP6_BMPR1A_ACVR2A	BMP6 - (BMPR1A+ACVR2A)	BMP	Secreted Signaling	KEGG: hsa04350; PMID:26893264	NL	-1.12374	17.3611	44.9367	4.2043e-08	NA	NA	NA	NA
29	Smooth_muscle_2	Layer_4-6_ExN	BMP6	BMPR1A_ACVR2A	3.14762e-07	0	BMP6_BMPR1A_ACVR2A	BMP6 - (BMPR1A+ACVR2A)	BMP	Secreted Signaling	KEGG: hsa04350; PMID:26893264	NL	-1.12374	17.3611	44.9367	4.2043e-08	0.0980393	36.8351	29.7317	1.12169e-08
30	Smooth_muscle_2	Layer_5-6_ExN	BMP6	BMPR1A_ACVR2A	3.07526e-07	0	BMP6_BMPR1A_ACVR2A	BMP6 - (BMPR1A+ACVR2A)	BMP	Secreted Signaling	KEGG: hsa04350; PMID:26893264	NL	-1.12374	17.3611	44.9367	4.2043e-08	0.100601	40.6748	35.8269	1.19142e-05
31	Smooth_muscle_2	Smooth_muscle_2	BMP6	BMPR1A_ACVR2A	1.15888e-07	0	BMP6_BMPR1A_ACVR2A	BMP6 - (BMPR1A+ACVR2A)	BMP	Secreted Signaling	KEGG: hsa04350; PMID:26893264	NL	-1.12374	17.3611	44.9367	4.2043e-08	-0.3256	29.1667	39.2405	0.0491764
32	Smooth_muscle_2	OPC_1	BMP6	BMPR1A_ACVR2A	2.92002e-07	0	BMP6_BMPR1A_ACVR2A	BMP6 - (BMPR1A+ACVR2A)	BMP	Secreted Signaling	KEGG: hsa04350; PMID:26893264	NL	-1.12374	17.3611	44.9367	4.2043e-08	NA	NA	NA	NA
33	Smooth_muscle_2	OL	BMP6	BMPR1A_ACVR2A	1.34725e-07	0	BMP6_BMPR1A_ACVR2A	BMP6 - (BMPR1A+ACVR2A)	BMP	Secreted Signaling	KEGG: hsa04350; PMID:26893264	NL	-1.12374	17.3611	44.9367	4.2043e-08	NA	NA	NA	NA
34	Smooth_muscle_2	Interneuron_4	BMP6	BMPR1A_ACVR2A	1.59467e-07	0	BMP6_BMPR1A_ACVR2A	BMP6 - (BMPR1A+ACVR2A)	BMP	Secreted Signaling	KEGG: hsa04350; PMID:26893264	NL	-1.12374	17.3611	44.9367	4.2043e-08	0.179141	45.3782	31.5068	0.0397691
35	Smooth_muscle_2	Layer_4-5_ExN	BMP6	BMPR1A_ACVR2A	3.37385e-07	0	BMP6_BMPR1A_ACVR2A	BMP6 - (BMPR1A+ACVR2A)	BMP	Secreted Signaling	KEGG: hsa04350; PMID:26893264	NL	-1.12374	17.3611	44.9367	4.2043e-08	NA	NA	NA	NA
36	Smooth_muscle_2	Interneuron_M2	BMP6	BMPR1A_ACVR2A	1.56511e-07	0	BMP6_BMPR1A_ACVR2A	BMP6 - (BMPR1A+ACVR2A)	BMP	Secreted Signaling	KEGG: hsa04350; PMID:26893264	NL	-1.12374	17.3611	44.9367	4.2043e-08	-0.0342355	31.7361	31.4477	0.00349245
37	Smooth_muscle_2	Interneuron_M1	BMP6	BMPR1A_ACVR2A	3.10388e-07	0	BMP6_BMPR1A_ACVR2A	BMP6 - (BMPR1A+ACVR2A)	BMP	Secreted Signaling	KEGG: hsa04350; PMID:26893264	NL	-1.12374	17.3611	44.9367	4.2043e-08	0.156635	49.7664	46.2656	4.34594e-06
38	Smooth_muscle_2	Interneuron_S2	BMP6	BMPR1A_ACVR2A	3.18444e-07	0	BMP6_BMPR1A_ACVR2A	BMP6 - (BMPR1A+ACVR2A)	BMP	Secreted Signaling	KEGG: hsa04350; PMID:26893264	NL	-1.12374	17.3611	44.9367	4.2043e-08	0.2591	58.8596	51.4667	1.8893e-05
39	Smooth_muscle_2	Smooth_muscle_2	BMP6	BMPR1A_ACVR2B	9.84234e-08	0	BMP6_BMPR1A_ACVR2B	BMP6 - (BMPR1A+ACVR2B)	BMP	Secreted Signaling	KEGG: hsa04350; PMID:26893264	NL	-1.12374	17.3611	44.9367	4.2043e-08	-0.255958	14.5833	29.1139	0.00133411
40	Smooth_muscle_2	Mig_Layer_2-3_ExN	BMP6	BMPR1A_BMPR2	3.52433e-07	0	BMP6_BMPR1A_BMPR2	BMP6 - (BMPR1A+BMPR2)	BMP	Secreted Signaling	KEGG: hsa04350; PMID:26893264	NL	-1.12374	17.3611	44.9367	4.2043e-08	-0.102187	73.6973	73.6329	1.39706e-12
41	Smooth_muscle_2	Layer_2-4_ExN	BMP6	BMPR1A_BMPR2	5.74326e-07	0	BMP6_BMPR1A_BMPR2	BMP6 - (BMPR1A+BMPR2)	BMP	Secreted Signaling	KEGG: hsa04350; PMID:26893264	NL	-1.12374	17.3611	44.9367	4.2043e-08	-0.443609	88.9476	87.9336	2.09167e-11
42	Smooth_muscle_2	Astrocyte_progenitors	BMP6	BMPR1A_BMPR2	8.9527e-07	0	BMP6_BMPR1A_BMPR2	BMP6 - (BMPR1A+BMPR2)	BMP	Secreted Signaling	KEGG: hsa04350; PMID:26893264	NL	-1.12374	17.3611	44.9367	4.2043e-08	NA	NA	NA	NA
43	Smooth_muscle_2	Interneuron_2	BMP6	BMPR1A_BMPR2	3.47433e-07	0	BMP6_BMPR1A_BMPR2	BMP6 - (BMPR1A+BMPR2)	BMP	Secreted Signaling	KEGG: hsa04350; PMID:26893264	NL	-1.12374	17.3611	44.9367	4.2043e-08	0.0524105	39.461	36.2107	0.0101563
44	Smooth_muscle_2	Mig_Layer_2-4_ExN	BMP6	BMPR1A_BMPR2	1.01801e-06	0	BMP6_BMPR1A_BMPR2	BMP6 - (BMPR1A+BMPR2)	BMP	Secreted Signaling	KEGG: hsa04350; PMID:26893264	NL	-1.12374	17.3611	44.9367	4.2043e-08	NA	NA	NA	NA
45	Smooth_muscle_2	IP	BMP6	BMPR1A_BMPR2	3.49181e-07	0	BMP6_BMPR1A_BMPR2	BMP6 - (BMPR1A+BMPR2)	BMP	Secreted Signaling	KEGG: hsa04350; PMID:26893264	NL	-1.12374	17.3611	44.9367	4.2043e-08	-0.0628088	67.0057	65.5611	0.0296728
46	Smooth_muscle_2	oRG	BMP6	BMPR1A_BMPR2	3.45809e-07	0	BMP6_BMPR1A_BMPR2	BMP6 - (BMPR1A+BMPR2)	BMP	Secreted Signaling	KEGG: hsa04350; PMID:26893264	NL	-1.12374	17.3611	44.9367	4.2043e-08	NA	NA	NA	NA
47	Smooth_muscle_2	vRG	BMP6	BMPR1A_BMPR2	4.19574e-07	0	BMP6_BMPR1A_BMPR2	BMP6 - (BMPR1A+BMPR2)	BMP	Secreted Signaling	KEGG: hsa04350; PMID:26893264	NL	-1.12374	17.3611	44.9367	4.2043e-08	-0.288895	72.3684	76.556	0.00201472
48	Smooth_muscle_2	Interneuron_1	BMP6	BMPR1A_BMPR2	3.38629e-07	0	BMP6_BMPR1A_BMPR2	BMP6 - (BMPR1A+BMPR2)	BMP	Secreted Signaling	KEGG: hsa04350; PMID:26893264	NL	-1.12374	17.3611	44.9367	4.2043e-08	-0.0859121	24.3902	28.9585	0.00208465
49	Smooth_muscle_2	Cycling_progenitors	BMP6	BMPR1A_BMPR2	7.69464e-07	0	BMP6_BMPR1A_BMPR2	BMP6 - (BMPR1A+BMPR2)	BMP	Secreted Signaling	KEGG: hsa04350; PMID:26893264	NL	-1.12374	17.3611	44.9367	4.2043e-08	NA	NA	NA	NA
50	Smooth_muscle_2	Layer_4-6_ExN	BMP6	BMPR1A_BMPR2	9.93247e-07	0	BMP6_BMPR1A_BMPR2	BMP6 - (BMPR1A+BMPR2)	BMP	Secreted Signaling	KEGG: hsa04350; PMID:26893264	NL	-1.12374	17.3611	44.9367	4.2043e-08	NA	NA	NA	NA
51	Smooth_muscle_2	Interneuron_3	BMP6	BMPR1A_BMPR2	3.39117e-07	0	BMP6_BMPR1A_BMPR2	BMP6 - (BMPR1A+BMPR2)	BMP	Secreted Signaling	KEGG: hsa04350; PMID:26893264	NL	-1.12374	17.3611	44.9367	4.2043e-08	NA	NA	NA	NA
52	Smooth_muscle_2	Microglia_1	BMP6	BMPR1A_BMPR2	3.35831e-07	0	BMP6_BMPR1A_BMPR2	BMP6 - (BMPR1A+BMPR2)	BMP	Secreted Signaling	KEGG: hsa04350; PMID:26893264	NL	-1.12374	17.3611	44.9367	4.2043e-08	NA	NA	NA	NA
53	Smooth_muscle_2	Layer_5-6_ExN	BMP6	BMPR1A_BMPR2	9.31068e-07	0	BMP6_BMPR1A_BMPR2	BMP6 - (BMPR1A+BMPR2)	BMP	Secreted Signaling	KEGG: hsa04350; PMID:26893264	NL	-1.12374	17.3611	44.9367	4.2043e-08	-0.442913	81.135	83.4983	7.36289e-10
54	Smooth_muscle_2	Smooth_muscle_2	BMP6	BMPR1A_BMPR2	8.04645e-07	0	BMP6_BMPR1A_BMPR2	BMP6 - (BMPR1A+BMPR2)	BMP	Secreted Signaling	KEGG: hsa04350; PMID:26893264	NL	-1.12374	17.3611	44.9367	4.2043e-08	-5.85036	86.8056	89.2405	9.96614e-05
55	Smooth_muscle_2	OPC_1	BMP6	BMPR1A_BMPR2	5.84087e-07	0	BMP6_BMPR1A_BMPR2	BMP6 - (BMPR1A+BMPR2)	BMP	Secreted Signaling	KEGG: hsa04350; PMID:26893264	NL	-1.12374	17.3611	44.9367	4.2043e-08	NA	NA	NA	NA
56	Smooth_muscle_2	OL	BMP6	BMPR1A_BMPR2	3.03832e-07	0	BMP6_BMPR1A_BMPR2	BMP6 - (BMPR1A+BMPR2)	BMP	Secreted Signaling	KEGG: hsa04350; PMID:26893264	NL	-1.12374	17.3611	44.9367	4.2043e-08	NA	NA	NA	NA
57	Smooth_muscle_2	Interneuron_4	BMP6	BMPR1A_BMPR2	3.55583e-07	0	BMP6_BMPR1A_BMPR2	BMP6 - (BMPR1A+BMPR2)	BMP	Secreted Signaling	KEGG: hsa04350; PMID:26893264	NL	-1.12374	17.3611	44.9367	4.2043e-08	0.293078	63.4454	50.6849	0.0406838
58	Smooth_muscle_2	IP_IN	BMP6	BMPR1A_BMPR2	3.44773e-07	0	BMP6_BMPR1A_BMPR2	BMP6 - (BMPR1A+BMPR2)	BMP	Secreted Signaling	KEGG: hsa04350; PMID:26893264	NL	-1.12374	17.3611	44.9367	4.2043e-08	NA	NA	NA	NA
59	Smooth_muscle_2	Smooth_muscle_1	BMP6	BMPR1A_BMPR2	3.97443e-07	0	BMP6_BMPR1A_BMPR2	BMP6 - (BMPR1A+BMPR2)	BMP	Secreted Signaling	KEGG: hsa04350; PMID:26893264	NL	-1.12374	17.3611	44.9367	4.2043e-08	NA	NA	NA	NA
60	Smooth_muscle_2	Layer_4-5_ExN	BMP6	BMPR1A_BMPR2	1.3458e-06	0	BMP6_BMPR1A_BMPR2	BMP6 - (BMPR1A+BMPR2)	BMP	Secreted Signaling	KEGG: hsa04350; PMID:26893264	NL	-1.12374	17.3611	44.9367	4.2043e-08	-0.914366	90.7301	92.8717	0.00209822
61	Smooth_muscle_2	Interneuron_M2	BMP6	BMPR1A_BMPR2	3.19857e-07	0	BMP6_BMPR1A_BMPR2	BMP6 - (BMPR1A+BMPR2)	BMP	Secreted Signaling	KEGG: hsa04350; PMID:26893264	NL	-1.12374	17.3611	44.9367	4.2043e-08	0.119831	56.1806	50	0.000868582
62	Smooth_muscle_2	Interneuron_S1	BMP6	BMPR1A_BMPR2	3.39308e-07	0	BMP6_BMPR1A_BMPR2	BMP6 - (BMPR1A+BMPR2)	BMP	Secreted Signaling	KEGG: hsa04350; PMID:26893264	NL	-1.12374	17.3611	44.9367	4.2043e-08	NA	NA	NA	NA
63	Smooth_muscle_2	Interneuron_M1	BMP6	BMPR1A_BMPR2	4.46306e-07	0	BMP6_BMPR1A_BMPR2	BMP6 - (BMPR1A+BMPR2)	BMP	Secreted Signaling	KEGG: hsa04350; PMID:26893264	NL	-1.12374	17.3611	44.9367	4.2043e-08	0.156635	49.7664	46.2656	4.34594e-06
64	Smooth_muscle_2	Interneuron_S2	BMP6	BMPR1A_BMPR2	4.88035e-07	0	BMP6_BMPR1A_BMPR2	BMP6 - (BMPR1A+BMPR2)	BMP	Secreted Signaling	KEGG: hsa04350; PMID:26893264	NL	-1.12374	17.3611	44.9367	4.2043e-08	0.905495	75.307	65.2	9.39913e-13
65	Smooth_muscle_2	Astrocyte_progenitors	BMP6	BMPR1B_BMPR2	1.47025e-06	0	BMP6_BMPR1B_BMPR2	BMP6 - (BMPR1B+BMPR2)	BMP	Secreted Signaling	KEGG: hsa04350; PMID:26893264	NL	-1.12374	17.3611	44.9367	4.2043e-08	-1.61559	67.0387	79.6244	4.65447e-26
66	Smooth_muscle_2	oRG	BMP6	BMPR1B_BMPR2	3.56755e-07	0	BMP6_BMPR1B_BMPR2	BMP6 - (BMPR1B+BMPR2)	BMP	Secreted Signaling	KEGG: hsa04350; PMID:26893264	NL	-1.12374	17.3611	44.9367	4.2043e-08	-0.0849975	37.2476	38.0875	0.000432137
67	Smooth_muscle_2	vRG	BMP6	BMPR1B_BMPR2	4.31295e-07	0	BMP6_BMPR1B_BMPR2	BMP6 - (BMPR1B+BMPR2)	BMP	Secreted Signaling	KEGG: hsa04350; PMID:26893264	NL	-1.12374	17.3611	44.9367	4.2043e-08	-0.288895	72.3684	76.556	0.00201472
68	Astrocyte_progenitors	Astrocyte_progenitors	WNT3	FZD3_LRP5	1.34706e-07	0	WNT3_FZD3_LRP5	WNT3 - (FZD3+LRP5)	WNT	Secreted Signaling	KEGG: hsa04310; PMID: 23209147	NL	-0.362713	3.34821	28.7324	1.42686e-71	NA	NA	NA	NA
69	Astrocyte_progenitors	Smooth_muscle_2	WNT3	FZD3_LRP5	1.1171e-07	0	WNT3_FZD3_LRP5	WNT3 - (FZD3+LRP5)	WNT	Secreted Signaling	KEGG: hsa04310; PMID: 23209147	NL	-0.362713	3.34821	28.7324	1.42686e-71	-0.993937	38.1944	63.2911	4.12552e-07
70	Astrocyte_progenitors	OPC_1	WNT3	FZD3_LRP5	7.07085e-08	0	WNT3_FZD3_LRP5	WNT3 - (FZD3+LRP5)	WNT	Secreted Signaling	KEGG: hsa04310; PMID: 23209147	NL	-0.362713	3.34821	28.7324	1.42686e-71	-0.148184	28.0148	38.7454	0.0145326
71	Astrocyte_progenitors	Smooth_muscle_2	WNT3	FZD4_LRP5	4.06387e-07	0	WNT3_FZD4_LRP5	WNT3 - (FZD4+LRP5)	WNT	Secreted Signaling	KEGG: hsa04310; PMID: 23209147	NL	-0.362713	3.34821	28.7324	1.42686e-71	-1.12531	33.6806	63.6076	2.06278e-07
72	Astrocyte_progenitors	Smooth_muscle_2	WNT3	FZD6_LRP5	3.78847e-07	0	WNT3_FZD6_LRP5	WNT3 - (FZD6+LRP5)	WNT	Secreted Signaling	KEGG: hsa04310; PMID: 23209147	NL	-0.362713	3.34821	28.7324	1.42686e-71	-0.840067	32.9861	58.8608	3.94768e-07
73	Astrocyte_progenitors	Mig_Layer_2-3_ExN	WNT3	FZD3_LRP6	8.18071e-08	0	WNT3_FZD3_LRP6	WNT3 - (FZD3+LRP6)	WNT	Secreted Signaling	KEGG: hsa04310; PMID: 23209147	NL	-0.362713	3.34821	28.7324	1.42686e-71	NA	NA	NA	NA
74	Astrocyte_progenitors	Layer_2-4_ExN	WNT3	FZD3_LRP6	8.15655e-08	0	WNT3_FZD3_LRP6	WNT3 - (FZD3+LRP6)	WNT	Secreted Signaling	KEGG: hsa04310; PMID: 23209147	NL	-0.362713	3.34821	28.7324	1.42686e-71	NA	NA	NA	NA
75	Astrocyte_progenitors	Astrocyte_progenitors	WNT3	FZD3_LRP6	1.30578e-07	0	WNT3_FZD3_LRP6	WNT3 - (FZD3+LRP6)	WNT	Secreted Signaling	KEGG: hsa04310; PMID: 23209147	NL	-0.362713	3.34821	28.7324	1.42686e-71	0.0681486	48.2887	49.5775	0.00194956
76	Astrocyte_progenitors	Mig_Layer_2-4_ExN	WNT3	FZD3_LRP6	8.37489e-08	0	WNT3_FZD3_LRP6	WNT3 - (FZD3+LRP6)	WNT	Secreted Signaling	KEGG: hsa04310; PMID: 23209147	NL	-0.362713	3.34821	28.7324	1.42686e-71	-0.0146426	43.2339	43.7294	0.0138682
77	Astrocyte_progenitors	IP	WNT3	FZD3_LRP6	8.58677e-08	0	WNT3_FZD3_LRP6	WNT3 - (FZD3+LRP6)	WNT	Secreted Signaling	KEGG: hsa04310; PMID: 23209147	NL	-0.362713	3.34821	28.7324	1.42686e-71	-0.114201	34.7437	39.8597	7.51756e-14
78	Astrocyte_progenitors	oRG	WNT3	FZD3_LRP6	1.44465e-07	0	WNT3_FZD3_LRP6	WNT3 - (FZD3+LRP6)	WNT	Secreted Signaling	KEGG: hsa04310; PMID: 23209147	NL	-0.362713	3.34821	28.7324	1.42686e-71	-0.129587	48.5294	52.0259	1.08744e-06
79	Astrocyte_progenitors	vRG	WNT3	FZD3_LRP6	1.47195e-07	0	WNT3_FZD3_LRP6	WNT3 - (FZD3+LRP6)	WNT	Secreted Signaling	KEGG: hsa04310; PMID: 23209147	NL	-0.362713	3.34821	28.7324	1.42686e-71	-0.200603	37.6012	46.7842	2.90495e-05
80	Astrocyte_progenitors	Cycling_progenitors	WNT3	FZD3_LRP6	8.66222e-08	0	WNT3_FZD3_LRP6	WNT3 - (FZD3+LRP6)	WNT	Secreted Signaling	KEGG: hsa04310; PMID: 23209147	NL	-0.362713	3.34821	28.7324	1.42686e-71	NA	NA	NA	NA
81	Astrocyte_progenitors	Layer_4-6_ExN	WNT3	FZD3_LRP6	7.84414e-08	0	WNT3_FZD3_LRP6	WNT3 - (FZD3+LRP6)	WNT	Secreted Signaling	KEGG: hsa04310; PMID: 23209147	NL	-0.362713	3.34821	28.7324	1.42686e-71	-0.10973	31.7553	36.8982	4.03139e-07
82	Astrocyte_progenitors	Layer_5-6_ExN	WNT3	FZD3_LRP6	8.15514e-08	0	WNT3_FZD3_LRP6	WNT3 - (FZD3+LRP6)	WNT	Secreted Signaling	KEGG: hsa04310; PMID: 23209147	NL	-0.362713	3.34821	28.7324	1.42686e-71	-0.115094	38.6963	43.8394	0.000368668
83	Astrocyte_progenitors	Smooth_muscle_2	WNT3	FZD3_LRP6	1.00209e-07	0	WNT3_FZD3_LRP6	WNT3 - (FZD3+LRP6)	WNT	Secreted Signaling	KEGG: hsa04310; PMID: 23209147	NL	-0.362713	3.34821	28.7324	1.42686e-71	-0.448531	52.0833	62.0253	0.0413838
84	Astrocyte_progenitors	OPC_1	WNT3	FZD3_LRP6	1.39142e-07	0	WNT3_FZD3_LRP6	WNT3 - (FZD3+LRP6)	WNT	Secreted Signaling	KEGG: hsa04310; PMID: 23209147	NL	-0.362713	3.34821	28.7324	1.42686e-71	NA	NA	NA	NA
85	Astrocyte_progenitors	Interneuron_4	WNT3	FZD3_LRP6	7.51256e-08	0	WNT3_FZD3_LRP6	WNT3 - (FZD3+LRP6)	WNT	Secreted Signaling	KEGG: hsa04310; PMID: 23209147	NL	-0.362713	3.34821	28.7324	1.42686e-71	-0.260756	30.2521	49.3151	0.0181894
86	Astrocyte_progenitors	IP_IN	WNT3	FZD3_LRP6	8.5038e-08	0	WNT3_FZD3_LRP6	WNT3 - (FZD3+LRP6)	WNT	Secreted Signaling	KEGG: hsa04310; PMID: 23209147	NL	-0.362713	3.34821	28.7324	1.42686e-71	NA	NA	NA	NA
87	Astrocyte_progenitors	Layer_4-5_ExN	WNT3	FZD3_LRP6	1.42965e-07	0	WNT3_FZD3_LRP6	WNT3 - (FZD3+LRP6)	WNT	Secreted Signaling	KEGG: hsa04310; PMID: 23209147	NL	-0.362713	3.34821	28.7324	1.42686e-71	NA	NA	NA	NA
88	Astrocyte_progenitors	Interneuron_M2	WNT3	FZD3_LRP6	7.50526e-08	0	WNT3_FZD3_LRP6	WNT3 - (FZD3+LRP6)	WNT	Secreted Signaling	KEGG: hsa04310; PMID: 23209147	NL	-0.362713	3.34821	28.7324	1.42686e-71	0.276669	51.1111	39.9027	3.04391e-16
89	Astrocyte_progenitors	Interneuron_S1	WNT3	FZD3_LRP6	7.65158e-08	0	WNT3_FZD3_LRP6	WNT3 - (FZD3+LRP6)	WNT	Secreted Signaling	KEGG: hsa04310; PMID: 23209147	NL	-0.362713	3.34821	28.7324	1.42686e-71	NA	NA	NA	NA
90	Astrocyte_progenitors	Interneuron_M1	WNT3	FZD3_LRP6	7.84874e-08	0	WNT3_FZD3_LRP6	WNT3 - (FZD3+LRP6)	WNT	Secreted Signaling	KEGG: hsa04310; PMID: 23209147	NL	-0.362713	3.34821	28.7324	1.42686e-71	0.001849	41.5888	44.7095	0.000248962
91	Astrocyte_progenitors	Interneuron_S2	WNT3	FZD3_LRP6	7.26073e-08	0	WNT3_FZD3_LRP6	WNT3 - (FZD3+LRP6)	WNT	Secreted Signaling	KEGG: hsa04310; PMID: 23209147	NL	-0.362713	3.34821	28.7324	1.42686e-71	0.259784	43.9474	37.3333	8.19235e-07
92	Astrocyte_progenitors	Smooth_muscle_2	WNT3	FZD4_LRP6	3.64545e-07	0	WNT3_FZD4_LRP6	WNT3 - (FZD4+LRP6)	WNT	Secreted Signaling	KEGG: hsa04310; PMID: 23209147	NL	-0.362713	3.34821	28.7324	1.42686e-71	-0.852604	40.625	62.9747	0.0206919
93	Astrocyte_progenitors	Smooth_muscle_2	WNT3	FZD6_LRP6	3.39841e-07	0	WNT3_FZD6_LRP6	WNT3 - (FZD6+LRP6)	WNT	Secreted Signaling	KEGG: hsa04310; PMID: 23209147	NL	-0.362713	3.34821	28.7324	1.42686e-71	-0.567364	39.9306	58.2278	0.0206921
94	Mig_Layer_2-3_ExN	Mig_Layer_2-3_ExN	WNT5B	FZD3	7.42952e-08	0	WNT5B_FZD3	WNT5B - FZD3	ncWNT	Secreted Signaling	KEGG: hsa04310	NL	-0.0977163	24.398	28.7718	6.5433e-31	NA	NA	NA	NA
95	Mig_Layer_2-3_ExN	Layer_2-4_ExN	WNT5B	FZD3	7.40822e-08	0	WNT5B_FZD3	WNT5B - FZD3	ncWNT	Secreted Signaling	KEGG: hsa04310	NL	-0.0977163	24.398	28.7718	6.5433e-31	NA	NA	NA	NA
96	Mig_Layer_2-3_ExN	Astrocyte_progenitors	WNT5B	FZD3	1.91754e-07	0	WNT5B_FZD3	WNT5B - FZD3	ncWNT	Secreted Signaling	KEGG: hsa04310	NL	-0.0977163	24.398	28.7718	6.5433e-31	NA	NA	NA	NA
97	Mig_Layer_2-3_ExN	Mig_Layer_2-4_ExN	WNT5B	FZD3	7.67813e-08	0	WNT5B_FZD3	WNT5B - FZD3	ncWNT	Secreted Signaling	KEGG: hsa04310	NL	-0.0977163	24.398	28.7718	6.5433e-31	0.0506891	40.7791	39.0099	0.00412694
98	Mig_Layer_2-3_ExN	IP	WNT5B	FZD3	7.90812e-08	0	WNT5B_FZD3	WNT5B - FZD3	ncWNT	Secreted Signaling	KEGG: hsa04310	NL	-0.0977163	24.398	28.7718	6.5433e-31	NA	NA	NA	NA
99	Mig_Layer_2-3_ExN	oRG	WNT5B	FZD3	7.92305e-08	0	WNT5B_FZD3	WNT5B - FZD3	ncWNT	Secreted Signaling	KEGG: hsa04310	NL	-0.0977163	24.398	28.7718	6.5433e-31	NA	NA	NA	NA
100	Mig_Layer_2-3_ExN	vRG	WNT5B	FZD3	7.89996e-08	0	WNT5B_FZD3	WNT5B - FZD3	ncWNT	Secreted Signaling	KEGG: hsa04310	NL	-0.0977163	24.398	28.7718	6.5433e-31	-0.15831	28.8462	38.3817	1.7765e-05
101	Mig_Layer_2-3_ExN	Cycling_progenitors	WNT5B	FZD3	7.96772e-08	0	WNT5B_FZD3	WNT5B - FZD3	ncWNT	Secreted Signaling	KEGG: hsa04310	NL	-0.0977163	24.398	28.7718	6.5433e-31	NA	NA	NA	NA
102	Mig_Layer_2-3_ExN	Layer_4-6_ExN	WNT5B	FZD3	7.33742e-08	0	WNT5B_FZD3	WNT5B - FZD3	ncWNT	Secreted Signaling	KEGG: hsa04310	NL	-0.0977163	24.398	28.7718	6.5433e-31	-0.10973	31.7553	36.8982	4.03139e-07
103	Mig_Layer_2-3_ExN	Layer_5-6_ExN	WNT5B	FZD3	7.70353e-08	0	WNT5B_FZD3	WNT5B - FZD3	ncWNT	Secreted Signaling	KEGG: hsa04310	NL	-0.0977163	24.398	28.7718	6.5433e-31	-0.13366	38.8037	45.3612	6.73879e-08
104	Mig_Layer_2-3_ExN	Smooth_muscle_2	WNT5B	FZD3	2.91688e-08	0.04	WNT5B_FZD3	WNT5B - FZD3	ncWNT	Secreted Signaling	KEGG: hsa04310	NL	-0.0977163	24.398	28.7718	6.5433e-31	NA	NA	NA	NA
105	Mig_Layer_2-3_ExN	OPC_1	WNT5B	FZD3	5.27482e-08	0.01	WNT5B_FZD3	WNT5B - FZD3	ncWNT	Secreted Signaling	KEGG: hsa04310	NL	-0.0977163	24.398	28.7718	6.5433e-31	NA	NA	NA	NA
106	Mig_Layer_2-3_ExN	Interneuron_4	WNT5B	FZD3	6.189e-08	0	WNT5B_FZD3	WNT5B - FZD3	ncWNT	Secreted Signaling	KEGG: hsa04310	NL	-0.0977163	24.398	28.7718	6.5433e-31	NA	NA	NA	NA
107	Mig_Layer_2-3_ExN	IP_IN	WNT5B	FZD3	7.77072e-08	0	WNT5B_FZD3	WNT5B - FZD3	ncWNT	Secreted Signaling	KEGG: hsa04310	NL	-0.0977163	24.398	28.7718	6.5433e-31	NA	NA	NA	NA
108	Mig_Layer_2-3_ExN	Layer_4-5_ExN	WNT5B	FZD3	8.36671e-08	0	WNT5B_FZD3	WNT5B - FZD3	ncWNT	Secreted Signaling	KEGG: hsa04310	NL	-0.0977163	24.398	28.7718	6.5433e-31	NA	NA	NA	NA
109	Mig_Layer_2-3_ExN	Interneuron_M2	WNT5B	FZD3	7.50351e-08	0	WNT5B_FZD3	WNT5B - FZD3	ncWNT	Secreted Signaling	KEGG: hsa04310	NL	-0.0977163	24.398	28.7718	6.5433e-31	0.276669	51.1111	39.9027	3.04391e-16
110	Mig_Layer_2-3_ExN	Interneuron_S1	WNT5B	FZD3	6.68513e-08	0	WNT5B_FZD3	WNT5B - FZD3	ncWNT	Secreted Signaling	KEGG: hsa04310	NL	-0.0977163	24.398	28.7718	6.5433e-31	NA	NA	NA	NA
111	Mig_Layer_2-3_ExN	Interneuron_M1	WNT5B	FZD3	7.66882e-08	0	WNT5B_FZD3	WNT5B - FZD3	ncWNT	Secreted Signaling	KEGG: hsa04310	NL	-0.0977163	24.398	28.7718	6.5433e-31	0.124714	52.8037	49.1701	5.6918e-08
112	Mig_Layer_2-3_ExN	Interneuron_S2	WNT5B	FZD3	6.2811e-08	0	WNT5B_FZD3	WNT5B - FZD3	ncWNT	Secreted Signaling	KEGG: hsa04310	NL	-0.0977163	24.398	28.7718	6.5433e-31	0.259784	43.9474	37.3333	8.19235e-07
113	Mig_Layer_2-3_ExN	Smooth_muscle_2	WNT5B	FZD4	3.86021e-07	0	WNT5B_FZD4	WNT5B - FZD4	ncWNT	Secreted Signaling	KEGG: hsa04310	NL	-0.0977163	24.398	28.7718	6.5433e-31	-1.25668	29.1667	63.9241	4.23902e-12
114	Mig_Layer_2-3_ExN	Smooth_muscle_2	WNT5B	FZD6	3.35475e-07	0	WNT5B_FZD6	WNT5B - FZD6	ncWNT	Secreted Signaling	KEGG: hsa04310	NL	-0.0977163	24.398	28.7718	6.5433e-31	-0.686196	27.7778	54.4304	3.76983e-07
115	Smooth_muscle_2	Astrocyte_progenitors	HBEGF	EGFR	1.29349e-06	0	HBEGF_EGFR	HBEGF - EGFR	EGF	Secreted Signaling	KEGG: hsa04012	NL	-1.08746	9.02778	32.9114	9.56852e-08	-2.78924	58.1101	82.8169	4.02108e-46
116	Smooth_muscle_2	vRG	HBEGF	EGFR	8.4791e-08	0	HBEGF_EGFR	HBEGF - EGFR	EGF	Secreted Signaling	KEGG: hsa04012	NL	-1.08746	9.02778	32.9114	9.56852e-08	NA	NA	NA	NA
117	Smooth_muscle_2	Smooth_muscle_2	HBEGF	EGFR	7.35667e-08	0	HBEGF_EGFR	HBEGF - EGFR	EGF	Secreted Signaling	KEGG: hsa04012	NL	-1.08746	9.02778	32.9114	9.56852e-08	NA	NA	NA	NA
118	Smooth_muscle_2	Smooth_muscle_1	HBEGF	EGFR	9.17218e-08	0	HBEGF_EGFR	HBEGF - EGFR	EGF	Secreted Signaling	KEGG: hsa04012	NL	-1.08746	9.02778	32.9114	9.56852e-08	NA	NA	NA	NA
119	Smooth_muscle_2	Astrocyte_progenitors	HBEGF	ERBB4	1.147e-06	0	HBEGF_ERBB4	HBEGF - ERBB4	EGF	Secreted Signaling	KEGG: hsa04012	NL	-1.08746	9.02778	32.9114	9.56852e-08	4.59006	86.6815	74.3662	2.15438e-55
120	Smooth_muscle_2	Interneuron_2	HBEGF	ERBB4	7.7547e-06	0	HBEGF_ERBB4	HBEGF - ERBB4	EGF	Secreted Signaling	KEGG: hsa04012	NL	-1.08746	9.02778	32.9114	9.56852e-08	9.14795	99.7113	94.6765	2.491e-97
121	Smooth_muscle_2	Interneuron_1	HBEGF	ERBB4	2.43715e-06	0	HBEGF_ERBB4	HBEGF - ERBB4	EGF	Secreted Signaling	KEGG: hsa04012	NL	-1.08746	9.02778	32.9114	9.56852e-08	5.50962	88.9874	75.9783	3.02706e-62
122	Smooth_muscle_2	Interneuron_3	HBEGF	ERBB4	1.50354e-05	0	HBEGF_ERBB4	HBEGF - ERBB4	EGF	Secreted Signaling	KEGG: hsa04012	NL	-1.08746	9.02778	32.9114	9.56852e-08	NA	NA	NA	NA
123	Smooth_muscle_2	OPC_1	HBEGF	ERBB4	8.43895e-07	0	HBEGF_ERBB4	HBEGF - ERBB4	EGF	Secreted Signaling	KEGG: hsa04012	NL	-1.08746	9.02778	32.9114	9.56852e-08	0.945734	86.8275	70.1107	1.79322e-06
124	Smooth_muscle_2	Interneuron_4	HBEGF	ERBB4	5.12129e-06	0	HBEGF_ERBB4	HBEGF - ERBB4	EGF	Secreted Signaling	KEGG: hsa04012	NL	-1.08746	9.02778	32.9114	9.56852e-08	NA	NA	NA	NA
125	Smooth_muscle_2	IP_IN	HBEGF	ERBB4	9.96906e-08	0	HBEGF_ERBB4	HBEGF - ERBB4	EGF	Secreted Signaling	KEGG: hsa04012	NL	-1.08746	9.02778	32.9114	9.56852e-08	-0.84693	29.878	44.6697	0.000454406
126	Smooth_muscle_2	Interneuron_M2	HBEGF	ERBB4	3.13011e-08	0	HBEGF_ERBB4	HBEGF - ERBB4	EGF	Secreted Signaling	KEGG: hsa04012	NL	-1.08746	9.02778	32.9114	9.56852e-08	-0.1447	17.3611	33.455	6.28796e-18
127	Smooth_muscle_2	Interneuron_S1	HBEGF	ERBB4	6.03226e-06	0	HBEGF_ERBB4	HBEGF - ERBB4	EGF	Secreted Signaling	KEGG: hsa04012	NL	-1.08746	9.02778	32.9114	9.56852e-08	-3.02064	91.8587	92.1225	0.00161662
128	Smooth_muscle_2	Interneuron_M1	HBEGF	ERBB4	7.92317e-08	0	HBEGF_ERBB4	HBEGF - ERBB4	EGF	Secreted Signaling	KEGG: hsa04012	NL	-1.08746	9.02778	32.9114	9.56852e-08	0.161142	25.1558	40.8714	2.55184e-11
129	Smooth_muscle_2	Interneuron_S2	HBEGF	ERBB4	1.11996e-07	0	HBEGF_ERBB4	HBEGF - ERBB4	EGF	Secreted Signaling	KEGG: hsa04012	NL	-1.08746	9.02778	32.9114	9.56852e-08	8.69819	68.6842	44	6.87253e-34
130	Mig_Layer_2-3_ExN	OPC_1	NRG1	ERBB3	2.42022e-06	0	NRG1_ERBB3	NRG1 - ERBB3	NRG	Secreted Signaling	KEGG: hsa04012	NL	-1.87018	89.519	87.2219	4.04073e-19	NA	NA	NA	NA
131	Astrocyte_progenitors	OPC_1	NRG1	ERBB3	2.44759e-07	0	NRG1_ERBB3	NRG1 - ERBB3	NRG	Secreted Signaling	KEGG: hsa04012	NL	-2.62878	27.9762	43.5681	3.07612e-25	NA	NA	NA	NA
132	Layer_5-6_ExN	OPC_1	NRG1	ERBB3	1.67321e-06	0	NRG1_ERBB3	NRG1 - ERBB3	NRG	Secreted Signaling	KEGG: hsa04012	NL	-1.22466	81.1043	82.6549	2.08773e-05	NA	NA	NA	NA
133	Mig_Layer_2-3_ExN	OL	NRG1	ERBB3	9.94646e-06	0	NRG1_ERBB3	NRG1 - ERBB3	NRG	Secreted Signaling	KEGG: hsa04012	NL	-1.87018	89.519	87.2219	4.04073e-19	NA	NA	NA	NA
134	Astrocyte_progenitors	OL	NRG1	ERBB3	1.0059e-06	0	NRG1_ERBB3	NRG1 - ERBB3	NRG	Secreted Signaling	KEGG: hsa04012	NL	-2.62878	27.9762	43.5681	3.07612e-25	NA	NA	NA	NA
135	Layer_5-6_ExN	OL	NRG1	ERBB3	6.87647e-06	0	NRG1_ERBB3	NRG1 - ERBB3	NRG	Secreted Signaling	KEGG: hsa04012	NL	-1.22466	81.1043	82.6549	2.08773e-05	NA	NA	NA	NA
136	Mig_Layer_2-3_ExN	Astrocyte_progenitors	NRG1	ERBB4	3.05262e-05	0	NRG1_ERBB4	NRG1 - ERBB4	NRG	Secreted Signaling	KEGG: hsa04012	NL	-1.87018	89.519	87.2219	4.04073e-19	4.59006	86.6815	74.3662	2.15438e-55
137	Astrocyte_progenitors	Astrocyte_progenitors	NRG1	ERBB4	3.08722e-06	0	NRG1_ERBB4	NRG1 - ERBB4	NRG	Secreted Signaling	KEGG: hsa04012	NL	-2.62878	27.9762	43.5681	3.07612e-25	4.59006	86.6815	74.3662	2.15438e-55
138	Layer_5-6_ExN	Astrocyte_progenitors	NRG1	ERBB4	2.11044e-05	0	NRG1_ERBB4	NRG1 - ERBB4	NRG	Secreted Signaling	KEGG: hsa04012	NL	-1.22466	81.1043	82.6549	2.08773e-05	4.59006	86.6815	74.3662	2.15438e-55
139	Mig_Layer_2-3_ExN	Interneuron_2	NRG1	ERBB4	0.000206348	0	NRG1_ERBB4	NRG1 - ERBB4	NRG	Secreted Signaling	KEGG: hsa04012	NL	-1.87018	89.519	87.2219	4.04073e-19	9.14795	99.7113	94.6765	2.491e-97
140	Astrocyte_progenitors	Interneuron_2	NRG1	ERBB4	2.0872e-05	0	NRG1_ERBB4	NRG1 - ERBB4	NRG	Secreted Signaling	KEGG: hsa04012	NL	-2.62878	27.9762	43.5681	3.07612e-25	9.14795	99.7113	94.6765	2.491e-97
141	Layer_5-6_ExN	Interneuron_2	NRG1	ERBB4	0.000142667	0	NRG1_ERBB4	NRG1 - ERBB4	NRG	Secreted Signaling	KEGG: hsa04012	NL	-1.22466	81.1043	82.6549	2.08773e-05	9.14795	99.7113	94.6765	2.491e-97
142	Mig_Layer_2-3_ExN	Interneuron_1	NRG1	ERBB4	6.486e-05	0	NRG1_ERBB4	NRG1 - ERBB4	NRG	Secreted Signaling	KEGG: hsa04012	NL	-1.87018	89.519	87.2219	4.04073e-19	5.50962	88.9874	75.9783	3.02706e-62
143	Astrocyte_progenitors	Interneuron_1	NRG1	ERBB4	6.55972e-06	0	NRG1_ERBB4	NRG1 - ERBB4	NRG	Secreted Signaling	KEGG: hsa04012	NL	-2.62878	27.9762	43.5681	3.07612e-25	5.50962	88.9874	75.9783	3.02706e-62
144	Layer_5-6_ExN	Interneuron_1	NRG1	ERBB4	4.48417e-05	0	NRG1_ERBB4	NRG1 - ERBB4	NRG	Secreted Signaling	KEGG: hsa04012	NL	-1.22466	81.1043	82.6549	2.08773e-05	5.50962	88.9874	75.9783	3.02706e-62
145	Mig_Layer_2-3_ExN	Interneuron_3	NRG1	ERBB4	0.000400009	0	NRG1_ERBB4	NRG1 - ERBB4	NRG	Secreted Signaling	KEGG: hsa04012	NL	-1.87018	89.519	87.2219	4.04073e-19	NA	NA	NA	NA
146	Astrocyte_progenitors	Interneuron_3	NRG1	ERBB4	4.04677e-05	0	NRG1_ERBB4	NRG1 - ERBB4	NRG	Secreted Signaling	KEGG: hsa04012	NL	-2.62878	27.9762	43.5681	3.07612e-25	NA	NA	NA	NA
147	Layer_5-6_ExN	Interneuron_3	NRG1	ERBB4	0.000276579	0	NRG1_ERBB4	NRG1 - ERBB4	NRG	Secreted Signaling	KEGG: hsa04012	NL	-1.22466	81.1043	82.6549	2.08773e-05	NA	NA	NA	NA
148	Mig_Layer_2-3_ExN	OPC_1	NRG1	ERBB4	2.24596e-05	0	NRG1_ERBB4	NRG1 - ERBB4	NRG	Secreted Signaling	KEGG: hsa04012	NL	-1.87018	89.519	87.2219	4.04073e-19	0.945734	86.8275	70.1107	1.79322e-06
149	Astrocyte_progenitors	OPC_1	NRG1	ERBB4	2.2714e-06	0	NRG1_ERBB4	NRG1 - ERBB4	NRG	Secreted Signaling	KEGG: hsa04012	NL	-2.62878	27.9762	43.5681	3.07612e-25	0.945734	86.8275	70.1107	1.79322e-06
150	Layer_5-6_ExN	OPC_1	NRG1	ERBB4	1.55275e-05	0	NRG1_ERBB4	NRG1 - ERBB4	NRG	Secreted Signaling	KEGG: hsa04012	NL	-1.22466	81.1043	82.6549	2.08773e-05	0.945734	86.8275	70.1107	1.79322e-06
151	Mig_Layer_2-3_ExN	Interneuron_4	NRG1	ERBB4	0.000136284	0	NRG1_ERBB4	NRG1 - ERBB4	NRG	Secreted Signaling	KEGG: hsa04012	NL	-1.87018	89.519	87.2219	4.04073e-19	NA	NA	NA	NA
152	Astrocyte_progenitors	Interneuron_4	NRG1	ERBB4	1.37842e-05	0	NRG1_ERBB4	NRG1 - ERBB4	NRG	Secreted Signaling	KEGG: hsa04012	NL	-2.62878	27.9762	43.5681	3.07612e-25	NA	NA	NA	NA
153	Layer_5-6_ExN	Interneuron_4	NRG1	ERBB4	9.42236e-05	0	NRG1_ERBB4	NRG1 - ERBB4	NRG	Secreted Signaling	KEGG: hsa04012	NL	-1.22466	81.1043	82.6549	2.08773e-05	NA	NA	NA	NA
154	Mig_Layer_2-3_ExN	IP_IN	NRG1	ERBB4	2.65324e-06	0	NRG1_ERBB4	NRG1 - ERBB4	NRG	Secreted Signaling	KEGG: hsa04012	NL	-1.87018	89.519	87.2219	4.04073e-19	-0.84693	29.878	44.6697	0.000454406
155	Astrocyte_progenitors	IP_IN	NRG1	ERBB4	2.68324e-07	0	NRG1_ERBB4	NRG1 - ERBB4	NRG	Secreted Signaling	KEGG: hsa04012	NL	-2.62878	27.9762	43.5681	3.07612e-25	-0.84693	29.878	44.6697	0.000454406
156	Layer_5-6_ExN	IP_IN	NRG1	ERBB4	1.83431e-06	0	NRG1_ERBB4	NRG1 - ERBB4	NRG	Secreted Signaling	KEGG: hsa04012	NL	-1.22466	81.1043	82.6549	2.08773e-05	-0.84693	29.878	44.6697	0.000454406
157	Mig_Layer_2-3_ExN	Interneuron_M2	NRG1	ERBB4	8.33072e-07	0	NRG1_ERBB4	NRG1 - ERBB4	NRG	Secreted Signaling	KEGG: hsa04012	NL	-1.87018	89.519	87.2219	4.04073e-19	-0.1447	17.3611	33.455	6.28796e-18
158	Layer_5-6_ExN	Interneuron_M2	NRG1	ERBB4	5.75942e-07	0	NRG1_ERBB4	NRG1 - ERBB4	NRG	Secreted Signaling	KEGG: hsa04012	NL	-1.22466	81.1043	82.6549	2.08773e-05	-0.1447	17.3611	33.455	6.28796e-18
159	Mig_Layer_2-3_ExN	Interneuron_S1	NRG1	ERBB4	0.000160522	0	NRG1_ERBB4	NRG1 - ERBB4	NRG	Secreted Signaling	KEGG: hsa04012	NL	-1.87018	89.519	87.2219	4.04073e-19	-3.02064	91.8587	92.1225	0.00161662
160	Astrocyte_progenitors	Interneuron_S1	NRG1	ERBB4	1.62361e-05	0	NRG1_ERBB4	NRG1 - ERBB4	NRG	Secreted Signaling	KEGG: hsa04012	NL	-2.62878	27.9762	43.5681	3.07612e-25	-3.02064	91.8587	92.1225	0.00161662
161	Layer_5-6_ExN	Interneuron_S1	NRG1	ERBB4	0.000110982	0	NRG1_ERBB4	NRG1 - ERBB4	NRG	Secreted Signaling	KEGG: hsa04012	NL	-1.22466	81.1043	82.6549	2.08773e-05	-3.02064	91.8587	92.1225	0.00161662
162	Mig_Layer_2-3_ExN	Interneuron_M1	NRG1	ERBB4	2.10873e-06	0	NRG1_ERBB4	NRG1 - ERBB4	NRG	Secreted Signaling	KEGG: hsa04012	NL	-1.87018	89.519	87.2219	4.04073e-19	0.161142	25.1558	40.8714	2.55184e-11
163	Layer_5-6_ExN	Interneuron_M1	NRG1	ERBB4	1.45786e-06	0	NRG1_ERBB4	NRG1 - ERBB4	NRG	Secreted Signaling	KEGG: hsa04012	NL	-1.22466	81.1043	82.6549	2.08773e-05	0.161142	25.1558	40.8714	2.55184e-11
164	Mig_Layer_2-3_ExN	Interneuron_S2	NRG1	ERBB4	2.98074e-06	0	NRG1_ERBB4	NRG1 - ERBB4	NRG	Secreted Signaling	KEGG: hsa04012	NL	-1.87018	89.519	87.2219	4.04073e-19	8.69819	68.6842	44	6.87253e-34
165	Layer_5-6_ExN	Interneuron_S2	NRG1	ERBB4	2.06073e-06	0	NRG1_ERBB4	NRG1 - ERBB4	NRG	Secreted Signaling	KEGG: hsa04012	NL	-1.22466	81.1043	82.6549	2.08773e-05	8.69819	68.6842	44	6.87253e-34
166	Astrocyte_progenitors	OPC_1	NRG2	ERBB3	8.25967e-08	0	NRG2_ERBB3	NRG2 - ERBB3	NRG	Secreted Signaling	KEGG: hsa04012	NL	-0.214869	17.4107	26.0094	2.78206e-07	NA	NA	NA	NA
167	Astrocyte_progenitors	OL	NRG2	ERBB3	3.39453e-07	0	NRG2_ERBB3	NRG2 - ERBB3	NRG	Secreted Signaling	KEGG: hsa04012	NL	-0.214869	17.4107	26.0094	2.78206e-07	NA	NA	NA	NA
168	Astrocyte_progenitors	Astrocyte_progenitors	NRG2	ERBB4	1.04182e-06	0	NRG2_ERBB4	NRG2 - ERBB4	NRG	Secreted Signaling	KEGG: hsa04012	NL	-0.214869	17.4107	26.0094	2.78206e-07	4.59006	86.6815	74.3662	2.15438e-55
169	Astrocyte_progenitors	Interneuron_2	NRG2	ERBB4	7.04361e-06	0	NRG2_ERBB4	NRG2 - ERBB4	NRG	Secreted Signaling	KEGG: hsa04012	NL	-0.214869	17.4107	26.0094	2.78206e-07	9.14795	99.7113	94.6765	2.491e-97
170	Astrocyte_progenitors	Interneuron_1	NRG2	ERBB4	2.21366e-06	0	NRG2_ERBB4	NRG2 - ERBB4	NRG	Secreted Signaling	KEGG: hsa04012	NL	-0.214869	17.4107	26.0094	2.78206e-07	5.50962	88.9874	75.9783	3.02706e-62
171	Astrocyte_progenitors	Interneuron_3	NRG2	ERBB4	1.36567e-05	0	NRG2_ERBB4	NRG2 - ERBB4	NRG	Secreted Signaling	KEGG: hsa04012	NL	-0.214869	17.4107	26.0094	2.78206e-07	NA	NA	NA	NA
172	Astrocyte_progenitors	OPC_1	NRG2	ERBB4	7.66511e-07	0	NRG2_ERBB4	NRG2 - ERBB4	NRG	Secreted Signaling	KEGG: hsa04012	NL	-0.214869	17.4107	26.0094	2.78206e-07	0.945734	86.8275	70.1107	1.79322e-06
173	Astrocyte_progenitors	Interneuron_4	NRG2	ERBB4	4.65168e-06	0	NRG2_ERBB4	NRG2 - ERBB4	NRG	Secreted Signaling	KEGG: hsa04012	NL	-0.214869	17.4107	26.0094	2.78206e-07	NA	NA	NA	NA
174	Astrocyte_progenitors	IP_IN	NRG2	ERBB4	9.05492e-08	0	NRG2_ERBB4	NRG2 - ERBB4	NRG	Secreted Signaling	KEGG: hsa04012	NL	-0.214869	17.4107	26.0094	2.78206e-07	-0.84693	29.878	44.6697	0.000454406
175	Astrocyte_progenitors	Interneuron_M2	NRG2	ERBB4	2.84309e-08	0	NRG2_ERBB4	NRG2 - ERBB4	NRG	Secreted Signaling	KEGG: hsa04012	NL	-0.214869	17.4107	26.0094	2.78206e-07	-0.1447	17.3611	33.455	6.28796e-18
176	Astrocyte_progenitors	Interneuron_S1	NRG2	ERBB4	5.47912e-06	0	NRG2_ERBB4	NRG2 - ERBB4	NRG	Secreted Signaling	KEGG: hsa04012	NL	-0.214869	17.4107	26.0094	2.78206e-07	-3.02064	91.8587	92.1225	0.00161662
177	Astrocyte_progenitors	Interneuron_M1	NRG2	ERBB4	7.19663e-08	0	NRG2_ERBB4	NRG2 - ERBB4	NRG	Secreted Signaling	KEGG: hsa04012	NL	-0.214869	17.4107	26.0094	2.78206e-07	0.161142	25.1558	40.8714	2.55184e-11
178	Astrocyte_progenitors	Interneuron_S2	NRG2	ERBB4	1.01726e-07	0	NRG2_ERBB4	NRG2 - ERBB4	NRG	Secreted Signaling	KEGG: hsa04012	NL	-0.214869	17.4107	26.0094	2.78206e-07	8.69819	68.6842	44	6.87253e-34
179	oRG	Astrocyte_progenitors	NRG3	ERBB4	1.26847e-05	0	NRG3_ERBB4	NRG3 - ERBB4	NRG	Secreted Signaling	KEGG: hsa04012	NL	-1.08027	77.3266	79.8217	6.62531e-33	4.59006	86.6815	74.3662	2.15438e-55
180	Interneuron_S1	Astrocyte_progenitors	NRG3	ERBB4	7.33578e-07	0	NRG3_ERBB4	NRG3 - ERBB4	NRG	Secreted Signaling	KEGG: hsa04012	NL	-0.111527	41.1674	34.5733	0.00861212	4.59006	86.6815	74.3662	2.15438e-55
181	oRG	Interneuron_2	NRG3	ERBB4	8.57535e-05	0	NRG3_ERBB4	NRG3 - ERBB4	NRG	Secreted Signaling	KEGG: hsa04012	NL	-1.08027	77.3266	79.8217	6.62531e-33	9.14795	99.7113	94.6765	2.491e-97
182	Interneuron_S1	Interneuron_2	NRG3	ERBB4	4.95963e-06	0	NRG3_ERBB4	NRG3 - ERBB4	NRG	Secreted Signaling	KEGG: hsa04012	NL	-0.111527	41.1674	34.5733	0.00861212	9.14795	99.7113	94.6765	2.491e-97
183	oRG	Interneuron_1	NRG3	ERBB4	2.6952e-05	0	NRG3_ERBB4	NRG3 - ERBB4	NRG	Secreted Signaling	KEGG: hsa04012	NL	-1.08027	77.3266	79.8217	6.62531e-33	5.50962	88.9874	75.9783	3.02706e-62
184	Interneuron_S1	Interneuron_1	NRG3	ERBB4	1.55871e-06	0	NRG3_ERBB4	NRG3 - ERBB4	NRG	Secreted Signaling	KEGG: hsa04012	NL	-0.111527	41.1674	34.5733	0.00861212	5.50962	88.9874	75.9783	3.02706e-62
185	oRG	Interneuron_3	NRG3	ERBB4	0.000166253	0	NRG3_ERBB4	NRG3 - ERBB4	NRG	Secreted Signaling	KEGG: hsa04012	NL	-1.08027	77.3266	79.8217	6.62531e-33	NA	NA	NA	NA
186	Interneuron_S1	Interneuron_3	NRG3	ERBB4	9.61611e-06	0	NRG3_ERBB4	NRG3 - ERBB4	NRG	Secreted Signaling	KEGG: hsa04012	NL	-0.111527	41.1674	34.5733	0.00861212	NA	NA	NA	NA
187	oRG	OPC_1	NRG3	ERBB4	9.33267e-06	0	NRG3_ERBB4	NRG3 - ERBB4	NRG	Secreted Signaling	KEGG: hsa04012	NL	-1.08027	77.3266	79.8217	6.62531e-33	0.945734	86.8275	70.1107	1.79322e-06
188	Interneuron_S1	OPC_1	NRG3	ERBB4	5.39724e-07	0	NRG3_ERBB4	NRG3 - ERBB4	NRG	Secreted Signaling	KEGG: hsa04012	NL	-0.111527	41.1674	34.5733	0.00861212	0.945734	86.8275	70.1107	1.79322e-06
189	oRG	Interneuron_4	NRG3	ERBB4	5.66341e-05	0	NRG3_ERBB4	NRG3 - ERBB4	NRG	Secreted Signaling	KEGG: hsa04012	NL	-1.08027	77.3266	79.8217	6.62531e-33	NA	NA	NA	NA
190	Interneuron_S1	Interneuron_4	NRG3	ERBB4	3.27539e-06	0	NRG3_ERBB4	NRG3 - ERBB4	NRG	Secreted Signaling	KEGG: hsa04012	NL	-0.111527	41.1674	34.5733	0.00861212	NA	NA	NA	NA
191	oRG	IP_IN	NRG3	ERBB4	1.10249e-06	0	NRG3_ERBB4	NRG3 - ERBB4	NRG	Secreted Signaling	KEGG: hsa04012	NL	-1.08027	77.3266	79.8217	6.62531e-33	-0.84693	29.878	44.6697	0.000454406
192	Interneuron_S1	IP_IN	NRG3	ERBB4	6.37584e-08	0.02	NRG3_ERBB4	NRG3 - ERBB4	NRG	Secreted Signaling	KEGG: hsa04012	NL	-0.111527	41.1674	34.5733	0.00861212	-0.84693	29.878	44.6697	0.000454406
193	oRG	Interneuron_M2	NRG3	ERBB4	3.46163e-07	0	NRG3_ERBB4	NRG3 - ERBB4	NRG	Secreted Signaling	KEGG: hsa04012	NL	-1.08027	77.3266	79.8217	6.62531e-33	-0.1447	17.3611	33.455	6.28796e-18
194	oRG	Interneuron_S1	NRG3	ERBB4	6.67075e-05	0	NRG3_ERBB4	NRG3 - ERBB4	NRG	Secreted Signaling	KEGG: hsa04012	NL	-1.08027	77.3266	79.8217	6.62531e-33	-3.02064	91.8587	92.1225	0.00161662
195	Interneuron_S1	Interneuron_S1	NRG3	ERBB4	3.85802e-06	0	NRG3_ERBB4	NRG3 - ERBB4	NRG	Secreted Signaling	KEGG: hsa04012	NL	-0.111527	41.1674	34.5733	0.00861212	-3.02064	91.8587	92.1225	0.00161662
196	oRG	Interneuron_M1	NRG3	ERBB4	8.76233e-07	0	NRG3_ERBB4	NRG3 - ERBB4	NRG	Secreted Signaling	KEGG: hsa04012	NL	-1.08027	77.3266	79.8217	6.62531e-33	0.161142	25.1558	40.8714	2.55184e-11
197	oRG	Interneuron_S2	NRG3	ERBB4	1.23858e-06	0	NRG3_ERBB4	NRG3 - ERBB4	NRG	Secreted Signaling	KEGG: hsa04012	NL	-1.08027	77.3266	79.8217	6.62531e-33	8.69819	68.6842	44	6.87253e-34
198	Layer_2-4_ExN	Astrocyte_progenitors	FGF9	FGFR1	3.83629e-07	0	FGF9_FGFR1	FGF9 - FGFR1	FGF	Secreted Signaling	PMC: 4393358	NL	-0.0661373	22.3865	26.2091	2.61903e-08	-1.10178	49.9256	72.8638	4.50914e-41
199	Layer_2-4_ExN	oRG	FGF9	FGFR1	7.44115e-08	0	FGF9_FGFR1	FGF9 - FGFR1	FGF	Secreted Signaling	PMC: 4393358	NL	-0.0661373	22.3865	26.2091	2.61903e-08	-0.12688	34.3942	39.8055	1.66563e-09
200	Layer_2-4_ExN	vRG	FGF9	FGFR1	7.1031e-08	0	FGF9_FGFR1	FGF9 - FGFR1	FGF	Secreted Signaling	PMC: 4393358	NL	-0.0661373	22.3865	26.2091	2.61903e-08	-0.178072	19.2308	28.527	2.71037e-06
201	Layer_2-4_ExN	Cycling_progenitors	FGF9	FGFR1	7.04712e-08	0	FGF9_FGFR1	FGF9 - FGFR1	FGF	Secreted Signaling	PMC: 4393358	NL	-0.0661373	22.3865	26.2091	2.61903e-08	-0.0915531	27.6794	31.3333	0.00963137
202	Layer_2-4_ExN	Smooth_muscle_2	FGF9	FGFR1	5.4616e-07	0	FGF9_FGFR1	FGF9 - FGFR1	FGF	Secreted Signaling	PMC: 4393358	NL	-0.0661373	22.3865	26.2091	2.61903e-08	-1.54928	50	68.3544	2.94903e-07
203	Layer_2-4_ExN	OPC_1	FGF9	FGFR1	7.34072e-08	0	FGF9_FGFR1	FGF9 - FGFR1	FGF	Secreted Signaling	PMC: 4393358	NL	-0.0661373	22.3865	26.2091	2.61903e-08	NA	NA	NA	NA
204	Layer_2-4_ExN	Smooth_muscle_1	FGF9	FGFR1	2.66268e-08	0	FGF9_FGFR1	FGF9 - FGFR1	FGF	Secreted Signaling	PMC: 4393358	NL	-0.0661373	22.3865	26.2091	2.61903e-08	NA	NA	NA	NA
205	Layer_2-4_ExN	Mig_Layer_2-3_ExN	FGF9	FGFR2	7.51427e-08	0	FGF9_FGFR2	FGF9 - FGFR2	FGF	Secreted Signaling	PMC: 4393358	NL	-0.0661373	22.3865	26.2091	2.61903e-08	NA	NA	NA	NA
206	Layer_2-4_ExN	Astrocyte_progenitors	FGF9	FGFR2	6.29862e-08	0	FGF9_FGFR2	FGF9 - FGFR2	FGF	Secreted Signaling	PMC: 4393358	NL	-0.0661373	22.3865	26.2091	2.61903e-08	NA	NA	NA	NA
207	Layer_2-4_ExN	IP	FGF9	FGFR2	7.26783e-08	0	FGF9_FGFR2	FGF9 - FGFR2	FGF	Secreted Signaling	PMC: 4393358	NL	-0.0661373	22.3865	26.2091	2.61903e-08	-0.321358	31.2653	42.0953	1.19142e-36
208	Layer_2-4_ExN	oRG	FGF9	FGFR2	3.78966e-07	0	FGF9_FGFR2	FGF9 - FGFR2	FGF	Secreted Signaling	PMC: 4393358	NL	-0.0661373	22.3865	26.2091	2.61903e-08	-1.04524	59.7673	72.3825	1.81219e-97
209	Layer_2-4_ExN	vRG	FGF9	FGFR2	6.86708e-07	0	FGF9_FGFR2	FGF9 - FGFR2	FGF	Secreted Signaling	PMC: 4393358	NL	-0.0661373	22.3865	26.2091	2.61903e-08	-1.2957	74.8988	82.4689	4.40906e-15
210	Layer_2-4_ExN	Cycling_progenitors	FGF9	FGFR2	2.71744e-07	0	FGF9_FGFR2	FGF9 - FGFR2	FGF	Secreted Signaling	PMC: 4393358	NL	-0.0661373	22.3865	26.2091	2.61903e-08	-0.380715	50.233	54.7778	0.00111124
211	Layer_2-4_ExN	IP_IN	FGF9	FGFR2	6.78e-08	0	FGF9_FGFR2	FGF9 - FGFR2	FGF	Secreted Signaling	PMC: 4393358	NL	-0.0661373	22.3865	26.2091	2.61903e-08	-0.270184	25	42.4174	0.0011517
212	Smooth_muscle_2	OPC_1	PDGFB	PDGFRA	1.25616e-05	0	PDGFB_PDGFRA	PDGFB - PDGFRA	PDGF	Secreted Signaling	PMID: 15207812	NL	-2.3913	45.8333	76.5823	6.91661e-13	NA	NA	NA	NA
213	Smooth_muscle_2	vRG	PDGFB	PDGFRB	1.00045e-06	0	PDGFB_PDGFRB	PDGFB - PDGFRB	PDGF	Secreted Signaling	PMID: 15207812	NL	-2.3913	45.8333	76.5823	6.91661e-13	-0.144666	18.6235	26.556	4.23513e-05
214	Smooth_muscle_2	Smooth_muscle_2	PDGFB	PDGFRB	9.3073e-06	0	PDGFB_PDGFRB	PDGFB - PDGFRB	PDGF	Secreted Signaling	PMID: 15207812	NL	-2.3913	45.8333	76.5823	6.91661e-13	-2.99367	37.5	49.3671	0.00286699
215	Smooth_muscle_2	Smooth_muscle_1	PDGFB	PDGFRB	2.05342e-05	0	PDGFB_PDGFRB	PDGFB - PDGFRB	PDGF	Secreted Signaling	PMID: 15207812	NL	-2.3913	45.8333	76.5823	6.91661e-13	-2.27152	66.3866	83.7209	0.000846434
216	Astrocyte_progenitors	OPC_1	PDGFC	PDGFRA	1.04542e-06	0	PDGFC_PDGFRA	PDGFC - PDGFRA	PDGF	Secreted Signaling	PMID: 15207812	NL	-0.257467	24.628	32.9577	4.20142e-06	NA	NA	NA	NA
217	Layer_4-6_ExN	OPC_1	PDGFC	PDGFRA	2.14093e-06	0	PDGFC_PDGFRA	PDGFC - PDGFRA	PDGF	Secreted Signaling	PMID: 15207812	NL	-0.235403	42.766	45.1305	0.000180073	NA	NA	NA	NA
218	Layer_5-6_ExN	OPC_1	PDGFC	PDGFRA	4.2812e-06	0	PDGFC_PDGFRA	PDGFC - PDGFRA	PDGF	Secreted Signaling	PMID: 15207812	NL	-0.273555	49.1104	56.0689	2.36397e-08	NA	NA	NA	NA
219	Smooth_muscle_2	OPC_1	PDGFC	PDGFRA	2.08369e-06	0	PDGFC_PDGFRA	PDGFC - PDGFRA	PDGF	Secreted Signaling	PMID: 15207812	NL	-1.01732	17.3611	47.4684	1.75604e-08	NA	NA	NA	NA
220	OPC_1	OPC_1	PDGFC	PDGFRA	1.03791e-06	0	PDGFC_PDGFRA	PDGFC - PDGFRA	PDGF	Secreted Signaling	PMID: 15207812	NL	-0.213409	21.7069	30.6273	0.00406261	NA	NA	NA	NA
221	Astrocyte_progenitors	vRG	PDGFD	PDGFRB	6.10445e-08	0	PDGFD_PDGFRB	PDGFD - PDGFRB	PDGF	Secreted Signaling	PMID: 15207812	NL	-0.214455	19.122	30.5164	1.07577e-08	-0.144666	18.6235	26.556	4.23513e-05
222	Interneuron_2	vRG	PDGFD	PDGFRB	1.81398e-07	0	PDGFD_PDGFRB	PDGFD - PDGFRB	PDGF	Secreted Signaling	PMID: 15207812	NL	-1.39056	10.539	48.6137	8.77154e-210	-0.144666	18.6235	26.556	4.23513e-05
223	IP	vRG	PDGFD	PDGFRB	8.6723e-08	0	PDGFD_PDGFRB	PDGFD - PDGFRB	PDGF	Secreted Signaling	PMID: 15207812	NL	-0.410959	20.9927	34.059	6.84271e-57	-0.144666	18.6235	26.556	4.23513e-05
224	oRG	vRG	PDGFD	PDGFRB	4.60374e-07	0	PDGFD_PDGFRB	PDGFD - PDGFRB	PDGF	Secreted Signaling	PMID: 15207812	NL	-0.534698	65.079	72.966	1.46672e-16	-0.144666	18.6235	26.556	4.23513e-05
225	vRG	vRG	PDGFD	PDGFRB	9.12806e-07	0	PDGFD_PDGFRB	PDGFD - PDGFRB	PDGF	Secreted Signaling	PMID: 15207812	NL	-0.702115	78.3401	84.4398	7.39899e-05	-0.144666	18.6235	26.556	4.23513e-05
226	Interneuron_1	vRG	PDGFD	PDGFRB	8.83187e-08	0	PDGFD_PDGFRB	PDGFD - PDGFRB	PDGF	Secreted Signaling	PMID: 15207812	NL	-1.00922	3.84331	36.2131	1.62391e-114	-0.144666	18.6235	26.556	4.23513e-05
227	Cycling_progenitors	vRG	PDGFD	PDGFRB	3.4879e-07	0	PDGFD_PDGFRB	PDGFD - PDGFRB	PDGF	Secreted Signaling	PMID: 15207812	NL	-0.529511	42.4045	56.1667	3.692e-11	-0.144666	18.6235	26.556	4.23513e-05
228	IP_IN	vRG	PDGFD	PDGFRB	6.22472e-07	0	PDGFD_PDGFRB	PDGFD - PDGFRB	PDGF	Secreted Signaling	PMID: 15207812	NL	-1.49784	32.3171	73.8739	3.44277e-20	-0.144666	18.6235	26.556	4.23513e-05
229	Astrocyte_progenitors	Smooth_muscle_2	PDGFD	PDGFRB	5.67909e-07	0	PDGFD_PDGFRB	PDGFD - PDGFRB	PDGF	Secreted Signaling	PMID: 15207812	NL	-0.214455	19.122	30.5164	1.07577e-08	-2.99367	37.5	49.3671	0.00286699
230	Interneuron_2	Smooth_muscle_2	PDGFD	PDGFRB	1.68758e-06	0	PDGFD_PDGFRB	PDGFD - PDGFRB	PDGF	Secreted Signaling	PMID: 15207812	NL	-1.39056	10.539	48.6137	8.77154e-210	-2.99367	37.5	49.3671	0.00286699
231	IP	Smooth_muscle_2	PDGFD	PDGFRB	8.06801e-07	0	PDGFD_PDGFRB	PDGFD - PDGFRB	PDGF	Secreted Signaling	PMID: 15207812	NL	-0.410959	20.9927	34.059	6.84271e-57	-2.99367	37.5	49.3671	0.00286699
232	oRG	Smooth_muscle_2	PDGFD	PDGFRB	4.28294e-06	0	PDGFD_PDGFRB	PDGFD - PDGFRB	PDGF	Secreted Signaling	PMID: 15207812	NL	-0.534698	65.079	72.966	1.46672e-16	-2.99367	37.5	49.3671	0.00286699
233	vRG	Smooth_muscle_2	PDGFD	PDGFRB	8.49195e-06	0	PDGFD_PDGFRB	PDGFD - PDGFRB	PDGF	Secreted Signaling	PMID: 15207812	NL	-0.702115	78.3401	84.4398	7.39899e-05	-2.99367	37.5	49.3671	0.00286699
234	Interneuron_1	Smooth_muscle_2	PDGFD	PDGFRB	8.21646e-07	0	PDGFD_PDGFRB	PDGFD - PDGFRB	PDGF	Secreted Signaling	PMID: 15207812	NL	-1.00922	3.84331	36.2131	1.62391e-114	-2.99367	37.5	49.3671	0.00286699
235	Cycling_progenitors	Smooth_muscle_2	PDGFD	PDGFRB	3.24485e-06	0	PDGFD_PDGFRB	PDGFD - PDGFRB	PDGF	Secreted Signaling	PMID: 15207812	NL	-0.529511	42.4045	56.1667	3.692e-11	-2.99367	37.5	49.3671	0.00286699
236	IP_IN	Smooth_muscle_2	PDGFD	PDGFRB	5.79095e-06	0	PDGFD_PDGFRB	PDGFD - PDGFRB	PDGF	Secreted Signaling	PMID: 15207812	NL	-1.49784	32.3171	73.8739	3.44277e-20	-2.99367	37.5	49.3671	0.00286699
237	Astrocyte_progenitors	Smooth_muscle_1	PDGFD	PDGFRB	1.25296e-06	0	PDGFD_PDGFRB	PDGFD - PDGFRB	PDGF	Secreted Signaling	PMID: 15207812	NL	-0.214455	19.122	30.5164	1.07577e-08	-2.27152	66.3866	83.7209	0.000846434
238	Interneuron_2	Smooth_muscle_1	PDGFD	PDGFRB	3.72326e-06	0	PDGFD_PDGFRB	PDGFD - PDGFRB	PDGF	Secreted Signaling	PMID: 15207812	NL	-1.39056	10.539	48.6137	8.77154e-210	-2.27152	66.3866	83.7209	0.000846434
239	IP	Smooth_muscle_1	PDGFD	PDGFRB	1.78002e-06	0	PDGFD_PDGFRB	PDGFD - PDGFRB	PDGF	Secreted Signaling	PMID: 15207812	NL	-0.410959	20.9927	34.059	6.84271e-57	-2.27152	66.3866	83.7209	0.000846434
240	oRG	Smooth_muscle_1	PDGFD	PDGFRB	9.44927e-06	0	PDGFD_PDGFRB	PDGFD - PDGFRB	PDGF	Secreted Signaling	PMID: 15207812	NL	-0.534698	65.079	72.966	1.46672e-16	-2.27152	66.3866	83.7209	0.000846434
241	vRG	Smooth_muscle_1	PDGFD	PDGFRB	1.87354e-05	0	PDGFD_PDGFRB	PDGFD - PDGFRB	PDGF	Secreted Signaling	PMID: 15207812	NL	-0.702115	78.3401	84.4398	7.39899e-05	-2.27152	66.3866	83.7209	0.000846434
242	Interneuron_1	Smooth_muscle_1	PDGFD	PDGFRB	1.81277e-06	0	PDGFD_PDGFRB	PDGFD - PDGFRB	PDGF	Secreted Signaling	PMID: 15207812	NL	-1.00922	3.84331	36.2131	1.62391e-114	-2.27152	66.3866	83.7209	0.000846434
243	Cycling_progenitors	Smooth_muscle_1	PDGFD	PDGFRB	7.159e-06	0	PDGFD_PDGFRB	PDGFD - PDGFRB	PDGF	Secreted Signaling	PMID: 15207812	NL	-0.529511	42.4045	56.1667	3.692e-11	-2.27152	66.3866	83.7209	0.000846434
244	IP_IN	Smooth_muscle_1	PDGFD	PDGFRB	1.27763e-05	0	PDGFD_PDGFRB	PDGFD - PDGFRB	PDGF	Secreted Signaling	PMID: 15207812	NL	-1.49784	32.3171	73.8739	3.44277e-20	-2.27152	66.3866	83.7209	0.000846434
245	Smooth_muscle_2	Smooth_muscle_2	VEGFC	FLT4	3.86699e-07	0	VEGFC_VEGFR3	VEGFC - VEGFR3	VEGF	Secreted Signaling	KEGG: hsa04370; PMID: 16633338	NL	-1.10646	18.75	41.7722	1.23112e-05	-0.773171	38.1944	58.2278	2.07101e-06
246	Smooth_muscle_2	Smooth_muscle_2	VEGFC	KDR	1.8569e-06	0	VEGFC_VEGFR2	VEGFC - VEGFR2	VEGF	Secreted Signaling	KEGG: hsa04370; PMID: 16633338	NL	-1.10646	18.75	41.7722	1.23112e-05	-3.52586	67.3611	83.5443	1.46867e-08
247	Smooth_muscle_2	Smooth_muscle_2	PGF	FLT1	1.18068e-05	0	PGF_VEGFR1	PGF - VEGFR1	VEGF	Secreted Signaling	KEGG: hsa04370; PMID: 16633338	NL	-1.38207	22.9167	46.2025	9.13253e-07	-14.0085	85.4167	92.4051	2.93844e-09
248	Smooth_muscle_2	Smooth_muscle_1	PGF	FLT1	1.91227e-07	0	PGF_VEGFR1	PGF - VEGFR1	VEGF	Secreted Signaling	KEGG: hsa04370; PMID: 16633338	NL	-1.38207	22.9167	46.2025	9.13253e-07	NA	NA	NA	NA
249	Smooth_muscle_2	Smooth_muscle_2	VEGFC	FLT4_KDR	8.50005e-07	0	VEGFC_VEGFR2R3	VEGFC - VEGFR2R3	VEGF	Secreted Signaling	PMID: 16633338	NL	-1.10646	18.75	41.7722	1.23112e-05	-2.14952	52.7778	70.8861	1.04285e-06
250	Smooth_muscle_2	Smooth_muscle_2	APLN	APLNR	3.17701e-06	0	APLN_APLNR	APLN - APLNR	APELIN	Secreted Signaling	KEGG: hsa04371	NL	-2.21857	34.7222	60.7595	8.98562e-08	-1.68917	35.4167	50	0.000140984
251	Smooth_muscle_2	Microglia_1	CX3CL1	CX3CR1	3.99991e-07	0	CX3CL1_CX3CR1	CX3CL1 - CX3CR1	CX3C	Secreted Signaling	KEGG: hsa04060	NL	-0.270105	12.5	27.8481	0.00114676	0.112545	70.5628	60.0985	0.0393169
252	Smooth_muscle_2	Smooth_muscle_2	TNFSF10	TNFRSF10A	9.73492e-08	0	TNFSF10_TNFRSF10B	TNFSF10 - TNFRSF10B	TRAIL	Secreted Signaling	KEGG: hsa04060	NL	-0.617287	18.75	37.9747	0.000124223	-0.503661	10.4167	37.9747	2.53736e-08
253	Smooth_muscle_2	Smooth_muscle_2	NAMPT	ITGA5_ITGB1	1.41135e-05	0	NAMPT_ITGA5_ITGB1	NAMPT - (ITGA5+ITGB1)	VISFATIN	Secreted Signaling	PMID: 28490838	NL	-3.49688	53.4722	75.3165	1.83471e-10	-3.11462	53.4722	77.2152	7.65558e-11
254	Smooth_muscle_2	Smooth_muscle_2	ANGPTL4	ITGA5_ITGB1	1.80907e-06	0	ANGPTL4_ITGA5_ITGB1	ANGPTL4 - (ITGA5+ITGB1)	ANGPTL	Secreted Signaling	PMID: 30049845	NL	-0.827228	22.2222	42.4051	2.55672e-05	-3.11462	53.4722	77.2152	7.65558e-11
255	Smooth_muscle_2	Smooth_muscle_2	ANGPTL4	CDH5	1.79694e-06	0	ANGPTL4_CDH5	ANGPTL4 - CDH5	ANGPTL	Secreted Signaling	PMID: 30049845	NL	-0.827228	22.2222	42.4051	2.55672e-05	-2.57307	50	77.2152	2.07049e-11
256	Smooth_muscle_2	Mig_Layer_2-3_ExN	ANGPTL4	CDH11	1.60036e-07	0	ANGPTL4_CDH11	ANGPTL4 - CDH11	ANGPTL	Secreted Signaling	PMID: 30049845	NL	-0.827228	22.2222	42.4051	2.55672e-05	NA	NA	NA	NA
257	Smooth_muscle_2	Layer_2-4_ExN	ANGPTL4	CDH11	7.95895e-07	0	ANGPTL4_CDH11	ANGPTL4 - CDH11	ANGPTL	Secreted Signaling	PMID: 30049845	NL	-0.827228	22.2222	42.4051	2.55672e-05	0.277656	75.484	65.0708	1.80259e-19
258	Smooth_muscle_2	Mig_Layer_2-4_ExN	ANGPTL4	CDH11	8.5921e-07	0	ANGPTL4_CDH11	ANGPTL4 - CDH11	ANGPTL	Secreted Signaling	PMID: 30049845	NL	-0.827228	22.2222	42.4051	2.55672e-05	0.621914	77.6425	61.6502	1.91616e-44
259	Smooth_muscle_2	Layer_4-6_ExN	ANGPTL4	CDH11	6.31532e-07	0	ANGPTL4_CDH11	ANGPTL4 - CDH11	ANGPTL	Secreted Signaling	PMID: 30049845	NL	-0.827228	22.2222	42.4051	2.55672e-05	0.712939	67.234	51.0842	1.43355e-35
260	Smooth_muscle_2	Layer_5-6_ExN	ANGPTL4	CDH11	6.16203e-07	0	ANGPTL4_CDH11	ANGPTL4 - CDH11	ANGPTL	Secreted Signaling	PMID: 30049845	NL	-0.827228	22.2222	42.4051	2.55672e-05	0.443557	64.5399	51.5952	2.89174e-21
261	Smooth_muscle_2	Smooth_muscle_2	ANGPTL4	CDH11	4.49656e-06	0	ANGPTL4_CDH11	ANGPTL4 - CDH11	ANGPTL	Secreted Signaling	PMID: 30049845	NL	-0.827228	22.2222	42.4051	2.55672e-05	-4.80596	79.8611	82.9114	1.7785e-05
262	Smooth_muscle_2	OPC_1	ANGPTL4	CDH11	1.51499e-07	0	ANGPTL4_CDH11	ANGPTL4 - CDH11	ANGPTL	Secreted Signaling	PMID: 30049845	NL	-0.827228	22.2222	42.4051	2.55672e-05	0.160728	46.9388	36.5314	0.00118493
263	Smooth_muscle_2	Interneuron_4	ANGPTL4	CDH11	1.45533e-07	0	ANGPTL4_CDH11	ANGPTL4 - CDH11	ANGPTL	Secreted Signaling	PMID: 30049845	NL	-0.827228	22.2222	42.4051	2.55672e-05	0.807591	50.4202	30.137	0.00434832
264	Smooth_muscle_2	Smooth_muscle_1	ANGPTL4	CDH11	2.1556e-06	0	ANGPTL4_CDH11	ANGPTL4 - CDH11	ANGPTL	Secreted Signaling	PMID: 30049845	NL	-0.827228	22.2222	42.4051	2.55672e-05	-1.37065	67.2269	90.6977	0.000742578
265	Smooth_muscle_2	Layer_4-5_ExN	ANGPTL4	CDH11	2.91121e-07	0	ANGPTL4_CDH11	ANGPTL4 - CDH11	ANGPTL	Secreted Signaling	PMID: 30049845	NL	-0.827228	22.2222	42.4051	2.55672e-05	1.05845	73.0927	43.5845	3.82761e-30
266	Smooth_muscle_2	Interneuron_M2	ANGPTL4	CDH11	1.70278e-07	0	ANGPTL4_CDH11	ANGPTL4 - CDH11	ANGPTL	Secreted Signaling	PMID: 30049845	NL	-0.827228	22.2222	42.4051	2.55672e-05	1.64211	75.3472	38.3212	3.62993e-74
267	Smooth_muscle_2	Interneuron_S1	ANGPTL4	CDH11	1.48694e-07	0	ANGPTL4_CDH11	ANGPTL4 - CDH11	ANGPTL	Secreted Signaling	PMID: 30049845	NL	-0.827228	22.2222	42.4051	2.55672e-05	0.398216	38.2488	29.1028	4.28023e-05
268	Smooth_muscle_2	Interneuron_M1	ANGPTL4	CDH11	6.55009e-07	0	ANGPTL4_CDH11	ANGPTL4 - CDH11	ANGPTL	Secreted Signaling	PMID: 30049845	NL	-0.827228	22.2222	42.4051	2.55672e-05	0.949245	77.8037	56.4315	1.63617e-37
269	Smooth_muscle_2	Interneuron_S2	ANGPTL4	CDH11	2.60116e-07	0	ANGPTL4_CDH11	ANGPTL4 - CDH11	ANGPTL	Secreted Signaling	PMID: 30049845	NL	-0.827228	22.2222	42.4051	2.55672e-05	0.580091	52.193	43.7333	2.83947e-06
270	Smooth_muscle_2	Astrocyte_progenitors	ANGPTL4	SDC2	1.73195e-07	0	ANGPTL4_SDC2	ANGPTL4 - SDC2	ANGPTL	Secreted Signaling	PMID: 29017031	NL	-0.827228	22.2222	42.4051	2.55672e-05	-0.457087	20.6101	39.9061	5.8311e-22
271	Smooth_muscle_2	vRG	ANGPTL4	SDC2	3.7208e-08	0	ANGPTL4_SDC2	ANGPTL4 - SDC2	ANGPTL	Secreted Signaling	PMID: 29017031	NL	-0.827228	22.2222	42.4051	2.55672e-05	-0.130331	19.6356	25	0.00681659
272	Smooth_muscle_2	Layer_2-4_ExN	ANGPTL4	SDC3	1.40841e-07	0	ANGPTL4_SDC3	ANGPTL4 - SDC3	ANGPTL	Secreted Signaling	PMID: 29017031	NL	-0.827228	22.2222	42.4051	2.55672e-05	-0.159239	15.4875	26.5511	1.73003e-55
273	Smooth_muscle_2	Smooth_muscle_2	ANGPTL4	SDC3	8.51672e-07	0	ANGPTL4_SDC3	ANGPTL4 - SDC3	ANGPTL	Secreted Signaling	PMID: 29017031	NL	-0.827228	22.2222	42.4051	2.55672e-05	-1.77289	28.4722	60.7595	1.0844e-11
274	Smooth_muscle_2	OPC_1	ANGPTL4	SDC3	1.29682e-07	0	ANGPTL4_SDC3	ANGPTL4 - SDC3	ANGPTL	Secreted Signaling	PMID: 29017031	NL	-0.827228	22.2222	42.4051	2.55672e-05	NA	NA	NA	NA
275	Smooth_muscle_2	Smooth_muscle_2	ANGPT2	TEK	2.09469e-05	0	ANGPT2_TEK	ANGPT2 - TEK	ANGPT	Secreted Signaling	PMID: 20651738	NL	-7.60896	44.4444	75.9494	9.79422e-11	-2.37798	63.1944	79.7468	1.4343e-06
276	Smooth_muscle_1	Smooth_muscle_2	ANGPT2	TEK	1.35162e-06	0	ANGPT2_TEK	ANGPT2 - TEK	ANGPT	Secreted Signaling	PMID: 20651738	NL	-0.353313	16.8067	34.8837	0.0160414	-2.37798	63.1944	79.7468	1.4343e-06
277	Smooth_muscle_2	Smooth_muscle_2	ANGPT2	ITGA5_ITGB1	1.41814e-05	0	ANGPT2_ITGA5_ITGB1	ANGPT2 - (ITGA5+ITGB1)	ANGPT	Secreted Signaling	PMID: 20651738; PMID: 25635707	NL	-7.60896	44.4444	75.9494	9.79422e-11	-3.11462	53.4722	77.2152	7.65558e-11
278	Smooth_muscle_1	Smooth_muscle_2	ANGPT2	ITGA5_ITGB1	9.1506e-07	0	ANGPT2_ITGA5_ITGB1	ANGPT2 - (ITGA5+ITGB1)	ANGPT	Secreted Signaling	PMID: 20651738; PMID: 25635707	NL	-0.353313	16.8067	34.8837	0.0160414	-3.11462	53.4722	77.2152	7.65558e-11
279	Mig_Layer_2-3_ExN	Astrocyte_progenitors	MDK	SDC2	1.26847e-08	0	MDK_SDC2	MDK - SDC2	MK	Secreted Signaling	PMID: 28356350	NL	-0.0746085	16.3898	25.4266	2.72766e-95	-0.457087	20.6101	39.9061	5.8311e-22
280	IP	Astrocyte_progenitors	MDK	SDC2	5.85009e-08	0	MDK_SDC2	MDK - SDC2	MK	Secreted Signaling	PMID: 28356350	NL	-0.291885	20.4638	35.9293	3.36439e-83	-0.457087	20.6101	39.9061	5.8311e-22
281	oRG	Astrocyte_progenitors	MDK	SDC2	4.88662e-08	0	MDK_SDC2	MDK - SDC2	MK	Secreted Signaling	PMID: 28356350	NL	-0.297069	22.8929	36.2885	3.63171e-54	-0.457087	20.6101	39.9061	5.8311e-22
282	vRG	Astrocyte_progenitors	MDK	SDC2	4.8014e-08	0	MDK_SDC2	MDK - SDC2	MK	Secreted Signaling	PMID: 28356350	NL	-0.28137	20.2429	34.751	7.89339e-13	-0.457087	20.6101	39.9061	5.8311e-22
283	Cycling_progenitors	Astrocyte_progenitors	MDK	SDC2	4.46665e-08	0	MDK_SDC2	MDK - SDC2	MK	Secreted Signaling	PMID: 28356350	NL	-0.298664	18.3597	35	6.43088e-22	-0.457087	20.6101	39.9061	5.8311e-22
284	Mig_Layer_2-3_ExN	vRG	MDK	SDC2	2.7251e-09	0	MDK_SDC2	MDK - SDC2	MK	Secreted Signaling	PMID: 28356350	NL	-0.0746085	16.3898	25.4266	2.72766e-95	-0.130331	19.6356	25	0.00681659
285	IP	vRG	MDK	SDC2	1.2568e-08	0	MDK_SDC2	MDK - SDC2	MK	Secreted Signaling	PMID: 28356350	NL	-0.291885	20.4638	35.9293	3.36439e-83	-0.130331	19.6356	25	0.00681659
286	oRG	vRG	MDK	SDC2	1.04981e-08	0	MDK_SDC2	MDK - SDC2	MK	Secreted Signaling	PMID: 28356350	NL	-0.297069	22.8929	36.2885	3.63171e-54	-0.130331	19.6356	25	0.00681659
287	vRG	vRG	MDK	SDC2	1.0315e-08	0	MDK_SDC2	MDK - SDC2	MK	Secreted Signaling	PMID: 28356350	NL	-0.28137	20.2429	34.751	7.89339e-13	-0.130331	19.6356	25	0.00681659
288	Cycling_progenitors	vRG	MDK	SDC2	9.59587e-09	0	MDK_SDC2	MDK - SDC2	MK	Secreted Signaling	PMID: 28356350	NL	-0.298664	18.3597	35	6.43088e-22	-0.130331	19.6356	25	0.00681659
289	Mig_Layer_2-3_ExN	Mig_Layer_2-3_ExN	MDK	PTPRZ1	4.79537e-08	0	MDK_PTPRZ1	MDK - PTPRZ1	MK	Secreted Signaling	PMID: 28356350	NL	-0.0746085	16.3898	25.4266	2.72766e-95	0.0711575	72.4528	69.0939	1.98278e-08
290	IP	Mig_Layer_2-3_ExN	MDK	PTPRZ1	2.21159e-07	0	MDK_PTPRZ1	MDK - PTPRZ1	MK	Secreted Signaling	PMID: 28356350	NL	-0.291885	20.4638	35.9293	3.36439e-83	0.0711575	72.4528	69.0939	1.98278e-08
291	oRG	Mig_Layer_2-3_ExN	MDK	PTPRZ1	1.84735e-07	0	MDK_PTPRZ1	MDK - PTPRZ1	MK	Secreted Signaling	PMID: 28356350	NL	-0.297069	22.8929	36.2885	3.63171e-54	0.0711575	72.4528	69.0939	1.98278e-08
292	vRG	Mig_Layer_2-3_ExN	MDK	PTPRZ1	1.81514e-07	0	MDK_PTPRZ1	MDK - PTPRZ1	MK	Secreted Signaling	PMID: 28356350	NL	-0.28137	20.2429	34.751	7.89339e-13	0.0711575	72.4528	69.0939	1.98278e-08
293	Cycling_progenitors	Mig_Layer_2-3_ExN	MDK	PTPRZ1	1.68859e-07	0	MDK_PTPRZ1	MDK - PTPRZ1	MK	Secreted Signaling	PMID: 28356350	NL	-0.298664	18.3597	35	6.43088e-22	0.0711575	72.4528	69.0939	1.98278e-08
294	Mig_Layer_2-3_ExN	Layer_2-4_ExN	MDK	PTPRZ1	1.42957e-07	0	MDK_PTPRZ1	MDK - PTPRZ1	MK	Secreted Signaling	PMID: 28356350	NL	-0.0746085	16.3898	25.4266	2.72766e-95	NA	NA	NA	NA
295	IP	Layer_2-4_ExN	MDK	PTPRZ1	6.59306e-07	0	MDK_PTPRZ1	MDK - PTPRZ1	MK	Secreted Signaling	PMID: 28356350	NL	-0.291885	20.4638	35.9293	3.36439e-83	NA	NA	NA	NA
296	oRG	Layer_2-4_ExN	MDK	PTPRZ1	5.50724e-07	0	MDK_PTPRZ1	MDK - PTPRZ1	MK	Secreted Signaling	PMID: 28356350	NL	-0.297069	22.8929	36.2885	3.63171e-54	NA	NA	NA	NA
297	vRG	Layer_2-4_ExN	MDK	PTPRZ1	5.41119e-07	0	MDK_PTPRZ1	MDK - PTPRZ1	MK	Secreted Signaling	PMID: 28356350	NL	-0.28137	20.2429	34.751	7.89339e-13	NA	NA	NA	NA
298	Cycling_progenitors	Layer_2-4_ExN	MDK	PTPRZ1	5.03393e-07	0	MDK_PTPRZ1	MDK - PTPRZ1	MK	Secreted Signaling	PMID: 28356350	NL	-0.298664	18.3597	35	6.43088e-22	NA	NA	NA	NA
299	Mig_Layer_2-3_ExN	Astrocyte_progenitors	MDK	PTPRZ1	1.61108e-07	0	MDK_PTPRZ1	MDK - PTPRZ1	MK	Secreted Signaling	PMID: 28356350	NL	-0.0746085	16.3898	25.4266	2.72766e-95	3.78259	94.0476	86.1033	5.7735e-58
300	IP	Astrocyte_progenitors	MDK	PTPRZ1	7.43015e-07	0	MDK_PTPRZ1	MDK - PTPRZ1	MK	Secreted Signaling	PMID: 28356350	NL	-0.291885	20.4638	35.9293	3.36439e-83	3.78259	94.0476	86.1033	5.7735e-58
301	oRG	Astrocyte_progenitors	MDK	PTPRZ1	6.20646e-07	0	MDK_PTPRZ1	MDK - PTPRZ1	MK	Secreted Signaling	PMID: 28356350	NL	-0.297069	22.8929	36.2885	3.63171e-54	3.78259	94.0476	86.1033	5.7735e-58
302	vRG	Astrocyte_progenitors	MDK	PTPRZ1	6.09822e-07	0	MDK_PTPRZ1	MDK - PTPRZ1	MK	Secreted Signaling	PMID: 28356350	NL	-0.28137	20.2429	34.751	7.89339e-13	3.78259	94.0476	86.1033	5.7735e-58
303	Cycling_progenitors	Astrocyte_progenitors	MDK	PTPRZ1	5.67306e-07	0	MDK_PTPRZ1	MDK - PTPRZ1	MK	Secreted Signaling	PMID: 28356350	NL	-0.298664	18.3597	35	6.43088e-22	3.78259	94.0476	86.1033	5.7735e-58
304	Mig_Layer_2-3_ExN	Mig_Layer_2-4_ExN	MDK	PTPRZ1	1.72114e-07	0	MDK_PTPRZ1	MDK - PTPRZ1	MK	Secreted Signaling	PMID: 28356350	NL	-0.0746085	16.3898	25.4266	2.72766e-95	-0.509433	90.2009	90.231	3.6217e-08
305	IP	Mig_Layer_2-4_ExN	MDK	PTPRZ1	7.93777e-07	0	MDK_PTPRZ1	MDK - PTPRZ1	MK	Secreted Signaling	PMID: 28356350	NL	-0.291885	20.4638	35.9293	3.36439e-83	-0.509433	90.2009	90.231	3.6217e-08
306	oRG	Mig_Layer_2-4_ExN	MDK	PTPRZ1	6.63048e-07	0	MDK_PTPRZ1	MDK - PTPRZ1	MK	Secreted Signaling	PMID: 28356350	NL	-0.297069	22.8929	36.2885	3.63171e-54	-0.509433	90.2009	90.231	3.6217e-08
307	vRG	Mig_Layer_2-4_ExN	MDK	PTPRZ1	6.51485e-07	0	MDK_PTPRZ1	MDK - PTPRZ1	MK	Secreted Signaling	PMID: 28356350	NL	-0.28137	20.2429	34.751	7.89339e-13	-0.509433	90.2009	90.231	3.6217e-08
308	Cycling_progenitors	Mig_Layer_2-4_ExN	MDK	PTPRZ1	6.06064e-07	0	MDK_PTPRZ1	MDK - PTPRZ1	MK	Secreted Signaling	PMID: 28356350	NL	-0.298664	18.3597	35	6.43088e-22	-0.509433	90.2009	90.231	3.6217e-08
309	Mig_Layer_2-3_ExN	IP	MDK	PTPRZ1	4.6989e-08	0	MDK_PTPRZ1	MDK - PTPRZ1	MK	Secreted Signaling	PMID: 28356350	NL	-0.0746085	16.3898	25.4266	2.72766e-95	-0.05817	68.8771	65.2542	0.00970199
310	IP	IP	MDK	PTPRZ1	2.1671e-07	0	MDK_PTPRZ1	MDK - PTPRZ1	MK	Secreted Signaling	PMID: 28356350	NL	-0.291885	20.4638	35.9293	3.36439e-83	-0.05817	68.8771	65.2542	0.00970199
311	oRG	IP	MDK	PTPRZ1	1.81019e-07	0	MDK_PTPRZ1	MDK - PTPRZ1	MK	Secreted Signaling	PMID: 28356350	NL	-0.297069	22.8929	36.2885	3.63171e-54	-0.05817	68.8771	65.2542	0.00970199
312	vRG	IP	MDK	PTPRZ1	1.77862e-07	0	MDK_PTPRZ1	MDK - PTPRZ1	MK	Secreted Signaling	PMID: 28356350	NL	-0.28137	20.2429	34.751	7.89339e-13	-0.05817	68.8771	65.2542	0.00970199
313	Cycling_progenitors	IP	MDK	PTPRZ1	1.65462e-07	0	MDK_PTPRZ1	MDK - PTPRZ1	MK	Secreted Signaling	PMID: 28356350	NL	-0.298664	18.3597	35	6.43088e-22	-0.05817	68.8771	65.2542	0.00970199
314	Mig_Layer_2-3_ExN	oRG	MDK	PTPRZ1	2.40535e-07	0	MDK_PTPRZ1	MDK - PTPRZ1	MK	Secreted Signaling	PMID: 28356350	NL	-0.0746085	16.3898	25.4266	2.72766e-95	NA	NA	NA	NA
315	IP	oRG	MDK	PTPRZ1	1.10933e-06	0	MDK_PTPRZ1	MDK - PTPRZ1	MK	Secreted Signaling	PMID: 28356350	NL	-0.291885	20.4638	35.9293	3.36439e-83	NA	NA	NA	NA
316	oRG	oRG	MDK	PTPRZ1	9.2663e-07	0	MDK_PTPRZ1	MDK - PTPRZ1	MK	Secreted Signaling	PMID: 28356350	NL	-0.297069	22.8929	36.2885	3.63171e-54	NA	NA	NA	NA
317	vRG	oRG	MDK	PTPRZ1	9.1047e-07	0	MDK_PTPRZ1	MDK - PTPRZ1	MK	Secreted Signaling	PMID: 28356350	NL	-0.28137	20.2429	34.751	7.89339e-13	NA	NA	NA	NA
318	Cycling_progenitors	oRG	MDK	PTPRZ1	8.46993e-07	0	MDK_PTPRZ1	MDK - PTPRZ1	MK	Secreted Signaling	PMID: 28356350	NL	-0.298664	18.3597	35	6.43088e-22	NA	NA	NA	NA
319	Mig_Layer_2-3_ExN	vRG	MDK	PTPRZ1	1.5198e-07	0	MDK_PTPRZ1	MDK - PTPRZ1	MK	Secreted Signaling	PMID: 28356350	NL	-0.0746085	16.3898	25.4266	2.72766e-95	-1.10562	86.5385	90.4564	1.75219e-05
320	IP	vRG	MDK	PTPRZ1	7.00919e-07	0	MDK_PTPRZ1	MDK - PTPRZ1	MK	Secreted Signaling	PMID: 28356350	NL	-0.291885	20.4638	35.9293	3.36439e-83	-1.10562	86.5385	90.4564	1.75219e-05
321	oRG	vRG	MDK	PTPRZ1	5.85483e-07	0	MDK_PTPRZ1	MDK - PTPRZ1	MK	Secreted Signaling	PMID: 28356350	NL	-0.297069	22.8929	36.2885	3.63171e-54	-1.10562	86.5385	90.4564	1.75219e-05
322	vRG	vRG	MDK	PTPRZ1	5.75273e-07	0	MDK_PTPRZ1	MDK - PTPRZ1	MK	Secreted Signaling	PMID: 28356350	NL	-0.28137	20.2429	34.751	7.89339e-13	-1.10562	86.5385	90.4564	1.75219e-05
323	Cycling_progenitors	vRG	MDK	PTPRZ1	5.35165e-07	0	MDK_PTPRZ1	MDK - PTPRZ1	MK	Secreted Signaling	PMID: 28356350	NL	-0.298664	18.3597	35	6.43088e-22	-1.10562	86.5385	90.4564	1.75219e-05
324	Mig_Layer_2-3_ExN	Interneuron_1	MDK	PTPRZ1	4.92126e-09	0	MDK_PTPRZ1	MDK - PTPRZ1	MK	Secreted Signaling	PMID: 28356350	NL	-0.0746085	16.3898	25.4266	2.72766e-95	NA	NA	NA	NA
325	IP	Interneuron_1	MDK	PTPRZ1	2.26965e-08	0	MDK_PTPRZ1	MDK - PTPRZ1	MK	Secreted Signaling	PMID: 28356350	NL	-0.291885	20.4638	35.9293	3.36439e-83	NA	NA	NA	NA
326	oRG	Interneuron_1	MDK	PTPRZ1	1.89585e-08	0	MDK_PTPRZ1	MDK - PTPRZ1	MK	Secreted Signaling	PMID: 28356350	NL	-0.297069	22.8929	36.2885	3.63171e-54	NA	NA	NA	NA
327	vRG	Interneuron_1	MDK	PTPRZ1	1.86279e-08	0.02	MDK_PTPRZ1	MDK - PTPRZ1	MK	Secreted Signaling	PMID: 28356350	NL	-0.28137	20.2429	34.751	7.89339e-13	NA	NA	NA	NA
328	Cycling_progenitors	Interneuron_1	MDK	PTPRZ1	1.73292e-08	0.01	MDK_PTPRZ1	MDK - PTPRZ1	MK	Secreted Signaling	PMID: 28356350	NL	-0.298664	18.3597	35	6.43088e-22	NA	NA	NA	NA
329	Mig_Layer_2-3_ExN	Cycling_progenitors	MDK	PTPRZ1	5.97431e-08	0	MDK_PTPRZ1	MDK - PTPRZ1	MK	Secreted Signaling	PMID: 28356350	NL	-0.0746085	16.3898	25.4266	2.72766e-95	0.967495	86.1137	70.0556	4.25222e-31
330	IP	Cycling_progenitors	MDK	PTPRZ1	2.7553e-07	0	MDK_PTPRZ1	MDK - PTPRZ1	MK	Secreted Signaling	PMID: 28356350	NL	-0.291885	20.4638	35.9293	3.36439e-83	0.967495	86.1137	70.0556	4.25222e-31
331	oRG	Cycling_progenitors	MDK	PTPRZ1	2.30153e-07	0	MDK_PTPRZ1	MDK - PTPRZ1	MK	Secreted Signaling	PMID: 28356350	NL	-0.297069	22.8929	36.2885	3.63171e-54	0.967495	86.1137	70.0556	4.25222e-31
332	vRG	Cycling_progenitors	MDK	PTPRZ1	2.26139e-07	0	MDK_PTPRZ1	MDK - PTPRZ1	MK	Secreted Signaling	PMID: 28356350	NL	-0.28137	20.2429	34.751	7.89339e-13	0.967495	86.1137	70.0556	4.25222e-31
333	Cycling_progenitors	Cycling_progenitors	MDK	PTPRZ1	2.10373e-07	0	MDK_PTPRZ1	MDK - PTPRZ1	MK	Secreted Signaling	PMID: 28356350	NL	-0.298664	18.3597	35	6.43088e-22	0.967495	86.1137	70.0556	4.25222e-31
334	Mig_Layer_2-3_ExN	Layer_4-6_ExN	MDK	PTPRZ1	1.34261e-07	0	MDK_PTPRZ1	MDK - PTPRZ1	MK	Secreted Signaling	PMID: 28356350	NL	-0.0746085	16.3898	25.4266	2.72766e-95	-0.682583	87.0479	83.5722	9.86661e-06
335	IP	Layer_4-6_ExN	MDK	PTPRZ1	6.19199e-07	0	MDK_PTPRZ1	MDK - PTPRZ1	MK	Secreted Signaling	PMID: 28356350	NL	-0.291885	20.4638	35.9293	3.36439e-83	-0.682583	87.0479	83.5722	9.86661e-06
336	oRG	Layer_4-6_ExN	MDK	PTPRZ1	5.17222e-07	0	MDK_PTPRZ1	MDK - PTPRZ1	MK	Secreted Signaling	PMID: 28356350	NL	-0.297069	22.8929	36.2885	3.63171e-54	-0.682583	87.0479	83.5722	9.86661e-06
337	vRG	Layer_4-6_ExN	MDK	PTPRZ1	5.08202e-07	0	MDK_PTPRZ1	MDK - PTPRZ1	MK	Secreted Signaling	PMID: 28356350	NL	-0.28137	20.2429	34.751	7.89339e-13	-0.682583	87.0479	83.5722	9.86661e-06
338	Cycling_progenitors	Layer_4-6_ExN	MDK	PTPRZ1	4.7277e-07	0	MDK_PTPRZ1	MDK - PTPRZ1	MK	Secreted Signaling	PMID: 28356350	NL	-0.298664	18.3597	35	6.43088e-22	-0.682583	87.0479	83.5722	9.86661e-06
339	Mig_Layer_2-3_ExN	Interneuron_3	MDK	PTPRZ1	6.08878e-09	0	MDK_PTPRZ1	MDK - PTPRZ1	MK	Secreted Signaling	PMID: 28356350	NL	-0.0746085	16.3898	25.4266	2.72766e-95	NA	NA	NA	NA
340	IP	Interneuron_3	MDK	PTPRZ1	2.8081e-08	0	MDK_PTPRZ1	MDK - PTPRZ1	MK	Secreted Signaling	PMID: 28356350	NL	-0.291885	20.4638	35.9293	3.36439e-83	NA	NA	NA	NA
341	oRG	Interneuron_3	MDK	PTPRZ1	2.34563e-08	0	MDK_PTPRZ1	MDK - PTPRZ1	MK	Secreted Signaling	PMID: 28356350	NL	-0.297069	22.8929	36.2885	3.63171e-54	NA	NA	NA	NA
342	vRG	Interneuron_3	MDK	PTPRZ1	2.30472e-08	0.02	MDK_PTPRZ1	MDK - PTPRZ1	MK	Secreted Signaling	PMID: 28356350	NL	-0.28137	20.2429	34.751	7.89339e-13	NA	NA	NA	NA
343	Cycling_progenitors	Interneuron_3	MDK	PTPRZ1	2.14404e-08	0.01	MDK_PTPRZ1	MDK - PTPRZ1	MK	Secreted Signaling	PMID: 28356350	NL	-0.298664	18.3597	35	6.43088e-22	NA	NA	NA	NA
344	Mig_Layer_2-3_ExN	Microglia_1	MDK	PTPRZ1	1.11087e-08	0	MDK_PTPRZ1	MDK - PTPRZ1	MK	Secreted Signaling	PMID: 28356350	NL	-0.0746085	16.3898	25.4266	2.72766e-95	NA	NA	NA	NA
345	IP	Microglia_1	MDK	PTPRZ1	5.12322e-08	0	MDK_PTPRZ1	MDK - PTPRZ1	MK	Secreted Signaling	PMID: 28356350	NL	-0.291885	20.4638	35.9293	3.36439e-83	NA	NA	NA	NA
346	oRG	Microglia_1	MDK	PTPRZ1	4.27947e-08	0	MDK_PTPRZ1	MDK - PTPRZ1	MK	Secreted Signaling	PMID: 28356350	NL	-0.297069	22.8929	36.2885	3.63171e-54	NA	NA	NA	NA
347	vRG	Microglia_1	MDK	PTPRZ1	4.20484e-08	0.02	MDK_PTPRZ1	MDK - PTPRZ1	MK	Secreted Signaling	PMID: 28356350	NL	-0.28137	20.2429	34.751	7.89339e-13	NA	NA	NA	NA
348	Cycling_progenitors	Microglia_1	MDK	PTPRZ1	3.91168e-08	0.01	MDK_PTPRZ1	MDK - PTPRZ1	MK	Secreted Signaling	PMID: 28356350	NL	-0.298664	18.3597	35	6.43088e-22	NA	NA	NA	NA
349	Mig_Layer_2-3_ExN	Layer_5-6_ExN	MDK	PTPRZ1	1.41872e-07	0	MDK_PTPRZ1	MDK - PTPRZ1	MK	Secreted Signaling	PMID: 28356350	NL	-0.0746085	16.3898	25.4266	2.72766e-95	-0.603811	86.8712	88.7789	5.32199e-10
350	IP	Layer_5-6_ExN	MDK	PTPRZ1	6.54302e-07	0	MDK_PTPRZ1	MDK - PTPRZ1	MK	Secreted Signaling	PMID: 28356350	NL	-0.291885	20.4638	35.9293	3.36439e-83	-0.603811	86.8712	88.7789	5.32199e-10
351	oRG	Layer_5-6_ExN	MDK	PTPRZ1	5.46544e-07	0	MDK_PTPRZ1	MDK - PTPRZ1	MK	Secreted Signaling	PMID: 28356350	NL	-0.297069	22.8929	36.2885	3.63171e-54	-0.603811	86.8712	88.7789	5.32199e-10
352	vRG	Layer_5-6_ExN	MDK	PTPRZ1	5.37012e-07	0	MDK_PTPRZ1	MDK - PTPRZ1	MK	Secreted Signaling	PMID: 28356350	NL	-0.28137	20.2429	34.751	7.89339e-13	-0.603811	86.8712	88.7789	5.32199e-10
353	Cycling_progenitors	Layer_5-6_ExN	MDK	PTPRZ1	4.99573e-07	0	MDK_PTPRZ1	MDK - PTPRZ1	MK	Secreted Signaling	PMID: 28356350	NL	-0.298664	18.3597	35	6.43088e-22	-0.603811	86.8712	88.7789	5.32199e-10
354	Mig_Layer_2-3_ExN	OPC_1	MDK	PTPRZ1	5.33099e-07	0	MDK_PTPRZ1	MDK - PTPRZ1	MK	Secreted Signaling	PMID: 28356350	NL	-0.0746085	16.3898	25.4266	2.72766e-95	-3.03465	99.0724	98.524	4.97845e-07
355	IP	OPC_1	MDK	PTPRZ1	2.45861e-06	0	MDK_PTPRZ1	MDK - PTPRZ1	MK	Secreted Signaling	PMID: 28356350	NL	-0.291885	20.4638	35.9293	3.36439e-83	-3.03465	99.0724	98.524	4.97845e-07
356	oRG	OPC_1	MDK	PTPRZ1	2.05369e-06	0	MDK_PTPRZ1	MDK - PTPRZ1	MK	Secreted Signaling	PMID: 28356350	NL	-0.297069	22.8929	36.2885	3.63171e-54	-3.03465	99.0724	98.524	4.97845e-07
357	vRG	OPC_1	MDK	PTPRZ1	2.01788e-06	0	MDK_PTPRZ1	MDK - PTPRZ1	MK	Secreted Signaling	PMID: 28356350	NL	-0.28137	20.2429	34.751	7.89339e-13	-3.03465	99.0724	98.524	4.97845e-07
358	Cycling_progenitors	OPC_1	MDK	PTPRZ1	1.87719e-06	0	MDK_PTPRZ1	MDK - PTPRZ1	MK	Secreted Signaling	PMID: 28356350	NL	-0.298664	18.3597	35	6.43088e-22	-3.03465	99.0724	98.524	4.97845e-07
359	Mig_Layer_2-3_ExN	OL	MDK	PTPRZ1	1.41583e-07	0	MDK_PTPRZ1	MDK - PTPRZ1	MK	Secreted Signaling	PMID: 28356350	NL	-0.0746085	16.3898	25.4266	2.72766e-95	NA	NA	NA	NA
360	IP	OL	MDK	PTPRZ1	6.52967e-07	0	MDK_PTPRZ1	MDK - PTPRZ1	MK	Secreted Signaling	PMID: 28356350	NL	-0.291885	20.4638	35.9293	3.36439e-83	NA	NA	NA	NA
361	oRG	OL	MDK	PTPRZ1	5.45429e-07	0	MDK_PTPRZ1	MDK - PTPRZ1	MK	Secreted Signaling	PMID: 28356350	NL	-0.297069	22.8929	36.2885	3.63171e-54	NA	NA	NA	NA
362	vRG	OL	MDK	PTPRZ1	5.35917e-07	0	MDK_PTPRZ1	MDK - PTPRZ1	MK	Secreted Signaling	PMID: 28356350	NL	-0.28137	20.2429	34.751	7.89339e-13	NA	NA	NA	NA
363	Cycling_progenitors	OL	MDK	PTPRZ1	4.98553e-07	0	MDK_PTPRZ1	MDK - PTPRZ1	MK	Secreted Signaling	PMID: 28356350	NL	-0.298664	18.3597	35	6.43088e-22	NA	NA	NA	NA
364	Mig_Layer_2-3_ExN	Interneuron_4	MDK	PTPRZ1	5.53657e-09	0	MDK_PTPRZ1	MDK - PTPRZ1	MK	Secreted Signaling	PMID: 28356350	NL	-0.0746085	16.3898	25.4266	2.72766e-95	NA	NA	NA	NA
365	IP	Interneuron_4	MDK	PTPRZ1	2.55342e-08	0	MDK_PTPRZ1	MDK - PTPRZ1	MK	Secreted Signaling	PMID: 28356350	NL	-0.291885	20.4638	35.9293	3.36439e-83	NA	NA	NA	NA
366	oRG	Interneuron_4	MDK	PTPRZ1	2.13289e-08	0	MDK_PTPRZ1	MDK - PTPRZ1	MK	Secreted Signaling	PMID: 28356350	NL	-0.297069	22.8929	36.2885	3.63171e-54	NA	NA	NA	NA
367	vRG	Interneuron_4	MDK	PTPRZ1	2.0957e-08	0.02	MDK_PTPRZ1	MDK - PTPRZ1	MK	Secreted Signaling	PMID: 28356350	NL	-0.28137	20.2429	34.751	7.89339e-13	NA	NA	NA	NA
368	Cycling_progenitors	Interneuron_4	MDK	PTPRZ1	1.94959e-08	0.01	MDK_PTPRZ1	MDK - PTPRZ1	MK	Secreted Signaling	PMID: 28356350	NL	-0.298664	18.3597	35	6.43088e-22	NA	NA	NA	NA
369	Mig_Layer_2-3_ExN	IP_IN	MDK	PTPRZ1	9.68616e-09	0	MDK_PTPRZ1	MDK - PTPRZ1	MK	Secreted Signaling	PMID: 28356350	NL	-0.0746085	16.3898	25.4266	2.72766e-95	0.134652	34.7561	31.006	0.00880493
370	IP	IP_IN	MDK	PTPRZ1	4.46718e-08	0	MDK_PTPRZ1	MDK - PTPRZ1	MK	Secreted Signaling	PMID: 28356350	NL	-0.291885	20.4638	35.9293	3.36439e-83	0.134652	34.7561	31.006	0.00880493
371	oRG	IP_IN	MDK	PTPRZ1	3.73147e-08	0	MDK_PTPRZ1	MDK - PTPRZ1	MK	Secreted Signaling	PMID: 28356350	NL	-0.297069	22.8929	36.2885	3.63171e-54	0.134652	34.7561	31.006	0.00880493
372	vRG	IP_IN	MDK	PTPRZ1	3.6664e-08	0.02	MDK_PTPRZ1	MDK - PTPRZ1	MK	Secreted Signaling	PMID: 28356350	NL	-0.28137	20.2429	34.751	7.89339e-13	0.134652	34.7561	31.006	0.00880493
373	Cycling_progenitors	IP_IN	MDK	PTPRZ1	3.41078e-08	0.01	MDK_PTPRZ1	MDK - PTPRZ1	MK	Secreted Signaling	PMID: 28356350	NL	-0.298664	18.3597	35	6.43088e-22	0.134652	34.7561	31.006	0.00880493
374	Mig_Layer_2-3_ExN	Smooth_muscle_1	MDK	PTPRZ1	1.89818e-08	0	MDK_PTPRZ1	MDK - PTPRZ1	MK	Secreted Signaling	PMID: 28356350	NL	-0.0746085	16.3898	25.4266	2.72766e-95	NA	NA	NA	NA
375	IP	Smooth_muscle_1	MDK	PTPRZ1	8.75427e-08	0	MDK_PTPRZ1	MDK - PTPRZ1	MK	Secreted Signaling	PMID: 28356350	NL	-0.291885	20.4638	35.9293	3.36439e-83	NA	NA	NA	NA
376	oRG	Smooth_muscle_1	MDK	PTPRZ1	7.31251e-08	0	MDK_PTPRZ1	MDK - PTPRZ1	MK	Secreted Signaling	PMID: 28356350	NL	-0.297069	22.8929	36.2885	3.63171e-54	NA	NA	NA	NA
377	vRG	Smooth_muscle_1	MDK	PTPRZ1	7.18498e-08	0.01	MDK_PTPRZ1	MDK - PTPRZ1	MK	Secreted Signaling	PMID: 28356350	NL	-0.28137	20.2429	34.751	7.89339e-13	NA	NA	NA	NA
378	Cycling_progenitors	Smooth_muscle_1	MDK	PTPRZ1	6.68405e-08	0	MDK_PTPRZ1	MDK - PTPRZ1	MK	Secreted Signaling	PMID: 28356350	NL	-0.298664	18.3597	35	6.43088e-22	NA	NA	NA	NA
379	Mig_Layer_2-3_ExN	Layer_4-5_ExN	MDK	PTPRZ1	1.67095e-07	0	MDK_PTPRZ1	MDK - PTPRZ1	MK	Secreted Signaling	PMID: 28356350	NL	-0.0746085	16.3898	25.4266	2.72766e-95	-1.33067	87.9409	90.224	3.05441e-05
380	IP	Layer_4-5_ExN	MDK	PTPRZ1	7.7063e-07	0	MDK_PTPRZ1	MDK - PTPRZ1	MK	Secreted Signaling	PMID: 28356350	NL	-0.291885	20.4638	35.9293	3.36439e-83	-1.33067	87.9409	90.224	3.05441e-05
381	oRG	Layer_4-5_ExN	MDK	PTPRZ1	6.43713e-07	0	MDK_PTPRZ1	MDK - PTPRZ1	MK	Secreted Signaling	PMID: 28356350	NL	-0.297069	22.8929	36.2885	3.63171e-54	-1.33067	87.9409	90.224	3.05441e-05
382	vRG	Layer_4-5_ExN	MDK	PTPRZ1	6.32487e-07	0	MDK_PTPRZ1	MDK - PTPRZ1	MK	Secreted Signaling	PMID: 28356350	NL	-0.28137	20.2429	34.751	7.89339e-13	-1.33067	87.9409	90.224	3.05441e-05
383	Cycling_progenitors	Layer_4-5_ExN	MDK	PTPRZ1	5.88391e-07	0	MDK_PTPRZ1	MDK - PTPRZ1	MK	Secreted Signaling	PMID: 28356350	NL	-0.298664	18.3597	35	6.43088e-22	-1.33067	87.9409	90.224	3.05441e-05
384	Mig_Layer_2-3_ExN	Interneuron_S1	MDK	PTPRZ1	7.70871e-09	0	MDK_PTPRZ1	MDK - PTPRZ1	MK	Secreted Signaling	PMID: 28356350	NL	-0.0746085	16.3898	25.4266	2.72766e-95	NA	NA	NA	NA
385	IP	Interneuron_S1	MDK	PTPRZ1	3.5552e-08	0	MDK_PTPRZ1	MDK - PTPRZ1	MK	Secreted Signaling	PMID: 28356350	NL	-0.291885	20.4638	35.9293	3.36439e-83	NA	NA	NA	NA
386	oRG	Interneuron_S1	MDK	PTPRZ1	2.96968e-08	0	MDK_PTPRZ1	MDK - PTPRZ1	MK	Secreted Signaling	PMID: 28356350	NL	-0.297069	22.8929	36.2885	3.63171e-54	NA	NA	NA	NA
387	vRG	Interneuron_S1	MDK	PTPRZ1	2.91789e-08	0.02	MDK_PTPRZ1	MDK - PTPRZ1	MK	Secreted Signaling	PMID: 28356350	NL	-0.28137	20.2429	34.751	7.89339e-13	NA	NA	NA	NA
388	Cycling_progenitors	Interneuron_S1	MDK	PTPRZ1	2.71446e-08	0.01	MDK_PTPRZ1	MDK - PTPRZ1	MK	Secreted Signaling	PMID: 28356350	NL	-0.298664	18.3597	35	6.43088e-22	NA	NA	NA	NA
389	Mig_Layer_2-3_ExN	Interneuron_S2	MDK	PTPRZ1	9.40282e-09	0	MDK_PTPRZ1	MDK - PTPRZ1	MK	Secreted Signaling	PMID: 28356350	NL	-0.0746085	16.3898	25.4266	2.72766e-95	NA	NA	NA	NA
390	IP	Interneuron_S2	MDK	PTPRZ1	4.33651e-08	0	MDK_PTPRZ1	MDK - PTPRZ1	MK	Secreted Signaling	PMID: 28356350	NL	-0.291885	20.4638	35.9293	3.36439e-83	NA	NA	NA	NA
391	oRG	Interneuron_S2	MDK	PTPRZ1	3.62232e-08	0	MDK_PTPRZ1	MDK - PTPRZ1	MK	Secreted Signaling	PMID: 28356350	NL	-0.297069	22.8929	36.2885	3.63171e-54	NA	NA	NA	NA
392	vRG	Interneuron_S2	MDK	PTPRZ1	3.55915e-08	0.02	MDK_PTPRZ1	MDK - PTPRZ1	MK	Secreted Signaling	PMID: 28356350	NL	-0.28137	20.2429	34.751	7.89339e-13	NA	NA	NA	NA
393	Cycling_progenitors	Interneuron_S2	MDK	PTPRZ1	3.31101e-08	0.01	MDK_PTPRZ1	MDK - PTPRZ1	MK	Secreted Signaling	PMID: 28356350	NL	-0.298664	18.3597	35	6.43088e-22	NA	NA	NA	NA
394	Mig_Layer_2-3_ExN	Smooth_muscle_2	MDK	ITGA4_ITGB1	5.77408e-08	0	MDK_ITGA4_ITGB1	MDK - (ITGA4+ITGB1)	MK	Secreted Signaling	PMID: 28356350	NL	-0.0746085	16.3898	25.4266	2.72766e-95	-2.44494	42.0139	58.2278	0.00190834
395	IP	Smooth_muscle_2	MDK	ITGA4_ITGB1	2.66296e-07	0	MDK_ITGA4_ITGB1	MDK - (ITGA4+ITGB1)	MK	Secreted Signaling	PMID: 28356350	NL	-0.291885	20.4638	35.9293	3.36439e-83	-2.44494	42.0139	58.2278	0.00190834
396	oRG	Smooth_muscle_2	MDK	ITGA4_ITGB1	2.22439e-07	0	MDK_ITGA4_ITGB1	MDK - (ITGA4+ITGB1)	MK	Secreted Signaling	PMID: 28356350	NL	-0.297069	22.8929	36.2885	3.63171e-54	-2.44494	42.0139	58.2278	0.00190834
397	vRG	Smooth_muscle_2	MDK	ITGA4_ITGB1	2.1856e-07	0	MDK_ITGA4_ITGB1	MDK - (ITGA4+ITGB1)	MK	Secreted Signaling	PMID: 28356350	NL	-0.28137	20.2429	34.751	7.89339e-13	-2.44494	42.0139	58.2278	0.00190834
398	Cycling_progenitors	Smooth_muscle_2	MDK	ITGA4_ITGB1	2.03322e-07	0	MDK_ITGA4_ITGB1	MDK - (ITGA4+ITGB1)	MK	Secreted Signaling	PMID: 28356350	NL	-0.298664	18.3597	35	6.43088e-22	-2.44494	42.0139	58.2278	0.00190834
399	Mig_Layer_2-3_ExN	Smooth_muscle_1	MDK	ITGA4_ITGB1	2.20709e-08	0	MDK_ITGA4_ITGB1	MDK - (ITGA4+ITGB1)	MK	Secreted Signaling	PMID: 28356350	NL	-0.0746085	16.3898	25.4266	2.72766e-95	-0.454957	36.9748	62.7907	0.00223709
400	IP	Smooth_muscle_1	MDK	ITGA4_ITGB1	1.01789e-07	0	MDK_ITGA4_ITGB1	MDK - (ITGA4+ITGB1)	MK	Secreted Signaling	PMID: 28356350	NL	-0.291885	20.4638	35.9293	3.36439e-83	-0.454957	36.9748	62.7907	0.00223709
401	oRG	Smooth_muscle_1	MDK	ITGA4_ITGB1	8.50253e-08	0	MDK_ITGA4_ITGB1	MDK - (ITGA4+ITGB1)	MK	Secreted Signaling	PMID: 28356350	NL	-0.297069	22.8929	36.2885	3.63171e-54	-0.454957	36.9748	62.7907	0.00223709
402	vRG	Smooth_muscle_1	MDK	ITGA4_ITGB1	8.35425e-08	0	MDK_ITGA4_ITGB1	MDK - (ITGA4+ITGB1)	MK	Secreted Signaling	PMID: 28356350	NL	-0.28137	20.2429	34.751	7.89339e-13	-0.454957	36.9748	62.7907	0.00223709
403	Cycling_progenitors	Smooth_muscle_1	MDK	ITGA4_ITGB1	7.7718e-08	0	MDK_ITGA4_ITGB1	MDK - (ITGA4+ITGB1)	MK	Secreted Signaling	PMID: 28356350	NL	-0.298664	18.3597	35	6.43088e-22	-0.454957	36.9748	62.7907	0.00223709
404	Mig_Layer_2-3_ExN	Smooth_muscle_2	MDK	ITGA6_ITGB1	2.08942e-07	0	MDK_ITGA6_ITGB1	MDK - (ITGA6+ITGB1)	MK	Secreted Signaling	PMID: 28356350	NL	-0.0746085	16.3898	25.4266	2.72766e-95	-3.72157	61.8056	81.0127	2.86143e-08
405	IP	Smooth_muscle_2	MDK	ITGA6_ITGB1	9.63622e-07	0	MDK_ITGA6_ITGB1	MDK - (ITGA6+ITGB1)	MK	Secreted Signaling	PMID: 28356350	NL	-0.291885	20.4638	35.9293	3.36439e-83	-3.72157	61.8056	81.0127	2.86143e-08
406	oRG	Smooth_muscle_2	MDK	ITGA6_ITGB1	8.04921e-07	0	MDK_ITGA6_ITGB1	MDK - (ITGA6+ITGB1)	MK	Secreted Signaling	PMID: 28356350	NL	-0.297069	22.8929	36.2885	3.63171e-54	-3.72157	61.8056	81.0127	2.86143e-08
407	vRG	Smooth_muscle_2	MDK	ITGA6_ITGB1	7.90884e-07	0	MDK_ITGA6_ITGB1	MDK - (ITGA6+ITGB1)	MK	Secreted Signaling	PMID: 28356350	NL	-0.28137	20.2429	34.751	7.89339e-13	-3.72157	61.8056	81.0127	2.86143e-08
408	Cycling_progenitors	Smooth_muscle_2	MDK	ITGA6_ITGB1	7.35744e-07	0	MDK_ITGA6_ITGB1	MDK - (ITGA6+ITGB1)	MK	Secreted Signaling	PMID: 28356350	NL	-0.298664	18.3597	35	6.43088e-22	-3.72157	61.8056	81.0127	2.86143e-08
409	Mig_Layer_2-3_ExN	Layer_2-4_ExN	MDK	LRP1	1.14668e-08	0	MDK_LRP1	MDK - LRP1	MK	Secreted Signaling	PMID: 28356350	NL	-0.0746085	16.3898	25.4266	2.72766e-95	-0.141567	33.2629	40.0098	3.59116e-20
410	IP	Layer_2-4_ExN	MDK	LRP1	5.2884e-08	0	MDK_LRP1	MDK - LRP1	MK	Secreted Signaling	PMID: 28356350	NL	-0.291885	20.4638	35.9293	3.36439e-83	-0.141567	33.2629	40.0098	3.59116e-20
411	oRG	Layer_2-4_ExN	MDK	LRP1	4.41744e-08	0	MDK_LRP1	MDK - LRP1	MK	Secreted Signaling	PMID: 28356350	NL	-0.297069	22.8929	36.2885	3.63171e-54	-0.141567	33.2629	40.0098	3.59116e-20
412	vRG	Layer_2-4_ExN	MDK	LRP1	4.3404e-08	0	MDK_LRP1	MDK - LRP1	MK	Secreted Signaling	PMID: 28356350	NL	-0.28137	20.2429	34.751	7.89339e-13	-0.141567	33.2629	40.0098	3.59116e-20
413	Cycling_progenitors	Layer_2-4_ExN	MDK	LRP1	4.0378e-08	0	MDK_LRP1	MDK - LRP1	MK	Secreted Signaling	PMID: 28356350	NL	-0.298664	18.3597	35	6.43088e-22	-0.141567	33.2629	40.0098	3.59116e-20
414	Mig_Layer_2-3_ExN	Mig_Layer_2-4_ExN	MDK	LRP1	1.09192e-08	0	MDK_LRP1	MDK - LRP1	MK	Secreted Signaling	PMID: 28356350	NL	-0.0746085	16.3898	25.4266	2.72766e-95	NA	NA	NA	NA
415	IP	Mig_Layer_2-4_ExN	MDK	LRP1	5.03584e-08	0	MDK_LRP1	MDK - LRP1	MK	Secreted Signaling	PMID: 28356350	NL	-0.291885	20.4638	35.9293	3.36439e-83	NA	NA	NA	NA
416	oRG	Mig_Layer_2-4_ExN	MDK	LRP1	4.20647e-08	0	MDK_LRP1	MDK - LRP1	MK	Secreted Signaling	PMID: 28356350	NL	-0.297069	22.8929	36.2885	3.63171e-54	NA	NA	NA	NA
417	vRG	Mig_Layer_2-4_ExN	MDK	LRP1	4.13311e-08	0	MDK_LRP1	MDK - LRP1	MK	Secreted Signaling	PMID: 28356350	NL	-0.28137	20.2429	34.751	7.89339e-13	NA	NA	NA	NA
418	Cycling_progenitors	Mig_Layer_2-4_ExN	MDK	LRP1	3.84496e-08	0	MDK_LRP1	MDK - LRP1	MK	Secreted Signaling	PMID: 28356350	NL	-0.298664	18.3597	35	6.43088e-22	NA	NA	NA	NA
419	Mig_Layer_2-3_ExN	Layer_4-6_ExN	MDK	LRP1	1.0611e-08	0	MDK_LRP1	MDK - LRP1	MK	Secreted Signaling	PMID: 28356350	NL	-0.0746085	16.3898	25.4266	2.72766e-95	-0.0732623	28.0053	31.4958	1.88331e-05
420	IP	Layer_4-6_ExN	MDK	LRP1	4.89369e-08	0	MDK_LRP1	MDK - LRP1	MK	Secreted Signaling	PMID: 28356350	NL	-0.291885	20.4638	35.9293	3.36439e-83	-0.0732623	28.0053	31.4958	1.88331e-05
421	oRG	Layer_4-6_ExN	MDK	LRP1	4.08774e-08	0	MDK_LRP1	MDK - LRP1	MK	Secreted Signaling	PMID: 28356350	NL	-0.297069	22.8929	36.2885	3.63171e-54	-0.0732623	28.0053	31.4958	1.88331e-05
422	vRG	Layer_4-6_ExN	MDK	LRP1	4.01645e-08	0	MDK_LRP1	MDK - LRP1	MK	Secreted Signaling	PMID: 28356350	NL	-0.28137	20.2429	34.751	7.89339e-13	-0.0732623	28.0053	31.4958	1.88331e-05
423	Cycling_progenitors	Layer_4-6_ExN	MDK	LRP1	3.73643e-08	0	MDK_LRP1	MDK - LRP1	MK	Secreted Signaling	PMID: 28356350	NL	-0.298664	18.3597	35	6.43088e-22	-0.0732623	28.0053	31.4958	1.88331e-05
424	Mig_Layer_2-3_ExN	Microglia_1	MDK	LRP1	1.0278e-08	0	MDK_LRP1	MDK - LRP1	MK	Secreted Signaling	PMID: 28356350	NL	-0.0746085	16.3898	25.4266	2.72766e-95	NA	NA	NA	NA
425	IP	Microglia_1	MDK	LRP1	4.74012e-08	0	MDK_LRP1	MDK - LRP1	MK	Secreted Signaling	PMID: 28356350	NL	-0.291885	20.4638	35.9293	3.36439e-83	NA	NA	NA	NA
426	oRG	Microglia_1	MDK	LRP1	3.95945e-08	0	MDK_LRP1	MDK - LRP1	MK	Secreted Signaling	PMID: 28356350	NL	-0.297069	22.8929	36.2885	3.63171e-54	NA	NA	NA	NA
427	vRG	Microglia_1	MDK	LRP1	3.8904e-08	0	MDK_LRP1	MDK - LRP1	MK	Secreted Signaling	PMID: 28356350	NL	-0.28137	20.2429	34.751	7.89339e-13	NA	NA	NA	NA
428	Cycling_progenitors	Microglia_1	MDK	LRP1	3.61917e-08	0	MDK_LRP1	MDK - LRP1	MK	Secreted Signaling	PMID: 28356350	NL	-0.298664	18.3597	35	6.43088e-22	NA	NA	NA	NA
429	Mig_Layer_2-3_ExN	Layer_5-6_ExN	MDK	LRP1	1.05185e-08	0	MDK_LRP1	MDK - LRP1	MK	Secreted Signaling	PMID: 28356350	NL	-0.0746085	16.3898	25.4266	2.72766e-95	-0.0832364	28.0061	33.5534	2.19976e-07
430	IP	Layer_5-6_ExN	MDK	LRP1	4.85106e-08	0	MDK_LRP1	MDK - LRP1	MK	Secreted Signaling	PMID: 28356350	NL	-0.291885	20.4638	35.9293	3.36439e-83	-0.0832364	28.0061	33.5534	2.19976e-07
431	oRG	Layer_5-6_ExN	MDK	LRP1	4.05213e-08	0	MDK_LRP1	MDK - LRP1	MK	Secreted Signaling	PMID: 28356350	NL	-0.297069	22.8929	36.2885	3.63171e-54	-0.0832364	28.0061	33.5534	2.19976e-07
432	vRG	Layer_5-6_ExN	MDK	LRP1	3.98146e-08	0	MDK_LRP1	MDK - LRP1	MK	Secreted Signaling	PMID: 28356350	NL	-0.28137	20.2429	34.751	7.89339e-13	-0.0832364	28.0061	33.5534	2.19976e-07
433	Cycling_progenitors	Layer_5-6_ExN	MDK	LRP1	3.70388e-08	0	MDK_LRP1	MDK - LRP1	MK	Secreted Signaling	PMID: 28356350	NL	-0.298664	18.3597	35	6.43088e-22	-0.0832364	28.0061	33.5534	2.19976e-07
434	Mig_Layer_2-3_ExN	OPC_1	MDK	LRP1	1.20318e-08	0	MDK_LRP1	MDK - LRP1	MK	Secreted Signaling	PMID: 28356350	NL	-0.0746085	16.3898	25.4266	2.72766e-95	NA	NA	NA	NA
435	IP	OPC_1	MDK	LRP1	5.54897e-08	0	MDK_LRP1	MDK - LRP1	MK	Secreted Signaling	PMID: 28356350	NL	-0.291885	20.4638	35.9293	3.36439e-83	NA	NA	NA	NA
436	oRG	OPC_1	MDK	LRP1	4.63509e-08	0	MDK_LRP1	MDK - LRP1	MK	Secreted Signaling	PMID: 28356350	NL	-0.297069	22.8929	36.2885	3.63171e-54	NA	NA	NA	NA
437	vRG	OPC_1	MDK	LRP1	4.55426e-08	0	MDK_LRP1	MDK - LRP1	MK	Secreted Signaling	PMID: 28356350	NL	-0.28137	20.2429	34.751	7.89339e-13	NA	NA	NA	NA
438	Cycling_progenitors	OPC_1	MDK	LRP1	4.23674e-08	0	MDK_LRP1	MDK - LRP1	MK	Secreted Signaling	PMID: 28356350	NL	-0.298664	18.3597	35	6.43088e-22	NA	NA	NA	NA
439	Mig_Layer_2-3_ExN	Smooth_muscle_1	MDK	LRP1	2.72019e-09	0	MDK_LRP1	MDK - LRP1	MK	Secreted Signaling	PMID: 28356350	NL	-0.0746085	16.3898	25.4266	2.72766e-95	NA	NA	NA	NA
440	IP	Smooth_muscle_1	MDK	LRP1	1.25453e-08	0	MDK_LRP1	MDK - LRP1	MK	Secreted Signaling	PMID: 28356350	NL	-0.291885	20.4638	35.9293	3.36439e-83	NA	NA	NA	NA
441	oRG	Smooth_muscle_1	MDK	LRP1	1.04792e-08	0	MDK_LRP1	MDK - LRP1	MK	Secreted Signaling	PMID: 28356350	NL	-0.297069	22.8929	36.2885	3.63171e-54	NA	NA	NA	NA
442	vRG	Smooth_muscle_1	MDK	LRP1	1.02964e-08	0.01	MDK_LRP1	MDK - LRP1	MK	Secreted Signaling	PMID: 28356350	NL	-0.28137	20.2429	34.751	7.89339e-13	NA	NA	NA	NA
443	Cycling_progenitors	Smooth_muscle_1	MDK	LRP1	9.57859e-09	0	MDK_LRP1	MDK - LRP1	MK	Secreted Signaling	PMID: 28356350	NL	-0.298664	18.3597	35	6.43088e-22	NA	NA	NA	NA
444	Mig_Layer_2-3_ExN	Layer_4-5_ExN	MDK	LRP1	1.14868e-08	0	MDK_LRP1	MDK - LRP1	MK	Secreted Signaling	PMID: 28356350	NL	-0.0746085	16.3898	25.4266	2.72766e-95	NA	NA	NA	NA
445	IP	Layer_4-5_ExN	MDK	LRP1	5.2976e-08	0	MDK_LRP1	MDK - LRP1	MK	Secreted Signaling	PMID: 28356350	NL	-0.291885	20.4638	35.9293	3.36439e-83	NA	NA	NA	NA
446	oRG	Layer_4-5_ExN	MDK	LRP1	4.42513e-08	0	MDK_LRP1	MDK - LRP1	MK	Secreted Signaling	PMID: 28356350	NL	-0.297069	22.8929	36.2885	3.63171e-54	NA	NA	NA	NA
447	vRG	Layer_4-5_ExN	MDK	LRP1	4.34796e-08	0	MDK_LRP1	MDK - LRP1	MK	Secreted Signaling	PMID: 28356350	NL	-0.28137	20.2429	34.751	7.89339e-13	NA	NA	NA	NA
448	Cycling_progenitors	Layer_4-5_ExN	MDK	LRP1	4.04482e-08	0	MDK_LRP1	MDK - LRP1	MK	Secreted Signaling	PMID: 28356350	NL	-0.298664	18.3597	35	6.43088e-22	NA	NA	NA	NA
449	Mig_Layer_2-3_ExN	Interneuron_S2	MDK	LRP1	1.12232e-08	0	MDK_LRP1	MDK - LRP1	MK	Secreted Signaling	PMID: 28356350	NL	-0.0746085	16.3898	25.4266	2.72766e-95	0.171144	45.7895	38.1333	2.23972e-05
450	IP	Interneuron_S2	MDK	LRP1	5.17604e-08	0	MDK_LRP1	MDK - LRP1	MK	Secreted Signaling	PMID: 28356350	NL	-0.291885	20.4638	35.9293	3.36439e-83	0.171144	45.7895	38.1333	2.23972e-05
451	oRG	Interneuron_S2	MDK	LRP1	4.32358e-08	0	MDK_LRP1	MDK - LRP1	MK	Secreted Signaling	PMID: 28356350	NL	-0.297069	22.8929	36.2885	3.63171e-54	0.171144	45.7895	38.1333	2.23972e-05
452	vRG	Interneuron_S2	MDK	LRP1	4.24818e-08	0	MDK_LRP1	MDK - LRP1	MK	Secreted Signaling	PMID: 28356350	NL	-0.28137	20.2429	34.751	7.89339e-13	0.171144	45.7895	38.1333	2.23972e-05
453	Cycling_progenitors	Interneuron_S2	MDK	LRP1	3.952e-08	0	MDK_LRP1	MDK - LRP1	MK	Secreted Signaling	PMID: 28356350	NL	-0.298664	18.3597	35	6.43088e-22	0.171144	45.7895	38.1333	2.23972e-05
454	Mig_Layer_2-3_ExN	Layer_2-4_ExN	MDK	NCL	1.01505e-08	0	MDK_NCL	MDK - NCL	MK	Secreted Signaling	PMID: 28356350	NL	-0.0746085	16.3898	25.4266	2.72766e-95	-0.241347	20.1514	34.1964	1.80797e-71
455	IP	Layer_2-4_ExN	MDK	NCL	4.68135e-08	0	MDK_NCL	MDK - NCL	MK	Secreted Signaling	PMID: 28356350	NL	-0.291885	20.4638	35.9293	3.36439e-83	-0.241347	20.1514	34.1964	1.80797e-71
456	oRG	Layer_2-4_ExN	MDK	NCL	3.91037e-08	0	MDK_NCL	MDK - NCL	MK	Secreted Signaling	PMID: 28356350	NL	-0.297069	22.8929	36.2885	3.63171e-54	-0.241347	20.1514	34.1964	1.80797e-71
457	vRG	Layer_2-4_ExN	MDK	NCL	3.84218e-08	0	MDK_NCL	MDK - NCL	MK	Secreted Signaling	PMID: 28356350	NL	-0.28137	20.2429	34.751	7.89339e-13	-0.241347	20.1514	34.1964	1.80797e-71
458	Cycling_progenitors	Layer_2-4_ExN	MDK	NCL	3.5743e-08	0	MDK_NCL	MDK - NCL	MK	Secreted Signaling	PMID: 28356350	NL	-0.298664	18.3597	35	6.43088e-22	-0.241347	20.1514	34.1964	1.80797e-71
459	Mig_Layer_2-3_ExN	Mig_Layer_2-4_ExN	MDK	NCL	8.54224e-09	0	MDK_NCL	MDK - NCL	MK	Secreted Signaling	PMID: 28356350	NL	-0.0746085	16.3898	25.4266	2.72766e-95	-0.127685	18.9288	27.8878	1.01674e-20
460	IP	Mig_Layer_2-4_ExN	MDK	NCL	3.93961e-08	0	MDK_NCL	MDK - NCL	MK	Secreted Signaling	PMID: 28356350	NL	-0.291885	20.4638	35.9293	3.36439e-83	-0.127685	18.9288	27.8878	1.01674e-20
461	oRG	Mig_Layer_2-4_ExN	MDK	NCL	3.29079e-08	0	MDK_NCL	MDK - NCL	MK	Secreted Signaling	PMID: 28356350	NL	-0.297069	22.8929	36.2885	3.63171e-54	-0.127685	18.9288	27.8878	1.01674e-20
462	vRG	Mig_Layer_2-4_ExN	MDK	NCL	3.2334e-08	0	MDK_NCL	MDK - NCL	MK	Secreted Signaling	PMID: 28356350	NL	-0.28137	20.2429	34.751	7.89339e-13	-0.127685	18.9288	27.8878	1.01674e-20
463	Cycling_progenitors	Mig_Layer_2-4_ExN	MDK	NCL	3.00797e-08	0	MDK_NCL	MDK - NCL	MK	Secreted Signaling	PMID: 28356350	NL	-0.298664	18.3597	35	6.43088e-22	-0.127685	18.9288	27.8878	1.01674e-20
464	Mig_Layer_2-3_ExN	IP	MDK	NCL	9.88485e-09	0	MDK_NCL	MDK - NCL	MK	Secreted Signaling	PMID: 28356350	NL	-0.0746085	16.3898	25.4266	2.72766e-95	-0.0958635	19.8535	26.2127	1.16394e-17
465	IP	IP	MDK	NCL	4.55882e-08	0	MDK_NCL	MDK - NCL	MK	Secreted Signaling	PMID: 28356350	NL	-0.291885	20.4638	35.9293	3.36439e-83	-0.0958635	19.8535	26.2127	1.16394e-17
466	oRG	IP	MDK	NCL	3.80802e-08	0	MDK_NCL	MDK - NCL	MK	Secreted Signaling	PMID: 28356350	NL	-0.297069	22.8929	36.2885	3.63171e-54	-0.0958635	19.8535	26.2127	1.16394e-17
467	vRG	IP	MDK	NCL	3.74161e-08	0	MDK_NCL	MDK - NCL	MK	Secreted Signaling	PMID: 28356350	NL	-0.28137	20.2429	34.751	7.89339e-13	-0.0958635	19.8535	26.2127	1.16394e-17
468	Cycling_progenitors	IP	MDK	NCL	3.48074e-08	0	MDK_NCL	MDK - NCL	MK	Secreted Signaling	PMID: 28356350	NL	-0.298664	18.3597	35	6.43088e-22	-0.0958635	19.8535	26.2127	1.16394e-17
469	Mig_Layer_2-3_ExN	oRG	MDK	NCL	1.01744e-08	0	MDK_NCL	MDK - NCL	MK	Secreted Signaling	PMID: 28356350	NL	-0.0746085	16.3898	25.4266	2.72766e-95	-0.126246	20.7199	29.6759	1.1835e-25
470	IP	oRG	MDK	NCL	4.69235e-08	0	MDK_NCL	MDK - NCL	MK	Secreted Signaling	PMID: 28356350	NL	-0.291885	20.4638	35.9293	3.36439e-83	-0.126246	20.7199	29.6759	1.1835e-25
471	oRG	oRG	MDK	NCL	3.91956e-08	0	MDK_NCL	MDK - NCL	MK	Secreted Signaling	PMID: 28356350	NL	-0.297069	22.8929	36.2885	3.63171e-54	-0.126246	20.7199	29.6759	1.1835e-25
472	vRG	oRG	MDK	NCL	3.8512e-08	0	MDK_NCL	MDK - NCL	MK	Secreted Signaling	PMID: 28356350	NL	-0.28137	20.2429	34.751	7.89339e-13	-0.126246	20.7199	29.6759	1.1835e-25
473	Cycling_progenitors	oRG	MDK	NCL	3.5827e-08	0	MDK_NCL	MDK - NCL	MK	Secreted Signaling	PMID: 28356350	NL	-0.298664	18.3597	35	6.43088e-22	-0.126246	20.7199	29.6759	1.1835e-25
474	Mig_Layer_2-3_ExN	Cycling_progenitors	MDK	NCL	9.34381e-09	0	MDK_NCL	MDK - NCL	MK	Secreted Signaling	PMID: 28356350	NL	-0.0746085	16.3898	25.4266	2.72766e-95	-0.135262	20.4101	28.2778	3.77408e-07
475	IP	Cycling_progenitors	MDK	NCL	4.30929e-08	0	MDK_NCL	MDK - NCL	MK	Secreted Signaling	PMID: 28356350	NL	-0.291885	20.4638	35.9293	3.36439e-83	-0.135262	20.4101	28.2778	3.77408e-07
476	oRG	Cycling_progenitors	MDK	NCL	3.59959e-08	0	MDK_NCL	MDK - NCL	MK	Secreted Signaling	PMID: 28356350	NL	-0.297069	22.8929	36.2885	3.63171e-54	-0.135262	20.4101	28.2778	3.77408e-07
477	vRG	Cycling_progenitors	MDK	NCL	3.53681e-08	0	MDK_NCL	MDK - NCL	MK	Secreted Signaling	PMID: 28356350	NL	-0.28137	20.2429	34.751	7.89339e-13	-0.135262	20.4101	28.2778	3.77408e-07
478	Cycling_progenitors	Cycling_progenitors	MDK	NCL	3.29023e-08	0	MDK_NCL	MDK - NCL	MK	Secreted Signaling	PMID: 28356350	NL	-0.298664	18.3597	35	6.43088e-22	-0.135262	20.4101	28.2778	3.77408e-07
479	Mig_Layer_2-3_ExN	Layer_4-6_ExN	MDK	NCL	7.76062e-09	0	MDK_NCL	MDK - NCL	MK	Secreted Signaling	PMID: 28356350	NL	-0.0746085	16.3898	25.4266	2.72766e-95	-0.112983	21.9415	30.0992	3.53333e-15
480	IP	Layer_4-6_ExN	MDK	NCL	3.57914e-08	0	MDK_NCL	MDK - NCL	MK	Secreted Signaling	PMID: 28356350	NL	-0.291885	20.4638	35.9293	3.36439e-83	-0.112983	21.9415	30.0992	3.53333e-15
481	oRG	Layer_4-6_ExN	MDK	NCL	2.98968e-08	0	MDK_NCL	MDK - NCL	MK	Secreted Signaling	PMID: 28356350	NL	-0.297069	22.8929	36.2885	3.63171e-54	-0.112983	21.9415	30.0992	3.53333e-15
482	vRG	Layer_4-6_ExN	MDK	NCL	2.93754e-08	0	MDK_NCL	MDK - NCL	MK	Secreted Signaling	PMID: 28356350	NL	-0.28137	20.2429	34.751	7.89339e-13	-0.112983	21.9415	30.0992	3.53333e-15
483	Cycling_progenitors	Layer_4-6_ExN	MDK	NCL	2.73274e-08	0	MDK_NCL	MDK - NCL	MK	Secreted Signaling	PMID: 28356350	NL	-0.298664	18.3597	35	6.43088e-22	-0.112983	21.9415	30.0992	3.53333e-15
484	Mig_Layer_2-3_ExN	Microglia_1	MDK	NCL	1.02233e-08	0	MDK_NCL	MDK - NCL	MK	Secreted Signaling	PMID: 28356350	NL	-0.0746085	16.3898	25.4266	2.72766e-95	NA	NA	NA	NA
485	IP	Microglia_1	MDK	NCL	4.71488e-08	0	MDK_NCL	MDK - NCL	MK	Secreted Signaling	PMID: 28356350	NL	-0.291885	20.4638	35.9293	3.36439e-83	NA	NA	NA	NA
486	oRG	Microglia_1	MDK	NCL	3.93838e-08	0	MDK_NCL	MDK - NCL	MK	Secreted Signaling	PMID: 28356350	NL	-0.297069	22.8929	36.2885	3.63171e-54	NA	NA	NA	NA
487	vRG	Microglia_1	MDK	NCL	3.8697e-08	0	MDK_NCL	MDK - NCL	MK	Secreted Signaling	PMID: 28356350	NL	-0.28137	20.2429	34.751	7.89339e-13	NA	NA	NA	NA
488	Cycling_progenitors	Microglia_1	MDK	NCL	3.5999e-08	0	MDK_NCL	MDK - NCL	MK	Secreted Signaling	PMID: 28356350	NL	-0.298664	18.3597	35	6.43088e-22	NA	NA	NA	NA
489	Mig_Layer_2-3_ExN	Layer_5-6_ExN	MDK	NCL	7.29734e-09	0	MDK_NCL	MDK - NCL	MK	Secreted Signaling	PMID: 28356350	NL	-0.0746085	16.3898	25.4266	2.72766e-95	-0.105809	22.8221	30.2897	2.19964e-11
490	IP	Layer_5-6_ExN	MDK	NCL	3.36548e-08	0	MDK_NCL	MDK - NCL	MK	Secreted Signaling	PMID: 28356350	NL	-0.291885	20.4638	35.9293	3.36439e-83	-0.105809	22.8221	30.2897	2.19964e-11
491	oRG	Layer_5-6_ExN	MDK	NCL	2.81121e-08	0	MDK_NCL	MDK - NCL	MK	Secreted Signaling	PMID: 28356350	NL	-0.297069	22.8929	36.2885	3.63171e-54	-0.105809	22.8221	30.2897	2.19964e-11
492	vRG	Layer_5-6_ExN	MDK	NCL	2.76218e-08	0	MDK_NCL	MDK - NCL	MK	Secreted Signaling	PMID: 28356350	NL	-0.28137	20.2429	34.751	7.89339e-13	-0.105809	22.8221	30.2897	2.19964e-11
493	Cycling_progenitors	Layer_5-6_ExN	MDK	NCL	2.56961e-08	0	MDK_NCL	MDK - NCL	MK	Secreted Signaling	PMID: 28356350	NL	-0.298664	18.3597	35	6.43088e-22	-0.105809	22.8221	30.2897	2.19964e-11
494	Mig_Layer_2-3_ExN	Smooth_muscle_2	MDK	NCL	1.07404e-07	0	MDK_NCL	MDK - NCL	MK	Secreted Signaling	PMID: 28356350	NL	-0.0746085	16.3898	25.4266	2.72766e-95	-1.8949	46.5278	70.2532	5.45157e-08
495	IP	Smooth_muscle_2	MDK	NCL	4.95338e-07	0	MDK_NCL	MDK - NCL	MK	Secreted Signaling	PMID: 28356350	NL	-0.291885	20.4638	35.9293	3.36439e-83	-1.8949	46.5278	70.2532	5.45157e-08
496	oRG	Smooth_muscle_2	MDK	NCL	4.13759e-07	0	MDK_NCL	MDK - NCL	MK	Secreted Signaling	PMID: 28356350	NL	-0.297069	22.8929	36.2885	3.63171e-54	-1.8949	46.5278	70.2532	5.45157e-08
497	vRG	Smooth_muscle_2	MDK	NCL	4.06544e-07	0	MDK_NCL	MDK - NCL	MK	Secreted Signaling	PMID: 28356350	NL	-0.28137	20.2429	34.751	7.89339e-13	-1.8949	46.5278	70.2532	5.45157e-08
498	Cycling_progenitors	Smooth_muscle_2	MDK	NCL	3.782e-07	0	MDK_NCL	MDK - NCL	MK	Secreted Signaling	PMID: 28356350	NL	-0.298664	18.3597	35	6.43088e-22	-1.8949	46.5278	70.2532	5.45157e-08
499	Mig_Layer_2-3_ExN	OL	MDK	NCL	8.79697e-09	0	MDK_NCL	MDK - NCL	MK	Secreted Signaling	PMID: 28356350	NL	-0.0746085	16.3898	25.4266	2.72766e-95	NA	NA	NA	NA
500	IP	OL	MDK	NCL	4.0571e-08	0	MDK_NCL	MDK - NCL	MK	Secreted Signaling	PMID: 28356350	NL	-0.291885	20.4638	35.9293	3.36439e-83	NA	NA	NA	NA
501	oRG	OL	MDK	NCL	3.38892e-08	0	MDK_NCL	MDK - NCL	MK	Secreted Signaling	PMID: 28356350	NL	-0.297069	22.8929	36.2885	3.63171e-54	NA	NA	NA	NA
502	vRG	OL	MDK	NCL	3.32982e-08	0	MDK_NCL	MDK - NCL	MK	Secreted Signaling	PMID: 28356350	NL	-0.28137	20.2429	34.751	7.89339e-13	NA	NA	NA	NA
503	Cycling_progenitors	OL	MDK	NCL	3.09767e-08	0	MDK_NCL	MDK - NCL	MK	Secreted Signaling	PMID: 28356350	NL	-0.298664	18.3597	35	6.43088e-22	NA	NA	NA	NA
504	Mig_Layer_2-3_ExN	Interneuron_4	MDK	NCL	9.19648e-09	0	MDK_NCL	MDK - NCL	MK	Secreted Signaling	PMID: 28356350	NL	-0.0746085	16.3898	25.4266	2.72766e-95	-0.136253	13.4454	26.0274	0.0410975
505	IP	Interneuron_4	MDK	NCL	4.24135e-08	0	MDK_NCL	MDK - NCL	MK	Secreted Signaling	PMID: 28356350	NL	-0.291885	20.4638	35.9293	3.36439e-83	-0.136253	13.4454	26.0274	0.0410975
506	oRG	Interneuron_4	MDK	NCL	3.54283e-08	0	MDK_NCL	MDK - NCL	MK	Secreted Signaling	PMID: 28356350	NL	-0.297069	22.8929	36.2885	3.63171e-54	-0.136253	13.4454	26.0274	0.0410975
507	vRG	Interneuron_4	MDK	NCL	3.48104e-08	0	MDK_NCL	MDK - NCL	MK	Secreted Signaling	PMID: 28356350	NL	-0.28137	20.2429	34.751	7.89339e-13	-0.136253	13.4454	26.0274	0.0410975
508	Cycling_progenitors	Interneuron_4	MDK	NCL	3.23835e-08	0	MDK_NCL	MDK - NCL	MK	Secreted Signaling	PMID: 28356350	NL	-0.298664	18.3597	35	6.43088e-22	-0.136253	13.4454	26.0274	0.0410975
509	Mig_Layer_2-3_ExN	IP_IN	MDK	NCL	1.12428e-08	0	MDK_NCL	MDK - NCL	MK	Secreted Signaling	PMID: 28356350	NL	-0.0746085	16.3898	25.4266	2.72766e-95	-0.199004	10.3659	26.4264	6.46011e-05
510	IP	IP_IN	MDK	NCL	5.18508e-08	0	MDK_NCL	MDK - NCL	MK	Secreted Signaling	PMID: 28356350	NL	-0.291885	20.4638	35.9293	3.36439e-83	-0.199004	10.3659	26.4264	6.46011e-05
511	oRG	IP_IN	MDK	NCL	4.33113e-08	0	MDK_NCL	MDK - NCL	MK	Secreted Signaling	PMID: 28356350	NL	-0.297069	22.8929	36.2885	3.63171e-54	-0.199004	10.3659	26.4264	6.46011e-05
512	vRG	IP_IN	MDK	NCL	4.2556e-08	0	MDK_NCL	MDK - NCL	MK	Secreted Signaling	PMID: 28356350	NL	-0.28137	20.2429	34.751	7.89339e-13	-0.199004	10.3659	26.4264	6.46011e-05
513	Cycling_progenitors	IP_IN	MDK	NCL	3.95891e-08	0	MDK_NCL	MDK - NCL	MK	Secreted Signaling	PMID: 28356350	NL	-0.298664	18.3597	35	6.43088e-22	-0.199004	10.3659	26.4264	6.46011e-05
514	Mig_Layer_2-3_ExN	Smooth_muscle_1	MDK	NCL	1.04635e-08	0	MDK_NCL	MDK - NCL	MK	Secreted Signaling	PMID: 28356350	NL	-0.0746085	16.3898	25.4266	2.72766e-95	NA	NA	NA	NA
515	IP	Smooth_muscle_1	MDK	NCL	4.82568e-08	0	MDK_NCL	MDK - NCL	MK	Secreted Signaling	PMID: 28356350	NL	-0.291885	20.4638	35.9293	3.36439e-83	NA	NA	NA	NA
516	oRG	Smooth_muscle_1	MDK	NCL	4.03093e-08	0	MDK_NCL	MDK - NCL	MK	Secreted Signaling	PMID: 28356350	NL	-0.297069	22.8929	36.2885	3.63171e-54	NA	NA	NA	NA
517	vRG	Smooth_muscle_1	MDK	NCL	3.96063e-08	0	MDK_NCL	MDK - NCL	MK	Secreted Signaling	PMID: 28356350	NL	-0.28137	20.2429	34.751	7.89339e-13	NA	NA	NA	NA
518	Cycling_progenitors	Smooth_muscle_1	MDK	NCL	3.6845e-08	0	MDK_NCL	MDK - NCL	MK	Secreted Signaling	PMID: 28356350	NL	-0.298664	18.3597	35	6.43088e-22	NA	NA	NA	NA
519	Mig_Layer_2-3_ExN	Layer_4-5_ExN	MDK	NCL	7.6738e-09	0	MDK_NCL	MDK - NCL	MK	Secreted Signaling	PMID: 28356350	NL	-0.0746085	16.3898	25.4266	2.72766e-95	-0.121908	21.493	32.1792	8.30308e-06
520	IP	Layer_4-5_ExN	MDK	NCL	3.5391e-08	0	MDK_NCL	MDK - NCL	MK	Secreted Signaling	PMID: 28356350	NL	-0.291885	20.4638	35.9293	3.36439e-83	-0.121908	21.493	32.1792	8.30308e-06
521	oRG	Layer_4-5_ExN	MDK	NCL	2.95623e-08	0	MDK_NCL	MDK - NCL	MK	Secreted Signaling	PMID: 28356350	NL	-0.297069	22.8929	36.2885	3.63171e-54	-0.121908	21.493	32.1792	8.30308e-06
522	vRG	Layer_4-5_ExN	MDK	NCL	2.90468e-08	0	MDK_NCL	MDK - NCL	MK	Secreted Signaling	PMID: 28356350	NL	-0.28137	20.2429	34.751	7.89339e-13	-0.121908	21.493	32.1792	8.30308e-06
523	Cycling_progenitors	Layer_4-5_ExN	MDK	NCL	2.70217e-08	0	MDK_NCL	MDK - NCL	MK	Secreted Signaling	PMID: 28356350	NL	-0.298664	18.3597	35	6.43088e-22	-0.121908	21.493	32.1792	8.30308e-06
524	Mig_Layer_2-3_ExN	Interneuron_S1	MDK	ALK	2.65962e-08	0	MDK_ALK	MDK - ALK	MK	Secreted Signaling	PMID: 19459784	NL	-0.0746085	16.3898	25.4266	2.72766e-95	NA	NA	NA	NA
525	IP	Interneuron_S1	MDK	ALK	1.2266e-07	0	MDK_ALK	MDK - ALK	MK	Secreted Signaling	PMID: 19459784	NL	-0.291885	20.4638	35.9293	3.36439e-83	NA	NA	NA	NA
526	oRG	Interneuron_S1	MDK	ALK	1.02458e-07	0	MDK_ALK	MDK - ALK	MK	Secreted Signaling	PMID: 19459784	NL	-0.297069	22.8929	36.2885	3.63171e-54	NA	NA	NA	NA
527	vRG	Interneuron_S1	MDK	ALK	1.00672e-07	0	MDK_ALK	MDK - ALK	MK	Secreted Signaling	PMID: 19459784	NL	-0.28137	20.2429	34.751	7.89339e-13	NA	NA	NA	NA
528	Cycling_progenitors	Interneuron_S1	MDK	ALK	9.36529e-08	0	MDK_ALK	MDK - ALK	MK	Secreted Signaling	PMID: 19459784	NL	-0.298664	18.3597	35	6.43088e-22	NA	NA	NA	NA
529	Mig_Layer_2-3_ExN	Interneuron_S2	MDK	ALK	1.26935e-08	0	MDK_ALK	MDK - ALK	MK	Secreted Signaling	PMID: 19459784	NL	-0.0746085	16.3898	25.4266	2.72766e-95	-0.0583848	47.7193	32.2667	1.53453e-05
530	IP	Interneuron_S2	MDK	ALK	5.85416e-08	0	MDK_ALK	MDK - ALK	MK	Secreted Signaling	PMID: 19459784	NL	-0.291885	20.4638	35.9293	3.36439e-83	-0.0583848	47.7193	32.2667	1.53453e-05
531	oRG	Interneuron_S2	MDK	ALK	4.89002e-08	0	MDK_ALK	MDK - ALK	MK	Secreted Signaling	PMID: 19459784	NL	-0.297069	22.8929	36.2885	3.63171e-54	-0.0583848	47.7193	32.2667	1.53453e-05
532	vRG	Interneuron_S2	MDK	ALK	4.80475e-08	0	MDK_ALK	MDK - ALK	MK	Secreted Signaling	PMID: 19459784	NL	-0.28137	20.2429	34.751	7.89339e-13	-0.0583848	47.7193	32.2667	1.53453e-05
533	Cycling_progenitors	Interneuron_S2	MDK	ALK	4.46976e-08	0	MDK_ALK	MDK - ALK	MK	Secreted Signaling	PMID: 19459784	NL	-0.298664	18.3597	35	6.43088e-22	-0.0583848	47.7193	32.2667	1.53453e-05
534	Astrocyte_progenitors	Mig_Layer_2-3_ExN	PTN	PTPRZ1	8.59839e-06	0	PTN_PTPRZ1	PTN - PTPRZ1	PTN	Secreted Signaling	PMID: 28356350; PMID: 25620911	NL	-3.33276	83.1845	89.3897	3.50741e-37	0.0711575	72.4528	69.0939	1.98278e-08
535	oRG	Mig_Layer_2-3_ExN	PTN	PTPRZ1	3.28142e-06	0	PTN_PTPRZ1	PTN - PTPRZ1	PTN	Secreted Signaling	PMID: 28356350; PMID: 25620911	NL	-1.53215	87.5549	71.2642	2.13527e-24	0.0711575	72.4528	69.0939	1.98278e-08
536	vRG	Mig_Layer_2-3_ExN	PTN	PTPRZ1	2.41958e-06	0	PTN_PTPRZ1	PTN - PTPRZ1	PTN	Secreted Signaling	PMID: 28356350; PMID: 25620911	NL	-0.958902	69.332	75.7261	0.00284976	0.0711575	72.4528	69.0939	1.98278e-08
537	Cycling_progenitors	Mig_Layer_2-3_ExN	PTN	PTPRZ1	5.56038e-07	0	PTN_PTPRZ1	PTN - PTPRZ1	PTN	Secreted Signaling	PMID: 28356350; PMID: 25620911	NL	-0.267752	58.9003	48	2.1354e-10	0.0711575	72.4528	69.0939	1.98278e-08
538	Smooth_muscle_1	Mig_Layer_2-3_ExN	PTN	PTPRZ1	3.41669e-06	0	PTN_PTPRZ1	PTN - PTPRZ1	PTN	Secreted Signaling	PMID: 28356350; PMID: 25620911	NL	-0.877426	71.4286	81.3953	0.0151054	0.0711575	72.4528	69.0939	1.98278e-08
539	Mig_Layer_2-3_ExN	Layer_2-4_ExN	PTN	PTPRZ1	7.20664e-07	0	PTN_PTPRZ1	PTN - PTPRZ1	PTN	Secreted Signaling	PMID: 28356350; PMID: 25620911	NL	-0.115145	28.2182	37.6415	1.15989e-72	NA	NA	NA	NA
540	Layer_2-4_ExN	Layer_2-4_ExN	PTN	PTPRZ1	7.33725e-07	0	PTN_PTPRZ1	PTN - PTPRZ1	PTN	Secreted Signaling	PMID: 28356350; PMID: 25620911	NL	-0.140086	31.7318	38.8862	2.51992e-20	NA	NA	NA	NA
541	Astrocyte_progenitors	Layer_2-4_ExN	PTN	PTPRZ1	2.56326e-05	0	PTN_PTPRZ1	PTN - PTPRZ1	PTN	Secreted Signaling	PMID: 28356350; PMID: 25620911	NL	-3.33276	83.1845	89.3897	3.50741e-37	NA	NA	NA	NA
542	Mig_Layer_2-4_ExN	Layer_2-4_ExN	PTN	PTPRZ1	7.65185e-07	0	PTN_PTPRZ1	PTN - PTPRZ1	PTN	Secreted Signaling	PMID: 28356350; PMID: 25620911	NL	-0.171772	32.4001	46.2046	2.40283e-29	NA	NA	NA	NA
543	IP	Layer_2-4_ExN	PTN	PTPRZ1	8.84452e-07	0	PTN_PTPRZ1	PTN - PTPRZ1	PTN	Secreted Signaling	PMID: 28356350; PMID: 25620911	NL	-0.195073	38.4662	43.498	2.12785e-05	NA	NA	NA	NA
544	oRG	Layer_2-4_ExN	PTN	PTPRZ1	9.78234e-06	0	PTN_PTPRZ1	PTN - PTPRZ1	PTN	Secreted Signaling	PMID: 28356350; PMID: 25620911	NL	-1.53215	87.5549	71.2642	2.13527e-24	NA	NA	NA	NA
545	vRG	Layer_2-4_ExN	PTN	PTPRZ1	7.2131e-06	0	PTN_PTPRZ1	PTN - PTPRZ1	PTN	Secreted Signaling	PMID: 28356350; PMID: 25620911	NL	-0.958902	69.332	75.7261	0.00284976	NA	NA	NA	NA
546	Cycling_progenitors	Layer_2-4_ExN	PTN	PTPRZ1	1.65763e-06	0	PTN_PTPRZ1	PTN - PTPRZ1	PTN	Secreted Signaling	PMID: 28356350; PMID: 25620911	NL	-0.267752	58.9003	48	2.1354e-10	NA	NA	NA	NA
547	Layer_4-6_ExN	Layer_2-4_ExN	PTN	PTPRZ1	7.10253e-07	0	PTN_PTPRZ1	PTN - PTPRZ1	PTN	Secreted Signaling	PMID: 28356350; PMID: 25620911	NL	-0.104666	33.6968	44.2484	8.24442e-14	NA	NA	NA	NA
548	Layer_5-6_ExN	Layer_2-4_ExN	PTN	PTPRZ1	6.5901e-07	0	PTN_PTPRZ1	PTN - PTPRZ1	PTN	Secreted Signaling	PMID: 28356350; PMID: 25620911	NL	-0.113441	30.7362	42.6476	1.50925e-17	NA	NA	NA	NA
549	Smooth_muscle_1	Layer_2-4_ExN	PTN	PTPRZ1	1.01856e-05	0	PTN_PTPRZ1	PTN - PTPRZ1	PTN	Secreted Signaling	PMID: 28356350; PMID: 25620911	NL	-0.877426	71.4286	81.3953	0.0151054	NA	NA	NA	NA
550	Layer_4-5_ExN	Layer_2-4_ExN	PTN	PTPRZ1	7.7736e-07	0	PTN_PTPRZ1	PTN - PTPRZ1	PTN	Secreted Signaling	PMID: 28356350; PMID: 25620911	NL	-0.198625	32.8958	48.6762	4.93885e-08	NA	NA	NA	NA
551	Mig_Layer_2-3_ExN	Astrocyte_progenitors	PTN	PTPRZ1	8.12163e-07	0	PTN_PTPRZ1	PTN - PTPRZ1	PTN	Secreted Signaling	PMID: 28356350; PMID: 25620911	NL	-0.115145	28.2182	37.6415	1.15989e-72	3.78259	94.0476	86.1033	5.7735e-58
552	Layer_2-4_ExN	Astrocyte_progenitors	PTN	PTPRZ1	8.26882e-07	0	PTN_PTPRZ1	PTN - PTPRZ1	PTN	Secreted Signaling	PMID: 28356350; PMID: 25620911	NL	-0.140086	31.7318	38.8862	2.51992e-20	3.78259	94.0476	86.1033	5.7735e-58
553	Astrocyte_progenitors	Astrocyte_progenitors	PTN	PTPRZ1	2.8887e-05	0	PTN_PTPRZ1	PTN - PTPRZ1	PTN	Secreted Signaling	PMID: 28356350; PMID: 25620911	NL	-3.33276	83.1845	89.3897	3.50741e-37	3.78259	94.0476	86.1033	5.7735e-58
554	Mig_Layer_2-4_ExN	Astrocyte_progenitors	PTN	PTPRZ1	8.62337e-07	0	PTN_PTPRZ1	PTN - PTPRZ1	PTN	Secreted Signaling	PMID: 28356350; PMID: 25620911	NL	-0.171772	32.4001	46.2046	2.40283e-29	3.78259	94.0476	86.1033	5.7735e-58
555	IP	Astrocyte_progenitors	PTN	PTPRZ1	9.96747e-07	0	PTN_PTPRZ1	PTN - PTPRZ1	PTN	Secreted Signaling	PMID: 28356350; PMID: 25620911	NL	-0.195073	38.4662	43.498	2.12785e-05	3.78259	94.0476	86.1033	5.7735e-58
556	oRG	Astrocyte_progenitors	PTN	PTPRZ1	1.10243e-05	0	PTN_PTPRZ1	PTN - PTPRZ1	PTN	Secreted Signaling	PMID: 28356350; PMID: 25620911	NL	-1.53215	87.5549	71.2642	2.13527e-24	3.78259	94.0476	86.1033	5.7735e-58
557	vRG	Astrocyte_progenitors	PTN	PTPRZ1	8.1289e-06	0	PTN_PTPRZ1	PTN - PTPRZ1	PTN	Secreted Signaling	PMID: 28356350; PMID: 25620911	NL	-0.958902	69.332	75.7261	0.00284976	3.78259	94.0476	86.1033	5.7735e-58
558	Cycling_progenitors	Astrocyte_progenitors	PTN	PTPRZ1	1.86809e-06	0	PTN_PTPRZ1	PTN - PTPRZ1	PTN	Secreted Signaling	PMID: 28356350; PMID: 25620911	NL	-0.267752	58.9003	48	2.1354e-10	3.78259	94.0476	86.1033	5.7735e-58
559	Layer_4-6_ExN	Astrocyte_progenitors	PTN	PTPRZ1	8.0043e-07	0	PTN_PTPRZ1	PTN - PTPRZ1	PTN	Secreted Signaling	PMID: 28356350; PMID: 25620911	NL	-0.104666	33.6968	44.2484	8.24442e-14	3.78259	94.0476	86.1033	5.7735e-58
560	Layer_5-6_ExN	Astrocyte_progenitors	PTN	PTPRZ1	7.42681e-07	0	PTN_PTPRZ1	PTN - PTPRZ1	PTN	Secreted Signaling	PMID: 28356350; PMID: 25620911	NL	-0.113441	30.7362	42.6476	1.50925e-17	3.78259	94.0476	86.1033	5.7735e-58
561	Smooth_muscle_1	Astrocyte_progenitors	PTN	PTPRZ1	1.14788e-05	0	PTN_PTPRZ1	PTN - PTPRZ1	PTN	Secreted Signaling	PMID: 28356350; PMID: 25620911	NL	-0.877426	71.4286	81.3953	0.0151054	3.78259	94.0476	86.1033	5.7735e-58
562	Layer_4-5_ExN	Astrocyte_progenitors	PTN	PTPRZ1	8.76057e-07	0	PTN_PTPRZ1	PTN - PTPRZ1	PTN	Secreted Signaling	PMID: 28356350; PMID: 25620911	NL	-0.198625	32.8958	48.6762	4.93885e-08	3.78259	94.0476	86.1033	5.7735e-58
563	Mig_Layer_2-3_ExN	Mig_Layer_2-4_ExN	PTN	PTPRZ1	8.67648e-07	0	PTN_PTPRZ1	PTN - PTPRZ1	PTN	Secreted Signaling	PMID: 28356350; PMID: 25620911	NL	-0.115145	28.2182	37.6415	1.15989e-72	-0.509433	90.2009	90.231	3.6217e-08
564	Layer_2-4_ExN	Mig_Layer_2-4_ExN	PTN	PTPRZ1	8.83373e-07	0	PTN_PTPRZ1	PTN - PTPRZ1	PTN	Secreted Signaling	PMID: 28356350; PMID: 25620911	NL	-0.140086	31.7318	38.8862	2.51992e-20	-0.509433	90.2009	90.231	3.6217e-08
565	Astrocyte_progenitors	Mig_Layer_2-4_ExN	PTN	PTPRZ1	3.08604e-05	0	PTN_PTPRZ1	PTN - PTPRZ1	PTN	Secreted Signaling	PMID: 28356350; PMID: 25620911	NL	-3.33276	83.1845	89.3897	3.50741e-37	-0.509433	90.2009	90.231	3.6217e-08
566	Mig_Layer_2-4_ExN	Mig_Layer_2-4_ExN	PTN	PTPRZ1	9.2125e-07	0	PTN_PTPRZ1	PTN - PTPRZ1	PTN	Secreted Signaling	PMID: 28356350; PMID: 25620911	NL	-0.171772	32.4001	46.2046	2.40283e-29	-0.509433	90.2009	90.231	3.6217e-08
567	IP	Mig_Layer_2-4_ExN	PTN	PTPRZ1	1.06484e-06	0	PTN_PTPRZ1	PTN - PTPRZ1	PTN	Secreted Signaling	PMID: 28356350; PMID: 25620911	NL	-0.195073	38.4662	43.498	2.12785e-05	-0.509433	90.2009	90.231	3.6217e-08
568	oRG	Mig_Layer_2-4_ExN	PTN	PTPRZ1	1.17775e-05	0	PTN_PTPRZ1	PTN - PTPRZ1	PTN	Secreted Signaling	PMID: 28356350; PMID: 25620911	NL	-1.53215	87.5549	71.2642	2.13527e-24	-0.509433	90.2009	90.231	3.6217e-08
569	vRG	Mig_Layer_2-4_ExN	PTN	PTPRZ1	8.68426e-06	0	PTN_PTPRZ1	PTN - PTPRZ1	PTN	Secreted Signaling	PMID: 28356350; PMID: 25620911	NL	-0.958902	69.332	75.7261	0.00284976	-0.509433	90.2009	90.231	3.6217e-08
570	Cycling_progenitors	Mig_Layer_2-4_ExN	PTN	PTPRZ1	1.99571e-06	0	PTN_PTPRZ1	PTN - PTPRZ1	PTN	Secreted Signaling	PMID: 28356350; PMID: 25620911	NL	-0.267752	58.9003	48	2.1354e-10	-0.509433	90.2009	90.231	3.6217e-08
571	Layer_4-6_ExN	Mig_Layer_2-4_ExN	PTN	PTPRZ1	8.55114e-07	0	PTN_PTPRZ1	PTN - PTPRZ1	PTN	Secreted Signaling	PMID: 28356350; PMID: 25620911	NL	-0.104666	33.6968	44.2484	8.24442e-14	-0.509433	90.2009	90.231	3.6217e-08
572	Layer_5-6_ExN	Mig_Layer_2-4_ExN	PTN	PTPRZ1	7.93419e-07	0	PTN_PTPRZ1	PTN - PTPRZ1	PTN	Secreted Signaling	PMID: 28356350; PMID: 25620911	NL	-0.113441	30.7362	42.6476	1.50925e-17	-0.509433	90.2009	90.231	3.6217e-08
573	Smooth_muscle_1	Mig_Layer_2-4_ExN	PTN	PTPRZ1	1.2263e-05	0	PTN_PTPRZ1	PTN - PTPRZ1	PTN	Secreted Signaling	PMID: 28356350; PMID: 25620911	NL	-0.877426	71.4286	81.3953	0.0151054	-0.509433	90.2009	90.231	3.6217e-08
574	Layer_4-5_ExN	Mig_Layer_2-4_ExN	PTN	PTPRZ1	9.35908e-07	0	PTN_PTPRZ1	PTN - PTPRZ1	PTN	Secreted Signaling	PMID: 28356350; PMID: 25620911	NL	-0.198625	32.8958	48.6762	4.93885e-08	-0.509433	90.2009	90.231	3.6217e-08
575	Astrocyte_progenitors	IP	PTN	PTPRZ1	8.42542e-06	0	PTN_PTPRZ1	PTN - PTPRZ1	PTN	Secreted Signaling	PMID: 28356350; PMID: 25620911	NL	-3.33276	83.1845	89.3897	3.50741e-37	-0.05817	68.8771	65.2542	0.00970199
576	oRG	IP	PTN	PTPRZ1	3.21541e-06	0	PTN_PTPRZ1	PTN - PTPRZ1	PTN	Secreted Signaling	PMID: 28356350; PMID: 25620911	NL	-1.53215	87.5549	71.2642	2.13527e-24	-0.05817	68.8771	65.2542	0.00970199
577	vRG	IP	PTN	PTPRZ1	2.37091e-06	0	PTN_PTPRZ1	PTN - PTPRZ1	PTN	Secreted Signaling	PMID: 28356350; PMID: 25620911	NL	-0.958902	69.332	75.7261	0.00284976	-0.05817	68.8771	65.2542	0.00970199
578	Cycling_progenitors	IP	PTN	PTPRZ1	5.44852e-07	0	PTN_PTPRZ1	PTN - PTPRZ1	PTN	Secreted Signaling	PMID: 28356350; PMID: 25620911	NL	-0.267752	58.9003	48	2.1354e-10	-0.05817	68.8771	65.2542	0.00970199
579	Smooth_muscle_1	IP	PTN	PTPRZ1	3.34796e-06	0	PTN_PTPRZ1	PTN - PTPRZ1	PTN	Secreted Signaling	PMID: 28356350; PMID: 25620911	NL	-0.877426	71.4286	81.3953	0.0151054	-0.05817	68.8771	65.2542	0.00970199
580	Mig_Layer_2-3_ExN	oRG	PTN	PTPRZ1	1.21257e-06	0	PTN_PTPRZ1	PTN - PTPRZ1	PTN	Secreted Signaling	PMID: 28356350; PMID: 25620911	NL	-0.115145	28.2182	37.6415	1.15989e-72	NA	NA	NA	NA
581	Layer_2-4_ExN	oRG	PTN	PTPRZ1	1.23454e-06	0	PTN_PTPRZ1	PTN - PTPRZ1	PTN	Secreted Signaling	PMID: 28356350; PMID: 25620911	NL	-0.140086	31.7318	38.8862	2.51992e-20	NA	NA	NA	NA
582	Astrocyte_progenitors	oRG	PTN	PTPRZ1	4.31279e-05	0	PTN_PTPRZ1	PTN - PTPRZ1	PTN	Secreted Signaling	PMID: 28356350; PMID: 25620911	NL	-3.33276	83.1845	89.3897	3.50741e-37	NA	NA	NA	NA
583	Mig_Layer_2-4_ExN	oRG	PTN	PTPRZ1	1.28748e-06	0	PTN_PTPRZ1	PTN - PTPRZ1	PTN	Secreted Signaling	PMID: 28356350; PMID: 25620911	NL	-0.171772	32.4001	46.2046	2.40283e-29	NA	NA	NA	NA
584	IP	oRG	PTN	PTPRZ1	1.48815e-06	0	PTN_PTPRZ1	PTN - PTPRZ1	PTN	Secreted Signaling	PMID: 28356350; PMID: 25620911	NL	-0.195073	38.4662	43.498	2.12785e-05	NA	NA	NA	NA
585	oRG	oRG	PTN	PTPRZ1	1.64594e-05	0	PTN_PTPRZ1	PTN - PTPRZ1	PTN	Secreted Signaling	PMID: 28356350; PMID: 25620911	NL	-1.53215	87.5549	71.2642	2.13527e-24	NA	NA	NA	NA
586	vRG	oRG	PTN	PTPRZ1	1.21365e-05	0	PTN_PTPRZ1	PTN - PTPRZ1	PTN	Secreted Signaling	PMID: 28356350; PMID: 25620911	NL	-0.958902	69.332	75.7261	0.00284976	NA	NA	NA	NA
587	Cycling_progenitors	oRG	PTN	PTPRZ1	2.78907e-06	0	PTN_PTPRZ1	PTN - PTPRZ1	PTN	Secreted Signaling	PMID: 28356350; PMID: 25620911	NL	-0.267752	58.9003	48	2.1354e-10	NA	NA	NA	NA
588	Layer_4-6_ExN	oRG	PTN	PTPRZ1	1.19505e-06	0	PTN_PTPRZ1	PTN - PTPRZ1	PTN	Secreted Signaling	PMID: 28356350; PMID: 25620911	NL	-0.104666	33.6968	44.2484	8.24442e-14	NA	NA	NA	NA
589	Interneuron_3	oRG	PTN	PTPRZ1	4.61211e-07	0	PTN_PTPRZ1	PTN - PTPRZ1	PTN	Secreted Signaling	PMID: 28356350; PMID: 25620911	NL	-0.0667606	19.2547	25.4902	0.00663257	NA	NA	NA	NA
590	Layer_5-6_ExN	oRG	PTN	PTPRZ1	1.10883e-06	0	PTN_PTPRZ1	PTN - PTPRZ1	PTN	Secreted Signaling	PMID: 28356350; PMID: 25620911	NL	-0.113441	30.7362	42.6476	1.50925e-17	NA	NA	NA	NA
591	Smooth_muscle_1	oRG	PTN	PTPRZ1	1.71378e-05	0	PTN_PTPRZ1	PTN - PTPRZ1	PTN	Secreted Signaling	PMID: 28356350; PMID: 25620911	NL	-0.877426	71.4286	81.3953	0.0151054	NA	NA	NA	NA
592	Layer_4-5_ExN	oRG	PTN	PTPRZ1	1.30796e-06	0	PTN_PTPRZ1	PTN - PTPRZ1	PTN	Secreted Signaling	PMID: 28356350; PMID: 25620911	NL	-0.198625	32.8958	48.6762	4.93885e-08	NA	NA	NA	NA
593	Mig_Layer_2-3_ExN	vRG	PTN	PTPRZ1	7.66149e-07	0	PTN_PTPRZ1	PTN - PTPRZ1	PTN	Secreted Signaling	PMID: 28356350; PMID: 25620911	NL	-0.115145	28.2182	37.6415	1.15989e-72	-1.10562	86.5385	90.4564	1.75219e-05
594	Layer_2-4_ExN	vRG	PTN	PTPRZ1	7.80035e-07	0	PTN_PTPRZ1	PTN - PTPRZ1	PTN	Secreted Signaling	PMID: 28356350; PMID: 25620911	NL	-0.140086	31.7318	38.8862	2.51992e-20	-1.10562	86.5385	90.4564	1.75219e-05
595	Astrocyte_progenitors	vRG	PTN	PTPRZ1	2.72504e-05	0	PTN_PTPRZ1	PTN - PTPRZ1	PTN	Secreted Signaling	PMID: 28356350; PMID: 25620911	NL	-3.33276	83.1845	89.3897	3.50741e-37	-1.10562	86.5385	90.4564	1.75219e-05
596	Mig_Layer_2-4_ExN	vRG	PTN	PTPRZ1	8.1348e-07	0	PTN_PTPRZ1	PTN - PTPRZ1	PTN	Secreted Signaling	PMID: 28356350; PMID: 25620911	NL	-0.171772	32.4001	46.2046	2.40283e-29	-1.10562	86.5385	90.4564	1.75219e-05
597	IP	vRG	PTN	PTPRZ1	9.40275e-07	0	PTN_PTPRZ1	PTN - PTPRZ1	PTN	Secreted Signaling	PMID: 28356350; PMID: 25620911	NL	-0.195073	38.4662	43.498	2.12785e-05	-1.10562	86.5385	90.4564	1.75219e-05
598	oRG	vRG	PTN	PTPRZ1	1.03998e-05	0	PTN_PTPRZ1	PTN - PTPRZ1	PTN	Secreted Signaling	PMID: 28356350; PMID: 25620911	NL	-1.53215	87.5549	71.2642	2.13527e-24	-1.10562	86.5385	90.4564	1.75219e-05
599	vRG	vRG	PTN	PTPRZ1	7.66836e-06	0	PTN_PTPRZ1	PTN - PTPRZ1	PTN	Secreted Signaling	PMID: 28356350; PMID: 25620911	NL	-0.958902	69.332	75.7261	0.00284976	-1.10562	86.5385	90.4564	1.75219e-05
600	Cycling_progenitors	vRG	PTN	PTPRZ1	1.76225e-06	0	PTN_PTPRZ1	PTN - PTPRZ1	PTN	Secreted Signaling	PMID: 28356350; PMID: 25620911	NL	-0.267752	58.9003	48	2.1354e-10	-1.10562	86.5385	90.4564	1.75219e-05
601	Layer_4-6_ExN	vRG	PTN	PTPRZ1	7.55081e-07	0	PTN_PTPRZ1	PTN - PTPRZ1	PTN	Secreted Signaling	PMID: 28356350; PMID: 25620911	NL	-0.104666	33.6968	44.2484	8.24442e-14	-1.10562	86.5385	90.4564	1.75219e-05
602	Layer_5-6_ExN	vRG	PTN	PTPRZ1	7.00604e-07	0	PTN_PTPRZ1	PTN - PTPRZ1	PTN	Secreted Signaling	PMID: 28356350; PMID: 25620911	NL	-0.113441	30.7362	42.6476	1.50925e-17	-1.10562	86.5385	90.4564	1.75219e-05
603	Smooth_muscle_1	vRG	PTN	PTPRZ1	1.08285e-05	0	PTN_PTPRZ1	PTN - PTPRZ1	PTN	Secreted Signaling	PMID: 28356350; PMID: 25620911	NL	-0.877426	71.4286	81.3953	0.0151054	-1.10562	86.5385	90.4564	1.75219e-05
604	Layer_4-5_ExN	vRG	PTN	PTPRZ1	8.26424e-07	0	PTN_PTPRZ1	PTN - PTPRZ1	PTN	Secreted Signaling	PMID: 28356350; PMID: 25620911	NL	-0.198625	32.8958	48.6762	4.93885e-08	-1.10562	86.5385	90.4564	1.75219e-05
605	Astrocyte_progenitors	Interneuron_1	PTN	PTPRZ1	8.82418e-07	0	PTN_PTPRZ1	PTN - PTPRZ1	PTN	Secreted Signaling	PMID: 28356350; PMID: 25620911	NL	-3.33276	83.1845	89.3897	3.50741e-37	NA	NA	NA	NA
606	Astrocyte_progenitors	Cycling_progenitors	PTN	PTPRZ1	1.07123e-05	0	PTN_PTPRZ1	PTN - PTPRZ1	PTN	Secreted Signaling	PMID: 28356350; PMID: 25620911	NL	-3.33276	83.1845	89.3897	3.50741e-37	0.967495	86.1137	70.0556	4.25222e-31
607	IP	Cycling_progenitors	PTN	PTPRZ1	3.69621e-07	0	PTN_PTPRZ1	PTN - PTPRZ1	PTN	Secreted Signaling	PMID: 28356350; PMID: 25620911	NL	-0.195073	38.4662	43.498	2.12785e-05	0.967495	86.1137	70.0556	4.25222e-31
608	oRG	Cycling_progenitors	PTN	PTPRZ1	4.08816e-06	0	PTN_PTPRZ1	PTN - PTPRZ1	PTN	Secreted Signaling	PMID: 28356350; PMID: 25620911	NL	-1.53215	87.5549	71.2642	2.13527e-24	0.967495	86.1137	70.0556	4.25222e-31
609	vRG	Cycling_progenitors	PTN	PTPRZ1	3.01444e-06	0	PTN_PTPRZ1	PTN - PTPRZ1	PTN	Secreted Signaling	PMID: 28356350; PMID: 25620911	NL	-0.958902	69.332	75.7261	0.00284976	0.967495	86.1137	70.0556	4.25222e-31
610	Cycling_progenitors	Cycling_progenitors	PTN	PTPRZ1	6.92739e-07	0	PTN_PTPRZ1	PTN - PTPRZ1	PTN	Secreted Signaling	PMID: 28356350; PMID: 25620911	NL	-0.267752	58.9003	48	2.1354e-10	0.967495	86.1137	70.0556	4.25222e-31
611	Smooth_muscle_1	Cycling_progenitors	PTN	PTPRZ1	4.25668e-06	0	PTN_PTPRZ1	PTN - PTPRZ1	PTN	Secreted Signaling	PMID: 28356350; PMID: 25620911	NL	-0.877426	71.4286	81.3953	0.0151054	0.967495	86.1137	70.0556	4.25222e-31
612	Mig_Layer_2-3_ExN	Layer_4-6_ExN	PTN	PTPRZ1	6.76824e-07	0	PTN_PTPRZ1	PTN - PTPRZ1	PTN	Secreted Signaling	PMID: 28356350; PMID: 25620911	NL	-0.115145	28.2182	37.6415	1.15989e-72	-0.682583	87.0479	83.5722	9.86661e-06
613	Layer_2-4_ExN	Layer_4-6_ExN	PTN	PTPRZ1	6.8909e-07	0	PTN_PTPRZ1	PTN - PTPRZ1	PTN	Secreted Signaling	PMID: 28356350; PMID: 25620911	NL	-0.140086	31.7318	38.8862	2.51992e-20	-0.682583	87.0479	83.5722	9.86661e-06
614	Astrocyte_progenitors	Layer_4-6_ExN	PTN	PTPRZ1	2.40734e-05	0	PTN_PTPRZ1	PTN - PTPRZ1	PTN	Secreted Signaling	PMID: 28356350; PMID: 25620911	NL	-3.33276	83.1845	89.3897	3.50741e-37	-0.682583	87.0479	83.5722	9.86661e-06
615	Mig_Layer_2-4_ExN	Layer_4-6_ExN	PTN	PTPRZ1	7.18637e-07	0	PTN_PTPRZ1	PTN - PTPRZ1	PTN	Secreted Signaling	PMID: 28356350; PMID: 25620911	NL	-0.171772	32.4001	46.2046	2.40283e-29	-0.682583	87.0479	83.5722	9.86661e-06
616	IP	Layer_4-6_ExN	PTN	PTPRZ1	8.30649e-07	0	PTN_PTPRZ1	PTN - PTPRZ1	PTN	Secreted Signaling	PMID: 28356350; PMID: 25620911	NL	-0.195073	38.4662	43.498	2.12785e-05	-0.682583	87.0479	83.5722	9.86661e-06
617	oRG	Layer_4-6_ExN	PTN	PTPRZ1	9.18726e-06	0	PTN_PTPRZ1	PTN - PTPRZ1	PTN	Secreted Signaling	PMID: 28356350; PMID: 25620911	NL	-1.53215	87.5549	71.2642	2.13527e-24	-0.682583	87.0479	83.5722	9.86661e-06
618	vRG	Layer_4-6_ExN	PTN	PTPRZ1	6.77431e-06	0	PTN_PTPRZ1	PTN - PTPRZ1	PTN	Secreted Signaling	PMID: 28356350; PMID: 25620911	NL	-0.958902	69.332	75.7261	0.00284976	-0.682583	87.0479	83.5722	9.86661e-06
619	Cycling_progenitors	Layer_4-6_ExN	PTN	PTPRZ1	1.55679e-06	0	PTN_PTPRZ1	PTN - PTPRZ1	PTN	Secreted Signaling	PMID: 28356350; PMID: 25620911	NL	-0.267752	58.9003	48	2.1354e-10	-0.682583	87.0479	83.5722	9.86661e-06
620	Layer_4-6_ExN	Layer_4-6_ExN	PTN	PTPRZ1	6.67046e-07	0	PTN_PTPRZ1	PTN - PTPRZ1	PTN	Secreted Signaling	PMID: 28356350; PMID: 25620911	NL	-0.104666	33.6968	44.2484	8.24442e-14	-0.682583	87.0479	83.5722	9.86661e-06
621	Layer_5-6_ExN	Layer_4-6_ExN	PTN	PTPRZ1	6.1892e-07	0	PTN_PTPRZ1	PTN - PTPRZ1	PTN	Secreted Signaling	PMID: 28356350; PMID: 25620911	NL	-0.113441	30.7362	42.6476	1.50925e-17	-0.682583	87.0479	83.5722	9.86661e-06
622	Smooth_muscle_1	Layer_4-6_ExN	PTN	PTPRZ1	9.56597e-06	0	PTN_PTPRZ1	PTN - PTPRZ1	PTN	Secreted Signaling	PMID: 28356350; PMID: 25620911	NL	-0.877426	71.4286	81.3953	0.0151054	-0.682583	87.0479	83.5722	9.86661e-06
623	Layer_4-5_ExN	Layer_4-6_ExN	PTN	PTPRZ1	7.30071e-07	0	PTN_PTPRZ1	PTN - PTPRZ1	PTN	Secreted Signaling	PMID: 28356350; PMID: 25620911	NL	-0.198625	32.8958	48.6762	4.93885e-08	-0.682583	87.0479	83.5722	9.86661e-06
624	Astrocyte_progenitors	Interneuron_3	PTN	PTPRZ1	1.09176e-06	0	PTN_PTPRZ1	PTN - PTPRZ1	PTN	Secreted Signaling	PMID: 28356350; PMID: 25620911	NL	-3.33276	83.1845	89.3897	3.50741e-37	NA	NA	NA	NA
625	oRG	Interneuron_3	PTN	PTPRZ1	4.16651e-07	0	PTN_PTPRZ1	PTN - PTPRZ1	PTN	Secreted Signaling	PMID: 28356350; PMID: 25620911	NL	-1.53215	87.5549	71.2642	2.13527e-24	NA	NA	NA	NA
626	Astrocyte_progenitors	Microglia_1	PTN	PTPRZ1	1.99186e-06	0	PTN_PTPRZ1	PTN - PTPRZ1	PTN	Secreted Signaling	PMID: 28356350; PMID: 25620911	NL	-3.33276	83.1845	89.3897	3.50741e-37	NA	NA	NA	NA
627	oRG	Microglia_1	PTN	PTPRZ1	7.60156e-07	0	PTN_PTPRZ1	PTN - PTPRZ1	PTN	Secreted Signaling	PMID: 28356350; PMID: 25620911	NL	-1.53215	87.5549	71.2642	2.13527e-24	NA	NA	NA	NA
628	vRG	Microglia_1	PTN	PTPRZ1	5.60507e-07	0	PTN_PTPRZ1	PTN - PTPRZ1	PTN	Secreted Signaling	PMID: 28356350; PMID: 25620911	NL	-0.958902	69.332	75.7261	0.00284976	NA	NA	NA	NA
629	Mig_Layer_2-3_ExN	Layer_5-6_ExN	PTN	PTPRZ1	7.15194e-07	0	PTN_PTPRZ1	PTN - PTPRZ1	PTN	Secreted Signaling	PMID: 28356350; PMID: 25620911	NL	-0.115145	28.2182	37.6415	1.15989e-72	-0.603811	86.8712	88.7789	5.32199e-10
630	Layer_2-4_ExN	Layer_5-6_ExN	PTN	PTPRZ1	7.28156e-07	0	PTN_PTPRZ1	PTN - PTPRZ1	PTN	Secreted Signaling	PMID: 28356350; PMID: 25620911	NL	-0.140086	31.7318	38.8862	2.51992e-20	-0.603811	86.8712	88.7789	5.32199e-10
631	Astrocyte_progenitors	Layer_5-6_ExN	PTN	PTPRZ1	2.54381e-05	0	PTN_PTPRZ1	PTN - PTPRZ1	PTN	Secreted Signaling	PMID: 28356350; PMID: 25620911	NL	-3.33276	83.1845	89.3897	3.50741e-37	-0.603811	86.8712	88.7789	5.32199e-10
632	Mig_Layer_2-4_ExN	Layer_5-6_ExN	PTN	PTPRZ1	7.59378e-07	0	PTN_PTPRZ1	PTN - PTPRZ1	PTN	Secreted Signaling	PMID: 28356350; PMID: 25620911	NL	-0.171772	32.4001	46.2046	2.40283e-29	-0.603811	86.8712	88.7789	5.32199e-10
633	IP	Layer_5-6_ExN	PTN	PTPRZ1	8.7774e-07	0	PTN_PTPRZ1	PTN - PTPRZ1	PTN	Secreted Signaling	PMID: 28356350; PMID: 25620911	NL	-0.195073	38.4662	43.498	2.12785e-05	-0.603811	86.8712	88.7789	5.32199e-10
634	oRG	Layer_5-6_ExN	PTN	PTPRZ1	9.7081e-06	0	PTN_PTPRZ1	PTN - PTPRZ1	PTN	Secreted Signaling	PMID: 28356350; PMID: 25620911	NL	-1.53215	87.5549	71.2642	2.13527e-24	-0.603811	86.8712	88.7789	5.32199e-10
635	vRG	Layer_5-6_ExN	PTN	PTPRZ1	7.15836e-06	0	PTN_PTPRZ1	PTN - PTPRZ1	PTN	Secreted Signaling	PMID: 28356350; PMID: 25620911	NL	-0.958902	69.332	75.7261	0.00284976	-0.603811	86.8712	88.7789	5.32199e-10
636	Cycling_progenitors	Layer_5-6_ExN	PTN	PTPRZ1	1.64505e-06	0	PTN_PTPRZ1	PTN - PTPRZ1	PTN	Secreted Signaling	PMID: 28356350; PMID: 25620911	NL	-0.267752	58.9003	48	2.1354e-10	-0.603811	86.8712	88.7789	5.32199e-10
637	Layer_4-6_ExN	Layer_5-6_ExN	PTN	PTPRZ1	7.04862e-07	0	PTN_PTPRZ1	PTN - PTPRZ1	PTN	Secreted Signaling	PMID: 28356350; PMID: 25620911	NL	-0.104666	33.6968	44.2484	8.24442e-14	-0.603811	86.8712	88.7789	5.32199e-10
638	Layer_5-6_ExN	Layer_5-6_ExN	PTN	PTPRZ1	6.54008e-07	0	PTN_PTPRZ1	PTN - PTPRZ1	PTN	Secreted Signaling	PMID: 28356350; PMID: 25620911	NL	-0.113441	30.7362	42.6476	1.50925e-17	-0.603811	86.8712	88.7789	5.32199e-10
639	Smooth_muscle_1	Layer_5-6_ExN	PTN	PTPRZ1	1.01083e-05	0	PTN_PTPRZ1	PTN - PTPRZ1	PTN	Secreted Signaling	PMID: 28356350; PMID: 25620911	NL	-0.877426	71.4286	81.3953	0.0151054	-0.603811	86.8712	88.7789	5.32199e-10
640	Layer_4-5_ExN	Layer_5-6_ExN	PTN	PTPRZ1	7.7146e-07	0	PTN_PTPRZ1	PTN - PTPRZ1	PTN	Secreted Signaling	PMID: 28356350; PMID: 25620911	NL	-0.198625	32.8958	48.6762	4.93885e-08	-0.603811	86.8712	88.7789	5.32199e-10
641	Mig_Layer_2-3_ExN	OPC_1	PTN	PTPRZ1	2.68741e-06	0	PTN_PTPRZ1	PTN - PTPRZ1	PTN	Secreted Signaling	PMID: 28356350; PMID: 25620911	NL	-0.115145	28.2182	37.6415	1.15989e-72	-3.03465	99.0724	98.524	4.97845e-07
642	Layer_2-4_ExN	OPC_1	PTN	PTPRZ1	2.73612e-06	0	PTN_PTPRZ1	PTN - PTPRZ1	PTN	Secreted Signaling	PMID: 28356350; PMID: 25620911	NL	-0.140086	31.7318	38.8862	2.51992e-20	-3.03465	99.0724	98.524	4.97845e-07
643	Astrocyte_progenitors	OPC_1	PTN	PTPRZ1	9.55796e-05	0	PTN_PTPRZ1	PTN - PTPRZ1	PTN	Secreted Signaling	PMID: 28356350; PMID: 25620911	NL	-3.33276	83.1845	89.3897	3.50741e-37	-3.03465	99.0724	98.524	4.97845e-07
644	Mig_Layer_2-4_ExN	OPC_1	PTN	PTPRZ1	2.85344e-06	0	PTN_PTPRZ1	PTN - PTPRZ1	PTN	Secreted Signaling	PMID: 28356350; PMID: 25620911	NL	-0.171772	32.4001	46.2046	2.40283e-29	-3.03465	99.0724	98.524	4.97845e-07
645	IP	OPC_1	PTN	PTPRZ1	3.29819e-06	0	PTN_PTPRZ1	PTN - PTPRZ1	PTN	Secreted Signaling	PMID: 28356350; PMID: 25620911	NL	-0.195073	38.4662	43.498	2.12785e-05	-3.03465	99.0724	98.524	4.97845e-07
646	oRG	OPC_1	PTN	PTPRZ1	3.64782e-05	0	PTN_PTPRZ1	PTN - PTPRZ1	PTN	Secreted Signaling	PMID: 28356350; PMID: 25620911	NL	-1.53215	87.5549	71.2642	2.13527e-24	-3.03465	99.0724	98.524	4.97845e-07
647	vRG	OPC_1	PTN	PTPRZ1	2.68978e-05	0	PTN_PTPRZ1	PTN - PTPRZ1	PTN	Secreted Signaling	PMID: 28356350; PMID: 25620911	NL	-0.958902	69.332	75.7261	0.00284976	-3.03465	99.0724	98.524	4.97845e-07
648	Cycling_progenitors	OPC_1	PTN	PTPRZ1	6.18141e-06	0	PTN_PTPRZ1	PTN - PTPRZ1	PTN	Secreted Signaling	PMID: 28356350; PMID: 25620911	NL	-0.267752	58.9003	48	2.1354e-10	-3.03465	99.0724	98.524	4.97845e-07
649	Layer_4-6_ExN	OPC_1	PTN	PTPRZ1	2.64859e-06	0	PTN_PTPRZ1	PTN - PTPRZ1	PTN	Secreted Signaling	PMID: 28356350; PMID: 25620911	NL	-0.104666	33.6968	44.2484	8.24442e-14	-3.03465	99.0724	98.524	4.97845e-07
650	Interneuron_3	OPC_1	PTN	PTPRZ1	1.02218e-06	0	PTN_PTPRZ1	PTN - PTPRZ1	PTN	Secreted Signaling	PMID: 28356350; PMID: 25620911	NL	-0.0667606	19.2547	25.4902	0.00663257	-3.03465	99.0724	98.524	4.97845e-07
651	Layer_5-6_ExN	OPC_1	PTN	PTPRZ1	2.4575e-06	0	PTN_PTPRZ1	PTN - PTPRZ1	PTN	Secreted Signaling	PMID: 28356350; PMID: 25620911	NL	-0.113441	30.7362	42.6476	1.50925e-17	-3.03465	99.0724	98.524	4.97845e-07
652	Smooth_muscle_1	OPC_1	PTN	PTPRZ1	3.79819e-05	0	PTN_PTPRZ1	PTN - PTPRZ1	PTN	Secreted Signaling	PMID: 28356350; PMID: 25620911	NL	-0.877426	71.4286	81.3953	0.0151054	-3.03465	99.0724	98.524	4.97845e-07
653	Layer_4-5_ExN	OPC_1	PTN	PTPRZ1	2.89884e-06	0	PTN_PTPRZ1	PTN - PTPRZ1	PTN	Secreted Signaling	PMID: 28356350; PMID: 25620911	NL	-0.198625	32.8958	48.6762	4.93885e-08	-3.03465	99.0724	98.524	4.97845e-07
654	Mig_Layer_2-3_ExN	OL	PTN	PTPRZ1	7.13735e-07	0	PTN_PTPRZ1	PTN - PTPRZ1	PTN	Secreted Signaling	PMID: 28356350; PMID: 25620911	NL	-0.115145	28.2182	37.6415	1.15989e-72	NA	NA	NA	NA
655	Layer_2-4_ExN	OL	PTN	PTPRZ1	7.2667e-07	0	PTN_PTPRZ1	PTN - PTPRZ1	PTN	Secreted Signaling	PMID: 28356350; PMID: 25620911	NL	-0.140086	31.7318	38.8862	2.51992e-20	NA	NA	NA	NA
656	Astrocyte_progenitors	OL	PTN	PTPRZ1	2.53862e-05	0	PTN_PTPRZ1	PTN - PTPRZ1	PTN	Secreted Signaling	PMID: 28356350; PMID: 25620911	NL	-3.33276	83.1845	89.3897	3.50741e-37	NA	NA	NA	NA
657	Mig_Layer_2-4_ExN	OL	PTN	PTPRZ1	7.57828e-07	0	PTN_PTPRZ1	PTN - PTPRZ1	PTN	Secreted Signaling	PMID: 28356350; PMID: 25620911	NL	-0.171772	32.4001	46.2046	2.40283e-29	NA	NA	NA	NA
658	IP	OL	PTN	PTPRZ1	8.75949e-07	0	PTN_PTPRZ1	PTN - PTPRZ1	PTN	Secreted Signaling	PMID: 28356350; PMID: 25620911	NL	-0.195073	38.4662	43.498	2.12785e-05	NA	NA	NA	NA
659	oRG	OL	PTN	PTPRZ1	9.68829e-06	0	PTN_PTPRZ1	PTN - PTPRZ1	PTN	Secreted Signaling	PMID: 28356350; PMID: 25620911	NL	-1.53215	87.5549	71.2642	2.13527e-24	NA	NA	NA	NA
660	vRG	OL	PTN	PTPRZ1	7.14375e-06	0	PTN_PTPRZ1	PTN - PTPRZ1	PTN	Secreted Signaling	PMID: 28356350; PMID: 25620911	NL	-0.958902	69.332	75.7261	0.00284976	NA	NA	NA	NA
661	Cycling_progenitors	OL	PTN	PTPRZ1	1.64169e-06	0	PTN_PTPRZ1	PTN - PTPRZ1	PTN	Secreted Signaling	PMID: 28356350; PMID: 25620911	NL	-0.267752	58.9003	48	2.1354e-10	NA	NA	NA	NA
662	Layer_4-6_ExN	OL	PTN	PTPRZ1	7.03424e-07	0.01	PTN_PTPRZ1	PTN - PTPRZ1	PTN	Secreted Signaling	PMID: 28356350; PMID: 25620911	NL	-0.104666	33.6968	44.2484	8.24442e-14	NA	NA	NA	NA
663	Layer_5-6_ExN	OL	PTN	PTPRZ1	6.52673e-07	0.01	PTN_PTPRZ1	PTN - PTPRZ1	PTN	Secreted Signaling	PMID: 28356350; PMID: 25620911	NL	-0.113441	30.7362	42.6476	1.50925e-17	NA	NA	NA	NA
664	Smooth_muscle_1	OL	PTN	PTPRZ1	1.00877e-05	0	PTN_PTPRZ1	PTN - PTPRZ1	PTN	Secreted Signaling	PMID: 28356350; PMID: 25620911	NL	-0.877426	71.4286	81.3953	0.0151054	NA	NA	NA	NA
665	Layer_4-5_ExN	OL	PTN	PTPRZ1	7.69886e-07	0	PTN_PTPRZ1	PTN - PTPRZ1	PTN	Secreted Signaling	PMID: 28356350; PMID: 25620911	NL	-0.198625	32.8958	48.6762	4.93885e-08	NA	NA	NA	NA
666	Astrocyte_progenitors	Interneuron_4	PTN	PTPRZ1	9.92749e-07	0	PTN_PTPRZ1	PTN - PTPRZ1	PTN	Secreted Signaling	PMID: 28356350; PMID: 25620911	NL	-3.33276	83.1845	89.3897	3.50741e-37	NA	NA	NA	NA
667	Astrocyte_progenitors	IP_IN	PTN	PTPRZ1	1.7368e-06	0	PTN_PTPRZ1	PTN - PTPRZ1	PTN	Secreted Signaling	PMID: 28356350; PMID: 25620911	NL	-3.33276	83.1845	89.3897	3.50741e-37	0.134652	34.7561	31.006	0.00880493
668	oRG	IP_IN	PTN	PTPRZ1	6.62816e-07	0	PTN_PTPRZ1	PTN - PTPRZ1	PTN	Secreted Signaling	PMID: 28356350; PMID: 25620911	NL	-1.53215	87.5549	71.2642	2.13527e-24	0.134652	34.7561	31.006	0.00880493
669	vRG	IP_IN	PTN	PTPRZ1	4.88733e-07	0	PTN_PTPRZ1	PTN - PTPRZ1	PTN	Secreted Signaling	PMID: 28356350; PMID: 25620911	NL	-0.958902	69.332	75.7261	0.00284976	0.134652	34.7561	31.006	0.00880493
670	Astrocyte_progenitors	Smooth_muscle_1	PTN	PTPRZ1	3.40358e-06	0	PTN_PTPRZ1	PTN - PTPRZ1	PTN	Secreted Signaling	PMID: 28356350; PMID: 25620911	NL	-3.33276	83.1845	89.3897	3.50741e-37	NA	NA	NA	NA
671	oRG	Smooth_muscle_1	PTN	PTPRZ1	1.29891e-06	0	PTN_PTPRZ1	PTN - PTPRZ1	PTN	Secreted Signaling	PMID: 28356350; PMID: 25620911	NL	-1.53215	87.5549	71.2642	2.13527e-24	NA	NA	NA	NA
672	vRG	Smooth_muscle_1	PTN	PTPRZ1	9.57761e-07	0	PTN_PTPRZ1	PTN - PTPRZ1	PTN	Secreted Signaling	PMID: 28356350; PMID: 25620911	NL	-0.958902	69.332	75.7261	0.00284976	NA	NA	NA	NA
673	Smooth_muscle_1	Smooth_muscle_1	PTN	PTPRZ1	1.35245e-06	0.02	PTN_PTPRZ1	PTN - PTPRZ1	PTN	Secreted Signaling	PMID: 28356350; PMID: 25620911	NL	-0.877426	71.4286	81.3953	0.0151054	NA	NA	NA	NA
674	Mig_Layer_2-3_ExN	Layer_4-5_ExN	PTN	PTPRZ1	8.42348e-07	0	PTN_PTPRZ1	PTN - PTPRZ1	PTN	Secreted Signaling	PMID: 28356350; PMID: 25620911	NL	-0.115145	28.2182	37.6415	1.15989e-72	-1.33067	87.9409	90.224	3.05441e-05
675	Layer_2-4_ExN	Layer_4-5_ExN	PTN	PTPRZ1	8.57614e-07	0	PTN_PTPRZ1	PTN - PTPRZ1	PTN	Secreted Signaling	PMID: 28356350; PMID: 25620911	NL	-0.140086	31.7318	38.8862	2.51992e-20	-1.33067	87.9409	90.224	3.05441e-05
676	Astrocyte_progenitors	Layer_4-5_ExN	PTN	PTPRZ1	2.99606e-05	0	PTN_PTPRZ1	PTN - PTPRZ1	PTN	Secreted Signaling	PMID: 28356350; PMID: 25620911	NL	-3.33276	83.1845	89.3897	3.50741e-37	-1.33067	87.9409	90.224	3.05441e-05
677	Mig_Layer_2-4_ExN	Layer_4-5_ExN	PTN	PTPRZ1	8.94386e-07	0	PTN_PTPRZ1	PTN - PTPRZ1	PTN	Secreted Signaling	PMID: 28356350; PMID: 25620911	NL	-0.171772	32.4001	46.2046	2.40283e-29	-1.33067	87.9409	90.224	3.05441e-05
678	IP	Layer_4-5_ExN	PTN	PTPRZ1	1.03379e-06	0	PTN_PTPRZ1	PTN - PTPRZ1	PTN	Secreted Signaling	PMID: 28356350; PMID: 25620911	NL	-0.195073	38.4662	43.498	2.12785e-05	-1.33067	87.9409	90.224	3.05441e-05
679	oRG	Layer_4-5_ExN	PTN	PTPRZ1	1.14341e-05	0	PTN_PTPRZ1	PTN - PTPRZ1	PTN	Secreted Signaling	PMID: 28356350; PMID: 25620911	NL	-1.53215	87.5549	71.2642	2.13527e-24	-1.33067	87.9409	90.224	3.05441e-05
680	vRG	Layer_4-5_ExN	PTN	PTPRZ1	8.43102e-06	0	PTN_PTPRZ1	PTN - PTPRZ1	PTN	Secreted Signaling	PMID: 28356350; PMID: 25620911	NL	-0.958902	69.332	75.7261	0.00284976	-1.33067	87.9409	90.224	3.05441e-05
681	Cycling_progenitors	Layer_4-5_ExN	PTN	PTPRZ1	1.93752e-06	0	PTN_PTPRZ1	PTN - PTPRZ1	PTN	Secreted Signaling	PMID: 28356350; PMID: 25620911	NL	-0.267752	58.9003	48	2.1354e-10	-1.33067	87.9409	90.224	3.05441e-05
682	Layer_4-6_ExN	Layer_4-5_ExN	PTN	PTPRZ1	8.30179e-07	0	PTN_PTPRZ1	PTN - PTPRZ1	PTN	Secreted Signaling	PMID: 28356350; PMID: 25620911	NL	-0.104666	33.6968	44.2484	8.24442e-14	-1.33067	87.9409	90.224	3.05441e-05
683	Layer_5-6_ExN	Layer_4-5_ExN	PTN	PTPRZ1	7.70283e-07	0	PTN_PTPRZ1	PTN - PTPRZ1	PTN	Secreted Signaling	PMID: 28356350; PMID: 25620911	NL	-0.113441	30.7362	42.6476	1.50925e-17	-1.33067	87.9409	90.224	3.05441e-05
684	Smooth_muscle_1	Layer_4-5_ExN	PTN	PTPRZ1	1.19054e-05	0	PTN_PTPRZ1	PTN - PTPRZ1	PTN	Secreted Signaling	PMID: 28356350; PMID: 25620911	NL	-0.877426	71.4286	81.3953	0.0151054	-1.33067	87.9409	90.224	3.05441e-05
685	Layer_4-5_ExN	Layer_4-5_ExN	PTN	PTPRZ1	9.08617e-07	0	PTN_PTPRZ1	PTN - PTPRZ1	PTN	Secreted Signaling	PMID: 28356350; PMID: 25620911	NL	-0.198625	32.8958	48.6762	4.93885e-08	-1.33067	87.9409	90.224	3.05441e-05
686	Astrocyte_progenitors	Interneuron_S1	PTN	PTPRZ1	1.38223e-06	0	PTN_PTPRZ1	PTN - PTPRZ1	PTN	Secreted Signaling	PMID: 28356350; PMID: 25620911	NL	-3.33276	83.1845	89.3897	3.50741e-37	NA	NA	NA	NA
687	oRG	Interneuron_S1	PTN	PTPRZ1	5.27501e-07	0	PTN_PTPRZ1	PTN - PTPRZ1	PTN	Secreted Signaling	PMID: 28356350; PMID: 25620911	NL	-1.53215	87.5549	71.2642	2.13527e-24	NA	NA	NA	NA
688	vRG	Interneuron_S1	PTN	PTPRZ1	3.88957e-07	0.04	PTN_PTPRZ1	PTN - PTPRZ1	PTN	Secreted Signaling	PMID: 28356350; PMID: 25620911	NL	-0.958902	69.332	75.7261	0.00284976	NA	NA	NA	NA
689	Astrocyte_progenitors	Interneuron_S2	PTN	PTPRZ1	1.68599e-06	0	PTN_PTPRZ1	PTN - PTPRZ1	PTN	Secreted Signaling	PMID: 28356350; PMID: 25620911	NL	-3.33276	83.1845	89.3897	3.50741e-37	NA	NA	NA	NA
690	oRG	Interneuron_S2	PTN	PTPRZ1	6.43427e-07	0	PTN_PTPRZ1	PTN - PTPRZ1	PTN	Secreted Signaling	PMID: 28356350; PMID: 25620911	NL	-1.53215	87.5549	71.2642	2.13527e-24	NA	NA	NA	NA
691	vRG	Interneuron_S2	PTN	PTPRZ1	4.74436e-07	0	PTN_PTPRZ1	PTN - PTPRZ1	PTN	Secreted Signaling	PMID: 28356350; PMID: 25620911	NL	-0.958902	69.332	75.7261	0.00284976	NA	NA	NA	NA
692	Mig_Layer_2-3_ExN	Astrocyte_progenitors	PTN	SDC2	6.39452e-08	0	PTN_SDC2	PTN - SDC2	PTN	Secreted Signaling	PMID: 28356350; PMID: 25620911	NL	-0.115145	28.2182	37.6415	1.15989e-72	-0.457087	20.6101	39.9061	5.8311e-22
693	Layer_2-4_ExN	Astrocyte_progenitors	PTN	SDC2	6.51041e-08	0	PTN_SDC2	PTN - SDC2	PTN	Secreted Signaling	PMID: 28356350; PMID: 25620911	NL	-0.140086	31.7318	38.8862	2.51992e-20	-0.457087	20.6101	39.9061	5.8311e-22
694	Astrocyte_progenitors	Astrocyte_progenitors	PTN	SDC2	2.27446e-06	0	PTN_SDC2	PTN - SDC2	PTN	Secreted Signaling	PMID: 28356350; PMID: 25620911	NL	-3.33276	83.1845	89.3897	3.50741e-37	-0.457087	20.6101	39.9061	5.8311e-22
695	Mig_Layer_2-4_ExN	Astrocyte_progenitors	PTN	SDC2	6.78956e-08	0	PTN_SDC2	PTN - SDC2	PTN	Secreted Signaling	PMID: 28356350; PMID: 25620911	NL	-0.171772	32.4001	46.2046	2.40283e-29	-0.457087	20.6101	39.9061	5.8311e-22
696	IP	Astrocyte_progenitors	PTN	SDC2	7.84783e-08	0	PTN_SDC2	PTN - SDC2	PTN	Secreted Signaling	PMID: 28356350; PMID: 25620911	NL	-0.195073	38.4662	43.498	2.12785e-05	-0.457087	20.6101	39.9061	5.8311e-22
697	oRG	Astrocyte_progenitors	PTN	SDC2	8.68004e-07	0	PTN_SDC2	PTN - SDC2	PTN	Secreted Signaling	PMID: 28356350; PMID: 25620911	NL	-1.53215	87.5549	71.2642	2.13527e-24	-0.457087	20.6101	39.9061	5.8311e-22
698	vRG	Astrocyte_progenitors	PTN	SDC2	6.40029e-07	0	PTN_SDC2	PTN - SDC2	PTN	Secreted Signaling	PMID: 28356350; PMID: 25620911	NL	-0.958902	69.332	75.7261	0.00284976	-0.457087	20.6101	39.9061	5.8311e-22
699	Cycling_progenitors	Astrocyte_progenitors	PTN	SDC2	1.47083e-07	0	PTN_SDC2	PTN - SDC2	PTN	Secreted Signaling	PMID: 28356350; PMID: 25620911	NL	-0.267752	58.9003	48	2.1354e-10	-0.457087	20.6101	39.9061	5.8311e-22
700	Layer_4-6_ExN	Astrocyte_progenitors	PTN	SDC2	6.30214e-08	0	PTN_SDC2	PTN - SDC2	PTN	Secreted Signaling	PMID: 28356350; PMID: 25620911	NL	-0.104666	33.6968	44.2484	8.24442e-14	-0.457087	20.6101	39.9061	5.8311e-22
701	Interneuron_3	Astrocyte_progenitors	PTN	SDC2	2.43221e-08	0	PTN_SDC2	PTN - SDC2	PTN	Secreted Signaling	PMID: 28356350; PMID: 25620911	NL	-0.0667606	19.2547	25.4902	0.00663257	-0.457087	20.6101	39.9061	5.8311e-22
702	Layer_5-6_ExN	Astrocyte_progenitors	PTN	SDC2	5.84745e-08	0	PTN_SDC2	PTN - SDC2	PTN	Secreted Signaling	PMID: 28356350; PMID: 25620911	NL	-0.113441	30.7362	42.6476	1.50925e-17	-0.457087	20.6101	39.9061	5.8311e-22
703	Smooth_muscle_1	Astrocyte_progenitors	PTN	SDC2	9.03784e-07	0	PTN_SDC2	PTN - SDC2	PTN	Secreted Signaling	PMID: 28356350; PMID: 25620911	NL	-0.877426	71.4286	81.3953	0.0151054	-0.457087	20.6101	39.9061	5.8311e-22
704	Layer_4-5_ExN	Astrocyte_progenitors	PTN	SDC2	6.89759e-08	0	PTN_SDC2	PTN - SDC2	PTN	Secreted Signaling	PMID: 28356350; PMID: 25620911	NL	-0.198625	32.8958	48.6762	4.93885e-08	-0.457087	20.6101	39.9061	5.8311e-22
705	Mig_Layer_2-3_ExN	vRG	PTN	SDC2	1.37376e-08	0	PTN_SDC2	PTN - SDC2	PTN	Secreted Signaling	PMID: 28356350; PMID: 25620911	NL	-0.115145	28.2182	37.6415	1.15989e-72	-0.130331	19.6356	25	0.00681659
706	Layer_2-4_ExN	vRG	PTN	SDC2	1.39865e-08	0	PTN_SDC2	PTN - SDC2	PTN	Secreted Signaling	PMID: 28356350; PMID: 25620911	NL	-0.140086	31.7318	38.8862	2.51992e-20	-0.130331	19.6356	25	0.00681659
707	Astrocyte_progenitors	vRG	PTN	SDC2	4.88631e-07	0	PTN_SDC2	PTN - SDC2	PTN	Secreted Signaling	PMID: 28356350; PMID: 25620911	NL	-3.33276	83.1845	89.3897	3.50741e-37	-0.130331	19.6356	25	0.00681659
708	Mig_Layer_2-4_ExN	vRG	PTN	SDC2	1.45863e-08	0	PTN_SDC2	PTN - SDC2	PTN	Secreted Signaling	PMID: 28356350; PMID: 25620911	NL	-0.171772	32.4001	46.2046	2.40283e-29	-0.130331	19.6356	25	0.00681659
709	IP	vRG	PTN	SDC2	1.68598e-08	0	PTN_SDC2	PTN - SDC2	PTN	Secreted Signaling	PMID: 28356350; PMID: 25620911	NL	-0.195073	38.4662	43.498	2.12785e-05	-0.130331	19.6356	25	0.00681659
710	oRG	vRG	PTN	SDC2	1.86476e-07	0	PTN_SDC2	PTN - SDC2	PTN	Secreted Signaling	PMID: 28356350; PMID: 25620911	NL	-1.53215	87.5549	71.2642	2.13527e-24	-0.130331	19.6356	25	0.00681659
711	vRG	vRG	PTN	SDC2	1.375e-07	0	PTN_SDC2	PTN - SDC2	PTN	Secreted Signaling	PMID: 28356350; PMID: 25620911	NL	-0.958902	69.332	75.7261	0.00284976	-0.130331	19.6356	25	0.00681659
712	Cycling_progenitors	vRG	PTN	SDC2	3.15984e-08	0	PTN_SDC2	PTN - SDC2	PTN	Secreted Signaling	PMID: 28356350; PMID: 25620911	NL	-0.267752	58.9003	48	2.1354e-10	-0.130331	19.6356	25	0.00681659
713	Layer_4-6_ExN	vRG	PTN	SDC2	1.35391e-08	0	PTN_SDC2	PTN - SDC2	PTN	Secreted Signaling	PMID: 28356350; PMID: 25620911	NL	-0.104666	33.6968	44.2484	8.24442e-14	-0.130331	19.6356	25	0.00681659
714	Interneuron_3	vRG	PTN	SDC2	5.22521e-09	0	PTN_SDC2	PTN - SDC2	PTN	Secreted Signaling	PMID: 28356350; PMID: 25620911	NL	-0.0667606	19.2547	25.4902	0.00663257	-0.130331	19.6356	25	0.00681659
715	Layer_5-6_ExN	vRG	PTN	SDC2	1.25623e-08	0	PTN_SDC2	PTN - SDC2	PTN	Secreted Signaling	PMID: 28356350; PMID: 25620911	NL	-0.113441	30.7362	42.6476	1.50925e-17	-0.130331	19.6356	25	0.00681659
716	Smooth_muscle_1	vRG	PTN	SDC2	1.94163e-07	0	PTN_SDC2	PTN - SDC2	PTN	Secreted Signaling	PMID: 28356350; PMID: 25620911	NL	-0.877426	71.4286	81.3953	0.0151054	-0.130331	19.6356	25	0.00681659
717	Layer_4-5_ExN	vRG	PTN	SDC2	1.48183e-08	0	PTN_SDC2	PTN - SDC2	PTN	Secreted Signaling	PMID: 28356350; PMID: 25620911	NL	-0.198625	32.8958	48.6762	4.93885e-08	-0.130331	19.6356	25	0.00681659
718	Mig_Layer_2-3_ExN	Layer_2-4_ExN	PTN	SDC3	5.19999e-08	0	PTN_SDC3	PTN - SDC3	PTN	Secreted Signaling	PMID: 28356350; PMID: 25620911	NL	-0.115145	28.2182	37.6415	1.15989e-72	-0.159239	15.4875	26.5511	1.73003e-55
719	Layer_2-4_ExN	Layer_2-4_ExN	PTN	SDC3	5.29423e-08	0	PTN_SDC3	PTN - SDC3	PTN	Secreted Signaling	PMID: 28356350; PMID: 25620911	NL	-0.140086	31.7318	38.8862	2.51992e-20	-0.159239	15.4875	26.5511	1.73003e-55
720	Astrocyte_progenitors	Layer_2-4_ExN	PTN	SDC3	1.84958e-06	0	PTN_SDC3	PTN - SDC3	PTN	Secreted Signaling	PMID: 28356350; PMID: 25620911	NL	-3.33276	83.1845	89.3897	3.50741e-37	-0.159239	15.4875	26.5511	1.73003e-55
721	Mig_Layer_2-4_ExN	Layer_2-4_ExN	PTN	SDC3	5.52124e-08	0	PTN_SDC3	PTN - SDC3	PTN	Secreted Signaling	PMID: 28356350; PMID: 25620911	NL	-0.171772	32.4001	46.2046	2.40283e-29	-0.159239	15.4875	26.5511	1.73003e-55
722	IP	Layer_2-4_ExN	PTN	SDC3	6.38182e-08	0	PTN_SDC3	PTN - SDC3	PTN	Secreted Signaling	PMID: 28356350; PMID: 25620911	NL	-0.195073	38.4662	43.498	2.12785e-05	-0.159239	15.4875	26.5511	1.73003e-55
723	oRG	Layer_2-4_ExN	PTN	SDC3	7.05856e-07	0	PTN_SDC3	PTN - SDC3	PTN	Secreted Signaling	PMID: 28356350; PMID: 25620911	NL	-1.53215	87.5549	71.2642	2.13527e-24	-0.159239	15.4875	26.5511	1.73003e-55
724	vRG	Layer_2-4_ExN	PTN	SDC3	5.20469e-07	0	PTN_SDC3	PTN - SDC3	PTN	Secreted Signaling	PMID: 28356350; PMID: 25620911	NL	-0.958902	69.332	75.7261	0.00284976	-0.159239	15.4875	26.5511	1.73003e-55
725	Cycling_progenitors	Layer_2-4_ExN	PTN	SDC3	1.19607e-07	0	PTN_SDC3	PTN - SDC3	PTN	Secreted Signaling	PMID: 28356350; PMID: 25620911	NL	-0.267752	58.9003	48	2.1354e-10	-0.159239	15.4875	26.5511	1.73003e-55
726	Layer_4-6_ExN	Layer_2-4_ExN	PTN	SDC3	5.12487e-08	0	PTN_SDC3	PTN - SDC3	PTN	Secreted Signaling	PMID: 28356350; PMID: 25620911	NL	-0.104666	33.6968	44.2484	8.24442e-14	-0.159239	15.4875	26.5511	1.73003e-55
727	Interneuron_3	Layer_2-4_ExN	PTN	SDC3	1.97786e-08	0	PTN_SDC3	PTN - SDC3	PTN	Secreted Signaling	PMID: 28356350; PMID: 25620911	NL	-0.0667606	19.2547	25.4902	0.00663257	-0.159239	15.4875	26.5511	1.73003e-55
728	Layer_5-6_ExN	Layer_2-4_ExN	PTN	SDC3	4.75512e-08	0	PTN_SDC3	PTN - SDC3	PTN	Secreted Signaling	PMID: 28356350; PMID: 25620911	NL	-0.113441	30.7362	42.6476	1.50925e-17	-0.159239	15.4875	26.5511	1.73003e-55
729	Smooth_muscle_1	Layer_2-4_ExN	PTN	SDC3	7.34953e-07	0	PTN_SDC3	PTN - SDC3	PTN	Secreted Signaling	PMID: 28356350; PMID: 25620911	NL	-0.877426	71.4286	81.3953	0.0151054	-0.159239	15.4875	26.5511	1.73003e-55
730	Layer_4-5_ExN	Layer_2-4_ExN	PTN	SDC3	5.60909e-08	0	PTN_SDC3	PTN - SDC3	PTN	Secreted Signaling	PMID: 28356350; PMID: 25620911	NL	-0.198625	32.8958	48.6762	4.93885e-08	-0.159239	15.4875	26.5511	1.73003e-55
731	Mig_Layer_2-3_ExN	Smooth_muscle_2	PTN	SDC3	3.14446e-07	0	PTN_SDC3	PTN - SDC3	PTN	Secreted Signaling	PMID: 28356350; PMID: 25620911	NL	-0.115145	28.2182	37.6415	1.15989e-72	-1.77289	28.4722	60.7595	1.0844e-11
732	Layer_2-4_ExN	Smooth_muscle_2	PTN	SDC3	3.20145e-07	0	PTN_SDC3	PTN - SDC3	PTN	Secreted Signaling	PMID: 28356350; PMID: 25620911	NL	-0.140086	31.7318	38.8862	2.51992e-20	-1.77289	28.4722	60.7595	1.0844e-11
733	Astrocyte_progenitors	Smooth_muscle_2	PTN	SDC3	1.11844e-05	0	PTN_SDC3	PTN - SDC3	PTN	Secreted Signaling	PMID: 28356350; PMID: 25620911	NL	-3.33276	83.1845	89.3897	3.50741e-37	-1.77289	28.4722	60.7595	1.0844e-11
734	Mig_Layer_2-4_ExN	Smooth_muscle_2	PTN	SDC3	3.33872e-07	0	PTN_SDC3	PTN - SDC3	PTN	Secreted Signaling	PMID: 28356350; PMID: 25620911	NL	-0.171772	32.4001	46.2046	2.40283e-29	-1.77289	28.4722	60.7595	1.0844e-11
735	IP	Smooth_muscle_2	PTN	SDC3	3.85912e-07	0	PTN_SDC3	PTN - SDC3	PTN	Secreted Signaling	PMID: 28356350; PMID: 25620911	NL	-0.195073	38.4662	43.498	2.12785e-05	-1.77289	28.4722	60.7595	1.0844e-11
736	oRG	Smooth_muscle_2	PTN	SDC3	4.26834e-06	0	PTN_SDC3	PTN - SDC3	PTN	Secreted Signaling	PMID: 28356350; PMID: 25620911	NL	-1.53215	87.5549	71.2642	2.13527e-24	-1.77289	28.4722	60.7595	1.0844e-11
737	vRG	Smooth_muscle_2	PTN	SDC3	3.14729e-06	0	PTN_SDC3	PTN - SDC3	PTN	Secreted Signaling	PMID: 28356350; PMID: 25620911	NL	-0.958902	69.332	75.7261	0.00284976	-1.77289	28.4722	60.7595	1.0844e-11
738	Cycling_progenitors	Smooth_muscle_2	PTN	SDC3	7.23271e-07	0	PTN_SDC3	PTN - SDC3	PTN	Secreted Signaling	PMID: 28356350; PMID: 25620911	NL	-0.267752	58.9003	48	2.1354e-10	-1.77289	28.4722	60.7595	1.0844e-11
739	Layer_4-6_ExN	Smooth_muscle_2	PTN	SDC3	3.09904e-07	0	PTN_SDC3	PTN - SDC3	PTN	Secreted Signaling	PMID: 28356350; PMID: 25620911	NL	-0.104666	33.6968	44.2484	8.24442e-14	-1.77289	28.4722	60.7595	1.0844e-11
740	Interneuron_3	Smooth_muscle_2	PTN	SDC3	1.19602e-07	0	PTN_SDC3	PTN - SDC3	PTN	Secreted Signaling	PMID: 28356350; PMID: 25620911	NL	-0.0667606	19.2547	25.4902	0.00663257	-1.77289	28.4722	60.7595	1.0844e-11
741	Layer_5-6_ExN	Smooth_muscle_2	PTN	SDC3	2.87545e-07	0	PTN_SDC3	PTN - SDC3	PTN	Secreted Signaling	PMID: 28356350; PMID: 25620911	NL	-0.113441	30.7362	42.6476	1.50925e-17	-1.77289	28.4722	60.7595	1.0844e-11
742	Smooth_muscle_1	Smooth_muscle_2	PTN	SDC3	4.44428e-06	0	PTN_SDC3	PTN - SDC3	PTN	Secreted Signaling	PMID: 28356350; PMID: 25620911	NL	-0.877426	71.4286	81.3953	0.0151054	-1.77289	28.4722	60.7595	1.0844e-11
743	Layer_4-5_ExN	Smooth_muscle_2	PTN	SDC3	3.39184e-07	0	PTN_SDC3	PTN - SDC3	PTN	Secreted Signaling	PMID: 28356350; PMID: 25620911	NL	-0.198625	32.8958	48.6762	4.93885e-08	-1.77289	28.4722	60.7595	1.0844e-11
744	Mig_Layer_2-3_ExN	OPC_1	PTN	SDC3	4.78798e-08	0	PTN_SDC3	PTN - SDC3	PTN	Secreted Signaling	PMID: 28356350; PMID: 25620911	NL	-0.115145	28.2182	37.6415	1.15989e-72	NA	NA	NA	NA
745	Layer_2-4_ExN	OPC_1	PTN	SDC3	4.87475e-08	0	PTN_SDC3	PTN - SDC3	PTN	Secreted Signaling	PMID: 28356350; PMID: 25620911	NL	-0.140086	31.7318	38.8862	2.51992e-20	NA	NA	NA	NA
746	Astrocyte_progenitors	OPC_1	PTN	SDC3	1.70303e-06	0	PTN_SDC3	PTN - SDC3	PTN	Secreted Signaling	PMID: 28356350; PMID: 25620911	NL	-3.33276	83.1845	89.3897	3.50741e-37	NA	NA	NA	NA
747	Mig_Layer_2-4_ExN	OPC_1	PTN	SDC3	5.08377e-08	0	PTN_SDC3	PTN - SDC3	PTN	Secreted Signaling	PMID: 28356350; PMID: 25620911	NL	-0.171772	32.4001	46.2046	2.40283e-29	NA	NA	NA	NA
748	IP	OPC_1	PTN	SDC3	5.87616e-08	0	PTN_SDC3	PTN - SDC3	PTN	Secreted Signaling	PMID: 28356350; PMID: 25620911	NL	-0.195073	38.4662	43.498	2.12785e-05	NA	NA	NA	NA
749	oRG	OPC_1	PTN	SDC3	6.49929e-07	0	PTN_SDC3	PTN - SDC3	PTN	Secreted Signaling	PMID: 28356350; PMID: 25620911	NL	-1.53215	87.5549	71.2642	2.13527e-24	NA	NA	NA	NA
750	vRG	OPC_1	PTN	SDC3	4.7923e-07	0	PTN_SDC3	PTN - SDC3	PTN	Secreted Signaling	PMID: 28356350; PMID: 25620911	NL	-0.958902	69.332	75.7261	0.00284976	NA	NA	NA	NA
751	Cycling_progenitors	OPC_1	PTN	SDC3	1.1013e-07	0	PTN_SDC3	PTN - SDC3	PTN	Secreted Signaling	PMID: 28356350; PMID: 25620911	NL	-0.267752	58.9003	48	2.1354e-10	NA	NA	NA	NA
752	Layer_4-6_ExN	OPC_1	PTN	SDC3	4.71881e-08	0	PTN_SDC3	PTN - SDC3	PTN	Secreted Signaling	PMID: 28356350; PMID: 25620911	NL	-0.104666	33.6968	44.2484	8.24442e-14	NA	NA	NA	NA
753	Interneuron_3	OPC_1	PTN	SDC3	1.82115e-08	0	PTN_SDC3	PTN - SDC3	PTN	Secreted Signaling	PMID: 28356350; PMID: 25620911	NL	-0.0667606	19.2547	25.4902	0.00663257	NA	NA	NA	NA
754	Layer_5-6_ExN	OPC_1	PTN	SDC3	4.37836e-08	0	PTN_SDC3	PTN - SDC3	PTN	Secreted Signaling	PMID: 28356350; PMID: 25620911	NL	-0.113441	30.7362	42.6476	1.50925e-17	NA	NA	NA	NA
755	Smooth_muscle_1	OPC_1	PTN	SDC3	6.7672e-07	0	PTN_SDC3	PTN - SDC3	PTN	Secreted Signaling	PMID: 28356350; PMID: 25620911	NL	-0.877426	71.4286	81.3953	0.0151054	NA	NA	NA	NA
756	Layer_4-5_ExN	OPC_1	PTN	SDC3	5.16466e-08	0	PTN_SDC3	PTN - SDC3	PTN	Secreted Signaling	PMID: 28356350; PMID: 25620911	NL	-0.198625	32.8958	48.6762	4.93885e-08	NA	NA	NA	NA
757	Mig_Layer_2-3_ExN	Layer_2-4_ExN	PTN	NCL	5.11702e-08	0.02	PTN_NCL	PTN - NCL	PTN	Secreted Signaling	PMID: 28356350; PMID: 25620911	NL	-0.115145	28.2182	37.6415	1.15989e-72	-0.241347	20.1514	34.1964	1.80797e-71
758	Layer_2-4_ExN	Layer_2-4_ExN	PTN	NCL	5.20976e-08	0.01	PTN_NCL	PTN - NCL	PTN	Secreted Signaling	PMID: 28356350; PMID: 25620911	NL	-0.140086	31.7318	38.8862	2.51992e-20	-0.241347	20.1514	34.1964	1.80797e-71
759	Astrocyte_progenitors	Layer_2-4_ExN	PTN	NCL	1.82007e-06	0	PTN_NCL	PTN - NCL	PTN	Secreted Signaling	PMID: 28356350; PMID: 25620911	NL	-3.33276	83.1845	89.3897	3.50741e-37	-0.241347	20.1514	34.1964	1.80797e-71
760	Mig_Layer_2-4_ExN	Layer_2-4_ExN	PTN	NCL	5.43314e-08	0	PTN_NCL	PTN - NCL	PTN	Secreted Signaling	PMID: 28356350; PMID: 25620911	NL	-0.171772	32.4001	46.2046	2.40283e-29	-0.241347	20.1514	34.1964	1.80797e-71
761	IP	Layer_2-4_ExN	PTN	NCL	6.27999e-08	0	PTN_NCL	PTN - NCL	PTN	Secreted Signaling	PMID: 28356350; PMID: 25620911	NL	-0.195073	38.4662	43.498	2.12785e-05	-0.241347	20.1514	34.1964	1.80797e-71
762	oRG	Layer_2-4_ExN	PTN	NCL	6.94594e-07	0	PTN_NCL	PTN - NCL	PTN	Secreted Signaling	PMID: 28356350; PMID: 25620911	NL	-1.53215	87.5549	71.2642	2.13527e-24	-0.241347	20.1514	34.1964	1.80797e-71
763	vRG	Layer_2-4_ExN	PTN	NCL	5.12164e-07	0	PTN_NCL	PTN - NCL	PTN	Secreted Signaling	PMID: 28356350; PMID: 25620911	NL	-0.958902	69.332	75.7261	0.00284976	-0.241347	20.1514	34.1964	1.80797e-71
764	Cycling_progenitors	Layer_2-4_ExN	PTN	NCL	1.17699e-07	0	PTN_NCL	PTN - NCL	PTN	Secreted Signaling	PMID: 28356350; PMID: 25620911	NL	-0.267752	58.9003	48	2.1354e-10	-0.241347	20.1514	34.1964	1.80797e-71
765	Layer_4-6_ExN	Layer_2-4_ExN	PTN	NCL	5.0431e-08	0.03	PTN_NCL	PTN - NCL	PTN	Secreted Signaling	PMID: 28356350; PMID: 25620911	NL	-0.104666	33.6968	44.2484	8.24442e-14	-0.241347	20.1514	34.1964	1.80797e-71
766	Smooth_muscle_1	Layer_2-4_ExN	PTN	NCL	7.23226e-07	0	PTN_NCL	PTN - NCL	PTN	Secreted Signaling	PMID: 28356350; PMID: 25620911	NL	-0.877426	71.4286	81.3953	0.0151054	-0.241347	20.1514	34.1964	1.80797e-71
767	Layer_4-5_ExN	Layer_2-4_ExN	PTN	NCL	5.51959e-08	0.01	PTN_NCL	PTN - NCL	PTN	Secreted Signaling	PMID: 28356350; PMID: 25620911	NL	-0.198625	32.8958	48.6762	4.93885e-08	-0.241347	20.1514	34.1964	1.80797e-71
768	Astrocyte_progenitors	Mig_Layer_2-4_ExN	PTN	NCL	1.53169e-06	0	PTN_NCL	PTN - NCL	PTN	Secreted Signaling	PMID: 28356350; PMID: 25620911	NL	-3.33276	83.1845	89.3897	3.50741e-37	-0.127685	18.9288	27.8878	1.01674e-20
769	IP	Mig_Layer_2-4_ExN	PTN	NCL	5.28495e-08	0.01	PTN_NCL	PTN - NCL	PTN	Secreted Signaling	PMID: 28356350; PMID: 25620911	NL	-0.195073	38.4662	43.498	2.12785e-05	-0.127685	18.9288	27.8878	1.01674e-20
770	oRG	Mig_Layer_2-4_ExN	PTN	NCL	5.84538e-07	0	PTN_NCL	PTN - NCL	PTN	Secreted Signaling	PMID: 28356350; PMID: 25620911	NL	-1.53215	87.5549	71.2642	2.13527e-24	-0.127685	18.9288	27.8878	1.01674e-20
771	vRG	Mig_Layer_2-4_ExN	PTN	NCL	4.31014e-07	0	PTN_NCL	PTN - NCL	PTN	Secreted Signaling	PMID: 28356350; PMID: 25620911	NL	-0.958902	69.332	75.7261	0.00284976	-0.127685	18.9288	27.8878	1.01674e-20
772	Cycling_progenitors	Mig_Layer_2-4_ExN	PTN	NCL	9.90499e-08	0	PTN_NCL	PTN - NCL	PTN	Secreted Signaling	PMID: 28356350; PMID: 25620911	NL	-0.267752	58.9003	48	2.1354e-10	-0.127685	18.9288	27.8878	1.01674e-20
773	Smooth_muscle_1	Mig_Layer_2-4_ExN	PTN	NCL	6.08634e-07	0	PTN_NCL	PTN - NCL	PTN	Secreted Signaling	PMID: 28356350; PMID: 25620911	NL	-0.877426	71.4286	81.3953	0.0151054	-0.127685	18.9288	27.8878	1.01674e-20
774	Mig_Layer_2-3_ExN	IP	PTN	NCL	4.98308e-08	0.01	PTN_NCL	PTN - NCL	PTN	Secreted Signaling	PMID: 28356350; PMID: 25620911	NL	-0.115145	28.2182	37.6415	1.15989e-72	-0.0958635	19.8535	26.2127	1.16394e-17
775	Layer_2-4_ExN	IP	PTN	NCL	5.07339e-08	0	PTN_NCL	PTN - NCL	PTN	Secreted Signaling	PMID: 28356350; PMID: 25620911	NL	-0.140086	31.7318	38.8862	2.51992e-20	-0.0958635	19.8535	26.2127	1.16394e-17
776	Astrocyte_progenitors	IP	PTN	NCL	1.77243e-06	0	PTN_NCL	PTN - NCL	PTN	Secreted Signaling	PMID: 28356350; PMID: 25620911	NL	-3.33276	83.1845	89.3897	3.50741e-37	-0.0958635	19.8535	26.2127	1.16394e-17
777	Mig_Layer_2-4_ExN	IP	PTN	NCL	5.29092e-08	0	PTN_NCL	PTN - NCL	PTN	Secreted Signaling	PMID: 28356350; PMID: 25620911	NL	-0.171772	32.4001	46.2046	2.40283e-29	-0.0958635	19.8535	26.2127	1.16394e-17
778	IP	IP	PTN	NCL	6.11561e-08	0	PTN_NCL	PTN - NCL	PTN	Secreted Signaling	PMID: 28356350; PMID: 25620911	NL	-0.195073	38.4662	43.498	2.12785e-05	-0.0958635	19.8535	26.2127	1.16394e-17
779	oRG	IP	PTN	NCL	6.76412e-07	0	PTN_NCL	PTN - NCL	PTN	Secreted Signaling	PMID: 28356350; PMID: 25620911	NL	-1.53215	87.5549	71.2642	2.13527e-24	-0.0958635	19.8535	26.2127	1.16394e-17
780	vRG	IP	PTN	NCL	4.98758e-07	0	PTN_NCL	PTN - NCL	PTN	Secreted Signaling	PMID: 28356350; PMID: 25620911	NL	-0.958902	69.332	75.7261	0.00284976	-0.0958635	19.8535	26.2127	1.16394e-17
781	Cycling_progenitors	IP	PTN	NCL	1.14618e-07	0	PTN_NCL	PTN - NCL	PTN	Secreted Signaling	PMID: 28356350; PMID: 25620911	NL	-0.267752	58.9003	48	2.1354e-10	-0.0958635	19.8535	26.2127	1.16394e-17
782	Layer_4-6_ExN	IP	PTN	NCL	4.91109e-08	0.02	PTN_NCL	PTN - NCL	PTN	Secreted Signaling	PMID: 28356350; PMID: 25620911	NL	-0.104666	33.6968	44.2484	8.24442e-14	-0.0958635	19.8535	26.2127	1.16394e-17
783	Smooth_muscle_1	IP	PTN	NCL	7.04295e-07	0	PTN_NCL	PTN - NCL	PTN	Secreted Signaling	PMID: 28356350; PMID: 25620911	NL	-0.877426	71.4286	81.3953	0.0151054	-0.0958635	19.8535	26.2127	1.16394e-17
784	Layer_4-5_ExN	IP	PTN	NCL	5.37511e-08	0.01	PTN_NCL	PTN - NCL	PTN	Secreted Signaling	PMID: 28356350; PMID: 25620911	NL	-0.198625	32.8958	48.6762	4.93885e-08	-0.0958635	19.8535	26.2127	1.16394e-17
785	Mig_Layer_2-3_ExN	oRG	PTN	NCL	5.12904e-08	0	PTN_NCL	PTN - NCL	PTN	Secreted Signaling	PMID: 28356350; PMID: 25620911	NL	-0.115145	28.2182	37.6415	1.15989e-72	-0.126246	20.7199	29.6759	1.1835e-25
786	Layer_2-4_ExN	oRG	PTN	NCL	5.222e-08	0	PTN_NCL	PTN - NCL	PTN	Secreted Signaling	PMID: 28356350; PMID: 25620911	NL	-0.140086	31.7318	38.8862	2.51992e-20	-0.126246	20.7199	29.6759	1.1835e-25
787	Astrocyte_progenitors	oRG	PTN	NCL	1.82435e-06	0	PTN_NCL	PTN - NCL	PTN	Secreted Signaling	PMID: 28356350; PMID: 25620911	NL	-3.33276	83.1845	89.3897	3.50741e-37	-0.126246	20.7199	29.6759	1.1835e-25
788	Mig_Layer_2-4_ExN	oRG	PTN	NCL	5.44591e-08	0	PTN_NCL	PTN - NCL	PTN	Secreted Signaling	PMID: 28356350; PMID: 25620911	NL	-0.171772	32.4001	46.2046	2.40283e-29	-0.126246	20.7199	29.6759	1.1835e-25
789	IP	oRG	PTN	NCL	6.29475e-08	0	PTN_NCL	PTN - NCL	PTN	Secreted Signaling	PMID: 28356350; PMID: 25620911	NL	-0.195073	38.4662	43.498	2.12785e-05	-0.126246	20.7199	29.6759	1.1835e-25
790	oRG	oRG	PTN	NCL	6.96226e-07	0	PTN_NCL	PTN - NCL	PTN	Secreted Signaling	PMID: 28356350; PMID: 25620911	NL	-1.53215	87.5549	71.2642	2.13527e-24	-0.126246	20.7199	29.6759	1.1835e-25
791	vRG	oRG	PTN	NCL	5.13368e-07	0	PTN_NCL	PTN - NCL	PTN	Secreted Signaling	PMID: 28356350; PMID: 25620911	NL	-0.958902	69.332	75.7261	0.00284976	-0.126246	20.7199	29.6759	1.1835e-25
792	Cycling_progenitors	oRG	PTN	NCL	1.17975e-07	0	PTN_NCL	PTN - NCL	PTN	Secreted Signaling	PMID: 28356350; PMID: 25620911	NL	-0.267752	58.9003	48	2.1354e-10	-0.126246	20.7199	29.6759	1.1835e-25
793	Layer_4-6_ExN	oRG	PTN	NCL	5.05495e-08	0.01	PTN_NCL	PTN - NCL	PTN	Secreted Signaling	PMID: 28356350; PMID: 25620911	NL	-0.104666	33.6968	44.2484	8.24442e-14	-0.126246	20.7199	29.6759	1.1835e-25
794	Smooth_muscle_1	oRG	PTN	NCL	7.24926e-07	0	PTN_NCL	PTN - NCL	PTN	Secreted Signaling	PMID: 28356350; PMID: 25620911	NL	-0.877426	71.4286	81.3953	0.0151054	-0.126246	20.7199	29.6759	1.1835e-25
795	Layer_4-5_ExN	oRG	PTN	NCL	5.53256e-08	0.01	PTN_NCL	PTN - NCL	PTN	Secreted Signaling	PMID: 28356350; PMID: 25620911	NL	-0.198625	32.8958	48.6762	4.93885e-08	-0.126246	20.7199	29.6759	1.1835e-25
796	Astrocyte_progenitors	Cycling_progenitors	PTN	NCL	1.67541e-06	0	PTN_NCL	PTN - NCL	PTN	Secreted Signaling	PMID: 28356350; PMID: 25620911	NL	-3.33276	83.1845	89.3897	3.50741e-37	-0.135262	20.4101	28.2778	3.77408e-07
797	IP	Cycling_progenitors	PTN	NCL	5.78087e-08	0	PTN_NCL	PTN - NCL	PTN	Secreted Signaling	PMID: 28356350; PMID: 25620911	NL	-0.195073	38.4662	43.498	2.12785e-05	-0.135262	20.4101	28.2778	3.77408e-07
798	oRG	Cycling_progenitors	PTN	NCL	6.39389e-07	0	PTN_NCL	PTN - NCL	PTN	Secreted Signaling	PMID: 28356350; PMID: 25620911	NL	-1.53215	87.5549	71.2642	2.13527e-24	-0.135262	20.4101	28.2778	3.77408e-07
799	vRG	Cycling_progenitors	PTN	NCL	4.71459e-07	0	PTN_NCL	PTN - NCL	PTN	Secreted Signaling	PMID: 28356350; PMID: 25620911	NL	-0.958902	69.332	75.7261	0.00284976	-0.135262	20.4101	28.2778	3.77408e-07
800	Cycling_progenitors	Cycling_progenitors	PTN	NCL	1.08344e-07	0	PTN_NCL	PTN - NCL	PTN	Secreted Signaling	PMID: 28356350; PMID: 25620911	NL	-0.267752	58.9003	48	2.1354e-10	-0.135262	20.4101	28.2778	3.77408e-07
801	Smooth_muscle_1	Cycling_progenitors	PTN	NCL	6.65746e-07	0	PTN_NCL	PTN - NCL	PTN	Secreted Signaling	PMID: 28356350; PMID: 25620911	NL	-0.877426	71.4286	81.3953	0.0151054	-0.135262	20.4101	28.2778	3.77408e-07
802	Astrocyte_progenitors	Layer_4-6_ExN	PTN	NCL	1.39154e-06	0	PTN_NCL	PTN - NCL	PTN	Secreted Signaling	PMID: 28356350; PMID: 25620911	NL	-3.33276	83.1845	89.3897	3.50741e-37	-0.112983	21.9415	30.0992	3.53333e-15
803	oRG	Layer_4-6_ExN	PTN	NCL	5.31053e-07	0	PTN_NCL	PTN - NCL	PTN	Secreted Signaling	PMID: 28356350; PMID: 25620911	NL	-1.53215	87.5549	71.2642	2.13527e-24	-0.112983	21.9415	30.0992	3.53333e-15
804	vRG	Layer_4-6_ExN	PTN	NCL	3.91576e-07	0	PTN_NCL	PTN - NCL	PTN	Secreted Signaling	PMID: 28356350; PMID: 25620911	NL	-0.958902	69.332	75.7261	0.00284976	-0.112983	21.9415	30.0992	3.53333e-15
805	Cycling_progenitors	Layer_4-6_ExN	PTN	NCL	8.99869e-08	0	PTN_NCL	PTN - NCL	PTN	Secreted Signaling	PMID: 28356350; PMID: 25620911	NL	-0.267752	58.9003	48	2.1354e-10	-0.112983	21.9415	30.0992	3.53333e-15
806	Smooth_muscle_1	Layer_4-6_ExN	PTN	NCL	5.52944e-07	0	PTN_NCL	PTN - NCL	PTN	Secreted Signaling	PMID: 28356350; PMID: 25620911	NL	-0.877426	71.4286	81.3953	0.0151054	-0.112983	21.9415	30.0992	3.53333e-15
807	Astrocyte_progenitors	Microglia_1	PTN	NCL	1.8331e-06	0	PTN_NCL	PTN - NCL	PTN	Secreted Signaling	PMID: 28356350; PMID: 25620911	NL	-3.33276	83.1845	89.3897	3.50741e-37	NA	NA	NA	NA
808	IP	Microglia_1	PTN	NCL	6.32497e-08	0	PTN_NCL	PTN - NCL	PTN	Secreted Signaling	PMID: 28356350; PMID: 25620911	NL	-0.195073	38.4662	43.498	2.12785e-05	NA	NA	NA	NA
809	oRG	Microglia_1	PTN	NCL	6.99569e-07	0	PTN_NCL	PTN - NCL	PTN	Secreted Signaling	PMID: 28356350; PMID: 25620911	NL	-1.53215	87.5549	71.2642	2.13527e-24	NA	NA	NA	NA
810	vRG	Microglia_1	PTN	NCL	5.15832e-07	0	PTN_NCL	PTN - NCL	PTN	Secreted Signaling	PMID: 28356350; PMID: 25620911	NL	-0.958902	69.332	75.7261	0.00284976	NA	NA	NA	NA
811	Cycling_progenitors	Microglia_1	PTN	NCL	1.18542e-07	0	PTN_NCL	PTN - NCL	PTN	Secreted Signaling	PMID: 28356350; PMID: 25620911	NL	-0.267752	58.9003	48	2.1354e-10	NA	NA	NA	NA
812	Smooth_muscle_1	Microglia_1	PTN	NCL	7.28406e-07	0	PTN_NCL	PTN - NCL	PTN	Secreted Signaling	PMID: 28356350; PMID: 25620911	NL	-0.877426	71.4286	81.3953	0.0151054	NA	NA	NA	NA
813	Astrocyte_progenitors	Layer_5-6_ExN	PTN	NCL	1.30847e-06	0	PTN_NCL	PTN - NCL	PTN	Secreted Signaling	PMID: 28356350; PMID: 25620911	NL	-3.33276	83.1845	89.3897	3.50741e-37	-0.105809	22.8221	30.2897	2.19964e-11
814	oRG	Layer_5-6_ExN	PTN	NCL	4.99351e-07	0	PTN_NCL	PTN - NCL	PTN	Secreted Signaling	PMID: 28356350; PMID: 25620911	NL	-1.53215	87.5549	71.2642	2.13527e-24	-0.105809	22.8221	30.2897	2.19964e-11
815	vRG	Layer_5-6_ExN	PTN	NCL	3.682e-07	0	PTN_NCL	PTN - NCL	PTN	Secreted Signaling	PMID: 28356350; PMID: 25620911	NL	-0.958902	69.332	75.7261	0.00284976	-0.105809	22.8221	30.2897	2.19964e-11
816	Cycling_progenitors	Layer_5-6_ExN	PTN	NCL	8.46149e-08	0	PTN_NCL	PTN - NCL	PTN	Secreted Signaling	PMID: 28356350; PMID: 25620911	NL	-0.267752	58.9003	48	2.1354e-10	-0.105809	22.8221	30.2897	2.19964e-11
817	Smooth_muscle_1	Layer_5-6_ExN	PTN	NCL	5.19935e-07	0	PTN_NCL	PTN - NCL	PTN	Secreted Signaling	PMID: 28356350; PMID: 25620911	NL	-0.877426	71.4286	81.3953	0.0151054	-0.105809	22.8221	30.2897	2.19964e-11
818	Mig_Layer_2-3_ExN	Smooth_muscle_2	PTN	NCL	5.41436e-07	0	PTN_NCL	PTN - NCL	PTN	Secreted Signaling	PMID: 28356350; PMID: 25620911	NL	-0.115145	28.2182	37.6415	1.15989e-72	-1.8949	46.5278	70.2532	5.45157e-08
819	Layer_2-4_ExN	Smooth_muscle_2	PTN	NCL	5.51249e-07	0	PTN_NCL	PTN - NCL	PTN	Secreted Signaling	PMID: 28356350; PMID: 25620911	NL	-0.140086	31.7318	38.8862	2.51992e-20	-1.8949	46.5278	70.2532	5.45157e-08
820	Astrocyte_progenitors	Smooth_muscle_2	PTN	NCL	1.9258e-05	0	PTN_NCL	PTN - NCL	PTN	Secreted Signaling	PMID: 28356350; PMID: 25620911	NL	-3.33276	83.1845	89.3897	3.50741e-37	-1.8949	46.5278	70.2532	5.45157e-08
821	Mig_Layer_2-4_ExN	Smooth_muscle_2	PTN	NCL	5.74885e-07	0	PTN_NCL	PTN - NCL	PTN	Secreted Signaling	PMID: 28356350; PMID: 25620911	NL	-0.171772	32.4001	46.2046	2.40283e-29	-1.8949	46.5278	70.2532	5.45157e-08
822	IP	Smooth_muscle_2	PTN	NCL	6.6449e-07	0	PTN_NCL	PTN - NCL	PTN	Secreted Signaling	PMID: 28356350; PMID: 25620911	NL	-0.195073	38.4662	43.498	2.12785e-05	-1.8949	46.5278	70.2532	5.45157e-08
823	oRG	Smooth_muscle_2	PTN	NCL	7.3495e-06	0	PTN_NCL	PTN - NCL	PTN	Secreted Signaling	PMID: 28356350; PMID: 25620911	NL	-1.53215	87.5549	71.2642	2.13527e-24	-1.8949	46.5278	70.2532	5.45157e-08
824	vRG	Smooth_muscle_2	PTN	NCL	5.41922e-06	0	PTN_NCL	PTN - NCL	PTN	Secreted Signaling	PMID: 28356350; PMID: 25620911	NL	-0.958902	69.332	75.7261	0.00284976	-1.8949	46.5278	70.2532	5.45157e-08
825	Cycling_progenitors	Smooth_muscle_2	PTN	NCL	1.24538e-06	0	PTN_NCL	PTN - NCL	PTN	Secreted Signaling	PMID: 28356350; PMID: 25620911	NL	-0.267752	58.9003	48	2.1354e-10	-1.8949	46.5278	70.2532	5.45157e-08
826	Layer_4-6_ExN	Smooth_muscle_2	PTN	NCL	5.33614e-07	0	PTN_NCL	PTN - NCL	PTN	Secreted Signaling	PMID: 28356350; PMID: 25620911	NL	-0.104666	33.6968	44.2484	8.24442e-14	-1.8949	46.5278	70.2532	5.45157e-08
827	Interneuron_3	Smooth_muscle_2	PTN	NCL	2.0594e-07	0	PTN_NCL	PTN - NCL	PTN	Secreted Signaling	PMID: 28356350; PMID: 25620911	NL	-0.0667606	19.2547	25.4902	0.00663257	-1.8949	46.5278	70.2532	5.45157e-08
828	Layer_5-6_ExN	Smooth_muscle_2	PTN	NCL	4.95115e-07	0	PTN_NCL	PTN - NCL	PTN	Secreted Signaling	PMID: 28356350; PMID: 25620911	NL	-0.113441	30.7362	42.6476	1.50925e-17	-1.8949	46.5278	70.2532	5.45157e-08
829	Smooth_muscle_1	Smooth_muscle_2	PTN	NCL	7.65246e-06	0	PTN_NCL	PTN - NCL	PTN	Secreted Signaling	PMID: 28356350; PMID: 25620911	NL	-0.877426	71.4286	81.3953	0.0151054	-1.8949	46.5278	70.2532	5.45157e-08
830	Layer_4-5_ExN	Smooth_muscle_2	PTN	NCL	5.84032e-07	0	PTN_NCL	PTN - NCL	PTN	Secreted Signaling	PMID: 28356350; PMID: 25620911	NL	-0.198625	32.8958	48.6762	4.93885e-08	-1.8949	46.5278	70.2532	5.45157e-08
831	Astrocyte_progenitors	OL	PTN	NCL	1.57736e-06	0	PTN_NCL	PTN - NCL	PTN	Secreted Signaling	PMID: 28356350; PMID: 25620911	NL	-3.33276	83.1845	89.3897	3.50741e-37	NA	NA	NA	NA
832	oRG	OL	PTN	NCL	6.0197e-07	0	PTN_NCL	PTN - NCL	PTN	Secreted Signaling	PMID: 28356350; PMID: 25620911	NL	-1.53215	87.5549	71.2642	2.13527e-24	NA	NA	NA	NA
833	vRG	OL	PTN	NCL	4.43867e-07	0	PTN_NCL	PTN - NCL	PTN	Secreted Signaling	PMID: 28356350; PMID: 25620911	NL	-0.958902	69.332	75.7261	0.00284976	NA	NA	NA	NA
834	Cycling_progenitors	OL	PTN	NCL	1.02004e-07	0	PTN_NCL	PTN - NCL	PTN	Secreted Signaling	PMID: 28356350; PMID: 25620911	NL	-0.267752	58.9003	48	2.1354e-10	NA	NA	NA	NA
835	Smooth_muscle_1	OL	PTN	NCL	6.26784e-07	0	PTN_NCL	PTN - NCL	PTN	Secreted Signaling	PMID: 28356350; PMID: 25620911	NL	-0.877426	71.4286	81.3953	0.0151054	NA	NA	NA	NA
836	Astrocyte_progenitors	Interneuron_4	PTN	NCL	1.649e-06	0	PTN_NCL	PTN - NCL	PTN	Secreted Signaling	PMID: 28356350; PMID: 25620911	NL	-3.33276	83.1845	89.3897	3.50741e-37	-0.136253	13.4454	26.0274	0.0410975
837	oRG	Interneuron_4	PTN	NCL	6.29308e-07	0	PTN_NCL	PTN - NCL	PTN	Secreted Signaling	PMID: 28356350; PMID: 25620911	NL	-1.53215	87.5549	71.2642	2.13527e-24	-0.136253	13.4454	26.0274	0.0410975
838	vRG	Interneuron_4	PTN	NCL	4.64025e-07	0	PTN_NCL	PTN - NCL	PTN	Secreted Signaling	PMID: 28356350; PMID: 25620911	NL	-0.958902	69.332	75.7261	0.00284976	-0.136253	13.4454	26.0274	0.0410975
839	Cycling_progenitors	Interneuron_4	PTN	NCL	1.06636e-07	0	PTN_NCL	PTN - NCL	PTN	Secreted Signaling	PMID: 28356350; PMID: 25620911	NL	-0.267752	58.9003	48	2.1354e-10	-0.136253	13.4454	26.0274	0.0410975
840	Smooth_muscle_1	Interneuron_4	PTN	NCL	6.55249e-07	0	PTN_NCL	PTN - NCL	PTN	Secreted Signaling	PMID: 28356350; PMID: 25620911	NL	-0.877426	71.4286	81.3953	0.0151054	-0.136253	13.4454	26.0274	0.0410975
841	Mig_Layer_2-3_ExN	IP_IN	PTN	NCL	5.66762e-08	0	PTN_NCL	PTN - NCL	PTN	Secreted Signaling	PMID: 28356350; PMID: 25620911	NL	-0.115145	28.2182	37.6415	1.15989e-72	-0.199004	10.3659	26.4264	6.46011e-05
842	Layer_2-4_ExN	IP_IN	PTN	NCL	5.77034e-08	0	PTN_NCL	PTN - NCL	PTN	Secreted Signaling	PMID: 28356350; PMID: 25620911	NL	-0.140086	31.7318	38.8862	2.51992e-20	-0.199004	10.3659	26.4264	6.46011e-05
843	Astrocyte_progenitors	IP_IN	PTN	NCL	2.01591e-06	0	PTN_NCL	PTN - NCL	PTN	Secreted Signaling	PMID: 28356350; PMID: 25620911	NL	-3.33276	83.1845	89.3897	3.50741e-37	-0.199004	10.3659	26.4264	6.46011e-05
844	Mig_Layer_2-4_ExN	IP_IN	PTN	NCL	6.01776e-08	0	PTN_NCL	PTN - NCL	PTN	Secreted Signaling	PMID: 28356350; PMID: 25620911	NL	-0.171772	32.4001	46.2046	2.40283e-29	-0.199004	10.3659	26.4264	6.46011e-05
845	IP	IP_IN	PTN	NCL	6.95573e-08	0	PTN_NCL	PTN - NCL	PTN	Secreted Signaling	PMID: 28356350; PMID: 25620911	NL	-0.195073	38.4662	43.498	2.12785e-05	-0.199004	10.3659	26.4264	6.46011e-05
846	oRG	IP_IN	PTN	NCL	7.69333e-07	0	PTN_NCL	PTN - NCL	PTN	Secreted Signaling	PMID: 28356350; PMID: 25620911	NL	-1.53215	87.5549	71.2642	2.13527e-24	-0.199004	10.3659	26.4264	6.46011e-05
847	vRG	IP_IN	PTN	NCL	5.67274e-07	0	PTN_NCL	PTN - NCL	PTN	Secreted Signaling	PMID: 28356350; PMID: 25620911	NL	-0.958902	69.332	75.7261	0.00284976	-0.199004	10.3659	26.4264	6.46011e-05
848	Cycling_progenitors	IP_IN	PTN	NCL	1.30363e-07	0	PTN_NCL	PTN - NCL	PTN	Secreted Signaling	PMID: 28356350; PMID: 25620911	NL	-0.267752	58.9003	48	2.1354e-10	-0.199004	10.3659	26.4264	6.46011e-05
849	Layer_4-6_ExN	IP_IN	PTN	NCL	5.58574e-08	0.01	PTN_NCL	PTN - NCL	PTN	Secreted Signaling	PMID: 28356350; PMID: 25620911	NL	-0.104666	33.6968	44.2484	8.24442e-14	-0.199004	10.3659	26.4264	6.46011e-05
850	Smooth_muscle_1	IP_IN	PTN	NCL	8.01047e-07	0	PTN_NCL	PTN - NCL	PTN	Secreted Signaling	PMID: 28356350; PMID: 25620911	NL	-0.877426	71.4286	81.3953	0.0151054	-0.199004	10.3659	26.4264	6.46011e-05
851	Layer_4-5_ExN	IP_IN	PTN	NCL	6.11351e-08	0	PTN_NCL	PTN - NCL	PTN	Secreted Signaling	PMID: 28356350; PMID: 25620911	NL	-0.198625	32.8958	48.6762	4.93885e-08	-0.199004	10.3659	26.4264	6.46011e-05
852	Astrocyte_progenitors	Smooth_muscle_1	PTN	NCL	1.87618e-06	0	PTN_NCL	PTN - NCL	PTN	Secreted Signaling	PMID: 28356350; PMID: 25620911	NL	-3.33276	83.1845	89.3897	3.50741e-37	NA	NA	NA	NA
853	IP	Smooth_muscle_1	PTN	NCL	6.4736e-08	0.03	PTN_NCL	PTN - NCL	PTN	Secreted Signaling	PMID: 28356350; PMID: 25620911	NL	-0.195073	38.4662	43.498	2.12785e-05	NA	NA	NA	NA
854	oRG	Smooth_muscle_1	PTN	NCL	7.16009e-07	0	PTN_NCL	PTN - NCL	PTN	Secreted Signaling	PMID: 28356350; PMID: 25620911	NL	-1.53215	87.5549	71.2642	2.13527e-24	NA	NA	NA	NA
855	vRG	Smooth_muscle_1	PTN	NCL	5.27954e-07	0	PTN_NCL	PTN - NCL	PTN	Secreted Signaling	PMID: 28356350; PMID: 25620911	NL	-0.958902	69.332	75.7261	0.00284976	NA	NA	NA	NA
856	Cycling_progenitors	Smooth_muscle_1	PTN	NCL	1.21328e-07	0	PTN_NCL	PTN - NCL	PTN	Secreted Signaling	PMID: 28356350; PMID: 25620911	NL	-0.267752	58.9003	48	2.1354e-10	NA	NA	NA	NA
857	Smooth_muscle_1	Smooth_muscle_1	PTN	NCL	7.45524e-07	0	PTN_NCL	PTN - NCL	PTN	Secreted Signaling	PMID: 28356350; PMID: 25620911	NL	-0.877426	71.4286	81.3953	0.0151054	NA	NA	NA	NA
858	Astrocyte_progenitors	Layer_4-5_ExN	PTN	NCL	1.37597e-06	0	PTN_NCL	PTN - NCL	PTN	Secreted Signaling	PMID: 28356350; PMID: 25620911	NL	-3.33276	83.1845	89.3897	3.50741e-37	-0.121908	21.493	32.1792	8.30308e-06
859	oRG	Layer_4-5_ExN	PTN	NCL	5.25112e-07	0	PTN_NCL	PTN - NCL	PTN	Secreted Signaling	PMID: 28356350; PMID: 25620911	NL	-1.53215	87.5549	71.2642	2.13527e-24	-0.121908	21.493	32.1792	8.30308e-06
860	vRG	Layer_4-5_ExN	PTN	NCL	3.87195e-07	0	PTN_NCL	PTN - NCL	PTN	Secreted Signaling	PMID: 28356350; PMID: 25620911	NL	-0.958902	69.332	75.7261	0.00284976	-0.121908	21.493	32.1792	8.30308e-06
861	Cycling_progenitors	Layer_4-5_ExN	PTN	NCL	8.89801e-08	0	PTN_NCL	PTN - NCL	PTN	Secreted Signaling	PMID: 28356350; PMID: 25620911	NL	-0.267752	58.9003	48	2.1354e-10	-0.121908	21.493	32.1792	8.30308e-06
862	Smooth_muscle_1	Layer_4-5_ExN	PTN	NCL	5.46758e-07	0	PTN_NCL	PTN - NCL	PTN	Secreted Signaling	PMID: 28356350; PMID: 25620911	NL	-0.877426	71.4286	81.3953	0.0151054	-0.121908	21.493	32.1792	8.30308e-06
863	Mig_Layer_2-3_ExN	Interneuron_S1	PTN	ALK	1.34075e-07	0	PTN_ALK	PTN - ALK	PTN	Secreted Signaling	PMID: 28356350; PMID: 25620911	NL	-0.115145	28.2182	37.6415	1.15989e-72	NA	NA	NA	NA
864	Layer_2-4_ExN	Interneuron_S1	PTN	ALK	1.36505e-07	0	PTN_ALK	PTN - ALK	PTN	Secreted Signaling	PMID: 28356350; PMID: 25620911	NL	-0.140086	31.7318	38.8862	2.51992e-20	NA	NA	NA	NA
865	Astrocyte_progenitors	Interneuron_S1	PTN	ALK	4.76888e-06	0	PTN_ALK	PTN - ALK	PTN	Secreted Signaling	PMID: 28356350; PMID: 25620911	NL	-3.33276	83.1845	89.3897	3.50741e-37	NA	NA	NA	NA
866	Mig_Layer_2-4_ExN	Interneuron_S1	PTN	ALK	1.42358e-07	0	PTN_ALK	PTN - ALK	PTN	Secreted Signaling	PMID: 28356350; PMID: 25620911	NL	-0.171772	32.4001	46.2046	2.40283e-29	NA	NA	NA	NA
867	IP	Interneuron_S1	PTN	ALK	1.64546e-07	0	PTN_ALK	PTN - ALK	PTN	Secreted Signaling	PMID: 28356350; PMID: 25620911	NL	-0.195073	38.4662	43.498	2.12785e-05	NA	NA	NA	NA
868	oRG	Interneuron_S1	PTN	ALK	1.81995e-06	0	PTN_ALK	PTN - ALK	PTN	Secreted Signaling	PMID: 28356350; PMID: 25620911	NL	-1.53215	87.5549	71.2642	2.13527e-24	NA	NA	NA	NA
869	vRG	Interneuron_S1	PTN	ALK	1.34196e-06	0	PTN_ALK	PTN - ALK	PTN	Secreted Signaling	PMID: 28356350; PMID: 25620911	NL	-0.958902	69.332	75.7261	0.00284976	NA	NA	NA	NA
870	Cycling_progenitors	Interneuron_S1	PTN	ALK	3.08391e-07	0	PTN_ALK	PTN - ALK	PTN	Secreted Signaling	PMID: 28356350; PMID: 25620911	NL	-0.267752	58.9003	48	2.1354e-10	NA	NA	NA	NA
871	Layer_4-6_ExN	Interneuron_S1	PTN	ALK	1.32138e-07	0	PTN_ALK	PTN - ALK	PTN	Secreted Signaling	PMID: 28356350; PMID: 25620911	NL	-0.104666	33.6968	44.2484	8.24442e-14	NA	NA	NA	NA
872	Interneuron_3	Interneuron_S1	PTN	ALK	5.09965e-08	0	PTN_ALK	PTN - ALK	PTN	Secreted Signaling	PMID: 28356350; PMID: 25620911	NL	-0.0667606	19.2547	25.4902	0.00663257	NA	NA	NA	NA
873	Layer_5-6_ExN	Interneuron_S1	PTN	ALK	1.22604e-07	0	PTN_ALK	PTN - ALK	PTN	Secreted Signaling	PMID: 28356350; PMID: 25620911	NL	-0.113441	30.7362	42.6476	1.50925e-17	NA	NA	NA	NA
874	Smooth_muscle_1	Interneuron_S1	PTN	ALK	1.89497e-06	0	PTN_ALK	PTN - ALK	PTN	Secreted Signaling	PMID: 28356350; PMID: 25620911	NL	-0.877426	71.4286	81.3953	0.0151054	NA	NA	NA	NA
875	Layer_4-5_ExN	Interneuron_S1	PTN	ALK	1.44623e-07	0	PTN_ALK	PTN - ALK	PTN	Secreted Signaling	PMID: 28356350; PMID: 25620911	NL	-0.198625	32.8958	48.6762	4.93885e-08	NA	NA	NA	NA
876	Mig_Layer_2-3_ExN	Interneuron_S2	PTN	ALK	6.39897e-08	0	PTN_ALK	PTN - ALK	PTN	Secreted Signaling	PMID: 28356350; PMID: 25620911	NL	-0.115145	28.2182	37.6415	1.15989e-72	-0.0583848	47.7193	32.2667	1.53453e-05
877	Layer_2-4_ExN	Interneuron_S2	PTN	ALK	6.51494e-08	0	PTN_ALK	PTN - ALK	PTN	Secreted Signaling	PMID: 28356350; PMID: 25620911	NL	-0.140086	31.7318	38.8862	2.51992e-20	-0.0583848	47.7193	32.2667	1.53453e-05
878	Astrocyte_progenitors	Interneuron_S2	PTN	ALK	2.27604e-06	0	PTN_ALK	PTN - ALK	PTN	Secreted Signaling	PMID: 28356350; PMID: 25620911	NL	-3.33276	83.1845	89.3897	3.50741e-37	-0.0583848	47.7193	32.2667	1.53453e-05
879	Mig_Layer_2-4_ExN	Interneuron_S2	PTN	ALK	6.79429e-08	0	PTN_ALK	PTN - ALK	PTN	Secreted Signaling	PMID: 28356350; PMID: 25620911	NL	-0.171772	32.4001	46.2046	2.40283e-29	-0.0583848	47.7193	32.2667	1.53453e-05
880	IP	Interneuron_S2	PTN	ALK	7.8533e-08	0	PTN_ALK	PTN - ALK	PTN	Secreted Signaling	PMID: 28356350; PMID: 25620911	NL	-0.195073	38.4662	43.498	2.12785e-05	-0.0583848	47.7193	32.2667	1.53453e-05
881	oRG	Interneuron_S2	PTN	ALK	8.68608e-07	0	PTN_ALK	PTN - ALK	PTN	Secreted Signaling	PMID: 28356350; PMID: 25620911	NL	-1.53215	87.5549	71.2642	2.13527e-24	-0.0583848	47.7193	32.2667	1.53453e-05
882	vRG	Interneuron_S2	PTN	ALK	6.40475e-07	0	PTN_ALK	PTN - ALK	PTN	Secreted Signaling	PMID: 28356350; PMID: 25620911	NL	-0.958902	69.332	75.7261	0.00284976	-0.0583848	47.7193	32.2667	1.53453e-05
883	Cycling_progenitors	Interneuron_S2	PTN	ALK	1.47186e-07	0	PTN_ALK	PTN - ALK	PTN	Secreted Signaling	PMID: 28356350; PMID: 25620911	NL	-0.267752	58.9003	48	2.1354e-10	-0.0583848	47.7193	32.2667	1.53453e-05
884	Layer_4-6_ExN	Interneuron_S2	PTN	ALK	6.30653e-08	0	PTN_ALK	PTN - ALK	PTN	Secreted Signaling	PMID: 28356350; PMID: 25620911	NL	-0.104666	33.6968	44.2484	8.24442e-14	-0.0583848	47.7193	32.2667	1.53453e-05
885	Interneuron_3	Interneuron_S2	PTN	ALK	2.43391e-08	0	PTN_ALK	PTN - ALK	PTN	Secreted Signaling	PMID: 28356350; PMID: 25620911	NL	-0.0667606	19.2547	25.4902	0.00663257	-0.0583848	47.7193	32.2667	1.53453e-05
886	Layer_5-6_ExN	Interneuron_S2	PTN	ALK	5.85153e-08	0	PTN_ALK	PTN - ALK	PTN	Secreted Signaling	PMID: 28356350; PMID: 25620911	NL	-0.113441	30.7362	42.6476	1.50925e-17	-0.0583848	47.7193	32.2667	1.53453e-05
887	Smooth_muscle_1	Interneuron_S2	PTN	ALK	9.04414e-07	0	PTN_ALK	PTN - ALK	PTN	Secreted Signaling	PMID: 28356350; PMID: 25620911	NL	-0.877426	71.4286	81.3953	0.0151054	-0.0583848	47.7193	32.2667	1.53453e-05
888	Layer_4-5_ExN	Interneuron_S2	PTN	ALK	6.90239e-08	0	PTN_ALK	PTN - ALK	PTN	Secreted Signaling	PMID: 28356350; PMID: 25620911	NL	-0.198625	32.8958	48.6762	4.93885e-08	-0.0583848	47.7193	32.2667	1.53453e-05
889	Smooth_muscle_2	Smooth_muscle_2	EDN1	EDNRA	8.60716e-06	0	EDN1_EDNRA	EDN1 - EDNRA	EDN	Secreted Signaling	KEGG: hsa04080	NL	-6.70273	32.6389	60.7595	1.53169e-09	-2.63954	30.5556	46.2025	0.000704197
890	Smooth_muscle_2	Smooth_muscle_1	EDN1	EDNRA	2.35574e-05	0	EDN1_EDNRA	EDN1 - EDNRA	EDN	Secreted Signaling	KEGG: hsa04080	NL	-6.70273	32.6389	60.7595	1.53169e-09	-2.85356	69.7479	86.0465	0.00070797
891	Smooth_muscle_2	Astrocyte_progenitors	EDN1	EDNRB	1.07243e-06	0	EDN1_EDNRB	EDN1 - EDNRB	EDN	Secreted Signaling	KEGG: hsa04080	NL	-6.70273	32.6389	60.7595	1.53169e-09	0.11615	40.4762	39.3427	3.54353e-05
892	Interneuron_1	Smooth_muscle_2	KITLG	KIT	6.80109e-08	0	KITL_KIT	KITL - KIT	KIT	Secreted Signaling	KEGG: hsa04080	NL	-0.076943	22.0251	26.0686	0.0145738	NA	NA	NA	NA
893	Interneuron_3	Smooth_muscle_2	KITLG	KIT	7.52635e-08	0	KITL_KIT	KITL - KIT	KIT	Secreted Signaling	KEGG: hsa04080	NL	-0.0987246	34.6584	38.5337	0.00977161	NA	NA	NA	NA
894	Smooth_muscle_2	Smooth_muscle_2	KITLG	KIT	5.31883e-07	0	KITL_KIT	KITL - KIT	KIT	Secreted Signaling	KEGG: hsa04080	NL	-2.26976	47.2222	65.1899	9.9703e-05	NA	NA	NA	NA
895	IP_IN	Smooth_muscle_2	KITLG	KIT	7.38135e-08	0	KITL_KIT	KITL - KIT	KIT	Secreted Signaling	KEGG: hsa04080	NL	-0.15033	22.561	34.5345	0.0121792	NA	NA	NA	NA
896	Interneuron_1	Interneuron_S2	KITLG	KIT	7.90552e-08	0	KITL_KIT	KITL - KIT	KIT	Secreted Signaling	KEGG: hsa04080	NL	-0.076943	22.0251	26.0686	0.0145738	-0.481429	12.7193	31.4667	1.18775e-17
897	Interneuron_3	Interneuron_S2	KITLG	KIT	8.74855e-08	0	KITL_KIT	KITL - KIT	KIT	Secreted Signaling	KEGG: hsa04080	NL	-0.0987246	34.6584	38.5337	0.00977161	-0.481429	12.7193	31.4667	1.18775e-17
898	Smooth_muscle_2	Interneuron_S2	KITLG	KIT	6.18255e-07	0	KITL_KIT	KITL - KIT	KIT	Secreted Signaling	KEGG: hsa04080	NL	-2.26976	47.2222	65.1899	9.9703e-05	-0.481429	12.7193	31.4667	1.18775e-17
899	IP_IN	Interneuron_S2	KITLG	KIT	8.58e-08	0	KITL_KIT	KITL - KIT	KIT	Secreted Signaling	KEGG: hsa04080	NL	-0.15033	22.561	34.5345	0.0121792	-0.481429	12.7193	31.4667	1.18775e-17
900	Mig_Layer_2-4_ExN	Mig_Layer_2-3_ExN	SEMA3A	NRP1_PLXNA2	4.29562e-06	0	SEMA3A_NRP1_PLXNA2	SEMA3A - (NRP1+PLXNA2)	SEMA3	Secreted Signaling	PMID: 27533782	NL	-0.548752	68.7766	76.2376	1.1752e-37	-0.0896429	77.1657	74.2242	7.44375e-30
901	Layer_4-5_ExN	Mig_Layer_2-3_ExN	SEMA3A	NRP1_PLXNA2	1.90501e-06	0	SEMA3A_NRP1_PLXNA2	SEMA3A - (NRP1+PLXNA2)	SEMA3	Secreted Signaling	PMID: 27533782	NL	-0.384491	46.2674	52.9532	0.00331013	-0.0896429	77.1657	74.2242	7.44375e-30
902	Mig_Layer_2-4_ExN	Astrocyte_progenitors	SEMA3A	NRP1_PLXNA2	1.40595e-06	0	SEMA3A_NRP1_PLXNA2	SEMA3A - (NRP1+PLXNA2)	SEMA3	Secreted Signaling	PMID: 27533782	NL	-0.548752	68.7766	76.2376	1.1752e-37	-0.717852	31.7708	51.9249	2.49148e-14
903	Layer_4-5_ExN	Astrocyte_progenitors	SEMA3A	NRP1_PLXNA2	6.23507e-07	0	SEMA3A_NRP1_PLXNA2	SEMA3A - (NRP1+PLXNA2)	SEMA3	Secreted Signaling	PMID: 27533782	NL	-0.384491	46.2674	52.9532	0.00331013	-0.717852	31.7708	51.9249	2.49148e-14
904	Mig_Layer_2-4_ExN	Microglia_1	SEMA3A	NRP1_PLXNA2	5.5947e-07	0	SEMA3A_NRP1_PLXNA2	SEMA3A - (NRP1+PLXNA2)	SEMA3	Secreted Signaling	PMID: 27533782	NL	-0.548752	68.7766	76.2376	1.1752e-37	NA	NA	NA	NA
905	Layer_4-5_ExN	Microglia_1	SEMA3A	NRP1_PLXNA2	2.48112e-07	0	SEMA3A_NRP1_PLXNA2	SEMA3A - (NRP1+PLXNA2)	SEMA3	Secreted Signaling	PMID: 27533782	NL	-0.384491	46.2674	52.9532	0.00331013	NA	NA	NA	NA
906	Mig_Layer_2-4_ExN	Smooth_muscle_2	SEMA3A	NRP1_PLXNA2	9.39972e-06	0	SEMA3A_NRP1_PLXNA2	SEMA3A - (NRP1+PLXNA2)	SEMA3	Secreted Signaling	PMID: 27533782	NL	-0.548752	68.7766	76.2376	1.1752e-37	-2.93875	69.7917	79.4304	1.87997e-05
907	Layer_4-5_ExN	Smooth_muscle_2	SEMA3A	NRP1_PLXNA2	4.16858e-06	0	SEMA3A_NRP1_PLXNA2	SEMA3A - (NRP1+PLXNA2)	SEMA3	Secreted Signaling	PMID: 27533782	NL	-0.384491	46.2674	52.9532	0.00331013	-2.93875	69.7917	79.4304	1.87997e-05
908	Mig_Layer_2-4_ExN	Mig_Layer_2-3_ExN	SEMA3A	NRP1_PLXNA4	3.92879e-06	0	SEMA3A_NRP1_PLXNA4	SEMA3A - (NRP1+PLXNA4)	SEMA3	Secreted Signaling	PMID: 27533782	NL	-0.548752	68.7766	76.2376	1.1752e-37	-0.109421	71.2218	67.7226	1.16326e-21
909	Layer_4-5_ExN	Mig_Layer_2-3_ExN	SEMA3A	NRP1_PLXNA4	1.74233e-06	0	SEMA3A_NRP1_PLXNA4	SEMA3A - (NRP1+PLXNA4)	SEMA3	Secreted Signaling	PMID: 27533782	NL	-0.384491	46.2674	52.9532	0.00331013	-0.109421	71.2218	67.7226	1.16326e-21
910	Layer_4-6_ExN	Mig_Layer_2-3_ExN	SEMA3C	NRP1_PLXNA2	4.52851e-07	0	SEMA3C_NRP1_PLXNA2	SEMA3C - (NRP1+PLXNA2)	SEMA3	Secreted Signaling	PMID: 27533782	NL	-0.289659	33.0851	36.3102	1.38302e-05	-0.0896429	77.1657	74.2242	7.44375e-30
911	Layer_5-6_ExN	Mig_Layer_2-3_ExN	SEMA3C	NRP1_PLXNA2	4.1109e-06	0	SEMA3C_NRP1_PLXNA2	SEMA3C - (NRP1+PLXNA2)	SEMA3	Secreted Signaling	PMID: 27533782	NL	-0.222722	73.681	74.2208	0.0173592	-0.0896429	77.1657	74.2242	7.44375e-30
912	Layer_4-5_ExN	Mig_Layer_2-3_ExN	SEMA3C	NRP1_PLXNA2	9.99126e-07	0	SEMA3C_NRP1_PLXNA2	SEMA3C - (NRP1+PLXNA2)	SEMA3	Secreted Signaling	PMID: 27533782	NL	-0.776367	34.0443	49.0835	2.51454e-13	-0.0896429	77.1657	74.2242	7.44375e-30
913	Layer_5-6_ExN	Astrocyte_progenitors	SEMA3C	NRP1_PLXNA2	1.34549e-06	0	SEMA3C_NRP1_PLXNA2	SEMA3C - (NRP1+PLXNA2)	SEMA3	Secreted Signaling	PMID: 27533782	NL	-0.222722	73.681	74.2208	0.0173592	-0.717852	31.7708	51.9249	2.49148e-14
914	Layer_4-5_ExN	Astrocyte_progenitors	SEMA3C	NRP1_PLXNA2	3.27012e-07	0	SEMA3C_NRP1_PLXNA2	SEMA3C - (NRP1+PLXNA2)	SEMA3	Secreted Signaling	PMID: 27533782	NL	-0.776367	34.0443	49.0835	2.51454e-13	-0.717852	31.7708	51.9249	2.49148e-14
915	Layer_5-6_ExN	Microglia_1	SEMA3C	NRP1_PLXNA2	5.35412e-07	0	SEMA3C_NRP1_PLXNA2	SEMA3C - (NRP1+PLXNA2)	SEMA3	Secreted Signaling	PMID: 27533782	NL	-0.222722	73.681	74.2208	0.0173592	NA	NA	NA	NA
916	Layer_4-6_ExN	Smooth_muscle_2	SEMA3C	NRP1_PLXNA2	9.9094e-07	0	SEMA3C_NRP1_PLXNA2	SEMA3C - (NRP1+PLXNA2)	SEMA3	Secreted Signaling	PMID: 27533782	NL	-0.289659	33.0851	36.3102	1.38302e-05	-2.93875	69.7917	79.4304	1.87997e-05
917	Layer_5-6_ExN	Smooth_muscle_2	SEMA3C	NRP1_PLXNA2	8.99553e-06	0	SEMA3C_NRP1_PLXNA2	SEMA3C - (NRP1+PLXNA2)	SEMA3	Secreted Signaling	PMID: 27533782	NL	-0.222722	73.681	74.2208	0.0173592	-2.93875	69.7917	79.4304	1.87997e-05
918	Layer_4-5_ExN	Smooth_muscle_2	SEMA3C	NRP1_PLXNA2	2.18631e-06	0	SEMA3C_NRP1_PLXNA2	SEMA3C - (NRP1+PLXNA2)	SEMA3	Secreted Signaling	PMID: 27533782	NL	-0.776367	34.0443	49.0835	2.51454e-13	-2.93875	69.7917	79.4304	1.87997e-05
919	Layer_4-6_ExN	Mig_Layer_2-3_ExN	SEMA3C	NRP1_PLXNA4	4.1418e-07	0	SEMA3C_NRP1_PLXNA4	SEMA3C - (NRP1+PLXNA4)	SEMA3	Secreted Signaling	PMID: 27533782	NL	-0.289659	33.0851	36.3102	1.38302e-05	-0.109421	71.2218	67.7226	1.16326e-21
920	Layer_5-6_ExN	Mig_Layer_2-3_ExN	SEMA3C	NRP1_PLXNA4	3.75985e-06	0	SEMA3C_NRP1_PLXNA4	SEMA3C - (NRP1+PLXNA4)	SEMA3	Secreted Signaling	PMID: 27533782	NL	-0.222722	73.681	74.2208	0.0173592	-0.109421	71.2218	67.7226	1.16326e-21
921	Layer_4-5_ExN	Mig_Layer_2-3_ExN	SEMA3C	NRP1_PLXNA4	9.13806e-07	0	SEMA3C_NRP1_PLXNA4	SEMA3C - (NRP1+PLXNA4)	SEMA3	Secreted Signaling	PMID: 27533782	NL	-0.776367	34.0443	49.0835	2.51454e-13	-0.109421	71.2218	67.7226	1.16326e-21
922	Layer_4-6_ExN	Microglia_1	SEMA3C	NRP2_PLXNA2	6.19224e-08	0	SEMA3C_NRP2_PLXNA2	SEMA3C - (NRP2+PLXNA2)	SEMA3	Secreted Signaling	PMID: 27533782	NL	-0.289659	33.0851	36.3102	1.38302e-05	-0.442309	14.7186	34.4828	1.30754e-06
923	Layer_5-6_ExN	Microglia_1	SEMA3C	NRP2_PLXNA2	5.62122e-07	0	SEMA3C_NRP2_PLXNA2	SEMA3C - (NRP2+PLXNA2)	SEMA3	Secreted Signaling	PMID: 27533782	NL	-0.222722	73.681	74.2208	0.0173592	-0.442309	14.7186	34.4828	1.30754e-06
924	Layer_4-5_ExN	Microglia_1	SEMA3C	NRP2_PLXNA2	1.3662e-07	0	SEMA3C_NRP2_PLXNA2	SEMA3C - (NRP2+PLXNA2)	SEMA3	Secreted Signaling	PMID: 27533782	NL	-0.776367	34.0443	49.0835	2.51454e-13	-0.442309	14.7186	34.4828	1.30754e-06
925	Layer_4-6_ExN	Smooth_muscle_2	SEMA3C	NRP2_PLXNA2	4.60915e-07	0	SEMA3C_NRP2_PLXNA2	SEMA3C - (NRP2+PLXNA2)	SEMA3	Secreted Signaling	PMID: 27533782	NL	-0.289659	33.0851	36.3102	1.38302e-05	-1.71844	46.875	66.7722	1.6358e-05
926	Layer_5-6_ExN	Smooth_muscle_2	SEMA3C	NRP2_PLXNA2	4.1841e-06	0	SEMA3C_NRP2_PLXNA2	SEMA3C - (NRP2+PLXNA2)	SEMA3	Secreted Signaling	PMID: 27533782	NL	-0.222722	73.681	74.2208	0.0173592	-1.71844	46.875	66.7722	1.6358e-05
927	Layer_4-5_ExN	Smooth_muscle_2	SEMA3C	NRP2_PLXNA2	1.01692e-06	0	SEMA3C_NRP2_PLXNA2	SEMA3C - (NRP2+PLXNA2)	SEMA3	Secreted Signaling	PMID: 27533782	NL	-0.776367	34.0443	49.0835	2.51454e-13	-1.71844	46.875	66.7722	1.6358e-05
928	Smooth_muscle_2	Microglia_1	SEMA3G	NRP2_PLXNA2	7.72641e-08	0	SEMA3G_NRP2_PLXNA2	SEMA3G - (NRP2+PLXNA2)	SEMA3	Secreted Signaling	PMID: 27533782	NL	-0.75231	13.1944	32.2785	2.23637e-05	-0.442309	14.7186	34.4828	1.30754e-06
929	Smooth_muscle_2	Smooth_muscle_2	SEMA3G	NRP2_PLXNA2	5.75109e-07	0	SEMA3G_NRP2_PLXNA2	SEMA3G - (NRP2+PLXNA2)	SEMA3	Secreted Signaling	PMID: 27533782	NL	-0.75231	13.1944	32.2785	2.23637e-05	-1.71844	46.875	66.7722	1.6358e-05
930	Layer_4-6_ExN	Smooth_muscle_2	SEMA3C	NRP1_NRP2	8.81294e-07	0	SEMA3C_NRP1_NRP2	SEMA3C - (NRP1+NRP2)	SEMA3	Secreted Signaling	PMID: 27533782	NL	-0.289659	33.0851	36.3102	1.38302e-05	-2.50245	56.4815	77.0042	1.63343e-06
931	Layer_5-6_ExN	Smooth_muscle_2	SEMA3C	NRP1_NRP2	8.0002e-06	0	SEMA3C_NRP1_NRP2	SEMA3C - (NRP1+NRP2)	SEMA3	Secreted Signaling	PMID: 27533782	NL	-0.222722	73.681	74.2208	0.0173592	-2.50245	56.4815	77.0042	1.63343e-06
932	Layer_4-5_ExN	Smooth_muscle_2	SEMA3C	NRP1_NRP2	1.9444e-06	0	SEMA3C_NRP1_NRP2	SEMA3C - (NRP1+NRP2)	SEMA3	Secreted Signaling	PMID: 27533782	NL	-0.776367	34.0443	49.0835	2.51454e-13	-2.50245	56.4815	77.0042	1.63343e-06
933	Layer_4-6_ExN	Smooth_muscle_2	SEMA3C	PLXND1	9.88227e-07	0	SEMA3C_PLXND1	SEMA3C - PLXND1	SEMA3	Secreted Signaling	PMID: 27533782	NL	-0.289659	33.0851	36.3102	1.38302e-05	-2.30719	52.7778	77.8481	3.2079e-11
934	Layer_5-6_ExN	Smooth_muscle_2	SEMA3C	PLXND1	8.9709e-06	0	SEMA3C_PLXND1	SEMA3C - PLXND1	SEMA3	Secreted Signaling	PMID: 27533782	NL	-0.222722	73.681	74.2208	0.0173592	-2.30719	52.7778	77.8481	3.2079e-11
935	Layer_4-5_ExN	Smooth_muscle_2	SEMA3C	PLXND1	2.18032e-06	0	SEMA3C_PLXND1	SEMA3C - PLXND1	SEMA3	Secreted Signaling	PMID: 27533782	NL	-0.776367	34.0443	49.0835	2.51454e-13	-2.30719	52.7778	77.8481	3.2079e-11
936	Smooth_muscle_2	Smooth_muscle_2	ADM	CALCRL	5.62764e-06	0	ADM_CALCRL	ADM - CALCRL	CALCR	Secreted Signaling	KEGG: hsa04080	NL	-2.32525	27.7778	52.5316	1.93916e-07	-3.12459	51.3889	71.519	5.84943e-09
937	Smooth_muscle_2	OPC_1	ADM	CALCRL	4.46334e-07	0	ADM_CALCRL	ADM - CALCRL	CALCR	Secreted Signaling	KEGG: hsa04080	NL	-2.32525	27.7778	52.5316	1.93916e-07	NA	NA	NA	NA
938	Microglia_1	Smooth_muscle_2	GAS6	AXL	1.77807e-08	0	GAS6_AXL	GAS6 - AXL	GAS	Secreted Signaling	PMID: 27801848	NL	-0.136026	12.1212	27.5862	2.78368e-05	NA	NA	NA	NA
939	Smooth_muscle_2	Smooth_muscle_2	GAS6	AXL	1.52481e-07	0	GAS6_AXL	GAS6 - AXL	GAS	Secreted Signaling	PMID: 27801848	NL	-0.697385	18.0556	53.7975	1.46975e-11	NA	NA	NA	NA
940	Microglia_1	Smooth_muscle_1	GAS6	AXL	2.44743e-08	0	GAS6_AXL	GAS6 - AXL	GAS	Secreted Signaling	PMID: 27801848	NL	-0.136026	12.1212	27.5862	2.78368e-05	-0.227124	22.6891	41.8605	0.0494133
941	Smooth_muscle_2	Smooth_muscle_1	GAS6	AXL	2.09883e-07	0	GAS6_AXL	GAS6 - AXL	GAS	Secreted Signaling	PMID: 27801848	NL	-0.697385	18.0556	53.7975	1.46975e-11	-0.227124	22.6891	41.8605	0.0494133
942	Microglia_1	Microglia_1	GAS6	MERTK	3.31013e-07	0	GAS6_MERTK	GAS6 - MERTK	GAS	Secreted Signaling	PMID: 27801848	NL	-0.136026	12.1212	27.5862	2.78368e-05	NA	NA	NA	NA
943	Smooth_muscle_2	Microglia_1	GAS6	MERTK	2.83864e-06	0	GAS6_MERTK	GAS6 - MERTK	GAS	Secreted Signaling	PMID: 27801848	NL	-0.697385	18.0556	53.7975	1.46975e-11	NA	NA	NA	NA
944	Microglia_1	Smooth_muscle_2	GAS6	MERTK	2.49722e-08	0	GAS6_MERTK	GAS6 - MERTK	GAS	Secreted Signaling	PMID: 27801848	NL	-0.136026	12.1212	27.5862	2.78368e-05	-0.435791	22.2222	40.5063	0.000553922
945	Smooth_muscle_2	Smooth_muscle_2	GAS6	MERTK	2.14152e-07	0	GAS6_MERTK	GAS6 - MERTK	GAS	Secreted Signaling	PMID: 27801848	NL	-0.697385	18.0556	53.7975	1.46975e-11	-0.435791	22.2222	40.5063	0.000553922
946	Smooth_muscle_2	Mig_Layer_2-4_ExN	GRN	SORT1	1.65586e-07	0	GRN_SORT1	GRN - SORT1	GRN	Secreted Signaling	PMID: 29555433	NL	-0.703376	27.0833	48.1013	3.03763e-05	-0.0628772	26.476	30.33	3.06589e-05
947	Smooth_muscle_2	Cycling_progenitors	GRN	SORT1	1.76338e-07	0	GRN_SORT1	GRN - SORT1	GRN	Secreted Signaling	PMID: 29555433	NL	-0.703376	27.0833	48.1013	3.03763e-05	NA	NA	NA	NA
948	Smooth_muscle_2	Microglia_1	GRN	SORT1	1.73412e-07	0	GRN_SORT1	GRN - SORT1	GRN	Secreted Signaling	PMID: 29555433	NL	-0.703376	27.0833	48.1013	3.03763e-05	NA	NA	NA	NA
949	Smooth_muscle_2	Smooth_muscle_2	GRN	SORT1	1.3443e-06	0	GRN_SORT1	GRN - SORT1	GRN	Secreted Signaling	PMID: 29555433	NL	-0.703376	27.0833	48.1013	3.03763e-05	-1.35305	53.4722	72.7848	2.03693e-06
950	Smooth_muscle_2	Smooth_muscle_1	GRN	SORT1	1.70312e-07	0	GRN_SORT1	GRN - SORT1	GRN	Secreted Signaling	PMID: 29555433	NL	-0.703376	27.0833	48.1013	3.03763e-05	NA	NA	NA	NA
951	Smooth_muscle_2	Layer_4-5_ExN	GRN	SORT1	1.50523e-07	0	GRN_SORT1	GRN - SORT1	GRN	Secreted Signaling	PMID: 29555433	NL	-0.703376	27.0833	48.1013	3.03763e-05	NA	NA	NA	NA
952	Smooth_muscle_2	Interneuron_S2	GRN	SORT1	1.51168e-07	0	GRN_SORT1	GRN - SORT1	GRN	Secreted Signaling	PMID: 29555433	NL	-0.703376	27.0833	48.1013	3.03763e-05	NA	NA	NA	NA
953	Layer_2-4_ExN	Mig_Layer_2-3_ExN	PTPRS	NTRK3	8.25385e-07	0	PTPRS_NTRK3	PTPRS - NTRK3	PTPR	Secreted Signaling	PMID:21262467;PMID:25385546;	NL	-0.463994	89.5987	89.3503	9.23366e-13	NA	NA	NA	NA
954	Mig_Layer_2-4_ExN	Mig_Layer_2-3_ExN	PTPRS	NTRK3	8.28986e-07	0	PTPRS_NTRK3	PTPRS - NTRK3	PTPR	Secreted Signaling	PMID:21262467;PMID:25385546;	NL	-0.390795	89.1864	91.2871	1.93789e-10	NA	NA	NA	NA
955	Layer_4-6_ExN	Mig_Layer_2-3_ExN	PTPRS	NTRK3	6.87655e-07	0	PTPRS_NTRK3	PTPRS - NTRK3	PTPR	Secreted Signaling	PMID:21262467;PMID:25385546;	NL	-0.619631	84.3617	87.1371	8.355e-23	NA	NA	NA	NA
956	Layer_5-6_ExN	Mig_Layer_2-3_ExN	PTPRS	NTRK3	9.6061e-07	0	PTPRS_NTRK3	PTPRS - NTRK3	PTPR	Secreted Signaling	PMID:21262467;PMID:25385546;	NL	-0.655741	90.3067	92.9593	8.10922e-15	NA	NA	NA	NA
957	Layer_4-5_ExN	Mig_Layer_2-3_ExN	PTPRS	NTRK3	8.73842e-07	0	PTPRS_NTRK3	PTPRS - NTRK3	PTPR	Secreted Signaling	PMID:21262467;PMID:25385546;	NL	-0.879632	87.6948	91.6497	5.74347e-05	NA	NA	NA	NA
958	Mig_Layer_2-3_ExN	Layer_2-4_ExN	PTPRS	NTRK3	5.69183e-06	0	PTPRS_NTRK3	PTPRS - NTRK3	PTPR	Secreted Signaling	PMID:21262467;PMID:25385546;	NL	-0.210581	81.0075	82.0747	2.01094e-32	NA	NA	NA	NA
959	Layer_2-4_ExN	Layer_2-4_ExN	PTPRS	NTRK3	7.83602e-06	0	PTPRS_NTRK3	PTPRS - NTRK3	PTPR	Secreted Signaling	PMID:21262467;PMID:25385546;	NL	-0.463994	89.5987	89.3503	9.23366e-13	NA	NA	NA	NA
960	Astrocyte_progenitors	Layer_2-4_ExN	PTPRS	NTRK3	2.41453e-06	0	PTPRS_NTRK3	PTPRS - NTRK3	PTPR	Secreted Signaling	PMID:21262467;PMID:25385546;	NL	-0.375095	53.3482	66.1972	1.65547e-09	NA	NA	NA	NA
961	Interneuron_2	Layer_2-4_ExN	PTPRS	NTRK3	2.64093e-06	0	PTPRS_NTRK3	PTPRS - NTRK3	PTPR	Secreted Signaling	PMID:21262467;PMID:25385546;	NL	-0.207349	52.8874	59.2606	2.04215e-15	NA	NA	NA	NA
962	Mig_Layer_2-4_ExN	Layer_2-4_ExN	PTPRS	NTRK3	7.87021e-06	0	PTPRS_NTRK3	PTPRS - NTRK3	PTPR	Secreted Signaling	PMID:21262467;PMID:25385546;	NL	-0.390795	89.1864	91.2871	1.93789e-10	NA	NA	NA	NA
963	oRG	Layer_2-4_ExN	PTPRS	NTRK3	1.02655e-06	0	PTPRS_NTRK3	PTPRS - NTRK3	PTPR	Secreted Signaling	PMID:21262467;PMID:25385546;	NL	-0.119904	46.6857	50.8104	1.43854e-09	NA	NA	NA	NA
964	Interneuron_1	Layer_2-4_ExN	PTPRS	NTRK3	1.96806e-06	0	PTPRS_NTRK3	PTPRS - NTRK3	PTPR	Secreted Signaling	PMID:21262467;PMID:25385546;	NL	-0.125725	51.8847	56.3817	0.000609381	NA	NA	NA	NA
965	Layer_4-6_ExN	Layer_2-4_ExN	PTPRS	NTRK3	6.52845e-06	0	PTPRS_NTRK3	PTPRS - NTRK3	PTPR	Secreted Signaling	PMID:21262467;PMID:25385546;	NL	-0.619631	84.3617	87.1371	8.355e-23	NA	NA	NA	NA
966	Layer_5-6_ExN	Layer_2-4_ExN	PTPRS	NTRK3	9.1198e-06	0	PTPRS_NTRK3	PTPRS - NTRK3	PTPR	Secreted Signaling	PMID:21262467;PMID:25385546;	NL	-0.655741	90.3067	92.9593	8.10922e-15	NA	NA	NA	NA
967	OPC_1	Layer_2-4_ExN	PTPRS	NTRK3	2.39969e-06	0	PTPRS_NTRK3	PTPRS - NTRK3	PTPR	Secreted Signaling	PMID:21262467;PMID:25385546;	NL	-0.344373	55.8442	61.9926	0.013257	NA	NA	NA	NA
968	Layer_4-5_ExN	Layer_2-4_ExN	PTPRS	NTRK3	8.29605e-06	0	PTPRS_NTRK3	PTPRS - NTRK3	PTPR	Secreted Signaling	PMID:21262467;PMID:25385546;	NL	-0.879632	87.6948	91.6497	5.74347e-05	NA	NA	NA	NA
969	Mig_Layer_2-3_ExN	Astrocyte_progenitors	PTPRS	NTRK3	3.04484e-06	0	PTPRS_NTRK3	PTPRS - NTRK3	PTPR	Secreted Signaling	PMID:21262467;PMID:25385546;	NL	-0.210581	81.0075	82.0747	2.01094e-32	0.0853793	69.2708	68.3568	0.00112553
970	Layer_2-4_ExN	Astrocyte_progenitors	PTPRS	NTRK3	4.19188e-06	0	PTPRS_NTRK3	PTPRS - NTRK3	PTPR	Secreted Signaling	PMID:21262467;PMID:25385546;	NL	-0.463994	89.5987	89.3503	9.23366e-13	0.0853793	69.2708	68.3568	0.00112553
971	Astrocyte_progenitors	Astrocyte_progenitors	PTPRS	NTRK3	1.29165e-06	0	PTPRS_NTRK3	PTPRS - NTRK3	PTPR	Secreted Signaling	PMID:21262467;PMID:25385546;	NL	-0.375095	53.3482	66.1972	1.65547e-09	0.0853793	69.2708	68.3568	0.00112553
972	Interneuron_2	Astrocyte_progenitors	PTPRS	NTRK3	1.41276e-06	0	PTPRS_NTRK3	PTPRS - NTRK3	PTPR	Secreted Signaling	PMID:21262467;PMID:25385546;	NL	-0.207349	52.8874	59.2606	2.04215e-15	0.0853793	69.2708	68.3568	0.00112553
973	Mig_Layer_2-4_ExN	Astrocyte_progenitors	PTPRS	NTRK3	4.21016e-06	0	PTPRS_NTRK3	PTPRS - NTRK3	PTPR	Secreted Signaling	PMID:21262467;PMID:25385546;	NL	-0.390795	89.1864	91.2871	1.93789e-10	0.0853793	69.2708	68.3568	0.00112553
974	Interneuron_1	Astrocyte_progenitors	PTPRS	NTRK3	1.05281e-06	0	PTPRS_NTRK3	PTPRS - NTRK3	PTPR	Secreted Signaling	PMID:21262467;PMID:25385546;	NL	-0.125725	51.8847	56.3817	0.000609381	0.0853793	69.2708	68.3568	0.00112553
975	Layer_4-6_ExN	Astrocyte_progenitors	PTPRS	NTRK3	3.49239e-06	0	PTPRS_NTRK3	PTPRS - NTRK3	PTPR	Secreted Signaling	PMID:21262467;PMID:25385546;	NL	-0.619631	84.3617	87.1371	8.355e-23	0.0853793	69.2708	68.3568	0.00112553
976	Layer_5-6_ExN	Astrocyte_progenitors	PTPRS	NTRK3	4.87864e-06	0	PTPRS_NTRK3	PTPRS - NTRK3	PTPR	Secreted Signaling	PMID:21262467;PMID:25385546;	NL	-0.655741	90.3067	92.9593	8.10922e-15	0.0853793	69.2708	68.3568	0.00112553
977	OPC_1	Astrocyte_progenitors	PTPRS	NTRK3	1.28371e-06	0	PTPRS_NTRK3	PTPRS - NTRK3	PTPR	Secreted Signaling	PMID:21262467;PMID:25385546;	NL	-0.344373	55.8442	61.9926	0.013257	0.0853793	69.2708	68.3568	0.00112553
978	Layer_4-5_ExN	Astrocyte_progenitors	PTPRS	NTRK3	4.43797e-06	0	PTPRS_NTRK3	PTPRS - NTRK3	PTPR	Secreted Signaling	PMID:21262467;PMID:25385546;	NL	-0.879632	87.6948	91.6497	5.74347e-05	0.0853793	69.2708	68.3568	0.00112553
979	Mig_Layer_2-3_ExN	Mig_Layer_2-4_ExN	PTPRS	NTRK3	4.9475e-06	0	PTPRS_NTRK3	PTPRS - NTRK3	PTPR	Secreted Signaling	PMID:21262467;PMID:25385546;	NL	-0.210581	81.0075	82.0747	2.01094e-32	0.302142	83.2015	79.505	6.94823e-09
980	Layer_2-4_ExN	Mig_Layer_2-4_ExN	PTPRS	NTRK3	6.8113e-06	0	PTPRS_NTRK3	PTPRS - NTRK3	PTPR	Secreted Signaling	PMID:21262467;PMID:25385546;	NL	-0.463994	89.5987	89.3503	9.23366e-13	0.302142	83.2015	79.505	6.94823e-09
981	Astrocyte_progenitors	Mig_Layer_2-4_ExN	PTPRS	NTRK3	2.09877e-06	0	PTPRS_NTRK3	PTPRS - NTRK3	PTPR	Secreted Signaling	PMID:21262467;PMID:25385546;	NL	-0.375095	53.3482	66.1972	1.65547e-09	0.302142	83.2015	79.505	6.94823e-09
982	Interneuron_2	Mig_Layer_2-4_ExN	PTPRS	NTRK3	2.29557e-06	0	PTPRS_NTRK3	PTPRS - NTRK3	PTPR	Secreted Signaling	PMID:21262467;PMID:25385546;	NL	-0.207349	52.8874	59.2606	2.04215e-15	0.302142	83.2015	79.505	6.94823e-09
983	Mig_Layer_2-4_ExN	Mig_Layer_2-4_ExN	PTPRS	NTRK3	6.84101e-06	0	PTPRS_NTRK3	PTPRS - NTRK3	PTPR	Secreted Signaling	PMID:21262467;PMID:25385546;	NL	-0.390795	89.1864	91.2871	1.93789e-10	0.302142	83.2015	79.505	6.94823e-09
984	oRG	Mig_Layer_2-4_ExN	PTPRS	NTRK3	8.92303e-07	0	PTPRS_NTRK3	PTPRS - NTRK3	PTPR	Secreted Signaling	PMID:21262467;PMID:25385546;	NL	-0.119904	46.6857	50.8104	1.43854e-09	0.302142	83.2015	79.505	6.94823e-09
985	Interneuron_1	Mig_Layer_2-4_ExN	PTPRS	NTRK3	1.71069e-06	0	PTPRS_NTRK3	PTPRS - NTRK3	PTPR	Secreted Signaling	PMID:21262467;PMID:25385546;	NL	-0.125725	51.8847	56.3817	0.000609381	0.302142	83.2015	79.505	6.94823e-09
986	Layer_4-6_ExN	Mig_Layer_2-4_ExN	PTPRS	NTRK3	5.67471e-06	0	PTPRS_NTRK3	PTPRS - NTRK3	PTPR	Secreted Signaling	PMID:21262467;PMID:25385546;	NL	-0.619631	84.3617	87.1371	8.355e-23	0.302142	83.2015	79.505	6.94823e-09
987	Layer_5-6_ExN	Mig_Layer_2-4_ExN	PTPRS	NTRK3	7.92719e-06	0	PTPRS_NTRK3	PTPRS - NTRK3	PTPR	Secreted Signaling	PMID:21262467;PMID:25385546;	NL	-0.655741	90.3067	92.9593	8.10922e-15	0.302142	83.2015	79.505	6.94823e-09
988	OPC_1	Mig_Layer_2-4_ExN	PTPRS	NTRK3	2.08588e-06	0	PTPRS_NTRK3	PTPRS - NTRK3	PTPR	Secreted Signaling	PMID:21262467;PMID:25385546;	NL	-0.344373	55.8442	61.9926	0.013257	0.302142	83.2015	79.505	6.94823e-09
989	Layer_4-5_ExN	Mig_Layer_2-4_ExN	PTPRS	NTRK3	7.21117e-06	0	PTPRS_NTRK3	PTPRS - NTRK3	PTPR	Secreted Signaling	PMID:21262467;PMID:25385546;	NL	-0.879632	87.6948	91.6497	5.74347e-05	0.302142	83.2015	79.505	6.94823e-09
990	Layer_2-4_ExN	oRG	PTPRS	NTRK3	8.81603e-07	0	PTPRS_NTRK3	PTPRS - NTRK3	PTPR	Secreted Signaling	PMID:21262467;PMID:25385546;	NL	-0.463994	89.5987	89.3503	9.23366e-13	0.228964	58.9552	44.1491	2.84147e-49
991	Mig_Layer_2-4_ExN	oRG	PTPRS	NTRK3	8.85449e-07	0	PTPRS_NTRK3	PTPRS - NTRK3	PTPR	Secreted Signaling	PMID:21262467;PMID:25385546;	NL	-0.390795	89.1864	91.2871	1.93789e-10	0.228964	58.9552	44.1491	2.84147e-49
992	Layer_4-6_ExN	oRG	PTPRS	NTRK3	7.34492e-07	0	PTPRS_NTRK3	PTPRS - NTRK3	PTPR	Secreted Signaling	PMID:21262467;PMID:25385546;	NL	-0.619631	84.3617	87.1371	8.355e-23	0.228964	58.9552	44.1491	2.84147e-49
993	Layer_5-6_ExN	oRG	PTPRS	NTRK3	1.02604e-06	0	PTPRS_NTRK3	PTPRS - NTRK3	PTPR	Secreted Signaling	PMID:21262467;PMID:25385546;	NL	-0.655741	90.3067	92.9593	8.10922e-15	0.228964	58.9552	44.1491	2.84147e-49
994	Layer_4-5_ExN	oRG	PTPRS	NTRK3	9.3336e-07	0	PTPRS_NTRK3	PTPRS - NTRK3	PTPR	Secreted Signaling	PMID:21262467;PMID:25385546;	NL	-0.879632	87.6948	91.6497	5.74347e-05	0.228964	58.9552	44.1491	2.84147e-49
995	Mig_Layer_2-3_ExN	vRG	PTPRS	NTRK3	1.34618e-06	0	PTPRS_NTRK3	PTPRS - NTRK3	PTPR	Secreted Signaling	PMID:21262467;PMID:25385546;	NL	-0.210581	81.0075	82.0747	2.01094e-32	NA	NA	NA	NA
996	Layer_2-4_ExN	vRG	PTPRS	NTRK3	1.85331e-06	0	PTPRS_NTRK3	PTPRS - NTRK3	PTPR	Secreted Signaling	PMID:21262467;PMID:25385546;	NL	-0.463994	89.5987	89.3503	9.23366e-13	NA	NA	NA	NA
997	Mig_Layer_2-4_ExN	vRG	PTPRS	NTRK3	1.8614e-06	0	PTPRS_NTRK3	PTPRS - NTRK3	PTPR	Secreted Signaling	PMID:21262467;PMID:25385546;	NL	-0.390795	89.1864	91.2871	1.93789e-10	NA	NA	NA	NA
998	Layer_4-6_ExN	vRG	PTPRS	NTRK3	1.54406e-06	0	PTPRS_NTRK3	PTPRS - NTRK3	PTPR	Secreted Signaling	PMID:21262467;PMID:25385546;	NL	-0.619631	84.3617	87.1371	8.355e-23	NA	NA	NA	NA
999	Layer_5-6_ExN	vRG	PTPRS	NTRK3	2.15694e-06	0	PTPRS_NTRK3	PTPRS - NTRK3	PTPR	Secreted Signaling	PMID:21262467;PMID:25385546;	NL	-0.655741	90.3067	92.9593	8.10922e-15	NA	NA	NA	NA
1000	Layer_4-5_ExN	vRG	PTPRS	NTRK3	1.96212e-06	0	PTPRS_NTRK3	PTPRS - NTRK3	PTPR	Secreted Signaling	PMID:21262467;PMID:25385546;	NL	-0.879632	87.6948	91.6497	5.74347e-05	NA	NA	NA	NA
1001	Mig_Layer_2-3_ExN	Layer_4-6_ExN	PTPRS	NTRK3	1.39912e-05	0	PTPRS_NTRK3	PTPRS - NTRK3	PTPR	Secreted Signaling	PMID:21262467;PMID:25385546;	NL	-0.210581	81.0075	82.0747	2.01094e-32	-0.998276	94.5213	91.9515	2.2781e-10
1002	Layer_2-4_ExN	Layer_4-6_ExN	PTPRS	NTRK3	1.92618e-05	0	PTPRS_NTRK3	PTPRS - NTRK3	PTPR	Secreted Signaling	PMID:21262467;PMID:25385546;	NL	-0.463994	89.5987	89.3503	9.23366e-13	-0.998276	94.5213	91.9515	2.2781e-10
1003	Astrocyte_progenitors	Layer_4-6_ExN	PTPRS	NTRK3	5.93523e-06	0	PTPRS_NTRK3	PTPRS - NTRK3	PTPR	Secreted Signaling	PMID:21262467;PMID:25385546;	NL	-0.375095	53.3482	66.1972	1.65547e-09	-0.998276	94.5213	91.9515	2.2781e-10
1004	Interneuron_2	Layer_4-6_ExN	PTPRS	NTRK3	6.49175e-06	0	PTPRS_NTRK3	PTPRS - NTRK3	PTPR	Secreted Signaling	PMID:21262467;PMID:25385546;	NL	-0.207349	52.8874	59.2606	2.04215e-15	-0.998276	94.5213	91.9515	2.2781e-10
1005	Mig_Layer_2-4_ExN	Layer_4-6_ExN	PTPRS	NTRK3	1.93459e-05	0	PTPRS_NTRK3	PTPRS - NTRK3	PTPR	Secreted Signaling	PMID:21262467;PMID:25385546;	NL	-0.390795	89.1864	91.2871	1.93789e-10	-0.998276	94.5213	91.9515	2.2781e-10
1006	oRG	Layer_4-6_ExN	PTPRS	NTRK3	2.52339e-06	0	PTPRS_NTRK3	PTPRS - NTRK3	PTPR	Secreted Signaling	PMID:21262467;PMID:25385546;	NL	-0.119904	46.6857	50.8104	1.43854e-09	-0.998276	94.5213	91.9515	2.2781e-10
1007	vRG	Layer_4-6_ExN	PTPRS	NTRK3	1.56408e-06	0	PTPRS_NTRK3	PTPRS - NTRK3	PTPR	Secreted Signaling	PMID:21262467;PMID:25385546;	NL	-0.148542	41.3968	48.7552	0.000251809	-0.998276	94.5213	91.9515	2.2781e-10
1008	Interneuron_1	Layer_4-6_ExN	PTPRS	NTRK3	4.83776e-06	0	PTPRS_NTRK3	PTPRS - NTRK3	PTPR	Secreted Signaling	PMID:21262467;PMID:25385546;	NL	-0.125725	51.8847	56.3817	0.000609381	-0.998276	94.5213	91.9515	2.2781e-10
1009	Layer_4-6_ExN	Layer_4-6_ExN	PTPRS	NTRK3	1.60477e-05	0	PTPRS_NTRK3	PTPRS - NTRK3	PTPR	Secreted Signaling	PMID:21262467;PMID:25385546;	NL	-0.619631	84.3617	87.1371	8.355e-23	-0.998276	94.5213	91.9515	2.2781e-10
1010	Microglia_1	Layer_4-6_ExN	PTPRS	NTRK3	1.381e-06	0	PTPRS_NTRK3	PTPRS - NTRK3	PTPR	Secreted Signaling	PMID:21262467;PMID:25385546;	NL	-0.414621	21.645	33.9901	0.00489873	-0.998276	94.5213	91.9515	2.2781e-10
1011	Layer_5-6_ExN	Layer_4-6_ExN	PTPRS	NTRK3	2.24175e-05	0	PTPRS_NTRK3	PTPRS - NTRK3	PTPR	Secreted Signaling	PMID:21262467;PMID:25385546;	NL	-0.655741	90.3067	92.9593	8.10922e-15	-0.998276	94.5213	91.9515	2.2781e-10
1012	OPC_1	Layer_4-6_ExN	PTPRS	NTRK3	5.89876e-06	0	PTPRS_NTRK3	PTPRS - NTRK3	PTPR	Secreted Signaling	PMID:21262467;PMID:25385546;	NL	-0.344373	55.8442	61.9926	0.013257	-0.998276	94.5213	91.9515	2.2781e-10
1013	Layer_4-5_ExN	Layer_4-6_ExN	PTPRS	NTRK3	2.03926e-05	0	PTPRS_NTRK3	PTPRS - NTRK3	PTPR	Secreted Signaling	PMID:21262467;PMID:25385546;	NL	-0.879632	87.6948	91.6497	5.74347e-05	-0.998276	94.5213	91.9515	2.2781e-10
1014	Mig_Layer_2-3_ExN	Layer_5-6_ExN	PTPRS	NTRK3	1.37007e-05	0	PTPRS_NTRK3	PTPRS - NTRK3	PTPR	Secreted Signaling	PMID:21262467;PMID:25385546;	NL	-0.210581	81.0075	82.0747	2.01094e-32	-1.59884	92.6994	92.3726	2.6378e-27
1015	Layer_2-4_ExN	Layer_5-6_ExN	PTPRS	NTRK3	1.88619e-05	0	PTPRS_NTRK3	PTPRS - NTRK3	PTPR	Secreted Signaling	PMID:21262467;PMID:25385546;	NL	-0.463994	89.5987	89.3503	9.23366e-13	-1.59884	92.6994	92.3726	2.6378e-27
1016	Astrocyte_progenitors	Layer_5-6_ExN	PTPRS	NTRK3	5.81199e-06	0	PTPRS_NTRK3	PTPRS - NTRK3	PTPR	Secreted Signaling	PMID:21262467;PMID:25385546;	NL	-0.375095	53.3482	66.1972	1.65547e-09	-1.59884	92.6994	92.3726	2.6378e-27
1017	Interneuron_2	Layer_5-6_ExN	PTPRS	NTRK3	6.35696e-06	0	PTPRS_NTRK3	PTPRS - NTRK3	PTPR	Secreted Signaling	PMID:21262467;PMID:25385546;	NL	-0.207349	52.8874	59.2606	2.04215e-15	-1.59884	92.6994	92.3726	2.6378e-27
1018	Mig_Layer_2-4_ExN	Layer_5-6_ExN	PTPRS	NTRK3	1.89442e-05	0	PTPRS_NTRK3	PTPRS - NTRK3	PTPR	Secreted Signaling	PMID:21262467;PMID:25385546;	NL	-0.390795	89.1864	91.2871	1.93789e-10	-1.59884	92.6994	92.3726	2.6378e-27
1019	oRG	Layer_5-6_ExN	PTPRS	NTRK3	2.471e-06	0	PTPRS_NTRK3	PTPRS - NTRK3	PTPR	Secreted Signaling	PMID:21262467;PMID:25385546;	NL	-0.119904	46.6857	50.8104	1.43854e-09	-1.59884	92.6994	92.3726	2.6378e-27
1020	vRG	Layer_5-6_ExN	PTPRS	NTRK3	1.5316e-06	0	PTPRS_NTRK3	PTPRS - NTRK3	PTPR	Secreted Signaling	PMID:21262467;PMID:25385546;	NL	-0.148542	41.3968	48.7552	0.000251809	-1.59884	92.6994	92.3726	2.6378e-27
1021	Interneuron_1	Layer_5-6_ExN	PTPRS	NTRK3	4.73731e-06	0	PTPRS_NTRK3	PTPRS - NTRK3	PTPR	Secreted Signaling	PMID:21262467;PMID:25385546;	NL	-0.125725	51.8847	56.3817	0.000609381	-1.59884	92.6994	92.3726	2.6378e-27
1022	Layer_4-6_ExN	Layer_5-6_ExN	PTPRS	NTRK3	1.57145e-05	0	PTPRS_NTRK3	PTPRS - NTRK3	PTPR	Secreted Signaling	PMID:21262467;PMID:25385546;	NL	-0.619631	84.3617	87.1371	8.355e-23	-1.59884	92.6994	92.3726	2.6378e-27
1023	Microglia_1	Layer_5-6_ExN	PTPRS	NTRK3	1.35232e-06	0	PTPRS_NTRK3	PTPRS - NTRK3	PTPR	Secreted Signaling	PMID:21262467;PMID:25385546;	NL	-0.414621	21.645	33.9901	0.00489873	-1.59884	92.6994	92.3726	2.6378e-27
1024	Layer_5-6_ExN	Layer_5-6_ExN	PTPRS	NTRK3	2.1952e-05	0	PTPRS_NTRK3	PTPRS - NTRK3	PTPR	Secreted Signaling	PMID:21262467;PMID:25385546;	NL	-0.655741	90.3067	92.9593	8.10922e-15	-1.59884	92.6994	92.3726	2.6378e-27
1025	OPC_1	Layer_5-6_ExN	PTPRS	NTRK3	5.77628e-06	0	PTPRS_NTRK3	PTPRS - NTRK3	PTPR	Secreted Signaling	PMID:21262467;PMID:25385546;	NL	-0.344373	55.8442	61.9926	0.013257	-1.59884	92.6994	92.3726	2.6378e-27
1026	Layer_4-5_ExN	Layer_5-6_ExN	PTPRS	NTRK3	1.99692e-05	0	PTPRS_NTRK3	PTPRS - NTRK3	PTPR	Secreted Signaling	PMID:21262467;PMID:25385546;	NL	-0.879632	87.6948	91.6497	5.74347e-05	-1.59884	92.6994	92.3726	2.6378e-27
1027	Mig_Layer_2-3_ExN	OPC_1	PTPRS	NTRK3	8.31637e-06	0	PTPRS_NTRK3	PTPRS - NTRK3	PTPR	Secreted Signaling	PMID:21262467;PMID:25385546;	NL	-0.210581	81.0075	82.0747	2.01094e-32	NA	NA	NA	NA
1028	Layer_2-4_ExN	OPC_1	PTPRS	NTRK3	1.14493e-05	0	PTPRS_NTRK3	PTPRS - NTRK3	PTPR	Secreted Signaling	PMID:21262467;PMID:25385546;	NL	-0.463994	89.5987	89.3503	9.23366e-13	NA	NA	NA	NA
1029	Astrocyte_progenitors	OPC_1	PTPRS	NTRK3	3.52789e-06	0	PTPRS_NTRK3	PTPRS - NTRK3	PTPR	Secreted Signaling	PMID:21262467;PMID:25385546;	NL	-0.375095	53.3482	66.1972	1.65547e-09	NA	NA	NA	NA
1030	Interneuron_2	OPC_1	PTPRS	NTRK3	3.85868e-06	0	PTPRS_NTRK3	PTPRS - NTRK3	PTPR	Secreted Signaling	PMID:21262467;PMID:25385546;	NL	-0.207349	52.8874	59.2606	2.04215e-15	NA	NA	NA	NA
1031	Mig_Layer_2-4_ExN	OPC_1	PTPRS	NTRK3	1.14992e-05	0	PTPRS_NTRK3	PTPRS - NTRK3	PTPR	Secreted Signaling	PMID:21262467;PMID:25385546;	NL	-0.390795	89.1864	91.2871	1.93789e-10	NA	NA	NA	NA
1032	oRG	OPC_1	PTPRS	NTRK3	1.4999e-06	0	PTPRS_NTRK3	PTPRS - NTRK3	PTPR	Secreted Signaling	PMID:21262467;PMID:25385546;	NL	-0.119904	46.6857	50.8104	1.43854e-09	NA	NA	NA	NA
1033	vRG	OPC_1	PTPRS	NTRK3	9.29682e-07	0	PTPRS_NTRK3	PTPRS - NTRK3	PTPR	Secreted Signaling	PMID:21262467;PMID:25385546;	NL	-0.148542	41.3968	48.7552	0.000251809	NA	NA	NA	NA
1034	Interneuron_1	OPC_1	PTPRS	NTRK3	2.87555e-06	0	PTPRS_NTRK3	PTPRS - NTRK3	PTPR	Secreted Signaling	PMID:21262467;PMID:25385546;	NL	-0.125725	51.8847	56.3817	0.000609381	NA	NA	NA	NA
1035	Layer_4-6_ExN	OPC_1	PTPRS	NTRK3	9.53876e-06	0	PTPRS_NTRK3	PTPRS - NTRK3	PTPR	Secreted Signaling	PMID:21262467;PMID:25385546;	NL	-0.619631	84.3617	87.1371	8.355e-23	NA	NA	NA	NA
1036	Layer_5-6_ExN	OPC_1	PTPRS	NTRK3	1.3325e-05	0	PTPRS_NTRK3	PTPRS - NTRK3	PTPR	Secreted Signaling	PMID:21262467;PMID:25385546;	NL	-0.655741	90.3067	92.9593	8.10922e-15	NA	NA	NA	NA
1037	OPC_1	OPC_1	PTPRS	NTRK3	3.50621e-06	0	PTPRS_NTRK3	PTPRS - NTRK3	PTPR	Secreted Signaling	PMID:21262467;PMID:25385546;	NL	-0.344373	55.8442	61.9926	0.013257	NA	NA	NA	NA
1038	Layer_4-5_ExN	OPC_1	PTPRS	NTRK3	1.21214e-05	0	PTPRS_NTRK3	PTPRS - NTRK3	PTPR	Secreted Signaling	PMID:21262467;PMID:25385546;	NL	-0.879632	87.6948	91.6497	5.74347e-05	NA	NA	NA	NA
1039	Mig_Layer_2-3_ExN	OL	PTPRS	NTRK3	2.41951e-06	0	PTPRS_NTRK3	PTPRS - NTRK3	PTPR	Secreted Signaling	PMID:21262467;PMID:25385546;	NL	-0.210581	81.0075	82.0747	2.01094e-32	NA	NA	NA	NA
1040	Layer_2-4_ExN	OL	PTPRS	NTRK3	3.33098e-06	0	PTPRS_NTRK3	PTPRS - NTRK3	PTPR	Secreted Signaling	PMID:21262467;PMID:25385546;	NL	-0.463994	89.5987	89.3503	9.23366e-13	NA	NA	NA	NA
1041	Mig_Layer_2-4_ExN	OL	PTPRS	NTRK3	3.34551e-06	0	PTPRS_NTRK3	PTPRS - NTRK3	PTPR	Secreted Signaling	PMID:21262467;PMID:25385546;	NL	-0.390795	89.1864	91.2871	1.93789e-10	NA	NA	NA	NA
1042	Layer_4-6_ExN	OL	PTPRS	NTRK3	2.77515e-06	0	PTPRS_NTRK3	PTPRS - NTRK3	PTPR	Secreted Signaling	PMID:21262467;PMID:25385546;	NL	-0.619631	84.3617	87.1371	8.355e-23	NA	NA	NA	NA
1043	Layer_5-6_ExN	OL	PTPRS	NTRK3	3.8767e-06	0	PTPRS_NTRK3	PTPRS - NTRK3	PTPR	Secreted Signaling	PMID:21262467;PMID:25385546;	NL	-0.655741	90.3067	92.9593	8.10922e-15	NA	NA	NA	NA
1044	Layer_4-5_ExN	OL	PTPRS	NTRK3	3.52653e-06	0	PTPRS_NTRK3	PTPRS - NTRK3	PTPR	Secreted Signaling	PMID:21262467;PMID:25385546;	NL	-0.879632	87.6948	91.6497	5.74347e-05	NA	NA	NA	NA
1045	Mig_Layer_2-3_ExN	Layer_4-5_ExN	PTPRS	NTRK3	1.0728e-05	0	PTPRS_NTRK3	PTPRS - NTRK3	PTPR	Secreted Signaling	PMID:21262467;PMID:25385546;	NL	-0.210581	81.0075	82.0747	2.01094e-32	NA	NA	NA	NA
1046	Layer_2-4_ExN	Layer_4-5_ExN	PTPRS	NTRK3	1.47694e-05	0	PTPRS_NTRK3	PTPRS - NTRK3	PTPR	Secreted Signaling	PMID:21262467;PMID:25385546;	NL	-0.463994	89.5987	89.3503	9.23366e-13	NA	NA	NA	NA
1047	Astrocyte_progenitors	Layer_4-5_ExN	PTPRS	NTRK3	4.55093e-06	0	PTPRS_NTRK3	PTPRS - NTRK3	PTPR	Secreted Signaling	PMID:21262467;PMID:25385546;	NL	-0.375095	53.3482	66.1972	1.65547e-09	NA	NA	NA	NA
1048	Interneuron_2	Layer_4-5_ExN	PTPRS	NTRK3	4.97765e-06	0	PTPRS_NTRK3	PTPRS - NTRK3	PTPR	Secreted Signaling	PMID:21262467;PMID:25385546;	NL	-0.207349	52.8874	59.2606	2.04215e-15	NA	NA	NA	NA
1049	Mig_Layer_2-4_ExN	Layer_4-5_ExN	PTPRS	NTRK3	1.48338e-05	0	PTPRS_NTRK3	PTPRS - NTRK3	PTPR	Secreted Signaling	PMID:21262467;PMID:25385546;	NL	-0.390795	89.1864	91.2871	1.93789e-10	NA	NA	NA	NA
1050	oRG	Layer_4-5_ExN	PTPRS	NTRK3	1.93485e-06	0	PTPRS_NTRK3	PTPRS - NTRK3	PTPR	Secreted Signaling	PMID:21262467;PMID:25385546;	NL	-0.119904	46.6857	50.8104	1.43854e-09	NA	NA	NA	NA
1051	vRG	Layer_4-5_ExN	PTPRS	NTRK3	1.19928e-06	0	PTPRS_NTRK3	PTPRS - NTRK3	PTPR	Secreted Signaling	PMID:21262467;PMID:25385546;	NL	-0.148542	41.3968	48.7552	0.000251809	NA	NA	NA	NA
1052	Interneuron_1	Layer_4-5_ExN	PTPRS	NTRK3	3.70943e-06	0	PTPRS_NTRK3	PTPRS - NTRK3	PTPR	Secreted Signaling	PMID:21262467;PMID:25385546;	NL	-0.125725	51.8847	56.3817	0.000609381	NA	NA	NA	NA
1053	Layer_4-6_ExN	Layer_4-5_ExN	PTPRS	NTRK3	1.23049e-05	0	PTPRS_NTRK3	PTPRS - NTRK3	PTPR	Secreted Signaling	PMID:21262467;PMID:25385546;	NL	-0.619631	84.3617	87.1371	8.355e-23	NA	NA	NA	NA
1054	Microglia_1	Layer_4-5_ExN	PTPRS	NTRK3	1.0589e-06	0	PTPRS_NTRK3	PTPRS - NTRK3	PTPR	Secreted Signaling	PMID:21262467;PMID:25385546;	NL	-0.414621	21.645	33.9901	0.00489873	NA	NA	NA	NA
1055	Layer_5-6_ExN	Layer_4-5_ExN	PTPRS	NTRK3	1.7189e-05	0	PTPRS_NTRK3	PTPRS - NTRK3	PTPR	Secreted Signaling	PMID:21262467;PMID:25385546;	NL	-0.655741	90.3067	92.9593	8.10922e-15	NA	NA	NA	NA
1056	OPC_1	Layer_4-5_ExN	PTPRS	NTRK3	4.52296e-06	0	PTPRS_NTRK3	PTPRS - NTRK3	PTPR	Secreted Signaling	PMID:21262467;PMID:25385546;	NL	-0.344373	55.8442	61.9926	0.013257	NA	NA	NA	NA
1057	Layer_4-5_ExN	Layer_4-5_ExN	PTPRS	NTRK3	1.56364e-05	0	PTPRS_NTRK3	PTPRS - NTRK3	PTPR	Secreted Signaling	PMID:21262467;PMID:25385546;	NL	-0.879632	87.6948	91.6497	5.74347e-05	NA	NA	NA	NA
1058	Mig_Layer_2-3_ExN	Interneuron_M1	PTPRS	NTRK3	1.04096e-05	0	PTPRS_NTRK3	PTPRS - NTRK3	PTPR	Secreted Signaling	PMID:21262467;PMID:25385546;	NL	-0.210581	81.0075	82.0747	2.01094e-32	-1.32192	82.243	84.1286	1.75913e-15
1059	Layer_2-4_ExN	Interneuron_M1	PTPRS	NTRK3	1.4331e-05	0	PTPRS_NTRK3	PTPRS - NTRK3	PTPR	Secreted Signaling	PMID:21262467;PMID:25385546;	NL	-0.463994	89.5987	89.3503	9.23366e-13	-1.32192	82.243	84.1286	1.75913e-15
1060	Astrocyte_progenitors	Interneuron_M1	PTPRS	NTRK3	4.41587e-06	0	PTPRS_NTRK3	PTPRS - NTRK3	PTPR	Secreted Signaling	PMID:21262467;PMID:25385546;	NL	-0.375095	53.3482	66.1972	1.65547e-09	-1.32192	82.243	84.1286	1.75913e-15
1061	Interneuron_2	Interneuron_M1	PTPRS	NTRK3	4.82993e-06	0	PTPRS_NTRK3	PTPRS - NTRK3	PTPR	Secreted Signaling	PMID:21262467;PMID:25385546;	NL	-0.207349	52.8874	59.2606	2.04215e-15	-1.32192	82.243	84.1286	1.75913e-15
1062	Mig_Layer_2-4_ExN	Interneuron_M1	PTPRS	NTRK3	1.43936e-05	0	PTPRS_NTRK3	PTPRS - NTRK3	PTPR	Secreted Signaling	PMID:21262467;PMID:25385546;	NL	-0.390795	89.1864	91.2871	1.93789e-10	-1.32192	82.243	84.1286	1.75913e-15
1063	oRG	Interneuron_M1	PTPRS	NTRK3	1.87743e-06	0	PTPRS_NTRK3	PTPRS - NTRK3	PTPR	Secreted Signaling	PMID:21262467;PMID:25385546;	NL	-0.119904	46.6857	50.8104	1.43854e-09	-1.32192	82.243	84.1286	1.75913e-15
1064	vRG	Interneuron_M1	PTPRS	NTRK3	1.16369e-06	0	PTPRS_NTRK3	PTPRS - NTRK3	PTPR	Secreted Signaling	PMID:21262467;PMID:25385546;	NL	-0.148542	41.3968	48.7552	0.000251809	-1.32192	82.243	84.1286	1.75913e-15
1065	Interneuron_1	Interneuron_M1	PTPRS	NTRK3	3.59934e-06	0	PTPRS_NTRK3	PTPRS - NTRK3	PTPR	Secreted Signaling	PMID:21262467;PMID:25385546;	NL	-0.125725	51.8847	56.3817	0.000609381	-1.32192	82.243	84.1286	1.75913e-15
1066	Layer_4-6_ExN	Interneuron_M1	PTPRS	NTRK3	1.19397e-05	0	PTPRS_NTRK3	PTPRS - NTRK3	PTPR	Secreted Signaling	PMID:21262467;PMID:25385546;	NL	-0.619631	84.3617	87.1371	8.355e-23	-1.32192	82.243	84.1286	1.75913e-15
1067	Microglia_1	Interneuron_M1	PTPRS	NTRK3	1.02747e-06	0.02	PTPRS_NTRK3	PTPRS - NTRK3	PTPR	Secreted Signaling	PMID:21262467;PMID:25385546;	NL	-0.414621	21.645	33.9901	0.00489873	-1.32192	82.243	84.1286	1.75913e-15
1068	Layer_5-6_ExN	Interneuron_M1	PTPRS	NTRK3	1.66789e-05	0	PTPRS_NTRK3	PTPRS - NTRK3	PTPR	Secreted Signaling	PMID:21262467;PMID:25385546;	NL	-0.655741	90.3067	92.9593	8.10922e-15	-1.32192	82.243	84.1286	1.75913e-15
1069	OPC_1	Interneuron_M1	PTPRS	NTRK3	4.38874e-06	0	PTPRS_NTRK3	PTPRS - NTRK3	PTPR	Secreted Signaling	PMID:21262467;PMID:25385546;	NL	-0.344373	55.8442	61.9926	0.013257	-1.32192	82.243	84.1286	1.75913e-15
1070	Layer_4-5_ExN	Interneuron_M1	PTPRS	NTRK3	1.51724e-05	0	PTPRS_NTRK3	PTPRS - NTRK3	PTPR	Secreted Signaling	PMID:21262467;PMID:25385546;	NL	-0.879632	87.6948	91.6497	5.74347e-05	-1.32192	82.243	84.1286	1.75913e-15
1071	Layer_2-4_ExN	Mig_Layer_2-3_ExN	SLITRK5	PTPRS	2.39989e-06	0	SLITRK5_PTPRS	SLITRK5 - PTPRS	SLITRK	Secreted Signaling	PMID: 30648269;PMID: 30822649	NL	-0.190183	50.1232	55.0562	1.75532e-15	-0.210581	81.0075	82.0747	2.01094e-32
1072	Layer_2-4_ExN	Layer_2-4_ExN	SLITRK5	PTPRS	3.30397e-06	0	SLITRK5_PTPRS	SLITRK5 - PTPRS	SLITRK	Secreted Signaling	PMID: 30648269;PMID: 30822649	NL	-0.190183	50.1232	55.0562	1.75532e-15	-0.463994	89.5987	89.3503	9.23366e-13
1073	Layer_2-4_ExN	Astrocyte_progenitors	SLITRK5	PTPRS	1.01805e-06	0	SLITRK5_PTPRS	SLITRK5 - PTPRS	SLITRK	Secreted Signaling	PMID: 30648269;PMID: 30822649	NL	-0.190183	50.1232	55.0562	1.75532e-15	-0.375095	53.3482	66.1972	1.65547e-09
1074	Layer_2-4_ExN	Interneuron_2	SLITRK5	PTPRS	1.11351e-06	0	SLITRK5_PTPRS	SLITRK5 - PTPRS	SLITRK	Secreted Signaling	PMID: 30648269;PMID: 30822649	NL	-0.190183	50.1232	55.0562	1.75532e-15	-0.207349	52.8874	59.2606	2.04215e-15
1075	Layer_2-4_ExN	Mig_Layer_2-4_ExN	SLITRK5	PTPRS	3.31839e-06	0	SLITRK5_PTPRS	SLITRK5 - PTPRS	SLITRK	Secreted Signaling	PMID: 30648269;PMID: 30822649	NL	-0.190183	50.1232	55.0562	1.75532e-15	-0.390795	89.1864	91.2871	1.93789e-10
1076	Layer_2-4_ExN	IP	SLITRK5	PTPRS	1.20395e-06	0	SLITRK5_PTPRS	SLITRK5 - PTPRS	SLITRK	Secreted Signaling	PMID: 30648269;PMID: 30822649	NL	-0.190183	50.1232	55.0562	1.75532e-15	NA	NA	NA	NA
1077	Layer_2-4_ExN	oRG	SLITRK5	PTPRS	4.3283e-07	0	SLITRK5_PTPRS	SLITRK5 - PTPRS	SLITRK	Secreted Signaling	PMID: 30648269;PMID: 30822649	NL	-0.190183	50.1232	55.0562	1.75532e-15	-0.119904	46.6857	50.8104	1.43854e-09
1078	Layer_2-4_ExN	vRG	SLITRK5	PTPRS	2.68281e-07	0	SLITRK5_PTPRS	SLITRK5 - PTPRS	SLITRK	Secreted Signaling	PMID: 30648269;PMID: 30822649	NL	-0.190183	50.1232	55.0562	1.75532e-15	-0.148542	41.3968	48.7552	0.000251809
1079	Layer_2-4_ExN	Interneuron_1	SLITRK5	PTPRS	8.29809e-07	0	SLITRK5_PTPRS	SLITRK5 - PTPRS	SLITRK	Secreted Signaling	PMID: 30648269;PMID: 30822649	NL	-0.190183	50.1232	55.0562	1.75532e-15	-0.125725	51.8847	56.3817	0.000609381
1080	Layer_2-4_ExN	Cycling_progenitors	SLITRK5	PTPRS	1.09384e-06	0	SLITRK5_PTPRS	SLITRK5 - PTPRS	SLITRK	Secreted Signaling	PMID: 30648269;PMID: 30822649	NL	-0.190183	50.1232	55.0562	1.75532e-15	NA	NA	NA	NA
1081	Layer_2-4_ExN	Layer_4-6_ExN	SLITRK5	PTPRS	2.75265e-06	0	SLITRK5_PTPRS	SLITRK5 - PTPRS	SLITRK	Secreted Signaling	PMID: 30648269;PMID: 30822649	NL	-0.190183	50.1232	55.0562	1.75532e-15	-0.619631	84.3617	87.1371	8.355e-23
1082	Layer_2-4_ExN	Interneuron_3	SLITRK5	PTPRS	1.06653e-06	0	SLITRK5_PTPRS	SLITRK5 - PTPRS	SLITRK	Secreted Signaling	PMID: 30648269;PMID: 30822649	NL	-0.190183	50.1232	55.0562	1.75532e-15	NA	NA	NA	NA
1083	Layer_2-4_ExN	Microglia_1	SLITRK5	PTPRS	2.36878e-07	0	SLITRK5_PTPRS	SLITRK5 - PTPRS	SLITRK	Secreted Signaling	PMID: 30648269;PMID: 30822649	NL	-0.190183	50.1232	55.0562	1.75532e-15	-0.414621	21.645	33.9901	0.00489873
1084	Layer_2-4_ExN	Layer_5-6_ExN	SLITRK5	PTPRS	3.84527e-06	0	SLITRK5_PTPRS	SLITRK5 - PTPRS	SLITRK	Secreted Signaling	PMID: 30648269;PMID: 30822649	NL	-0.190183	50.1232	55.0562	1.75532e-15	-0.655741	90.3067	92.9593	8.10922e-15
1085	Layer_2-4_ExN	OPC_1	SLITRK5	PTPRS	1.0118e-06	0	SLITRK5_PTPRS	SLITRK5 - PTPRS	SLITRK	Secreted Signaling	PMID: 30648269;PMID: 30822649	NL	-0.190183	50.1232	55.0562	1.75532e-15	-0.344373	55.8442	61.9926	0.013257
1086	Layer_2-4_ExN	OL	SLITRK5	PTPRS	7.70865e-07	0	SLITRK5_PTPRS	SLITRK5 - PTPRS	SLITRK	Secreted Signaling	PMID: 30648269;PMID: 30822649	NL	-0.190183	50.1232	55.0562	1.75532e-15	NA	NA	NA	NA
1087	Layer_2-4_ExN	Interneuron_4	SLITRK5	PTPRS	7.5408e-07	0	SLITRK5_PTPRS	SLITRK5 - PTPRS	SLITRK	Secreted Signaling	PMID: 30648269;PMID: 30822649	NL	-0.190183	50.1232	55.0562	1.75532e-15	NA	NA	NA	NA
1088	Layer_2-4_ExN	IP_IN	SLITRK5	PTPRS	2.83244e-07	0	SLITRK5_PTPRS	SLITRK5 - PTPRS	SLITRK	Secreted Signaling	PMID: 30648269;PMID: 30822649	NL	-0.190183	50.1232	55.0562	1.75532e-15	0.136544	52.439	48.6486	0.000978137
1089	Layer_2-4_ExN	Smooth_muscle_1	SLITRK5	PTPRS	2.37673e-07	0	SLITRK5_PTPRS	SLITRK5 - PTPRS	SLITRK	Secreted Signaling	PMID: 30648269;PMID: 30822649	NL	-0.190183	50.1232	55.0562	1.75532e-15	NA	NA	NA	NA
1090	Layer_2-4_ExN	Layer_4-5_ExN	SLITRK5	PTPRS	3.49794e-06	0	SLITRK5_PTPRS	SLITRK5 - PTPRS	SLITRK	Secreted Signaling	PMID: 30648269;PMID: 30822649	NL	-0.190183	50.1232	55.0562	1.75532e-15	-0.879632	87.6948	91.6497	5.74347e-05
1091	Layer_2-4_ExN	Interneuron_M2	SLITRK5	PTPRS	1.09769e-06	0	SLITRK5_PTPRS	SLITRK5 - PTPRS	SLITRK	Secreted Signaling	PMID: 30648269;PMID: 30822649	NL	-0.190183	50.1232	55.0562	1.75532e-15	0.603037	74.2361	63.2603	1.48355e-16
1092	Layer_2-4_ExN	Interneuron_S1	SLITRK5	PTPRS	1.11911e-06	0	SLITRK5_PTPRS	SLITRK5 - PTPRS	SLITRK	Secreted Signaling	PMID: 30648269;PMID: 30822649	NL	-0.190183	50.1232	55.0562	1.75532e-15	NA	NA	NA	NA
1093	Layer_2-4_ExN	Interneuron_M1	SLITRK5	PTPRS	1.0386e-06	0	SLITRK5_PTPRS	SLITRK5 - PTPRS	SLITRK	Secreted Signaling	PMID: 30648269;PMID: 30822649	NL	-0.190183	50.1232	55.0562	1.75532e-15	0.433456	71.9626	61.5145	9.12239e-13
1094	Layer_2-4_ExN	Interneuron_S2	SLITRK5	PTPRS	2.36479e-06	0	SLITRK5_PTPRS	SLITRK5 - PTPRS	SLITRK	Secreted Signaling	PMID: 30648269;PMID: 30822649	NL	-0.190183	50.1232	55.0562	1.75532e-15	1.69953	92.807	82.6667	1.01223e-24
1095	Layer_2-4_ExN	Smooth_muscle_2	PPIA	BSG	2.96639e-06	0	PPIA_BSG	PPIA - BSG	CypA	Secreted Signaling	PMID: 36012604	NL	-0.306251	21.6473	33.1949	4.90061e-55	-11.9709	70.1389	87.9747	1.39938e-11
1096	Mig_Layer_2-4_ExN	Smooth_muscle_2	PPIA	BSG	2.14352e-06	0	PPIA_BSG	PPIA - BSG	CypA	Secreted Signaling	PMID: 36012604	NL	-0.145863	18.9491	27.6568	4.01039e-20	-11.9709	70.1389	87.9747	1.39938e-11
1097	Cycling_progenitors	Smooth_muscle_2	PPIA	BSG	2.35084e-06	0	PPIA_BSG	PPIA - BSG	CypA	Secreted Signaling	PMID: 36012604	NL	-0.139422	19.0121	27.6667	4.96895e-09	-11.9709	70.1389	87.9747	1.39938e-11
1098	Layer_4-6_ExN	Smooth_muscle_2	PPIA	BSG	2.03082e-06	0	PPIA_BSG	PPIA - BSG	CypA	Secreted Signaling	PMID: 36012604	NL	-0.236228	15.6117	29.6215	5.41428e-48	-11.9709	70.1389	87.9747	1.39938e-11
1099	Layer_5-6_ExN	Smooth_muscle_2	PPIA	BSG	1.28156e-06	0	PPIA_BSG	PPIA - BSG	CypA	Secreted Signaling	PMID: 36012604	NL	-0.1971	13.9571	27.4661	4.20984e-41	-11.9709	70.1389	87.9747	1.39938e-11
1100	Smooth_muscle_2	Smooth_muscle_2	PPIA	BSG	1.49766e-05	0	PPIA_BSG	PPIA - BSG	CypA	Secreted Signaling	PMID: 36012604	NL	-1.63184	31.25	58.8608	2.24713e-09	-11.9709	70.1389	87.9747	1.39938e-11
1101	Layer_4-5_ExN	Smooth_muscle_2	PPIA	BSG	1.32097e-06	0	PPIA_BSG	PPIA - BSG	CypA	Secreted Signaling	PMID: 36012604	NL	-0.0873588	19.8523	28.5132	0.000943024	-11.9709	70.1389	87.9747	1.39938e-11
1102	Layer_2-4_ExN	Smooth_muscle_1	PPIA	BSG	4.42463e-08	0	PPIA_BSG	PPIA - BSG	CypA	Secreted Signaling	PMID: 36012604	NL	-0.306251	21.6473	33.1949	4.90061e-55	NA	NA	NA	NA
1103	Mig_Layer_2-4_ExN	Smooth_muscle_1	PPIA	BSG	3.19725e-08	0	PPIA_BSG	PPIA - BSG	CypA	Secreted Signaling	PMID: 36012604	NL	-0.145863	18.9491	27.6568	4.01039e-20	NA	NA	NA	NA
1104	Cycling_progenitors	Smooth_muscle_1	PPIA	BSG	3.50649e-08	0	PPIA_BSG	PPIA - BSG	CypA	Secreted Signaling	PMID: 36012604	NL	-0.139422	19.0121	27.6667	4.96895e-09	NA	NA	NA	NA
1105	Layer_4-6_ExN	Smooth_muscle_1	PPIA	BSG	3.02915e-08	0	PPIA_BSG	PPIA - BSG	CypA	Secreted Signaling	PMID: 36012604	NL	-0.236228	15.6117	29.6215	5.41428e-48	NA	NA	NA	NA
1106	Layer_5-6_ExN	Smooth_muscle_1	PPIA	BSG	1.91155e-08	0	PPIA_BSG	PPIA - BSG	CypA	Secreted Signaling	PMID: 36012604	NL	-0.1971	13.9571	27.4661	4.20984e-41	NA	NA	NA	NA
1107	Smooth_muscle_2	Smooth_muscle_1	PPIA	BSG	2.23392e-07	0	PPIA_BSG	PPIA - BSG	CypA	Secreted Signaling	PMID: 36012604	NL	-1.63184	31.25	58.8608	2.24713e-09	NA	NA	NA	NA
1108	Layer_4-5_ExN	Smooth_muscle_1	PPIA	BSG	1.97034e-08	0.01	PPIA_BSG	PPIA - BSG	CypA	Secreted Signaling	PMID: 36012604	NL	-0.0873588	19.8523	28.5132	0.000943024	NA	NA	NA	NA
1109	Interneuron_3	Mig_Layer_2-3_ExN	SLIT1	ROBO1	2.49765e-06	0	SLIT1_ROBO1	SLIT1 - ROBO1	SLIT	Secreted Signaling	PMID:10102268	NL	-0.300307	57.8882	62.6598	7.76476e-07	-0.352213	76.8844	77.6933	5.94139e-20
1110	Layer_5-6_ExN	Mig_Layer_2-3_ExN	SLIT1	ROBO1	5.7605e-06	0	SLIT1_ROBO1	SLIT1 - ROBO1	SLIT	Secreted Signaling	PMID:10102268	NL	-0.270912	84.6012	86.322	0.00146437	-0.352213	76.8844	77.6933	5.94139e-20
1111	Interneuron_3	Layer_2-4_ExN	SLIT1	ROBO1	1.05081e-05	0	SLIT1_ROBO1	SLIT1 - ROBO1	SLIT	Secreted Signaling	PMID:10102268	NL	-0.300307	57.8882	62.6598	7.76476e-07	-8.2465	59.7853	73.913	3.36627e-137
1112	Layer_5-6_ExN	Layer_2-4_ExN	SLIT1	ROBO1	2.42353e-05	0	SLIT1_ROBO1	SLIT1 - ROBO1	SLIT	Secreted Signaling	PMID:10102268	NL	-0.270912	84.6012	86.322	0.00146437	-8.2465	59.7853	73.913	3.36627e-137
1113	Interneuron_3	Astrocyte_progenitors	SLIT1	ROBO1	1.30888e-06	0	SLIT1_ROBO1	SLIT1 - ROBO1	SLIT	Secreted Signaling	PMID:10102268	NL	-0.300307	57.8882	62.6598	7.76476e-07	0.91619	72.9167	67.23	2.26083e-12
1114	Layer_5-6_ExN	Astrocyte_progenitors	SLIT1	ROBO1	3.01876e-06	0	SLIT1_ROBO1	SLIT1 - ROBO1	SLIT	Secreted Signaling	PMID:10102268	NL	-0.270912	84.6012	86.322	0.00146437	0.91619	72.9167	67.23	2.26083e-12
1115	Interneuron_3	Interneuron_2	SLIT1	ROBO1	1.99815e-06	0	SLIT1_ROBO1	SLIT1 - ROBO1	SLIT	Secreted Signaling	PMID:10102268	NL	-0.300307	57.8882	62.6598	7.76476e-07	1.48042	81.5688	71.8115	7.23441e-42
1116	Layer_5-6_ExN	Interneuron_2	SLIT1	ROBO1	4.60848e-06	0	SLIT1_ROBO1	SLIT1 - ROBO1	SLIT	Secreted Signaling	PMID:10102268	NL	-0.270912	84.6012	86.322	0.00146437	1.48042	81.5688	71.8115	7.23441e-42
1117	Interneuron_3	Mig_Layer_2-4_ExN	SLIT1	ROBO1	1.63884e-06	0	SLIT1_ROBO1	SLIT1 - ROBO1	SLIT	Secreted Signaling	PMID:10102268	NL	-0.300307	57.8882	62.6598	7.76476e-07	1.74409	75.0862	69.802	3.4992e-19
1118	Layer_5-6_ExN	Mig_Layer_2-4_ExN	SLIT1	ROBO1	3.77976e-06	0	SLIT1_ROBO1	SLIT1 - ROBO1	SLIT	Secreted Signaling	PMID:10102268	NL	-0.270912	84.6012	86.322	0.00146437	1.74409	75.0862	69.802	3.4992e-19
1119	Interneuron_3	IP	SLIT1	ROBO1	1.1644e-06	0	SLIT1_ROBO1	SLIT1 - ROBO1	SLIT	Secreted Signaling	PMID:10102268	NL	-0.300307	57.8882	62.6598	7.76476e-07	NA	NA	NA	NA
1120	Layer_5-6_ExN	IP	SLIT1	ROBO1	2.68554e-06	0	SLIT1_ROBO1	SLIT1 - ROBO1	SLIT	Secreted Signaling	PMID:10102268	NL	-0.270912	84.6012	86.322	0.00146437	NA	NA	NA	NA
1121	Interneuron_3	oRG	SLIT1	ROBO1	1.44223e-06	0	SLIT1_ROBO1	SLIT1 - ROBO1	SLIT	Secreted Signaling	PMID:10102268	NL	-0.300307	57.8882	62.6598	7.76476e-07	-0.0576026	75.439	67.8444	3.1653e-07
1122	Layer_5-6_ExN	oRG	SLIT1	ROBO1	3.32632e-06	0	SLIT1_ROBO1	SLIT1 - ROBO1	SLIT	Secreted Signaling	PMID:10102268	NL	-0.270912	84.6012	86.322	0.00146437	-0.0576026	75.439	67.8444	3.1653e-07
1123	Interneuron_3	vRG	SLIT1	ROBO1	1.14099e-06	0	SLIT1_ROBO1	SLIT1 - ROBO1	SLIT	Secreted Signaling	PMID:10102268	NL	-0.300307	57.8882	62.6598	7.76476e-07	-0.348813	61.4372	63.7967	0.035588
1124	Layer_5-6_ExN	vRG	SLIT1	ROBO1	2.63155e-06	0	SLIT1_ROBO1	SLIT1 - ROBO1	SLIT	Secreted Signaling	PMID:10102268	NL	-0.270912	84.6012	86.322	0.00146437	-0.348813	61.4372	63.7967	0.035588
1125	Layer_5-6_ExN	Interneuron_1	SLIT1	ROBO1	6.93734e-07	0	SLIT1_ROBO1	SLIT1 - ROBO1	SLIT	Secreted Signaling	PMID:10102268	NL	-0.270912	84.6012	86.322	0.00146437	0.0593155	51.2934	45.5449	3.14969e-05
1126	Interneuron_3	Cycling_progenitors	SLIT1	ROBO1	1.45649e-06	0	SLIT1_ROBO1	SLIT1 - ROBO1	SLIT	Secreted Signaling	PMID:10102268	NL	-0.300307	57.8882	62.6598	7.76476e-07	0.277098	77.9124	64.5556	3.64892e-11
1127	Layer_5-6_ExN	Cycling_progenitors	SLIT1	ROBO1	3.35921e-06	0	SLIT1_ROBO1	SLIT1 - ROBO1	SLIT	Secreted Signaling	PMID:10102268	NL	-0.270912	84.6012	86.322	0.00146437	0.277098	77.9124	64.5556	3.64892e-11
1128	Interneuron_3	Layer_4-6_ExN	SLIT1	ROBO1	1.13683e-05	0	SLIT1_ROBO1	SLIT1 - ROBO1	SLIT	Secreted Signaling	PMID:10102268	NL	-0.300307	57.8882	62.6598	7.76476e-07	-2.95744	88.0585	87.6883	2.38244e-16
1129	Layer_5-6_ExN	Layer_4-6_ExN	SLIT1	ROBO1	2.62192e-05	0	SLIT1_ROBO1	SLIT1 - ROBO1	SLIT	Secreted Signaling	PMID:10102268	NL	-0.270912	84.6012	86.322	0.00146437	-2.95744	88.0585	87.6883	2.38244e-16
1130	Interneuron_3	Interneuron_3	SLIT1	ROBO1	1.5946e-06	0	SLIT1_ROBO1	SLIT1 - ROBO1	SLIT	Secreted Signaling	PMID:10102268	NL	-0.300307	57.8882	62.6598	7.76476e-07	2.55983	82.8571	69.9915	8.34449e-30
1131	Layer_5-6_ExN	Interneuron_3	SLIT1	ROBO1	3.67774e-06	0	SLIT1_ROBO1	SLIT1 - ROBO1	SLIT	Secreted Signaling	PMID:10102268	NL	-0.270912	84.6012	86.322	0.00146437	2.55983	82.8571	69.9915	8.34449e-30
1132	Interneuron_3	Layer_5-6_ExN	SLIT1	ROBO1	2.69899e-05	0	SLIT1_ROBO1	SLIT1 - ROBO1	SLIT	Secreted Signaling	PMID:10102268	NL	-0.300307	57.8882	62.6598	7.76476e-07	-5.79483	95	87.5688	3.16189e-08
1133	Layer_5-6_ExN	Layer_5-6_ExN	SLIT1	ROBO1	6.22467e-05	0	SLIT1_ROBO1	SLIT1 - ROBO1	SLIT	Secreted Signaling	PMID:10102268	NL	-0.270912	84.6012	86.322	0.00146437	-5.79483	95	87.5688	3.16189e-08
1134	Interneuron_3	OPC_1	SLIT1	ROBO1	1.03271e-06	0	SLIT1_ROBO1	SLIT1 - ROBO1	SLIT	Secreted Signaling	PMID:10102268	NL	-0.300307	57.8882	62.6598	7.76476e-07	0.259759	69.0167	64.2066	0.005385
1135	Layer_5-6_ExN	OPC_1	SLIT1	ROBO1	2.38182e-06	0	SLIT1_ROBO1	SLIT1 - ROBO1	SLIT	Secreted Signaling	PMID:10102268	NL	-0.270912	84.6012	86.322	0.00146437	0.259759	69.0167	64.2066	0.005385
1136	Interneuron_3	Interneuron_4	SLIT1	ROBO1	8.19198e-06	0	SLIT1_ROBO1	SLIT1 - ROBO1	SLIT	Secreted Signaling	PMID:10102268	NL	-0.300307	57.8882	62.6598	7.76476e-07	3.6977	92.437	83.5616	0.00283634
1137	Layer_5-6_ExN	Interneuron_4	SLIT1	ROBO1	1.88936e-05	0	SLIT1_ROBO1	SLIT1 - ROBO1	SLIT	Secreted Signaling	PMID:10102268	NL	-0.270912	84.6012	86.322	0.00146437	3.6977	92.437	83.5616	0.00283634
1138	Layer_5-6_ExN	IP_IN	SLIT1	ROBO1	6.80943e-07	0	SLIT1_ROBO1	SLIT1 - ROBO1	SLIT	Secreted Signaling	PMID:10102268	NL	-0.270912	84.6012	86.322	0.00146437	0.162732	49.3902	43.0931	0.00526084
1139	Layer_5-6_ExN	Smooth_muscle_1	SLIT1	ROBO1	1.08229e-06	0	SLIT1_ROBO1	SLIT1 - ROBO1	SLIT	Secreted Signaling	PMID:10102268	NL	-0.270912	84.6012	86.322	0.00146437	NA	NA	NA	NA
1140	Interneuron_3	Layer_4-5_ExN	SLIT1	ROBO1	9.47303e-06	0	SLIT1_ROBO1	SLIT1 - ROBO1	SLIT	Secreted Signaling	PMID:10102268	NL	-0.300307	57.8882	62.6598	7.76476e-07	4.17058	93.4372	90.4277	8.32126e-17
1141	Layer_5-6_ExN	Layer_4-5_ExN	SLIT1	ROBO1	2.18481e-05	0	SLIT1_ROBO1	SLIT1 - ROBO1	SLIT	Secreted Signaling	PMID:10102268	NL	-0.270912	84.6012	86.322	0.00146437	4.17058	93.4372	90.4277	8.32126e-17
1142	Interneuron_3	Interneuron_M2	SLIT1	ROBO1	2.7205e-05	0	SLIT1_ROBO1	SLIT1 - ROBO1	SLIT	Secreted Signaling	PMID:10102268	NL	-0.300307	57.8882	62.6598	7.76476e-07	NA	NA	NA	NA
1143	Layer_5-6_ExN	Interneuron_M2	SLIT1	ROBO1	6.27428e-05	0	SLIT1_ROBO1	SLIT1 - ROBO1	SLIT	Secreted Signaling	PMID:10102268	NL	-0.270912	84.6012	86.322	0.00146437	NA	NA	NA	NA
1144	Interneuron_3	Interneuron_S1	SLIT1	ROBO1	3.16523e-06	0	SLIT1_ROBO1	SLIT1 - ROBO1	SLIT	Secreted Signaling	PMID:10102268	NL	-0.300307	57.8882	62.6598	7.76476e-07	NA	NA	NA	NA
1145	Layer_5-6_ExN	Interneuron_S1	SLIT1	ROBO1	7.30016e-06	0	SLIT1_ROBO1	SLIT1 - ROBO1	SLIT	Secreted Signaling	PMID:10102268	NL	-0.270912	84.6012	86.322	0.00146437	NA	NA	NA	NA
1146	Interneuron_3	Interneuron_M1	SLIT1	ROBO1	2.12868e-05	0	SLIT1_ROBO1	SLIT1 - ROBO1	SLIT	Secreted Signaling	PMID:10102268	NL	-0.300307	57.8882	62.6598	7.76476e-07	0.136397	99.0654	99.0664	0.0321304
1147	Layer_5-6_ExN	Interneuron_M1	SLIT1	ROBO1	4.90939e-05	0	SLIT1_ROBO1	SLIT1 - ROBO1	SLIT	Secreted Signaling	PMID:10102268	NL	-0.270912	84.6012	86.322	0.00146437	0.136397	99.0654	99.0664	0.0321304
1148	Interneuron_3	Interneuron_S2	SLIT1	ROBO1	2.13466e-06	0	SLIT1_ROBO1	SLIT1 - ROBO1	SLIT	Secreted Signaling	PMID:10102268	NL	-0.300307	57.8882	62.6598	7.76476e-07	24.3064	94.2982	66.6667	3.68033e-90
1149	Layer_5-6_ExN	Interneuron_S2	SLIT1	ROBO1	4.92332e-06	0	SLIT1_ROBO1	SLIT1 - ROBO1	SLIT	Secreted Signaling	PMID:10102268	NL	-0.270912	84.6012	86.322	0.00146437	24.3064	94.2982	66.6667	3.68033e-90
1150	vRG	Mig_Layer_2-3_ExN	SLIT2	ROBO1	5.99885e-07	0	SLIT2_ROBO1	SLIT2 - ROBO1	SLIT	Secreted Signaling	PMID:10102268	NL	-0.269126	41.0931	34.0249	0.00802395	-0.352213	76.8844	77.6933	5.94139e-20
1151	vRG	Layer_2-4_ExN	SLIT2	ROBO1	2.52384e-06	0	SLIT2_ROBO1	SLIT2 - ROBO1	SLIT	Secreted Signaling	PMID:10102268	NL	-0.269126	41.0931	34.0249	0.00802395	-8.2465	59.7853	73.913	3.36627e-137
1152	vRG	Astrocyte_progenitors	SLIT2	ROBO1	3.14366e-07	0	SLIT2_ROBO1	SLIT2 - ROBO1	SLIT	Secreted Signaling	PMID:10102268	NL	-0.269126	41.0931	34.0249	0.00802395	0.91619	72.9167	67.23	2.26083e-12
1153	vRG	Interneuron_2	SLIT2	ROBO1	4.79915e-07	0	SLIT2_ROBO1	SLIT2 - ROBO1	SLIT	Secreted Signaling	PMID:10102268	NL	-0.269126	41.0931	34.0249	0.00802395	1.48042	81.5688	71.8115	7.23441e-42
1154	vRG	Mig_Layer_2-4_ExN	SLIT2	ROBO1	3.93614e-07	0	SLIT2_ROBO1	SLIT2 - ROBO1	SLIT	Secreted Signaling	PMID:10102268	NL	-0.269126	41.0931	34.0249	0.00802395	1.74409	75.0862	69.802	3.4992e-19
1155	vRG	IP	SLIT2	ROBO1	2.79665e-07	0	SLIT2_ROBO1	SLIT2 - ROBO1	SLIT	Secreted Signaling	PMID:10102268	NL	-0.269126	41.0931	34.0249	0.00802395	NA	NA	NA	NA
1156	vRG	oRG	SLIT2	ROBO1	3.46394e-07	0	SLIT2_ROBO1	SLIT2 - ROBO1	SLIT	Secreted Signaling	PMID:10102268	NL	-0.269126	41.0931	34.0249	0.00802395	-0.0576026	75.439	67.8444	3.1653e-07
1157	vRG	vRG	SLIT2	ROBO1	2.74043e-07	0	SLIT2_ROBO1	SLIT2 - ROBO1	SLIT	Secreted Signaling	PMID:10102268	NL	-0.269126	41.0931	34.0249	0.00802395	-0.348813	61.4372	63.7967	0.035588
1158	vRG	Interneuron_1	SLIT2	ROBO1	7.22434e-08	0	SLIT2_ROBO1	SLIT2 - ROBO1	SLIT	Secreted Signaling	PMID:10102268	NL	-0.269126	41.0931	34.0249	0.00802395	0.0593155	51.2934	45.5449	3.14969e-05
1159	vRG	Cycling_progenitors	SLIT2	ROBO1	3.49819e-07	0	SLIT2_ROBO1	SLIT2 - ROBO1	SLIT	Secreted Signaling	PMID:10102268	NL	-0.269126	41.0931	34.0249	0.00802395	0.277098	77.9124	64.5556	3.64892e-11
[truncated: 39 more rows]
