# Supplementary material for: Molecular Cartography of the Human and Mouse Down Syndrome Brain
Source: Research Square preprint supplement (doi:10.21203/rs.3.rs-5374449/v1), 2024-11-14
Supplement: Supplementary file 7 [file f13434d03223f2c55d011f66.xlsx]

## Sheet: Astrocyte_progenitors
p_val	avg_log2FC	pct.1	pct.2	p_val_adj	comparison	gene	FDR	sig	cellsubtype	CTL_expression	DS_expression
0.0011868	0.774016	0.056	0.043	1	DS_vs_CTL	SoloTE-LTR106-Mam	0.00363879	TRUE	Astrocyte_progenitors	0.109992	0.112492
0.0063922	0.752275	0.057	0.031	1	DS_vs_CTL	SoloTE-HERV-Fc1-int	0.0153886	TRUE	Astrocyte_progenitors	0.0753629	0.0751886
0.00471875	0.7183	0.098	0.063	1	DS_vs_CTL	SoloTE-HERVK22-int	0.0119346	TRUE	Astrocyte_progenitors	0.0900586	0.125516
0.00624486	0.651225	0.08	0.062	1	DS_vs_CTL	SoloTE-MER4C	0.0151706	TRUE	Astrocyte_progenitors	0.13225	0.147049
0.0024084	0.626387	0.129	0.089	1	DS_vs_CTL	SoloTE-LTR46-int	0.00669001	TRUE	Astrocyte_progenitors	0.245677	0.293236
0.147504	0.614351	0.051	0.037	1	DS_vs_CTL	SoloTE-MER34B	0.203995	FALSE	Astrocyte_progenitors	0.127162	0.147911
4.69451e-05	0.584567	0.173	0.138	0.0507946	DS_vs_CTL	SoloTE-LFSINE-Vert	0.00022437	TRUE	Astrocyte_progenitors	0.184061	0.311056
0.0992071	0.552846	0.063	0.05	1	DS_vs_CTL	SoloTE-Charlie3	0.148925	FALSE	Astrocyte_progenitors	0.100109	0.155202
0.0246378	0.543113	0.061	0.038	1	DS_vs_CTL	SoloTE-LTR7Y	0.0476624	TRUE	Astrocyte_progenitors	0.0887458	0.0892313
0.00649083	0.52696	0.081	0.051	1	DS_vs_CTL	SoloTE-LTR76	0.0155314	TRUE	Astrocyte_progenitors	0.0992956	0.110268
0.247888	0.506731	0.05	0.039	1	DS_vs_CTL	SoloTE-MER51B	0.313477	FALSE	Astrocyte_progenitors	0.0771196	0.0899033
0.0312478	0.504865	0.05	0.03	1	DS_vs_CTL	SoloTE-HUERS-P2-int	0.0559533	FALSE	Astrocyte_progenitors	0.0401545	0.0467441
0.000104645	0.484903	0.267	0.211	0.113226	DS_vs_CTL	SoloTE-MER4D1	0.000447495	TRUE	Astrocyte_progenitors	0.529581	0.600199
0.173168	0.463809	0.054	0.038	1	DS_vs_CTL	SoloTE-MER70B	0.23208	FALSE	Astrocyte_progenitors	0.0863546	0.085071
0.00663044	0.424711	0.132	0.114	1	DS_vs_CTL	SoloTE-Charlie25	0.0157868	TRUE	Astrocyte_progenitors	0.304057	0.392374
0.00017789	0.413028	0.203	0.182	0.192477	DS_vs_CTL	SoloTE-MER44A	0.000696559	TRUE	Astrocyte_progenitors	0.495864	0.688247
0.145642	0.39069	0.08	0.067	1	DS_vs_CTL	SoloTE-MER91B	0.20228	FALSE	Astrocyte_progenitors	0.108569	0.174371
0.0090092	0.387279	0.174	0.149	1	DS_vs_CTL	SoloTE-MER61-int	0.0203333	TRUE	Astrocyte_progenitors	0.323605	0.397881
0.282277	0.385858	0.062	0.047	1	DS_vs_CTL	SoloTE-LOR1b	0.351494	FALSE	Astrocyte_progenitors	0.111092	0.149292
1.13486e-05	0.382281	0.542	0.47	0.0122791	DS_vs_CTL	SoloTE-AluYk2	6.47067e-05	TRUE	Astrocyte_progenitors	1.71654	2.15274
0.0978457	0.370566	0.112	0.086	1	DS_vs_CTL	SoloTE-LTR2	0.147563	FALSE	Astrocyte_progenitors	0.198168	0.205456
0.0715345	0.363534	0.089	0.078	1	DS_vs_CTL	SoloTE-MLT2C2	0.113132	FALSE	Astrocyte_progenitors	0.114967	0.153068
0.0534297	0.361045	0.057	0.052	1	DS_vs_CTL	SoloTE-MER113B	0.0888217	FALSE	Astrocyte_progenitors	0.133075	0.155352
0.208432	0.328098	0.061	0.054	1	DS_vs_CTL	SoloTE-AluYk12	0.27205	FALSE	Astrocyte_progenitors	0.151677	0.141191
0.245612	0.29637	0.116	0.097	1	DS_vs_CTL	SoloTE-MER4A	0.311204	FALSE	Astrocyte_progenitors	0.196321	0.238551
0.446365	0.2762	0.092	0.078	1	DS_vs_CTL	SoloTE-MamGypLTR1b	0.513518	FALSE	Astrocyte_progenitors	0.0563622	0.0938444
0.402112	0.272419	0.075	0.068	1	DS_vs_CTL	SoloTE-LTR47A	0.472314	FALSE	Astrocyte_progenitors	0.118944	0.135639
3.09759e-05	0.261005	0.604	0.573	0.0335159	DS_vs_CTL	SoloTE-AluYk3	0.00015608	TRUE	Astrocyte_progenitors	2.30684	2.38561
0.453397	0.258669	0.057	0.052	1	DS_vs_CTL	SoloTE-PABL-A	0.517032	FALSE	Astrocyte_progenitors	0.120422	0.142606
0.123729	0.256711	0.149	0.137	1	DS_vs_CTL	SoloTE-AluYe6	0.175982	FALSE	Astrocyte_progenitors	0.383466	0.354482
0.616853	0.25094	0.062	0.053	1	DS_vs_CTL	SoloTE-LTR2B	0.663832	FALSE	Astrocyte_progenitors	0.096315	0.108743
0.395188	0.250465	0.126	0.114	1	DS_vs_CTL	SoloTE-HERVK11-int	0.465348	FALSE	Astrocyte_progenitors	0.0949253	0.14557
0.124536	0.248145	0.085	0.081	1	DS_vs_CTL	SoloTE-Tigger12	0.176743	FALSE	Astrocyte_progenitors	0.153177	0.209788
0.113128	0.240837	0.068	0.068	1	DS_vs_CTL	SoloTE-Kanga11a	0.164873	FALSE	Astrocyte_progenitors	0.150663	0.193887
0.116579	0.240428	0.065	0.064	1	DS_vs_CTL	SoloTE-MLT1H2-int	0.168824	FALSE	Astrocyte_progenitors	0.124727	0.158796
0.539699	0.235965	0.066	0.055	1	DS_vs_CTL	SoloTE-LTR52	0.59741	FALSE	Astrocyte_progenitors	0.115389	0.184328
0.0282366	0.23505	0.344	0.318	1	DS_vs_CTL	SoloTE-AluYc3	0.0521415	FALSE	Astrocyte_progenitors	1.0117	1.09814
0.352678	0.229558	0.05	0.039	1	DS_vs_CTL	SoloTE-Tigger3d	0.421399	FALSE	Astrocyte_progenitors	0.103281	0.137088
0.0129051	0.227643	0.284	0.275	1	DS_vs_CTL	SoloTE-Charlie1b	0.0274128	FALSE	Astrocyte_progenitors	0.80914	1.14262
0.564236	0.227501	0.068	0.057	1	DS_vs_CTL	SoloTE-LTR19A	0.616714	FALSE	Astrocyte_progenitors	0.0847714	0.109416
0.601429	0.220841	0.071	0.066	1	DS_vs_CTL	SoloTE-MER34-int	0.648572	FALSE	Astrocyte_progenitors	0.139743	0.143217
0.450053	0.20298	0.177	0.164	1	DS_vs_CTL	SoloTE-Cheshire	0.515934	FALSE	Astrocyte_progenitors	0.414525	0.565417
0.326325	0.194568	0.14	0.119	1	DS_vs_CTL	SoloTE-HERVH48-int	0.394993	FALSE	Astrocyte_progenitors	0.2415	0.33252
1.63051e-06	0.191734	0.999	0.998	0.00176421	DS_vs_CTL	SoloTE-AluSc8	1.09261e-05	FALSE	Astrocyte_progenitors	34.9828	38.0261
0.443412	0.191004	0.15	0.131	1	DS_vs_CTL	SoloTE-MER11A	0.511932	FALSE	Astrocyte_progenitors	0.226106	0.316756
3.22845e-07	0.190043	1	0.999	0.000349318	DS_vs_CTL	SoloTE-AluSp	2.41206e-06	FALSE	Astrocyte_progenitors	81.4726	89.2272
0.548757	0.18913	0.072	0.066	1	DS_vs_CTL	SoloTE-LTR48	0.604563	FALSE	Astrocyte_progenitors	0.118523	0.172519
0.00437226	0.188239	0.096	0.103	1	DS_vs_CTL	SoloTE-Tigger20a	0.0111014	FALSE	Astrocyte_progenitors	0.161106	0.271865
0.00965885	0.185461	0.24	0.241	1	DS_vs_CTL	SoloTE-Charlie1	0.0215009	FALSE	Astrocyte_progenitors	0.577154	0.759386
0.729576	0.183262	0.052	0.048	1	DS_vs_CTL	SoloTE-ERVL-int	0.768597	FALSE	Astrocyte_progenitors	0.0839332	0.131175
0.0319119	0.181139	0.211	0.205	1	DS_vs_CTL	SoloTE-MER50	0.0566741	FALSE	Astrocyte_progenitors	0.432828	0.536031
0.0020453	0.180516	0.978	0.974	1	DS_vs_CTL	SoloTE-AluSg7	0.0058825	FALSE	Astrocyte_progenitors	12.7043	13.9756
0.418999	0.177161	0.107	0.101	1	DS_vs_CTL	SoloTE-MER4E	0.486338	FALSE	Astrocyte_progenitors	0.288492	0.294668
0.177332	0.17681	0.058	0.059	1	DS_vs_CTL	SoloTE-LTR81A	0.236201	FALSE	Astrocyte_progenitors	0.111151	0.177966
0.000828114	0.176138	0.997	0.997	0.89602	DS_vs_CTL	SoloTE-AluSq	0.00262573	FALSE	Astrocyte_progenitors	29.2464	32.6396
0.22825	0.173779	0.134	0.13	1	DS_vs_CTL	SoloTE-MER34A	0.292656	FALSE	Astrocyte_progenitors	0.280805	0.345006
0.590163	0.1731	0.064	0.061	1	DS_vs_CTL	SoloTE-MamRep1879	0.64041	FALSE	Astrocyte_progenitors	0.0692383	0.112753
0.00047556	0.171755	0.999	1	0.514556	DS_vs_CTL	SoloTE-AluSx3	0.00165302	FALSE	Astrocyte_progenitors	38.8975	43.156
0.740432	0.170345	0.065	0.058	1	DS_vs_CTL	SoloTE-Tigger17c	0.775009	FALSE	Astrocyte_progenitors	0.108859	0.146711
0.132745	0.168982	0.132	0.131	1	DS_vs_CTL	SoloTE-MER4B	0.185557	FALSE	Astrocyte_progenitors	0.251236	0.338267
0.0292345	0.16581	0.987	0.985	1	DS_vs_CTL	SoloTE-AluSx4	0.053528	FALSE	Astrocyte_progenitors	16.4275	18.2692
0.000204858	0.165212	1	1	0.221657	DS_vs_CTL	SoloTE-AluSg	0.000783282	FALSE	Astrocyte_progenitors	52.9186	57.7848
0.594506	0.162395	0.101	0.092	1	DS_vs_CTL	SoloTE-MER66-int	0.644048	FALSE	Astrocyte_progenitors	0.164787	0.222563
7.26788e-05	0.16186	1	1	0.0786384	DS_vs_CTL	SoloTE-AluSx	0.00032357	FALSE	Astrocyte_progenitors	152.018	165.188
0.000513917	0.160134	1	1	0.556059	DS_vs_CTL	SoloTE-AluSq2	0.00177684	FALSE	Astrocyte_progenitors	79.6857	86.6684
0.40844	0.158909	0.129	0.122	1	DS_vs_CTL	SoloTE-LTR41	0.475782	FALSE	Astrocyte_progenitors	0.254332	0.318356
0.119664	0.155279	0.168	0.165	1	DS_vs_CTL	SoloTE-MER68	0.171704	FALSE	Astrocyte_progenitors	0.409658	0.608985
0.000429634	0.154203	0.937	0.938	0.464864	DS_vs_CTL	SoloTE-AluYm1	0.00150141	FALSE	Astrocyte_progenitors	8.82938	9.08026
0.637813	0.153644	0.065	0.056	1	DS_vs_CTL	SoloTE-MamGyp-int	0.681872	FALSE	Astrocyte_progenitors	0.120612	0.17886
2.01123e-07	0.149375	1	1	0.000217615	DS_vs_CTL	SoloTE-AluY	1.61395e-06	FALSE	Astrocyte_progenitors	194.888	202.255
0.561951	0.144085	0.054	0.052	1	DS_vs_CTL	SoloTE-Kanga1	0.616479	FALSE	Astrocyte_progenitors	0.139971	0.187381
0.502631	0.14365	0.05	0.05	1	DS_vs_CTL	SoloTE-LTR26	0.561357	FALSE	Astrocyte_progenitors	0.059514	0.0715268
0.0145842	0.13978	1	1	1	DS_vs_CTL	SoloTE-AluSz	0.0304814	FALSE	Astrocyte_progenitors	132.869	148.245
0.704702	0.13904	0.068	0.064	1	DS_vs_CTL	SoloTE-Kanga1c	0.744807	FALSE	Astrocyte_progenitors	0.187538	0.255838
0.0052507	0.135511	0.647	0.655	1	DS_vs_CTL	SoloTE-AluSq4	0.0130765	FALSE	Astrocyte_progenitors	2.82101	3.00094
0.117385	0.129051	0.117	0.123	1	DS_vs_CTL	SoloTE-HSMAR1	0.169557	FALSE	Astrocyte_progenitors	0.244831	0.359604
0.155905	0.128912	0.421	0.417	1	DS_vs_CTL	SoloTE-L1M4a1	0.211974	FALSE	Astrocyte_progenitors	1.17535	1.62632
0.0618138	0.123351	1	1	1	DS_vs_CTL	SoloTE-AluSx1	0.100447	FALSE	Astrocyte_progenitors	157.501	172.969
0.0659786	0.122124	1	0.999	1	DS_vs_CTL	SoloTE-AluSc	0.105631	FALSE	Astrocyte_progenitors	49.7449	54.5234
0.0277578	0.120521	0.773	0.772	1	DS_vs_CTL	SoloTE-Tigger3b	0.0516979	FALSE	Astrocyte_progenitors	3.18241	3.91064
0.522242	0.11903	0.24	0.228	1	DS_vs_CTL	SoloTE-Tigger7	0.581262	FALSE	Astrocyte_progenitors	0.596324	0.803797
0.00304616	0.117026	0.856	0.88	1	DS_vs_CTL	SoloTE-L1ME2	0.00811476	FALSE	Astrocyte_progenitors	4.39628	7.13742
0.0427647	0.112435	0.528	0.527	1	DS_vs_CTL	SoloTE-AluYk4	0.0723882	FALSE	Astrocyte_progenitors	1.84764	1.95631
0.00270789	0.111841	0.951	0.968	1	DS_vs_CTL	SoloTE-AluSg4	0.00736455	FALSE	Astrocyte_progenitors	10.3445	11.3836
0.0649406	0.110585	0.07	0.076	1	DS_vs_CTL	SoloTE-MER68B	0.104226	FALSE	Astrocyte_progenitors	0.106656	0.168422
0.215585	0.109595	0.121	0.122	1	DS_vs_CTL	SoloTE-Charlie24	0.279701	FALSE	Astrocyte_progenitors	0.256412	0.335144
0.0564458	0.108768	0.946	0.943	1	DS_vs_CTL	SoloTE-AluSc5	0.0928856	FALSE	Astrocyte_progenitors	9.97114	10.7813
0.151905	0.106137	0.213	0.212	1	DS_vs_CTL	SoloTE-Tigger3c	0.207434	FALSE	Astrocyte_progenitors	0.476607	0.657048
0.467075	0.105123	0.22	0.2	1	DS_vs_CTL	SoloTE-L1M2a	0.528918	FALSE	Astrocyte_progenitors	0.477723	0.631257
0.48978	0.104916	1	0.999	1	DS_vs_CTL	SoloTE-AluSz6	0.551746	FALSE	Astrocyte_progenitors	52.8738	60.3358
0.221372	0.102821	0.911	0.918	1	DS_vs_CTL	SoloTE-Tigger1	0.2855	FALSE	Astrocyte_progenitors	6.52378	8.70001
0.58342	0.102406	0.145	0.131	1	DS_vs_CTL	SoloTE-Tigger6a	0.635215	FALSE	Astrocyte_progenitors	0.214037	0.324209
0.365867	0.10123	0.143	0.14	1	DS_vs_CTL	SoloTE-LOR1-int	0.435556	FALSE	Astrocyte_progenitors	0.218008	0.356546
0.337362	0.0930676	0.132	0.134	1	DS_vs_CTL	SoloTE-MamRep38	0.404585	FALSE	Astrocyte_progenitors	0.313631	0.40109
0.788976	0.0915099	0.2	0.191	1	DS_vs_CTL	SoloTE-MER41B	0.814023	FALSE	Astrocyte_progenitors	0.572589	0.705249
0.00808939	0.0905819	0.234	0.252	1	DS_vs_CTL	SoloTE-MLT1E1A	0.0185799	FALSE	Astrocyte_progenitors	0.680537	1.08659
0.0905384	0.0878925	0.129	0.137	1	DS_vs_CTL	SoloTE-Looper	0.139455	FALSE	Astrocyte_progenitors	0.293457	0.369413
0.734798	0.0858832	0.067	0.067	1	DS_vs_CTL	SoloTE-Chap1-Mam	0.772846	FALSE	Astrocyte_progenitors	0.14911	0.205483
0.0975503	0.0850812	0.848	0.847	1	DS_vs_CTL	SoloTE-AluYj4	0.14746	FALSE	Astrocyte_progenitors	4.99139	4.8426
0.228272	0.0844427	0.294	0.289	1	DS_vs_CTL	SoloTE-Tigger2b-Pri	0.292656	FALSE	Astrocyte_progenitors	0.705697	0.843066
0.0189304	0.0833618	0.717	0.734	1	DS_vs_CTL	SoloTE-AluYh3	0.0379776	FALSE	Astrocyte_progenitors	3.28127	3.63502
0.460365	0.0806563	0.283	0.281	1	DS_vs_CTL	SoloTE-AluYb9	0.523143	FALSE	Astrocyte_progenitors	0.96892	0.981621
0.744762	0.0804977	0.15	0.145	1	DS_vs_CTL	SoloTE-LTR13	0.778288	FALSE	Astrocyte_progenitors	0.355393	0.360475
0.71336	0.0786671	0.128	0.126	1	DS_vs_CTL	SoloTE-LTR39	0.752734	FALSE	Astrocyte_progenitors	0.151068	0.182856
0.509584	0.0777606	0.051	0.051	1	DS_vs_CTL	SoloTE-MER57B1	0.568147	FALSE	Astrocyte_progenitors	0.0937158	0.123525
0.0134236	0.0752397	0.836	0.854	1	DS_vs_CTL	SoloTE-AluYc	0.0283289	FALSE	Astrocyte_progenitors	5.4862	5.81515
0.76931	0.0722531	0.19	0.184	1	DS_vs_CTL	SoloTE-Plat-L3	0.798804	FALSE	Astrocyte_progenitors	0.505001	0.65149
0.0120073	0.0715643	0.272	0.287	1	DS_vs_CTL	SoloTE-MER53	0.0260157	FALSE	Astrocyte_progenitors	0.431773	0.601794
0.915474	0.0708293	0.057	0.056	1	DS_vs_CTL	SoloTE-LTR40b	0.926207	FALSE	Astrocyte_progenitors	0.110922	0.140168
0.120258	0.069674	0.109	0.119	1	DS_vs_CTL	SoloTE-MER5C	0.172175	FALSE	Astrocyte_progenitors	0.392486	0.505322
0.368301	0.065811	0.061	0.063	1	DS_vs_CTL	SoloTE-Arthur1A	0.437277	FALSE	Astrocyte_progenitors	0.10722	0.164458
0.832188	0.0658092	0.056	0.054	1	DS_vs_CTL	SoloTE-LTR7C	0.855889	FALSE	Astrocyte_progenitors	0.10107	0.109316
0.697764	0.0623017	1	1	1	DS_vs_CTL	SoloTE-AluJb	0.738675	FALSE	Astrocyte_progenitors	115.367	130.694
0.737403	0.0554201	0.221	0.208	1	DS_vs_CTL	SoloTE-MER65-int	0.773084	FALSE	Astrocyte_progenitors	0.541008	0.613814
0.448809	0.0543724	0.67	0.67	1	DS_vs_CTL	SoloTE-AluYf1	0.515417	FALSE	Astrocyte_progenitors	3.02719	3.09015
0.54267	0.0523976	0.194	0.179	1	DS_vs_CTL	SoloTE-AluYd8	0.598872	FALSE	Astrocyte_progenitors	0.614071	0.590844
0.00670642	0.0517107	0.286	0.312	1	DS_vs_CTL	SoloTE-Tigger17a	0.0159094	FALSE	Astrocyte_progenitors	0.802771	1.06572
0.382574	0.0491602	0.979	0.978	1	DS_vs_CTL	SoloTE-AluJr4	0.452419	FALSE	Astrocyte_progenitors	15.1956	17.0374
0.107424	0.0481802	0.436	0.452	1	DS_vs_CTL	SoloTE-Tigger2	0.158335	FALSE	Astrocyte_progenitors	1.41416	1.95067
0.218042	0.0476438	0.179	0.187	1	DS_vs_CTL	SoloTE-MER31-int	0.282325	FALSE	Astrocyte_progenitors	0.395781	0.422483
0.212553	0.047629	0.066	0.07	1	DS_vs_CTL	SoloTE-LTR16E2	0.276873	FALSE	Astrocyte_progenitors	0.109368	0.187843
0.151251	0.0461231	0.146	0.153	1	DS_vs_CTL	SoloTE-LTR81B	0.207249	FALSE	Astrocyte_progenitors	1.16942	1.21531
0.00625494	0.0453895	0.586	0.63	1	DS_vs_CTL	SoloTE-L1MB1	0.0151706	FALSE	Astrocyte_progenitors	1.99731	3.43557
0.84609	0.044397	0.402	0.403	1	DS_vs_CTL	SoloTE-MER4-int	0.867442	FALSE	Astrocyte_progenitors	1.12481	1.19844
0.928754	0.042411	0.106	0.103	1	DS_vs_CTL	SoloTE-LTR10A	0.934504	FALSE	Astrocyte_progenitors	0.20292	0.2251
0.913575	0.0401719	0.079	0.075	1	DS_vs_CTL	SoloTE-LTR54B	0.926207	FALSE	Astrocyte_progenitors	0.148941	0.173623
0.392529	0.0401128	1	1	1	DS_vs_CTL	SoloTE-AluJo	0.463056	FALSE	Astrocyte_progenitors	59.3541	65.8885
0.0196475	0.0362443	0.079	0.088	1	DS_vs_CTL	SoloTE-Tigger10	0.0392949	FALSE	Astrocyte_progenitors	0.205166	0.301228
0.0197865	0.0355538	0.056	0.067	1	DS_vs_CTL	SoloTE-L1MEg2	0.0394516	FALSE	Astrocyte_progenitors	0.0986214	0.159918
0.495654	0.0345262	0.231	0.238	1	DS_vs_CTL	SoloTE-MER57A-int	0.556434	FALSE	Astrocyte_progenitors	0.49142	0.622162
0.845922	0.0320942	0.121	0.122	1	DS_vs_CTL	SoloTE-LTR17	0.867442	FALSE	Astrocyte_progenitors	0.425704	0.510762
0.234459	0.0278131	0.606	0.626	1	DS_vs_CTL	SoloTE-L1M4b	0.298236	FALSE	Astrocyte_progenitors	1.71944	2.29262
0.877592	0.0264548	0.106	0.107	1	DS_vs_CTL	SoloTE-MLT1J-int	0.895502	FALSE	Astrocyte_progenitors	0.182368	0.251078
0.884487	0.0242921	0.088	0.089	1	DS_vs_CTL	SoloTE-MER39B	0.901123	FALSE	Astrocyte_progenitors	0.154187	0.20377
0.922922	0.0213038	0.101	0.1	1	DS_vs_CTL	SoloTE-LTR37A	0.930077	FALSE	Astrocyte_progenitors	0.211001	0.282867
0.100236	0.0198277	1	1	1	DS_vs_CTL	SoloTE-AluJr	0.149568	FALSE	Astrocyte_progenitors	65.0634	72.5239
0.40632	0.0191562	0.149	0.156	1	DS_vs_CTL	SoloTE-MLT1A0-int	0.475014	FALSE	Astrocyte_progenitors	0.265513	0.417509
0.689698	0.016751	0.15	0.155	1	DS_vs_CTL	SoloTE-AluYh3a3	0.731327	FALSE	Astrocyte_progenitors	0.352604	0.384555
0.564531	0.0139615	0.268	0.274	1	DS_vs_CTL	SoloTE-MER41-int	0.616714	FALSE	Astrocyte_progenitors	0.499074	0.703045
0.871422	0.0103206	0.066	0.068	1	DS_vs_CTL	SoloTE-MER57E1	0.890604	FALSE	Astrocyte_progenitors	0.0952738	0.121894
0.0339092	0.00912561	0.429	0.46	1	DS_vs_CTL	SoloTE-MER30	0.0595702	FALSE	Astrocyte_progenitors	1.56851	1.97559
0.291933	0.00868636	0.083	0.089	1	DS_vs_CTL	SoloTE-MamRep4096	0.360754	FALSE	Astrocyte_progenitors	0.163392	0.186037
0.320086	0.00674574	0.117	0.124	1	DS_vs_CTL	SoloTE-Tigger9b	0.388889	FALSE	Astrocyte_progenitors	0.363572	0.434086
0.158563	0.0048426	0.82	0.849	1	DS_vs_CTL	SoloTE-L1ME3G	0.214721	FALSE	Astrocyte_progenitors	4.11562	6.00776
0.135484	0.0013589	0.069	0.078	1	DS_vs_CTL	SoloTE-LTR41C	0.188806	FALSE	Astrocyte_progenitors	0.11648	0.132857
0.0893527	0.00074372	0.258	0.279	1	DS_vs_CTL	SoloTE-Charlie5	0.137955	FALSE	Astrocyte_progenitors	0.767718	0.883771
0.266048	-0.000693555	0.199	0.214	1	DS_vs_CTL	SoloTE-Arthur1B	0.333223	FALSE	Astrocyte_progenitors	0.307488	0.422844
0.971233	-0.00309218	0.233	0.236	1	DS_vs_CTL	SoloTE-LTR49-int	0.97273	FALSE	Astrocyte_progenitors	0.554885	0.729293
0.0694396	-0.00431561	0.228	0.247	1	DS_vs_CTL	SoloTE-MLT1E2	0.110627	FALSE	Astrocyte_progenitors	0.683648	0.987433
0.00480707	-0.00677174	0.227	0.257	1	DS_vs_CTL	SoloTE-L1MEb	0.0121108	FALSE	Astrocyte_progenitors	0.564729	0.840156
0.223209	-0.00745686	0.353	0.374	1	DS_vs_CTL	SoloTE-AluYg6	0.287299	FALSE	Astrocyte_progenitors	1.40899	1.441
0.0271965	-0.0102644	0.139	0.158	1	DS_vs_CTL	SoloTE-MER119	0.0510169	FALSE	Astrocyte_progenitors	0.307066	0.518802
0.00830696	-0.0132352	0.231	0.262	1	DS_vs_CTL	SoloTE-Tigger4	0.0190124	FALSE	Astrocyte_progenitors	0.645329	0.849707
0.00231121	-0.013633	0.324	0.366	1	DS_vs_CTL	SoloTE-Charlie2b	0.00647537	FALSE	Astrocyte_progenitors	0.963731	1.1796
0.758771	-0.0159563	0.106	0.11	1	DS_vs_CTL	SoloTE-LTR8B	0.790386	FALSE	Astrocyte_progenitors	0.173413	0.25238
0.658514	-0.0161209	0.15	0.156	1	DS_vs_CTL	SoloTE-MER4E1	0.700547	FALSE	Astrocyte_progenitors	0.360474	0.472261
0.601675	-0.0182386	0.318	0.328	1	DS_vs_CTL	SoloTE-MER41A	0.648572	FALSE	Astrocyte_progenitors	0.89402	0.931704
0.0145258	-0.0195432	0.251	0.28	1	DS_vs_CTL	SoloTE-Charlie4a	0.0304574	FALSE	Astrocyte_progenitors	0.548378	0.74581
0.000324293	-0.0214373	0.617	0.678	0.350885	DS_vs_CTL	SoloTE-L1M3	0.0011776	FALSE	Astrocyte_progenitors	2.28777	3.06171
0.28213	-0.0241666	0.053	0.059	1	DS_vs_CTL	SoloTE-MER124	0.351494	FALSE	Astrocyte_progenitors	0.100056	0.11491
0.407627	-0.0248928	0.225	0.241	1	DS_vs_CTL	SoloTE-AluYk11	0.475686	FALSE	Astrocyte_progenitors	0.634469	0.652968
0.0267179	-0.0271069	0.664	0.706	1	DS_vs_CTL	SoloTE-Charlie1a	0.0504937	FALSE	Astrocyte_progenitors	2.97635	3.75921
0.894743	-0.0279293	0.173	0.169	1	DS_vs_CTL	SoloTE-LTR5B	0.909609	FALSE	Astrocyte_progenitors	0.3497	0.361298
0.382816	-0.02889	0.067	0.073	1	DS_vs_CTL	SoloTE-MER44D	0.452419	FALSE	Astrocyte_progenitors	0.146428	0.198954
0.0387902	-0.0297019	0.115	0.131	1	DS_vs_CTL	SoloTE-Tigger16a	0.0663517	FALSE	Astrocyte_progenitors	0.2142	0.362725
0.00181476	-0.0302283	0.159	0.187	1	DS_vs_CTL	SoloTE-MER2B	0.00530381	FALSE	Astrocyte_progenitors	0.393456	0.503701
0.0244071	-0.0304523	0.295	0.326	1	DS_vs_CTL	SoloTE-Tigger19b	0.0473571	FALSE	Astrocyte_progenitors	1.15607	1.34299
0.761307	-0.0310889	0.068	0.071	1	DS_vs_CTL	SoloTE-LTR1A2	0.791759	FALSE	Astrocyte_progenitors	0.0984298	0.172168
0.00796389	-0.0320062	0.701	0.757	1	DS_vs_CTL	SoloTE-L1ME3	0.0184725	FALSE	Astrocyte_progenitors	2.89402	4.39091
0.13565	-0.0338695	0.135	0.15	1	DS_vs_CTL	SoloTE-MER104	0.188806	FALSE	Astrocyte_progenitors	0.340805	0.447194
0.996553	-0.0349969	0.086	0.085	1	DS_vs_CTL	SoloTE-HUERS-P3-int	0.996553	FALSE	Astrocyte_progenitors	0.16603	0.177531
0.780177	-0.0395911	0.051	0.054	1	DS_vs_CTL	SoloTE-Kanga1d	0.806224	FALSE	Astrocyte_progenitors	0.105435	0.134547
0.324336	-0.0402389	0.119	0.131	1	DS_vs_CTL	SoloTE-LTR37-int	0.393318	FALSE	Astrocyte_progenitors	0.248794	0.301207
0.0095173	-0.0409304	0.917	0.931	1	DS_vs_CTL	SoloTE-L1MC5a	0.0212586	FALSE	Astrocyte_progenitors	7.00684	10.026
0.916233	-0.0422108	0.251	0.258	1	DS_vs_CTL	SoloTE-AluYi6	0.926207	FALSE	Astrocyte_progenitors	0.742693	0.727157
0.297899	-0.0427593	0.107	0.117	1	DS_vs_CTL	SoloTE-MER110-int	0.367396	FALSE	Astrocyte_progenitors	0.340752	0.286072
2.11078e-05	-0.0428712	0.306	0.363	0.0228386	DS_vs_CTL	SoloTE-Tigger3a	0.000108889	FALSE	Astrocyte_progenitors	0.850236	1.36352
0.0536903	-0.0431675	0.77	0.81	1	DS_vs_CTL	SoloTE-FRAM	0.0890272	FALSE	Astrocyte_progenitors	4.21324	4.39415
0.230094	-0.0450644	0.148	0.161	1	DS_vs_CTL	SoloTE-MamRep434	0.293834	FALSE	Astrocyte_progenitors	0.361959	0.439307
0.000360333	-0.0463008	0.278	0.324	0.389881	DS_vs_CTL	SoloTE-Tigger4b	0.00128691	FALSE	Astrocyte_progenitors	0.647477	0.975577
0.969869	-0.0493189	0.061	0.062	1	DS_vs_CTL	SoloTE-LTR53-int	0.97273	FALSE	Astrocyte_progenitors	0.101537	0.118367
0.259112	-0.0514213	0.222	0.241	1	DS_vs_CTL	SoloTE-MLT2D	0.327035	FALSE	Astrocyte_progenitors	0.417431	0.53641
0.646942	-0.0563525	0.182	0.194	1	DS_vs_CTL	SoloTE-MER21A	0.690496	FALSE	Astrocyte_progenitors	0.389737	0.475646
0.436565	-0.0567679	0.242	0.258	1	DS_vs_CTL	SoloTE-L1PA15-16	0.504924	FALSE	Astrocyte_progenitors	0.403693	0.499175
0.964243	-0.0575933	0.053	0.054	1	DS_vs_CTL	SoloTE-L1M3b	0.968714	FALSE	Astrocyte_progenitors	0.0786522	0.0925929
0.0633725	-0.0595885	0.083	0.099	1	DS_vs_CTL	SoloTE-MER106B	0.102214	FALSE	Astrocyte_progenitors	0.211905	0.288158
0.921254	-0.0621121	0.094	0.099	1	DS_vs_CTL	SoloTE-LTR9B	0.929837	FALSE	Astrocyte_progenitors	0.22856	0.282069
0.457659	-0.0623756	0.123	0.132	1	DS_vs_CTL	SoloTE-MER63C	0.520977	FALSE	Astrocyte_progenitors	0.332897	0.372826
0.130304	-0.0645879	0.786	0.811	1	DS_vs_CTL	SoloTE-L1MC3	0.182933	FALSE	Astrocyte_progenitors	3.5819	5.6904
0.0997794	-0.0673942	0.115	0.132	1	DS_vs_CTL	SoloTE-MSTB2	0.149439	FALSE	Astrocyte_progenitors	0.174476	0.255032
0.895615	-0.068279	0.101	0.103	1	DS_vs_CTL	SoloTE-MER9a3	0.909609	FALSE	Astrocyte_progenitors	0.188412	0.189048
0.45197	-0.0697763	0.194	0.208	1	DS_vs_CTL	SoloTE-MER4A1	0.516638	FALSE	Astrocyte_progenitors	0.406614	0.541162
0.00435023	-0.0704541	0.548	0.608	1	DS_vs_CTL	SoloTE-MER33	0.0111014	FALSE	Astrocyte_progenitors	2.00457	2.65965
0.0725451	-0.0725275	0.609	0.653	1	DS_vs_CTL	SoloTE-AluYe5	0.114452	FALSE	Astrocyte_progenitors	2.93684	2.89195
0.0180255	-0.0744697	0.098	0.117	1	DS_vs_CTL	SoloTE-LTR54	0.0363868	FALSE	Astrocyte_progenitors	0.257588	0.322426
0.00272511	-0.0752846	0.124	0.154	1	DS_vs_CTL	SoloTE-L1MDb	0.00738052	FALSE	Astrocyte_progenitors	0.255358	0.373532
0.0149276	-0.0776395	0.553	0.609	1	DS_vs_CTL	SoloTE-L1ME4c	0.0308029	FALSE	Astrocyte_progenitors	1.92515	2.83934
0.0087261	-0.0805417	0.632	0.689	1	DS_vs_CTL	SoloTE-MER58A	0.0197629	FALSE	Astrocyte_progenitors	2.43874	3.295
0.330742	-0.0810279	0.315	0.339	1	DS_vs_CTL	SoloTE-Charlie7	0.39906	FALSE	Astrocyte_progenitors	0.990411	1.33874
0.173984	-0.0825276	0.042	0.05	1	DS_vs_CTL	SoloTE-MLT1H-int	0.232694	FALSE	Astrocyte_progenitors	0.0816306	0.146447
2.05693e-05	-0.0839633	0.255	0.31	0.022256	DS_vs_CTL	SoloTE-Charlie8	0.00010696	FALSE	Astrocyte_progenitors	0.724304	0.930808
0.000143983	-0.084529	0.771	0.838	0.15579	DS_vs_CTL	SoloTE-L1MC4a	0.000574166	FALSE	Astrocyte_progenitors	3.45157	5.71215
0.261652	-0.0848885	0.102	0.115	1	DS_vs_CTL	SoloTE-Tigger3	0.329093	FALSE	Astrocyte_progenitors	0.309616	0.40137
0.861388	-0.085877	0.097	0.103	1	DS_vs_CTL	SoloTE-MamRep1151	0.881736	FALSE	Astrocyte_progenitors	0.180515	0.29402
0.0348094	-0.0879761	0.06	0.075	1	DS_vs_CTL	SoloTE-HERV16-int	0.0608229	FALSE	Astrocyte_progenitors	0.101069	0.155944
0.0272352	-0.0879858	0.564	0.617	1	DS_vs_CTL	SoloTE-AluSq10	0.0510169	FALSE	Astrocyte_progenitors	2.34918	2.44734
0.233279	-0.0887448	0.114	0.129	1	DS_vs_CTL	SoloTE-MER21-int	0.297317	FALSE	Astrocyte_progenitors	0.321212	0.444077
0.316321	-0.0902488	0.091	0.102	1	DS_vs_CTL	SoloTE-LTR50	0.385036	FALSE	Astrocyte_progenitors	0.181582	0.229426
0.0259941	-0.0908779	0.314	0.352	1	DS_vs_CTL	SoloTE-MADE1	0.049549	FALSE	Astrocyte_progenitors	0.7213	0.905948
5.75285e-05	-0.091097	0.345	0.41	0.0622458	DS_vs_CTL	SoloTE-MLT1A1	0.000263335	FALSE	Astrocyte_progenitors	1.04259	1.25546
0.468554	-0.0912459	0.071	0.08	1	DS_vs_CTL	SoloTE-MLT1J1-int	0.52967	FALSE	Astrocyte_progenitors	0.114542	0.140153
0.445621	-0.0913486	0.097	0.107	1	DS_vs_CTL	SoloTE-MER92-int	0.513518	FALSE	Astrocyte_progenitors	0.210533	0.270906
0.0314438	-0.0930664	0.043	0.055	1	DS_vs_CTL	SoloTE-PRIMA4-int	0.0560427	FALSE	Astrocyte_progenitors	0.112124	0.134046
0.557521	-0.0980445	0.113	0.124	1	DS_vs_CTL	SoloTE-MER63D	0.613178	FALSE	Astrocyte_progenitors	0.245603	0.289956
0.652531	-0.0992622	0.079	0.088	1	DS_vs_CTL	SoloTE-MER131	0.69532	FALSE	Astrocyte_progenitors	0.159704	0.228206
1.66929e-06	-0.101139	0.98	0.989	0.00180617	DS_vs_CTL	SoloTE-FLAM-C	1.10718e-05	FALSE	Astrocyte_progenitors	13.7188	14.5199
0.0223452	-0.101698	0.737	0.785	1	DS_vs_CTL	SoloTE-L1ME3B	0.0437482	FALSE	Astrocyte_progenitors	3.24343	4.65334
0.261756	-0.102905	0.063	0.074	1	DS_vs_CTL	SoloTE-MER121	0.329093	FALSE	Astrocyte_progenitors	0.139839	0.19128
0.123669	-0.103635	0.165	0.153	1	DS_vs_CTL	SoloTE-Ricksha	0.175982	FALSE	Astrocyte_progenitors	0.213622	0.333721
0.000129593	-0.10725	0.336	0.404	0.140219	DS_vs_CTL	SoloTE-MER112	0.000536531	FALSE	Astrocyte_progenitors	0.953395	1.28469
0.636512	-0.108512	0.12	0.132	1	DS_vs_CTL	SoloTE-Charlie15b	0.681603	FALSE	Astrocyte_progenitors	0.319186	0.421532
0.5022	-0.108787	0.068	0.066	1	DS_vs_CTL	SoloTE-LTR9A1	0.561357	FALSE	Astrocyte_progenitors	0.0844166	0.102707
0.000396143	-0.108875	0.333	0.393	0.428627	DS_vs_CTL	SoloTE-MER20B	0.00139942	FALSE	Astrocyte_progenitors	0.851428	1.18256
0.00801423	-0.111796	0.464	0.521	1	DS_vs_CTL	SoloTE-MLT1A	0.0184725	FALSE	Astrocyte_progenitors	1.36593	1.68149
2.47484e-05	-0.112248	0.332	0.406	0.0267778	DS_vs_CTL	SoloTE-MamRTE1	0.000126665	FALSE	Astrocyte_progenitors	1.1084	1.74805
0.00173092	-0.112646	0.789	0.843	1	DS_vs_CTL	SoloTE-L1MD1	0.00511409	FALSE	Astrocyte_progenitors	3.35563	5.72151
4.50206e-06	-0.113032	0.331	0.405	0.00487123	DS_vs_CTL	SoloTE-Tigger4a	2.7607e-05	FALSE	Astrocyte_progenitors	1.07872	1.4932
0.000216729	-0.114412	0.301	0.363	0.234501	DS_vs_CTL	SoloTE-MamSINE1	0.000823824	FALSE	Astrocyte_progenitors	0.834092	1.13486
0.0342126	-0.115303	0.145	0.172	1	DS_vs_CTL	SoloTE-Tigger18a	0.0599412	FALSE	Astrocyte_progenitors	0.323825	0.442332
0.682136	-0.117081	0.118	0.129	1	DS_vs_CTL	SoloTE-HERV35I-int	0.724491	FALSE	Astrocyte_progenitors	0.321968	0.355005
0.000665197	-0.117134	0.856	0.9	0.719743	DS_vs_CTL	SoloTE-FLAM-A	0.00221732	FALSE	Astrocyte_progenitors	5.46301	6.03799
0.357308	-0.118241	0.082	0.095	1	DS_vs_CTL	SoloTE-MER34B-int	0.426148	FALSE	Astrocyte_progenitors	0.230153	0.232835
0.191203	-0.119824	0.188	0.214	1	DS_vs_CTL	SoloTE-CR1-Mam	0.252093	FALSE	Astrocyte_progenitors	0.472095	0.686156
0.035557	-0.120957	0.761	0.796	1	DS_vs_CTL	SoloTE-L1MD	0.0616321	FALSE	Astrocyte_progenitors	3.33213	4.14098
1.2338e-05	-0.121514	0.897	0.924	0.0133497	DS_vs_CTL	SoloTE-L1MB8	6.91351e-05	FALSE	Astrocyte_progenitors	7.0022	10.2539
0.00315458	-0.123097	0.531	0.598	1	DS_vs_CTL	SoloTE-L1MD3	0.00833528	FALSE	Astrocyte_progenitors	1.59025	2.24883
0.562419	-0.123213	0.185	0.202	1	DS_vs_CTL	SoloTE-MLT2B1	0.616479	FALSE	Astrocyte_progenitors	0.28647	0.42547
0.191849	-0.124327	0.05	0.062	1	DS_vs_CTL	SoloTE-MER75	0.252433	FALSE	Astrocyte_progenitors	0.133979	0.152545
0.595838	-0.124743	0.278	0.288	1	DS_vs_CTL	SoloTE-ERV3-16A3-I-int	0.644417	FALSE	Astrocyte_progenitors	0.472856	0.693246
1.05315e-05	-0.125838	0.856	0.909	0.0113951	DS_vs_CTL	SoloTE-L1ME3A	6.11204e-05	FALSE	Astrocyte_progenitors	4.42598	6.7247
0.776298	-0.126644	0.077	0.08	1	DS_vs_CTL	SoloTE-MLT1E1	0.803493	FALSE	Astrocyte_progenitors	0.165244	0.196727
0.115453	-0.127224	0.189	0.221	1	DS_vs_CTL	SoloTE-HERVS71-int	0.167885	FALSE	Astrocyte_progenitors	0.234036	0.285798
0.748549	-0.130171	0.091	0.096	1	DS_vs_CTL	SoloTE-LTR84b	0.780991	FALSE	Astrocyte_progenitors	0.230052	0.237617
1.37095e-05	-0.130558	0.574	0.667	0.0148337	DS_vs_CTL	SoloTE-MER2	7.48838e-05	FALSE	Astrocyte_progenitors	2.10353	2.97195
0.0709386	-0.130657	0.123	0.144	1	DS_vs_CTL	SoloTE-Charlie29a	0.112739	FALSE	Astrocyte_progenitors	0.32753	0.439973
3.9559e-10	-0.131455	0.993	0.991	4.28029e-07	DS_vs_CTL	SoloTE-L1M5	4.21531e-09	FALSE	Astrocyte_progenitors	14.9359	20.0054
0.000233663	-0.132319	0.851	0.872	0.252824	DS_vs_CTL	SoloTE-L1MD2	0.000877926	FALSE	Astrocyte_progenitors	4.83091	7.06959
0.0259941	-0.132515	0.841	0.865	1	DS_vs_CTL	SoloTE-L1MDa	0.049549	FALSE	Astrocyte_progenitors	4.66717	5.46021
0.205346	-0.132709	0.086	0.1	1	DS_vs_CTL	SoloTE-LTR23	0.268561	FALSE	Astrocyte_progenitors	0.157826	0.178121
8.69954e-05	-0.133312	0.318	0.387	0.094129	DS_vs_CTL	SoloTE-MER103C	0.00037951	FALSE	Astrocyte_progenitors	0.857053	1.31118
1.65089e-12	-0.133421	0.976	0.979	1.78626e-09	DS_vs_CTL	SoloTE-L1MB7	2.14616e-11	FALSE	Astrocyte_progenitors	10.5498	16.4218
0.00308061	-0.134279	0.063	0.085	1	DS_vs_CTL	SoloTE-Tigger16b	0.00817304	FALSE	Astrocyte_progenitors	0.172434	0.342406
0.0630803	-0.135959	0.314	0.355	1	DS_vs_CTL	SoloTE-Tigger2a	0.102214	FALSE	Astrocyte_progenitors	0.848608	1.10533
0.0064993	-0.139305	0.48	0.542	1	DS_vs_CTL	SoloTE-MER58B	0.0155314	FALSE	Astrocyte_progenitors	1.6631	2.20742
8.74431e-12	-0.139348	0.986	0.992	9.46135e-09	DS_vs_CTL	SoloTE-L2b	1.07242e-10	FALSE	Astrocyte_progenitors	13.1462	20.7618
0.00230142	-0.139823	0.165	0.204	1	DS_vs_CTL	SoloTE-MER47A	0.00647537	FALSE	Astrocyte_progenitors	0.41008	0.629941
0.404542	-0.140251	0.074	0.086	1	DS_vs_CTL	SoloTE-MLT1D-int	0.473788	FALSE	Astrocyte_progenitors	0.158727	0.227499
3.40632e-14	-0.140506	0.994	0.996	3.68564e-11	DS_vs_CTL	SoloTE-MIR	5.21236e-13	FALSE	Astrocyte_progenitors	20.7015	29.6986
7.19063e-08	-0.140569	0.891	0.937	7.78026e-05	DS_vs_CTL	SoloTE-L1MC5	6.23188e-07	FALSE	Astrocyte_progenitors	6.4992	9.17715
0.535086	-0.142518	0.052	0.059	1	DS_vs_CTL	SoloTE-LTR36	0.593526	FALSE	Astrocyte_progenitors	0.0987248	0.126849
0.00347589	-0.142575	0.478	0.545	1	DS_vs_CTL	SoloTE-L1ME3F	0.00907361	FALSE	Astrocyte_progenitors	1.67943	2.91552
6.89144e-06	-0.143468	0.912	0.931	0.00745653	DS_vs_CTL	SoloTE-L1ME4b	4.10957e-05	FALSE	Astrocyte_progenitors	6.10966	8.50414
0.00949594	-0.144011	0.158	0.195	1	DS_vs_CTL	SoloTE-OldhAT1	0.0212586	FALSE	Astrocyte_progenitors	0.357101	0.516156
0.018337	-0.148665	0.442	0.498	1	DS_vs_CTL	SoloTE-MER21C	0.036901	FALSE	Astrocyte_progenitors	1.15627	1.6344
0.623864	-0.148866	0.118	0.131	1	DS_vs_CTL	SoloTE-MER77	0.669161	FALSE	Astrocyte_progenitors	0.228918	0.293264
0.00995605	-0.149054	0.19	0.23	1	DS_vs_CTL	SoloTE-MARNA	0.0220117	FALSE	Astrocyte_progenitors	0.525019	0.701962
0.299329	-0.152075	0.135	0.156	1	DS_vs_CTL	SoloTE-LTR5-Hs	0.367796	FALSE	Astrocyte_progenitors	0.311101	0.313256
0.0331071	-0.152459	0.426	0.479	1	DS_vs_CTL	SoloTE-L1P3	0.0584772	FALSE	Astrocyte_progenitors	1.18494	1.70187
0.0013646	-0.152584	0.572	0.644	1	DS_vs_CTL	SoloTE-HAL1ME	0.00416428	FALSE	Astrocyte_progenitors	1.90599	2.92631
9.77487e-06	-0.154546	0.115	0.156	0.0105764	DS_vs_CTL	SoloTE-MER44B	5.72402e-05	FALSE	Astrocyte_progenitors	0.272322	0.480506
0.000893445	-0.155725	0.467	0.542	0.966708	DS_vs_CTL	SoloTE-L1MA5A	0.0028055	FALSE	Astrocyte_progenitors	1.23145	2.11585
1.19216e-05	-0.159743	0.818	0.851	0.0128992	DS_vs_CTL	SoloTE-L1MB4	6.7383e-05	FALSE	Astrocyte_progenitors	4.26255	6.64909
0.00775607	-0.161238	0.558	0.621	1	DS_vs_CTL	SoloTE-FAM	0.0180697	FALSE	Astrocyte_progenitors	2.2917	2.51663
0.540427	-0.162943	0.048	0.056	1	DS_vs_CTL	SoloTE-MLT1A-int	0.59741	FALSE	Astrocyte_progenitors	0.11017	0.152439
0.00681911	-0.164126	0.322	0.378	1	DS_vs_CTL	SoloTE-L1PB	0.0160595	FALSE	Astrocyte_progenitors	0.865482	0.906986
0.298439	-0.165319	0.107	0.123	1	DS_vs_CTL	SoloTE-MER31B	0.367396	FALSE	Astrocyte_progenitors	0.205164	0.27706
0.0633572	-0.168605	0.136	0.164	1	DS_vs_CTL	SoloTE-HERVIP10FH-int	0.102214	FALSE	Astrocyte_progenitors	0.296342	0.350366
3.10787e-07	-0.170874	0.778	0.858	0.000336271	DS_vs_CTL	SoloTE-MLT1D	2.34897e-06	FALSE	Astrocyte_progenitors	3.46541	4.5309
0.100325	-0.171512	0.15	0.177	1	DS_vs_CTL	SoloTE-L1PBa1	0.149568	FALSE	Astrocyte_progenitors	0.216996	0.293773
0.023219	-0.174981	0.101	0.127	1	DS_vs_CTL	SoloTE-MER44C	0.0451867	FALSE	Astrocyte_progenitors	0.294822	0.423081
0.0300292	-0.174988	0.196	0.235	1	DS_vs_CTL	SoloTE-MamTip2	0.0544241	FALSE	Astrocyte_progenitors	0.422191	0.533931
9.39164e-07	-0.177289	0.885	0.915	0.00101618	DS_vs_CTL	SoloTE-L1MEg	6.42586e-06	FALSE	Astrocyte_progenitors	5.84549	8.39954
0.00026892	-0.178125	0.614	0.693	0.290972	DS_vs_CTL	SoloTE-L1MC	0.000998848	FALSE	Astrocyte_progenitors	2.32513	3.11464
3.24934e-05	-0.178737	0.831	0.885	0.0351578	DS_vs_CTL	SoloTE-L1M1	0.00016017	FALSE	Astrocyte_progenitors	4.49795	6.0116
0.000131512	-0.180428	0.569	0.654	0.142296	DS_vs_CTL	SoloTE-MER3	0.000541031	FALSE	Astrocyte_progenitors	2.03512	2.62326
0.309712	-0.181258	0.061	0.073	1	DS_vs_CTL	SoloTE-MER50-int	0.378407	FALSE	Astrocyte_progenitors	0.152337	0.190865
0.402557	-0.182056	0.06	0.072	1	DS_vs_CTL	SoloTE-Charlie20a	0.472314	FALSE	Astrocyte_progenitors	0.175253	0.254395
0.0289995	-0.182222	0.26	0.305	1	DS_vs_CTL	SoloTE-L1MEj	0.0533985	FALSE	Astrocyte_progenitors	0.511899	0.855615
0.00799625	-0.183306	0.502	0.563	1	DS_vs_CTL	SoloTE-L1MEi	0.0184725	FALSE	Astrocyte_progenitors	1.44709	2.10421
0.00215417	-0.183901	0.055	0.075	1	DS_vs_CTL	SoloTE-Penelope1-Vert	0.00616833	FALSE	Astrocyte_progenitors	0.168973	0.223293
0.79438	-0.184655	0.057	0.062	1	DS_vs_CTL	SoloTE-L1M3de	0.818299	FALSE	Astrocyte_progenitors	0.142332	0.209755
0.000379368	-0.185209	0.275	0.338	0.410476	DS_vs_CTL	SoloTE-MER102b	0.00134748	FALSE	Astrocyte_progenitors	0.760023	1.03105
0.0175955	-0.185417	0.326	0.379	1	DS_vs_CTL	SoloTE-L4-C-Mam	0.0358454	FALSE	Astrocyte_progenitors	0.805203	1.09771
0.00159403	-0.185448	0.264	0.321	1	DS_vs_CTL	SoloTE-L1ME5	0.00479686	FALSE	Astrocyte_progenitors	0.731216	1.28463
1.68205e-05	-0.188883	0.733	0.801	0.0181998	DS_vs_CTL	SoloTE-L1ME3Cz	9.03582e-05	FALSE	Astrocyte_progenitors	3.07265	4.5478
0.000885979	-0.189614	0.124	0.161	0.958629	DS_vs_CTL	SoloTE-Charlie15a	0.00279556	FALSE	Astrocyte_progenitors	0.2954	0.422985
2.01531e-12	-0.189616	0.946	0.959	2.18056e-09	DS_vs_CTL	SoloTE-HAL1	2.56853e-11	FALSE	Astrocyte_progenitors	8.03312	12.9386
6.21517e-30	-0.189767	0.999	0.999	6.72481e-27	DS_vs_CTL	SoloTE-L2a	2.52491e-28	FALSE	Astrocyte_progenitors	33.4097	52.634
0.0204926	-0.190016	0.421	0.478	1	DS_vs_CTL	SoloTE-MSTB	0.0406104	FALSE	Astrocyte_progenitors	1.28095	1.72497
4.44686e-07	-0.192379	0.73	0.803	0.00048115	DS_vs_CTL	SoloTE-L1MB2	3.21162e-06	FALSE	Astrocyte_progenitors	3.88423	6.40301
0.000182923	-0.193191	0.696	0.762	0.197923	DS_vs_CTL	SoloTE-MLT1C	0.000711977	FALSE	Astrocyte_progenitors	2.75013	3.86929
1.3319e-26	-0.193429	0.999	0.996	1.44112e-23	DS_vs_CTL	SoloTE-L2c	4.80964e-25	FALSE	Astrocyte_progenitors	21.3678	34.3931
8.08301e-15	-0.193546	0.967	0.971	8.74582e-12	DS_vs_CTL	SoloTE-L1MC4	1.41999e-13	FALSE	Astrocyte_progenitors	9.46729	14.4133
0.772372	-0.194667	0.064	0.07	1	DS_vs_CTL	SoloTE-MLT1F2-int	0.800705	FALSE	Astrocyte_progenitors	0.244959	0.195277
1.04747e-13	-0.194804	0.903	0.954	1.13336e-10	DS_vs_CTL	SoloTE-L3	1.5474e-12	FALSE	Astrocyte_progenitors	6.94463	10.7018
0.00434715	-0.196939	0.469	0.537	1	DS_vs_CTL	SoloTE-Alu	0.0111014	FALSE	Astrocyte_progenitors	1.54565	1.56221
0.00834432	-0.197219	0.464	0.528	1	DS_vs_CTL	SoloTE-L1P4	0.0190309	FALSE	Astrocyte_progenitors	1.31775	1.7105
0.736481	-0.199145	0.049	0.054	1	DS_vs_CTL	SoloTE-LTR87	0.773084	FALSE	Astrocyte_progenitors	0.115064	0.163485
0.00336203	-0.199612	0.561	0.625	1	DS_vs_CTL	SoloTE-MLT1J	0.00881178	FALSE	Astrocyte_progenitors	1.78782	2.48318
6.50828e-11	-0.200708	0.961	0.974	7.04196e-08	DS_vs_CTL	SoloTE-L1M4	7.17014e-10	FALSE	Astrocyte_progenitors	9.19328	12.1381
0.000772932	-0.202232	0.366	0.438	0.836313	DS_vs_CTL	SoloTE-MLT1H	0.00249953	FALSE	Astrocyte_progenitors	0.980501	1.26372
0.0384106	-0.202298	0.222	0.264	1	DS_vs_CTL	SoloTE-MER101-int	0.0658757	FALSE	Astrocyte_progenitors	0.55279	0.702967
0.00181987	-0.20404	0.482	0.555	1	DS_vs_CTL	SoloTE-L1ME3D	0.00530381	FALSE	Astrocyte_progenitors	1.53217	2.15001
2.09012e-06	-0.206066	0.521	0.621	0.00226151	DS_vs_CTL	SoloTE-THE1D	1.34513e-05	FALSE	Astrocyte_progenitors	1.75155	2.6216
0.0577217	-0.206214	0.469	0.51	1	DS_vs_CTL	SoloTE-ERVL-E-int	0.0946741	FALSE	Astrocyte_progenitors	1.33461	1.59531
0.0829665	-0.206788	0.19	0.225	1	DS_vs_CTL	SoloTE-LTR8	0.129324	FALSE	Astrocyte_progenitors	0.389586	0.480632
0.313221	-0.207339	0.043	0.053	1	DS_vs_CTL	SoloTE-LTR12	0.381977	FALSE	Astrocyte_progenitors	0.087523	0.120542
0.10823	-0.207947	0.131	0.159	1	DS_vs_CTL	SoloTE-LTR40a	0.159161	FALSE	Astrocyte_progenitors	0.244894	0.350155
9.95436e-07	-0.208618	0.76	0.829	0.00107706	DS_vs_CTL	SoloTE-L1MB5	6.73993e-06	FALSE	Astrocyte_progenitors	4.05285	6.14001
0.000132933	-0.20864	0.749	0.807	0.143834	DS_vs_CTL	SoloTE-L1MCa	0.000543437	FALSE	Astrocyte_progenitors	3.33096	4.72708
2.36237e-29	-0.209542	0.999	0.997	2.55609e-26	DS_vs_CTL	SoloTE-MIRb	9.0326e-28	FALSE	Astrocyte_progenitors	24.669	35.1648
0.00159213	-0.20963	0.319	0.385	1	DS_vs_CTL	SoloTE-L1MEh	0.00479686	FALSE	Astrocyte_progenitors	0.710334	0.987472
7.71585e-05	-0.212045	0.107	0.146	0.0834854	DS_vs_CTL	SoloTE-Kanga2-a	0.000338872	FALSE	Astrocyte_progenitors	0.540453	0.606934
0.151277	-0.213407	0.302	0.339	1	DS_vs_CTL	SoloTE-MLT1F	0.207249	FALSE	Astrocyte_progenitors	0.846538	1.04629
2.33589e-07	-0.216004	0.658	0.761	0.000252744	DS_vs_CTL	SoloTE-MLT1A0	1.82932e-06	FALSE	Astrocyte_progenitors	2.26934	3.13748
0.500584	-0.216737	0.1	0.115	1	DS_vs_CTL	SoloTE-LTR85a	0.561	FALSE	Astrocyte_progenitors	0.133621	0.210596
3.39833e-21	-0.217529	0.979	0.982	3.67699e-18	DS_vs_CTL	SoloTE-L1ME1	1.05186e-19	FALSE	Astrocyte_progenitors	11.7908	18.7876
0.487235	-0.218299	0.053	0.064	1	DS_vs_CTL	SoloTE-HUERS-P1-int	0.549831	FALSE	Astrocyte_progenitors	0.114853	0.137755
5.27262e-07	-0.218456	0.598	0.7	0.000570497	DS_vs_CTL	SoloTE-L1ME2z	3.76616e-06	FALSE	Astrocyte_progenitors	2.72539	3.99764
0.00285843	-0.222409	0.137	0.177	1	DS_vs_CTL	SoloTE-MER63B	0.00770945	FALSE	Astrocyte_progenitors	0.207266	0.335563
0.146515	-0.222456	0.043	0.056	1	DS_vs_CTL	SoloTE-LTR85c	0.203059	FALSE	Astrocyte_progenitors	0.137277	0.208693
0.00744273	-0.222845	0.391	0.454	1	DS_vs_CTL	SoloTE-L1P2	0.0174021	FALSE	Astrocyte_progenitors	1.17955	1.35182
0.579356	-0.222854	0.044	0.053	1	DS_vs_CTL	SoloTE-LTR53	0.631848	FALSE	Astrocyte_progenitors	0.0967652	0.114767
4.59457e-08	-0.22297	0.814	0.858	4.97133e-05	DS_vs_CTL	SoloTE-L1PA10	4.03578e-07	FALSE	Astrocyte_progenitors	4.3745	6.41766
0.015871	-0.223408	0.209	0.254	1	DS_vs_CTL	SoloTE-MER39	0.032543	FALSE	Astrocyte_progenitors	0.686575	0.754608
0.0931918	-0.22361	0.225	0.263	1	DS_vs_CTL	SoloTE-MER21B	0.141861	FALSE	Astrocyte_progenitors	0.621872	0.961212
0.0122704	-0.223623	0.375	0.434	1	DS_vs_CTL	SoloTE-MSTD	0.0264204	FALSE	Astrocyte_progenitors	1.0024	1.59056
0.00228685	-0.226926	0.202	0.254	1	DS_vs_CTL	SoloTE-L4-B-Mam	0.00647537	FALSE	Astrocyte_progenitors	0.507091	0.708445
0.0155344	-0.227802	0.232	0.281	1	DS_vs_CTL	SoloTE-Charlie2a	0.0319537	FALSE	Astrocyte_progenitors	0.644352	0.788803
0.0417464	-0.233795	0.039	0.054	1	DS_vs_CTL	SoloTE-MER65C	0.0710345	FALSE	Astrocyte_progenitors	0.140182	0.187591
0.00182777	-0.234596	0.358	0.427	1	DS_vs_CTL	SoloTE-L4-A-Mam	0.00530381	FALSE	Astrocyte_progenitors	0.934108	1.36862
0.0281986	-0.235932	0.066	0.088	1	DS_vs_CTL	SoloTE-MER58D	0.0521415	FALSE	Astrocyte_progenitors	0.175188	0.197042
0.0161584	-0.238291	0.156	0.194	1	DS_vs_CTL	SoloTE-MLT2A2	0.0330282	FALSE	Astrocyte_progenitors	0.257904	0.35158
5.25242e-05	-0.238372	0.17	0.226	0.0568312	DS_vs_CTL	SoloTE-Charlie19a	0.000247397	FALSE	Astrocyte_progenitors	0.324952	0.435723
0.00186981	-0.243198	0.258	0.321	1	DS_vs_CTL	SoloTE-L1MCc	0.00540166	FALSE	Astrocyte_progenitors	0.705349	1.12822
1.27845e-15	-0.243743	0.943	0.962	1.38329e-12	DS_vs_CTL	SoloTE-L1MEc	2.4441e-14	FALSE	Astrocyte_progenitors	8.32909	12.9172
6.68802e-05	-0.244364	0.69	0.746	0.0723644	DS_vs_CTL	SoloTE-MER5B	0.00030189	FALSE	Astrocyte_progenitors	2.68071	3.76484
0.436234	-0.244983	0.054	0.065	1	DS_vs_CTL	SoloTE-MER41C	0.504924	FALSE	Astrocyte_progenitors	0.100471	0.136857
0.0276758	-0.246277	0.086	0.114	1	DS_vs_CTL	SoloTE-Charlie23a	0.0516933	FALSE	Astrocyte_progenitors	0.196796	0.270456
5.99068e-13	-0.246648	0.902	0.927	6.48191e-10	DS_vs_CTL	SoloTE-L1MEd	8.28498e-12	FALSE	Astrocyte_progenitors	6.59295	9.71909
0.0026573	-0.246964	0.308	0.375	1	DS_vs_CTL	SoloTE-Tigger13a	0.00725734	FALSE	Astrocyte_progenitors	0.923066	1.21468
1.44535e-09	-0.249338	0.918	0.953	1.56387e-06	DS_vs_CTL	SoloTE-AluYa5	1.44535e-08	FALSE	Astrocyte_progenitors	8.87736	9.16109
0.0507551	-0.249437	0.114	0.145	1	DS_vs_CTL	SoloTE-MER90a	0.0848093	FALSE	Astrocyte_progenitors	0.220353	0.279976
0.0816491	-0.250127	0.039	0.054	1	DS_vs_CTL	SoloTE-LTR10F	0.127884	FALSE	Astrocyte_progenitors	0.108797	0.145854
0.0522144	-0.252779	0.278	0.323	1	DS_vs_CTL	SoloTE-Harlequin-int	0.087024	FALSE	Astrocyte_progenitors	0.892636	0.819095
0.000153272	-0.252805	0.17	0.225	0.165841	DS_vs_CTL	SoloTE-Charlie18a	0.000607482	TRUE	Astrocyte_progenitors	0.390705	0.608364
0.334649	-0.254482	0.08	0.097	1	DS_vs_CTL	SoloTE-MER49	0.40266	FALSE	Astrocyte_progenitors	0.192686	0.218901
1.77389e-32	-0.257137	0.982	0.987	1.91935e-29	DS_vs_CTL	SoloTE-L2	9.6086e-31	TRUE	Astrocyte_progenitors	12.2359	20.428
0.00555827	-0.258309	0.138	0.177	1	DS_vs_CTL	SoloTE-MLT1G	0.0136335	TRUE	Astrocyte_progenitors	0.323835	0.474366
8.90975e-19	-0.259	0.943	0.972	9.64035e-16	DS_vs_CTL	SoloTE-MIR3	2.14494e-17	TRUE	Astrocyte_progenitors	7.97055	11.2343
8.44658e-08	-0.260181	0.65	0.742	9.1392e-05	DS_vs_CTL	SoloTE-L1MC2	7.13023e-07	TRUE	Astrocyte_progenitors	3.24506	4.94581
0.266066	-0.260617	0.063	0.08	1	DS_vs_CTL	SoloTE-HERVIP10F-int	0.333223	FALSE	Astrocyte_progenitors	0.104722	0.156402
0.491556	-0.261323	0.07	0.077	1	DS_vs_CTL	SoloTE-AluYi6-4d	0.552788	FALSE	Astrocyte_progenitors	0.177295	0.175146
0.000196348	-0.262218	0.222	0.286	0.212449	DS_vs_CTL	SoloTE-MLT1H2	0.000755186	TRUE	Astrocyte_progenitors	0.618722	0.848114
0.00108437	-0.263988	0.249	0.314	1	DS_vs_CTL	SoloTE-HSMAR2	0.00334046	TRUE	Astrocyte_progenitors	0.658448	0.979539
0.290422	-0.264522	0.106	0.125	1	DS_vs_CTL	SoloTE-MER67C	0.359571	FALSE	Astrocyte_progenitors	0.231153	0.272678
0.203167	-0.267541	0.105	0.128	1	DS_vs_CTL	SoloTE-MER34	0.266248	FALSE	Astrocyte_progenitors	0.258305	0.302567
0.535064	-0.268402	0.06	0.07	1	DS_vs_CTL	SoloTE-MER90	0.593526	FALSE	Astrocyte_progenitors	0.139703	0.188923
1.69933e-09	-0.268662	0.85	0.889	1.83867e-06	DS_vs_CTL	SoloTE-AluYb8	1.6486e-08	TRUE	Astrocyte_progenitors	6.15294	5.90894
0.10979	-0.268751	0.117	0.145	1	DS_vs_CTL	SoloTE-MER4B-int	0.160729	FALSE	Astrocyte_progenitors	0.29705	0.34966
1.11924e-07	-0.270344	0.643	0.737	0.000121102	DS_vs_CTL	SoloTE-L1PA17	9.09381e-07	TRUE	Astrocyte_progenitors	2.46421	3.77998
2.25643e-18	-0.270642	0.914	0.944	2.44146e-15	DS_vs_CTL	SoloTE-L1ME4a	5.23814e-17	TRUE	Astrocyte_progenitors	7.29982	10.4188
0.214455	-0.27224	0.105	0.128	1	DS_vs_CTL	SoloTE-MER113A	0.278791	FALSE	Astrocyte_progenitors	0.20873	0.306524
0.289801	-0.275833	0.08	0.09	1	DS_vs_CTL	SoloTE-Charlie7a	0.359486	FALSE	Astrocyte_progenitors	0.172388	0.254745
9.8505e-11	-0.275927	0.682	0.795	1.06582e-07	DS_vs_CTL	SoloTE-L1PA11	1.06714e-09	TRUE	Astrocyte_progenitors	3.03043	5.26764
0.123616	-0.277136	0.111	0.138	1	DS_vs_CTL	SoloTE-Zaphod	0.175982	FALSE	Astrocyte_progenitors	0.285329	0.342767
1.98356e-05	-0.277231	0.068	0.1	0.0214621	DS_vs_CTL	SoloTE-MER6	0.000103977	TRUE	Astrocyte_progenitors	0.161998	0.260757
2.44722e-06	-0.277526	0.359	0.459	0.00264789	DS_vs_CTL	SoloTE-L3b	1.5595e-05	TRUE	Astrocyte_progenitors	1.1513	1.77614
0.126218	-0.277618	0.087	0.111	1	DS_vs_CTL	SoloTE-LTR82A	0.178741	FALSE	Astrocyte_progenitors	0.201509	0.253021
0.30758	-0.279968	0.056	0.07	1	DS_vs_CTL	SoloTE-LTR82B	0.37651	FALSE	Astrocyte_progenitors	0.103677	0.163543
0.00293575	-0.281426	0.118	0.16	1	DS_vs_CTL	SoloTE-Charlie10	0.00785283	TRUE	Astrocyte_progenitors	0.280648	0.347233
3.61294e-13	-0.28156	0.838	0.897	3.9092e-10	DS_vs_CTL	SoloTE-L1MEf	5.2187e-12	TRUE	Astrocyte_progenitors	4.73008	6.94582
3.60352e-20	-0.281593	0.888	0.943	3.89901e-17	DS_vs_CTL	SoloTE-L1MB3	9.75952e-19	TRUE	Astrocyte_progenitors	6.85782	11.7936
0.00408513	-0.283927	0.056	0.081	1	DS_vs_CTL	SoloTE-MERX	0.010579	TRUE	Astrocyte_progenitors	0.0693595	0.0896596
0.585542	-0.284394	0.051	0.06	1	DS_vs_CTL	SoloTE-MER51-int	0.636458	FALSE	Astrocyte_progenitors	0.0969571	0.117809
0.162954	-0.286503	0.045	0.059	1	DS_vs_CTL	SoloTE-Arthur1C	0.219751	FALSE	Astrocyte_progenitors	0.104153	0.137347
6.64623e-07	-0.287763	0.67	0.739	0.000719122	DS_vs_CTL	SoloTE-L1PB4	4.64521e-06	TRUE	Astrocyte_progenitors	2.55988	3.90718
9.72467e-08	-0.287803	0.305	0.407	0.000105221	DS_vs_CTL	SoloTE-L1MA10	8.10389e-07	TRUE	Astrocyte_progenitors	0.981322	1.69512
0.0260988	-0.288177	0.041	0.058	1	DS_vs_CTL	SoloTE-CR1-3-Croc	0.0496029	TRUE	Astrocyte_progenitors	0.0881825	0.175142
0.618556	-0.291381	0.048	0.057	1	DS_vs_CTL	SoloTE-MamRep1527	0.664564	FALSE	Astrocyte_progenitors	0.071153	0.0970086
6.52363e-13	-0.29212	0.829	0.897	7.05857e-10	DS_vs_CTL	SoloTE-L1PA8	8.83408e-12	TRUE	Astrocyte_progenitors	4.53595	7.5676
0.00033567	-0.29274	0.33	0.408	0.363195	DS_vs_CTL	SoloTE-Charlie4z	0.00121214	TRUE	Astrocyte_progenitors	1.12456	1.42487
0.335137	-0.294727	0.055	0.069	1	DS_vs_CTL	SoloTE-MER45C	0.40266	FALSE	Astrocyte_progenitors	0.0928149	0.119265
0.0822529	-0.29474	0.129	0.161	1	DS_vs_CTL	SoloTE-MLT2A1	0.12852	FALSE	Astrocyte_progenitors	0.295192	0.398634
4.30135e-15	-0.295001	0.79	0.892	4.65406e-12	DS_vs_CTL	SoloTE-MER5A	7.76632e-14	TRUE	Astrocyte_progenitors	4.21348	5.77595
0.0291199	-0.295015	0.079	0.105	1	DS_vs_CTL	SoloTE-Tigger14a	0.0534688	FALSE	Astrocyte_progenitors	0.134869	0.185495
0.0015578	-0.295651	0.199	0.254	1	DS_vs_CTL	SoloTE-LTR16C	0.00473163	TRUE	Astrocyte_progenitors	0.383912	0.628033
4.86205e-20	-0.296182	0.874	0.933	5.26074e-17	DS_vs_CTL	SoloTE-L1MC1	1.26413e-18	TRUE	Astrocyte_progenitors	6.15815	10.972
0.00010586	-0.296419	0.277	0.354	0.114541	DS_vs_CTL	SoloTE-MSTB1	0.000449733	TRUE	Astrocyte_progenitors	0.705828	0.998308
6.60155e-31	-0.297925	0.971	0.982	7.14288e-28	DS_vs_CTL	SoloTE-MIRc	3.06501e-29	TRUE	Astrocyte_progenitors	10.9274	15.4738
0.0711589	-0.298486	0.084	0.11	1	DS_vs_CTL	SoloTE-LTR49	0.112813	FALSE	Astrocyte_progenitors	0.21008	0.263053
0.0371448	-0.300248	0.11	0.143	1	DS_vs_CTL	SoloTE-L1MEg1	0.0642131	FALSE	Astrocyte_progenitors	0.272554	0.395289
0.00680988	-0.300332	0.097	0.131	1	DS_vs_CTL	SoloTE-L1M3e	0.0160595	TRUE	Astrocyte_progenitors	0.222306	0.287384
0.0937514	-0.300334	0.171	0.204	1	DS_vs_CTL	SoloTE-MER46C	0.14238	FALSE	Astrocyte_progenitors	0.380881	0.596985
0.0552109	-0.301559	0.173	0.212	1	DS_vs_CTL	SoloTE-LTR78	0.091084	FALSE	Astrocyte_progenitors	0.302114	0.49403
0.0408297	-0.301992	0.092	0.12	1	DS_vs_CTL	SoloTE-MER51A	0.0696569	FALSE	Astrocyte_progenitors	0.252428	0.316456
0.00412092	-0.302113	0.312	0.375	1	DS_vs_CTL	SoloTE-MER1B	0.0106294	TRUE	Astrocyte_progenitors	0.802481	1.1956
0.0271696	-0.30225	0.184	0.228	1	DS_vs_CTL	SoloTE-MLT1J1	0.0510169	FALSE	Astrocyte_progenitors	0.332393	0.518483
0.0489574	-0.302307	0.064	0.087	1	DS_vs_CTL	SoloTE-Ricksha-c	0.0822281	FALSE	Astrocyte_progenitors	0.138705	0.213927
0.00108228	-0.302796	0.304	0.376	1	DS_vs_CTL	SoloTE-MER113	0.00334046	TRUE	Astrocyte_progenitors	0.743866	0.984617
0.351667	-0.303511	0.06	0.075	1	DS_vs_CTL	SoloTE-MER57E3	0.420965	FALSE	Astrocyte_progenitors	0.228659	0.232758
1.97672e-11	-0.304908	0.734	0.823	2.13881e-08	DS_vs_CTL	SoloTE-L1MA8	2.25415e-10	TRUE	Astrocyte_progenitors	3.4235	5.23831
0.153133	-0.308215	0.049	0.067	1	DS_vs_CTL	SoloTE-Tigger12c	0.208672	FALSE	Astrocyte_progenitors	0.0977909	0.158763
0.0146902	-0.309103	0.316	0.362	1	DS_vs_CTL	SoloTE-L1M8	0.0306045	TRUE	Astrocyte_progenitors	0.790072	1.18881
0.000622189	-0.310334	0.298	0.372	0.673209	DS_vs_CTL	SoloTE-LTR33	0.00210637	TRUE	Astrocyte_progenitors	0.646744	0.952004
7.37961e-06	-0.311167	0.126	0.18	0.00798474	DS_vs_CTL	SoloTE-MER117	4.36068e-05	TRUE	Astrocyte_progenitors	0.369235	0.562102
6.29331e-10	-0.312138	0.605	0.726	6.80936e-07	DS_vs_CTL	SoloTE-MER20	6.59782e-09	TRUE	Astrocyte_progenitors	2.66442	3.96409
3.44817e-14	-0.312559	0.807	0.859	3.73093e-11	DS_vs_CTL	SoloTE-L1PREC2	5.21236e-13	TRUE	Astrocyte_progenitors	3.67077	5.50929
0.285384	-0.313925	0.044	0.057	1	DS_vs_CTL	SoloTE-MamTip1	0.354684	FALSE	Astrocyte_progenitors	0.112581	0.102014
0.0200993	-0.31517	0.235	0.279	1	DS_vs_CTL	SoloTE-LTR7	0.0399528	TRUE	Astrocyte_progenitors	0.465021	0.501958
2.84775e-05	-0.315491	0.237	0.315	0.0308126	DS_vs_CTL	SoloTE-MLT1J2	0.000144612	TRUE	Astrocyte_progenitors	0.836692	1.01948
0.000141449	-0.316604	0.487	0.559	0.153048	DS_vs_CTL	SoloTE-MLT1L	0.000567544	TRUE	Astrocyte_progenitors	1.38147	1.86136
0.0230044	-0.319953	0.119	0.154	1	DS_vs_CTL	SoloTE-MER65A	0.0449036	TRUE	Astrocyte_progenitors	0.255766	0.306735
0.465292	-0.320125	0.04	0.051	1	DS_vs_CTL	SoloTE-LTR84a	0.527818	FALSE	Astrocyte_progenitors	0.0699182	0.120569
0.000306467	-0.322592	0.216	0.283	0.331598	DS_vs_CTL	SoloTE-THE1A	0.00111912	TRUE	Astrocyte_progenitors	0.555047	0.84153
0.00029472	-0.326093	0.182	0.243	0.318887	DS_vs_CTL	SoloTE-MER94	0.00108846	TRUE	Astrocyte_progenitors	0.416766	0.64379
0.368659	-0.329947	0.064	0.079	1	DS_vs_CTL	SoloTE-Helitron3Na-Mam	0.437277	FALSE	Astrocyte_progenitors	0.199157	0.274005
0.160203	-0.329998	0.114	0.14	1	DS_vs_CTL	SoloTE-MamRep137	0.216491	FALSE	Astrocyte_progenitors	0.253383	0.382827
0.000300109	-0.330393	0.456	0.517	0.324718	DS_vs_CTL	SoloTE-THE1C	0.0011021	TRUE	Astrocyte_progenitors	1.17959	1.8031
2.33756e-18	-0.331036	0.827	0.9	2.52924e-15	DS_vs_CTL	SoloTE-L1MA3	5.23937e-17	TRUE	Astrocyte_progenitors	4.77854	8.09659
1.08799e-07	-0.332153	0.38	0.495	0.00011772	DS_vs_CTL	SoloTE-MIR1-Amn	8.95178e-07	TRUE	Astrocyte_progenitors	1.00296	1.42615
1.5058e-15	-0.332203	0.767	0.835	1.62928e-12	DS_vs_CTL	SoloTE-L1MA2	2.79649e-14	TRUE	Astrocyte_progenitors	3.56858	6.48243
0.000519838	-0.337311	0.419	0.49	0.562465	DS_vs_CTL	SoloTE-MLT1I	0.0017878	TRUE	Astrocyte_progenitors	1.05931	1.53366
0.0303414	-0.338596	0.081	0.108	1	DS_vs_CTL	SoloTE-MSTD-int	0.0547831	FALSE	Astrocyte_progenitors	0.153046	0.218853
0.00233782	-0.338918	0.087	0.125	1	DS_vs_CTL	SoloTE-AmnSINE1	0.00652181	TRUE	Astrocyte_progenitors	0.192393	0.316409
2.94671e-08	-0.339543	0.268	0.373	3.18834e-05	DS_vs_CTL	SoloTE-Tigger15a	2.62379e-07	TRUE	Astrocyte_progenitors	0.713755	1.13713
1.58782e-08	-0.341091	0.419	0.541	1.71802e-05	DS_vs_CTL	SoloTE-L1PA8A	1.43345e-07	TRUE	Astrocyte_progenitors	1.31199	2.36171
0.198046	-0.341616	0.096	0.117	1	DS_vs_CTL	SoloTE-MADE2	0.260061	FALSE	Astrocyte_progenitors	0.230002	0.286424
0.000827836	-0.342069	0.272	0.343	0.895719	DS_vs_CTL	SoloTE-L1M4a2	0.00262573	TRUE	Astrocyte_progenitors	0.668815	1.24614
3.26593e-05	-0.342283	0.208	0.284	0.0353373	DS_vs_CTL	SoloTE-MLT2B4	0.00016017	TRUE	Astrocyte_progenitors	0.640626	0.834738
0.00850211	-0.34294	0.154	0.201	1	DS_vs_CTL	SoloTE-LTR79	0.019323	TRUE	Astrocyte_progenitors	0.280158	0.390995
0.000135	-0.343248	0.191	0.255	0.14607	DS_vs_CTL	SoloTE-MER58C	0.000548437	TRUE	Astrocyte_progenitors	0.601992	0.802932
0.149159	-0.343687	0.112	0.134	1	DS_vs_CTL	SoloTE-LTR37B	0.20541	FALSE	Astrocyte_progenitors	0.20655	0.241694
0.0463069	-0.35037	0.048	0.067	1	DS_vs_CTL	SoloTE-Charlie17a	0.0781805	FALSE	Astrocyte_progenitors	0.0951402	0.159792
0.0176694	-0.352581	0.191	0.234	1	DS_vs_CTL	SoloTE-MLT1G1	0.0358454	TRUE	Astrocyte_progenitors	0.402869	0.557423
0.10624	-0.355172	0.108	0.136	1	DS_vs_CTL	SoloTE-MLT1E3	0.156946	FALSE	Astrocyte_progenitors	0.182224	0.28131
0.176139	-0.355206	0.076	0.09	1	DS_vs_CTL	SoloTE-LTR10C	0.235092	FALSE	Astrocyte_progenitors	0.196611	0.254102
0.00180143	-0.356755	0.137	0.185	1	DS_vs_CTL	SoloTE-BLACKJACK	0.00529832	TRUE	Astrocyte_progenitors	0.319657	0.455314
0.0206067	-0.357251	0.121	0.16	1	DS_vs_CTL	SoloTE-L1M3f	0.0407122	TRUE	Astrocyte_progenitors	0.211827	0.346428
0.452257	-0.358014	0.042	0.053	1	DS_vs_CTL	SoloTE-LTR2C	0.516638	FALSE	Astrocyte_progenitors	0.0628761	0.065023
0.156208	-0.360412	0.095	0.113	1	DS_vs_CTL	SoloTE-MER57A1	0.211974	FALSE	Astrocyte_progenitors	0.191186	0.249068
1.09583e-17	-0.362437	0.83	0.882	1.18569e-14	DS_vs_CTL	SoloTE-L1MA9	2.3743e-16	TRUE	Astrocyte_progenitors	4.53445	7.48945
1.84882e-11	-0.364205	0.683	0.777	2.00043e-08	DS_vs_CTL	SoloTE-L1MA7	2.14596e-10	TRUE	Astrocyte_progenitors	2.58821	4.09368
0.100918	-0.364599	0.117	0.146	1	DS_vs_CTL	SoloTE-Arthur1	0.150106	FALSE	Astrocyte_progenitors	0.283925	0.370184
6.73999e-10	-0.364718	0.496	0.621	7.29267e-07	DS_vs_CTL	SoloTE-L1MA1	6.95395e-09	TRUE	Astrocyte_progenitors	1.43	2.91038
0.0118078	-0.364948	0.208	0.259	1	DS_vs_CTL	SoloTE-MLT1O	0.0257554	TRUE	Astrocyte_progenitors	0.425957	0.633927
0.0951616	-0.366275	0.113	0.143	1	DS_vs_CTL	SoloTE-MER96B	0.144184	FALSE	Astrocyte_progenitors	0.227106	0.293227
0.000630944	-0.372091	0.207	0.273	0.682682	DS_vs_CTL	SoloTE-ERVL-B4-int	0.00212494	TRUE	Astrocyte_progenitors	0.47454	0.64158
0.000958317	-0.373734	0.092	0.133	1	DS_vs_CTL	SoloTE-L1M3a	0.00299474	TRUE	Astrocyte_progenitors	0.256697	0.338376
9.93319e-15	-0.37384	0.696	0.816	1.07477e-11	DS_vs_CTL	SoloTE-THE1B	1.65553e-13	TRUE	Astrocyte_progenitors	3.99338	5.15998
1.88791e-05	-0.375113	0.136	0.198	0.0204272	DS_vs_CTL	SoloTE-MLT1M	9.97677e-05	TRUE	Astrocyte_progenitors	0.423209	0.714126
0.0469667	-0.375326	0.138	0.174	1	DS_vs_CTL	SoloTE-MER81	0.079089	FALSE	Astrocyte_progenitors	0.677318	0.739243
0.0124026	-0.376484	0.034	0.053	1	DS_vs_CTL	SoloTE-X7A-LINE	0.0266063	TRUE	Astrocyte_progenitors	0.0830171	0.106505
0.229211	-0.376665	0.065	0.081	1	DS_vs_CTL	SoloTE-LTR104-Mam	0.293282	FALSE	Astrocyte_progenitors	0.134575	0.206351
1.16621e-17	-0.377538	0.792	0.876	1.26184e-14	DS_vs_CTL	SoloTE-L1M2	2.44527e-16	TRUE	Astrocyte_progenitors	3.92321	5.39488
0.410484	-0.380708	0.042	0.054	1	DS_vs_CTL	SoloTE-Charlie17b	0.477307	FALSE	Astrocyte_progenitors	0.059632	0.0792467
1.98281e-06	-0.381362	0.455	0.547	0.0021454	DS_vs_CTL	SoloTE-L1PB2	1.30185e-05	TRUE	Astrocyte_progenitors	1.41635	1.8564
5.98984e-39	-0.381741	0.96	0.978	6.481e-36	DS_vs_CTL	SoloTE-L1PA7	4.32599e-37	TRUE	Astrocyte_progenitors	10.1212	17.6726
0.01328	-0.381869	0.084	0.116	1	DS_vs_CTL	SoloTE-MER6A	0.0281172	TRUE	Astrocyte_progenitors	0.175851	0.304564
0.190986	-0.382064	0.047	0.064	1	DS_vs_CTL	SoloTE-MamGypLTR1c	0.252093	FALSE	Astrocyte_progenitors	0.0828548	0.111926
0.012503	-0.383442	0.166	0.213	1	DS_vs_CTL	SoloTE-MER74A	0.0267334	TRUE	Astrocyte_progenitors	0.464549	0.683625
1.52357e-16	-0.384258	0.737	0.835	1.6485e-13	DS_vs_CTL	SoloTE-L1PA15	3.00097e-15	TRUE	Astrocyte_progenitors	3.18701	5.39745
0.186502	-0.385619	0.082	0.102	1	DS_vs_CTL	SoloTE-LTR16	0.246896	FALSE	Astrocyte_progenitors	0.113488	0.187228
1.03136e-08	-0.390501	0.552	0.654	1.11594e-05	DS_vs_CTL	SoloTE-MLT1K	9.44206e-08	TRUE	Astrocyte_progenitors	1.64315	2.38836
0.330913	-0.391258	0.046	0.059	1	DS_vs_CTL	SoloTE-ERV24B-Prim-int	0.39906	FALSE	Astrocyte_progenitors	0.0941614	0.104236
0.148585	-0.392683	0.087	0.11	1	DS_vs_CTL	SoloTE-MER57-int	0.205053	FALSE	Astrocyte_progenitors	0.12584	0.206683
0.180818	-0.393829	0.081	0.1	1	DS_vs_CTL	SoloTE-Charlie21a	0.239861	FALSE	Astrocyte_progenitors	0.218371	0.280452
0.0910029	-0.394515	0.071	0.095	1	DS_vs_CTL	SoloTE-LTR56	0.139839	FALSE	Astrocyte_progenitors	0.161931	0.198343
2.51512e-07	-0.396624	0.36	0.471	0.000272136	DS_vs_CTL	SoloTE-MLT1F2	1.92333e-06	TRUE	Astrocyte_progenitors	0.975904	1.2535
0.00171805	-0.39701	0.116	0.162	1	DS_vs_CTL	SoloTE-AluYa8	0.00509923	TRUE	Astrocyte_progenitors	0.482543	0.430323
0.000729916	-0.397955	0.203	0.269	0.789769	DS_vs_CTL	SoloTE-L1P4a	0.00237223	TRUE	Astrocyte_progenitors	0.331389	0.37551
0.0869342	-0.400003	0.081	0.107	1	DS_vs_CTL	SoloTE-MSTB-int	0.134541	FALSE	Astrocyte_progenitors	0.182822	0.268606
0.00293389	-0.402947	0.168	0.223	1	DS_vs_CTL	SoloTE-L2-3-Crp	0.00785283	TRUE	Astrocyte_progenitors	0.367605	0.631421
0.127496	-0.404756	0.05	0.069	1	DS_vs_CTL	SoloTE-LTR16B2	0.179787	FALSE	Astrocyte_progenitors	0.108042	0.139605
0.0919553	-0.404774	0.081	0.107	1	DS_vs_CTL	SoloTE-LTR16A2	0.140969	FALSE	Astrocyte_progenitors	0.0994855	0.135562
1.4486e-11	-0.405424	0.5	0.64	1.56739e-08	DS_vs_CTL	SoloTE-MER5A1	1.74369e-10	TRUE	Astrocyte_progenitors	1.73886	2.56971
0.0377258	-0.405585	0.082	0.112	1	DS_vs_CTL	SoloTE-MER74B	0.0648725	FALSE	Astrocyte_progenitors	0.12656	0.194948
0.12751	-0.406273	0.038	0.054	1	DS_vs_CTL	SoloTE-LTR32	0.179787	FALSE	Astrocyte_progenitors	0.0841038	0.118625
0.093127	-0.407627	0.081	0.107	1	DS_vs_CTL	SoloTE-Tigger9a	0.141861	FALSE	Astrocyte_progenitors	0.16444	0.213358
2.36139e-30	-0.408507	0.868	0.934	2.55503e-27	DS_vs_CTL	SoloTE-L1PA6	1.02327e-28	TRUE	Astrocyte_progenitors	5.3977	9.12062
8.87638e-22	-0.408897	0.795	0.882	9.60424e-19	DS_vs_CTL	SoloTE-L1PA13	3.03666e-20	TRUE	Astrocyte_progenitors	3.74156	5.91492
7.35027e-07	-0.411426	0.371	0.479	0.000795299	DS_vs_CTL	SoloTE-L1M6	5.08263e-06	TRUE	Astrocyte_progenitors	1.07546	1.69337
0.0547791	-0.41203	0.058	0.083	1	DS_vs_CTL	SoloTE-L2-1-AMi	0.0906015	FALSE	Astrocyte_progenitors	0.13656	0.30575
0.000113401	-0.412191	0.205	0.278	0.1227	DS_vs_CTL	SoloTE-MLT1N2	0.00047864	TRUE	Astrocyte_progenitors	0.531885	0.721087
4.17375e-11	-0.413226	0.531	0.664	4.516e-08	DS_vs_CTL	SoloTE-L1PA14	4.67748e-10	TRUE	Astrocyte_progenitors	1.86671	3.1732
4.33541e-31	-0.413958	0.935	0.954	4.69092e-28	DS_vs_CTL	SoloTE-L1PB1	2.16771e-29	TRUE	Astrocyte_progenitors	6.4654	9.56617
2.55626e-17	-0.416227	0.513	0.686	2.76587e-14	DS_vs_CTL	SoloTE-L1MA6	5.19241e-16	TRUE	Astrocyte_progenitors	1.75047	3.17345
0.0147699	-0.417156	0.061	0.089	1	DS_vs_CTL	SoloTE-LTR12F	0.0306724	TRUE	Astrocyte_progenitors	0.182114	0.226478
2.81853e-06	-0.417371	0.311	0.41	0.00304964	DS_vs_CTL	SoloTE-HAL1M8	1.76158e-05	TRUE	Astrocyte_progenitors	0.901785	1.42368
0.112318	-0.417943	0.048	0.067	1	DS_vs_CTL	SoloTE-MER57B2	0.16406	FALSE	Astrocyte_progenitors	0.110733	0.149045
0.0295113	-0.420652	0.06	0.086	1	DS_vs_CTL	SoloTE-LTR16E1	0.053732	FALSE	Astrocyte_progenitors	0.0788575	0.122219
0.180168	-0.422847	0.057	0.076	1	DS_vs_CTL	SoloTE-MER89-int	0.239487	FALSE	Astrocyte_progenitors	0.137001	0.162691
1.62283e-11	-0.42456	0.551	0.677	1.7559e-08	DS_vs_CTL	SoloTE-L1M4c	1.91789e-10	TRUE	Astrocyte_progenitors	2.1272	2.88871
4.66177e-12	-0.424788	0.517	0.648	5.04403e-09	DS_vs_CTL	SoloTE-L1MA5	5.82721e-11	TRUE	Astrocyte_progenitors	1.71533	3.0412
3.23643e-05	-0.425196	0.162	0.231	0.0350182	DS_vs_CTL	SoloTE-Tigger19a	0.00016017	TRUE	Astrocyte_progenitors	0.446773	0.699575
5.0038e-05	-0.425233	0.205	0.281	0.0541411	DS_vs_CTL	SoloTE-MSTC	0.000237407	TRUE	Astrocyte_progenitors	0.417901	0.673413
0.245463	-0.426778	0.038	0.052	1	DS_vs_CTL	SoloTE-MER34A1	0.311204	FALSE	Astrocyte_progenitors	0.0893393	0.123363
0.0868068	-0.427322	0.088	0.113	1	DS_vs_CTL	SoloTE-HERVK13-int	0.134541	FALSE	Astrocyte_progenitors	0.0866779	0.0786412
0.0126935	-0.428031	0.092	0.13	1	DS_vs_CTL	SoloTE-LTR25-int	0.0270517	TRUE	Astrocyte_progenitors	0.296143	0.314374
0.00435993	-0.428475	0.176	0.228	1	DS_vs_CTL	SoloTE-HERVL-int	0.0111014	TRUE	Astrocyte_progenitors	0.355042	0.560046
0.0320372	-0.43002	0.112	0.147	1	DS_vs_CTL	SoloTE-HERV17-int	0.0567417	FALSE	Astrocyte_progenitors	0.243114	0.375493
2.76686e-20	-0.440308	0.729	0.828	2.99374e-17	DS_vs_CTL	SoloTE-L1MA4A	7.81937e-19	TRUE	Astrocyte_progenitors	2.6354	4.78142
0.000245526	-0.440599	0.132	0.192	0.265659	DS_vs_CTL	SoloTE-LTR67B	0.000917195	TRUE	Astrocyte_progenitors	0.266108	0.3397
0.000136117	-0.442135	0.201	0.274	0.147279	DS_vs_CTL	SoloTE-MER102c	0.000549541	TRUE	Astrocyte_progenitors	0.450741	0.661238
0.0293343	-0.447791	0.12	0.157	1	DS_vs_CTL	SoloTE-LTR78B	0.0535598	FALSE	Astrocyte_progenitors	0.27988	0.398482
0.000607556	-0.447842	0.194	0.26	0.657376	DS_vs_CTL	SoloTE-L1MCb	0.00207848	TRUE	Astrocyte_progenitors	0.425126	0.558034
0.0177021	-0.448152	0.105	0.143	1	DS_vs_CTL	SoloTE-MER115	0.0358454	TRUE	Astrocyte_progenitors	0.178161	0.285257
0.0247572	-0.449074	0.118	0.155	1	DS_vs_CTL	SoloTE-MLT2B3	0.0477513	TRUE	Astrocyte_progenitors	0.194258	0.293121
8.01856e-09	-0.449378	0.364	0.487	8.67608e-06	DS_vs_CTL	SoloTE-HAL1b	7.4458e-08	TRUE	Astrocyte_progenitors	0.932221	1.37387
0.0644031	-0.450454	0.094	0.114	1	DS_vs_CTL	SoloTE-MER52A	0.103619	FALSE	Astrocyte_progenitors	0.136707	0.20353
1.82587e-14	-0.451158	0.606	0.732	1.97559e-11	DS_vs_CTL	SoloTE-MLT1B	2.96703e-13	TRUE	Astrocyte_progenitors	2.14598	3.08708
5.66128e-06	-0.451894	0.347	0.424	0.0061255	DS_vs_CTL	SoloTE-LTR7B	3.4391e-05	TRUE	Astrocyte_progenitors	0.816722	0.798842
0.118561	-0.453569	0.058	0.079	1	DS_vs_CTL	SoloTE-Zaphod3	0.170875	FALSE	Astrocyte_progenitors	0.137711	0.187252
0.00165013	-0.456978	0.102	0.148	1	DS_vs_CTL	SoloTE-MER63A	0.00494279	TRUE	Astrocyte_progenitors	0.242636	0.365156
0.0353283	-0.458325	0.086	0.118	1	DS_vs_CTL	SoloTE-ORSL	0.0613994	FALSE	Astrocyte_progenitors	0.209373	0.229743
0.0740526	-0.462271	0.039	0.056	1	DS_vs_CTL	SoloTE-MER6B	0.116548	FALSE	Astrocyte_progenitors	0.109827	0.154654
0.00226036	-0.463541	0.051	0.081	1	DS_vs_CTL	SoloTE-X7B-LINE	0.00644401	TRUE	Astrocyte_progenitors	0.087232	0.119527
0.275842	-0.465626	0.036	0.05	1	DS_vs_CTL	SoloTE-MLT1E	0.344802	FALSE	Astrocyte_progenitors	0.060627	0.099309
2.24175e-07	-0.465741	0.263	0.367	0.000242557	DS_vs_CTL	SoloTE-MLT1G3	1.777e-06	TRUE	Astrocyte_progenitors	0.749706	0.876738
0.304129	-0.466357	0.039	0.05	1	DS_vs_CTL	SoloTE-LTR61	0.372988	FALSE	Astrocyte_progenitors	0.107909	0.108054
0.000175461	-0.466635	0.188	0.258	0.189849	DS_vs_CTL	SoloTE-MamRep605	0.000691211	TRUE	Astrocyte_progenitors	0.449045	0.703375
5.44181e-13	-0.466787	0.359	0.512	5.88804e-10	DS_vs_CTL	SoloTE-L1ME3E	7.68952e-12	TRUE	Astrocyte_progenitors	1.26895	1.95196
2.49225e-07	-0.467061	0.229	0.33	0.000269661	DS_vs_CTL	SoloTE-HERV4-I-int	1.92333e-06	TRUE	Astrocyte_progenitors	0.311635	0.348292
0.00920702	-0.470233	0.047	0.072	1	DS_vs_CTL	SoloTE-L1M3d	0.0207078	TRUE	Astrocyte_progenitors	0.0952977	0.125099
0.0305885	-0.47172	0.065	0.094	1	DS_vs_CTL	SoloTE-Charlie22a	0.0550762	FALSE	Astrocyte_progenitors	0.163366	0.225876
0.00255855	-0.474056	0.199	0.251	1	DS_vs_CTL	SoloTE-HERVK-int	0.00704684	TRUE	Astrocyte_progenitors	0.358767	0.499296
0.0596731	-0.475039	0.057	0.082	1	DS_vs_CTL	SoloTE-LTR29	0.0974561	FALSE	Astrocyte_progenitors	0.0828981	0.113224
0.057824	-0.477204	0.061	0.086	1	DS_vs_CTL	SoloTE-LTR33A-	0.0946741	FALSE	Astrocyte_progenitors	0.184341	0.234935
0.116618	-0.480787	0.04	0.058	1	DS_vs_CTL	SoloTE-MER47B	0.168824	FALSE	Astrocyte_progenitors	0.0806895	0.127001
4.02443e-07	-0.481801	0.305	0.409	0.000435443	DS_vs_CTL	SoloTE-L1ME3C	2.9713e-06	TRUE	Astrocyte_progenitors	0.846141	1.26554
0.0221643	-0.482938	0.094	0.13	1	DS_vs_CTL	SoloTE-MER106A	0.0435251	TRUE	Astrocyte_progenitors	0.208964	0.324309
1.39164e-19	-0.483557	0.707	0.821	1.50575e-16	DS_vs_CTL	SoloTE-MSTA	3.47909e-18	TRUE	Astrocyte_progenitors	2.80255	3.88109
7.47987e-05	-0.485664	0.214	0.29	0.0809322	DS_vs_CTL	SoloTE-MER102a	0.000330743	TRUE	Astrocyte_progenitors	0.512208	0.67635
0.151451	-0.485712	0.039	0.056	1	DS_vs_CTL	SoloTE-LTR6B	0.207249	FALSE	Astrocyte_progenitors	0.075177	0.0883647
0.119269	-0.487209	0.062	0.084	1	DS_vs_CTL	SoloTE-HUERS-P3b-int	0.171515	FALSE	Astrocyte_progenitors	0.0995962	0.25232
0.00070553	-0.488506	0.119	0.172	0.763383	DS_vs_CTL	SoloTE-MER8	0.00231613	TRUE	Astrocyte_progenitors	0.404946	0.532465
1.31011e-34	-0.490472	0.841	0.899	1.41754e-31	DS_vs_CTL	SoloTE-L1MA4	7.74157e-33	TRUE	Astrocyte_progenitors	4.20235	7.51484
0.077443	-0.491686	0.043	0.064	1	DS_vs_CTL	SoloTE-HERVK3-int	0.121589	FALSE	Astrocyte_progenitors	0.0905157	0.154953
0.0610035	-0.494694	0.044	0.065	1	DS_vs_CTL	SoloTE-LTR24C	0.0993791	FALSE	Astrocyte_progenitors	0.125958	0.135494
6.74272e-06	-0.495559	0.153	0.227	0.00729563	DS_vs_CTL	SoloTE-MLT1H1	4.05812e-05	TRUE	Astrocyte_progenitors	0.392763	0.511931
0.030864	-0.495704	0.065	0.094	1	DS_vs_CTL	SoloTE-HERVL40-int	0.0554187	FALSE	Astrocyte_progenitors	0.153594	0.227823
0.0267228	-0.497865	0.051	0.076	1	DS_vs_CTL	SoloTE-MER92B	0.0504937	FALSE	Astrocyte_progenitors	0.124766	0.173202
0.000417484	-0.503641	0.159	0.223	0.451718	DS_vs_CTL	SoloTE-MLT1F1	0.00146684	TRUE	Astrocyte_progenitors	0.362985	0.471122
3.54422e-09	-0.509916	0.389	0.51	3.83485e-06	DS_vs_CTL	SoloTE-L1M7	3.38786e-08	TRUE	Astrocyte_progenitors	0.8512	1.28121
0.102154	-0.511834	0.048	0.056	1	DS_vs_CTL	SoloTE-MER50B	0.151599	FALSE	Astrocyte_progenitors	0.0789434	0.102475
0.00548922	-0.511937	0.046	0.074	1	DS_vs_CTL	SoloTE-LTR41B	0.0135151	TRUE	Astrocyte_progenitors	0.125265	0.168519
0.108989	-0.515945	0.048	0.068	1	DS_vs_CTL	SoloTE-MER105	0.159916	FALSE	Astrocyte_progenitors	0.119201	0.169106
0.0122753	-0.516264	0.052	0.081	1	DS_vs_CTL	SoloTE-HERVP71A-int	0.0264204	TRUE	Astrocyte_progenitors	0.0779696	0.1377
0.0253949	-0.517623	0.102	0.135	1	DS_vs_CTL	SoloTE-MER4D	0.0488363	TRUE	Astrocyte_progenitors	0.211893	0.239876
0.220167	-0.518452	0.045	0.061	1	DS_vs_CTL	SoloTE-HERVK14-int	0.284511	FALSE	Astrocyte_progenitors	0.110757	0.151513
0.167516	-0.51888	0.045	0.062	1	DS_vs_CTL	SoloTE-L1M6B	0.225435	FALSE	Astrocyte_progenitors	0.121688	0.151666
0.0332006	-0.522378	0.039	0.06	1	DS_vs_CTL	SoloTE-L1MEa	0.0584834	FALSE	Astrocyte_progenitors	0.0761063	0.113747
0.130075	-0.525765	0.052	0.069	1	DS_vs_CTL	SoloTE-MER11B	0.182933	FALSE	Astrocyte_progenitors	0.0994457	0.147884
0.000802791	-0.526765	0.082	0.126	0.86862	DS_vs_CTL	SoloTE-Charlie16a	0.00257051	TRUE	Astrocyte_progenitors	0.222019	0.309655
0.130663	-0.530838	0.051	0.068	1	DS_vs_CTL	SoloTE-MLT1B-int	0.183041	FALSE	Astrocyte_progenitors	0.0782173	0.115374
7.37343e-67	-0.533163	0.943	0.975	7.97805e-64	DS_vs_CTL	SoloTE-L1PA5	1.19818e-64	TRUE	Astrocyte_progenitors	8.31705	13.6655
0.0104068	-0.534926	0.152	0.192	1	DS_vs_CTL	SoloTE-LTR5A	0.0229302	TRUE	Astrocyte_progenitors	0.288207	0.295561
0.0504902	-0.536661	0.076	0.103	1	DS_vs_CTL	SoloTE-MLT2F	0.0845841	FALSE	Astrocyte_progenitors	0.126734	0.219043
1.36401e-50	-0.537069	0.876	0.926	1.47586e-47	DS_vs_CTL	SoloTE-L1PA16	1.77321e-48	TRUE	Astrocyte_progenitors	5.68962	10.1279
8.44405e-15	-0.544012	0.435	0.593	9.13646e-12	DS_vs_CTL	SoloTE-L1PB3	1.44438e-13	TRUE	Astrocyte_progenitors	1.31327	2.1872
0.0677662	-0.544699	0.033	0.051	1	DS_vs_CTL	SoloTE-Charlie13a	0.108226	FALSE	Astrocyte_progenitors	0.0927798	0.141945
0.172075	-0.54945	0.048	0.065	1	DS_vs_CTL	SoloTE-HERV9N-int	0.231093	FALSE	Astrocyte_progenitors	0.0340188	0.063308
0.00351231	-0.552718	0.13	0.179	1	DS_vs_CTL	SoloTE-MER11C	0.009132	TRUE	Astrocyte_progenitors	0.298633	0.319514
0.0148855	-0.556255	0.07	0.087	1	DS_vs_CTL	SoloTE-MLT1A1-int	0.0308029	TRUE	Astrocyte_progenitors	0.163508	0.163287
0.000614628	-0.5601	0.106	0.16	0.665028	DS_vs_CTL	SoloTE-THE1A-int	0.00209167	TRUE	Astrocyte_progenitors	0.284282	0.478383
0.0259348	-0.566069	0.074	0.104	1	DS_vs_CTL	SoloTE-L1PBb	0.049549	TRUE	Astrocyte_progenitors	0.173152	0.201345
0.00977143	-0.56869	0.08	0.117	1	DS_vs_CTL	SoloTE-Tigger5b	0.0216772	TRUE	Astrocyte_progenitors	0.23901	0.331127
0.00497087	-0.573944	0.039	0.065	1	DS_vs_CTL	SoloTE-LTR1A1	0.0124272	TRUE	Astrocyte_progenitors	0.0812065	0.0991962
0.0281093	-0.58187	0.048	0.073	1	DS_vs_CTL	SoloTE-LOR1a	0.0521415	FALSE	Astrocyte_progenitors	0.0995137	0.12586
2.07087e-06	-0.593905	0.202	0.291	0.00224069	DS_vs_CTL	SoloTE-MER1A	1.34513e-05	TRUE	Astrocyte_progenitors	0.533974	0.708073
0.103802	-0.59687	0.037	0.055	1	DS_vs_CTL	SoloTE-LTR16B	0.153693	FALSE	Astrocyte_progenitors	0.0791901	0.0973885
0.0052846	-0.604849	0.077	0.115	1	DS_vs_CTL	SoloTE-LTR8A	0.0131106	TRUE	Astrocyte_progenitors	0.17861	0.226365
0.00628752	-0.606543	0.093	0.13	1	DS_vs_CTL	SoloTE-LTR6A	0.0151929	TRUE	Astrocyte_progenitors	0.17602	0.185612
0.021539	-0.609747	0.061	0.09	1	DS_vs_CTL	SoloTE-MamGypLTR3a	0.0424253	TRUE	Astrocyte_progenitors	0.115442	0.161109
4.0684e-07	-0.609943	0.26	0.356	0.000440201	DS_vs_CTL	SoloTE-LTR12C	2.9713e-06	TRUE	Astrocyte_progenitors	0.567307	0.643458
0.0114379	-0.611921	0.085	0.117	1	DS_vs_CTL	SoloTE-Charlie9	0.0250324	TRUE	Astrocyte_progenitors	0.173998	0.229336
0.00317495	-0.61672	0.086	0.129	1	DS_vs_CTL	SoloTE-MLT2C1	0.00835514	TRUE	Astrocyte_progenitors	0.185173	0.234225
0.0922119	-0.617106	0.045	0.058	1	DS_vs_CTL	SoloTE-Charlie17	0.14103	FALSE	Astrocyte_progenitors	0.108916	0.153973
4.65178e-05	-0.622145	0.135	0.204	0.0503322	DS_vs_CTL	SoloTE-MER45A	0.000223975	TRUE	Astrocyte_progenitors	0.251802	0.339698
1.1528e-83	-0.625434	0.97	0.987	1.24733e-80	DS_vs_CTL	SoloTE-L1PA4	2.49773e-81	TRUE	Astrocyte_progenitors	11.1711	16.2987
0.00231079	-0.625811	0.083	0.127	1	DS_vs_CTL	SoloTE-HERVIP10B3-int	0.00647537	TRUE	Astrocyte_progenitors	0.229984	0.245428
0.00582395	-0.629155	0.057	0.09	1	DS_vs_CTL	SoloTE-LTR16A1	0.0142314	TRUE	Astrocyte_progenitors	0.0998765	0.176674
0.0119665	-0.630268	0.032	0.055	1	DS_vs_CTL	SoloTE-MLT1I-int	0.0260141	TRUE	Astrocyte_progenitors	0.0605222	0.0932982
1.47685e-05	-0.634988	0.153	0.228	0.0159796	DS_vs_CTL	SoloTE-L1M3c	7.99963e-05	TRUE	Astrocyte_progenitors	0.377382	0.456593
0.0844231	-0.635911	0.033	0.052	1	DS_vs_CTL	SoloTE-Mam-R4	0.13128	FALSE	Astrocyte_progenitors	0.0690563	0.127453
1.4815e-12	-0.636121	0.351	0.49	1.60298e-09	DS_vs_CTL	SoloTE-THE1B-int	1.96525e-11	TRUE	Astrocyte_progenitors	0.923728	1.46537
0.000351321	-0.636162	0.079	0.127	0.380129	DS_vs_CTL	SoloTE-LTR9D	0.00126165	TRUE	Astrocyte_progenitors	0.131058	0.168707
0.000789126	-0.637907	0.1	0.15	0.853834	DS_vs_CTL	SoloTE-LTR16A	0.00253927	TRUE	Astrocyte_progenitors	0.261314	0.389998
6.38114e-07	-0.644229	0.153	0.239	0.000690439	DS_vs_CTL	SoloTE-L1M2c	4.50841e-06	TRUE	Astrocyte_progenitors	0.281509	0.402756
0.0049164	-0.655183	0.078	0.116	1	DS_vs_CTL	SoloTE-MamGypsy2-I	0.0123385	TRUE	Astrocyte_progenitors	0.154518	0.244141
0.000220314	-0.661386	0.106	0.163	0.238379	DS_vs_CTL	SoloTE-Tigger8	0.000832581	TRUE	Astrocyte_progenitors	0.246563	0.294022
0.000687807	-0.668078	0.04	0.072	0.744207	DS_vs_CTL	SoloTE-MER91C	0.00226941	TRUE	Astrocyte_progenitors	0.0619536	0.0988527
2.65095e-06	-0.676318	0.197	0.271	0.00286833	DS_vs_CTL	SoloTE-HERVK9-int	1.67293e-05	TRUE	Astrocyte_progenitors	0.390456	0.466287
2.71512e-14	-0.677906	0.347	0.496	2.93776e-11	DS_vs_CTL	SoloTE-L1PBa	4.30446e-13	TRUE	Astrocyte_progenitors	0.989582	1.28141
1.06335e-05	-0.679228	0.144	0.218	0.0115054	DS_vs_CTL	SoloTE-MER97c	6.1166e-05	TRUE	Astrocyte_progenitors	0.174964	0.193592
0.0350701	-0.690333	0.047	0.069	1	DS_vs_CTL	SoloTE-LTR16B1	0.0611141	FALSE	Astrocyte_progenitors	0.0789913	0.125151
0.000117608	-0.697143	0.053	0.096	0.127252	DS_vs_CTL	SoloTE-LTR48B	0.000493196	TRUE	Astrocyte_progenitors	0.105601	0.143661
2.91152e-06	-0.698057	0.085	0.148	0.00315027	DS_vs_CTL	SoloTE-MER91A	1.80237e-05	TRUE	Astrocyte_progenitors	0.192412	0.320452
0.0113424	-0.706142	0.047	0.076	1	DS_vs_CTL	SoloTE-Kanga1a	0.0249073	TRUE	Astrocyte_progenitors	0.120315	0.164156
0.0987951	-0.708254	0.039	0.055	1	DS_vs_CTL	SoloTE-LTR85b	0.14865	FALSE	Astrocyte_progenitors	0.0772305	0.162211
8.2067e-41	-0.717237	0.681	0.832	8.87965e-38	DS_vs_CTL	SoloTE-L1HS	6.66794e-39	TRUE	Astrocyte_progenitors	3.41699	3.23246
1.30021e-05	-0.725175	0.126	0.194	0.0140682	DS_vs_CTL	SoloTE-MER77B	7.16216e-05	TRUE	Astrocyte_progenitors	0.381145	0.476847
0.00544627	-0.731604	0.057	0.087	1	DS_vs_CTL	SoloTE-LTR33A	0.0134604	TRUE	Astrocyte_progenitors	0.123746	0.173935
0.0314701	-0.738778	0.036	0.054	1	DS_vs_CTL	SoloTE-MER5C1	0.0560427	FALSE	Astrocyte_progenitors	0.0823945	0.133156
0.0373453	-0.740388	0.041	0.061	1	DS_vs_CTL	SoloTE-MSTA1	0.0643884	FALSE	Astrocyte_progenitors	0.0596423	0.0945747
9.84682e-05	-0.740472	0.088	0.144	0.106543	DS_vs_CTL	SoloTE-THE1C-int	0.00042387	TRUE	Astrocyte_progenitors	0.141505	0.319306
0.000118375	-0.740519	0.089	0.145	0.128082	DS_vs_CTL	SoloTE-MER45B	0.000493231	TRUE	Astrocyte_progenitors	0.267755	0.346336
0.0140192	-0.74267	0.032	0.056	1	DS_vs_CTL	SoloTE-L1P5	0.0294903	TRUE	Astrocyte_progenitors	0.353272	0.343703
0.000184297	-0.749714	0.074	0.125	0.199409	DS_vs_CTL	SoloTE-MER31A	0.000713052	TRUE	Astrocyte_progenitors	0.186918	0.251644
9.29024e-05	-0.762588	0.067	0.117	0.10052	DS_vs_CTL	SoloTE-MER66B	0.000402577	TRUE	Astrocyte_progenitors	0.218225	0.260304
0.000672823	-0.766648	0.055	0.096	0.727994	DS_vs_CTL	SoloTE-LTR89	0.0022313	TRUE	Astrocyte_progenitors	0.111639	0.157217
0.00165969	-0.834274	0.051	0.087	1	DS_vs_CTL	SoloTE-MER54A	0.00494863	TRUE	Astrocyte_progenitors	0.0822028	0.148203
0.0424276	-0.84039	0.033	0.05	1	DS_vs_CTL	SoloTE-AluYh7	0.072005	FALSE	Astrocyte_progenitors	0.0822967	0.0677924
1.59341e-122	-0.842776	0.949	0.985	1.72407e-119	DS_vs_CTL	SoloTE-L1PA2	5.17858e-120	TRUE	Astrocyte_progenitors	9.5004	10.2916
2.537e-35	-0.852137	0.483	0.691	2.74503e-32	DS_vs_CTL	SoloTE-L1P1	1.64905e-33	TRUE	Astrocyte_progenitors	1.56017	1.82015
0.00261961	-0.857175	0.039	0.07	1	DS_vs_CTL	SoloTE-LTR33B	0.00718458	TRUE	Astrocyte_progenitors	0.0973773	0.132379
3.99539e-09	-0.857726	0.103	0.192	4.32301e-06	DS_vs_CTL	SoloTE-L5	3.76377e-08	TRUE	Astrocyte_progenitors	0.168676	0.184983
2.25356e-21	-0.859929	0.3	0.487	2.43836e-18	DS_vs_CTL	SoloTE-L1PA12	7.32408e-20	TRUE	Astrocyte_progenitors	1.02975	1.2646
5.66771e-05	-0.862851	0.075	0.128	0.0613246	DS_vs_CTL	SoloTE-MLT2B2	0.000261277	TRUE	Astrocyte_progenitors	0.146069	0.250657
0.00246668	-0.865014	0.05	0.083	1	DS_vs_CTL	SoloTE-LTR101-Mam	0.00682273	TRUE	Astrocyte_progenitors	0.0850428	0.14026
0.0072156	-0.867198	0.045	0.074	1	DS_vs_CTL	SoloTE-LTR46	0.0169319	TRUE	Astrocyte_progenitors	0.0389935	0.0736168
0.0300588	-0.869037	0.033	0.052	1	DS_vs_CTL	SoloTE-LTR12D	0.0544241	FALSE	Astrocyte_progenitors	0.049839	0.0526525
1.73877e-41	-0.882304	0.578	0.76	1.88135e-38	DS_vs_CTL	SoloTE-HERVH-int	1.61457e-39	TRUE	Astrocyte_progenitors	2.37606	2.47737
1.92032e-173	-0.895792	0.984	0.994	2.07779e-170	DS_vs_CTL	SoloTE-L1PA3	1.24821e-170	TRUE	Astrocyte_progenitors	15.0102	18.5481
1.84495e-05	-0.904835	0.084	0.14	0.0199624	DS_vs_CTL	SoloTE-HERVE-int	9.82966e-05	TRUE	Astrocyte_progenitors	0.126055	0.157635
0.000718159	-0.957512	0.026	0.055	0.777048	DS_vs_CTL	SoloTE-LTR88b	0.00234575	TRUE	Astrocyte_progenitors	0.0867745	0.118429
5.90972e-05	-0.958089	0.042	0.085	0.0639431	DS_vs_CTL	SoloTE-LTR12E	0.000268623	TRUE	Astrocyte_progenitors	0.188335	0.135103
3.40176e-05	-1.01056	0.053	0.1	0.036807	DS_vs_CTL	SoloTE-MER89	0.000165011	TRUE	Astrocyte_progenitors	0.102885	0.157562
0.000661119	-1.09422	0.022	0.051	0.71533	DS_vs_CTL	SoloTE-LTR19-int	0.00221509	TRUE	Astrocyte_progenitors	0.0444375	0.0592172
1.83039e-20	-1.12122	0.214	0.372	1.98048e-17	DS_vs_CTL	SoloTE-THE1D-int	5.40797e-19	TRUE	Astrocyte_progenitors	0.50169	0.694974
1.49896e-09	-1.12956	0.056	0.13	1.62187e-06	DS_vs_CTL	SoloTE-X6A-LINE	1.47625e-08	TRUE	Astrocyte_progenitors	0.141144	0.216151
6.80082e-05	-1.13983	0.051	0.09	0.0735849	DS_vs_CTL	SoloTE-HERV3-int	0.000304864	TRUE	Astrocyte_progenitors	0.128091	0.143741
7.29432e-08	-1.15135	0.045	0.106	7.89245e-05	DS_vs_CTL	SoloTE-LTR103-Mam	6.23856e-07	TRUE	Astrocyte_progenitors	0.318036	0.445474
5.50483e-05	-1.15783	0.041	0.081	0.0595623	DS_vs_CTL	SoloTE-MER34C2	0.000255674	TRUE	Astrocyte_progenitors	0.0759566	0.0825873
0.00106355	-1.16667	0.03	0.06	1	DS_vs_CTL	SoloTE-MSTC-int	0.00330769	TRUE	Astrocyte_progenitors	0.0474586	0.0753324
3.27733e-05	-1.23611	0.025	0.061	0.0354607	DS_vs_CTL	SoloTE-LTR45B	0.00016017	TRUE	Astrocyte_progenitors	0.0558549	0.0750772
1.25131e-05	-1.3189	0.029	0.07	0.0135392	DS_vs_CTL	SoloTE-MER96	6.95174e-05	TRUE	Astrocyte_progenitors	0.085303	0.0980726
5.50683e-05	-1.54384	0.02	0.052	0.0595839	DS_vs_CTL	SoloTE-MER45R	0.000255674	TRUE	Astrocyte_progenitors	0.0439678	0.0632944
1.44086e-44	-1.5464	0.304	0.512	1.55901e-41	DS_vs_CTL	SoloTE-MSTA-int	1.56093e-42	TRUE	Astrocyte_progenitors	0.558649	0.838749
8.42469e-10	-2.51308	0.008	0.05	9.11552e-07	DS_vs_CTL	SoloTE-MSTB2-int	8.55633e-09	TRUE	Astrocyte_progenitors	0.024393	0.0342336

## Sheet: Cycling_progenitors
p_val	avg_log2FC	pct.1	pct.2	p_val_adj	comparison	gene	FDR	sig	cellsubtype	CTL_expression	DS_expression
7.05224e-37	2.32617	0.151	0.024	7.63052e-34	DS_vs_CTL	SoloTE-L1M2b	5.97761e-36	TRUE	Cycling_progenitors	0.0586965	0.128286
1.51923e-19	2.1543	0.078	0.013	1.6438e-16	DS_vs_CTL	SoloTE-CR1-16-AMi	7.40883e-19	TRUE	Cycling_progenitors	0.0253402	0.118225
4.61612e-13	1.87403	0.067	0.015	4.99464e-10	DS_vs_CTL	SoloTE-LTR40c	1.47385e-12	TRUE	Cycling_progenitors	0.039783	0.0818079
6.66803e-14	1.80933	0.077	0.018	7.21481e-11	DS_vs_CTL	SoloTE-LTR86A1	2.37382e-13	TRUE	Cycling_progenitors	0.0402839	0.0692566
1.58745e-19	1.61527	0.126	0.036	1.71763e-16	DS_vs_CTL	SoloTE-HUERS-P3b-int	7.68889e-19	TRUE	Cycling_progenitors	0.0995962	0.25232
2.37302e-16	1.58922	0.107	0.031	2.56761e-13	DS_vs_CTL	SoloTE-LTR16E2	9.93879e-16	TRUE	Cycling_progenitors	0.109368	0.187843
5.16162e-24	1.54637	0.151	0.043	5.58487e-21	DS_vs_CTL	SoloTE-MER91B	2.94006e-23	TRUE	Cycling_progenitors	0.108569	0.174371
1.28356e-13	1.50089	0.132	0.05	1.38881e-10	DS_vs_CTL	SoloTE-LTR102-Mam	4.41496e-13	TRUE	Cycling_progenitors	0.118287	0.174333
3.40129e-13	1.47154	0.073	0.019	3.6802e-10	DS_vs_CTL	SoloTE-MLT1H1-int	1.11088e-12	TRUE	Cycling_progenitors	0.0458526	0.0754945
5.0934e-14	1.43865	0.103	0.033	5.51105e-11	DS_vs_CTL	SoloTE-LTR85b	1.84086e-13	TRUE	Cycling_progenitors	0.0772305	0.162211
4.70939e-11	1.38337	0.089	0.031	5.09556e-08	DS_vs_CTL	SoloTE-ERVL-int	1.24188e-10	TRUE	Cycling_progenitors	0.0839332	0.131175
1.18131e-15	1.34374	0.104	0.032	1.27818e-12	DS_vs_CTL	SoloTE-Mam-R4	4.80624e-15	TRUE	Cycling_progenitors	0.0690563	0.127453
2.5373e-12	1.32464	0.108	0.039	2.74536e-09	DS_vs_CTL	SoloTE-HERVK14-int	7.65492e-12	TRUE	Cycling_progenitors	0.110757	0.151513
1.25595e-65	1.3069	0.58	0.473	1.35894e-62	DS_vs_CTL	SoloTE-L1MA1	1.4904e-63	TRUE	Cycling_progenitors	1.43	2.91038
3.99976e-11	1.29754	0.081	0.027	4.32774e-08	DS_vs_CTL	SoloTE-HERV9NC-int	1.0666e-10	TRUE	Cycling_progenitors	0.0760393	0.111348
7.60255e-19	1.29697	0.171	0.064	8.22596e-16	DS_vs_CTL	SoloTE-THE1C-int	3.44778e-18	TRUE	Cycling_progenitors	0.141505	0.319306
2.17668e-08	1.26983	0.054	0.017	2.35516e-05	DS_vs_CTL	SoloTE-MLT1F1-int	4.14441e-08	TRUE	Cycling_progenitors	0.0241925	0.0486602
2.31603e-17	1.2631	0.195	0.082	2.50594e-14	DS_vs_CTL	SoloTE-L2-1-AMi	1.00549e-16	TRUE	Cycling_progenitors	0.13656	0.30575
3.7877e-13	1.25964	0.094	0.032	4.09829e-10	DS_vs_CTL	SoloTE-Charlie14a	1.22584e-12	TRUE	Cycling_progenitors	0.0477502	0.0893916
2.3809e-10	1.25892	0.099	0.038	2.57613e-07	DS_vs_CTL	SoloTE-Tigger17c	5.73172e-10	TRUE	Cycling_progenitors	0.108859	0.146711
9.98913e-22	1.25264	0.242	0.103	1.08082e-18	DS_vs_CTL	SoloTE-HERV17-int	5.34756e-21	TRUE	Cycling_progenitors	0.243114	0.375493
9.49328e-18	1.24509	0.207	0.089	1.02717e-14	DS_vs_CTL	SoloTE-Tigger16b	4.17235e-17	TRUE	Cycling_progenitors	0.172434	0.342406
1.85948e-10	1.2372	0.054	0.016	2.01195e-07	DS_vs_CTL	SoloTE-LTR86B2	4.54965e-10	TRUE	Cycling_progenitors	0.0393453	0.0657294
3.58636e-17	1.22656	0.121	0.041	3.88044e-14	DS_vs_CTL	SoloTE-MER5C1	1.52904e-16	TRUE	Cycling_progenitors	0.0823945	0.133156
1.62457e-14	1.22164	0.107	0.036	1.75779e-11	DS_vs_CTL	SoloTE-L1M3de	5.99325e-14	TRUE	Cycling_progenitors	0.142332	0.209755
3.85744e-15	1.19887	0.16	0.066	4.17375e-12	DS_vs_CTL	SoloTE-LTR52	1.5174e-14	TRUE	Cycling_progenitors	0.115389	0.184328
4.20288e-09	1.19864	0.08	0.03	4.54752e-06	DS_vs_CTL	SoloTE-UCON132b	8.62378e-09	TRUE	Cycling_progenitors	0.0522084	0.086248
5.38644e-09	1.19065	0.058	0.019	5.82813e-06	DS_vs_CTL	SoloTE-hAT-N1-Mam	1.09576e-08	TRUE	Cycling_progenitors	0.0406595	0.0654929
6.20608e-11	1.18819	0.089	0.033	6.71497e-08	DS_vs_CTL	SoloTE-MLT1C-int	1.61858e-10	TRUE	Cycling_progenitors	0.0609605	0.131591
2.81854e-11	1.1877	0.1	0.038	3.04966e-08	DS_vs_CTL	SoloTE-MER85	7.65954e-11	TRUE	Cycling_progenitors	0.0692249	0.105122
4.36673e-10	1.17353	0.072	0.024	4.72481e-07	DS_vs_CTL	SoloTE-MamGypLTR1b	1.01605e-09	TRUE	Cycling_progenitors	0.0563622	0.0938444
3.20606e-15	1.1523	0.094	0.031	3.46896e-12	DS_vs_CTL	SoloTE-Tigger5	1.27526e-14	TRUE	Cycling_progenitors	0.112113	0.157197
1.12454e-11	1.13742	0.098	0.037	1.21675e-08	DS_vs_CTL	SoloTE-LTR1A2	3.21554e-11	TRUE	Cycling_progenitors	0.0984298	0.172168
8.94611e-10	1.11648	0.095	0.038	9.6797e-07	DS_vs_CTL	SoloTE-HERV16-int	2.01483e-09	TRUE	Cycling_progenitors	0.101069	0.155944
2.42946e-54	1.10708	0.56	0.431	2.62868e-51	DS_vs_CTL	SoloTE-L1MA5A	7.86262e-53	TRUE	Cycling_progenitors	1.23145	2.11585
3.7495e-08	1.09828	0.107	0.049	4.05696e-05	DS_vs_CTL	SoloTE-Ricksha	7.02538e-08	TRUE	Cycling_progenitors	0.213622	0.333721
4.86141e-19	1.07166	0.161	0.063	5.26005e-16	DS_vs_CTL	SoloTE-LTR8B	2.23311e-18	TRUE	Cycling_progenitors	0.173413	0.25238
5.41423e-08	1.06641	0.053	0.019	5.8582e-05	DS_vs_CTL	SoloTE-MER61A	9.68576e-08	TRUE	Cycling_progenitors	0.0500836	0.0857689
2.87397e-11	1.06577	0.112	0.046	3.10964e-08	DS_vs_CTL	SoloTE-Charlie3	7.78048e-11	TRUE	Cycling_progenitors	0.100109	0.155202
6.11124e-07	1.06537	0.076	0.033	0.000661236	DS_vs_CTL	SoloTE-HERVP71A-int	9.91163e-07	TRUE	Cycling_progenitors	0.0779696	0.1377
7.9049e-11	1.06531	0.1	0.04	8.5531e-08	DS_vs_CTL	SoloTE-LTR10F	2.03923e-10	TRUE	Cycling_progenitors	0.108797	0.145854
9.17332e-70	1.06001	0.945	0.927	9.92553e-67	DS_vs_CTL	SoloTE-L1MC1	3.2657e-67	TRUE	Cycling_progenitors	6.15815	10.972
1.98447e-57	1.05815	0.65	0.571	2.14719e-54	DS_vs_CTL	SoloTE-L1MA5	8.83087e-56	TRUE	Cycling_progenitors	1.71533	3.0412
1.35423e-07	1.05491	0.052	0.019	0.000146527	DS_vs_CTL	SoloTE-X9-LINE	2.32901e-07	TRUE	Cycling_progenitors	0.0350859	0.0541156
1.25989e-48	1.05129	0.559	0.437	1.3632e-45	DS_vs_CTL	SoloTE-L1PB3	2.18791e-47	TRUE	Cycling_progenitors	1.31327	2.1872
6.03455e-15	1.04608	0.15	0.063	6.52938e-12	DS_vs_CTL	SoloTE-Ricksha-c	2.31e-14	TRUE	Cycling_progenitors	0.138705	0.213927
9.45819e-68	1.0383	0.879	0.858	1.02338e-64	DS_vs_CTL	SoloTE-L1MA3	1.74832e-65	TRUE	Cycling_progenitors	4.77854	8.09659
5.5883e-12	1.03623	0.109	0.043	6.04654e-09	DS_vs_CTL	SoloTE-Charlie13a	1.6374e-11	TRUE	Cycling_progenitors	0.0927798	0.141945
2.98922e-46	1.03514	0.544	0.422	3.23433e-43	DS_vs_CTL	SoloTE-L1PA8A	4.09293e-45	TRUE	Cycling_progenitors	1.31199	2.36171
9.72318e-06	1.03302	0.058	0.024	0.0105205	DS_vs_CTL	SoloTE-Charlie26a	1.33905e-05	TRUE	Cycling_progenitors	0.0660352	0.0909777
1.56762e-08	1.03245	0.09	0.039	1.69617e-05	DS_vs_CTL	SoloTE-X7A-LINE	3.02077e-08	TRUE	Cycling_progenitors	0.0830171	0.106505
9.11803e-10	1.03086	0.093	0.038	9.86571e-07	DS_vs_CTL	SoloTE-Charlie30a	2.04152e-09	TRUE	Cycling_progenitors	0.0814214	0.125953
4.74994e-10	1.01478	0.112	0.048	5.13944e-07	DS_vs_CTL	SoloTE-LTR48B	1.10162e-09	TRUE	Cycling_progenitors	0.105601	0.143661
5.04362e-14	1.0143	0.182	0.084	5.4572e-11	DS_vs_CTL	SoloTE-AmnSINE1	1.83217e-13	TRUE	Cycling_progenitors	0.192393	0.316409
1.14984e-08	1.01312	0.069	0.027	1.24413e-05	DS_vs_CTL	SoloTE-MER4A1-	2.24914e-08	TRUE	Cycling_progenitors	0.0476959	0.0776363
1.13303e-50	1.00409	0.867	0.874	1.22594e-47	DS_vs_CTL	SoloTE-L1PA6	2.30491e-49	TRUE	Cycling_progenitors	5.3977	9.12062
1.61352e-60	1.0036	0.76	0.704	1.74583e-57	DS_vs_CTL	SoloTE-L1MA4A	1.14883e-58	TRUE	Cycling_progenitors	2.6354	4.78142
1.52858e-51	0.992558	0.967	0.973	1.65393e-48	DS_vs_CTL	SoloTE-L1PA7	3.59991e-50	TRUE	Cycling_progenitors	10.1212	17.6726
4.74745e-18	0.992318	0.295	0.154	5.13675e-15	DS_vs_CTL	SoloTE-MER117	2.0995e-17	TRUE	Cycling_progenitors	0.369235	0.562102
1.63833e-24	0.990736	0.424	0.242	1.77267e-21	DS_vs_CTL	SoloTE-MLT1E1A	9.48367e-24	TRUE	Cycling_progenitors	0.680537	1.08659
2.80963e-57	0.990527	0.914	0.903	3.04002e-54	DS_vs_CTL	SoloTE-L1PA16	1.17674e-55	TRUE	Cycling_progenitors	5.68962	10.1279
6.49331e-63	0.988806	0.612	0.573	7.02576e-60	DS_vs_CTL	SoloTE-L1MA6	5.77905e-61	TRUE	Cycling_progenitors	1.75047	3.17345
3.1439e-17	0.984842	0.303	0.166	3.4017e-14	DS_vs_CTL	SoloTE-MER46C	1.34847e-16	TRUE	Cycling_progenitors	0.380881	0.596985
5.65496e-26	0.97934	0.416	0.283	6.11867e-23	DS_vs_CTL	SoloTE-L1M4a2	3.47098e-25	TRUE	Cycling_progenitors	0.668815	1.24614
1.08374e-12	0.97795	0.137	0.059	1.17261e-09	DS_vs_CTL	SoloTE-LTR87	3.34037e-12	TRUE	Cycling_progenitors	0.115064	0.163485
2.97545e-09	0.976222	0.107	0.047	3.21943e-06	DS_vs_CTL	SoloTE-LTR41B	6.30511e-09	TRUE	Cycling_progenitors	0.125265	0.168519
1.61987e-09	0.972951	0.077	0.031	1.7527e-06	DS_vs_CTL	SoloTE-MLT1H-int	3.52706e-09	TRUE	Cycling_progenitors	0.0816306	0.146447
4.21337e-19	0.970396	0.35	0.201	4.55886e-16	DS_vs_CTL	SoloTE-CR1-Mam	1.948e-18	TRUE	Cycling_progenitors	0.472095	0.686156
2.52428e-36	0.969968	0.5	0.365	2.73127e-33	DS_vs_CTL	SoloTE-Tigger3a	2.06585e-35	TRUE	Cycling_progenitors	0.850236	1.36352
4.58577e-06	0.961486	0.052	0.021	0.0049618	DS_vs_CTL	SoloTE-MER66C	6.5828e-06	TRUE	Cycling_progenitors	0.0412107	0.0574661
1.14363e-07	0.954439	0.073	0.031	0.000123741	DS_vs_CTL	SoloTE-LTR45C	1.98118e-07	TRUE	Cycling_progenitors	0.0778941	0.104116
2.2472e-47	0.949823	0.88	0.848	2.43147e-44	DS_vs_CTL	SoloTE-L1MA4	3.40426e-46	TRUE	Cycling_progenitors	4.20235	7.51484
7.41352e-15	0.946655	0.269	0.146	8.02143e-12	DS_vs_CTL	SoloTE-LTR16C	2.79282e-14	TRUE	Cycling_progenitors	0.383912	0.628033
5.77441e-14	0.945694	0.111	0.044	6.24792e-11	DS_vs_CTL	SoloTE-CR1-3-Croc	2.07646e-13	TRUE	Cycling_progenitors	0.0881825	0.175142
2.75566e-07	0.944986	0.067	0.028	0.000298163	DS_vs_CTL	SoloTE-LTR12	4.59493e-07	TRUE	Cycling_progenitors	0.087523	0.120542
3.03707e-08	0.939666	0.075	0.031	3.28611e-05	DS_vs_CTL	SoloTE-MamRep1879	5.70552e-08	TRUE	Cycling_progenitors	0.0692383	0.112753
4.98988e-13	0.936667	0.193	0.096	5.39905e-10	DS_vs_CTL	SoloTE-MER6A	1.57902e-12	TRUE	Cycling_progenitors	0.175851	0.304564
6.3253e-31	0.934265	0.939	0.947	6.84397e-28	DS_vs_CTL	SoloTE-L1PA5	4.3304e-30	TRUE	Cycling_progenitors	8.31705	13.6655
1.26819e-09	0.933055	0.084	0.034	1.37219e-06	DS_vs_CTL	SoloTE-L1MEa	2.79553e-09	TRUE	Cycling_progenitors	0.0761063	0.113747
3.87944e-48	0.93281	0.956	0.946	4.19755e-45	DS_vs_CTL	SoloTE-L1MB3	6.42363e-47	TRUE	Cycling_progenitors	6.85782	11.7936
1.75497e-58	0.932083	0.819	0.803	1.89888e-55	DS_vs_CTL	SoloTE-L1MC4a	8.92526e-57	TRUE	Cycling_progenitors	3.45157	5.71215
2.52599e-16	0.921296	0.322	0.186	2.73312e-13	DS_vs_CTL	SoloTE-L2-3-Crp	1.05176e-15	TRUE	Cycling_progenitors	0.367605	0.631421
2.38285e-10	0.920758	0.062	0.022	2.57824e-07	DS_vs_CTL	SoloTE-MER47C	5.73172e-10	TRUE	Cycling_progenitors	0.0516912	0.0721554
4.79044e-59	0.919696	0.845	0.808	5.18326e-56	DS_vs_CTL	SoloTE-L1MD1	2.84233e-57	TRUE	Cycling_progenitors	3.35563	5.72151
3.86373e-10	0.913054	0.082	0.033	4.18056e-07	DS_vs_CTL	SoloTE-MER47B	9.07913e-10	TRUE	Cycling_progenitors	0.0806895	0.127001
1.71799e-46	0.908767	0.836	0.827	1.85887e-43	DS_vs_CTL	SoloTE-L1MA2	2.49635e-45	TRUE	Cycling_progenitors	3.56858	6.48243
3.34852e-49	0.897241	0.803	0.782	3.6231e-46	DS_vs_CTL	SoloTE-L1PA11	6.1132e-48	TRUE	Cycling_progenitors	3.03043	5.26764
1.03205e-12	0.89553	0.226	0.121	1.11668e-09	DS_vs_CTL	SoloTE-MLT1A0-int	3.19488e-12	TRUE	Cycling_progenitors	0.265513	0.417509
3.32315e-12	0.892122	0.253	0.143	3.59565e-09	DS_vs_CTL	SoloTE-Charlie15a	9.98347e-12	TRUE	Cycling_progenitors	0.2954	0.422985
1.73141e-61	0.891287	0.807	0.799	1.87339e-58	DS_vs_CTL	SoloTE-L1MC3	1.36974e-59	TRUE	Cycling_progenitors	3.5819	5.6904
2.53873e-08	0.89075	0.071	0.029	2.74691e-05	DS_vs_CTL	SoloTE-MLT1I-int	4.80738e-08	TRUE	Cycling_progenitors	0.0605222	0.0932982
9.3025e-11	0.885956	0.115	0.051	1.00653e-07	DS_vs_CTL	SoloTE-Charlie17a	2.35707e-10	TRUE	Cycling_progenitors	0.0951402	0.159792
2.98582e-55	0.884357	0.665	0.627	3.23066e-52	DS_vs_CTL	SoloTE-L1PA14	1.1189e-53	TRUE	Cycling_progenitors	1.86671	3.1732
2.07024e-08	0.883702	0.106	0.051	2.24e-05	DS_vs_CTL	SoloTE-LTR81A	3.9624e-08	TRUE	Cycling_progenitors	0.111151	0.177966
6.81377e-14	0.880544	0.12	0.051	7.3725e-11	DS_vs_CTL	SoloTE-LTR16A1	2.41363e-13	TRUE	Cycling_progenitors	0.0998765	0.176674
2.05714e-09	0.880508	0.075	0.03	2.22583e-06	DS_vs_CTL	SoloTE-MER135	4.43844e-09	TRUE	Cycling_progenitors	0.0741445	0.123716
3.51292e-14	0.88008	0.194	0.095	3.80098e-11	DS_vs_CTL	SoloTE-MER63A	1.28928e-13	TRUE	Cycling_progenitors	0.242636	0.365156
2.66519e-49	0.877036	0.962	0.954	2.88373e-46	DS_vs_CTL	SoloTE-HAL1	4.99372e-48	TRUE	Cycling_progenitors	8.03312	12.9386
1.16763e-13	0.874847	0.151	0.068	1.26338e-10	DS_vs_CTL	SoloTE-HERVL40-int	4.03571e-13	TRUE	Cycling_progenitors	0.153594	0.227823
1.11804e-31	0.873754	0.499	0.372	1.20972e-28	DS_vs_CTL	SoloTE-L1M6	7.88166e-31	TRUE	Cycling_progenitors	1.07546	1.69337
9.73885e-09	0.871327	0.101	0.047	1.05374e-05	DS_vs_CTL	SoloTE-L1MEg2	1.92079e-08	TRUE	Cycling_progenitors	0.0986214	0.159918
5.80269e-52	0.868316	0.867	0.826	6.27851e-49	DS_vs_CTL	SoloTE-L1MA9	1.47554e-50	TRUE	Cycling_progenitors	4.53445	7.48945
6.48143e-12	0.867676	0.101	0.043	7.0129e-09	DS_vs_CTL	SoloTE-MER89	1.88358e-11	TRUE	Cycling_progenitors	0.102885	0.157562
4.33631e-15	0.867284	0.336	0.201	4.69189e-12	DS_vs_CTL	SoloTE-MER68	1.68713e-14	TRUE	Cycling_progenitors	0.409658	0.608985
4.25632e-50	0.866438	0.992	0.988	4.60533e-47	DS_vs_CTL	SoloTE-L2	8.41805e-49	TRUE	Cycling_progenitors	12.2359	20.428
5.2102e-24	0.862942	0.458	0.339	5.63744e-21	DS_vs_CTL	SoloTE-Tigger15a	2.94418e-23	TRUE	Cycling_progenitors	0.713755	1.13713
1.24882e-47	0.861626	0.639	0.562	1.35122e-44	DS_vs_CTL	SoloTE-L1ME3F	1.93295e-46	TRUE	Cycling_progenitors	1.67943	2.91552
2.17277e-11	0.860261	0.193	0.101	2.35094e-08	DS_vs_CTL	SoloTE-MER31B	6.04302e-11	TRUE	Cycling_progenitors	0.205164	0.27706
8.57346e-11	0.860159	0.178	0.092	9.27648e-08	DS_vs_CTL	SoloTE-MER131	2.18792e-10	TRUE	Cycling_progenitors	0.159704	0.228206
1.97642e-54	0.858832	0.868	0.842	2.13848e-51	DS_vs_CTL	SoloTE-L1PA8	6.70099e-53	TRUE	Cycling_progenitors	4.53595	7.5676
9.75127e-46	0.858675	0.856	0.862	1.05509e-42	DS_vs_CTL	SoloTE-L1MB2	1.30998e-44	TRUE	Cycling_progenitors	3.88423	6.40301
4.90182e-08	0.856207	0.144	0.077	5.30377e-05	DS_vs_CTL	SoloTE-Penelope1-Vert	8.90331e-08	TRUE	Cycling_progenitors	0.168973	0.223293
9.30265e-07	0.852215	0.119	0.063	0.00100655	DS_vs_CTL	SoloTE-MamGyp-int	1.45892e-06	TRUE	Cycling_progenitors	0.120612	0.17886
4.27986e-29	0.851328	0.519	0.385	4.63081e-26	DS_vs_CTL	SoloTE-L1M7	2.8479e-28	TRUE	Cycling_progenitors	0.8512	1.28121
1.02828e-51	0.850257	0.983	0.981	1.1126e-48	DS_vs_CTL	SoloTE-L1ME1	2.5246e-50	TRUE	Cycling_progenitors	11.7908	18.7876
1.33724e-14	0.850109	0.155	0.07	1.44689e-11	DS_vs_CTL	SoloTE-MLT1D-int	4.98489e-14	TRUE	Cycling_progenitors	0.158727	0.227499
1.45781e-63	0.844254	0.988	0.976	1.57735e-60	DS_vs_CTL	SoloTE-L1MB7	1.4828e-61	TRUE	Cycling_progenitors	10.5498	16.4218
1.97546e-53	0.843598	0.734	0.698	2.13745e-50	DS_vs_CTL	SoloTE-L1MA7	5.86054e-52	TRUE	Cycling_progenitors	2.58821	4.09368
3.8779e-67	0.8426	0.993	0.987	4.19589e-64	DS_vs_CTL	SoloTE-L2b	5.52213e-65	TRUE	Cycling_progenitors	13.1462	20.7618
1.73404e-57	0.83843	0.863	0.841	1.87623e-54	DS_vs_CTL	SoloTE-L1MB5	8.2309e-56	TRUE	Cycling_progenitors	4.05285	6.14001
4.02056e-34	0.837647	0.541	0.429	4.35025e-31	DS_vs_CTL	SoloTE-MamRTE1	3.07811e-33	TRUE	Cycling_progenitors	1.1084	1.74805
1.65479e-05	0.837473	0.097	0.052	0.0179048	DS_vs_CTL	SoloTE-LTR85c	2.21885e-05	TRUE	Cycling_progenitors	0.137277	0.208693
5.11683e-13	0.837066	0.281	0.163	5.53641e-10	DS_vs_CTL	SoloTE-Charlie29a	1.61203e-12	TRUE	Cycling_progenitors	0.32753	0.439973
8.14333e-33	0.831406	0.516	0.411	8.81109e-30	DS_vs_CTL	SoloTE-HAL1M8	5.91638e-32	TRUE	Cycling_progenitors	0.901785	1.42368
1.56737e-51	0.829344	0.812	0.77	1.6959e-48	DS_vs_CTL	SoloTE-L1ME3	3.59991e-50	TRUE	Cycling_progenitors	2.89402	4.39091
9.00452e-07	0.828424	0.089	0.043	0.000974289	DS_vs_CTL	SoloTE-X6B-LINE	1.42472e-06	TRUE	Cycling_progenitors	0.0848323	0.119355
9.58029e-22	0.825735	0.473	0.322	1.03659e-18	DS_vs_CTL	SoloTE-THE1B-int	5.16755e-21	TRUE	Cycling_progenitors	0.923728	1.46537
1.84404e-10	0.823965	0.096	0.043	1.99525e-07	DS_vs_CTL	SoloTE-Arthur1A	4.52742e-10	TRUE	Cycling_progenitors	0.10722	0.164458
1.41677e-19	0.819902	0.418	0.254	1.53295e-16	DS_vs_CTL	SoloTE-MLT1J2	6.95683e-19	TRUE	Cycling_progenitors	0.836692	1.01948
3.79461e-09	0.817262	0.121	0.06	4.10577e-06	DS_vs_CTL	SoloTE-LTR83	7.84945e-09	TRUE	Cycling_progenitors	0.0641939	0.0983157
0.000283684	0.816077	0.062	0.032	0.306946	DS_vs_CTL	SoloTE-MER4D0	0.0003372	TRUE	Cycling_progenitors	0.0674973	0.0899379
2.05595e-10	0.815593	0.119	0.056	2.22454e-07	DS_vs_CTL	SoloTE-LTR101-Mam	4.99602e-10	TRUE	Cycling_progenitors	0.0850428	0.14026
5.15434e-06	0.813783	0.078	0.039	0.00557699	DS_vs_CTL	SoloTE-LTR84a	7.32513e-06	TRUE	Cycling_progenitors	0.0699182	0.120569
7.65599e-11	0.812779	0.236	0.135	8.28378e-08	DS_vs_CTL	SoloTE-MamRep137	1.98221e-10	TRUE	Cycling_progenitors	0.253383	0.382827
6.47371e-53	0.811691	0.883	0.864	7.00455e-50	DS_vs_CTL	SoloTE-L1ME2	1.84371e-51	TRUE	Cycling_progenitors	4.39628	7.13742
8.91066e-20	0.811567	0.453	0.324	9.64134e-17	DS_vs_CTL	SoloTE-MER1B	4.40583e-19	TRUE	Cycling_progenitors	0.802481	1.1956
4.79979e-85	0.809955	1	0.997	5.19337e-82	DS_vs_CTL	SoloTE-L2a	3.41745e-82	TRUE	Cycling_progenitors	33.4097	52.634
3.42333e-13	0.809447	0.336	0.212	3.70404e-10	DS_vs_CTL	SoloTE-MSTC	1.11297e-12	TRUE	Cycling_progenitors	0.417901	0.673413
2.73446e-51	0.808628	0.988	0.975	2.95869e-48	DS_vs_CTL	SoloTE-L1MC4	6.08418e-50	TRUE	Cycling_progenitors	9.46729	14.4133
4.47355e-06	0.802351	0.051	0.022	0.00484038	DS_vs_CTL	SoloTE-MamTip3	6.43468e-06	TRUE	Cycling_progenitors	0.0426697	0.0694955
4.70149e-12	0.802136	0.3	0.183	5.08701e-09	DS_vs_CTL	SoloTE-MLT1M	1.38899e-11	TRUE	Cycling_progenitors	0.423209	0.714126
1.69307e-56	0.801218	0.963	0.937	1.8319e-53	DS_vs_CTL	SoloTE-L3	6.69703e-55	TRUE	Cycling_progenitors	6.94463	10.7018
1.94999e-19	0.799437	0.429	0.306	2.10989e-16	DS_vs_CTL	SoloTE-Tigger4b	9.25597e-19	TRUE	Cycling_progenitors	0.647477	0.975577
2.45974e-13	0.798741	0.247	0.136	2.66144e-10	DS_vs_CTL	SoloTE-L1MEg1	8.1838e-13	TRUE	Cycling_progenitors	0.272554	0.395289
1.7813e-15	0.798343	0.188	0.091	1.92737e-12	DS_vs_CTL	SoloTE-L1M3f	7.16546e-15	TRUE	Cycling_progenitors	0.211827	0.346428
2.18057e-08	0.797367	0.178	0.101	2.35938e-05	DS_vs_CTL	SoloTE-Charlie23a	4.14441e-08	TRUE	Cycling_progenitors	0.196796	0.270456
2.56025e-13	0.795308	0.327	0.201	2.77019e-10	DS_vs_CTL	SoloTE-MER94	8.47859e-13	TRUE	Cycling_progenitors	0.416766	0.64379
5.64969e-48	0.795104	0.838	0.816	6.11296e-45	DS_vs_CTL	SoloTE-L1PA13	9.14222e-47	TRUE	Cycling_progenitors	3.74156	5.91492
1.41842e-09	0.791362	0.148	0.077	1.53473e-06	DS_vs_CTL	SoloTE-X6A-LINE	3.09789e-09	TRUE	Cycling_progenitors	0.141144	0.216151
2.07353e-38	0.790666	0.575	0.481	2.24356e-35	DS_vs_CTL	SoloTE-L1ME3E	1.91734e-37	TRUE	Cycling_progenitors	1.26895	1.95196
3.22908e-45	0.790113	0.703	0.613	3.49387e-42	DS_vs_CTL	SoloTE-HAL1ME	4.08904e-44	TRUE	Cycling_progenitors	1.90599	2.92631
2.34312e-19	0.790024	0.469	0.339	2.53526e-16	DS_vs_CTL	SoloTE-HAL1b	1.09757e-18	TRUE	Cycling_progenitors	0.932221	1.37387
6.97573e-05	0.78935	0.057	0.028	0.0754774	DS_vs_CTL	SoloTE-LTR86B1	8.86914e-05	TRUE	Cycling_progenitors	0.0407569	0.0717845
7.67668e-48	0.789121	0.715	0.666	8.30617e-45	DS_vs_CTL	SoloTE-L1PA17	1.21462e-46	TRUE	Cycling_progenitors	2.46421	3.77998
1.80662e-15	0.786504	0.206	0.102	1.95476e-12	DS_vs_CTL	SoloTE-MER63B	7.22648e-15	TRUE	Cycling_progenitors	0.207266	0.335563
5.82045e-05	0.785806	0.081	0.043	0.0629773	DS_vs_CTL	SoloTE-AmnSINE2	7.47451e-05	TRUE	Cycling_progenitors	0.0441269	0.0750001
7.89452e-51	0.784321	1	0.991	8.54187e-48	DS_vs_CTL	SoloTE-L2c	1.65321e-49	TRUE	Cycling_progenitors	21.3678	34.3931
1.64573e-13	0.783055	0.258	0.143	1.78068e-10	DS_vs_CTL	SoloTE-MER44B	5.57982e-13	TRUE	Cycling_progenitors	0.272322	0.480506
1.66143e-06	0.781021	0.125	0.069	0.00179767	DS_vs_CTL	SoloTE-LTR70	2.52226e-06	TRUE	Cycling_progenitors	0.0772543	0.114881
1.81852e-08	0.779417	0.198	0.116	1.96764e-05	DS_vs_CTL	SoloTE-MER91A	3.48999e-08	TRUE	Cycling_progenitors	0.192412	0.320452
3.88318e-15	0.778747	0.378	0.243	4.2016e-12	DS_vs_CTL	SoloTE-L1M8	1.51913e-14	TRUE	Cycling_progenitors	0.790072	1.18881
6.63445e-12	0.777751	0.254	0.146	7.17847e-09	DS_vs_CTL	SoloTE-LTR78	1.91244e-11	TRUE	Cycling_progenitors	0.302114	0.49403
1.78465e-53	0.777394	0.863	0.865	1.93099e-50	DS_vs_CTL	SoloTE-L1MB4	5.52465e-52	TRUE	Cycling_progenitors	4.26255	6.64909
5.46149e-26	0.776789	0.521	0.415	5.90933e-23	DS_vs_CTL	SoloTE-L1ME3C	3.38138e-25	TRUE	Cycling_progenitors	0.846141	1.26554
2.25736e-11	0.776587	0.213	0.117	2.44246e-08	DS_vs_CTL	SoloTE-LFSINE-Vert	6.25386e-11	TRUE	Cycling_progenitors	0.184061	0.311056
1.41094e-15	0.77555	0.406	0.274	1.52664e-12	DS_vs_CTL	SoloTE-L1MEb	5.7079e-15	TRUE	Cycling_progenitors	0.564729	0.840156
2.75091e-11	0.77399	0.183	0.095	2.97649e-08	DS_vs_CTL	SoloTE-MLT2B3	7.53326e-11	TRUE	Cycling_progenitors	0.194258	0.293121
4.17129e-13	0.772588	0.343	0.229	4.51334e-10	DS_vs_CTL	SoloTE-Tigger19a	1.33782e-12	TRUE	Cycling_progenitors	0.446773	0.699575
1.10447e-13	0.772576	0.369	0.243	1.19503e-10	DS_vs_CTL	SoloTE-L1MEj	3.83601e-13	TRUE	Cycling_progenitors	0.511899	0.855615
2.11849e-45	0.769369	0.684	0.604	2.2922e-42	DS_vs_CTL	SoloTE-L1ME4c	2.79326e-44	TRUE	Cycling_progenitors	1.92515	2.83934
2.84136e-13	0.767206	0.263	0.148	3.07435e-10	DS_vs_CTL	SoloTE-MLT1J1	9.3228e-13	TRUE	Cycling_progenitors	0.332393	0.518483
1.43644e-14	0.766066	0.397	0.271	1.55423e-11	DS_vs_CTL	SoloTE-L1MCc	5.32682e-14	TRUE	Cycling_progenitors	0.705349	1.12822
6.67288e-15	0.765632	0.391	0.266	7.22006e-12	DS_vs_CTL	SoloTE-Tigger7	2.52718e-14	TRUE	Cycling_progenitors	0.596324	0.803797
3.98912e-13	0.760302	0.198	0.104	4.31623e-10	DS_vs_CTL	SoloTE-MER31A	1.28518e-12	TRUE	Cycling_progenitors	0.186918	0.251644
1.81008e-46	0.758148	0.961	0.946	1.95851e-43	DS_vs_CTL	SoloTE-L1MB8	2.57755e-45	TRUE	Cycling_progenitors	7.0022	10.2539
2.14476e-19	0.757372	0.47	0.348	2.32063e-16	DS_vs_CTL	SoloTE-L1ME5	1.0113e-18	TRUE	Cycling_progenitors	0.731216	1.28463
1.75512e-10	0.756813	0.1	0.047	1.89904e-07	DS_vs_CTL	SoloTE-Tigger12c	4.35416e-10	TRUE	Cycling_progenitors	0.0977909	0.158763
3.6755e-20	0.756683	0.96	0.959	3.97689e-17	DS_vs_CTL	SoloTE-L1PA4	1.84293e-19	TRUE	Cycling_progenitors	11.1711	16.2987
3.59572e-10	0.753523	0.226	0.131	3.89057e-07	DS_vs_CTL	SoloTE-MER4B	8.5055e-10	TRUE	Cycling_progenitors	0.251236	0.338267
5.98567e-16	0.753506	0.405	0.279	6.4765e-13	DS_vs_CTL	SoloTE-MER21B	2.44931e-15	TRUE	Cycling_progenitors	0.621872	0.961212
1.36363e-09	0.752694	0.13	0.066	1.47544e-06	DS_vs_CTL	SoloTE-MLT2F	2.98739e-09	TRUE	Cycling_progenitors	0.126734	0.219043
9.34022e-55	0.752125	0.747	0.688	1.01061e-51	DS_vs_CTL	SoloTE-MER2	3.32512e-53	TRUE	Cycling_progenitors	2.10353	2.97195
2.31516e-11	0.751283	0.118	0.056	2.505e-08	DS_vs_CTL	SoloTE-LTR85a	6.38913e-11	TRUE	Cycling_progenitors	0.133621	0.210596
5.27635e-49	0.750868	0.823	0.795	5.70901e-46	DS_vs_CTL	SoloTE-L1ME2z	9.39191e-48	TRUE	Cycling_progenitors	2.72539	3.99764
9.82203e-68	0.749941	0.938	0.893	1.06274e-64	DS_vs_CTL	SoloTE-L1MEg	1.74832e-65	TRUE	Cycling_progenitors	5.84549	8.39954
2.84658e-47	0.747167	0.9	0.882	3.08e-44	DS_vs_CTL	SoloTE-L1ME3A	4.22242e-46	TRUE	Cycling_progenitors	4.42598	6.7247
2.116e-13	0.746596	0.316	0.189	2.28951e-10	DS_vs_CTL	SoloTE-Charlie18a	7.0732e-13	TRUE	Cycling_progenitors	0.390705	0.608364
1.04965e-13	0.745	0.304	0.178	1.13572e-10	DS_vs_CTL	SoloTE-BLACKJACK	3.66349e-13	TRUE	Cycling_progenitors	0.319657	0.455314
4.37872e-44	0.742075	0.743	0.683	4.73778e-41	DS_vs_CTL	SoloTE-L1PB4	5.02847e-43	TRUE	Cycling_progenitors	2.55988	3.90718
2.36041e-10	0.741645	0.083	0.036	2.55396e-07	DS_vs_CTL	SoloTE-HERVIP10F-int	5.71636e-10	TRUE	Cycling_progenitors	0.104722	0.156402
1.01476e-10	0.740548	0.247	0.145	1.09797e-07	DS_vs_CTL	SoloTE-HERVK9-int	2.5621e-10	TRUE	Cycling_progenitors	0.390456	0.466287
1.24343e-12	0.736842	0.15	0.075	1.34539e-09	DS_vs_CTL	SoloTE-MSTD-int	3.81603e-12	TRUE	Cycling_progenitors	0.153046	0.218853
4.45446e-44	0.736335	0.833	0.796	4.81973e-41	DS_vs_CTL	SoloTE-L1MC2	5.03425e-43	TRUE	Cycling_progenitors	3.24506	4.94581
7.33706e-45	0.734529	0.878	0.861	7.9387e-42	DS_vs_CTL	SoloTE-L1MD2	8.70665e-44	TRUE	Cycling_progenitors	4.83091	7.06959
3.85706e-06	0.73371	0.05	0.023	0.00417334	DS_vs_CTL	SoloTE-LTR18B	5.62752e-06	TRUE	Cycling_progenitors	0.0381092	0.0435864
3.69782e-12	0.733637	0.333	0.212	4.00104e-09	DS_vs_CTL	SoloTE-Tigger3c	1.10161e-11	TRUE	Cycling_progenitors	0.476607	0.657048
2.51087e-09	0.73306	0.223	0.132	2.71676e-06	DS_vs_CTL	SoloTE-MER51A	5.36858e-09	TRUE	Cycling_progenitors	0.252428	0.316456
3.32636e-19	0.731707	0.501	0.358	3.59912e-16	DS_vs_CTL	SoloTE-Charlie7	1.54795e-18	TRUE	Cycling_progenitors	0.990411	1.33874
1.10396e-08	0.730496	0.18	0.102	1.19448e-05	DS_vs_CTL	SoloTE-Tigger5b	2.16534e-08	TRUE	Cycling_progenitors	0.23901	0.331127
1.79913e-19	0.726274	0.478	0.357	1.94666e-16	DS_vs_CTL	SoloTE-THE1C	8.5972e-19	TRUE	Cycling_progenitors	1.17959	1.8031
9.69033e-06	0.724507	0.111	0.063	0.0104849	DS_vs_CTL	SoloTE-MER90	1.33712e-05	TRUE	Cycling_progenitors	0.139703	0.188923
2.36388e-11	0.72436	0.283	0.172	2.55772e-08	DS_vs_CTL	SoloTE-L1M2a	6.49839e-11	TRUE	Cycling_progenitors	0.477723	0.631257
2.84238e-09	0.724136	0.077	0.035	3.07546e-06	DS_vs_CTL	SoloTE-MER91C	6.05921e-09	TRUE	Cycling_progenitors	0.0619536	0.0988527
4.00384e-16	0.723948	0.253	0.133	4.33216e-13	DS_vs_CTL	SoloTE-MER119	1.6574e-15	TRUE	Cycling_progenitors	0.307066	0.518802
7.84133e-23	0.722126	0.52	0.4	8.48432e-20	DS_vs_CTL	SoloTE-L3b	4.36174e-22	TRUE	Cycling_progenitors	1.1513	1.77614
4.99757e-14	0.722104	0.399	0.264	5.40738e-11	DS_vs_CTL	SoloTE-HSMAR2	1.82476e-13	TRUE	Cycling_progenitors	0.658448	0.979539
1.40693e-11	0.71899	0.207	0.116	1.52229e-08	DS_vs_CTL	SoloTE-THE1A-int	3.99096e-11	TRUE	Cycling_progenitors	0.284282	0.478383
3.80713e-45	0.718622	0.73	0.654	4.11931e-42	DS_vs_CTL	SoloTE-MLT1C	4.67358e-44	TRUE	Cycling_progenitors	2.75013	3.86929
3.27353e-45	0.718219	0.96	0.931	3.54196e-42	DS_vs_CTL	SoloTE-L1ME4a	4.08904e-44	TRUE	Cycling_progenitors	7.29982	10.4188
4.86188e-12	0.716552	0.154	0.079	5.26056e-09	DS_vs_CTL	SoloTE-L1M3e	1.43044e-11	TRUE	Cycling_progenitors	0.222306	0.287384
4.89843e-09	0.716456	0.192	0.11	5.3001e-06	DS_vs_CTL	SoloTE-Charlie16a	9.99335e-09	TRUE	Cycling_progenitors	0.222019	0.309655
3.14131e-09	0.716293	0.122	0.061	3.3989e-06	DS_vs_CTL	SoloTE-Tigger14a	6.63684e-09	TRUE	Cycling_progenitors	0.134869	0.185495
4.93661e-39	0.71532	0.975	0.971	5.34141e-36	DS_vs_CTL	SoloTE-L1MEc	4.68649e-38	TRUE	Cycling_progenitors	8.32909	12.9172
1.79655e-19	0.715082	0.49	0.37	1.94387e-16	DS_vs_CTL	SoloTE-MER103C	8.5972e-19	TRUE	Cycling_progenitors	0.857053	1.31118
1.00549e-06	0.713608	0.069	0.033	0.00108794	DS_vs_CTL	SoloTE-LTR32	1.57342e-06	TRUE	Cycling_progenitors	0.0841038	0.118625
1.10703e-38	0.712131	0.651	0.613	1.19781e-35	DS_vs_CTL	SoloTE-L1MB1	1.03711e-37	TRUE	Cycling_progenitors	1.99731	3.43557
3.43911e-12	0.711106	0.18	0.095	3.72112e-09	DS_vs_CTL	SoloTE-L1PBa1	1.02884e-11	TRUE	Cycling_progenitors	0.216996	0.293773
4.74996e-13	0.710036	0.209	0.113	5.13946e-10	DS_vs_CTL	SoloTE-Tigger16a	1.50981e-12	TRUE	Cycling_progenitors	0.2142	0.362725
6.79146e-26	0.707891	0.546	0.444	7.34836e-23	DS_vs_CTL	SoloTE-MER21C	4.13292e-25	TRUE	Cycling_progenitors	1.15627	1.6344
3.87706e-45	0.706308	0.88	0.842	4.19498e-42	DS_vs_CTL	SoloTE-L1ME3G	4.67876e-44	TRUE	Cycling_progenitors	4.11562	6.00776
1.17075e-25	0.704585	0.581	0.469	1.26675e-22	DS_vs_CTL	SoloTE-Tigger4a	7.0048e-25	TRUE	Cycling_progenitors	1.07872	1.4932
1.83274e-10	0.704202	0.16	0.084	1.98302e-07	DS_vs_CTL	SoloTE-Tigger20a	4.51526e-10	TRUE	Cycling_progenitors	0.161106	0.271865
1.62236e-07	0.703375	0.133	0.074	0.00017554	DS_vs_CTL	SoloTE-MER52A	2.77673e-07	TRUE	Cycling_progenitors	0.136707	0.20353
5.11866e-38	0.701235	0.913	0.899	5.53839e-35	DS_vs_CTL	SoloTE-L1MEf	4.67242e-37	TRUE	Cycling_progenitors	4.73008	6.94582
2.112e-06	0.700055	0.094	0.051	0.00228518	DS_vs_CTL	SoloTE-MER34B	3.17916e-06	TRUE	Cycling_progenitors	0.127162	0.147911
9.60722e-12	0.698678	0.209	0.117	1.0395e-08	DS_vs_CTL	SoloTE-MLT2A2	2.7582e-11	TRUE	Cycling_progenitors	0.257904	0.35158
1.17773e-09	0.697851	0.159	0.087	1.2743e-06	DS_vs_CTL	SoloTE-Helitron3Na-Mam	2.60417e-09	TRUE	Cycling_progenitors	0.199157	0.274005
0.00220177	0.696213	0.079	0.047	1	DS_vs_CTL	SoloTE-LOR1b	0.00243048	TRUE	Cycling_progenitors	0.111092	0.149292
2.72152e-37	0.6955	0.637	0.579	2.94468e-34	DS_vs_CTL	SoloTE-THE1D	2.39225e-36	TRUE	Cycling_progenitors	1.75155	2.6216
7.85596e-42	0.69483	0.95	0.938	8.50015e-39	DS_vs_CTL	SoloTE-L1MEd	8.34842e-41	TRUE	Cycling_progenitors	6.59295	9.71909
2.48239e-10	0.694031	0.217	0.125	2.68594e-07	DS_vs_CTL	SoloTE-L1MDb	5.95104e-10	TRUE	Cycling_progenitors	0.255358	0.373532
3.01969e-06	0.69339	0.124	0.071	0.0032673	DS_vs_CTL	SoloTE-MER89-int	4.46989e-06	TRUE	Cycling_progenitors	0.137001	0.162691
8.97054e-10	0.692598	0.26	0.16	9.70612e-07	DS_vs_CTL	SoloTE-Tigger3	2.01483e-09	TRUE	Cycling_progenitors	0.309616	0.40137
2.48178e-35	0.690732	0.786	0.798	2.68529e-32	DS_vs_CTL	SoloTE-L1PA15	1.94179e-34	TRUE	Cycling_progenitors	3.18701	5.39745
4.17544e-11	0.688204	0.181	0.097	4.51783e-08	DS_vs_CTL	SoloTE-MLT1E3	1.1093e-10	TRUE	Cycling_progenitors	0.182224	0.28131
0.00219329	0.688015	0.089	0.055	1	DS_vs_CTL	SoloTE-LTR24C	0.00242488	TRUE	Cycling_progenitors	0.125958	0.135494
5.93452e-41	0.687564	0.776	0.764	6.42115e-38	DS_vs_CTL	SoloTE-L1ME3Cz	6.03625e-40	TRUE	Cycling_progenitors	3.07265	4.5478
1.31848e-42	0.683882	0.819	0.786	1.42659e-39	DS_vs_CTL	SoloTE-L1M2	1.44424e-41	TRUE	Cycling_progenitors	3.92321	5.39488
6.60067e-14	0.682822	0.424	0.3	7.14192e-11	DS_vs_CTL	SoloTE-L1MEh	2.36165e-13	TRUE	Cycling_progenitors	0.710334	0.987472
0.000263316	0.67511	0.106	0.065	0.284908	DS_vs_CTL	SoloTE-HERVH48-int	0.000314038	TRUE	Cycling_progenitors	0.2415	0.33252
3.32876e-11	0.674768	0.342	0.223	3.60171e-08	DS_vs_CTL	SoloTE-MER102c	8.94368e-11	TRUE	Cycling_progenitors	0.450741	0.661238
2.21551e-09	0.674228	0.102	0.049	2.39718e-06	DS_vs_CTL	SoloTE-X7B-LINE	4.76568e-09	TRUE	Cycling_progenitors	0.087232	0.119527
7.36203e-08	0.674191	0.135	0.076	7.96571e-05	DS_vs_CTL	SoloTE-MER92B	1.30069e-07	TRUE	Cycling_progenitors	0.124766	0.173202
9.8641e-42	0.673794	0.8	0.763	1.0673e-38	DS_vs_CTL	SoloTE-L1MCa	1.03283e-40	TRUE	Cycling_progenitors	3.33096	4.72708
9.38563e-24	0.671601	0.534	0.448	1.01552e-20	DS_vs_CTL	SoloTE-L1M4a1	5.26186e-23	TRUE	Cycling_progenitors	1.17535	1.62632
2.79249e-20	0.668942	0.49	0.412	3.02148e-17	DS_vs_CTL	SoloTE-MIR1-Amn	1.42018e-19	TRUE	Cycling_progenitors	1.00296	1.42615
7.64001e-07	0.668934	0.142	0.082	0.00082665	DS_vs_CTL	SoloTE-Zaphod3	1.22792e-06	TRUE	Cycling_progenitors	0.137711	0.187252
4.57774e-08	0.668599	0.285	0.194	4.95311e-05	DS_vs_CTL	SoloTE-Charlie19a	8.34379e-08	TRUE	Cycling_progenitors	0.324952	0.435723
1.63545e-16	0.668405	0.475	0.359	1.76956e-13	DS_vs_CTL	SoloTE-MamSINE1	6.89019e-16	TRUE	Cycling_progenitors	0.834092	1.13486
2.11715e-46	0.667605	0.951	0.934	2.29075e-43	DS_vs_CTL	SoloTE-L1ME4b	2.9557e-45	TRUE	Cycling_progenitors	6.10966	8.50414
2.34086e-17	0.667298	0.498	0.369	2.53281e-14	DS_vs_CTL	SoloTE-MLT1I	1.01012e-16	TRUE	Cycling_progenitors	1.05931	1.53366
8.03782e-06	0.667059	0.06	0.029	0.00869692	DS_vs_CTL	SoloTE-LTR106-Mam	1.11995e-05	TRUE	Cycling_progenitors	0.109992	0.112492
1.38467e-06	0.665665	0.105	0.058	0.00149821	DS_vs_CTL	SoloTE-Kanga11a	2.12018e-06	TRUE	Cycling_progenitors	0.150663	0.193887
2.02188e-12	0.660664	0.232	0.132	2.18767e-09	DS_vs_CTL	SoloTE-Tigger10	6.15204e-12	TRUE	Cycling_progenitors	0.205166	0.301228
1.22506e-06	0.659747	0.115	0.064	0.00132552	DS_vs_CTL	SoloTE-LTR33A-	1.90032e-06	TRUE	Cycling_progenitors	0.184341	0.234935
2.44038e-12	0.659723	0.081	0.033	2.64049e-09	DS_vs_CTL	SoloTE-MSTA1	7.39382e-12	TRUE	Cycling_progenitors	0.0596423	0.0945747
1.73163e-21	0.65959	0.487	0.412	1.87362e-18	DS_vs_CTL	SoloTE-MSTD	9.2009e-21	TRUE	Cycling_progenitors	1.0024	1.59056
4.23583e-10	0.659293	0.323	0.213	4.58317e-07	DS_vs_CTL	SoloTE-MER47A	9.88823e-10	TRUE	Cycling_progenitors	0.41008	0.629941
3.31119e-11	0.657734	0.229	0.133	3.58271e-08	DS_vs_CTL	SoloTE-Arthur1B	8.93018e-11	TRUE	Cycling_progenitors	0.307488	0.422844
5.16113e-32	0.656576	0.671	0.593	5.58434e-29	DS_vs_CTL	SoloTE-MLT1J	3.67472e-31	TRUE	Cycling_progenitors	1.78782	2.48318
3.64235e-10	0.656156	0.3	0.192	3.94102e-07	DS_vs_CTL	SoloTE-HERVL-int	8.58726e-10	TRUE	Cycling_progenitors	0.355042	0.560046
4.52267e-37	0.655992	0.819	0.807	4.89353e-34	DS_vs_CTL	SoloTE-L1PREC2	3.87969e-36	TRUE	Cycling_progenitors	3.67077	5.50929
4.25781e-12	0.655804	0.249	0.145	4.60695e-09	DS_vs_CTL	SoloTE-MLT1G	1.26315e-11	TRUE	Cycling_progenitors	0.323835	0.474366
1.83033e-10	0.655773	0.192	0.108	1.98042e-07	DS_vs_CTL	SoloTE-Charlie20a	4.51526e-10	TRUE	Cycling_progenitors	0.175253	0.254395
6.54234e-27	0.65531	0.617	0.523	7.07881e-24	DS_vs_CTL	SoloTE-Tigger2	4.12225e-26	TRUE	Cycling_progenitors	1.41416	1.95067
2.13066e-06	0.653124	0.051	0.023	0.00230537	DS_vs_CTL	SoloTE-MER83	3.20048e-06	TRUE	Cycling_progenitors	0.0843772	0.0927916
1.50616e-12	0.650728	0.186	0.101	1.62966e-09	DS_vs_CTL	SoloTE-Charlie7a	4.60251e-12	TRUE	Cycling_progenitors	0.172388	0.254745
9.38955e-34	0.650374	0.821	0.804	1.01595e-30	DS_vs_CTL	SoloTE-L1MA8	7.11208e-33	TRUE	Cycling_progenitors	3.4235	5.23831
2.80832e-11	0.647645	0.322	0.204	3.0386e-08	DS_vs_CTL	SoloTE-L4-B-Mam	7.65954e-11	TRUE	Cycling_progenitors	0.507091	0.708445
6.40709e-59	0.646273	0.996	0.993	6.93247e-56	DS_vs_CTL	SoloTE-MIR	3.50911e-57	TRUE	Cycling_progenitors	20.7015	29.6986
3.36965e-09	0.646096	0.076	0.035	3.64596e-06	DS_vs_CTL	SoloTE-LTR16E1	7.09819e-09	TRUE	Cycling_progenitors	0.0788575	0.122219
2.60538e-45	0.645338	0.798	0.743	2.81902e-42	DS_vs_CTL	SoloTE-MER5B	3.37278e-44	TRUE	Cycling_progenitors	2.68071	3.76484
1.61125e-29	0.644202	0.964	0.959	1.74338e-26	DS_vs_CTL	SoloTE-L1MC5a	1.08228e-28	TRUE	Cycling_progenitors	7.00684	10.026
2.12118e-37	0.64256	0.989	0.978	2.29512e-34	DS_vs_CTL	SoloTE-MIRc	1.88785e-36	TRUE	Cycling_progenitors	10.9274	15.4738
4.76527e-59	0.642053	1	0.995	5.15602e-56	DS_vs_CTL	SoloTE-MIRb	2.84233e-57	TRUE	Cycling_progenitors	24.669	35.1648
2.80753e-05	0.640626	0.096	0.055	0.0303775	DS_vs_CTL	SoloTE-Kanga1d	3.70179e-05	TRUE	Cycling_progenitors	0.105435	0.134547
8.80033e-11	0.640098	0.103	0.049	9.52195e-08	DS_vs_CTL	SoloTE-MER57-int	2.2378e-10	TRUE	Cycling_progenitors	0.12584	0.206683
4.25654e-42	0.639644	0.96	0.957	4.60558e-39	DS_vs_CTL	SoloTE-L1MC5	4.59191e-41	TRUE	Cycling_progenitors	6.4992	9.17715
1.21932e-33	0.639256	0.665	0.594	1.31931e-30	DS_vs_CTL	SoloTE-MER5A1	9.1385e-33	TRUE	Cycling_progenitors	1.73886	2.56971
0.114376	0.636546	0.053	0.037	1	DS_vs_CTL	SoloTE-Eulor5A	0.116837	FALSE	Cycling_progenitors	0.0205128	0.0230358
2.9491e-28	0.636477	0.851	0.84	3.19093e-25	DS_vs_CTL	SoloTE-L1PA10	1.89168e-27	TRUE	Cycling_progenitors	4.3745	6.41766
1.69876e-05	0.635803	0.075	0.04	0.0183806	DS_vs_CTL	SoloTE-Arthur1C	2.27353e-05	TRUE	Cycling_progenitors	0.104153	0.137347
3.94365e-10	0.631567	0.133	0.071	4.26703e-07	DS_vs_CTL	SoloTE-MER74B	9.23644e-10	TRUE	Cycling_progenitors	0.12656	0.194948
0.000220473	0.631522	0.05	0.027	0.238552	DS_vs_CTL	SoloTE-LTR26	0.000264271	TRUE	Cycling_progenitors	0.059514	0.0715268
9.76014e-05	0.6273	0.072	0.04	0.105605	DS_vs_CTL	SoloTE-MLT1B-int	0.000122561	TRUE	Cycling_progenitors	0.0782173	0.115374
3.42001e-06	0.626353	0.155	0.094	0.00370045	DS_vs_CTL	SoloTE-AluYi6-4d	5.02072e-06	TRUE	Cycling_progenitors	0.177295	0.175146
5.61859e-13	0.625495	0.37	0.238	6.07931e-10	DS_vs_CTL	SoloTE-MSTA-int	1.75458e-12	TRUE	Cycling_progenitors	0.558649	0.838749
8.71913e-20	0.625348	0.582	0.452	9.4341e-17	DS_vs_CTL	SoloTE-Charlie4z	4.34127e-19	TRUE	Cycling_progenitors	1.12456	1.42487
2.14034e-06	0.62476	0.05	0.021	0.00231584	DS_vs_CTL	SoloTE-MLT1E	3.20825e-06	TRUE	Cycling_progenitors	0.060627	0.099309
3.42289e-10	0.623819	0.274	0.171	3.70356e-07	DS_vs_CTL	SoloTE-Tigger18a	8.15082e-10	TRUE	Cycling_progenitors	0.323825	0.442332
5.45663e-13	0.623118	0.42	0.284	5.90408e-10	DS_vs_CTL	SoloTE-Tigger4	1.71151e-12	TRUE	Cycling_progenitors	0.645329	0.849707
4.58205e-08	0.622885	0.189	0.114	4.95778e-05	DS_vs_CTL	SoloTE-MER106B	8.34379e-08	TRUE	Cycling_progenitors	0.211905	0.288158
3.67919e-11	0.621366	0.119	0.061	3.98089e-08	DS_vs_CTL	SoloTE-MER68B	9.84807e-11	TRUE	Cycling_progenitors	0.106656	0.168422
5.72333e-05	0.620249	0.103	0.061	0.0619264	DS_vs_CTL	SoloTE-MER6B	7.36891e-05	TRUE	Cycling_progenitors	0.109827	0.154654
3.58503e-09	0.617591	0.144	0.08	3.879e-06	DS_vs_CTL	SoloTE-MamGypsy2-I	7.46356e-09	TRUE	Cycling_progenitors	0.154518	0.244141
5.87129e-16	0.616816	0.517	0.421	6.35274e-13	DS_vs_CTL	SoloTE-L1MA10	2.41639e-15	TRUE	Cycling_progenitors	0.981322	1.69512
2.02693e-43	0.616634	0.775	0.742	2.19314e-40	DS_vs_CTL	SoloTE-MER20	2.25496e-42	TRUE	Cycling_progenitors	2.66442	3.96409
2.43768e-32	0.615484	0.724	0.643	2.63757e-29	DS_vs_CTL	SoloTE-MLT1A0	1.75316e-31	TRUE	Cycling_progenitors	2.26934	3.13748
1.00487e-36	0.615375	0.76	0.726	1.08727e-33	DS_vs_CTL	SoloTE-THE1B	8.31942e-36	TRUE	Cycling_progenitors	3.99338	5.15998
2.05246e-13	0.613655	0.143	0.072	2.22076e-10	DS_vs_CTL	SoloTE-MER115	6.89315e-13	TRUE	Cycling_progenitors	0.178161	0.285257
5.94837e-08	0.613574	0.085	0.043	6.43614e-05	DS_vs_CTL	SoloTE-LTR16B1	1.05617e-07	TRUE	Cycling_progenitors	0.0789913	0.125151
1.1165e-07	0.613542	0.25	0.163	0.000120805	DS_vs_CTL	SoloTE-OldhAT1	1.94363e-07	TRUE	Cycling_progenitors	0.357101	0.516156
4.10531e-06	0.610815	0.094	0.053	0.00444195	DS_vs_CTL	SoloTE-Tigger3d	5.96527e-06	TRUE	Cycling_progenitors	0.103281	0.137088
5.29593e-08	0.610541	0.099	0.052	5.7302e-05	DS_vs_CTL	SoloTE-MLT1A-int	9.49799e-08	TRUE	Cycling_progenitors	0.11017	0.152439
1.25106e-11	0.609995	0.102	0.048	1.35364e-08	DS_vs_CTL	SoloTE-MLT2B2	3.56301e-11	TRUE	Cycling_progenitors	0.146069	0.250657
8.26668e-09	0.609784	0.142	0.078	8.94455e-06	DS_vs_CTL	SoloTE-LTR10C	1.63952e-08	TRUE	Cycling_progenitors	0.196611	0.254102
3.03736e-10	0.609686	0.227	0.137	3.28643e-07	DS_vs_CTL	SoloTE-L1M3a	7.25706e-10	TRUE	Cycling_progenitors	0.256697	0.338376
1.91441e-11	0.60924	0.392	0.267	2.07139e-08	DS_vs_CTL	SoloTE-Charlie4a	5.34534e-11	TRUE	Cycling_progenitors	0.548378	0.74581
1.27801e-08	0.608653	0.168	0.098	1.38281e-05	DS_vs_CTL	SoloTE-LTR54	2.48619e-08	TRUE	Cycling_progenitors	0.257588	0.322426
1.46799e-13	0.60727	0.196	0.107	1.58837e-10	DS_vs_CTL	SoloTE-LTR40a	5.001e-13	TRUE	Cycling_progenitors	0.244894	0.350155
3.2959e-07	0.606921	0.088	0.047	0.000356616	DS_vs_CTL	SoloTE-L1M3d	5.44473e-07	TRUE	Cycling_progenitors	0.0952977	0.125099
8.86773e-10	0.606551	0.113	0.058	9.59489e-07	DS_vs_CTL	SoloTE-LTR104-Mam	2.00439e-09	TRUE	Cycling_progenitors	0.134575	0.206351
3.28967e-20	0.605165	0.554	0.462	3.55942e-17	DS_vs_CTL	SoloTE-MSTB	1.66117e-19	TRUE	Cycling_progenitors	1.28095	1.72497
9.67118e-25	0.603994	0.603	0.526	1.04642e-21	DS_vs_CTL	SoloTE-L1MEi	5.64416e-24	TRUE	Cycling_progenitors	1.44709	2.10421
5.32222e-36	0.603438	0.974	0.958	5.75864e-33	DS_vs_CTL	SoloTE-MIR3	4.25778e-35	TRUE	Cycling_progenitors	7.97055	11.2343
6.59298e-09	0.602781	0.207	0.125	7.1336e-06	DS_vs_CTL	SoloTE-MamRep38	1.32231e-08	TRUE	Cycling_progenitors	0.313631	0.40109
6.1035e-35	0.60187	0.751	0.687	6.60399e-32	DS_vs_CTL	SoloTE-L1MC	4.72358e-34	TRUE	Cycling_progenitors	2.32513	3.11464
4.4447e-08	0.600493	0.315	0.217	4.80917e-05	DS_vs_CTL	SoloTE-MLT1N2	8.13529e-08	TRUE	Cycling_progenitors	0.531885	0.721087
0.000207281	0.599992	0.081	0.047	0.224278	DS_vs_CTL	SoloTE-HUERS-P1-int	0.00024972	TRUE	Cycling_progenitors	0.114853	0.137755
7.98271e-07	0.599831	0.097	0.053	0.000863729	DS_vs_CTL	SoloTE-HERVK22-int	1.27723e-06	TRUE	Cycling_progenitors	0.0900586	0.125516
1.00216e-09	0.598697	0.135	0.073	1.08434e-06	DS_vs_CTL	SoloTE-MSTB2	2.2298e-09	TRUE	Cycling_progenitors	0.174476	0.255032
3.53199e-10	0.597311	0.39	0.273	3.82161e-07	DS_vs_CTL	SoloTE-Charlie1	8.38259e-10	TRUE	Cycling_progenitors	0.577154	0.759386
8.0141e-10	0.595998	0.265	0.167	8.67126e-07	DS_vs_CTL	SoloTE-L1MCb	1.81721e-09	TRUE	Cycling_progenitors	0.425126	0.558034
2.18346e-35	0.595814	0.801	0.787	2.3625e-32	DS_vs_CTL	SoloTE-L1ME3B	1.72736e-34	TRUE	Cycling_progenitors	3.24343	4.65334
1.22939e-07	0.595604	0.188	0.116	0.00013302	DS_vs_CTL	SoloTE-LTR33A	2.12458e-07	TRUE	Cycling_progenitors	0.123746	0.173935
4.60197e-06	0.595599	0.105	0.061	0.00497933	DS_vs_CTL	SoloTE-MER39B	6.59277e-06	TRUE	Cycling_progenitors	0.154187	0.20377
5.73853e-08	0.59473	0.171	0.101	6.20909e-05	DS_vs_CTL	SoloTE-L1P5	1.02146e-07	TRUE	Cycling_progenitors	0.353272	0.343703
0.000166011	0.593522	0.064	0.036	0.179623	DS_vs_CTL	SoloTE-Charlie17b	0.00020205	TRUE	Cycling_progenitors	0.059632	0.0792467
4.49047e-11	0.592806	0.184	0.105	4.85869e-08	DS_vs_CTL	SoloTE-Kanga1c	1.18856e-10	TRUE	Cycling_progenitors	0.187538	0.255838
8.03803e-15	0.592089	0.511	0.407	8.69715e-12	DS_vs_CTL	SoloTE-MER112	3.01215e-14	TRUE	Cycling_progenitors	0.953395	1.28469
4.76829e-09	0.588802	0.162	0.094	5.15929e-06	DS_vs_CTL	SoloTE-MER77	9.75581e-09	TRUE	Cycling_progenitors	0.228918	0.293264
1.96701e-10	0.588099	0.133	0.072	2.1283e-07	DS_vs_CTL	SoloTE-Kanga1b	4.79626e-10	TRUE	Cycling_progenitors	0.0839485	0.118088
9.61765e-05	0.584622	0.108	0.066	0.104063	DS_vs_CTL	SoloTE-MER34A1	0.000121199	TRUE	Cycling_progenitors	0.0893393	0.123363
3.2721e-15	0.583455	0.182	0.098	3.54042e-12	DS_vs_CTL	SoloTE-MER6	1.2943e-14	TRUE	Cycling_progenitors	0.161998	0.260757
1.94481e-25	0.58276	0.945	0.951	2.10429e-22	DS_vs_CTL	SoloTE-L1PB1	1.15392e-24	TRUE	Cycling_progenitors	6.4654	9.56617
2.85112e-09	0.582496	0.138	0.077	3.08491e-06	DS_vs_CTL	SoloTE-MER105	6.05969e-09	TRUE	Cycling_progenitors	0.119201	0.169106
6.85278e-21	0.580903	0.609	0.525	7.4147e-18	DS_vs_CTL	SoloTE-L1ME3D	3.58763e-20	TRUE	Cycling_progenitors	1.53217	2.15001
6.58437e-12	0.5809	0.135	0.071	7.12429e-09	DS_vs_CTL	SoloTE-MER58D	1.90572e-11	TRUE	Cycling_progenitors	0.175188	0.197042
3.80345e-09	0.580122	0.32	0.214	4.11534e-06	DS_vs_CTL	SoloTE-Cheshire	7.84945e-09	TRUE	Cycling_progenitors	0.414525	0.565417
5.79841e-10	0.580107	0.227	0.139	6.27388e-07	DS_vs_CTL	SoloTE-MER44C	1.33176e-09	TRUE	Cycling_progenitors	0.294822	0.423081
2.11231e-07	0.578545	0.082	0.042	0.000228552	DS_vs_CTL	SoloTE-MER4CL34	3.57237e-07	TRUE	Cycling_progenitors	0.0853816	0.110622
5.04761e-08	0.57535	0.185	0.112	5.46151e-05	DS_vs_CTL	SoloTE-MER45A	9.12157e-08	TRUE	Cycling_progenitors	0.251802	0.339698
8.121e-11	0.574608	0.275	0.173	8.78692e-08	DS_vs_CTL	SoloTE-MER5C	2.08742e-10	TRUE	Cycling_progenitors	0.392486	0.505322
3.94928e-08	0.573954	0.195	0.119	4.27312e-05	DS_vs_CTL	SoloTE-MLT2B1	7.36095e-08	TRUE	Cycling_progenitors	0.28647	0.42547
6.50368e-10	0.56582	0.266	0.169	7.03698e-07	DS_vs_CTL	SoloTE-MER104	1.47943e-09	TRUE	Cycling_progenitors	0.340805	0.447194
1.34853e-28	0.564742	0.691	0.633	1.45911e-25	DS_vs_CTL	SoloTE-MLT1B	8.72867e-28	TRUE	Cycling_progenitors	2.14598	3.08708
6.39703e-12	0.564215	0.396	0.267	6.92159e-09	DS_vs_CTL	SoloTE-MER81	1.86667e-11	TRUE	Cycling_progenitors	0.677318	0.739243
1.33401e-05	0.56191	0.088	0.049	0.014434	DS_vs_CTL	SoloTE-LTR89	1.80231e-05	TRUE	Cycling_progenitors	0.111639	0.157217
1.02982e-09	0.560969	0.094	0.048	1.11426e-06	DS_vs_CTL	SoloTE-HERVK3-int	2.28421e-09	TRUE	Cycling_progenitors	0.0905157	0.154953
3.96315e-08	0.560468	0.128	0.072	4.28812e-05	DS_vs_CTL	SoloTE-MSTB-int	7.36752e-08	TRUE	Cycling_progenitors	0.182822	0.268606
0.00206999	0.560314	0.07	0.043	1	DS_vs_CTL	SoloTE-LTR10D	0.00229212	TRUE	Cycling_progenitors	0.0690964	0.0820283
2.87702e-36	0.559881	0.86	0.834	3.11293e-33	DS_vs_CTL	SoloTE-MER5A	2.32777e-35	TRUE	Cycling_progenitors	4.21348	5.77595
3.44086e-09	0.558554	0.234	0.147	3.72301e-06	DS_vs_CTL	SoloTE-Tigger9b	7.22681e-09	TRUE	Cycling_progenitors	0.363572	0.434086
1.94407e-06	0.555995	0.054	0.028	0.00210348	DS_vs_CTL	SoloTE-Tigger6b	2.9388e-06	TRUE	Cycling_progenitors	0.0412281	0.0614619
7.3646e-11	0.555974	0.446	0.351	7.96849e-08	DS_vs_CTL	SoloTE-MER20B	1.91372e-10	TRUE	Cycling_progenitors	0.851428	1.18256
5.18154e-08	0.555448	0.347	0.246	5.60642e-05	DS_vs_CTL	SoloTE-MARNA	9.3163e-08	TRUE	Cycling_progenitors	0.525019	0.701962
7.59365e-13	0.55469	0.473	0.396	8.21633e-10	DS_vs_CTL	SoloTE-L4-A-Mam	2.361e-12	TRUE	Cycling_progenitors	0.934108	1.36862
1.38921e-08	0.553663	0.289	0.192	1.50313e-05	DS_vs_CTL	SoloTE-MLT1O	2.68783e-08	TRUE	Cycling_progenitors	0.425957	0.633927
1.28515e-18	0.552223	0.558	0.475	1.39053e-15	DS_vs_CTL	SoloTE-MLT1L	5.79131e-18	TRUE	Cycling_progenitors	1.38147	1.86136
6.50407e-07	0.551686	0.178	0.112	0.000703741	DS_vs_CTL	SoloTE-Tigger12	1.04772e-06	TRUE	Cycling_progenitors	0.153177	0.209788
1.30644e-09	0.550004	0.345	0.234	1.41357e-06	DS_vs_CTL	SoloTE-LTR33	2.87095e-09	TRUE	Cycling_progenitors	0.646744	0.952004
1.72324e-20	0.54993	0.644	0.551	1.86454e-17	DS_vs_CTL	SoloTE-MER58B	8.8909e-20	TRUE	Cycling_progenitors	1.6631	2.20742
6.44941e-09	0.549855	0.227	0.144	6.97826e-06	DS_vs_CTL	SoloTE-LTR79	1.30084e-08	TRUE	Cycling_progenitors	0.280158	0.390995
5.23653e-31	0.548877	0.823	0.767	5.66593e-28	DS_vs_CTL	SoloTE-MLT1D	3.61982e-30	TRUE	Cycling_progenitors	3.46541	4.5309
4.15881e-07	0.546435	0.165	0.102	0.000449983	DS_vs_CTL	SoloTE-MER11A	6.82275e-07	TRUE	Cycling_progenitors	0.226106	0.316756
3.00795e-22	0.545302	0.735	0.634	3.25461e-19	DS_vs_CTL	SoloTE-MER3	1.64743e-21	TRUE	Cycling_progenitors	2.03512	2.62326
1.10355e-06	0.543075	0.109	0.064	0.00119404	DS_vs_CTL	SoloTE-LTR56	1.71932e-06	TRUE	Cycling_progenitors	0.161931	0.198343
1.50299e-07	0.542058	0.202	0.128	0.000162623	DS_vs_CTL	SoloTE-LTR67B	2.57862e-07	TRUE	Cycling_progenitors	0.266108	0.3397
3.57363e-09	0.541827	0.377	0.266	3.86667e-06	DS_vs_CTL	SoloTE-MER44A	7.46165e-09	TRUE	Cycling_progenitors	0.495864	0.688247
3.77492e-06	0.538916	0.217	0.146	0.00408446	DS_vs_CTL	SoloTE-HSMAR1	5.53033e-06	TRUE	Cycling_progenitors	0.244831	0.359604
8.06789e-09	0.537856	0.265	0.172	8.72946e-06	DS_vs_CTL	SoloTE-MER8	1.60456e-08	TRUE	Cycling_progenitors	0.404946	0.532465
7.46733e-26	0.53703	0.7	0.641	8.07965e-23	DS_vs_CTL	SoloTE-MER33	4.50571e-25	TRUE	Cycling_progenitors	2.00457	2.65965
2.58844e-07	0.536342	0.103	0.058	0.000280069	DS_vs_CTL	SoloTE-LTR48	4.3364e-07	TRUE	Cycling_progenitors	0.118523	0.172519
1.41694e-10	0.536159	0.458	0.339	1.53313e-07	DS_vs_CTL	SoloTE-MLT1F2	3.53987e-10	TRUE	Cycling_progenitors	0.975904	1.2535
1.20907e-05	0.534253	0.296	0.218	0.0130822	DS_vs_CTL	SoloTE-MamRep605	1.63973e-05	TRUE	Cycling_progenitors	0.449045	0.703375
1.28897e-31	0.533595	0.952	0.947	1.39466e-28	DS_vs_CTL	SoloTE-Tigger1	8.99751e-31	TRUE	Cycling_progenitors	6.52378	8.70001
2.02741e-20	0.532301	0.628	0.562	2.19366e-17	DS_vs_CTL	SoloTE-MLT1K	1.0385e-19	TRUE	Cycling_progenitors	1.64315	2.38836
2.18534e-33	0.528133	0.843	0.793	2.36454e-30	DS_vs_CTL	SoloTE-Tigger3b	1.60408e-32	TRUE	Cycling_progenitors	3.18241	3.91064
2.26048e-17	0.52721	0.678	0.547	2.44584e-14	DS_vs_CTL	SoloTE-AluYk2	9.87401e-17	TRUE	Cycling_progenitors	1.71654	2.15274
9.89487e-23	0.524321	0.684	0.646	1.07063e-19	DS_vs_CTL	SoloTE-L1M4c	5.46136e-22	TRUE	Cycling_progenitors	2.1272	2.88871
2.1828e-08	0.523547	0.163	0.098	2.36179e-05	DS_vs_CTL	SoloTE-Charlie9	4.14441e-08	TRUE	Cycling_progenitors	0.173998	0.229336
1.9676e-33	0.521166	0.974	0.972	2.12895e-30	DS_vs_CTL	SoloTE-L1M4	1.45931e-32	TRUE	Cycling_progenitors	9.19328	12.1381
3.59553e-09	0.520227	0.154	0.09	3.89036e-06	DS_vs_CTL	SoloTE-LTR9B	7.4636e-09	TRUE	Cycling_progenitors	0.22856	0.282069
2.33553e-09	0.520105	0.064	0.03	2.52705e-06	DS_vs_CTL	SoloTE-MER76	5.00873e-09	TRUE	Cycling_progenitors	0.0539805	0.0804561
0.000109343	0.519943	0.069	0.039	0.118309	DS_vs_CTL	SoloTE-HERVE-a-int	0.00013578	TRUE	Cycling_progenitors	0.0891802	0.110811
4.32389e-29	0.518731	0.743	0.709	4.67845e-26	DS_vs_CTL	SoloTE-MER58A	2.85056e-28	TRUE	Cycling_progenitors	2.43874	3.295
5.10426e-08	0.518547	0.31	0.214	5.52281e-05	DS_vs_CTL	SoloTE-LTR17	9.20059e-08	TRUE	Cycling_progenitors	0.425704	0.510762
2.02668e-07	0.516387	0.359	0.263	0.000219287	DS_vs_CTL	SoloTE-MLT1E2	3.44391e-07	TRUE	Cycling_progenitors	0.683648	0.987433
5.25507e-06	0.512876	0.063	0.034	0.00568599	DS_vs_CTL	SoloTE-LTR88c	7.44558e-06	TRUE	Cycling_progenitors	0.0510955	0.0766596
1.1871e-08	0.511535	0.375	0.267	1.28444e-05	DS_vs_CTL	SoloTE-MER1A	2.31565e-08	TRUE	Cycling_progenitors	0.533974	0.708073
0.0449283	0.508943	0.053	0.037	1	DS_vs_CTL	SoloTE-Zaphod2	0.0464956	TRUE	Cycling_progenitors	0.0830432	0.0994855
1.27022e-06	0.505687	0.272	0.189	0.00137438	DS_vs_CTL	SoloTE-Plat-L3	1.96609e-06	TRUE	Cycling_progenitors	0.505001	0.65149
4.77018e-21	0.504382	0.873	0.864	5.16134e-18	DS_vs_CTL	SoloTE-L1M1	2.51583e-20	TRUE	Cycling_progenitors	4.49795	6.0116
1.45848e-10	0.504267	0.108	0.058	1.57808e-07	DS_vs_CTL	SoloTE-LTR25	3.63091e-10	TRUE	Cycling_progenitors	0.09893	0.140704
9.26795e-05	0.503601	0.067	0.038	0.100279	DS_vs_CTL	SoloTE-LTR45B	0.000117207	TRUE	Cycling_progenitors	0.0558549	0.0750772
7.66037e-37	0.503476	0.999	0.992	8.28852e-34	DS_vs_CTL	SoloTE-L1M5	6.41669e-36	TRUE	Cycling_progenitors	14.9359	20.0054
1.24633e-05	0.502974	0.115	0.071	0.0134853	DS_vs_CTL	SoloTE-Kanga1a	1.68705e-05	TRUE	Cycling_progenitors	0.120315	0.164156
1.42995e-05	0.501897	0.177	0.117	0.0154721	DS_vs_CTL	SoloTE-Charlie21a	1.92462e-05	TRUE	Cycling_progenitors	0.218371	0.280452
0.031016	0.501346	0.069	0.047	1	DS_vs_CTL	SoloTE-MLT1J1-int	0.0323803	TRUE	Cycling_progenitors	0.114542	0.140153
7.69743e-29	0.498523	0.751	0.742	8.32862e-26	DS_vs_CTL	SoloTE-MSTA	5.02805e-28	TRUE	Cycling_progenitors	2.80255	3.88109
0.000770277	0.498167	0.062	0.036	0.83344	DS_vs_CTL	SoloTE-MamGypsy2-LTR	0.000883152	TRUE	Cycling_progenitors	0.0718651	0.0878922
6.4871e-07	0.498094	0.094	0.053	0.000701904	DS_vs_CTL	SoloTE-MLT1F-int	1.04772e-06	TRUE	Cycling_progenitors	0.0902438	0.127978
1.02868e-10	0.497579	0.242	0.152	1.11303e-07	DS_vs_CTL	SoloTE-HERVIP10FH-int	2.58806e-10	TRUE	Cycling_progenitors	0.296342	0.350366
5.53916e-10	0.49392	0.336	0.227	5.99337e-07	DS_vs_CTL	SoloTE-MLT2B4	1.27634e-09	TRUE	Cycling_progenitors	0.640626	0.834738
6.14178e-15	0.493584	0.59	0.526	6.64541e-12	DS_vs_CTL	SoloTE-L1P4	2.33848e-14	TRUE	Cycling_progenitors	1.31775	1.7105
1.69435e-09	0.49311	0.475	0.383	1.83328e-06	DS_vs_CTL	SoloTE-Tigger13a	3.67797e-09	TRUE	Cycling_progenitors	0.923066	1.21468
1.34811e-05	0.492623	0.084	0.048	0.0145866	DS_vs_CTL	SoloTE-Tigger12A	1.81791e-05	TRUE	Cycling_progenitors	0.0620032	0.103243
2.39357e-06	0.492588	0.306	0.22	0.00258984	DS_vs_CTL	SoloTE-MER57A-int	3.55046e-06	TRUE	Cycling_progenitors	0.49142	0.622162
2.42281e-07	0.492428	0.417	0.328	0.000262148	DS_vs_CTL	SoloTE-L1PA12	4.08778e-07	TRUE	Cycling_progenitors	1.02975	1.2646
5.99915e-07	0.488691	0.326	0.234	0.000649108	DS_vs_CTL	SoloTE-MLT1H2	9.75204e-07	TRUE	Cycling_progenitors	0.618722	0.848114
9.33023e-10	0.488087	0.49	0.373	1.00953e-06	DS_vs_CTL	SoloTE-Tigger17a	2.08248e-09	TRUE	Cycling_progenitors	0.802771	1.06572
4.30112e-06	0.486571	0.197	0.132	0.00465381	DS_vs_CTL	SoloTE-LTR16A	6.21176e-06	TRUE	Cycling_progenitors	0.261314	0.389998
8.108e-14	0.486084	0.104	0.052	8.77286e-11	DS_vs_CTL	SoloTE-MER11B	2.8558e-13	TRUE	Cycling_progenitors	0.0994457	0.147884
6.07858e-10	0.485222	0.475	0.356	6.57703e-07	DS_vs_CTL	SoloTE-L4-C-Mam	1.38716e-09	TRUE	Cycling_progenitors	0.805203	1.09771
5.52059e-09	0.479277	0.451	0.338	5.97327e-06	DS_vs_CTL	SoloTE-MLT1F	1.11985e-08	TRUE	Cycling_progenitors	0.846538	1.04629
1.87904e-13	0.475933	0.189	0.107	2.03312e-10	DS_vs_CTL	SoloTE-MER45B	6.34065e-13	TRUE	Cycling_progenitors	0.267755	0.346336
8.15936e-11	0.475511	0.133	0.074	8.82842e-08	DS_vs_CTL	SoloTE-Chap1-Mam	2.08973e-10	TRUE	Cycling_progenitors	0.14911	0.205483
2.64555e-07	0.475387	0.408	0.314	0.000286249	DS_vs_CTL	SoloTE-MSTB1	4.42168e-07	TRUE	Cycling_progenitors	0.705828	0.998308
2.45418e-07	0.474836	0.387	0.287	0.000265542	DS_vs_CTL	SoloTE-MER58C	4.13092e-07	TRUE	Cycling_progenitors	0.601992	0.802932
0.000109463	0.472811	0.128	0.084	0.118439	DS_vs_CTL	SoloTE-MER121	0.00013578	TRUE	Cycling_progenitors	0.139839	0.19128
3.23394e-05	0.472161	0.075	0.043	0.0349912	DS_vs_CTL	SoloTE-LTR7C	4.23265e-05	TRUE	Cycling_progenitors	0.10107	0.109316
3.24688e-06	0.47209	0.253	0.177	0.00351312	DS_vs_CTL	SoloTE-MLT1H1	4.78629e-06	TRUE	Cycling_progenitors	0.392763	0.511931
6.85636e-08	0.471918	0.103	0.059	7.41858e-05	DS_vs_CTL	SoloTE-LTR16	1.21436e-07	TRUE	Cycling_progenitors	0.113488	0.187228
0.000989072	0.470687	0.104	0.068	1	DS_vs_CTL	SoloTE-MER66-int	0.00112495	TRUE	Cycling_progenitors	0.164787	0.222563
7.79738e-08	0.470513	0.45	0.355	8.43676e-05	DS_vs_CTL	SoloTE-L1PBa	1.37419e-07	TRUE	Cycling_progenitors	0.989582	1.28141
4.24609e-08	0.467861	0.34	0.239	4.59427e-05	DS_vs_CTL	SoloTE-ERV3-16A3-I-int	7.79179e-08	TRUE	Cycling_progenitors	0.472856	0.693246
5.89105e-11	0.465362	0.972	0.976	6.37412e-08	DS_vs_CTL	SoloTE-L1PA3	1.54776e-10	TRUE	Cycling_progenitors	15.0102	18.5481
2.60893e-08	0.465119	0.214	0.139	2.82286e-05	DS_vs_CTL	SoloTE-MER77B	4.92721e-08	TRUE	Cycling_progenitors	0.381145	0.476847
8.14223e-14	0.464239	0.276	0.167	8.80989e-11	DS_vs_CTL	SoloTE-MER21-int	2.8558e-13	TRUE	Cycling_progenitors	0.321212	0.444077
1.11718e-05	0.46265	0.141	0.091	0.0120879	DS_vs_CTL	SoloTE-LOR1-int	1.52382e-05	TRUE	Cycling_progenitors	0.218008	0.356546
2.25686e-06	0.462452	0.062	0.034	0.00244193	DS_vs_CTL	SoloTE-MERX	3.36874e-06	TRUE	Cycling_progenitors	0.0693595	0.0896596
1.71626e-07	0.462097	0.105	0.062	0.000185699	DS_vs_CTL	SoloTE-PRIMA4-int	2.92338e-07	TRUE	Cycling_progenitors	0.112124	0.134046
0.000988172	0.462016	0.06	0.036	1	DS_vs_CTL	SoloTE-MamGypLTR1c	0.00112495	TRUE	Cycling_progenitors	0.0828548	0.111926
2.47664e-07	0.461581	0.248	0.168	0.000267973	DS_vs_CTL	SoloTE-MLT2A1	4.15889e-07	TRUE	Cycling_progenitors	0.295192	0.398634
9.18128e-06	0.460307	0.221	0.152	0.00993415	DS_vs_CTL	SoloTE-LTR78B	1.27428e-05	TRUE	Cycling_progenitors	0.27988	0.398482
4.11505e-24	0.459856	0.826	0.797	4.45248e-21	DS_vs_CTL	SoloTE-Charlie1a	2.36283e-23	TRUE	Cycling_progenitors	2.97635	3.75921
4.94836e-05	0.458283	0.308	0.235	0.0535412	DS_vs_CTL	SoloTE-THE1A	6.40587e-05	TRUE	Cycling_progenitors	0.555047	0.84153
1.34458e-06	0.457224	0.245	0.168	0.00145484	DS_vs_CTL	SoloTE-MER4A1	2.06769e-06	TRUE	Cycling_progenitors	0.406614	0.541162
8.26639e-06	0.457086	0.143	0.092	0.00894423	DS_vs_CTL	SoloTE-LTR39	1.14954e-05	TRUE	Cycling_progenitors	0.151068	0.182856
0.000116721	0.456695	0.249	0.182	0.126292	DS_vs_CTL	SoloTE-MamTip2	0.000144531	TRUE	Cycling_progenitors	0.422191	0.533931
7.6135e-09	0.456408	0.302	0.206	8.2378e-06	DS_vs_CTL	SoloTE-MER53	1.5227e-08	TRUE	Cycling_progenitors	0.431773	0.601794
1.2591e-07	0.45425	0.107	0.063	0.000136234	DS_vs_CTL	SoloTE-MER65C	2.17065e-07	TRUE	Cycling_progenitors	0.140182	0.187591
4.07988e-09	0.453147	0.511	0.424	4.41443e-06	DS_vs_CTL	SoloTE-MLT1H	8.39559e-09	TRUE	Cycling_progenitors	0.980501	1.26372
0.0764425	0.452635	0.077	0.056	1	DS_vs_CTL	SoloTE-LTR41C	0.0784252	FALSE	Cycling_progenitors	0.11648	0.132857
8.01358e-08	0.450166	0.194	0.125	8.6707e-05	DS_vs_CTL	SoloTE-Tigger6a	1.40881e-07	TRUE	Cycling_progenitors	0.214037	0.324209
8.15501e-08	0.450013	0.163	0.102	8.82372e-05	DS_vs_CTL	SoloTE-MER113A	1.42663e-07	TRUE	Cycling_progenitors	0.20873	0.306524
5.256e-05	0.449451	0.09	0.054	0.0568699	DS_vs_CTL	SoloTE-HERVE-int	6.79178e-05	TRUE	Cycling_progenitors	0.126055	0.157635
8.48169e-07	0.448382	0.072	0.041	0.000917719	DS_vs_CTL	SoloTE-MLT1J2-int	1.351e-06	TRUE	Cycling_progenitors	0.0666881	0.139142
6.50117e-07	0.44458	0.427	0.332	0.000703427	DS_vs_CTL	SoloTE-MER102b	1.04772e-06	TRUE	Cycling_progenitors	0.760023	1.03105
7.763e-06	0.4438	0.152	0.099	0.00839956	DS_vs_CTL	SoloTE-Tigger9a	1.08378e-05	TRUE	Cycling_progenitors	0.16444	0.213358
4.04983e-08	0.442573	0.459	0.352	4.38191e-05	DS_vs_CTL	SoloTE-Tigger2a	7.50905e-08	TRUE	Cycling_progenitors	0.848608	1.10533
3.02283e-05	0.442539	0.103	0.066	0.032707	DS_vs_CTL	SoloTE-LTR82A	3.97095e-05	TRUE	Cycling_progenitors	0.201509	0.253021
0.00185336	0.442269	0.234	0.179	1	DS_vs_CTL	SoloTE-HERV4-I-int	0.00206187	TRUE	Cycling_progenitors	0.311635	0.348292
5.35966e-07	0.440843	0.292	0.206	0.000579915	DS_vs_CTL	SoloTE-MLT1G1	8.73245e-07	TRUE	Cycling_progenitors	0.402869	0.557423
1.76636e-11	0.439153	0.581	0.499	1.9112e-08	DS_vs_CTL	SoloTE-L1PB2	4.95137e-11	TRUE	Cycling_progenitors	1.41635	1.8564
5.66852e-08	0.434943	0.303	0.21	6.13334e-05	DS_vs_CTL	SoloTE-MER41-int	1.01153e-07	TRUE	Cycling_progenitors	0.499074	0.703045
0.000234799	0.433284	0.251	0.186	0.254052	DS_vs_CTL	SoloTE-MER4B-int	0.000280969	TRUE	Cycling_progenitors	0.29705	0.34966
9.65125e-21	0.432384	0.729	0.697	1.04427e-17	DS_vs_CTL	SoloTE-L1M3	5.01583e-20	TRUE	Cycling_progenitors	2.28777	3.06171
4.38134e-15	0.431367	0.603	0.545	4.74061e-12	DS_vs_CTL	SoloTE-L1M4b	1.69539e-14	TRUE	Cycling_progenitors	1.71944	2.29262
8.00898e-09	0.431204	0.516	0.427	8.66572e-06	DS_vs_CTL	SoloTE-Charlie2b	1.59731e-08	TRUE	Cycling_progenitors	0.963731	1.1796
9.15235e-07	0.429792	0.209	0.14	0.000990284	DS_vs_CTL	SoloTE-HERVK-int	1.44489e-06	TRUE	Cycling_progenitors	0.358767	0.499296
1.56978e-08	0.429292	0.146	0.088	1.6985e-05	DS_vs_CTL	SoloTE-LTR50	3.02077e-08	TRUE	Cycling_progenitors	0.181582	0.229426
1.11556e-05	0.426526	0.308	0.227	0.0120704	DS_vs_CTL	SoloTE-MER2B	1.52382e-05	TRUE	Cycling_progenitors	0.393456	0.503701
3.46601e-09	0.424607	0.144	0.086	3.75022e-06	DS_vs_CTL	SoloTE-MLT1J-int	7.25822e-09	TRUE	Cycling_progenitors	0.182368	0.251078
1.55723e-11	0.423787	0.607	0.529	1.68492e-08	DS_vs_CTL	SoloTE-MER30	4.3998e-11	TRUE	Cycling_progenitors	1.56851	1.97559
1.12539e-07	0.423663	0.331	0.237	0.000121767	DS_vs_CTL	SoloTE-MER39	1.95433e-07	TRUE	Cycling_progenitors	0.686575	0.754608
5.58769e-06	0.423293	0.214	0.149	0.00604588	DS_vs_CTL	SoloTE-L1P4a	7.87808e-06	TRUE	Cycling_progenitors	0.331389	0.37551
0.0445795	0.420997	0.059	0.04	1	DS_vs_CTL	SoloTE-HERVL74-int	0.0462018	TRUE	Cycling_progenitors	0.127561	0.171303
7.13734e-05	0.416758	0.062	0.036	0.0772261	DS_vs_CTL	SoloTE-LTR88b	9.05845e-05	TRUE	Cycling_progenitors	0.0867745	0.118429
0.000219077	0.415305	0.061	0.036	0.237041	DS_vs_CTL	SoloTE-ERV24-Prim-int	0.00026304	TRUE	Cycling_progenitors	0.0639927	0.0832544
1.38089e-06	0.414533	0.143	0.092	0.00149412	DS_vs_CTL	SoloTE-MER4A	2.11895e-06	TRUE	Cycling_progenitors	0.196321	0.238551
0.000323528	0.414411	0.19	0.136	0.350057	DS_vs_CTL	SoloTE-MER34A	0.000382009	TRUE	Cycling_progenitors	0.280805	0.345006
0.000129319	0.413557	0.323	0.25	0.139923	DS_vs_CTL	SoloTE-MER102a	0.00015875	TRUE	Cycling_progenitors	0.512208	0.67635
1.93311e-06	0.410124	0.462	0.381	0.00209162	DS_vs_CTL	SoloTE-Charlie1b	2.92845e-06	TRUE	Cycling_progenitors	0.80914	1.14262
6.58015e-09	0.409196	0.165	0.103	7.11972e-06	DS_vs_CTL	SoloTE-Charlie22a	1.32231e-08	TRUE	Cycling_progenitors	0.163366	0.225876
0.000471634	0.408571	0.225	0.167	0.510308	DS_vs_CTL	SoloTE-MamRep434	0.000549597	TRUE	Cycling_progenitors	0.361959	0.439307
3.84858e-08	0.40299	0.235	0.157	4.16416e-05	DS_vs_CTL	SoloTE-Charlie25	7.1921e-08	TRUE	Cycling_progenitors	0.304057	0.392374
2.04649e-07	0.402724	0.348	0.252	0.00022143	DS_vs_CTL	SoloTE-MER101-int	3.46929e-07	TRUE	Cycling_progenitors	0.55279	0.702967
2.06726e-06	0.401214	0.08	0.048	0.00223678	DS_vs_CTL	SoloTE-LTR16B2	3.11841e-06	TRUE	Cycling_progenitors	0.108042	0.139605
6.47394e-06	0.401055	0.247	0.176	0.0070048	DS_vs_CTL	SoloTE-MLT2D	9.0916e-06	TRUE	Cycling_progenitors	0.417431	0.53641
0.000586863	0.400988	0.064	0.04	0.634986	DS_vs_CTL	SoloTE-MER41E	0.000682755	TRUE	Cycling_progenitors	0.0923135	0.0926326
0.000215041	0.39931	0.075	0.047	0.232675	DS_vs_CTL	SoloTE-MamRep1527	0.000258631	TRUE	Cycling_progenitors	0.071153	0.0970086
1.19707e-05	0.399273	0.375	0.289	0.0129523	DS_vs_CTL	SoloTE-Charlie2a	1.62655e-05	TRUE	Cycling_progenitors	0.644352	0.788803
5.02851e-08	0.398935	0.419	0.313	5.44085e-05	DS_vs_CTL	SoloTE-Tigger2b-Pri	9.11017e-08	TRUE	Cycling_progenitors	0.705697	0.843066
0.000371606	0.39406	0.109	0.074	0.402077	DS_vs_CTL	SoloTE-LTR103-Mam	0.000436606	TRUE	Cycling_progenitors	0.318036	0.445474
0.015934	0.386664	0.113	0.083	1	DS_vs_CTL	SoloTE-MER113B	0.0168574	TRUE	Cycling_progenitors	0.133075	0.155352
2.1553e-06	0.385962	0.281	0.202	0.00233203	DS_vs_CTL	SoloTE-MER21A	3.22389e-06	TRUE	Cycling_progenitors	0.389737	0.475646
0.00138416	0.38443	0.055	0.035	1	DS_vs_CTL	SoloTE-MER96	0.00154957	TRUE	Cycling_progenitors	0.085303	0.0980726
1.3385e-08	0.384389	0.074	0.039	1.44826e-05	DS_vs_CTL	SoloTE-L1M3b	2.59676e-08	TRUE	Cycling_progenitors	0.0786522	0.0925929
4.6224e-06	0.383409	0.081	0.048	0.00500144	DS_vs_CTL	SoloTE-LTR29	6.60873e-06	TRUE	Cycling_progenitors	0.0828981	0.113224
4.23179e-08	0.382565	0.537	0.439	4.5788e-05	DS_vs_CTL	SoloTE-ERVL-E-int	7.78562e-08	TRUE	Cycling_progenitors	1.33461	1.59531
0.00259769	0.38235	0.052	0.033	1	DS_vs_CTL	SoloTE-MLT1G-int	0.00284547	TRUE	Cycling_progenitors	0.0919072	0.112469
5.03674e-06	0.382289	0.238	0.168	0.00544975	DS_vs_CTL	SoloTE-L1PA15-16	7.17231e-06	TRUE	Cycling_progenitors	0.403693	0.499175
3.90904e-07	0.381375	0.139	0.088	0.000422959	DS_vs_CTL	SoloTE-LTR8A	6.42781e-07	TRUE	Cycling_progenitors	0.17861	0.226365
0.000374893	0.380227	0.134	0.093	0.405634	DS_vs_CTL	SoloTE-LTR12F	0.000439743	TRUE	Cycling_progenitors	0.182114	0.226478
0.00151916	0.379143	0.172	0.127	1	DS_vs_CTL	SoloTE-MamRep1151	0.00169802	TRUE	Cycling_progenitors	0.180515	0.29402
9.58547e-06	0.378175	0.283	0.207	0.0103715	DS_vs_CTL	SoloTE-LTR49-int	1.32521e-05	TRUE	Cycling_progenitors	0.554885	0.729293
3.69798e-07	0.377249	0.399	0.3	0.000400122	DS_vs_CTL	SoloTE-MADE1	6.09483e-07	TRUE	Cycling_progenitors	0.7213	0.905948
0.000139504	0.375436	0.211	0.153	0.150943	DS_vs_CTL	SoloTE-Charlie24	0.000170372	TRUE	Cycling_progenitors	0.256412	0.335144
0.000684947	0.375072	0.095	0.063	0.741113	DS_vs_CTL	SoloTE-LTR40b	0.000791692	TRUE	Cycling_progenitors	0.110922	0.140168
1.57051e-06	0.369902	0.166	0.112	0.00169929	DS_vs_CTL	SoloTE-LTR37-int	2.38933e-06	TRUE	Cycling_progenitors	0.248794	0.301207
5.98804e-10	0.369252	0.195	0.125	6.47906e-07	DS_vs_CTL	SoloTE-MER106A	1.3709e-09	TRUE	Cycling_progenitors	0.208964	0.324309
4.27969e-18	0.367958	0.651	0.643	4.63062e-15	DS_vs_CTL	SoloTE-L1MD3	1.90446e-17	TRUE	Cycling_progenitors	1.59025	2.24883
1.17955e-06	0.365559	0.379	0.286	0.00127627	DS_vs_CTL	SoloTE-Charlie8	1.83371e-06	TRUE	Cycling_progenitors	0.724304	0.930808
1.07601e-07	0.362876	0.08	0.044	0.000116425	DS_vs_CTL	SoloTE-L1M	1.87775e-07	TRUE	Cycling_progenitors	0.0809579	0.124002
2.86074e-05	0.361903	0.077	0.046	0.0309532	DS_vs_CTL	SoloTE-LOR1a	3.76496e-05	TRUE	Cycling_progenitors	0.0995137	0.12586
0.000108402	0.360753	0.372	0.294	0.117291	DS_vs_CTL	SoloTE-MER113	0.000134934	TRUE	Cycling_progenitors	0.743866	0.984617
1.68467e-52	0.359854	1	0.997	1.82281e-49	DS_vs_CTL	SoloTE-AluSz6	4.44254e-51	TRUE	Cycling_progenitors	52.8738	60.3358
0.000101763	0.35946	0.107	0.073	0.110107	DS_vs_CTL	SoloTE-LTR54B	0.000127337	TRUE	Cycling_progenitors	0.148941	0.173623
3.79613e-05	0.358029	0.055	0.032	0.0410742	DS_vs_CTL	SoloTE-MER72	4.94122e-05	TRUE	Cycling_progenitors	0.0677994	0.0895579
5.22483e-07	0.355263	0.158	0.103	0.000565326	DS_vs_CTL	SoloTE-MER96B	8.53229e-07	TRUE	Cycling_progenitors	0.227106	0.293227
0.000742554	0.354651	0.057	0.034	0.803443	DS_vs_CTL	SoloTE-MamGypLTR3	0.000852739	TRUE	Cycling_progenitors	0.140174	0.149994
6.86383e-05	0.351976	0.102	0.067	0.0742667	DS_vs_CTL	SoloTE-MER49	8.76417e-05	TRUE	Cycling_progenitors	0.192686	0.218901
0.0242663	0.348274	0.063	0.044	1	DS_vs_CTL	SoloTE-MER67B	0.0254832	TRUE	Cycling_progenitors	0.0983383	0.109527
4.17905e-06	0.348147	0.063	0.037	0.00452173	DS_vs_CTL	SoloTE-MER50B	6.06004e-06	TRUE	Cycling_progenitors	0.0789434	0.102475
7.79479e-07	0.347169	0.157	0.103	0.000843397	DS_vs_CTL	SoloTE-MER90a	1.24998e-06	TRUE	Cycling_progenitors	0.220353	0.279976
1.44035e-39	0.342281	0.998	0.996	1.55845e-36	DS_vs_CTL	SoloTE-AluSq	1.42434e-38	TRUE	Cycling_progenitors	29.2464	32.6396
0.000191787	0.339685	0.143	0.102	0.207513	DS_vs_CTL	SoloTE-HERV35I-int	0.000232627	TRUE	Cycling_progenitors	0.321968	0.355005
0.000163268	0.339684	0.066	0.043	0.176656	DS_vs_CTL	SoloTE-Ricksha-0	0.000199053	TRUE	Cycling_progenitors	0.0596823	0.0803899
0.00223155	0.339675	0.144	0.107	1	DS_vs_CTL	SoloTE-LTR49	0.00245954	TRUE	Cycling_progenitors	0.21008	0.263053
0.191193	0.33964	0.058	0.044	1	DS_vs_CTL	SoloTE-X2-LINE	0.193916	FALSE	Cycling_progenitors	0.0706116	0.0825605
0.000178774	0.337671	0.103	0.07	0.193433	DS_vs_CTL	SoloTE-MER57A1	0.000217213	TRUE	Cycling_progenitors	0.191186	0.249068
4.5907e-28	0.336336	0.996	0.989	4.96713e-25	DS_vs_CTL	SoloTE-AluJr4	2.91837e-27	TRUE	Cycling_progenitors	15.1956	17.0374
9.71257e-53	0.335836	1	1	1.0509e-49	DS_vs_CTL	SoloTE-AluJb	2.65975e-51	TRUE	Cycling_progenitors	115.367	130.694
1.28024e-06	0.335212	0.053	0.029	0.00138522	DS_vs_CTL	SoloTE-MER68-int	1.97451e-06	TRUE	Cycling_progenitors	0.051233	0.0730389
0.000199238	0.334628	0.093	0.062	0.215575	DS_vs_CTL	SoloTE-MamGypLTR3a	0.000240844	TRUE	Cycling_progenitors	0.115442	0.161109
4.14963e-08	0.33111	0.539	0.49	4.48989e-05	DS_vs_CTL	SoloTE-L1P1	7.65423e-08	TRUE	Cycling_progenitors	1.56017	1.82015
5.27316e-06	0.330419	0.185	0.129	0.00570556	DS_vs_CTL	SoloTE-HERVIP10B3-int	7.44938e-06	TRUE	Cycling_progenitors	0.229984	0.245428
2.04023e-09	0.329281	0.186	0.122	2.20753e-06	DS_vs_CTL	SoloTE-Tigger8	4.41534e-09	TRUE	Cycling_progenitors	0.246563	0.294022
0.00047142	0.329156	0.229	0.174	0.510076	DS_vs_CTL	SoloTE-AluYh3a3	0.000549597	TRUE	Cycling_progenitors	0.352604	0.384555
2.10401e-05	0.328122	0.065	0.039	0.0227654	DS_vs_CTL	SoloTE-LTR65	2.79488e-05	TRUE	Cycling_progenitors	0.0540369	0.0864456
4.89452e-06	0.326079	0.547	0.465	0.00529587	DS_vs_CTL	SoloTE-L1P3	6.98377e-06	TRUE	Cycling_progenitors	1.18494	1.70187
8.36728e-07	0.324223	0.144	0.094	0.00090534	DS_vs_CTL	SoloTE-L1M6B	1.33576e-06	TRUE	Cycling_progenitors	0.121688	0.151666
0.00240295	0.323859	0.084	0.059	1	DS_vs_CTL	SoloTE-LTR82B	0.00264436	TRUE	Cycling_progenitors	0.103677	0.163543
6.37565e-06	0.322927	0.079	0.048	0.00689845	DS_vs_CTL	SoloTE-MER50-int	8.97127e-06	TRUE	Cycling_progenitors	0.152337	0.190865
0.000850953	0.32166	0.116	0.082	0.920731	DS_vs_CTL	SoloTE-MER9a3	0.000972517	TRUE	Cycling_progenitors	0.188412	0.189048
1.43616e-05	0.321219	0.271	0.201	0.0155393	DS_vs_CTL	SoloTE-MER50	1.92933e-05	TRUE	Cycling_progenitors	0.432828	0.536031
7.59871e-06	0.320529	0.239	0.174	0.0082218	DS_vs_CTL	SoloTE-LTR8	1.06292e-05	TRUE	Cycling_progenitors	0.389586	0.480632
1.56115e-48	0.320316	1	0.999	1.68916e-45	DS_vs_CTL	SoloTE-AluJo	2.64652e-47	TRUE	Cycling_progenitors	59.3541	65.8885
5.98036e-22	0.319589	0.989	0.974	6.47075e-19	DS_vs_CTL	SoloTE-AluSg4	3.25039e-21	TRUE	Cycling_progenitors	10.3445	11.3836
0.000976251	0.317409	0.068	0.044	1	DS_vs_CTL	SoloTE-LTR36	0.00111393	TRUE	Cycling_progenitors	0.0987248	0.126849
1.81856e-26	0.316948	0.996	0.989	1.96768e-23	DS_vs_CTL	SoloTE-AluSx4	1.1358e-25	TRUE	Cycling_progenitors	16.4275	18.2692
1.44205e-13	0.31514	0.824	0.78	1.5603e-10	DS_vs_CTL	SoloTE-AluYh3	4.93625e-13	TRUE	Cycling_progenitors	3.28127	3.63502
6.58535e-05	0.314654	0.203	0.148	0.0712535	DS_vs_CTL	SoloTE-MER31-int	8.43304e-05	TRUE	Cycling_progenitors	0.395781	0.422483
3.42879e-51	0.313598	1	1	3.70995e-48	DS_vs_CTL	SoloTE-AluSz	7.39787e-50	TRUE	Cycling_progenitors	132.869	148.245
2.05293e-05	0.309624	0.066	0.039	0.0222127	DS_vs_CTL	SoloTE-LTR2B	2.73212e-05	TRUE	Cycling_progenitors	0.096315	0.108743
9.29644e-07	0.309158	0.266	0.193	0.00100588	DS_vs_CTL	SoloTE-MLT1F1	1.45892e-06	TRUE	Cycling_progenitors	0.362985	0.471122
1.08508e-05	0.307479	0.136	0.092	0.0117405	DS_vs_CTL	SoloTE-MER44D	1.48572e-05	TRUE	Cycling_progenitors	0.146428	0.198954
2.80709e-13	0.306794	0.845	0.828	3.03727e-10	DS_vs_CTL	SoloTE-L1MDa	9.25301e-13	TRUE	Cycling_progenitors	4.66717	5.46021
1.69662e-44	0.303634	1	0.999	1.83574e-41	DS_vs_CTL	SoloTE-AluJr	1.98032e-43	TRUE	Cycling_progenitors	65.0634	72.5239
5.26001e-06	0.30214	0.241	0.176	0.00569133	DS_vs_CTL	SoloTE-Charlie10	7.44558e-06	TRUE	Cycling_progenitors	0.280648	0.347233
0.00249607	0.300952	0.064	0.043	1	DS_vs_CTL	SoloTE-MER51-int	0.0027426	TRUE	Cycling_progenitors	0.0969571	0.117809
0.0177659	0.300677	0.065	0.046	1	DS_vs_CTL	SoloTE-MER34C-	0.0187675	TRUE	Cycling_progenitors	0.0847668	0.113868
9.65295e-05	0.300526	0.178	0.128	0.104445	DS_vs_CTL	SoloTE-LTR81B	0.000121429	TRUE	Cycling_progenitors	1.16942	1.21531
5.39511e-10	0.299659	0.112	0.067	5.83751e-07	DS_vs_CTL	SoloTE-MLT2C2	1.24718e-09	TRUE	Cycling_progenitors	0.114967	0.153068
1.02568e-08	0.298786	0.295	0.21	1.10979e-05	DS_vs_CTL	SoloTE-ERVL-B4-int	2.01736e-08	TRUE	Cycling_progenitors	0.47454	0.64158
1.51008e-37	0.296984	1	0.997	1.63391e-34	DS_vs_CTL	SoloTE-AluSx3	1.36098e-36	TRUE	Cycling_progenitors	38.8975	43.156
5.7454e-50	0.296817	1	0.999	6.21652e-47	DS_vs_CTL	SoloTE-AluSx1	1.1056e-48	TRUE	Cycling_progenitors	157.501	172.969
4.49374e-07	0.29635	0.158	0.108	0.000486222	DS_vs_CTL	SoloTE-LTR37B	7.35527e-07	TRUE	Cycling_progenitors	0.20655	0.241694
0.000359407	0.295595	0.285	0.222	0.388879	DS_vs_CTL	SoloTE-AluYd8	0.000423672	TRUE	Cycling_progenitors	0.614071	0.590844
3.78978e-06	0.29255	0.132	0.092	0.00410054	DS_vs_CTL	SoloTE-LTR41	5.54071e-06	TRUE	Cycling_progenitors	0.254332	0.318356
6.18104e-11	0.291531	0.808	0.759	6.68789e-08	DS_vs_CTL	SoloTE-AluSq4	1.61798e-10	TRUE	Cycling_progenitors	2.82101	3.00094
9.33061e-06	0.290153	0.568	0.496	0.0100957	DS_vs_CTL	SoloTE-MLT1A	1.29249e-05	TRUE	Cycling_progenitors	1.36593	1.68149
0.00126518	0.287818	0.113	0.082	1	DS_vs_CTL	SoloTE-LTR9D	0.00142083	TRUE	Cycling_progenitors	0.131058	0.168707
7.01175e-19	0.287252	0.98	0.956	7.58671e-16	DS_vs_CTL	SoloTE-AluSc5	3.20023e-18	TRUE	Cycling_progenitors	9.97114	10.7813
0.00254942	0.285751	0.075	0.053	1	DS_vs_CTL	SoloTE-MER41C	0.0027969	TRUE	Cycling_progenitors	0.100471	0.136857
2.3538e-06	0.284269	0.311	0.233	0.00254682	DS_vs_CTL	SoloTE-THE1D-int	3.49877e-06	TRUE	Cycling_progenitors	0.50169	0.694974
1.26867e-41	0.284066	1	0.999	1.3727e-38	DS_vs_CTL	SoloTE-AluSq2	1.30912e-40	TRUE	Cycling_progenitors	79.6857	86.6684
1.05766e-05	0.283853	0.241	0.182	0.0114439	DS_vs_CTL	SoloTE-MER4E1	1.45098e-05	TRUE	Cycling_progenitors	0.360474	0.472261
5.16521e-15	0.28301	0.852	0.856	5.58876e-12	DS_vs_CTL	SoloTE-L1MD	1.98791e-14	TRUE	Cycling_progenitors	3.33213	4.14098
0.000782863	0.282341	0.108	0.079	0.847058	DS_vs_CTL	SoloTE-LTR37A	0.000896139	TRUE	Cycling_progenitors	0.211001	0.282867
1.86869e-39	0.2815	1	0.999	2.02193e-36	DS_vs_CTL	SoloTE-AluSp	1.82262e-38	TRUE	Cycling_progenitors	81.4726	89.2272
2.76704e-05	0.280144	0.34	0.264	0.0299394	DS_vs_CTL	SoloTE-MER41B	3.65516e-05	TRUE	Cycling_progenitors	0.572589	0.705249
0.142943	0.279896	0.051	0.038	1	DS_vs_CTL	SoloTE-MER34C2	0.145602	FALSE	Cycling_progenitors	0.0759566	0.0825873
2.98813e-39	0.279291	1	0.998	3.23315e-36	DS_vs_CTL	SoloTE-AluSc	2.87506e-38	TRUE	Cycling_progenitors	49.7449	54.5234
0.0670934	0.279251	0.142	0.113	1	DS_vs_CTL	SoloTE-MER4D	0.0689329	FALSE	Cycling_progenitors	0.211893	0.239876
3.88014e-37	0.276977	1	0.998	4.19831e-34	DS_vs_CTL	SoloTE-AluSg	3.3691e-36	TRUE	Cycling_progenitors	52.9186	57.7848
0.00107994	0.27034	0.187	0.143	1	DS_vs_CTL	SoloTE-MADE2	0.00122244	TRUE	Cycling_progenitors	0.230002	0.286424
0.000127424	0.267386	0.196	0.147	0.137873	DS_vs_CTL	SoloTE-Looper	0.000156694	TRUE	Cycling_progenitors	0.293457	0.369413
0.00350151	0.265761	0.071	0.05	1	DS_vs_CTL	SoloTE-LTR76	0.00377739	TRUE	Cycling_progenitors	0.0992956	0.110268
4.08553e-06	0.26526	0.283	0.215	0.00442054	DS_vs_CTL	SoloTE-MER65-int	5.94867e-06	TRUE	Cycling_progenitors	0.541008	0.613814
0.00610099	0.263001	0.055	0.037	1	DS_vs_CTL	SoloTE-ERV3-16A3-LTR	0.00649314	TRUE	Cycling_progenitors	0.0484514	0.0696174
1.28121e-06	0.262871	0.171	0.123	0.00138627	DS_vs_CTL	SoloTE-MER61-int	1.97451e-06	TRUE	Cycling_progenitors	0.323605	0.397881
8.56077e-07	0.259858	0.126	0.086	0.000926275	DS_vs_CTL	SoloTE-L1PBb	1.36055e-06	TRUE	Cycling_progenitors	0.173152	0.201345
0.0269687	0.257084	0.127	0.101	1	DS_vs_CTL	SoloTE-LTR10A	0.0282794	TRUE	Cycling_progenitors	0.20292	0.2251
0.000729439	0.257015	0.504	0.436	0.789253	DS_vs_CTL	SoloTE-MLT1A1	0.000840389	TRUE	Cycling_progenitors	1.04259	1.25546
9.87128e-40	0.253255	1	1	1.06807e-36	DS_vs_CTL	SoloTE-AluSx	9.89909e-39	TRUE	Cycling_progenitors	152.018	165.188
8.75234e-07	0.252605	0.339	0.259	0.000947003	DS_vs_CTL	SoloTE-Kanga2-a	1.3879e-06	TRUE	Cycling_progenitors	0.540453	0.606934
2.7242e-08	0.251868	0.142	0.094	2.94758e-05	DS_vs_CTL	SoloTE-Tigger11a	5.13129e-08	TRUE	Cycling_progenitors	0.0805478	0.105491
0.20884	0.250274	0.137	0.116	1	DS_vs_CTL	SoloTE-L5	0.211213	FALSE	Cycling_progenitors	0.168676	0.184983
1.69442e-11	0.250231	0.893	0.863	1.83337e-08	DS_vs_CTL	SoloTE-FRAM	4.7685e-11	TRUE	Cycling_progenitors	4.21324	4.39415
1.04917e-05	0.250192	0.19	0.139	0.011352	DS_vs_CTL	SoloTE-MER74A	1.4421e-05	TRUE	Cycling_progenitors	0.464549	0.683625
0.115602	0.248962	0.066	0.052	1	DS_vs_CTL	SoloTE-Charlie6	0.117921	FALSE	Cycling_progenitors	0.116505	0.122297
3.3233e-06	0.247643	0.077	0.048	0.00359581	DS_vs_CTL	SoloTE-MER54A	4.88882e-06	FALSE	Cycling_progenitors	0.0822028	0.148203
3.40626e-18	0.247168	0.99	0.987	3.68557e-15	DS_vs_CTL	SoloTE-AluSg7	1.52532e-17	FALSE	Cycling_progenitors	12.7043	13.9756
5.19756e-25	0.240557	1	0.997	5.62376e-22	DS_vs_CTL	SoloTE-AluSc8	3.0584e-24	FALSE	Cycling_progenitors	34.9828	38.0261
8.04547e-08	0.239242	0.25	0.181	8.7052e-05	DS_vs_CTL	SoloTE-Charlie15b	1.41093e-07	FALSE	Cycling_progenitors	0.319186	0.421532
1.80902e-05	0.238165	0.059	0.037	0.0195736	DS_vs_CTL	SoloTE-LTR64	2.41655e-05	FALSE	Cycling_progenitors	0.070634	0.0783944
1.36186e-16	0.236819	0.994	0.992	1.47354e-13	DS_vs_CTL	SoloTE-FLAM-C	5.77171e-16	FALSE	Cycling_progenitors	13.7188	14.5199
4.08216e-08	0.230566	0.099	0.062	4.4169e-05	DS_vs_CTL	SoloTE-HERV3-int	7.54934e-08	FALSE	Cycling_progenitors	0.128091	0.143741
1.33557e-10	0.229633	0.925	0.894	1.44509e-07	DS_vs_CTL	SoloTE-AluYc	3.34834e-10	FALSE	Cycling_progenitors	5.4862	5.81515
0.00112449	0.227154	0.058	0.041	1	DS_vs_CTL	SoloTE-Charlie11	0.00126683	FALSE	Cycling_progenitors	0.0580219	0.0663364
0.0550053	0.226135	0.051	0.038	1	DS_vs_CTL	SoloTE-LTR1D	0.0565951	FALSE	Cycling_progenitors	0.164121	0.167902
0.0187511	0.22228	0.05	0.037	1	DS_vs_CTL	SoloTE-PRIMA41-int	0.019779	FALSE	Cycling_progenitors	0.0709767	0.0728976
2.32711e-06	0.220447	0.747	0.717	0.00251793	DS_vs_CTL	SoloTE-FAM	3.46632e-06	FALSE	Cycling_progenitors	2.2917	2.51663
1.38893e-06	0.218228	0.062	0.039	0.00150282	DS_vs_CTL	SoloTE-LTR24B	2.12214e-06	FALSE	Cycling_progenitors	0.0598561	0.0747692
9.25187e-07	0.218004	0.096	0.063	0.00100105	DS_vs_CTL	SoloTE-Charlie17	1.45737e-06	FALSE	Cycling_progenitors	0.108916	0.153973
6.86855e-05	0.216921	0.3	0.237	0.0743177	DS_vs_CTL	SoloTE-LTR12C	8.76417e-05	FALSE	Cycling_progenitors	0.567307	0.643458
1.47348e-06	0.215704	0.109	0.074	0.00159431	DS_vs_CTL	SoloTE-Kanga1	2.24651e-06	FALSE	Cycling_progenitors	0.139971	0.187381
6.95754e-05	0.214036	0.937	0.931	0.0752806	DS_vs_CTL	SoloTE-L1PA2	8.86184e-05	FALSE	Cycling_progenitors	9.5004	10.2916
0.00101571	0.212141	0.637	0.568	1	DS_vs_CTL	SoloTE-AluYk4	0.0011534	FALSE	Cycling_progenitors	1.84764	1.95631
0.00333817	0.209892	0.51	0.445	1	DS_vs_CTL	SoloTE-Tigger19b	0.00361763	FALSE	Cycling_progenitors	1.15607	1.34299
0.000368108	0.209833	0.19	0.147	0.398293	DS_vs_CTL	SoloTE-MER63C	0.000433212	FALSE	Cycling_progenitors	0.332897	0.372826
1.69322e-07	0.20979	0.13	0.088	0.000183207	DS_vs_CTL	SoloTE-MER92-int	2.89107e-07	FALSE	Cycling_progenitors	0.210533	0.270906
0.000127137	0.206379	0.722	0.657	0.137562	DS_vs_CTL	SoloTE-AluYk3	0.000156611	FALSE	Cycling_progenitors	2.30684	2.38561
0.042062	0.201538	0.346	0.301	1	DS_vs_CTL	SoloTE-Charlie5	0.0436562	FALSE	Cycling_progenitors	0.767718	0.883771
0.00132653	0.199486	0.093	0.068	1	DS_vs_CTL	SoloTE-MLT1E1	0.00148738	FALSE	Cycling_progenitors	0.165244	0.196727
3.21914e-06	0.199397	0.179	0.13	0.00348311	DS_vs_CTL	SoloTE-MER34	4.75524e-06	FALSE	Cycling_progenitors	0.258305	0.302567
1.17383e-30	0.198197	1	1	1.27008e-27	DS_vs_CTL	SoloTE-AluY	7.95967e-30	FALSE	Cycling_progenitors	194.888	202.255
5.9554e-09	0.197975	0.199	0.142	6.44375e-06	DS_vs_CTL	SoloTE-MER65A	1.20462e-08	FALSE	Cycling_progenitors	0.255766	0.306735
3.12167e-05	0.192868	0.101	0.069	0.0337765	DS_vs_CTL	SoloTE-LTR9A1	4.09324e-05	FALSE	Cycling_progenitors	0.0844166	0.102707
3.23201e-07	0.191234	0.185	0.134	0.000349704	DS_vs_CTL	SoloTE-MER11C	5.35161e-07	FALSE	Cycling_progenitors	0.298633	0.319514
3.13802e-07	0.188026	0.131	0.093	0.000339534	DS_vs_CTL	SoloTE-MER67C	5.22026e-07	FALSE	Cycling_progenitors	0.231153	0.272678
4.46893e-05	0.184787	0.135	0.099	0.0483538	DS_vs_CTL	SoloTE-LTR84b	5.79576e-05	FALSE	Cycling_progenitors	0.230052	0.237617
3.89387e-05	0.184047	0.408	0.334	0.0421317	DS_vs_CTL	SoloTE-MLT1G3	5.05919e-05	FALSE	Cycling_progenitors	0.749706	0.876738
0.00408947	0.180245	0.485	0.471	1	DS_vs_CTL	SoloTE-L1P2	0.0043917	FALSE	Cycling_progenitors	1.17955	1.35182
0.0017583	0.178921	0.052	0.034	1	DS_vs_CTL	SoloTE-LTR13A	0.00195918	FALSE	Cycling_progenitors	0.0919323	0.109098
0.00188096	0.175246	0.694	0.667	1	DS_vs_CTL	SoloTE-AluSq10	0.00208931	FALSE	Cycling_progenitors	2.34918	2.44734
3.33615e-05	0.170323	0.29	0.232	0.0360972	DS_vs_CTL	SoloTE-MER4D1	4.35842e-05	FALSE	Cycling_progenitors	0.529581	0.600199
0.69858	0.1697	0.126	0.121	1	DS_vs_CTL	SoloTE-LTR46-int	0.700548	FALSE	Cycling_progenitors	0.245677	0.293236
7.32812e-05	0.167511	0.144	0.109	0.0792902	DS_vs_CTL	SoloTE-MamRep4096	9.28402e-05	FALSE	Cycling_progenitors	0.163392	0.186037
0.0226266	0.165869	0.144	0.118	1	DS_vs_CTL	SoloTE-MER97c	0.0237963	FALSE	Cycling_progenitors	0.174964	0.193592
0.000621362	0.161359	0.142	0.11	0.672314	DS_vs_CTL	SoloTE-MER66B	0.000720537	FALSE	Cycling_progenitors	0.218225	0.260304
6.5565e-06	0.159393	0.922	0.928	0.00709413	DS_vs_CTL	SoloTE-FLAM-A	9.18942e-06	FALSE	Cycling_progenitors	5.46301	6.03799
0.00010604	0.158536	0.072	0.05	0.114735	DS_vs_CTL	SoloTE-LTR33B	0.000132457	FALSE	Cycling_progenitors	0.0973773	0.132379
0.00030527	0.156784	0.071	0.051	0.330302	DS_vs_CTL	SoloTE-LTR16A2	0.000361651	FALSE	Cycling_progenitors	0.0994855	0.135562
0.00162937	0.156354	0.055	0.037	1	DS_vs_CTL	SoloTE-LTR16B	0.00181836	FALSE	Cycling_progenitors	0.0791901	0.0973885
0.0537926	0.155946	0.08	0.064	1	DS_vs_CTL	SoloTE-LTR10G	0.0554274	FALSE	Cycling_progenitors	0.0893493	0.0961704
0.000200143	0.152202	0.791	0.731	0.216555	DS_vs_CTL	SoloTE-AluYf1	0.000241529	FALSE	Cycling_progenitors	3.02719	3.09015
0.00360581	0.151395	0.448	0.391	1	DS_vs_CTL	SoloTE-AluYc3	0.00388402	FALSE	Cycling_progenitors	1.0117	1.09814
0.000137921	0.148567	0.13	0.097	0.14923	DS_vs_CTL	SoloTE-PABL-A-int	0.000168728	FALSE	Cycling_progenitors	0.0970168	0.12687
4.22571e-06	0.147427	0.206	0.158	0.00457222	DS_vs_CTL	SoloTE-L1M3c	6.11525e-06	FALSE	Cycling_progenitors	0.377382	0.456593
0.00424666	0.143231	0.251	0.212	1	DS_vs_CTL	SoloTE-AluYa8	0.00453997	FALSE	Cycling_progenitors	0.482543	0.430323
0.00339644	0.141264	0.185	0.153	1	DS_vs_CTL	SoloTE-MER63D	0.00367517	FALSE	Cycling_progenitors	0.245603	0.289956
0.0486554	0.138978	0.056	0.044	1	DS_vs_CTL	SoloTE-MLT1H2-int	0.0502796	FALSE	Cycling_progenitors	0.124727	0.158796
0.368692	0.13863	0.082	0.072	1	DS_vs_CTL	SoloTE-MamTip1	0.372353	FALSE	Cycling_progenitors	0.112581	0.102014
0.00271801	0.135673	0.372	0.321	1	DS_vs_CTL	SoloTE-AluYb9	0.00296358	FALSE	Cycling_progenitors	0.96892	0.981621
0.00109559	0.129504	0.102	0.079	1	DS_vs_CTL	SoloTE-LTR19A	0.0012382	FALSE	Cycling_progenitors	0.0847714	0.109416
0.000107564	0.125435	0.215	0.172	0.116385	DS_vs_CTL	SoloTE-AluYe6	0.000134126	FALSE	Cycling_progenitors	0.383466	0.354482
0.00121123	0.124352	0.078	0.06	1	DS_vs_CTL	SoloTE-PABL-A	0.0013624	FALSE	Cycling_progenitors	0.120422	0.142606
0.00302875	0.119961	0.152	0.124	1	DS_vs_CTL	SoloTE-Zaphod	0.00329232	FALSE	Cycling_progenitors	0.285329	0.342767
0.00323897	0.115967	0.08	0.062	1	DS_vs_CTL	SoloTE-MER124	0.00351547	FALSE	Cycling_progenitors	0.100056	0.11491
0.00112092	0.112425	0.966	0.96	1	DS_vs_CTL	SoloTE-AluYa5	0.00126481	FALSE	Cycling_progenitors	8.87736	9.16109
0.0270699	0.110691	0.568	0.518	1	DS_vs_CTL	SoloTE-HERVH-int	0.0283438	FALSE	Cycling_progenitors	2.37606	2.47737
0.0964557	0.110185	0.055	0.043	1	DS_vs_CTL	SoloTE-MER57E1	0.0986731	FALSE	Cycling_progenitors	0.0952738	0.121894
0.00506898	0.107138	0.769	0.715	1	DS_vs_CTL	SoloTE-AluYe5	0.00541096	FALSE	Cycling_progenitors	2.93684	2.89195
0.0026722	0.101383	0.52	0.461	1	DS_vs_CTL	SoloTE-AluYg6	0.00291811	FALSE	Cycling_progenitors	1.40899	1.441
3.22681e-07	0.100548	0.199	0.153	0.000349141	DS_vs_CTL	SoloTE-L1M2c	5.35161e-07	FALSE	Cycling_progenitors	0.281509	0.402756
0.170679	0.0935192	0.602	0.567	1	DS_vs_CTL	SoloTE-Alu	0.173358	FALSE	Cycling_progenitors	1.54565	1.56221
0.000389381	0.0892688	0.165	0.132	0.42131	DS_vs_CTL	SoloTE-Arthur1	0.000455985	FALSE	Cycling_progenitors	0.283925	0.370184
2.43338e-05	0.0826747	0.123	0.093	0.0263292	DS_vs_CTL	SoloTE-MER75	3.22038e-05	FALSE	Cycling_progenitors	0.133979	0.152545
0.0003101	0.0781075	0.436	0.382	0.335528	DS_vs_CTL	SoloTE-MER41A	0.000366762	FALSE	Cycling_progenitors	0.89402	0.931704
0.00414228	0.0757973	0.148	0.123	1	DS_vs_CTL	SoloTE-LTR25-int	0.00443505	FALSE	Cycling_progenitors	0.296143	0.314374
0.823934	0.0740573	0.349	0.339	1	DS_vs_CTL	SoloTE-AluYk11	0.823934	FALSE	Cycling_progenitors	0.634469	0.652968
9.29111e-05	0.0656646	0.089	0.067	0.10053	DS_vs_CTL	SoloTE-MER57B2	0.000117292	FALSE	Cycling_progenitors	0.110733	0.149045
0.0805865	0.063887	0.165	0.149	1	DS_vs_CTL	SoloTE-LTR5B	0.0825577	FALSE	Cycling_progenitors	0.3497	0.361298
0.00283921	0.0631523	0.094	0.076	1	DS_vs_CTL	SoloTE-LTR23	0.003091	FALSE	Cycling_progenitors	0.157826	0.178121
0.000599871	0.060576	0.336	0.293	0.64906	DS_vs_CTL	SoloTE-AluYi6	0.00069675	FALSE	Cycling_progenitors	0.742693	0.727157
0.000459012	0.0441568	0.063	0.047	0.49665	DS_vs_CTL	SoloTE-MER45C	0.000536644	FALSE	Cycling_progenitors	0.0928149	0.119265
0.000721463	0.043441	0.053	0.039	0.780623	DS_vs_CTL	SoloTE-LTR14B	0.000832547	FALSE	Cycling_progenitors	0.0747695	0.0777519
5.39379e-05	0.0413608	0.162	0.131	0.0583608	DS_vs_CTL	SoloTE-MER57E3	6.95721e-05	FALSE	Cycling_progenitors	0.228659	0.232758
0.0217733	0.0356579	0.104	0.089	1	DS_vs_CTL	SoloTE-LTR5A	0.0229329	FALSE	Cycling_progenitors	0.288207	0.295561
0.000302385	0.0342376	0.472	0.419	0.327181	DS_vs_CTL	SoloTE-MER4-int	0.000358831	FALSE	Cycling_progenitors	1.12481	1.19844
0.00799017	0.0331807	0.106	0.086	1	DS_vs_CTL	SoloTE-Tigger1a-Art	0.00847839	FALSE	Cycling_progenitors	0.147402	0.166125
0.441746	0.0292969	0.911	0.912	1	DS_vs_CTL	SoloTE-AluYb8	0.444242	FALSE	Cycling_progenitors	6.15294	5.90894
0.36945	0.0194739	0.969	0.963	1	DS_vs_CTL	SoloTE-AluYm1	0.37259	FALSE	Cycling_progenitors	8.82938	9.08026
0.000655906	0.0156478	0.164	0.137	0.709691	DS_vs_CTL	SoloTE-HERVS71-int	0.000759358	FALSE	Cycling_progenitors	0.234036	0.285798
0.000130393	0.0154657	0.073	0.056	0.141085	DS_vs_CTL	SoloTE-MER57B1	0.000159793	FALSE	Cycling_progenitors	0.0937158	0.123525
0.000732892	0.0093914	0.075	0.059	0.792989	DS_vs_CTL	SoloTE-LTR47A	0.000843003	FALSE	Cycling_progenitors	0.118944	0.135639
1.10272e-06	0.00406921	0.126	0.098	0.00119314	DS_vs_CTL	SoloTE-MLT2C1	1.71932e-06	FALSE	Cycling_progenitors	0.185173	0.234225
0.79364	0.000295168	0.766	0.756	1	DS_vs_CTL	SoloTE-L1HS	0.794756	FALSE	Cycling_progenitors	3.41699	3.23246
0.000245724	-0.00546328	0.122	0.102	0.265874	DS_vs_CTL	SoloTE-MLT1A1-int	0.00029355	FALSE	Cycling_progenitors	0.163508	0.163287
0.0302507	-0.0296911	0.076	0.068	1	DS_vs_CTL	SoloTE-MER4C	0.0316278	FALSE	Cycling_progenitors	0.13225	0.147049
0.415532	-0.0325041	0.115	0.111	1	DS_vs_CTL	SoloTE-MER34-int	0.41847	FALSE	Cycling_progenitors	0.139743	0.143217
0.000275657	-0.040255	0.426	0.379	0.298261	DS_vs_CTL	SoloTE-L1PB	0.000328207	FALSE	Cycling_progenitors	0.865482	0.906986
0.00103574	-0.0412137	0.165	0.144	1	DS_vs_CTL	SoloTE-LTR13	0.00117427	FALSE	Cycling_progenitors	0.355393	0.360475
0.162622	-0.0482763	0.066	0.061	1	DS_vs_CTL	SoloTE-LTR61	0.16541	FALSE	Cycling_progenitors	0.107909	0.108054
0.592212	-0.067753	0.894	0.899	1	DS_vs_CTL	SoloTE-AluYj4	0.594718	FALSE	Cycling_progenitors	4.99139	4.8426
3.70056e-05	-0.0759158	0.184	0.161	0.04004	DS_vs_CTL	SoloTE-LTR7	4.82564e-05	FALSE	Cycling_progenitors	0.465021	0.501958
0.000194815	-0.07689	0.061	0.046	0.21079	DS_vs_CTL	SoloTE-HERVK11-int	0.000235898	FALSE	Cycling_progenitors	0.0949253	0.14557
0.000124794	-0.0800754	0.134	0.113	0.135027	DS_vs_CTL	SoloTE-MER34B-int	0.000153992	FALSE	Cycling_progenitors	0.230153	0.232835
1.96895e-05	-0.08065	0.071	0.055	0.0213041	DS_vs_CTL	SoloTE-ERV24B-Prim-int	2.62527e-05	FALSE	Cycling_progenitors	0.0941614	0.104236
0.00626859	-0.106613	0.113	0.102	1	DS_vs_CTL	SoloTE-AluYk12	0.00666155	FALSE	Cycling_progenitors	0.151677	0.141191
0.00349867	-0.113822	0.169	0.151	1	DS_vs_CTL	SoloTE-LTR5-Hs	0.00377739	FALSE	Cycling_progenitors	0.311101	0.313256
0.200823	-0.1226	0.1	0.099	1	DS_vs_CTL	SoloTE-LTR2	0.203394	FALSE	Cycling_progenitors	0.198168	0.205456
4.40632e-06	-0.142518	0.205	0.184	0.00476764	DS_vs_CTL	SoloTE-MER4E	6.35081e-06	FALSE	Cycling_progenitors	0.288492	0.294668
0.00263586	-0.168747	0.295	0.293	1	DS_vs_CTL	SoloTE-LTR7B	0.00288285	FALSE	Cycling_progenitors	0.816722	0.798842
0.00386162	-0.169337	0.1	0.093	1	DS_vs_CTL	SoloTE-HUERS-P3-int	0.00415328	FALSE	Cycling_progenitors	0.16603	0.177531
0.00410237	-0.183677	0.12	0.117	1	DS_vs_CTL	SoloTE-MLT1F2-int	0.00439893	FALSE	Cycling_progenitors	0.244959	0.195277
0.0344369	-0.203349	0.055	0.052	1	DS_vs_CTL	SoloTE-HERVI-int	0.0358991	FALSE	Cycling_progenitors	0.0998128	0.089575
0.00197595	-0.206791	0.06	0.054	1	DS_vs_CTL	SoloTE-LTR53	0.0021914	FALSE	Cycling_progenitors	0.0967652	0.114767
0.0124504	-0.247118	0.108	0.111	1	DS_vs_CTL	SoloTE-LTR6A	0.0131915	FALSE	Cycling_progenitors	0.17602	0.185612
0.0534073	-0.273642	0.143	0.156	1	DS_vs_CTL	SoloTE-MER110-int	0.0551101	FALSE	Cycling_progenitors	0.340752	0.286072
0.000120542	-0.296276	0.151	0.149	0.130426	DS_vs_CTL	SoloTE-LTR12E	0.000149003	TRUE	Cycling_progenitors	0.188335	0.135103
5.82634e-05	-0.307906	0.134	0.136	0.063041	DS_vs_CTL	SoloTE-ORSL	7.47451e-05	TRUE	Cycling_progenitors	0.209373	0.229743
2.40933e-05	-0.331082	0.308	0.316	0.0260689	DS_vs_CTL	SoloTE-Harlequin-int	3.19449e-05	TRUE	Cycling_progenitors	0.892636	0.819095
0.0409639	-0.332193	0.069	0.072	1	DS_vs_CTL	SoloTE-LTR15	0.0425786	TRUE	Cycling_progenitors	0.0529401	0.0560884
0.00533284	-0.46864	0.047	0.051	1	DS_vs_CTL	SoloTE-LTR43	0.0056841	TRUE	Cycling_progenitors	0.083096	0.0632208
9.77892e-05	-0.47771	0.051	0.05	0.105808	DS_vs_CTL	SoloTE-UCON78	0.000122581	TRUE	Cycling_progenitors	0.105317	0.0966633
0.0407815	-0.555716	0.063	0.087	1	DS_vs_CTL	SoloTE-LTR9C	0.042451	TRUE	Cycling_progenitors	0.103328	0.0807964
1.1642e-05	-1.0393	0.068	0.115	0.0125966	DS_vs_CTL	SoloTE-LTR71B	1.58491e-05	TRUE	Cycling_progenitors	0.0451764	0.047317
9.72698e-09	-1.35643	0.053	0.097	1.05246e-05	DS_vs_CTL	SoloTE-HERVK13-int	1.92079e-08	TRUE	Cycling_progenitors	0.0866779	0.0786412

## Sheet: Interneuron_1
p_val	avg_log2FC	pct.1	pct.2	p_val_adj	comparison	gene	FDR	sig	cellsubtype	CTL_expression	DS_expression
1.59572e-06	1.18612	0.055	0.027	0.00172656	DS_vs_CTL	SoloTE-Ricksha	8.60029e-06	TRUE	Interneuron_1	0.213622	0.333721
4.22277e-09	0.951581	0.118	0.072	4.56904e-06	DS_vs_CTL	SoloTE-MER77B	6.25875e-08	TRUE	Interneuron_1	0.381145	0.476847
9.3917e-09	0.70906	0.188	0.135	1.01618e-05	DS_vs_CTL	SoloTE-MLT1E1A	1.18108e-07	TRUE	Interneuron_1	0.680537	1.08659
0.00135714	0.681659	0.053	0.039	1	DS_vs_CTL	SoloTE-Charlie20a	0.00306094	TRUE	Interneuron_1	0.175253	0.254395
0.010859	0.652379	0.063	0.042	1	DS_vs_CTL	SoloTE-MER106A	0.0193626	TRUE	Interneuron_1	0.208964	0.324309
1.33487e-09	0.649929	0.223	0.148	1.44433e-06	DS_vs_CTL	SoloTE-LTR81B	2.76985e-08	TRUE	Interneuron_1	1.16942	1.21531
0.0141324	0.560181	0.056	0.043	1	DS_vs_CTL	SoloTE-L1M3f	0.0241355	TRUE	Interneuron_1	0.211827	0.346428
1.09086e-05	0.532941	0.098	0.079	0.0118031	DS_vs_CTL	SoloTE-MER4E1	4.56553e-05	TRUE	Interneuron_1	0.360474	0.472261
1.30429e-05	0.532474	0.053	0.048	0.0141124	DS_vs_CTL	SoloTE-MER11A	5.25513e-05	TRUE	Interneuron_1	0.226106	0.316756
0.0110112	0.502387	0.094	0.071	1	DS_vs_CTL	SoloTE-Charlie19a	0.0195284	TRUE	Interneuron_1	0.324952	0.435723
0.0329585	0.469933	0.057	0.046	1	DS_vs_CTL	SoloTE-LTR37B	0.0525874	FALSE	Interneuron_1	0.20655	0.241694
0.0206644	0.461217	0.068	0.055	1	DS_vs_CTL	SoloTE-Charlie16a	0.0338962	TRUE	Interneuron_1	0.222019	0.309655
0.0462581	0.451334	0.072	0.058	1	DS_vs_CTL	SoloTE-MER5C	0.0700624	FALSE	Interneuron_1	0.392486	0.505322
0.136509	0.433093	0.057	0.043	1	DS_vs_CTL	SoloTE-Helitron3Na-Mam	0.176484	FALSE	Interneuron_1	0.199157	0.274005
0.0464269	0.402369	0.076	0.063	1	DS_vs_CTL	SoloTE-Looper	0.0700624	FALSE	Interneuron_1	0.293457	0.369413
0.0473977	0.38472	0.05	0.042	1	DS_vs_CTL	SoloTE-LTR37A	0.0712683	FALSE	Interneuron_1	0.211001	0.282867
0.0312907	0.384685	0.057	0.051	1	DS_vs_CTL	SoloTE-HERVH48-int	0.0501376	FALSE	Interneuron_1	0.2415	0.33252
0.00154199	0.370492	0.115	0.102	1	DS_vs_CTL	SoloTE-THE1D-int	0.00340385	TRUE	Interneuron_1	0.50169	0.694974
0.00142925	0.356817	0.109	0.096	1	DS_vs_CTL	SoloTE-MamRep434	0.00320616	TRUE	Interneuron_1	0.361959	0.439307
1.78284e-05	0.345944	0.231	0.202	0.0192903	DS_vs_CTL	SoloTE-MER39	6.78788e-05	TRUE	Interneuron_1	0.686575	0.754608
0.110596	0.344639	0.09	0.073	1	DS_vs_CTL	SoloTE-MLT1G	0.148056	FALSE	Interneuron_1	0.323835	0.474366
0.105217	0.324635	0.064	0.054	1	DS_vs_CTL	SoloTE-LTR103-Mam	0.141769	FALSE	Interneuron_1	0.318036	0.445474
0.029332	0.320885	0.129	0.112	1	DS_vs_CTL	SoloTE-MER44A	0.0473649	TRUE	Interneuron_1	0.495864	0.688247
0.0713164	0.313392	0.09	0.08	1	DS_vs_CTL	SoloTE-Tigger18a	0.102056	FALSE	Interneuron_1	0.323825	0.442332
0.00963501	0.292974	0.055	0.052	1	DS_vs_CTL	SoloTE-LTR82A	0.0177546	TRUE	Interneuron_1	0.201509	0.253021
0.243996	0.291716	0.08	0.068	1	DS_vs_CTL	SoloTE-HERV35I-int	0.293502	FALSE	Interneuron_1	0.321968	0.355005
2.06948e-05	0.290467	0.364	0.325	0.0223918	DS_vs_CTL	SoloTE-ERVL-E-int	7.71739e-05	TRUE	Interneuron_1	1.33461	1.59531
3.36426e-06	0.289843	0.225	0.208	0.00364013	DS_vs_CTL	SoloTE-AluYc3	1.60479e-05	TRUE	Interneuron_1	1.0117	1.09814
0.163361	0.286819	0.057	0.051	1	DS_vs_CTL	SoloTE-LTR79	0.207323	FALSE	Interneuron_1	0.280158	0.390995
2.47999e-06	0.277186	0.387	0.349	0.00268334	DS_vs_CTL	SoloTE-AluYk4	1.23999e-05	TRUE	Interneuron_1	1.84764	1.95631
0.049085	0.274952	0.126	0.112	1	DS_vs_CTL	SoloTE-MLT1M	0.0730117	FALSE	Interneuron_1	0.423209	0.714126
0.0171401	0.273435	0.106	0.1	1	DS_vs_CTL	SoloTE-LTR12C	0.0285669	TRUE	Interneuron_1	0.567307	0.643458
0.000386006	0.269563	0.192	0.178	0.417658	DS_vs_CTL	SoloTE-L1M6	0.000990529	TRUE	Interneuron_1	1.07546	1.69337
6.23257e-08	0.268895	0.316	0.3	6.74364e-05	DS_vs_CTL	SoloTE-MamSINE1	5.62286e-07	TRUE	Interneuron_1	0.834092	1.13486
3.31574e-05	0.26784	0.12	0.116	0.0358763	DS_vs_CTL	SoloTE-THE1A	0.000114694	TRUE	Interneuron_1	0.555047	0.84153
0.487203	0.260513	0.05	0.043	1	DS_vs_CTL	SoloTE-MER31A	0.530589	FALSE	Interneuron_1	0.186918	0.251644
0.363666	0.258612	0.078	0.067	1	DS_vs_CTL	SoloTE-AmnSINE1	0.41691	FALSE	Interneuron_1	0.192393	0.316409
0.000382515	0.258056	0.158	0.15	0.413881	DS_vs_CTL	SoloTE-L1M8	0.000990529	TRUE	Interneuron_1	0.790072	1.18881
0.00373725	0.256779	0.168	0.158	1	DS_vs_CTL	SoloTE-L1PBa	0.00731585	TRUE	Interneuron_1	0.989582	1.28141
1.43858e-05	0.246216	0.192	0.185	0.0155654	DS_vs_CTL	SoloTE-HAL1b	5.68581e-05	FALSE	Interneuron_1	0.932221	1.37387
0.0678635	0.237728	0.135	0.119	1	DS_vs_CTL	SoloTE-CR1-Mam	0.097451	FALSE	Interneuron_1	0.472095	0.686156
0.000182777	0.234219	0.349	0.325	0.197765	DS_vs_CTL	SoloTE-Kanga2-a	0.000526753	FALSE	Interneuron_1	0.540453	0.606934
3.43089e-09	0.232992	0.729	0.723	3.71223e-06	DS_vs_CTL	SoloTE-L1MC1	5.47624e-08	FALSE	Interneuron_1	6.15815	10.972
0.0902404	0.23015	0.064	0.062	1	DS_vs_CTL	SoloTE-LTR78B	0.124418	FALSE	Interneuron_1	0.27988	0.398482
0.0140736	0.230093	0.118	0.114	1	DS_vs_CTL	SoloTE-MER101-int	0.0241345	FALSE	Interneuron_1	0.55279	0.702967
0.0564777	0.229632	0.077	0.073	1	DS_vs_CTL	SoloTE-MamRep38	0.0828207	FALSE	Interneuron_1	0.313631	0.40109
0.234446	0.223072	0.127	0.112	1	DS_vs_CTL	SoloTE-MER102a	0.285323	FALSE	Interneuron_1	0.512208	0.67635
3.85494e-08	0.220773	0.3	0.297	4.17104e-05	DS_vs_CTL	SoloTE-L1ME3E	3.80904e-07	FALSE	Interneuron_1	1.26895	1.95196
0.0012764	0.216488	0.135	0.131	1	DS_vs_CTL	SoloTE-Charlie1	0.00289458	FALSE	Interneuron_1	0.577154	0.759386
0.00568513	0.21464	0.091	0.088	1	DS_vs_CTL	SoloTE-LTR49-int	0.0107732	FALSE	Interneuron_1	0.554885	0.729293
1.00386e-05	0.212934	0.336	0.326	0.0108617	DS_vs_CTL	SoloTE-AluYk2	4.33959e-05	FALSE	Interneuron_1	1.71654	2.15274
0.0738894	0.212245	0.132	0.122	1	DS_vs_CTL	SoloTE-LTR17	0.104656	FALSE	Interneuron_1	0.425704	0.510762
0.179021	0.211835	0.063	0.062	1	DS_vs_CTL	SoloTE-MER45B	0.225816	FALSE	Interneuron_1	0.267755	0.346336
0.0097031	0.20916	0.198	0.186	1	DS_vs_CTL	SoloTE-MER103C	0.0177546	FALSE	Interneuron_1	0.857053	1.31118
0.00971157	0.207905	0.181	0.171	1	DS_vs_CTL	SoloTE-MER113	0.0177546	FALSE	Interneuron_1	0.743866	0.984617
0.656344	0.207236	0.053	0.047	1	DS_vs_CTL	SoloTE-LTR16A	0.689576	FALSE	Interneuron_1	0.261314	0.389998
7.75979e-09	0.204809	0.515	0.509	8.39609e-06	DS_vs_CTL	SoloTE-Tigger3b	1.03881e-07	FALSE	Interneuron_1	3.18241	3.91064
0.168671	0.203981	0.103	0.099	1	DS_vs_CTL	SoloTE-MER1A	0.21341	FALSE	Interneuron_1	0.533974	0.708073
0.193748	0.202449	0.125	0.113	1	DS_vs_CTL	SoloTE-MSTA-int	0.242916	FALSE	Interneuron_1	0.558649	0.838749
0.514118	0.197698	0.1	0.089	1	DS_vs_CTL	SoloTE-MER68	0.552744	FALSE	Interneuron_1	0.409658	0.608985
0.383581	0.195184	0.109	0.098	1	DS_vs_CTL	SoloTE-Cheshire	0.436127	FALSE	Interneuron_1	0.414525	0.565417
0.463265	0.192953	0.054	0.05	1	DS_vs_CTL	SoloTE-Penelope1-Vert	0.510416	FALSE	Interneuron_1	0.168973	0.223293
0.678869	0.192895	0.052	0.046	1	DS_vs_CTL	SoloTE-MLT2B3	0.711441	FALSE	Interneuron_1	0.194258	0.293121
0.0108577	0.18611	0.064	0.064	1	DS_vs_CTL	SoloTE-Arthur1	0.0193626	FALSE	Interneuron_1	0.283925	0.370184
3.51576e-07	0.184518	0.527	0.525	0.000380405	DS_vs_CTL	SoloTE-L1ME3B	2.39187e-06	FALSE	Interneuron_1	3.24343	4.65334
3.72735e-11	0.183512	0.317	0.328	4.03299e-08	DS_vs_CTL	SoloTE-L1ME3F	1.93356e-09	FALSE	Interneuron_1	1.67943	2.91552
2.49986e-08	0.183239	0.867	0.854	2.70485e-05	DS_vs_CTL	SoloTE-AluSc5	2.66011e-07	FALSE	Interneuron_1	9.97114	10.7813
4.53371e-10	0.182623	0.506	0.515	4.90547e-07	DS_vs_CTL	SoloTE-L1MD1	1.38426e-08	FALSE	Interneuron_1	3.35563	5.72151
7.35408e-05	0.176954	0.291	0.283	0.0795711	DS_vs_CTL	SoloTE-L1MEi	0.000231208	FALSE	Interneuron_1	1.44709	2.10421
0.292838	0.176053	0.104	0.099	1	DS_vs_CTL	SoloTE-MER50	0.343299	FALSE	Interneuron_1	0.432828	0.536031
0.0404663	0.175442	0.099	0.097	1	DS_vs_CTL	SoloTE-MamRep605	0.0633718	FALSE	Interneuron_1	0.449045	0.703375
2.65115e-09	0.174782	0.549	0.558	2.86854e-06	DS_vs_CTL	SoloTE-AluYh3	4.4009e-08	FALSE	Interneuron_1	3.28127	3.63502
0.202325	0.172711	0.052	0.051	1	DS_vs_CTL	SoloTE-MER34	0.251392	FALSE	Interneuron_1	0.258305	0.302567
0.131554	0.172249	0.067	0.064	1	DS_vs_CTL	SoloTE-Tigger8	0.171144	FALSE	Interneuron_1	0.246563	0.294022
4.66979e-10	0.171776	0.644	0.661	5.05271e-07	DS_vs_CTL	SoloTE-L1MD2	1.38426e-08	FALSE	Interneuron_1	4.83091	7.06959
0.000660544	0.168889	0.16	0.156	0.714709	DS_vs_CTL	SoloTE-Tigger2b-Pri	0.00160308	FALSE	Interneuron_1	0.705697	0.843066
0.00671238	0.165973	0.135	0.129	1	DS_vs_CTL	SoloTE-Charlie4a	0.0126047	FALSE	Interneuron_1	0.548378	0.74581
0.23281	0.164784	0.074	0.07	1	DS_vs_CTL	SoloTE-MER119	0.284165	FALSE	Interneuron_1	0.307066	0.518802
0.475522	0.151027	0.084	0.081	1	DS_vs_CTL	SoloTE-Charlie18a	0.522068	FALSE	Interneuron_1	0.390705	0.608364
1.31217e-08	0.150762	0.653	0.668	1.41976e-05	DS_vs_CTL	SoloTE-L1MEg	1.51263e-07	FALSE	Interneuron_1	5.84549	8.39954
1.85104e-05	0.150272	0.273	0.273	0.0200282	DS_vs_CTL	SoloTE-L1PA8A	6.98346e-05	FALSE	Interneuron_1	1.31199	2.36171
0.00548738	0.149387	0.845	0.861	1	DS_vs_CTL	SoloTE-L1PA7	0.0104943	FALSE	Interneuron_1	10.1212	17.6726
0.799606	0.148786	0.076	0.071	1	DS_vs_CTL	SoloTE-Tigger3	0.81935	FALSE	Interneuron_1	0.309616	0.40137
0.887475	0.146731	0.052	0.049	1	DS_vs_CTL	SoloTE-MER90a	0.898298	FALSE	Interneuron_1	0.220353	0.279976
0.000331847	0.144399	0.26	0.261	0.359059	DS_vs_CTL	SoloTE-MLT1A	0.000871624	FALSE	Interneuron_1	1.36593	1.68149
2.39794e-11	0.142991	0.407	0.429	2.59457e-08	DS_vs_CTL	SoloTE-L1MA7	1.42163e-09	FALSE	Interneuron_1	2.58821	4.09368
1.88366e-06	0.14288	0.821	0.836	0.00203812	DS_vs_CTL	SoloTE-L1MEc	9.7715e-06	FALSE	Interneuron_1	8.32909	12.9172
0.488398	0.14249	0.058	0.051	1	DS_vs_CTL	SoloTE-MER45A	0.530589	FALSE	Interneuron_1	0.251802	0.339698
0.0809116	0.141144	0.095	0.094	1	DS_vs_CTL	SoloTE-ERV3-16A3-I-int	0.113058	FALSE	Interneuron_1	0.472856	0.693246
0.00251321	0.139027	0.286	0.283	1	DS_vs_CTL	SoloTE-MLT1K	0.00516327	FALSE	Interneuron_1	1.64315	2.38836
0.00013001	0.1389	0.243	0.245	0.140671	DS_vs_CTL	SoloTE-L1MA5A	0.000382654	FALSE	Interneuron_1	1.23145	2.11585
0.00144374	0.138772	0.473	0.455	1	DS_vs_CTL	SoloTE-AluYe5	0.00322125	FALSE	Interneuron_1	2.93684	2.89195
0.0169171	0.134954	0.058	0.061	1	DS_vs_CTL	SoloTE-MamRep137	0.0283088	FALSE	Interneuron_1	0.253383	0.382827
0.0033265	0.134582	0.18	0.181	1	DS_vs_CTL	SoloTE-MLT1I	0.00661572	FALSE	Interneuron_1	1.05931	1.53366
0.839046	0.133383	0.061	0.06	1	DS_vs_CTL	SoloTE-LTR9B	0.855538	FALSE	Interneuron_1	0.22856	0.282069
3.14778e-07	0.133102	0.336	0.35	0.00034059	DS_vs_CTL	SoloTE-L1MA5	2.21412e-06	FALSE	Interneuron_1	1.71533	3.0412
5.02564e-09	0.133061	1	0.996	5.43774e-06	DS_vs_CTL	SoloTE-AluSc8	7.19186e-08	FALSE	Interneuron_1	34.9828	38.0261
6.23459e-11	0.133027	0.998	0.999	6.74583e-08	DS_vs_CTL	SoloTE-AluSc	2.87484e-09	FALSE	Interneuron_1	49.7449	54.5234
3.8051e-10	0.13178	0.243	0.262	4.11712e-07	DS_vs_CTL	SoloTE-L1PB3	1.31593e-08	FALSE	Interneuron_1	1.31327	2.1872
0.000810658	0.130081	0.186	0.185	0.877132	DS_vs_CTL	SoloTE-Tigger17a	0.00191149	FALSE	Interneuron_1	0.802771	1.06572
0.0749992	0.12861	0.133	0.131	1	DS_vs_CTL	SoloTE-MLT1E2	0.105507	FALSE	Interneuron_1	0.683648	0.987433
6.72381e-05	0.122744	0.245	0.253	0.0727516	DS_vs_CTL	SoloTE-MLT1L	0.000213006	FALSE	Interneuron_1	1.38147	1.86136
9.99181e-08	0.122153	0.998	0.998	0.000108111	DS_vs_CTL	SoloTE-AluSx3	8.13059e-07	FALSE	Interneuron_1	38.8975	43.156
2.45263e-05	0.121608	0.265	0.275	0.0265375	DS_vs_CTL	SoloTE-L1MA1	8.92844e-05	FALSE	Interneuron_1	1.43	2.91038
0.00178271	0.121485	0.996	0.998	1	DS_vs_CTL	SoloTE-L2a	0.00387343	FALSE	Interneuron_1	33.4097	52.634
0.000124787	0.120574	0.847	0.854	0.13502	DS_vs_CTL	SoloTE-AluYm1	0.000369905	FALSE	Interneuron_1	8.82938	9.08026
0.000327494	0.118463	0.33	0.33	0.354348	DS_vs_CTL	SoloTE-MER58B	0.000869375	FALSE	Interneuron_1	1.6631	2.20742
0.00789331	0.1179	0.123	0.128	1	DS_vs_CTL	SoloTE-L1MCc	0.0147555	FALSE	Interneuron_1	0.705349	1.12822
1.69262e-05	0.116289	0.924	0.933	0.0183142	DS_vs_CTL	SoloTE-AluSg7	6.50406e-05	FALSE	Interneuron_1	12.7043	13.9756
1.37593e-05	0.116205	0.993	0.992	0.0148876	DS_vs_CTL	SoloTE-AluSq	5.4905e-05	FALSE	Interneuron_1	29.2464	32.6396
8.79813e-10	0.115875	0.589	0.619	9.51958e-07	DS_vs_CTL	SoloTE-L1ME2	1.9217e-08	FALSE	Interneuron_1	4.39628	7.13742
7.56425e-06	0.115338	0.427	0.436	0.00818452	DS_vs_CTL	SoloTE-MLT1C	3.37545e-05	FALSE	Interneuron_1	2.75013	3.86929
0.00184548	0.112415	0.15	0.154	1	DS_vs_CTL	SoloTE-L1ME5	0.0039478	FALSE	Interneuron_1	0.731216	1.28463
0.255696	0.109112	0.143	0.138	1	DS_vs_CTL	SoloTE-MER21B	0.304924	FALSE	Interneuron_1	0.621872	0.961212
1.61688e-09	0.104633	0.36	0.387	1.74946e-06	DS_vs_CTL	SoloTE-L1MB1	3.10774e-08	FALSE	Interneuron_1	1.99731	3.43557
0.0489593	0.104593	0.171	0.17	1	DS_vs_CTL	SoloTE-MLT1F2	0.0730117	FALSE	Interneuron_1	0.975904	1.2535
1.83767e-09	0.104554	0.613	0.647	1.98836e-06	DS_vs_CTL	SoloTE-L1ME3A	3.3158e-08	FALSE	Interneuron_1	4.42598	6.7247
2.37131e-06	0.102116	0.998	0.999	0.00256576	DS_vs_CTL	SoloTE-AluSz6	1.20012e-05	FALSE	Interneuron_1	52.8738	60.3358
0.0104986	0.102071	0.185	0.19	1	DS_vs_CTL	SoloTE-MER20B	0.01906	FALSE	Interneuron_1	0.851428	1.18256
0.188804	0.101288	0.056	0.056	1	DS_vs_CTL	SoloTE-MLT1A0-int	0.237435	FALSE	Interneuron_1	0.265513	0.417509
1.16502e-05	0.100994	0.324	0.335	0.0126055	DS_vs_CTL	SoloTE-MLT1J	4.77904e-05	FALSE	Interneuron_1	1.78782	2.48318
0.00114628	0.099967	0.953	0.956	1	DS_vs_CTL	SoloTE-AluSx4	0.00262821	FALSE	Interneuron_1	16.4275	18.2692
2.83833e-05	0.0998948	0.789	0.81	0.0307107	DS_vs_CTL	SoloTE-L1MC5a	0.000101544	FALSE	Interneuron_1	7.00684	10.026
2.04637e-11	0.0998478	1	1	2.21417e-08	DS_vs_CTL	SoloTE-AluSz	1.4154e-09	FALSE	Interneuron_1	132.869	148.245
2.53131e-05	0.0974461	0.307	0.321	0.0273888	DS_vs_CTL	SoloTE-L1MA6	9.13473e-05	FALSE	Interneuron_1	1.75047	3.17345
8.19676e-10	0.0973718	0.599	0.64	8.8689e-07	DS_vs_CTL	SoloTE-L1MB4	1.88981e-08	FALSE	Interneuron_1	4.26255	6.64909
0.282759	0.0972665	0.119	0.116	1	DS_vs_CTL	SoloTE-MER4D1	0.332422	FALSE	Interneuron_1	0.529581	0.600199
0.159853	0.0967385	0.117	0.116	1	DS_vs_CTL	SoloTE-L4-B-Mam	0.203494	FALSE	Interneuron_1	0.507091	0.708445
0.124799	0.095995	0.084	0.087	1	DS_vs_CTL	SoloTE-OldhAT1	0.164942	FALSE	Interneuron_1	0.357101	0.516156
0.26315	0.0956816	0.057	0.057	1	DS_vs_CTL	SoloTE-LTR37-int	0.312915	FALSE	Interneuron_1	0.248794	0.301207
0.00243072	0.0943841	0.88	0.884	1	DS_vs_CTL	SoloTE-AluSg4	0.00501866	FALSE	Interneuron_1	10.3445	11.3836
4.71026e-07	0.0939819	1	0.999	0.000509651	DS_vs_CTL	SoloTE-AluSq2	3.00732e-06	FALSE	Interneuron_1	79.6857	86.6684
3.49094e-07	0.0936793	0.545	0.568	0.00037772	DS_vs_CTL	SoloTE-MLT1D	2.39187e-06	FALSE	Interneuron_1	3.46541	4.5309
0.00659294	0.0935962	0.174	0.18	1	DS_vs_CTL	SoloTE-THE1B-int	0.0124367	FALSE	Interneuron_1	0.923728	1.46537
7.92301e-07	0.0930777	1	1	0.000857269	DS_vs_CTL	SoloTE-AluSp	4.66383e-06	FALSE	Interneuron_1	81.4726	89.2272
0.000560192	0.0928761	0.177	0.185	0.606128	DS_vs_CTL	SoloTE-Tigger2a	0.00137562	FALSE	Interneuron_1	0.848608	1.10533
0.0897513	0.0925525	0.16	0.16	1	DS_vs_CTL	SoloTE-L1M7	0.124418	FALSE	Interneuron_1	0.8512	1.28121
0.116092	0.0924586	0.055	0.056	1	DS_vs_CTL	SoloTE-MER34A	0.154914	FALSE	Interneuron_1	0.280805	0.345006
1.50909e-11	0.0923284	1	1	1.63283e-08	DS_vs_CTL	SoloTE-AluY	1.25254e-09	FALSE	Interneuron_1	194.888	202.255
0.038137	0.0904896	0.058	0.064	1	DS_vs_CTL	SoloTE-LTR78	0.0599502	FALSE	Interneuron_1	0.302114	0.49403
0.762109	0.0900485	0.05	0.049	1	DS_vs_CTL	SoloTE-LTR49	0.786754	FALSE	Interneuron_1	0.21008	0.263053
0.531143	0.0890332	0.057	0.057	1	DS_vs_CTL	SoloTE-MLT2B1	0.569572	FALSE	Interneuron_1	0.28647	0.42547
0.0034083	0.0882482	0.163	0.167	1	DS_vs_CTL	SoloTE-MLT1G3	0.00673546	FALSE	Interneuron_1	0.749706	0.876738
2.67525e-08	0.0862612	1	1	2.89463e-05	DS_vs_CTL	SoloTE-AluSx1	2.77558e-07	FALSE	Interneuron_1	157.501	172.969
4.3684e-05	0.0858512	0.999	0.999	0.0472661	DS_vs_CTL	SoloTE-AluSg	0.000146201	FALSE	Interneuron_1	52.9186	57.7848
0.0521665	0.0847265	0.15	0.154	1	DS_vs_CTL	SoloTE-AluYb9	0.077043	FALSE	Interneuron_1	0.96892	0.981621
1.17461e-05	0.0846255	0.492	0.515	0.0127093	DS_vs_CTL	SoloTE-L1MCa	4.77904e-05	FALSE	Interneuron_1	3.33096	4.72708
0.235652	0.0845456	0.109	0.11	1	DS_vs_CTL	SoloTE-L1MEj	0.285953	FALSE	Interneuron_1	0.511899	0.855615
0.322986	0.0832742	0.075	0.076	1	DS_vs_CTL	SoloTE-MLT1H1	0.372332	FALSE	Interneuron_1	0.392763	0.511931
1.57694e-05	0.0823197	1	1	0.0170624	DS_vs_CTL	SoloTE-AluJb	6.17385e-05	FALSE	Interneuron_1	115.367	130.694
1.02999e-08	0.0819857	0.747	0.788	1.11445e-05	DS_vs_CTL	SoloTE-L1MB8	1.25719e-07	FALSE	Interneuron_1	7.0022	10.2539
0.539582	0.0817996	0.154	0.15	1	DS_vs_CTL	SoloTE-L1M4a2	0.577131	FALSE	Interneuron_1	0.668815	1.24614
0.305629	0.0799447	0.084	0.085	1	DS_vs_CTL	SoloTE-MER53	0.355283	FALSE	Interneuron_1	0.431773	0.601794
1.35051e-07	0.0789999	1	1	0.000146125	DS_vs_CTL	SoloTE-AluSx	1.01902e-06	FALSE	Interneuron_1	152.018	165.188
0.707942	0.0789351	0.074	0.073	1	DS_vs_CTL	SoloTE-MLT1J1	0.738163	FALSE	Interneuron_1	0.332393	0.518483
0.456928	0.0773008	0.074	0.074	1	DS_vs_CTL	SoloTE-MER44B	0.507564	FALSE	Interneuron_1	0.272322	0.480506
0.0137244	0.0768053	0.161	0.167	1	DS_vs_CTL	SoloTE-MER102b	0.0236333	FALSE	Interneuron_1	0.760023	1.03105
4.91677e-05	0.0765856	1	0.999	0.0531995	DS_vs_CTL	SoloTE-AluJr	0.000160666	FALSE	Interneuron_1	65.0634	72.5239
3.35637e-08	0.075854	0.609	0.658	3.6316e-05	DS_vs_CTL	SoloTE-L1MA3	3.39731e-07	FALSE	Interneuron_1	4.77854	8.09659
0.00065546	0.0722187	1	1	0.709208	DS_vs_CTL	SoloTE-AluJo	0.00160009	FALSE	Interneuron_1	59.3541	65.8885
0.010871	0.0716856	0.188	0.195	1	DS_vs_CTL	SoloTE-MLT1F	0.0193626	FALSE	Interneuron_1	0.846538	1.04629
2.93601e-06	0.0714784	0.361	0.381	0.00317676	DS_vs_CTL	SoloTE-L1ME4c	1.43346e-05	FALSE	Interneuron_1	1.92515	2.83934
0.413815	0.0700876	0.068	0.07	1	DS_vs_CTL	SoloTE-LTR5B	0.466666	FALSE	Interneuron_1	0.3497	0.361298
0.427568	0.0689853	0.939	0.943	1	DS_vs_CTL	SoloTE-L2b	0.478277	FALSE	Interneuron_1	13.1462	20.7618
0.00321547	0.0689552	0.933	0.952	1	DS_vs_CTL	SoloTE-L1M5	0.00647777	FALSE	Interneuron_1	14.9359	20.0054
0.000380093	0.0663493	0.275	0.284	0.41126	DS_vs_CTL	SoloTE-Tigger2	0.000990529	FALSE	Interneuron_1	1.41416	1.95067
0.000328896	0.0656839	0.211	0.224	0.355866	DS_vs_CTL	SoloTE-MER21C	0.000869375	FALSE	Interneuron_1	1.15627	1.6344
0.0942185	0.0655857	0.894	0.91	1	DS_vs_CTL	SoloTE-L1MB7	0.128786	FALSE	Interneuron_1	10.5498	16.4218
0.000386664	0.0639685	0.484	0.496	0.418371	DS_vs_CTL	SoloTE-AluSq4	0.000990529	FALSE	Interneuron_1	2.82101	3.00094
1.0873e-05	0.0638257	0.572	0.604	0.0117646	DS_vs_CTL	SoloTE-L1MA4	4.56553e-05	FALSE	Interneuron_1	4.20235	7.51484
0.00352933	0.0625141	0.193	0.201	1	DS_vs_CTL	SoloTE-Charlie2b	0.00694157	FALSE	Interneuron_1	0.963731	1.1796
9.49551e-07	0.0616841	0.385	0.414	0.00102741	DS_vs_CTL	SoloTE-AluSq10	5.47311e-06	FALSE	Interneuron_1	2.34918	2.44734
0.551182	0.0612654	0.089	0.088	1	DS_vs_CTL	SoloTE-MSTC	0.588022	FALSE	Interneuron_1	0.417901	0.673413
0.000123384	0.0589713	0.8	0.838	0.133502	DS_vs_CTL	SoloTE-HAL1	0.000368377	FALSE	Interneuron_1	8.03312	12.9386
2.01563e-06	0.0589381	0.659	0.692	0.00218091	DS_vs_CTL	SoloTE-AluYc	1.0327e-05	FALSE	Interneuron_1	5.4862	5.81515
0.709703	0.0585074	0.103	0.102	1	DS_vs_CTL	SoloTE-ERVL-B4-int	0.738163	FALSE	Interneuron_1	0.47454	0.64158
0.000689558	0.0584241	0.236	0.247	0.746102	DS_vs_CTL	SoloTE-Charlie4z	0.00166376	FALSE	Interneuron_1	1.12456	1.42487
6.55784e-09	0.0584236	0.551	0.596	7.09558e-06	DS_vs_CTL	SoloTE-L1MB5	9.07168e-08	FALSE	Interneuron_1	4.05285	6.14001
8.39306e-06	0.0566299	0.152	0.169	0.0090813	DS_vs_CTL	SoloTE-MSTB1	3.70545e-05	FALSE	Interneuron_1	0.705828	0.998308
0.650964	0.0532177	0.138	0.136	1	DS_vs_CTL	SoloTE-MLT1H2	0.68566	FALSE	Interneuron_1	0.618722	0.848114
0.932138	0.0528327	0.087	0.084	1	DS_vs_CTL	SoloTE-L1MCb	0.93439	FALSE	Interneuron_1	0.425126	0.558034
9.54277e-08	0.0525081	0.492	0.53	0.000103253	DS_vs_CTL	SoloTE-L1ME3Cz	8.08214e-07	FALSE	Interneuron_1	3.07265	4.5478
0.000500536	0.0477925	0.18	0.195	0.54158	DS_vs_CTL	SoloTE-MER112	0.00124385	FALSE	Interneuron_1	0.953395	1.28469
0.120819	0.0475942	0.209	0.216	1	DS_vs_CTL	SoloTE-L1M4a1	0.160705	FALSE	Interneuron_1	1.17535	1.62632
0.452918	0.0471956	0.055	0.058	1	DS_vs_CTL	SoloTE-HERV17-int	0.505271	FALSE	Interneuron_1	0.243114	0.375493
0.000194547	0.0427941	0.171	0.185	0.2105	DS_vs_CTL	SoloTE-MER1B	0.000552993	FALSE	Interneuron_1	0.802481	1.1956
0.000256224	0.0415791	0.509	0.528	0.277234	DS_vs_CTL	SoloTE-Charlie1a	0.000699558	FALSE	Interneuron_1	2.97635	3.75921
9.29456e-08	0.0410651	0.375	0.409	0.000100567	DS_vs_CTL	SoloTE-L1MC	8.03592e-07	FALSE	Interneuron_1	2.32513	3.11464
0.0623801	0.040263	0.122	0.128	1	DS_vs_CTL	SoloTE-LTR33	0.0902012	FALSE	Interneuron_1	0.646744	0.952004
0.99093	0.0381794	0.05	0.05	1	DS_vs_CTL	SoloTE-MER4D	0.99093	FALSE	Interneuron_1	0.211893	0.239876
3.45436e-06	0.0372318	0.398	0.426	0.00373761	DS_vs_CTL	SoloTE-MER58A	1.62904e-05	FALSE	Interneuron_1	2.43874	3.295
9.88148e-08	0.0370101	0.732	0.791	0.000106918	DS_vs_CTL	SoloTE-L1MB3	8.13059e-07	FALSE	Interneuron_1	6.85782	11.7936
0.000711074	0.0336147	0.253	0.271	0.769382	DS_vs_CTL	SoloTE-Tigger19b	0.00170575	FALSE	Interneuron_1	1.15607	1.34299
0.0440146	0.0327645	0.898	0.92	1	DS_vs_CTL	SoloTE-L1ME1	0.0676489	FALSE	Interneuron_1	11.7908	18.7876
0.145179	0.0323593	0.091	0.096	1	DS_vs_CTL	SoloTE-AluYa8	0.18653	FALSE	Interneuron_1	0.482543	0.430323
1.64747e-09	0.0313117	0.31	0.349	1.78257e-06	DS_vs_CTL	SoloTE-HAL1ME	3.10774e-08	FALSE	Interneuron_1	1.90599	2.92631
0.298574	0.0302731	0.152	0.156	1	DS_vs_CTL	SoloTE-AluYi6	0.349037	FALSE	Interneuron_1	0.742693	0.727157
0.253296	0.0301111	0.99	0.991	1	DS_vs_CTL	SoloTE-MIRb	0.302934	FALSE	Interneuron_1	24.669	35.1648
1.14284e-07	0.0299712	0.718	0.767	0.000123655	DS_vs_CTL	SoloTE-L1MEd	8.94865e-07	FALSE	Interneuron_1	6.59295	9.71909
0.00156111	0.026528	0.774	0.808	1	DS_vs_CTL	SoloTE-L3	0.00342783	FALSE	Interneuron_1	6.94463	10.7018
1.71671e-06	0.0256766	0.377	0.405	0.00185749	DS_vs_CTL	SoloTE-MLT1B	9.1338e-06	FALSE	Interneuron_1	2.14598	3.08708
0.877429	0.0240032	0.067	0.068	1	DS_vs_CTL	SoloTE-MER4B-int	0.890301	FALSE	Interneuron_1	0.29705	0.34966
4.39153e-06	0.0220867	0.52	0.553	0.00475164	DS_vs_CTL	SoloTE-L1MD	2.04774e-05	FALSE	Interneuron_1	3.33213	4.14098
0.135137	0.021729	0.132	0.137	1	DS_vs_CTL	SoloTE-L1MEh	0.175256	FALSE	Interneuron_1	0.710334	0.987472
0.000848874	0.0214396	0.284	0.303	0.918482	DS_vs_CTL	SoloTE-Alu	0.0019903	FALSE	Interneuron_1	1.54565	1.56221
0.129785	0.0200189	0.064	0.068	1	DS_vs_CTL	SoloTE-L1MEg1	0.170445	FALSE	Interneuron_1	0.272554	0.395289
1.07218e-06	0.019814	0.407	0.448	0.0011601	DS_vs_CTL	SoloTE-L1MA4A	6.04641e-06	FALSE	Interneuron_1	2.6354	4.78142
4.54876e-08	0.0173262	0.542	0.595	4.92175e-05	DS_vs_CTL	SoloTE-L1MB2	4.19496e-07	FALSE	Interneuron_1	3.88423	6.40301
0.223649	0.0168776	0.056	0.059	1	DS_vs_CTL	SoloTE-MER63D	0.274443	FALSE	Interneuron_1	0.245603	0.289956
3.08016e-06	0.0167018	0.351	0.383	0.00333274	DS_vs_CTL	SoloTE-L1M4c	1.48636e-05	FALSE	Interneuron_1	2.1272	2.88871
0.000161827	0.0164588	0.28	0.305	0.175097	DS_vs_CTL	SoloTE-L1ME3D	0.000469637	FALSE	Interneuron_1	1.53217	2.15001
1.92304e-07	0.0161894	0.517	0.56	0.000208073	DS_vs_CTL	SoloTE-L1MC2	1.40011e-06	FALSE	Interneuron_1	3.24506	4.94581
1.74959e-06	0.0158659	0.827	0.88	0.00189305	DS_vs_CTL	SoloTE-L1MC4	9.19088e-06	FALSE	Interneuron_1	9.46729	14.4133
0.813203	0.0157998	0.075	0.077	1	DS_vs_CTL	SoloTE-LTR16C	0.83123	FALSE	Interneuron_1	0.383912	0.628033
1.61456e-05	0.0146191	0.754	0.802	0.0174696	DS_vs_CTL	SoloTE-L1ME4a	6.26209e-05	FALSE	Interneuron_1	7.29982	10.4188
0.903345	0.0139463	0.064	0.064	1	DS_vs_CTL	SoloTE-MLT2A1	0.911326	FALSE	Interneuron_1	0.295192	0.398634
0.617569	0.0115526	0.054	0.056	1	DS_vs_CTL	SoloTE-THE1A-int	0.657156	FALSE	Interneuron_1	0.284282	0.478383
0.0001173	0.0107054	0.61	0.653	0.126919	DS_vs_CTL	SoloTE-L1MEf	0.000355326	FALSE	Interneuron_1	4.73008	6.94582
0.00222288	0.00984351	0.175	0.189	1	DS_vs_CTL	SoloTE-Tigger3a	0.00468272	FALSE	Interneuron_1	0.850236	1.36352
0.463679	0.00790344	0.128	0.131	1	DS_vs_CTL	SoloTE-L1MEb	0.510416	FALSE	Interneuron_1	0.564729	0.840156
2.74065e-10	0.00616569	0.503	0.569	2.96538e-07	DS_vs_CTL	SoloTE-L1MC4a	1.03397e-08	FALSE	Interneuron_1	3.45157	5.71215
0.923463	0.006101	0.072	0.072	1	DS_vs_CTL	SoloTE-HERVL-int	0.927935	FALSE	Interneuron_1	0.355042	0.560046
0.20899	0.0053539	0.08	0.086	1	DS_vs_CTL	SoloTE-Charlie15b	0.258898	FALSE	Interneuron_1	0.319186	0.421532
0.793876	0.00530875	0.054	0.053	1	DS_vs_CTL	SoloTE-L1MDb	0.815492	FALSE	Interneuron_1	0.255358	0.373532
0.014273	0.00464683	0.218	0.234	1	DS_vs_CTL	SoloTE-MLT1A1	0.0242758	FALSE	Interneuron_1	1.04259	1.25546
4.70714e-05	0.00453748	0.238	0.263	0.0509313	DS_vs_CTL	SoloTE-MSTB	0.000156277	FALSE	Interneuron_1	1.28095	1.72497
0.0002764	0.00248765	0.63	0.679	0.299065	DS_vs_CTL	SoloTE-L1PA6	0.000744844	FALSE	Interneuron_1	5.3977	9.12062
0.020394	0.00240785	0.052	0.06	1	DS_vs_CTL	SoloTE-MER4B	0.0335853	FALSE	Interneuron_1	0.251236	0.338267
0.000506869	0.0022714	0.131	0.15	0.548432	DS_vs_CTL	SoloTE-Tigger7	0.00125209	FALSE	Interneuron_1	0.596324	0.803797
0.303265	0.00159717	0.098	0.094	1	DS_vs_CTL	SoloTE-MER57A-int	0.353525	FALSE	Interneuron_1	0.49142	0.622162
0.00330852	0.00158392	0.23	0.248	1	DS_vs_CTL	SoloTE-L1MA10	0.00661572	FALSE	Interneuron_1	0.981322	1.69512
0.0876014	0.0013659	0.125	0.135	1	DS_vs_CTL	SoloTE-MARNA	0.121995	FALSE	Interneuron_1	0.525019	0.701962
0.0589059	-0.000190919	0.058	0.064	1	DS_vs_CTL	SoloTE-LTR54	0.0860773	FALSE	Interneuron_1	0.257588	0.322426
0.0420818	-0.000603551	0.086	0.095	1	DS_vs_CTL	SoloTE-MER94	0.0651639	FALSE	Interneuron_1	0.416766	0.64379
0.00149329	-0.00142185	0.582	0.616	1	DS_vs_CTL	SoloTE-FRAM	0.00331398	FALSE	Interneuron_1	4.21324	4.39415
4.23025e-05	-0.00153336	0.701	0.749	0.0457713	DS_vs_CTL	SoloTE-L1ME4b	0.000142728	FALSE	Interneuron_1	6.10966	8.50414
0.19547	-0.00175324	0.101	0.108	1	DS_vs_CTL	SoloTE-MLT1J2	0.244338	FALSE	Interneuron_1	0.836692	1.01948
0.481694	-0.00421601	0.122	0.126	1	DS_vs_CTL	SoloTE-Harlequin-int	0.52606	FALSE	Interneuron_1	0.892636	0.819095
0.00192368	-0.00572711	0.582	0.616	1	DS_vs_CTL	SoloTE-MER5A	0.00409399	FALSE	Interneuron_1	4.21348	5.77595
1.07816e-06	-0.00585259	0.441	0.483	0.00116656	DS_vs_CTL	SoloTE-AluYf1	6.04641e-06	FALSE	Interneuron_1	3.02719	3.09015
0.322833	-0.00720632	0.93	0.942	1	DS_vs_CTL	SoloTE-FLAM-C	0.372332	FALSE	Interneuron_1	13.7188	14.5199
2.08276e-05	-0.0084121	0.496	0.543	0.0225355	DS_vs_CTL	SoloTE-L1MA2	7.71739e-05	FALSE	Interneuron_1	3.56858	6.48243
0.0114947	-0.00875912	0.132	0.145	1	DS_vs_CTL	SoloTE-AluYk11	0.0202131	FALSE	Interneuron_1	0.634469	0.652968
7.70867e-07	-0.0140371	0.551	0.609	0.000834078	DS_vs_CTL	SoloTE-L1PA8	4.63637e-06	FALSE	Interneuron_1	4.53595	7.5676
0.0349883	-0.0143437	0.14	0.152	1	DS_vs_CTL	SoloTE-MER47A	0.0552097	FALSE	Interneuron_1	0.41008	0.629941
0.0335555	-0.0147275	0.247	0.265	1	DS_vs_CTL	SoloTE-AluYg6	0.0531509	FALSE	Interneuron_1	1.40899	1.441
1.6404e-07	-0.0173292	0.402	0.448	0.000177491	DS_vs_CTL	SoloTE-L1PA17	1.21565e-06	FALSE	Interneuron_1	2.46421	3.77998
0.000122611	-0.0178518	0.379	0.412	0.132665	DS_vs_CTL	SoloTE-MER2	0.000368377	FALSE	Interneuron_1	2.10353	2.97195
0.00390303	-0.0181416	0.071	0.082	1	DS_vs_CTL	SoloTE-Charlie25	0.00760449	FALSE	Interneuron_1	0.304057	0.392374
0.000139026	-0.0184498	0.79	0.838	0.150426	DS_vs_CTL	SoloTE-MIR3	0.000406307	FALSE	Interneuron_1	7.97055	11.2343
9.97053e-06	-0.0186611	0.583	0.633	0.0107881	DS_vs_CTL	SoloTE-L1ME3G	4.33959e-05	FALSE	Interneuron_1	4.11562	6.00776
0.336613	-0.0187064	0.122	0.129	1	DS_vs_CTL	SoloTE-MER81	0.386965	FALSE	Interneuron_1	0.677318	0.739243
0.00044626	-0.0188939	0.792	0.829	0.482854	DS_vs_CTL	SoloTE-AluYa5	0.00111565	FALSE	Interneuron_1	8.87736	9.16109
0.0107903	-0.0196005	0.177	0.194	1	DS_vs_CTL	SoloTE-MSTD	0.0193626	FALSE	Interneuron_1	1.0024	1.59056
0.000394802	-0.0199572	0.173	0.195	0.427175	DS_vs_CTL	SoloTE-MER41A	0.00100517	FALSE	Interneuron_1	0.89402	0.931704
4.75819e-05	-0.0201132	0.666	0.723	0.0514837	DS_vs_CTL	SoloTE-L1PA16	0.000156718	FALSE	Interneuron_1	5.68962	10.1279
0.00010749	-0.020136	0.727	0.777	0.116304	DS_vs_CTL	SoloTE-L1MC5	0.000330107	FALSE	Interneuron_1	6.4992	9.17715
0.0660218	-0.0218166	0.058	0.064	1	DS_vs_CTL	SoloTE-BLACKJACK	0.0951356	FALSE	Interneuron_1	0.319657	0.455314
2.9086e-05	-0.0232617	0.377	0.416	0.031471	DS_vs_CTL	SoloTE-L1M3	0.000103168	FALSE	Interneuron_1	2.28777	3.06171
0.0105175	-0.0233922	0.135	0.147	1	DS_vs_CTL	SoloTE-HSMAR2	0.01906	FALSE	Interneuron_1	0.658448	0.979539
0.904739	-0.0240584	0.053	0.056	1	DS_vs_CTL	SoloTE-MER61-int	0.911326	FALSE	Interneuron_1	0.323605	0.397881
0.0735653	-0.0251754	0.164	0.175	1	DS_vs_CTL	SoloTE-Tigger15a	0.104553	FALSE	Interneuron_1	0.713755	1.13713
0.000204658	-0.0261273	0.273	0.301	0.22144	DS_vs_CTL	SoloTE-THE1D	0.000570798	FALSE	Interneuron_1	1.75155	2.6216
0.0209896	-0.02767	0.761	0.794	1	DS_vs_CTL	SoloTE-Tigger1	0.034294	FALSE	Interneuron_1	6.52378	8.70001
1.4293e-06	-0.0297985	0.89	0.936	0.00154651	DS_vs_CTL	SoloTE-L2	7.80475e-06	FALSE	Interneuron_1	12.2359	20.428
5.37627e-10	-0.031406	0.292	0.339	5.81713e-07	DS_vs_CTL	SoloTE-MER5A1	1.39482e-08	FALSE	Interneuron_1	1.73886	2.56971
0.00157437	-0.0321422	0.97	0.981	1	DS_vs_CTL	SoloTE-MIR	0.00343875	FALSE	Interneuron_1	20.7015	29.6986
0.000316331	-0.0327397	0.202	0.224	0.342271	DS_vs_CTL	SoloTE-MIR1-Amn	0.000846952	FALSE	Interneuron_1	1.00296	1.42615
7.53993e-05	-0.033293	0.399	0.437	0.081582	DS_vs_CTL	SoloTE-MER20	0.000235268	FALSE	Interneuron_1	2.66442	3.96409
1.22162e-06	-0.0341488	0.251	0.287	0.0013218	DS_vs_CTL	SoloTE-MER30	6.75964e-06	FALSE	Interneuron_1	1.56851	1.97559
2.62472e-06	-0.0351938	0.449	0.499	0.00283995	DS_vs_CTL	SoloTE-L1PB4	1.29674e-05	FALSE	Interneuron_1	2.55988	3.90718
0.00896021	-0.0361203	0.084	0.094	1	DS_vs_CTL	SoloTE-MER46C	0.0166004	FALSE	Interneuron_1	0.380881	0.596985
0.749432	-0.0363349	0.063	0.067	1	DS_vs_CTL	SoloTE-LTR13	0.775596	FALSE	Interneuron_1	0.355393	0.360475
0.0547941	-0.0384286	0.187	0.201	1	DS_vs_CTL	SoloTE-Tigger13a	0.0806367	FALSE	Interneuron_1	0.923066	1.21468
8.81016e-05	-0.040711	0.361	0.398	0.095326	DS_vs_CTL	SoloTE-MER3	0.000272852	FALSE	Interneuron_1	2.03512	2.62326
0.224183	-0.0418858	0.953	0.957	1	DS_vs_CTL	SoloTE-AluJr4	0.274443	FALSE	Interneuron_1	15.1956	17.0374
0.00443548	-0.0420822	0.371	0.4	1	DS_vs_CTL	SoloTE-MLT1A0	0.0085615	FALSE	Interneuron_1	2.26934	3.13748
0.000190061	-0.0431869	0.584	0.634	0.205646	DS_vs_CTL	SoloTE-L1MA9	0.000543968	FALSE	Interneuron_1	4.53445	7.48945
3.15642e-05	-0.0446463	0.436	0.481	0.0341525	DS_vs_CTL	SoloTE-FAM	0.00011101	FALSE	Interneuron_1	2.2917	2.51663
3.31646e-05	-0.0472859	0.168	0.193	0.0358841	DS_vs_CTL	SoloTE-HAL1M8	0.000114694	FALSE	Interneuron_1	0.901785	1.42368
5.61338e-07	-0.0486511	0.483	0.539	0.000607367	DS_vs_CTL	SoloTE-L1M2	3.50113e-06	FALSE	Interneuron_1	3.92321	5.39488
6.64181e-05	-0.049544	0.218	0.25	0.0718644	DS_vs_CTL	SoloTE-THE1C	0.000212027	FALSE	Interneuron_1	1.17959	1.8031
0.379648	-0.0496652	0.064	0.071	1	DS_vs_CTL	SoloTE-Arthur1B	0.43284	FALSE	Interneuron_1	0.307488	0.422844
0.681702	-0.0503718	0.061	0.065	1	DS_vs_CTL	SoloTE-Charlie15a	0.71261	FALSE	Interneuron_1	0.2954	0.422985
4.37034e-07	-0.0541466	0.495	0.552	0.000472871	DS_vs_CTL	SoloTE-L1PREC2	2.83389e-06	FALSE	Interneuron_1	3.67077	5.50929
0.388759	-0.0550142	0.08	0.088	1	DS_vs_CTL	SoloTE-MLT1F1	0.440806	FALSE	Interneuron_1	0.362985	0.471122
0.390287	-0.0559057	0.08	0.089	1	DS_vs_CTL	SoloTE-LTR8	0.441333	FALSE	Interneuron_1	0.389586	0.480632
1.2511e-07	-0.0568235	0.452	0.509	0.000135369	DS_vs_CTL	SoloTE-THE1B	9.61494e-07	FALSE	Interneuron_1	3.99338	5.15998
4.47063e-08	-0.0579784	0.413	0.47	4.83722e-05	DS_vs_CTL	SoloTE-MSTA	4.19496e-07	FALSE	Interneuron_1	2.80255	3.88109
0.720853	-0.0600416	0.076	0.081	1	DS_vs_CTL	SoloTE-L1PA15-16	0.747885	FALSE	Interneuron_1	0.403693	0.499175
0.0131816	-0.0606864	0.123	0.139	1	DS_vs_CTL	SoloTE-MER58C	0.0228885	FALSE	Interneuron_1	0.601992	0.802932
0.000406979	-0.0610766	0.678	0.726	0.440351	DS_vs_CTL	SoloTE-AluYb8	0.00102986	FALSE	Interneuron_1	6.15294	5.90894
0.457998	-0.0616395	0.096	0.105	1	DS_vs_CTL	SoloTE-MLT1N2	0.507564	FALSE	Interneuron_1	0.531885	0.721087
0.0759521	-0.0616957	0.042	0.05	1	DS_vs_CTL	SoloTE-HERVIP10B3-int	0.106487	FALSE	Interneuron_1	0.229984	0.245428
0.0187196	-0.063469	0.098	0.111	1	DS_vs_CTL	SoloTE-MER102c	0.0310745	FALSE	Interneuron_1	0.450741	0.661238
1.06928e-11	-0.0643243	0.458	0.536	1.15697e-08	DS_vs_CTL	SoloTE-L1PA11	1.10938e-09	FALSE	Interneuron_1	3.03043	5.26764
0.00220763	-0.0645498	0.204	0.228	1	DS_vs_CTL	SoloTE-Tigger4a	0.00467433	FALSE	Interneuron_1	1.07872	1.4932
0.151139	-0.0667417	0.067	0.075	1	DS_vs_CTL	SoloTE-MLT1G1	0.193589	FALSE	Interneuron_1	0.402869	0.557423
0.282493	-0.0705539	0.079	0.088	1	DS_vs_CTL	SoloTE-MER31-int	0.332422	FALSE	Interneuron_1	0.395781	0.422483
6.19353e-06	-0.0740206	0.867	0.914	0.0067014	DS_vs_CTL	SoloTE-MIRc	2.79382e-05	FALSE	Interneuron_1	10.9274	15.4738
4.11748e-08	-0.0741888	0.655	0.726	4.45511e-05	DS_vs_CTL	SoloTE-FLAM-A	3.97384e-07	FALSE	Interneuron_1	5.46301	6.03799
3.73312e-05	-0.0760969	0.377	0.426	0.0403924	DS_vs_CTL	SoloTE-AluYk3	0.000128037	FALSE	Interneuron_1	2.30684	2.38561
2.22494e-08	-0.0764334	0.406	0.468	2.40738e-05	DS_vs_CTL	SoloTE-MER5B	2.49554e-07	FALSE	Interneuron_1	2.68071	3.76484
0.0615107	-0.0794444	0.099	0.113	1	DS_vs_CTL	SoloTE-MER41B	0.0892551	FALSE	Interneuron_1	0.572589	0.705249
7.27649e-07	-0.0806059	0.451	0.516	0.000787316	DS_vs_CTL	SoloTE-L1ME2z	4.4408e-06	FALSE	Interneuron_1	2.72539	3.99764
0.01296	-0.0810351	0.144	0.163	1	DS_vs_CTL	SoloTE-MADE1	0.0225983	FALSE	Interneuron_1	0.7213	0.905948
0.00468181	-0.0832103	0.24	0.268	1	DS_vs_CTL	SoloTE-MamRTE1	0.00899515	FALSE	Interneuron_1	1.1084	1.74805
2.44836e-08	-0.0841591	0.97	0.986	2.64912e-05	DS_vs_CTL	SoloTE-L2c	2.66011e-07	FALSE	Interneuron_1	21.3678	34.3931
0.782679	-0.0843557	0.058	0.062	1	DS_vs_CTL	SoloTE-HERVIP10FH-int	0.805985	FALSE	Interneuron_1	0.296342	0.350366
2.20372e-09	-0.0844864	0.402	0.472	2.38442e-06	DS_vs_CTL	SoloTE-L1ME3	3.81059e-08	FALSE	Interneuron_1	2.89402	4.39091
0.513443	-0.0864758	0.08	0.088	1	DS_vs_CTL	SoloTE-MLT2D	0.552744	FALSE	Interneuron_1	0.417431	0.53641
0.0259504	-0.0867807	0.206	0.231	1	DS_vs_CTL	SoloTE-L4-A-Mam	0.0420681	FALSE	Interneuron_1	0.934108	1.36862
0.000208655	-0.0893185	0.821	0.868	0.225765	DS_vs_CTL	SoloTE-L1M4	0.000577279	FALSE	Interneuron_1	9.19328	12.1381
0.131458	-0.0927901	0.06	0.07	1	DS_vs_CTL	SoloTE-MER110-int	0.171144	FALSE	Interneuron_1	0.340752	0.286072
0.638972	-0.0945926	0.047	0.053	1	DS_vs_CTL	SoloTE-MER77	0.676463	FALSE	Interneuron_1	0.228918	0.293264
0.0952739	-0.0969136	0.048	0.058	1	DS_vs_CTL	SoloTE-Tigger6a	0.129335	FALSE	Interneuron_1	0.214037	0.324209
0.140879	-0.09748	0.109	0.123	1	DS_vs_CTL	SoloTE-MLT2B4	0.181567	FALSE	Interneuron_1	0.640626	0.834738
0.126849	-0.0975692	0.146	0.163	1	DS_vs_CTL	SoloTE-Charlie1b	0.167119	FALSE	Interneuron_1	0.80914	1.14262
0.0122996	-0.102279	0.137	0.159	1	DS_vs_CTL	SoloTE-Charlie2a	0.0215373	FALSE	Interneuron_1	0.644352	0.788803
0.0153967	-0.103971	0.259	0.29	1	DS_vs_CTL	SoloTE-MLT1H	0.0259742	FALSE	Interneuron_1	0.980501	1.26372
0.0112697	-0.107807	0.619	0.665	1	DS_vs_CTL	SoloTE-AluYj4	0.0199017	FALSE	Interneuron_1	4.99139	4.8426
0.866254	-0.11113	0.049	0.052	1	DS_vs_CTL	SoloTE-Charlie23a	0.881117	FALSE	Interneuron_1	0.196796	0.270456
0.000431447	-0.113112	0.163	0.195	0.466825	DS_vs_CTL	SoloTE-Charlie5	0.00108515	FALSE	Interneuron_1	0.767718	0.883771
0.280245	-0.122302	0.084	0.095	1	DS_vs_CTL	SoloTE-Tigger19a	0.331343	FALSE	Interneuron_1	0.446773	0.699575
0.0446805	-0.124602	0.075	0.09	1	DS_vs_CTL	SoloTE-MER44C	0.0681706	FALSE	Interneuron_1	0.294822	0.423081
0.00227987	-0.124828	0.152	0.178	1	DS_vs_CTL	SoloTE-Charlie7	0.00477851	FALSE	Interneuron_1	0.990411	1.33874
0.0981111	-0.125984	0.079	0.093	1	DS_vs_CTL	SoloTE-L2-3-Crp	0.132626	FALSE	Interneuron_1	0.367605	0.631421
0.00184201	-0.131948	0.614	0.669	1	DS_vs_CTL	SoloTE-L1MDa	0.0039478	FALSE	Interneuron_1	4.66717	5.46021
0.00266863	-0.137467	0.061	0.077	1	DS_vs_CTL	SoloTE-L1M3c	0.00542882	FALSE	Interneuron_1	0.377382	0.456593
1.06781e-05	-0.139839	0.327	0.384	0.0115537	DS_vs_CTL	SoloTE-L1PA14	4.56553e-05	FALSE	Interneuron_1	1.86671	3.1732
1.2846e-08	-0.143814	0.644	0.732	1.38994e-05	DS_vs_CTL	SoloTE-L1PB1	1.51263e-07	FALSE	Interneuron_1	6.4654	9.56617
0.000732476	-0.149458	0.089	0.11	0.792539	DS_vs_CTL	SoloTE-MER72B	0.001747	FALSE	Interneuron_1	0.123862	0.0738831
0.00010818	-0.150125	0.271	0.318	0.11705	DS_vs_CTL	SoloTE-L1MD3	0.000330107	FALSE	Interneuron_1	1.59025	2.24883
0.247638	-0.151773	0.053	0.063	1	DS_vs_CTL	SoloTE-Zaphod	0.297022	FALSE	Interneuron_1	0.285329	0.342767
0.00087529	-0.152405	0.093	0.117	0.947063	DS_vs_CTL	SoloTE-Tigger3c	0.0020407	FALSE	Interneuron_1	0.476607	0.657048
0.62104	-0.15275	0.054	0.059	1	DS_vs_CTL	SoloTE-LTR67B	0.65916	FALSE	Interneuron_1	0.266108	0.3397
5.65242e-07	-0.153512	0.499	0.579	0.000611592	DS_vs_CTL	SoloTE-L1PA13	3.50113e-06	FALSE	Interneuron_1	3.74156	5.91492
0.650258	-0.155008	0.045	0.051	1	DS_vs_CTL	SoloTE-MER113A	0.68566	FALSE	Interneuron_1	0.20873	0.306524
0.0026661	-0.155657	0.293	0.334	1	DS_vs_CTL	SoloTE-HERVH-int	0.00542882	FALSE	Interneuron_1	2.37606	2.47737
0.241531	-0.160095	0.046	0.055	1	DS_vs_CTL	SoloTE-MLT1F2-int	0.292231	FALSE	Interneuron_1	0.244959	0.195277
0.481636	-0.162931	0.084	0.094	1	DS_vs_CTL	SoloTE-MLT1O	0.52606	FALSE	Interneuron_1	0.425957	0.633927
0.00804098	-0.164851	0.05	0.061	1	DS_vs_CTL	SoloTE-MER63A	0.0149642	FALSE	Interneuron_1	0.242636	0.365156
0.0953648	-0.169504	0.084	0.099	1	DS_vs_CTL	SoloTE-AluYe6	0.129335	FALSE	Interneuron_1	0.383466	0.354482
0.0900695	-0.170825	0.143	0.166	1	DS_vs_CTL	SoloTE-L1PA12	0.124418	FALSE	Interneuron_1	1.02975	1.2646
5.71372e-10	-0.172674	0.316	0.39	6.18224e-07	DS_vs_CTL	SoloTE-MER33	1.39482e-08	FALSE	Interneuron_1	2.00457	2.65965
0.511034	-0.172721	0.055	0.059	1	DS_vs_CTL	SoloTE-Tigger16a	0.55229	FALSE	Interneuron_1	0.2142	0.362725
0.496903	-0.173444	0.056	0.065	1	DS_vs_CTL	SoloTE-MER117	0.538419	FALSE	Interneuron_1	0.369235	0.562102
7.97909e-07	-0.175902	0.475	0.553	0.000863337	DS_vs_CTL	SoloTE-L1MA8	4.66383e-06	FALSE	Interneuron_1	3.4235	5.23831
0.373272	-0.179666	0.098	0.112	1	DS_vs_CTL	SoloTE-L1M2a	0.426743	FALSE	Interneuron_1	0.477723	0.631257
0.0407797	-0.179732	0.042	0.052	1	DS_vs_CTL	SoloTE-ORSL	0.0633842	FALSE	Interneuron_1	0.209373	0.229743
0.151715	-0.18046	0.058	0.071	1	DS_vs_CTL	SoloTE-AluYh3a3	0.193728	FALSE	Interneuron_1	0.352604	0.384555
0.0461348	-0.183438	0.13	0.153	1	DS_vs_CTL	SoloTE-Tigger4b	0.0700624	FALSE	Interneuron_1	0.647477	0.975577
0.00561814	-0.185438	0.145	0.174	1	DS_vs_CTL	SoloTE-L4-C-Mam	0.0106951	FALSE	Interneuron_1	0.805203	1.09771
0.0330731	-0.186654	0.05	0.062	1	DS_vs_CTL	SoloTE-L1P4a	0.0525874	FALSE	Interneuron_1	0.331389	0.37551
9.25514e-15	-0.190147	0.707	0.813	1.00141e-11	DS_vs_CTL	SoloTE-L1PA5	1.92044e-12	FALSE	Interneuron_1	8.31705	13.6655
0.124766	-0.193021	0.053	0.065	1	DS_vs_CTL	SoloTE-LTR5-Hs	0.164942	FALSE	Interneuron_1	0.311101	0.313256
0.0613606	-0.193471	0.084	0.102	1	DS_vs_CTL	SoloTE-MER41-int	0.0892551	FALSE	Interneuron_1	0.499074	0.703045
0.000809415	-0.194949	0.13	0.161	0.875787	DS_vs_CTL	SoloTE-LTR7B	0.00191149	FALSE	Interneuron_1	0.816722	0.798842
3.60433e-09	-0.204438	0.503	0.6	3.89988e-06	DS_vs_CTL	SoloTE-L1PA10	5.53998e-08	FALSE	Interneuron_1	4.3745	6.41766
3.69219e-07	-0.206391	0.439	0.523	0.000399495	DS_vs_CTL	SoloTE-L1PA15	2.47139e-06	FALSE	Interneuron_1	3.18701	5.39745
6.57976e-05	-0.20721	0.247	0.299	0.071193	DS_vs_CTL	SoloTE-L1M4b	0.000211674	FALSE	Interneuron_1	1.71944	2.29262
0.00105816	-0.210212	0.101	0.129	1	DS_vs_CTL	SoloTE-Tigger9b	0.00243965	FALSE	Interneuron_1	0.363572	0.434086
5.38506e-10	-0.211999	0.772	0.843	5.82664e-07	DS_vs_CTL	SoloTE-L1PA4	1.39482e-08	FALSE	Interneuron_1	11.1711	16.2987
0.0741905	-0.212619	0.042	0.053	1	DS_vs_CTL	SoloTE-MER51A	0.104725	FALSE	Interneuron_1	0.252428	0.316456
0.21405	-0.215419	0.074	0.089	1	DS_vs_CTL	SoloTE-MER21A	0.264377	FALSE	Interneuron_1	0.389737	0.475646
0.00239934	-0.224067	0.163	0.199	1	DS_vs_CTL	SoloTE-L1ME3C	0.00497863	FALSE	Interneuron_1	0.846141	1.26554
0.458642	-0.226385	0.054	0.063	1	DS_vs_CTL	SoloTE-Charlie10	0.507564	FALSE	Interneuron_1	0.280648	0.347233
0.000264781	-0.230076	0.207	0.254	0.286493	DS_vs_CTL	SoloTE-L1P1	0.000718197	FALSE	Interneuron_1	1.56017	1.82015
0.00020153	-0.232982	0.052	0.072	0.218055	DS_vs_CTL	SoloTE-MER58D	0.000568945	FALSE	Interneuron_1	0.175188	0.197042
0.0134163	-0.233911	0.119	0.148	1	DS_vs_CTL	SoloTE-Charlie8	0.0231989	FALSE	Interneuron_1	0.724304	0.930808
3.9417e-05	-0.234676	0.209	0.262	0.0426492	DS_vs_CTL	SoloTE-L3b	0.000134082	FALSE	Interneuron_1	1.1513	1.77614
2.42995e-07	-0.235986	0.724	0.791	0.000262921	DS_vs_CTL	SoloTE-L1PA2	1.73867e-06	FALSE	Interneuron_1	9.5004	10.2916
0.00400267	-0.236794	0.18	0.218	1	DS_vs_CTL	SoloTE-L1P3	0.00776218	FALSE	Interneuron_1	1.18494	1.70187
2.16861e-05	-0.240312	0.579	0.651	0.0234644	DS_vs_CTL	SoloTE-L1M1	7.96438e-05	FALSE	Interneuron_1	4.49795	6.0116
9.2172e-09	-0.240493	0.484	0.58	9.97301e-06	DS_vs_CTL	SoloTE-L1MC3	1.18108e-07	FALSE	Interneuron_1	3.5819	5.6904
0.0304399	-0.25115	0.194	0.229	1	DS_vs_CTL	SoloTE-Plat-L3	0.0489634	TRUE	Interneuron_1	0.505001	0.65149
0.41693	-0.255101	0.044	0.054	1	DS_vs_CTL	SoloTE-MADE2	0.467637	FALSE	Interneuron_1	0.230002	0.286424
0.415971	-0.261331	0.047	0.056	1	DS_vs_CTL	SoloTE-MER57E3	0.467637	FALSE	Interneuron_1	0.228659	0.232758
0.0939849	-0.261814	0.047	0.061	1	DS_vs_CTL	SoloTE-HERVK9-int	0.128786	FALSE	Interneuron_1	0.390456	0.466287
0.243384	-0.268558	0.049	0.061	1	DS_vs_CTL	SoloTE-LTR41	0.293502	FALSE	Interneuron_1	0.254332	0.318356
1.1652e-12	-0.272698	0.85	0.891	1.26074e-09	DS_vs_CTL	SoloTE-L1PA3	1.61186e-10	TRUE	Interneuron_1	15.0102	18.5481
0.0441756	-0.282395	0.107	0.133	1	DS_vs_CTL	SoloTE-AluYd8	0.0676489	FALSE	Interneuron_1	0.614071	0.590844
0.00234377	-0.285656	0.135	0.171	1	DS_vs_CTL	SoloTE-Tigger4	0.00488775	TRUE	Interneuron_1	0.645329	0.849707
0.0254177	-0.292955	0.041	0.057	1	DS_vs_CTL	SoloTE-MER67C	0.0413661	TRUE	Interneuron_1	0.231153	0.272678
0.00311897	-0.298347	0.113	0.146	1	DS_vs_CTL	SoloTE-MER65-int	0.00631401	TRUE	Interneuron_1	0.541008	0.613814
0.0148354	-0.303271	0.075	0.099	1	DS_vs_CTL	SoloTE-LTR7	0.0251293	TRUE	Interneuron_1	0.465021	0.501958
0.217584	-0.304169	0.076	0.092	1	DS_vs_CTL	SoloTE-MER21-int	0.267944	FALSE	Interneuron_1	0.321212	0.444077
0.313756	-0.308772	0.073	0.086	1	DS_vs_CTL	SoloTE-Charlie29a	0.363711	FALSE	Interneuron_1	0.32753	0.439973
3.86084e-07	-0.311143	0.251	0.323	0.000417743	DS_vs_CTL	SoloTE-L1P4	2.54325e-06	TRUE	Interneuron_1	1.31775	1.7105
0.00333177	-0.312457	0.077	0.102	1	DS_vs_CTL	SoloTE-MER4A1	0.00661572	TRUE	Interneuron_1	0.406614	0.541162
0.19926	-0.314113	0.052	0.065	1	DS_vs_CTL	SoloTE-HSMAR1	0.248327	FALSE	Interneuron_1	0.244831	0.359604
0.277274	-0.325276	0.057	0.066	1	DS_vs_CTL	SoloTE-LTR25-int	0.328768	FALSE	Interneuron_1	0.296143	0.314374
0.108262	-0.328459	0.069	0.088	1	DS_vs_CTL	SoloTE-MER104	0.145401	FALSE	Interneuron_1	0.340805	0.447194
1.10013e-05	-0.342972	0.154	0.208	0.0119034	DS_vs_CTL	SoloTE-MER4-int	4.56553e-05	TRUE	Interneuron_1	1.12481	1.19844
0.040719	-0.352154	0.044	0.059	1	DS_vs_CTL	SoloTE-Charlie24	0.0633842	FALSE	Interneuron_1	0.256412	0.335144
0.131333	-0.407391	0.042	0.056	1	DS_vs_CTL	SoloTE-HERV4-I-int	0.171144	FALSE	Interneuron_1	0.311635	0.348292
0.04228	-0.410754	0.052	0.072	1	DS_vs_CTL	SoloTE-MER63C	0.0652275	FALSE	Interneuron_1	0.332897	0.372826
2.05339e-10	-0.413153	0.403	0.509	2.22177e-07	DS_vs_CTL	SoloTE-L1HS	8.52159e-09	TRUE	Interneuron_1	3.41699	3.23246
0.000949287	-0.414357	0.064	0.092	1	DS_vs_CTL	SoloTE-MER4E	0.00220086	TRUE	Interneuron_1	0.288492	0.294668
0.0164124	-0.41845	0.089	0.116	1	DS_vs_CTL	SoloTE-MamTip2	0.0275755	TRUE	Interneuron_1	0.422191	0.533931
1.10551e-07	-0.42584	0.23	0.311	0.000119616	DS_vs_CTL	SoloTE-L1PB2	8.82281e-07	TRUE	Interneuron_1	1.41635	1.8564
0.0197862	-0.444114	0.04	0.059	1	DS_vs_CTL	SoloTE-L1M2c	0.0327143	TRUE	Interneuron_1	0.281509	0.402756
0.0480641	-0.458767	0.044	0.062	1	DS_vs_CTL	SoloTE-MER65A	0.0720094	FALSE	Interneuron_1	0.255766	0.306735
5.3708e-06	-0.460301	0.106	0.157	0.00581121	DS_vs_CTL	SoloTE-MER74A	2.44932e-05	TRUE	Interneuron_1	0.464549	0.683625
0.0943393	-0.478185	0.041	0.054	1	DS_vs_CTL	SoloTE-MER49	0.128786	FALSE	Interneuron_1	0.192686	0.218901
0.0520678	-0.499233	0.034	0.05	1	DS_vs_CTL	SoloTE-LTR10C	0.077043	FALSE	Interneuron_1	0.196611	0.254102
0.0716928	-0.50252	0.048	0.065	1	DS_vs_CTL	SoloTE-Tigger10	0.102242	FALSE	Interneuron_1	0.205166	0.301228
0.0018382	-0.540028	0.045	0.071	1	DS_vs_CTL	SoloTE-MLT2A2	0.0039478	TRUE	Interneuron_1	0.257904	0.35158
4.82006e-06	-0.547413	0.18	0.243	0.00521531	DS_vs_CTL	SoloTE-L1PB	2.22258e-05	TRUE	Interneuron_1	0.865482	0.906986
0.000204937	-0.611683	0.065	0.102	0.221742	DS_vs_CTL	SoloTE-MER2B	0.000570798	TRUE	Interneuron_1	0.393456	0.503701
0.00117763	-0.651355	0.035	0.059	1	DS_vs_CTL	SoloTE-Chap1-Mam	0.00268526	TRUE	Interneuron_1	0.14911	0.205483
5.37837e-05	-0.738951	0.037	0.068	0.058194	DS_vs_CTL	SoloTE-MER106B	0.000174377	TRUE	Interneuron_1	0.211905	0.288158
6.89076e-08	-0.760349	0.086	0.145	7.45581e-05	DS_vs_CTL	SoloTE-MER8	6.0844e-07	TRUE	Interneuron_1	0.404946	0.532465
2.28578e-17	-0.798289	0.174	0.294	2.47321e-14	DS_vs_CTL	SoloTE-L1P2	9.48599e-15	TRUE	Interneuron_1	1.17955	1.35182
0.000252868	-0.871075	0.045	0.075	0.273603	DS_vs_CTL	SoloTE-MER11C	0.000694969	TRUE	Interneuron_1	0.298633	0.319514

## Sheet: Interneuron_2
p_val	avg_log2FC	pct.1	pct.2	p_val_adj	comparison	gene	FDR	sig	cellsubtype	CTL_expression	DS_expression
1.05095e-16	0.989852	0.096	0.044	1.13713e-13	DS_vs_CTL	SoloTE-Ricksha	1.02994e-14	TRUE	Interneuron_2	0.213622	0.333721
2.5241e-15	0.915175	0.091	0.044	2.73108e-12	DS_vs_CTL	SoloTE-LTR46-int	1.76687e-13	TRUE	Interneuron_2	0.245677	0.293236
1.12804e-09	0.845669	0.061	0.03	1.22054e-06	DS_vs_CTL	SoloTE-LTR48	2.00933e-08	TRUE	Interneuron_2	0.118523	0.172519
7.54096e-20	0.83396	0.218	0.128	8.15932e-17	DS_vs_CTL	SoloTE-LTR81B	1.23169e-17	TRUE	Interneuron_2	1.16942	1.21531
3.40025e-07	0.833048	0.074	0.042	0.000367907	DS_vs_CTL	SoloTE-LTR16	1.98348e-06	TRUE	Interneuron_2	0.113488	0.187228
1.55415e-06	0.76995	0.063	0.035	0.00168159	DS_vs_CTL	SoloTE-LTR85c	6.73924e-06	TRUE	Interneuron_2	0.137277	0.208693
5.38312e-07	0.722023	0.069	0.04	0.000582453	DS_vs_CTL	SoloTE-MLT2B2	2.74763e-06	TRUE	Interneuron_2	0.146069	0.250657
0.000212996	0.706383	0.059	0.037	0.230461	DS_vs_CTL	SoloTE-MamGypLTR1a	0.000429497	TRUE	Interneuron_2	0.0634975	0.0854025
3.93929e-07	0.611341	0.101	0.065	0.000426232	DS_vs_CTL	SoloTE-MamRep137	2.16882e-06	TRUE	Interneuron_2	0.253383	0.382827
2.92619e-07	0.61117	0.065	0.039	0.000316614	DS_vs_CTL	SoloTE-MamGypLTR1c	1.77016e-06	TRUE	Interneuron_2	0.0828548	0.111926
3.87566e-12	0.60393	0.201	0.133	4.19347e-09	DS_vs_CTL	SoloTE-L1M3e	1.58256e-10	TRUE	Interneuron_2	0.222306	0.287384
3.33365e-07	0.596736	0.091	0.057	0.000360701	DS_vs_CTL	SoloTE-Kanga11a	1.96806e-06	TRUE	Interneuron_2	0.150663	0.193887
3.45965e-06	0.590615	0.064	0.039	0.00374334	DS_vs_CTL	SoloTE-LTR103-Mam	1.33483e-05	TRUE	Interneuron_2	0.318036	0.445474
1.46223e-12	0.578099	0.099	0.057	1.58213e-09	DS_vs_CTL	SoloTE-HERVH48-int	7.16492e-11	TRUE	Interneuron_2	0.2415	0.33252
4.19616e-08	0.560044	0.05	0.029	4.54025e-05	DS_vs_CTL	SoloTE-Charlie30a	4.21061e-07	TRUE	Interneuron_2	0.0814214	0.125953
7.5909e-08	0.530316	0.134	0.091	8.21335e-05	DS_vs_CTL	SoloTE-LTR16C	6.52551e-07	TRUE	Interneuron_2	0.383912	0.628033
4.28672e-07	0.529086	0.079	0.05	0.000463823	DS_vs_CTL	SoloTE-MLT2B3	2.25859e-06	TRUE	Interneuron_2	0.194258	0.293121
0.000520808	0.51118	0.054	0.035	0.563514	DS_vs_CTL	SoloTE-LTR16B2	0.000934784	TRUE	Interneuron_2	0.108042	0.139605
5.23729e-09	0.509856	0.138	0.092	5.66675e-06	DS_vs_CTL	SoloTE-AmnSINE1	7.33221e-08	TRUE	Interneuron_2	0.192393	0.316409
8.67779e-08	0.507252	0.197	0.143	9.38937e-05	DS_vs_CTL	SoloTE-MLT1E1A	7.14018e-07	TRUE	Interneuron_2	0.680537	1.08659
4.82456e-09	0.503162	0.117	0.077	5.22017e-06	DS_vs_CTL	SoloTE-MER117	6.95304e-08	TRUE	Interneuron_2	0.369235	0.562102
3.69709e-10	0.501573	0.084	0.051	4.00025e-07	DS_vs_CTL	SoloTE-MER63B	7.87642e-09	TRUE	Interneuron_2	0.207266	0.335563
0.000921799	0.493555	0.055	0.037	0.997386	DS_vs_CTL	SoloTE-LTR38	0.00156291	TRUE	Interneuron_2	0.0378942	0.0362337
1.92968e-07	0.489203	0.073	0.046	0.000208791	DS_vs_CTL	SoloTE-L2-1-AMi	1.27776e-06	TRUE	Interneuron_2	0.13656	0.30575
3.08362e-11	0.48423	0.07	0.041	3.33648e-08	DS_vs_CTL	SoloTE-THE1C-int	8.88809e-10	TRUE	Interneuron_2	0.141505	0.319306
1.27165e-06	0.481843	0.082	0.054	0.00137593	DS_vs_CTL	SoloTE-Penelope1-Vert	5.66464e-06	TRUE	Interneuron_2	0.168973	0.223293
5.2071e-06	0.459428	0.056	0.036	0.00563409	DS_vs_CTL	SoloTE-LTR85b	1.86239e-05	TRUE	Interneuron_2	0.0772305	0.162211
4.69706e-09	0.457279	0.138	0.094	5.08222e-06	DS_vs_CTL	SoloTE-MER4A1	6.95304e-08	TRUE	Interneuron_2	0.406614	0.541162
1.77657e-13	0.443839	0.413	0.319	1.92225e-10	DS_vs_CTL	SoloTE-MamSINE1	9.67244e-12	TRUE	Interneuron_2	0.834092	1.13486
0.00116704	0.435283	0.066	0.047	1	DS_vs_CTL	SoloTE-MER44D	0.00193848	TRUE	Interneuron_2	0.146428	0.198954
8.75309e-06	0.427751	0.116	0.082	0.00947084	DS_vs_CTL	SoloTE-MER44B	2.87853e-05	TRUE	Interneuron_2	0.272322	0.480506
1.23328e-09	0.427639	0.365	0.321	1.33441e-06	DS_vs_CTL	SoloTE-L1PA8A	2.08381e-08	TRUE	Interneuron_2	1.31199	2.36171
1.10914e-07	0.411991	0.132	0.093	0.000120009	DS_vs_CTL	SoloTE-L1PA15-16	8.49188e-07	TRUE	Interneuron_2	0.403693	0.499175
8.39578e-06	0.409789	0.218	0.169	0.00908424	DS_vs_CTL	SoloTE-L1M4a2	2.79859e-05	TRUE	Interneuron_2	0.668815	1.24614
5.08407e-05	0.408076	0.08	0.057	0.0550096	DS_vs_CTL	SoloTE-MSTB-int	0.00012546	TRUE	Interneuron_2	0.182822	0.268606
4.14498e-09	0.39962	0.098	0.065	4.48487e-06	DS_vs_CTL	SoloTE-BLACKJACK	6.34701e-08	TRUE	Interneuron_2	0.319657	0.455314
0.000414268	0.394554	0.07	0.051	0.448238	DS_vs_CTL	SoloTE-MER57A1	0.000766005	TRUE	Interneuron_2	0.191186	0.249068
4.24867e-06	0.387046	0.081	0.056	0.00459706	DS_vs_CTL	SoloTE-MER49	1.57716e-05	TRUE	Interneuron_2	0.192686	0.218901
1.95998e-08	0.370946	0.362	0.331	2.1207e-05	DS_vs_CTL	SoloTE-L1MA1	2.23346e-07	TRUE	Interneuron_2	1.43	2.91038
5.72634e-11	0.369744	0.47	0.42	6.1959e-08	DS_vs_CTL	SoloTE-L1MA6	1.47679e-09	TRUE	Interneuron_2	1.75047	3.17345
4.74768e-06	0.364123	0.268	0.214	0.00513699	DS_vs_CTL	SoloTE-THE1B-int	1.72323e-05	TRUE	Interneuron_2	0.923728	1.46537
4.23975e-06	0.363488	0.321	0.271	0.00458741	DS_vs_CTL	SoloTE-L1MA5A	1.57716e-05	TRUE	Interneuron_2	1.23145	2.11585
6.54351e-16	0.361231	0.669	0.614	7.08008e-13	DS_vs_CTL	SoloTE-L1MD1	5.34387e-14	TRUE	Interneuron_2	3.35563	5.72151
8.2134e-09	0.36029	0.065	0.042	8.8869e-06	DS_vs_CTL	SoloTE-LOR1-int	1.0591e-07	TRUE	Interneuron_2	0.218008	0.356546
3.65494e-06	0.354421	0.075	0.052	0.00395464	DS_vs_CTL	SoloTE-MER11A	1.39916e-05	TRUE	Interneuron_2	0.226106	0.316756
1.10399e-05	0.348446	0.102	0.074	0.0119451	DS_vs_CTL	SoloTE-THE1A-int	3.44556e-05	TRUE	Interneuron_2	0.284282	0.478383
8.33959e-10	0.342412	0.321	0.248	9.02344e-07	DS_vs_CTL	SoloTE-HAL1b	1.57169e-08	TRUE	Interneuron_2	0.932221	1.37387
2.75602e-11	0.34163	0.566	0.51	2.98201e-08	DS_vs_CTL	SoloTE-L1MA7	8.4403e-10	TRUE	Interneuron_2	2.58821	4.09368
1.06541e-05	0.339968	0.059	0.04	0.0115278	DS_vs_CTL	SoloTE-Tigger20a	3.38995e-05	TRUE	Interneuron_2	0.161106	0.271865
0.000105429	0.339794	0.113	0.084	0.114074	DS_vs_CTL	SoloTE-LTR16A	0.000241116	TRUE	Interneuron_2	0.261314	0.389998
8.70224e-06	0.330322	0.153	0.116	0.00941583	DS_vs_CTL	SoloTE-LTR12C	2.87853e-05	TRUE	Interneuron_2	0.567307	0.643458
3.66887e-10	0.329772	0.106	0.071	3.96971e-07	DS_vs_CTL	SoloTE-HERVK9-int	7.87642e-09	TRUE	Interneuron_2	0.390456	0.466287
1.00763e-10	0.328493	0.531	0.488	1.09026e-07	DS_vs_CTL	SoloTE-MER20	2.4687e-09	TRUE	Interneuron_2	2.66442	3.96409
1.4521e-07	0.327623	0.051	0.034	0.000157117	DS_vs_CTL	SoloTE-HERVS71-int	1.01683e-06	TRUE	Interneuron_2	0.234036	0.285798
0.00157462	0.32732	0.089	0.068	1	DS_vs_CTL	SoloTE-MER4B	0.00251323	TRUE	Interneuron_2	0.251236	0.338267
8.52983e-07	0.327183	0.058	0.04	0.000922927	DS_vs_CTL	SoloTE-Tigger16b	4.05788e-06	TRUE	Interneuron_2	0.172434	0.342406
7.31996e-07	0.325876	0.173	0.131	0.00079202	DS_vs_CTL	SoloTE-L4-B-Mam	3.62301e-06	TRUE	Interneuron_2	0.507091	0.708445
3.19561e-06	0.320681	0.124	0.092	0.00345765	DS_vs_CTL	SoloTE-Charlie18a	1.24274e-05	TRUE	Interneuron_2	0.390705	0.608364
6.86396e-08	0.317796	0.064	0.043	7.4268e-05	DS_vs_CTL	SoloTE-MER6A	6.00596e-07	TRUE	Interneuron_2	0.175851	0.304564
0.000767355	0.314697	0.051	0.037	0.830278	DS_vs_CTL	SoloTE-MLT1H2-int	0.00133809	TRUE	Interneuron_2	0.124727	0.158796
1.35538e-07	0.314625	0.212	0.164	0.000146653	DS_vs_CTL	SoloTE-MLT1H2	9.76674e-07	TRUE	Interneuron_2	0.618722	0.848114
3.10981e-12	0.308831	0.763	0.774	3.36481e-09	DS_vs_CTL	SoloTE-L1MC1	1.38528e-10	TRUE	Interneuron_2	6.15815	10.972
0.000327453	0.306325	0.074	0.055	0.354305	DS_vs_CTL	SoloTE-HERV17-int	0.000626766	TRUE	Interneuron_2	0.243114	0.375493
7.33846e-05	0.304992	0.061	0.044	0.0794021	DS_vs_CTL	SoloTE-MER91A	0.000172877	TRUE	Interneuron_2	0.192412	0.320452
2.55219e-07	0.30479	0.139	0.103	0.000276147	DS_vs_CTL	SoloTE-ERV3-16A3-I-int	1.56322e-06	TRUE	Interneuron_2	0.472856	0.693246
2.44944e-06	0.302056	0.258	0.206	0.00265029	DS_vs_CTL	SoloTE-L1M6	1.00859e-05	TRUE	Interneuron_2	1.07546	1.69337
3.7319e-07	0.294937	0.095	0.069	0.000403791	DS_vs_CTL	SoloTE-LTR79	2.09787e-06	TRUE	Interneuron_2	0.280158	0.390995
2.70882e-06	0.290131	0.075	0.053	0.00293095	DS_vs_CTL	SoloTE-L1M2c	1.08797e-05	TRUE	Interneuron_2	0.281509	0.402756
0.00226881	0.287487	0.074	0.056	1	DS_vs_CTL	SoloTE-MER90a	0.00339115	TRUE	Interneuron_2	0.220353	0.279976
0.000151129	0.286519	0.067	0.05	0.163522	DS_vs_CTL	SoloTE-MLT1E3	0.000319195	TRUE	Interneuron_2	0.182224	0.28131
8.74308e-08	0.285431	0.127	0.094	9.46001e-05	DS_vs_CTL	SoloTE-HERVL-int	7.14018e-07	TRUE	Interneuron_2	0.355042	0.560046
0.00102426	0.284605	0.274	0.233	1	DS_vs_CTL	SoloTE-Tigger3a	0.0017188	TRUE	Interneuron_2	0.850236	1.36352
0.000179878	0.27562	0.073	0.054	0.194628	DS_vs_CTL	SoloTE-L1M3f	0.000370338	TRUE	Interneuron_2	0.211827	0.346428
0.0020053	0.274403	0.078	0.061	1	DS_vs_CTL	SoloTE-Charlie16a	0.00309967	TRUE	Interneuron_2	0.222019	0.309655
0.000288658	0.270143	0.28	0.235	0.312328	DS_vs_CTL	SoloTE-MSTD	0.000559061	TRUE	Interneuron_2	1.0024	1.59056
6.49746e-07	0.268455	0.064	0.046	0.000703025	DS_vs_CTL	SoloTE-MSTD-int	3.24873e-06	TRUE	Interneuron_2	0.153046	0.218853
0.0104145	0.267529	0.081	0.065	1	DS_vs_CTL	SoloTE-LTR82A	0.0136082	TRUE	Interneuron_2	0.201509	0.253021
6.01465e-08	0.267364	0.105	0.076	6.50785e-05	DS_vs_CTL	SoloTE-LTR78	5.56071e-07	TRUE	Interneuron_2	0.302114	0.49403
1.33415e-06	0.265923	0.109	0.082	0.00144355	DS_vs_CTL	SoloTE-MER4E1	5.83692e-06	TRUE	Interneuron_2	0.360474	0.472261
0.0022864	0.261683	0.914	0.913	1	DS_vs_CTL	SoloTE-L1PA7	0.0034007	TRUE	Interneuron_2	10.1212	17.6726
0.00192965	0.261144	0.063	0.048	1	DS_vs_CTL	SoloTE-Tigger12	0.00302085	TRUE	Interneuron_2	0.153177	0.209788
5.38001e-08	0.258918	0.251	0.199	5.82117e-05	DS_vs_CTL	SoloTE-L1M8	5.06962e-07	TRUE	Interneuron_2	0.790072	1.18881
0.0001388	0.258691	0.109	0.084	0.150181	DS_vs_CTL	SoloTE-MER77B	0.000298297	TRUE	Interneuron_2	0.381145	0.476847
5.01633e-14	0.256578	0.78	0.741	5.42767e-11	DS_vs_CTL	SoloTE-L1MEg	3.0725e-12	TRUE	Interneuron_2	5.84549	8.39954
0.000131479	0.253581	0.356	0.305	0.14226	DS_vs_CTL	SoloTE-MLT1L	0.000286265	TRUE	Interneuron_2	1.38147	1.86136
0.000131571	0.248326	0.424	0.398	0.14236	DS_vs_CTL	SoloTE-L1MB1	0.000286265	FALSE	Interneuron_2	1.99731	3.43557
2.88613e-06	0.244156	0.14	0.109	0.00312279	DS_vs_CTL	SoloTE-MER46C	1.14508e-05	FALSE	Interneuron_2	0.380881	0.596985
0.000491056	0.243853	0.416	0.395	0.531322	DS_vs_CTL	SoloTE-L1MA5	0.000891175	FALSE	Interneuron_2	1.71533	3.0412
0.0296297	0.241584	0.06	0.049	1	DS_vs_CTL	SoloTE-LTR49	0.03576	FALSE	Interneuron_2	0.21008	0.263053
0.000378529	0.239735	0.528	0.515	0.409568	DS_vs_CTL	SoloTE-L1MA4A	0.000705243	FALSE	Interneuron_2	2.6354	4.78142
1.09429e-05	0.238553	0.525	0.487	0.0118403	DS_vs_CTL	SoloTE-MLT1C	3.4372e-05	FALSE	Interneuron_2	2.75013	3.86929
0.00035163	0.233407	0.094	0.074	0.380464	DS_vs_CTL	SoloTE-MER5C	0.000667825	FALSE	Interneuron_2	0.392486	0.505322
2.673e-08	0.233347	0.669	0.649	2.89218e-05	DS_vs_CTL	SoloTE-L1ME2	2.97675e-07	FALSE	Interneuron_2	4.39628	7.13742
0.00123913	0.231472	0.324	0.281	1	DS_vs_CTL	SoloTE-L1PB3	0.00203749	FALSE	Interneuron_2	1.31327	2.1872
4.50103e-06	0.231051	0.619	0.577	0.00487011	DS_vs_CTL	SoloTE-THE1B	1.65827e-05	FALSE	Interneuron_2	3.99338	5.15998
4.56841e-06	0.230994	0.056	0.04	0.00494302	DS_vs_CTL	SoloTE-MER66-int	1.67054e-05	FALSE	Interneuron_2	0.164787	0.222563
0.000132032	0.229842	0.089	0.07	0.142859	DS_vs_CTL	SoloTE-Arthur1	0.000286265	FALSE	Interneuron_2	0.283925	0.370184
0.000257185	0.228937	0.07	0.054	0.278274	DS_vs_CTL	SoloTE-Charlie22a	0.000508147	FALSE	Interneuron_2	0.163366	0.225876
0.000118332	0.228519	0.11	0.087	0.128035	DS_vs_CTL	SoloTE-Charlie19a	0.000265976	FALSE	Interneuron_2	0.324952	0.435723
0.00181695	0.228481	0.357	0.313	1	DS_vs_CTL	SoloTE-L1ME3E	0.00285355	FALSE	Interneuron_2	1.26895	1.95196
0.00040691	0.228038	0.054	0.041	0.440276	DS_vs_CTL	SoloTE-MSTB2	0.000755249	FALSE	Interneuron_2	0.174476	0.255032
0.00121384	0.220702	0.283	0.243	1	DS_vs_CTL	SoloTE-L1MA10	0.00200264	FALSE	Interneuron_2	0.981322	1.69512
0.00300586	0.219416	0.093	0.076	1	DS_vs_CTL	SoloTE-LTR9B	0.00430665	FALSE	Interneuron_2	0.22856	0.282069
0.010344	0.219164	0.088	0.072	1	DS_vs_CTL	SoloTE-MLT2A1	0.0135523	FALSE	Interneuron_2	0.295192	0.398634
0.000775813	0.218577	0.193	0.16	0.83943	DS_vs_CTL	SoloTE-L1MCc	0.00134328	FALSE	Interneuron_2	0.705349	1.12822
0.0271694	0.217048	0.067	0.055	1	DS_vs_CTL	SoloTE-MER121	0.0329529	FALSE	Interneuron_2	0.139839	0.19128
3.23932e-07	0.215265	0.252	0.203	0.000350494	DS_vs_CTL	SoloTE-L1PBa	1.93569e-06	FALSE	Interneuron_2	0.989582	1.28141
1.9504e-11	0.212733	0.165	0.124	2.11033e-08	DS_vs_CTL	SoloTE-THE1D-int	6.3713e-10	FALSE	Interneuron_2	0.50169	0.694974
4.42706e-05	0.212459	0.867	0.854	0.0479008	DS_vs_CTL	SoloTE-L1MEc	0.000112819	FALSE	Interneuron_2	8.32909	12.9172
4.44367e-05	0.211722	0.066	0.05	0.0480805	DS_vs_CTL	SoloTE-MER51A	0.000112819	FALSE	Interneuron_2	0.252428	0.316456
3.68283e-07	0.210169	0.22	0.178	0.000398482	DS_vs_CTL	SoloTE-L1M7	2.09787e-06	FALSE	Interneuron_2	0.8512	1.28121
0.000896408	0.210062	0.069	0.053	0.969914	DS_vs_CTL	SoloTE-LTR5A	0.00152514	FALSE	Interneuron_2	0.288207	0.295561
0.00126086	0.207943	0.39	0.345	1	DS_vs_CTL	SoloTE-L1MEi	0.00205941	FALSE	Interneuron_2	1.44709	2.10421
2.54273e-06	0.20755	0.24	0.197	0.00275123	DS_vs_CTL	SoloTE-HAL1M8	1.03828e-05	FALSE	Interneuron_2	0.901785	1.42368
6.47565e-05	0.207238	0.088	0.07	0.0700665	DS_vs_CTL	SoloTE-Looper	0.000155108	FALSE	Interneuron_2	0.293457	0.369413
6.48281e-07	0.20624	0.156	0.124	0.00070144	DS_vs_CTL	SoloTE-L1MEj	3.24873e-06	FALSE	Interneuron_2	0.511899	0.855615
0.227365	0.205617	0.063	0.054	1	DS_vs_CTL	SoloTE-MER50-int	0.240105	FALSE	Interneuron_2	0.152337	0.190865
5.80541e-05	0.205288	0.056	0.042	0.0628145	DS_vs_CTL	SoloTE-LTR6A	0.000140824	FALSE	Interneuron_2	0.17602	0.185612
0.00214242	0.20432	0.06	0.047	1	DS_vs_CTL	SoloTE-LTR102-Mam	0.00329087	FALSE	Interneuron_2	0.118287	0.174333
4.38371e-07	0.204235	0.064	0.047	0.000474317	DS_vs_CTL	SoloTE-MER115	2.28512e-06	FALSE	Interneuron_2	0.178161	0.285257
3.97033e-06	0.203652	0.102	0.079	0.0042959	DS_vs_CTL	SoloTE-LTR40a	1.49651e-05	FALSE	Interneuron_2	0.244894	0.350155
7.38971e-10	0.20149	0.071	0.05	7.99567e-07	DS_vs_CTL	SoloTE-MER106A	1.44838e-08	FALSE	Interneuron_2	0.208964	0.324309
0.00555832	0.201255	0.353	0.314	1	DS_vs_CTL	SoloTE-THE1C	0.00760775	FALSE	Interneuron_2	1.17959	1.8031
4.93991e-05	0.199698	0.13	0.105	0.0534498	DS_vs_CTL	SoloTE-MLT2D	0.000123498	FALSE	Interneuron_2	0.417431	0.53641
2.73307e-05	0.199489	0.669	0.655	0.0295718	DS_vs_CTL	SoloTE-L1ME3G	7.60912e-05	FALSE	Interneuron_2	4.11562	6.00776
5.05064e-05	0.197333	0.758	0.723	0.0546479	DS_vs_CTL	SoloTE-L1MD2	0.00012546	FALSE	Interneuron_2	4.83091	7.06959
5.09522e-05	0.19651	0.145	0.118	0.0551302	DS_vs_CTL	SoloTE-MamRep605	0.00012546	FALSE	Interneuron_2	0.449045	0.703375
0.00259129	0.195106	0.546	0.522	1	DS_vs_CTL	SoloTE-L1ME3	0.00376775	FALSE	Interneuron_2	2.89402	4.39091
6.27342e-06	0.194549	0.067	0.051	0.00678784	DS_vs_CTL	SoloTE-Charlie7a	2.1957e-05	FALSE	Interneuron_2	0.172388	0.254745
0.000177457	0.193343	0.216	0.181	0.192008	DS_vs_CTL	SoloTE-L1ME5	0.000366894	FALSE	Interneuron_2	0.731216	1.28463
0.00198748	0.192743	0.596	0.595	1	DS_vs_CTL	SoloTE-L1MA2	0.00309164	FALSE	Interneuron_2	3.56858	6.48243
0.0363894	0.192629	0.151	0.131	1	DS_vs_CTL	SoloTE-L2-3-Crp	0.04319	FALSE	Interneuron_2	0.367605	0.631421
0.00131661	0.19253	0.291	0.251	1	DS_vs_CTL	SoloTE-MER21C	0.00214332	FALSE	Interneuron_2	1.15627	1.6344
0.0146796	0.191647	0.997	0.997	1	DS_vs_CTL	SoloTE-L2a	0.0188298	FALSE	Interneuron_2	33.4097	52.634
0.000275462	0.190882	0.063	0.05	0.298049	DS_vs_CTL	SoloTE-MER31A	0.00053562	FALSE	Interneuron_2	0.186918	0.251644
1.14819e-09	0.189691	0.138	0.105	1.24234e-06	DS_vs_CTL	SoloTE-L1MCb	2.00933e-08	FALSE	Interneuron_2	0.425126	0.558034
0.00198402	0.188652	0.055	0.044	1	DS_vs_CTL	SoloTE-LTR56	0.00309164	FALSE	Interneuron_2	0.161931	0.198343
0.000876127	0.18806	0.596	0.592	0.947969	DS_vs_CTL	SoloTE-L1MC4a	0.00150553	FALSE	Interneuron_2	3.45157	5.71215
0.0104998	0.187944	0.218	0.19	1	DS_vs_CTL	SoloTE-MER81	0.0136832	FALSE	Interneuron_2	0.677318	0.739243
2.1641e-05	0.187941	0.278	0.235	0.0234156	DS_vs_CTL	SoloTE-Tigger13a	6.12954e-05	FALSE	Interneuron_2	0.923066	1.21468
0.00342563	0.18793	0.848	0.859	1	DS_vs_CTL	SoloTE-HAL1	0.00485132	FALSE	Interneuron_2	8.03312	12.9386
0.0128635	0.187212	0.401	0.374	1	DS_vs_CTL	SoloTE-MLT1J	0.016631	FALSE	Interneuron_2	1.78782	2.48318
8.93528e-09	0.186398	0.206	0.165	9.66797e-06	DS_vs_CTL	SoloTE-MLT1E2	1.11316e-07	FALSE	Interneuron_2	0.683648	0.987433
0.000355411	0.18536	0.808	0.793	0.384555	DS_vs_CTL	SoloTE-L1MEd	0.000669814	FALSE	Interneuron_2	6.59295	9.71909
0.0693742	0.185299	0.06	0.05	1	DS_vs_CTL	SoloTE-LTR12F	0.0783257	FALSE	Interneuron_2	0.182114	0.226478
6.94949e-06	0.184335	0.09	0.071	0.00751935	DS_vs_CTL	SoloTE-MER63A	2.36476e-05	FALSE	Interneuron_2	0.242636	0.365156
0.00102051	0.183777	0.716	0.691	1	DS_vs_CTL	SoloTE-L1ME3A	0.00171838	FALSE	Interneuron_2	4.42598	6.7247
3.7813e-05	0.183062	0.622	0.64	0.0409137	DS_vs_CTL	SoloTE-L1MA4	0.000100698	FALSE	Interneuron_2	4.20235	7.51484
9.05812e-06	0.180893	0.2	0.164	0.00980088	DS_vs_CTL	SoloTE-LTR33	2.95898e-05	FALSE	Interneuron_2	0.646744	0.952004
7.9439e-07	0.180847	0.199	0.163	0.00085953	DS_vs_CTL	SoloTE-Tigger4b	3.85397e-06	FALSE	Interneuron_2	0.647477	0.975577
1.54065e-05	0.177946	0.096	0.074	0.0166698	DS_vs_CTL	SoloTE-LTR13	4.65999e-05	FALSE	Interneuron_2	0.355393	0.360475
9.61304e-07	0.17648	0.2	0.162	0.00104013	DS_vs_CTL	SoloTE-L1MEh	4.52922e-06	FALSE	Interneuron_2	0.710334	0.987472
0.0402449	0.175877	0.382	0.36	1	DS_vs_CTL	SoloTE-L1ME3F	0.0474039	FALSE	Interneuron_2	1.67943	2.91552
0.00224575	0.175031	0.155	0.132	1	DS_vs_CTL	SoloTE-MLT1M	0.00338591	FALSE	Interneuron_2	0.423209	0.714126
0.000273238	0.172354	0.165	0.137	0.295643	DS_vs_CTL	SoloTE-THE1A	0.000533413	FALSE	Interneuron_2	0.555047	0.84153
0.000372533	0.171761	0.142	0.119	0.403081	DS_vs_CTL	SoloTE-MLT1O	0.000699391	FALSE	Interneuron_2	0.425957	0.633927
4.14909e-07	0.16959	0.178	0.146	0.000448931	DS_vs_CTL	SoloTE-MLT2B4	2.21933e-06	FALSE	Interneuron_2	0.640626	0.834738
2.04028e-06	0.169282	0.108	0.085	0.00220758	DS_vs_CTL	SoloTE-MLT1G1	8.54477e-06	FALSE	Interneuron_2	0.402869	0.557423
0.0910422	0.169247	0.954	0.956	1	DS_vs_CTL	SoloTE-L2b	0.101158	FALSE	Interneuron_2	13.1462	20.7618
0.00329832	0.167294	0.128	0.109	1	DS_vs_CTL	SoloTE-Tigger19a	0.00468457	FALSE	Interneuron_2	0.446773	0.699575
9.087e-09	0.167131	0.076	0.058	9.83214e-06	DS_vs_CTL	SoloTE-MER113A	1.11316e-07	FALSE	Interneuron_2	0.20873	0.306524
0.0149221	0.166363	0.5	0.467	1	DS_vs_CTL	SoloTE-MER58A	0.0190909	FALSE	Interneuron_2	2.43874	3.295
0.0640121	0.16587	0.932	0.937	1	DS_vs_CTL	SoloTE-L1ME1	0.073114	FALSE	Interneuron_2	11.7908	18.7876
0.00223146	0.165699	0.059	0.048	1	DS_vs_CTL	SoloTE-LTR33A-	0.00337474	FALSE	Interneuron_2	0.184341	0.234935
0.00218745	0.164124	0.649	0.639	1	DS_vs_CTL	SoloTE-L1MB5	0.00331842	FALSE	Interneuron_2	4.05285	6.14001
0.000770884	0.16407	0.835	0.845	0.834097	DS_vs_CTL	SoloTE-L3	0.00133948	FALSE	Interneuron_2	6.94463	10.7018
7.97966e-05	0.162069	0.096	0.077	0.08634	DS_vs_CTL	SoloTE-MLT1A0-int	0.00018531	FALSE	Interneuron_2	0.265513	0.417509
0.00298756	0.161912	0.603	0.567	1	DS_vs_CTL	SoloTE-Tigger3b	0.00429298	FALSE	Interneuron_2	3.18241	3.91064
9.40904e-06	0.160527	0.135	0.11	0.0101806	DS_vs_CTL	SoloTE-MER102a	3.05326e-05	FALSE	Interneuron_2	0.512208	0.67635
0.0577481	0.155692	0.193	0.171	1	DS_vs_CTL	SoloTE-Tigger7	0.0665802	FALSE	Interneuron_2	0.596324	0.803797
0.0206697	0.152885	0.232	0.206	1	DS_vs_CTL	SoloTE-MER102b	0.0259032	FALSE	Interneuron_2	0.760023	1.03105
0.00433561	0.152731	0.681	0.69	1	DS_vs_CTL	SoloTE-L1PA8	0.00606985	FALSE	Interneuron_2	4.53595	7.5676
0.0660591	0.152666	0.36	0.332	1	DS_vs_CTL	SoloTE-MLT1K	0.0752767	FALSE	Interneuron_2	1.64315	2.38836
0.0252312	0.151945	0.671	0.663	1	DS_vs_CTL	SoloTE-L1MA9	0.0309082	FALSE	Interneuron_2	4.53445	7.48945
0.0021789	0.150124	0.351	0.313	1	DS_vs_CTL	SoloTE-Tigger2	0.00331571	FALSE	Interneuron_2	1.41416	1.95067
0.0326917	0.149496	0.538	0.527	1	DS_vs_CTL	SoloTE-L1PB4	0.0391661	FALSE	Interneuron_2	2.55988	3.90718
0.000162766	0.14801	0.121	0.102	0.176113	DS_vs_CTL	SoloTE-MLT1J1	0.000340835	FALSE	Interneuron_2	0.332393	0.518483
0.002462	0.147829	0.115	0.099	1	DS_vs_CTL	SoloTE-MSTC	0.00361192	FALSE	Interneuron_2	0.417901	0.673413
0.0693372	0.14742	0.423	0.402	1	DS_vs_CTL	SoloTE-MER5A1	0.0783257	FALSE	Interneuron_2	1.73886	2.56971
2.76402e-05	0.146798	0.057	0.045	0.0299067	DS_vs_CTL	SoloTE-LFSINE-Vert	7.65181e-05	FALSE	Interneuron_2	0.184061	0.311056
0.00287371	0.146305	0.059	0.048	1	DS_vs_CTL	SoloTE-LTR10A	0.00415374	FALSE	Interneuron_2	0.20292	0.2251
9.78878e-07	0.145719	0.104	0.084	0.00105915	DS_vs_CTL	SoloTE-Charlie24	4.5681e-06	FALSE	Interneuron_2	0.256412	0.335144
0.00829854	0.144834	0.081	0.069	1	DS_vs_CTL	SoloTE-MLT2B1	0.0110497	FALSE	Interneuron_2	0.28647	0.42547
0.00949509	0.144805	0.248	0.221	1	DS_vs_CTL	SoloTE-Charlie2b	0.012507	FALSE	Interneuron_2	0.963731	1.1796
0.0317048	0.143607	0.631	0.635	1	DS_vs_CTL	SoloTE-L1MB2	0.0381703	FALSE	Interneuron_2	3.88423	6.40301
0.00245535	0.141756	0.711	0.735	1	DS_vs_CTL	SoloTE-L1PA6	0.00361192	FALSE	Interneuron_2	5.3977	9.12062
0.000878738	0.141554	0.051	0.04	0.950795	DS_vs_CTL	SoloTE-HERVL40-int	0.00150553	FALSE	Interneuron_2	0.153594	0.227823
0.193445	0.137642	0.742	0.754	1	DS_vs_CTL	SoloTE-L1PA16	0.206061	FALSE	Interneuron_2	5.68962	10.1279
0.0268471	0.136919	0.558	0.528	1	DS_vs_CTL	SoloTE-MSTA	0.0326429	FALSE	Interneuron_2	2.80255	3.88109
0.02123	0.136702	0.483	0.458	1	DS_vs_CTL	SoloTE-MLT1A0	0.0264028	FALSE	Interneuron_2	2.26934	3.13748
0.000753689	0.13455	0.092	0.076	0.815491	DS_vs_CTL	SoloTE-MER45B	0.00132293	FALSE	Interneuron_2	0.267755	0.346336
0.0945524	0.132838	0.429	0.404	1	DS_vs_CTL	SoloTE-L1ME4c	0.104584	FALSE	Interneuron_2	1.92515	2.83934
0.000122748	0.131992	0.186	0.16	0.132813	DS_vs_CTL	SoloTE-Charlie1	0.000274641	FALSE	Interneuron_2	0.577154	0.759386
0.672076	0.131763	0.918	0.914	1	DS_vs_CTL	SoloTE-L1MB7	0.679005	FALSE	Interneuron_2	10.5498	16.4218
0.00455936	0.131417	0.227	0.201	1	DS_vs_CTL	SoloTE-L4-C-Mam	0.00636492	FALSE	Interneuron_2	0.805203	1.09771
0.0137136	0.13125	0.24	0.215	1	DS_vs_CTL	SoloTE-Charlie5	0.0176369	FALSE	Interneuron_2	0.767718	0.883771
0.000312089	0.130622	0.668	0.683	0.33768	DS_vs_CTL	SoloTE-L1MB4	0.000600516	FALSE	Interneuron_2	4.26255	6.64909
0.00227	0.128562	0.063	0.053	1	DS_vs_CTL	SoloTE-Charlie20a	0.00339115	FALSE	Interneuron_2	0.175253	0.254395
0.129851	0.128477	0.941	0.943	1	DS_vs_CTL	SoloTE-L2	0.142343	FALSE	Interneuron_2	12.2359	20.428
0.00463451	0.128082	0.816	0.834	1	DS_vs_CTL	SoloTE-L1MB8	0.00643318	FALSE	Interneuron_2	7.0022	10.2539
1.20708e-06	0.127837	0.123	0.101	0.00130606	DS_vs_CTL	SoloTE-OldhAT1	5.47657e-06	FALSE	Interneuron_2	0.357101	0.516156
0.342865	0.125902	0.993	0.993	1	DS_vs_CTL	SoloTE-MIRb	0.354439	FALSE	Interneuron_2	24.669	35.1648
0.00687696	0.124794	0.245	0.216	1	DS_vs_CTL	SoloTE-MLT1I	0.00923209	FALSE	Interneuron_2	1.05931	1.53366
0.0505385	0.124626	0.616	0.601	1	DS_vs_CTL	SoloTE-L1M2	0.0586821	FALSE	Interneuron_2	3.92321	5.39488
2.91704e-08	0.124537	0.079	0.061	3.15624e-05	DS_vs_CTL	SoloTE-LTR41	3.10728e-07	FALSE	Interneuron_2	0.254332	0.318356
2.02394e-05	0.124144	0.215	0.183	0.021899	DS_vs_CTL	SoloTE-AluYb9	5.93851e-05	FALSE	Interneuron_2	0.96892	0.981621
7.13727e-06	0.12366	0.054	0.041	0.00772253	DS_vs_CTL	SoloTE-MER6	2.41191e-05	FALSE	Interneuron_2	0.161998	0.260757
3.69393e-09	0.12297	0.075	0.057	3.99684e-06	DS_vs_CTL	SoloTE-Tigger6a	5.8388e-08	FALSE	Interneuron_2	0.214037	0.324209
0.00876504	0.1218	0.689	0.668	1	DS_vs_CTL	SoloTE-MLT1D	0.0116078	FALSE	Interneuron_2	3.46541	4.5309
0.0855048	0.121513	0.692	0.71	1	DS_vs_CTL	SoloTE-L1MA3	0.0954381	FALSE	Interneuron_2	4.77854	8.09659
0.00796996	0.120681	0.072	0.062	1	DS_vs_CTL	SoloTE-Charlie21a	0.0106456	FALSE	Interneuron_2	0.218371	0.280452
0.000376891	0.120257	0.527	0.555	0.407796	DS_vs_CTL	SoloTE-L1PA11	0.000704873	FALSE	Interneuron_2	3.03043	5.26764
0.165351	0.119513	0.627	0.609	1	DS_vs_CTL	SoloTE-L1PREC2	0.178856	FALSE	Interneuron_2	3.67077	5.50929
0.168534	0.118498	0.222	0.204	1	DS_vs_CTL	SoloTE-Tigger15a	0.181898	FALSE	Interneuron_2	0.713755	1.13713
0.351101	0.118492	0.069	0.062	1	DS_vs_CTL	SoloTE-ORSL	0.362188	FALSE	Interneuron_2	0.209373	0.229743
0.21522	0.117898	0.054	0.048	1	DS_vs_CTL	SoloTE-LTR8B	0.228264	FALSE	Interneuron_2	0.173413	0.25238
2.31151e-07	0.117549	0.188	0.156	0.000250105	DS_vs_CTL	SoloTE-MER21B	1.45949e-06	FALSE	Interneuron_2	0.621872	0.961212
0.0210397	0.115937	0.631	0.596	1	DS_vs_CTL	SoloTE-AluYh3	0.0262996	FALSE	Interneuron_2	3.28127	3.63502
7.5621e-07	0.115367	0.258	0.22	0.00081822	DS_vs_CTL	SoloTE-MLT1F2	3.70543e-06	FALSE	Interneuron_2	0.975904	1.2535
0.0988137	0.114118	0.577	0.575	1	DS_vs_CTL	SoloTE-L1ME3Cz	0.109051	FALSE	Interneuron_2	3.07265	4.5478
1.40624e-08	0.113091	0.133	0.107	1.52155e-05	DS_vs_CTL	SoloTE-ERVL-B4-int	1.64062e-07	FALSE	Interneuron_2	0.47454	0.64158
0.0691329	0.112765	0.968	0.966	1	DS_vs_CTL	SoloTE-L1M5	0.0783257	FALSE	Interneuron_2	14.9359	20.0054
0.0735123	0.111356	0.234	0.214	1	DS_vs_CTL	SoloTE-MER103C	0.082807	FALSE	Interneuron_2	0.857053	1.31118
0.112379	0.109552	0.685	0.688	1	DS_vs_CTL	SoloTE-L1MEf	0.123466	FALSE	Interneuron_2	4.73008	6.94582
1.7435e-05	0.107855	0.068	0.055	0.0188647	DS_vs_CTL	SoloTE-LTR10C	5.17767e-05	FALSE	Interneuron_2	0.196611	0.254102
0.176371	0.107702	0.446	0.422	1	DS_vs_CTL	SoloTE-L1M4c	0.189522	FALSE	Interneuron_2	2.1272	2.88871
0.00527185	0.107691	0.097	0.083	1	DS_vs_CTL	SoloTE-MLT1G	0.0072562	FALSE	Interneuron_2	0.323835	0.474366
0.00012377	0.107421	0.397	0.356	0.133919	DS_vs_CTL	SoloTE-L1M4b	0.000275158	FALSE	Interneuron_2	1.71944	2.29262
2.7866e-08	0.107293	0.136	0.109	3.0151e-05	DS_vs_CTL	SoloTE-MER1A	3.03429e-07	FALSE	Interneuron_2	0.533974	0.708073
0.000238807	0.105985	0.093	0.078	0.258389	DS_vs_CTL	SoloTE-HERV35I-int	0.000473747	FALSE	Interneuron_2	0.321968	0.355005
9.29252e-05	0.105752	0.055	0.045	0.100545	DS_vs_CTL	SoloTE-MER131	0.000213771	FALSE	Interneuron_2	0.159704	0.228206
0.164819	0.1057	0.575	0.561	1	DS_vs_CTL	SoloTE-L1ME3B	0.178675	FALSE	Interneuron_2	3.24343	4.65334
0.39339	0.104792	0.484	0.477	1	DS_vs_CTL	SoloTE-L1PA17	0.402424	FALSE	Interneuron_2	2.46421	3.77998
2.18646e-06	0.103293	0.095	0.078	0.00236575	DS_vs_CTL	SoloTE-Tigger18a	9.07936e-06	FALSE	Interneuron_2	0.323825	0.442332
6.63572e-06	0.10291	0.112	0.092	0.00717984	DS_vs_CTL	SoloTE-LTR8	2.30603e-05	FALSE	Interneuron_2	0.389586	0.480632
1.16177e-06	0.102272	0.148	0.124	0.00125704	DS_vs_CTL	SoloTE-MLT1N2	5.32026e-06	FALSE	Interneuron_2	0.531885	0.721087
0.00214927	0.10113	0.23	0.207	1	DS_vs_CTL	SoloTE-MER20B	0.00329106	FALSE	Interneuron_2	0.851428	1.18256
0.0784121	0.100591	0.544	0.543	1	DS_vs_CTL	SoloTE-Charlie1a	0.0881237	FALSE	Interneuron_2	2.97635	3.75921
3.60894e-05	0.100362	0.769	0.815	0.0390487	DS_vs_CTL	SoloTE-L1MB3	9.66328e-05	FALSE	Interneuron_2	6.85782	11.7936
0.0015698	0.100254	0.08	0.068	1	DS_vs_CTL	SoloTE-MADE2	0.00251323	FALSE	Interneuron_2	0.230002	0.286424
0.078637	0.0993997	0.834	0.85	1	DS_vs_CTL	SoloTE-L1PA5	0.0881742	FALSE	Interneuron_2	8.31705	13.6655
2.05358e-07	0.0981187	0.169	0.142	0.000222197	DS_vs_CTL	SoloTE-MER101-int	1.34167e-06	FALSE	Interneuron_2	0.55279	0.702967
0.0904913	0.0978309	0.533	0.531	1	DS_vs_CTL	SoloTE-MER5B	0.100774	FALSE	Interneuron_2	2.68071	3.76484
0.00226702	0.0977134	0.208	0.186	1	DS_vs_CTL	SoloTE-MSTB1	0.00339115	FALSE	Interneuron_2	0.705828	0.998308
0.068173	0.0974386	0.055	0.049	1	DS_vs_CTL	SoloTE-MamRep4096	0.0775052	FALSE	Interneuron_2	0.163392	0.186037
0.152163	0.0961867	0.986	0.991	1	DS_vs_CTL	SoloTE-MIR	0.165689	FALSE	Interneuron_2	20.7015	29.6986
0.0323464	0.0958623	0.37	0.342	1	DS_vs_CTL	SoloTE-THE1D	0.0388474	FALSE	Interneuron_2	1.75155	2.6216
0.00432061	0.0954244	0.179	0.159	1	DS_vs_CTL	SoloTE-Harlequin-int	0.00606618	FALSE	Interneuron_2	0.892636	0.819095
0.00164126	0.0935329	0.314	0.283	1	DS_vs_CTL	SoloTE-MIR1-Amn	0.00260264	FALSE	Interneuron_2	1.00296	1.42615
0.336398	0.0932539	0.346	0.329	1	DS_vs_CTL	SoloTE-L1ME3D	0.348489	FALSE	Interneuron_2	1.53217	2.15001
0.0630539	0.0930502	0.055	0.048	1	DS_vs_CTL	SoloTE-MER9a3	0.0723569	FALSE	Interneuron_2	0.188412	0.189048
0.458007	0.0929984	0.393	0.389	1	DS_vs_CTL	SoloTE-HAL1ME	0.466577	FALSE	Interneuron_2	1.90599	2.92631
6.76988e-08	0.0911389	0.132	0.108	7.32501e-05	DS_vs_CTL	SoloTE-LTR7	6.00596e-07	FALSE	Interneuron_2	0.465021	0.501958
1.07513e-05	0.0894652	0.111	0.093	0.0116329	DS_vs_CTL	SoloTE-MER44C	3.3988e-05	FALSE	Interneuron_2	0.294822	0.423081
2.34319e-07	0.0880957	0.138	0.113	0.000253534	DS_vs_CTL	SoloTE-LTR49-int	1.45949e-06	FALSE	Interneuron_2	0.554885	0.729293
0.00023441	0.0865379	0.99	0.993	0.253631	DS_vs_CTL	SoloTE-L2c	0.000466914	FALSE	Interneuron_2	21.3678	34.3931
0.0246093	0.0863089	0.085	0.075	1	DS_vs_CTL	SoloTE-Charlie25	0.0302219	FALSE	Interneuron_2	0.304057	0.392374
0.00410835	0.0861987	0.062	0.053	1	DS_vs_CTL	SoloTE-Helitron3Na-Mam	0.00578474	FALSE	Interneuron_2	0.199157	0.274005
0.00673388	0.0860401	0.575	0.587	1	DS_vs_CTL	SoloTE-L1MC2	0.00906484	FALSE	Interneuron_2	3.24506	4.94581
2.15038e-05	0.0853145	0.154	0.132	0.0232671	DS_vs_CTL	SoloTE-MER4D1	6.12609e-05	FALSE	Interneuron_2	0.529581	0.600199
2.06979e-05	0.0831907	0.248	0.217	0.0223951	DS_vs_CTL	SoloTE-MER1B	6.00117e-05	FALSE	Interneuron_2	0.802481	1.1956
0.036403	0.0824154	0.771	0.796	1	DS_vs_CTL	SoloTE-L1PB1	0.04319	FALSE	Interneuron_2	6.4654	9.56617
0.000105796	0.0805569	0.165	0.144	0.114471	DS_vs_CTL	SoloTE-MLT1J2	0.000241116	FALSE	Interneuron_2	0.836692	1.01948
0.015653	0.0804749	0.251	0.231	1	DS_vs_CTL	SoloTE-Charlie7	0.0199739	FALSE	Interneuron_2	0.990411	1.33874
3.85752e-05	0.0802165	0.189	0.164	0.0417384	DS_vs_CTL	SoloTE-Charlie8	0.000102172	FALSE	Interneuron_2	0.724304	0.930808
0.0798907	0.0762293	0.822	0.841	1	DS_vs_CTL	SoloTE-L1MC5a	0.0893754	FALSE	Interneuron_2	7.00684	10.026
0.00328465	0.0754293	0.265	0.242	1	DS_vs_CTL	SoloTE-L1M4a1	0.00467871	FALSE	Interneuron_2	1.17535	1.62632
4.43086e-05	0.0753622	0.09	0.076	0.0479419	DS_vs_CTL	SoloTE-L1MEg1	0.000112819	FALSE	Interneuron_2	0.272554	0.395289
0.494126	0.0748049	0.462	0.447	1	DS_vs_CTL	SoloTE-MLT1B	0.502328	FALSE	Interneuron_2	2.14598	3.08708
0.00529446	0.0741708	0.218	0.199	1	DS_vs_CTL	SoloTE-L1ME3C	0.00726691	FALSE	Interneuron_2	0.846141	1.26554
5.56291e-06	0.0723155	0.165	0.142	0.00601907	DS_vs_CTL	SoloTE-MSTA-int	1.96103e-05	FALSE	Interneuron_2	0.558649	0.838749
0.00258793	0.0714248	0.231	0.212	1	DS_vs_CTL	SoloTE-Tigger2a	0.00376775	FALSE	Interneuron_2	0.848608	1.10533
0.0133498	0.0701504	0.771	0.795	1	DS_vs_CTL	SoloTE-L1MC5	0.0172142	FALSE	Interneuron_2	6.4992	9.17715
1.01512e-07	0.0693071	0.127	0.105	0.000109836	DS_vs_CTL	SoloTE-MER53	8.15426e-07	FALSE	Interneuron_2	0.431773	0.601794
5.09252e-06	0.0689522	0.093	0.077	0.0055101	DS_vs_CTL	SoloTE-LTR5B	1.8348e-05	FALSE	Interneuron_2	0.3497	0.361298
1.80162e-06	0.0685868	0.105	0.09	0.00194935	DS_vs_CTL	SoloTE-Arthur1B	7.61029e-06	FALSE	Interneuron_2	0.307488	0.422844
2.70172e-05	0.0682302	0.055	0.045	0.0292326	DS_vs_CTL	SoloTE-Charlie9	7.56482e-05	FALSE	Interneuron_2	0.173998	0.229336
0.418862	0.0676124	0.326	0.312	1	DS_vs_CTL	SoloTE-MER30	0.427588	FALSE	Interneuron_2	1.56851	1.97559
0.218012	0.0670387	0.885	0.895	1	DS_vs_CTL	SoloTE-L1MC4	0.230726	FALSE	Interneuron_2	9.46729	14.4133
0.0331403	0.0654489	0.184	0.169	1	DS_vs_CTL	SoloTE-LTR7B	0.0396067	FALSE	Interneuron_2	0.816722	0.798842
0.837721	0.064523	0.83	0.826	1	DS_vs_CTL	SoloTE-Tigger1	0.841154	FALSE	Interneuron_2	6.52378	8.70001
0.0100958	0.0641889	0.064	0.056	1	DS_vs_CTL	SoloTE-MER96B	0.0132625	FALSE	Interneuron_2	0.227106	0.293227
0.00884348	0.0629605	0.059	0.051	1	DS_vs_CTL	SoloTE-LTR37A	0.0116801	FALSE	Interneuron_2	0.211001	0.282867
3.36643e-05	0.061561	0.154	0.136	0.0364248	DS_vs_CTL	SoloTE-Tigger3c	9.11354e-05	FALSE	Interneuron_2	0.476607	0.657048
0.0242572	0.0594718	0.148	0.136	1	DS_vs_CTL	SoloTE-MER41B	0.0299396	FALSE	Interneuron_2	0.572589	0.705249
2.04435e-05	0.0579948	0.276	0.248	0.0221198	DS_vs_CTL	SoloTE-MER39	5.96268e-05	FALSE	Interneuron_2	0.686575	0.754608
0.00215623	0.0576336	0.13	0.117	1	DS_vs_CTL	SoloTE-MER68	0.00329144	FALSE	Interneuron_2	0.409658	0.608985
0.35271	0.0561878	0.478	0.462	1	DS_vs_CTL	SoloTE-L1MC	0.363084	FALSE	Interneuron_2	2.32513	3.11464
0.1464	0.0549951	0.861	0.878	1	DS_vs_CTL	SoloTE-MIR3	0.159768	FALSE	Interneuron_2	7.97055	11.2343
0.00607838	0.0542975	0.095	0.086	1	DS_vs_CTL	SoloTE-AluYh3a3	0.00822764	FALSE	Interneuron_2	0.352604	0.384555
0.00316148	0.0522771	0.061	0.052	1	DS_vs_CTL	SoloTE-LTR84b	0.0045164	FALSE	Interneuron_2	0.230052	0.237617
0.0160897	0.0505094	0.062	0.053	1	DS_vs_CTL	SoloTE-MLT1E1	0.0204779	FALSE	Interneuron_2	0.165244	0.196727
0.000199872	0.0495883	0.189	0.168	0.216261	DS_vs_CTL	SoloTE-AluYi6	0.000404698	FALSE	Interneuron_2	0.742693	0.727157
0.00254401	0.0468433	0.081	0.072	1	DS_vs_CTL	SoloTE-MER4B-int	0.00372108	FALSE	Interneuron_2	0.29705	0.34966
2.97457e-09	0.0466299	0.094	0.078	3.21849e-06	DS_vs_CTL	SoloTE-Charlie15a	4.85847e-08	FALSE	Interneuron_2	0.2954	0.422985
0.185507	0.0462007	0.417	0.429	1	DS_vs_CTL	SoloTE-L1PA14	0.198036	FALSE	Interneuron_2	1.86671	3.1732
0.000987309	0.0439169	0.081	0.072	1	DS_vs_CTL	SoloTE-MER61-int	0.00166821	FALSE	Interneuron_2	0.323605	0.397881
0.000699336	0.0423332	0.069	0.06	0.756682	DS_vs_CTL	SoloTE-MER4D	0.00123264	FALSE	Interneuron_2	0.211893	0.239876
0.000354846	0.0396605	0.086	0.075	0.383943	DS_vs_CTL	SoloTE-MER45A	0.000669814	FALSE	Interneuron_2	0.251802	0.339698
1.18044e-07	0.0391645	0.298	0.262	0.000127724	DS_vs_CTL	SoloTE-AluYc3	8.76387e-07	FALSE	Interneuron_2	1.0117	1.09814
3.55914e-11	0.0374912	0.159	0.133	3.85099e-08	DS_vs_CTL	SoloTE-MER44A	9.68878e-10	FALSE	Interneuron_2	0.495864	0.688247
0.605976	0.0354308	0.388	0.378	1	DS_vs_CTL	SoloTE-MER58B	0.613489	FALSE	Interneuron_2	1.6631	2.20742
0.253176	0.0353012	0.314	0.303	1	DS_vs_CTL	SoloTE-MamRTE1	0.266215	FALSE	Interneuron_2	1.1084	1.74805
0.000129352	0.0349679	0.138	0.123	0.139959	DS_vs_CTL	SoloTE-MER102c	0.000284227	FALSE	Interneuron_2	0.450741	0.661238
0.156385	0.034061	0.823	0.839	1	DS_vs_CTL	SoloTE-L1ME4a	0.169908	FALSE	Interneuron_2	7.29982	10.4188
0.301192	0.0334711	0.581	0.596	1	DS_vs_CTL	SoloTE-L1MA8	0.314008	FALSE	Interneuron_2	3.4235	5.23831
0.534662	0.0319012	0.93	0.932	1	DS_vs_CTL	SoloTE-AluSg7	0.542411	FALSE	Interneuron_2	12.7043	13.9756
0.906203	0.0311165	0.961	0.959	1	DS_vs_CTL	SoloTE-AluSx4	0.906203	FALSE	Interneuron_2	16.4275	18.2692
0.874754	0.0310801	0.462	0.455	1	DS_vs_CTL	SoloTE-L1M3	0.876543	FALSE	Interneuron_2	2.28777	3.06171
0.0381186	0.0264978	0.248	0.237	1	DS_vs_CTL	SoloTE-MER112	0.0450509	FALSE	Interneuron_2	0.953395	1.28469
4.51188e-05	0.0253247	0.151	0.136	0.0488186	DS_vs_CTL	SoloTE-L1MEb	0.00011396	FALSE	Interneuron_2	0.564729	0.840156
0.0476885	0.0236754	0.063	0.056	1	DS_vs_CTL	SoloTE-MER67C	0.0557694	FALSE	Interneuron_2	0.231153	0.272678
7.9043e-06	0.0232011	0.26	0.233	0.00855245	DS_vs_CTL	SoloTE-MER4-int	2.65281e-05	FALSE	Interneuron_2	1.12481	1.19844
0.24105	0.022582	0.996	0.993	1	DS_vs_CTL	SoloTE-AluSq	0.254009	FALSE	Interneuron_2	29.2464	32.6396
4.31302e-05	0.0213838	0.335	0.305	0.0466669	DS_vs_CTL	SoloTE-MLT1A	0.000112414	FALSE	Interneuron_2	1.36593	1.68149
0.363621	0.0193628	0.998	0.999	1	DS_vs_CTL	SoloTE-AluSc	0.373531	FALSE	Interneuron_2	49.7449	54.5234
0.179868	0.0181889	0.673	0.691	1	DS_vs_CTL	SoloTE-MER5A	0.192731	FALSE	Interneuron_2	4.21348	5.77595
0.000228554	0.0173723	0.128	0.115	0.247296	DS_vs_CTL	SoloTE-MER47A	0.000457109	FALSE	Interneuron_2	0.41008	0.629941
0.0351058	0.0168952	0.402	0.387	1	DS_vs_CTL	SoloTE-AluYk4	0.0418536	FALSE	Interneuron_2	1.84764	1.95631
0.00213953	0.0162161	0.615	0.654	1	DS_vs_CTL	SoloTE-L1PA13	0.00329087	FALSE	Interneuron_2	3.74156	5.91492
1.67319e-07	0.0151333	0.154	0.132	0.000181039	DS_vs_CTL	SoloTE-L1M2a	1.1387e-06	FALSE	Interneuron_2	0.477723	0.631257
0.83136	0.0148966	0.91	0.906	1	DS_vs_CTL	SoloTE-AluSg4	0.836482	FALSE	Interneuron_2	10.3445	11.3836
0.000887096	0.0129604	0.184	0.17	0.959837	DS_vs_CTL	SoloTE-HSMAR2	0.00151455	FALSE	Interneuron_2	0.658448	0.979539
1.30623e-07	0.0128177	0.062	0.048	0.000141334	DS_vs_CTL	SoloTE-MER92-int	9.55301e-07	FALSE	Interneuron_2	0.210533	0.270906
5.43173e-06	0.0120241	0.069	0.057	0.00587713	DS_vs_CTL	SoloTE-HERVK-int	1.92866e-05	FALSE	Interneuron_2	0.358767	0.499296
4.98756e-08	0.0114475	0.05	0.038	5.39654e-05	DS_vs_CTL	SoloTE-MLT1D-int	4.79197e-07	FALSE	Interneuron_2	0.158727	0.227499
0.00297854	0.0111544	0.076	0.068	1	DS_vs_CTL	SoloTE-MER65A	0.0042926	FALSE	Interneuron_2	0.255766	0.306735
3.50507e-05	0.00913168	0.24	0.218	0.0379248	DS_vs_CTL	SoloTE-L1PA12	9.43672e-05	FALSE	Interneuron_2	1.02975	1.2646
0.056489	0.008779	1	1	1	DS_vs_CTL	SoloTE-AluSp	0.0652895	FALSE	Interneuron_2	81.4726	89.2272
8.30489e-08	0.00871578	0.05	0.039	8.98589e-05	DS_vs_CTL	SoloTE-MamGypLTR3	7.0162e-07	FALSE	Interneuron_2	0.140174	0.149994
0.000145872	0.00721784	0.076	0.065	0.157834	DS_vs_CTL	SoloTE-LTR37-int	0.000309426	FALSE	Interneuron_2	0.248794	0.301207
0.0172226	0.00673847	0.896	0.899	1	DS_vs_CTL	SoloTE-L1PA4	0.0218064	FALSE	Interneuron_2	11.1711	16.2987
0.692696	0.00650476	0.445	0.454	1	DS_vs_CTL	SoloTE-MER2	0.698397	FALSE	Interneuron_2	2.10353	2.97195
0.255633	0.00598192	0.748	0.733	1	DS_vs_CTL	SoloTE-AluYc	0.268223	FALSE	Interneuron_2	5.4862	5.81515
8.07623e-07	0.00546837	0.12	0.104	0.000873848	DS_vs_CTL	SoloTE-Cheshire	3.87976e-06	FALSE	Interneuron_2	0.414525	0.565417
0.000169297	0.00526379	0.228	0.213	0.183179	DS_vs_CTL	SoloTE-MLT1F	0.000351506	FALSE	Interneuron_2	0.846538	1.04629
3.88323e-05	0.00510229	0.054	0.045	0.0420165	DS_vs_CTL	SoloTE-MER31B	0.0001023	FALSE	Interneuron_2	0.205164	0.27706
0.00502225	0.00364025	0.146	0.136	1	DS_vs_CTL	SoloTE-MamTip2	0.00695171	FALSE	Interneuron_2	0.422191	0.533931
0.0228631	0.00348707	0.086	0.08	1	DS_vs_CTL	SoloTE-MER34A	0.0283618	FALSE	Interneuron_2	0.280805	0.345006
0.0244706	0.00147394	0.746	0.776	1	DS_vs_CTL	SoloTE-L1ME4b	0.0301271	FALSE	Interneuron_2	6.10966	8.50414
1.24201e-05	0.00038853	0.233	0.215	0.0134386	DS_vs_CTL	SoloTE-MER113	3.82759e-05	FALSE	Interneuron_2	0.743866	0.984617
0.0182451	-0.000765	0.081	0.075	1	DS_vs_CTL	SoloTE-Tigger3	0.0229823	FALSE	Interneuron_2	0.309616	0.40137
0.0623981	-0.00299406	0.28	0.271	1	DS_vs_CTL	SoloTE-L4-A-Mam	0.0717724	FALSE	Interneuron_2	0.934108	1.36862
0.000107137	-0.00333986	0.923	0.942	0.115923	DS_vs_CTL	SoloTE-MIRc	0.000243043	FALSE	Interneuron_2	10.9274	15.4738
1.71694e-05	-0.00404328	0.054	0.046	0.0185773	DS_vs_CTL	SoloTE-MamRep1151	5.12988e-05	FALSE	Interneuron_2	0.180515	0.29402
1.79919e-06	-0.00759332	0.081	0.07	0.00194673	DS_vs_CTL	SoloTE-HERVIP10FH-int	7.61029e-06	FALSE	Interneuron_2	0.296342	0.350366
0.00607196	-0.00761014	1	1	1	DS_vs_CTL	SoloTE-AluSq2	0.00822764	FALSE	Interneuron_2	79.6857	86.6684
3.88439e-06	-0.00778964	0.055	0.046	0.00420291	DS_vs_CTL	SoloTE-MamGypsy2-I	1.47546e-05	FALSE	Interneuron_2	0.154518	0.244141
0.00376538	-0.00794744	0.87	0.897	1	DS_vs_CTL	SoloTE-L1M4	0.00531711	FALSE	Interneuron_2	9.19328	12.1381
0.0483992	-0.00959562	1	1	1	DS_vs_CTL	SoloTE-AluY	0.0563316	FALSE	Interneuron_2	194.888	202.255
0.180144	-0.0104635	0.997	0.998	1	DS_vs_CTL	SoloTE-AluSc8	0.192731	FALSE	Interneuron_2	34.9828	38.0261
0.292108	-0.0110533	0.423	0.419	1	DS_vs_CTL	SoloTE-MER33	0.305187	FALSE	Interneuron_2	2.00457	2.65965
2.92111e-06	-0.0127071	0.115	0.1	0.00316064	DS_vs_CTL	SoloTE-MLT1H1	1.14508e-05	FALSE	Interneuron_2	0.392763	0.511931
0.0564954	-0.0129809	1	1	1	DS_vs_CTL	SoloTE-AluSx3	0.0652895	FALSE	Interneuron_2	38.8975	43.156
0.000608589	-0.0148322	1	1	0.658493	DS_vs_CTL	SoloTE-AluSx1	0.00107823	FALSE	Interneuron_2	157.501	172.969
0.00512936	-0.0150746	1	0.999	1	DS_vs_CTL	SoloTE-AluSg	0.00707996	FALSE	Interneuron_2	52.9186	57.7848
0.00112415	-0.0158864	0.086	0.078	1	DS_vs_CTL	SoloTE-MER119	0.00187998	FALSE	Interneuron_2	0.307066	0.518802
1.46836e-07	-0.0158959	0.102	0.088	0.000158876	DS_vs_CTL	SoloTE-MLT1F1	1.01683e-06	FALSE	Interneuron_2	0.362985	0.471122
0.000312513	-0.0169977	0.069	0.062	0.33814	DS_vs_CTL	SoloTE-LTR54	0.000600516	FALSE	Interneuron_2	0.257588	0.322426
7.45558e-05	-0.0172529	1	1	0.0806694	DS_vs_CTL	SoloTE-AluSz	0.000174796	FALSE	Interneuron_2	132.869	148.245
2.10237e-05	-0.0182083	0.537	0.594	0.0227477	DS_vs_CTL	SoloTE-L1PA15	6.02982e-05	FALSE	Interneuron_2	3.18701	5.39745
0.000140902	-0.0184287	0.16	0.149	0.152456	DS_vs_CTL	SoloTE-MARNA	0.000301493	FALSE	Interneuron_2	0.525019	0.701962
0.00136147	-0.0200833	0.13	0.12	1	DS_vs_CTL	SoloTE-MER57A-int	0.00220171	FALSE	Interneuron_2	0.49142	0.622162
0.0015738	-0.0201408	0.072	0.065	1	DS_vs_CTL	SoloTE-MER34	0.00251323	FALSE	Interneuron_2	0.258305	0.302567
0.00229027	-0.0229725	0.519	0.501	1	DS_vs_CTL	SoloTE-AluYf1	0.0034007	FALSE	Interneuron_2	3.02719	3.09015
0.000184414	-0.0233771	0.181	0.17	0.199536	DS_vs_CTL	SoloTE-Tigger2b-Pri	0.000376512	FALSE	Interneuron_2	0.705697	0.843066
0.0637426	-0.0238443	0.141	0.137	1	DS_vs_CTL	SoloTE-MER72B	0.0729763	FALSE	Interneuron_2	0.123862	0.0738831
2.00727e-05	-0.0240452	0.998	0.999	0.0217187	DS_vs_CTL	SoloTE-AluSz6	5.92509e-05	FALSE	Interneuron_2	52.8738	60.3358
7.64188e-05	-0.0255502	1	1	0.0826852	DS_vs_CTL	SoloTE-AluSx	0.000178311	FALSE	Interneuron_2	152.018	165.188
0.194863	-0.0272468	0.093	0.091	1	DS_vs_CTL	SoloTE-LTR106-Mam	0.207121	FALSE	Interneuron_2	0.109992	0.112492
0.102122	-0.0285555	0.87	0.866	1	DS_vs_CTL	SoloTE-AluYm1	0.112449	FALSE	Interneuron_2	8.82938	9.08026
0.0264931	-0.0310237	0.312	0.305	1	DS_vs_CTL	SoloTE-L1P1	0.0323731	FALSE	Interneuron_2	1.56017	1.82015
2.90144e-06	-0.0311247	0.091	0.08	0.00313936	DS_vs_CTL	SoloTE-MLT2A2	1.14508e-05	FALSE	Interneuron_2	0.257904	0.35158
4.48563e-07	-0.0312149	1	1	0.000485345	DS_vs_CTL	SoloTE-AluJb	2.31364e-06	FALSE	Interneuron_2	115.367	130.694
2.58e-06	-0.0312617	0.081	0.07	0.00279156	DS_vs_CTL	SoloTE-L1MDb	1.04479e-05	FALSE	Interneuron_2	0.255358	0.373532
3.14719e-05	-0.0347771	1	0.999	0.0340526	DS_vs_CTL	SoloTE-AluJr	8.56735e-05	FALSE	Interneuron_2	65.0634	72.5239
0.171836	-0.0348783	0.876	0.88	1	DS_vs_CTL	SoloTE-AluSc5	0.185054	FALSE	Interneuron_2	9.97114	10.7813
4.39136e-05	-0.0375507	0.126	0.115	0.0475146	DS_vs_CTL	SoloTE-MER41-int	0.000112819	FALSE	Interneuron_2	0.499074	0.703045
0.00125264	-0.0382502	0.332	0.32	1	DS_vs_CTL	SoloTE-ERVL-E-int	0.00205281	FALSE	Interneuron_2	1.33461	1.59531
0.309677	-0.0419391	0.436	0.439	1	DS_vs_CTL	SoloTE-MER3	0.322169	FALSE	Interneuron_2	2.03512	2.62326
0.012457	-0.0435836	0.204	0.201	1	DS_vs_CTL	SoloTE-Tigger17a	0.016148	FALSE	Interneuron_2	0.802771	1.06572
0.0007811	-0.0437149	0.496	0.542	0.84515	DS_vs_CTL	SoloTE-L1ME2z	0.00134767	FALSE	Interneuron_2	2.72539	3.99764
9.65973e-06	-0.0450437	0.193	0.183	0.0104518	DS_vs_CTL	SoloTE-MADE1	3.11399e-05	FALSE	Interneuron_2	0.7213	0.905948
6.25592e-09	-0.047122	0.413	0.374	6.7689e-06	DS_vs_CTL	SoloTE-HERVH-int	8.28486e-08	FALSE	Interneuron_2	2.37606	2.47737
1.74407e-07	-0.0489973	1	0.999	0.000188709	DS_vs_CTL	SoloTE-AluJo	1.17068e-06	FALSE	Interneuron_2	59.3541	65.8885
0.373322	-0.0512452	0.575	0.587	1	DS_vs_CTL	SoloTE-L1MD	0.382694	FALSE	Interneuron_2	3.33213	4.14098
0.043758	-0.0525931	0.086	0.082	1	DS_vs_CTL	SoloTE-Charlie15b	0.0514182	FALSE	Interneuron_2	0.319186	0.421532
3.47454e-07	-0.0578877	0.064	0.055	0.000375945	DS_vs_CTL	SoloTE-LTR50	2.00297e-06	FALSE	Interneuron_2	0.181582	0.229426
0.0107884	-0.0584136	0.061	0.058	1	DS_vs_CTL	SoloTE-MLT2C1	0.014022	FALSE	Interneuron_2	0.185173	0.234225
0.000114767	-0.0616343	0.094	0.085	0.124178	DS_vs_CTL	SoloTE-MER21-int	0.000259151	FALSE	Interneuron_2	0.321212	0.444077
0.281161	-0.0626663	0.361	0.372	1	DS_vs_CTL	SoloTE-L1MD3	0.294378	FALSE	Interneuron_2	1.59025	2.24883
0.0381554	-0.062924	0.666	0.667	1	DS_vs_CTL	SoloTE-FRAM	0.0450509	FALSE	Interneuron_2	4.21324	4.39415
1.76029e-06	-0.0631684	0.07	0.062	0.00190464	DS_vs_CTL	SoloTE-L1M3a	7.56617e-06	FALSE	Interneuron_2	0.256697	0.338376
0.00230736	-0.0651522	0.115	0.109	1	DS_vs_CTL	SoloTE-MER50	0.00341573	FALSE	Interneuron_2	0.432828	0.536031
0.139683	-0.0672264	0.174	0.177	1	DS_vs_CTL	SoloTE-Charlie1b	0.152779	FALSE	Interneuron_2	0.80914	1.14262
0.00112964	-0.0689496	0.06	0.054	1	DS_vs_CTL	SoloTE-HERV4-I-int	0.00188274	FALSE	Interneuron_2	0.311635	0.348292
6.93485e-06	-0.0691868	0.125	0.117	0.00750351	DS_vs_CTL	SoloTE-MER94	2.36476e-05	FALSE	Interneuron_2	0.416766	0.64379
0.000609529	-0.0718556	0.292	0.286	0.659511	DS_vs_CTL	SoloTE-Charlie4z	0.00107823	FALSE	Interneuron_2	1.12456	1.42487
0.00120151	-0.0731496	0.182	0.175	1	DS_vs_CTL	SoloTE-Tigger4	0.00198899	FALSE	Interneuron_2	0.645329	0.849707
0.000158186	-0.0742604	0.31	0.301	0.171157	DS_vs_CTL	SoloTE-MSTB	0.000332666	FALSE	Interneuron_2	1.28095	1.72497
3.76761e-07	-0.0760179	0.084	0.074	0.000407655	DS_vs_CTL	SoloTE-LTR78B	2.09787e-06	FALSE	Interneuron_2	0.27988	0.398482
0.000144222	-0.0800029	0.949	0.954	0.156048	DS_vs_CTL	SoloTE-FLAM-C	0.000307255	FALSE	Interneuron_2	13.7188	14.5199
1.18113e-05	-0.081765	0.066	0.059	0.0127798	DS_vs_CTL	SoloTE-Charlie10	3.66298e-05	FALSE	Interneuron_2	0.280648	0.347233
0.000605479	-0.0825478	0.612	0.657	0.655129	DS_vs_CTL	SoloTE-L1PA10	0.00107823	FALSE	Interneuron_2	4.3745	6.41766
0.0281371	-0.0826144	0.068	0.067	1	DS_vs_CTL	SoloTE-Tigger16a	0.0340424	FALSE	Interneuron_2	0.2142	0.362725
2.35305e-07	-0.0826296	0.154	0.143	0.0002546	DS_vs_CTL	SoloTE-MER58C	1.45949e-06	FALSE	Interneuron_2	0.601992	0.802932
0.0468704	-0.0828183	0.116	0.115	1	DS_vs_CTL	SoloTE-LTR17	0.0549438	FALSE	Interneuron_2	0.425704	0.510762
0.00152324	-0.08681	0.075	0.071	1	DS_vs_CTL	SoloTE-LTR67B	0.00245523	FALSE	Interneuron_2	0.266108	0.3397
0.0239577	-0.0871401	0.458	0.465	1	DS_vs_CTL	SoloTE-AluSq10	0.0296447	FALSE	Interneuron_2	2.34918	2.44734
0.000482138	-0.0888679	0.26	0.257	0.521673	DS_vs_CTL	SoloTE-MLT1A1	0.000878244	FALSE	Interneuron_2	1.04259	1.25546
2.23292e-07	-0.0889136	0.927	0.947	0.000241602	DS_vs_CTL	SoloTE-L1PA3	1.43965e-06	FALSE	Interneuron_2	15.0102	18.5481
0.000261693	-0.0896684	0.062	0.056	0.283152	DS_vs_CTL	SoloTE-LTR37B	0.000512919	FALSE	Interneuron_2	0.20655	0.241694
0.0211566	-0.0898561	0.848	0.854	1	DS_vs_CTL	SoloTE-AluYa5	0.0263785	FALSE	Interneuron_2	8.87736	9.16109
6.48921e-05	-0.0910624	0.052	0.046	0.0702133	DS_vs_CTL	SoloTE-MER4A	0.000155108	FALSE	Interneuron_2	0.196321	0.238551
8.85305e-05	-0.0917655	0.115	0.107	0.09579	DS_vs_CTL	SoloTE-MER31-int	0.000204622	FALSE	Interneuron_2	0.395781	0.422483
1.35996e-05	-0.092026	0.28	0.269	0.0147147	DS_vs_CTL	SoloTE-L1P3	4.139e-05	FALSE	Interneuron_2	1.18494	1.70187
2.18025e-05	-0.0921407	0.195	0.188	0.0235903	DS_vs_CTL	SoloTE-MLT1G3	6.13978e-05	FALSE	Interneuron_2	0.749706	0.876738
0.094019	-0.0938613	0.242	0.248	1	DS_vs_CTL	SoloTE-Tigger4a	0.104229	FALSE	Interneuron_2	1.07872	1.4932
0.0079733	-0.0980111	0.49	0.5	1	DS_vs_CTL	SoloTE-FAM	0.0106456	FALSE	Interneuron_2	2.2917	2.51663
0.000216119	-0.102508	0.07	0.065	0.233841	DS_vs_CTL	SoloTE-L1PBa1	0.00043401	FALSE	Interneuron_2	0.216996	0.293773
0.00243579	-0.103342	0.726	0.756	1	DS_vs_CTL	SoloTE-FLAM-A	0.003595	FALSE	Interneuron_2	5.46301	6.03799
0.000506195	-0.103952	0.054	0.049	0.547703	DS_vs_CTL	SoloTE-MER34B-int	0.00091526	FALSE	Interneuron_2	0.230153	0.232835
0.000166969	-0.105131	0.058	0.052	0.180661	DS_vs_CTL	SoloTE-Charlie23a	0.000348149	FALSE	Interneuron_2	0.196796	0.270456
0.00461688	-0.105607	0.145	0.146	1	DS_vs_CTL	SoloTE-CR1-Mam	0.00642691	FALSE	Interneuron_2	0.472095	0.686156
4.23566e-05	-0.106605	0.112	0.109	0.0458298	DS_vs_CTL	SoloTE-MER2B	0.000110988	FALSE	Interneuron_2	0.393456	0.503701
2.99006e-05	-0.110644	0.602	0.656	0.0323525	DS_vs_CTL	SoloTE-L1MC3	8.18509e-05	FALSE	Interneuron_2	3.5819	5.6904
1.8373e-11	-0.111171	0.05	0.04	1.98796e-08	DS_vs_CTL	SoloTE-Tigger9a	6.3713e-10	FALSE	Interneuron_2	0.16444	0.213358
0.0028316	-0.112874	0.18	0.183	1	DS_vs_CTL	SoloTE-Charlie2a	0.00410498	FALSE	Interneuron_2	0.644352	0.788803
0.00586089	-0.115697	0.077	0.075	1	DS_vs_CTL	SoloTE-Zaphod	0.00797733	FALSE	Interneuron_2	0.285329	0.342767
4.21061e-08	-0.117324	0.153	0.144	4.55588e-05	DS_vs_CTL	SoloTE-Charlie4a	4.21061e-07	FALSE	Interneuron_2	0.548378	0.74581
0.0195362	-0.121055	0.305	0.319	1	DS_vs_CTL	SoloTE-L3b	0.0245455	FALSE	Interneuron_2	1.1513	1.77614
5.39982e-05	-0.126447	0.457	0.466	0.0584261	DS_vs_CTL	SoloTE-AluYk3	0.000132296	FALSE	Interneuron_2	2.30684	2.38561
7.069e-05	-0.129076	0.345	0.343	0.0764866	DS_vs_CTL	SoloTE-L1PB2	0.000167334	FALSE	Interneuron_2	1.41635	1.8564
0.00172018	-0.131134	0.114	0.112	1	DS_vs_CTL	SoloTE-Charlie29a	0.00271899	FALSE	Interneuron_2	0.32753	0.439973
0.000591972	-0.131176	0.067	0.063	0.640514	DS_vs_CTL	SoloTE-Tigger5b	0.00105864	FALSE	Interneuron_2	0.23901	0.331127
1.30728e-06	-0.132849	0.699	0.695	0.00141448	DS_vs_CTL	SoloTE-AluYj4	5.77088e-06	FALSE	Interneuron_2	4.99139	4.8426
0.017485	-0.1352	0.32	0.331	1	DS_vs_CTL	SoloTE-Alu	0.0220816	FALSE	Interneuron_2	1.54565	1.56221
0.00561937	-0.137816	0.255	0.262	1	DS_vs_CTL	SoloTE-MLT1H	0.00766989	FALSE	Interneuron_2	0.980501	1.26372
0.000457731	-0.140956	0.057	0.055	0.495265	DS_vs_CTL	SoloTE-LTR2	0.000840031	FALSE	Interneuron_2	0.198168	0.205456
6.62608e-12	-0.141222	0.952	0.961	7.16942e-09	DS_vs_CTL	SoloTE-AluJr4	2.49752e-10	FALSE	Interneuron_2	15.1956	17.0374
0.0482306	-0.142689	0.083	0.084	1	DS_vs_CTL	SoloTE-LTR25-int	0.0562691	FALSE	Interneuron_2	0.296143	0.314374
4.34296e-05	-0.143229	0.503	0.516	0.0469908	DS_vs_CTL	SoloTE-AluYe5	0.000112595	FALSE	Interneuron_2	2.93684	2.89195
0.000512365	-0.149888	0.098	0.097	0.554379	DS_vs_CTL	SoloTE-MER4E	0.00092301	FALSE	Interneuron_2	0.288492	0.294668
5.79934e-05	-0.163772	0.089	0.086	0.0627488	DS_vs_CTL	SoloTE-MamRep38	0.000140824	FALSE	Interneuron_2	0.313631	0.40109
0.0266141	-0.166788	0.064	0.065	1	DS_vs_CTL	SoloTE-HERVIP10B3-int	0.03244	FALSE	Interneuron_2	0.229984	0.245428
4.57725e-05	-0.167047	0.492	0.523	0.0495258	DS_vs_CTL	SoloTE-AluSq4	0.000115018	FALSE	Interneuron_2	2.82101	3.00094
0.0017867	-0.176311	0.263	0.283	1	DS_vs_CTL	SoloTE-Plat-L3	0.00281506	FALSE	Interneuron_2	0.505001	0.65149
0.000136088	-0.178381	0.132	0.131	0.147248	DS_vs_CTL	SoloTE-AluYd8	0.000293759	FALSE	Interneuron_2	0.614071	0.590844
1.00016e-08	-0.179046	0.835	0.855	1.08217e-05	DS_vs_CTL	SoloTE-L1PA2	1.19531e-07	FALSE	Interneuron_2	9.5004	10.2916
0.000125219	-0.179584	0.383	0.398	0.135487	DS_vs_CTL	SoloTE-AluYk2	0.000276384	FALSE	Interneuron_2	1.71654	2.15274
1.04574e-07	-0.183218	0.591	0.609	0.000113149	DS_vs_CTL	SoloTE-L1MCa	8.26473e-07	FALSE	Interneuron_2	3.33096	4.72708
0.000124102	-0.186163	0.339	0.357	0.134278	DS_vs_CTL	SoloTE-L1P4	0.000275158	FALSE	Interneuron_2	1.31775	1.7105
1.25671e-06	-0.188942	0.091	0.089	0.00135976	DS_vs_CTL	SoloTE-AluYa8	5.64942e-06	FALSE	Interneuron_2	0.482543	0.430323
0.00135928	-0.192042	0.069	0.069	1	DS_vs_CTL	SoloTE-MER77	0.00220171	FALSE	Interneuron_2	0.228918	0.293264
0.00018327	-0.196175	0.069	0.072	0.198298	DS_vs_CTL	SoloTE-Tigger10	0.000375741	FALSE	Interneuron_2	0.205166	0.301228
7.22509e-10	-0.198024	0.751	0.77	7.81754e-07	DS_vs_CTL	SoloTE-AluYb8	1.44838e-08	FALSE	Interneuron_2	6.15294	5.90894
6.70412e-08	-0.20234	0.665	0.701	7.25386e-05	DS_vs_CTL	SoloTE-L1M1	6.00596e-07	FALSE	Interneuron_2	4.49795	6.0116
1.09427e-06	-0.203592	0.149	0.151	0.001184	DS_vs_CTL	SoloTE-MER65-int	5.05843e-06	FALSE	Interneuron_2	0.541008	0.613814
0.000755962	-0.211982	0.107	0.113	0.817951	DS_vs_CTL	SoloTE-MamRep434	0.00132293	FALSE	Interneuron_2	0.361959	0.439307
0.0161852	-0.212557	0.065	0.069	1	DS_vs_CTL	SoloTE-MER63D	0.020546	FALSE	Interneuron_2	0.245603	0.289956
0.000462499	-0.217629	0.071	0.072	0.500424	DS_vs_CTL	SoloTE-MER63C	0.000845613	FALSE	Interneuron_2	0.332897	0.372826
0.000260277	-0.221993	0.076	0.078	0.28162	DS_vs_CTL	SoloTE-Tigger8	0.000512192	FALSE	Interneuron_2	0.246563	0.294022
0.000350019	-0.224702	0.105	0.107	0.37872	DS_vs_CTL	SoloTE-MER21A	0.000667351	FALSE	Interneuron_2	0.389737	0.475646
0.315972	-0.234904	0.043	0.051	1	DS_vs_CTL	SoloTE-MamTip1	0.328021	FALSE	Interneuron_2	0.112581	0.102014
9.80815e-06	-0.251516	0.172	0.185	0.0106124	DS_vs_CTL	SoloTE-MER74A	3.14117e-05	TRUE	Interneuron_2	0.464549	0.683625
0.00199775	-0.256414	0.072	0.077	1	DS_vs_CTL	SoloTE-MER106B	0.00309777	TRUE	Interneuron_2	0.211905	0.288158
0.00863158	-0.272543	0.094	0.104	1	DS_vs_CTL	SoloTE-AluYe6	0.011462	TRUE	Interneuron_2	0.383466	0.354482
4.16413e-07	-0.27292	0.288	0.316	0.000450559	DS_vs_CTL	SoloTE-AluYg6	2.21933e-06	TRUE	Interneuron_2	1.40899	1.441
6.83812e-05	-0.274802	0.069	0.071	0.0739885	DS_vs_CTL	SoloTE-HSMAR1	0.000162654	TRUE	Interneuron_2	0.244831	0.359604
4.1669e-07	-0.28526	0.244	0.275	0.000450859	DS_vs_CTL	SoloTE-Tigger19b	2.21933e-06	TRUE	Interneuron_2	1.15607	1.34299
0.00159595	-0.292035	0.069	0.073	1	DS_vs_CTL	SoloTE-LTR5-Hs	0.002539	TRUE	Interneuron_2	0.311101	0.313256
9.69439e-17	-0.307705	0.708	0.751	1.04893e-13	DS_vs_CTL	SoloTE-L1MDa	1.02994e-14	TRUE	Interneuron_2	4.66717	5.46021
1.6749e-05	-0.317035	0.122	0.136	0.0181224	DS_vs_CTL	SoloTE-Tigger9b	5.03497e-05	TRUE	Interneuron_2	0.363572	0.434086
2.9379e-05	-0.319424	0.053	0.058	0.0317881	DS_vs_CTL	SoloTE-MER58D	8.08747e-05	TRUE	Interneuron_2	0.175188	0.197042
1.47337e-07	-0.320524	0.102	0.11	0.000159418	DS_vs_CTL	SoloTE-MER104	1.01683e-06	TRUE	Interneuron_2	0.340805	0.447194
1.06622e-07	-0.332886	0.07	0.069	0.000115365	DS_vs_CTL	SoloTE-MER110-int	8.29279e-07	TRUE	Interneuron_2	0.340752	0.286072
1.94073e-10	-0.335881	0.201	0.217	2.09987e-07	DS_vs_CTL	SoloTE-MER41A	4.52836e-09	TRUE	Interneuron_2	0.89402	0.931704
0.000197985	-0.35463	0.132	0.157	0.21422	DS_vs_CTL	SoloTE-AluYk11	0.000402542	TRUE	Interneuron_2	0.634469	0.652968
4.52996e-08	-0.371862	0.266	0.315	4.90142e-05	DS_vs_CTL	SoloTE-L1P2	4.43936e-07	TRUE	Interneuron_2	1.17955	1.35182
5.87461e-05	-0.382733	0.077	0.087	0.0635633	DS_vs_CTL	SoloTE-MER11C	0.000141801	TRUE	Interneuron_2	0.298633	0.319514
2.10429e-05	-0.415766	0.107	0.121	0.0227684	DS_vs_CTL	SoloTE-L1M3c	6.02982e-05	TRUE	Interneuron_2	0.377382	0.456593
1.25562e-05	-0.435331	0.063	0.07	0.0135858	DS_vs_CTL	SoloTE-L1P4a	3.84535e-05	TRUE	Interneuron_2	0.331389	0.37551
0.00646451	-0.446654	0.046	0.056	1	DS_vs_CTL	SoloTE-MLT1F2-int	0.0087262	TRUE	Interneuron_2	0.244959	0.195277
6.09909e-09	-0.450185	0.142	0.17	6.59921e-06	DS_vs_CTL	SoloTE-MER8	8.28486e-08	TRUE	Interneuron_2	0.404946	0.532465
1.52294e-24	-0.451937	0.526	0.6	1.64782e-21	DS_vs_CTL	SoloTE-L1HS	3.7312e-22	TRUE	Interneuron_2	3.41699	3.23246
6.73358e-06	-0.46944	0.056	0.067	0.00728574	DS_vs_CTL	SoloTE-Chap1-Mam	2.32356e-05	TRUE	Interneuron_2	0.14911	0.205483
3.79504e-08	-0.470324	0.146	0.181	4.10624e-05	DS_vs_CTL	SoloTE-Kanga2-a	3.95654e-07	TRUE	Interneuron_2	0.540453	0.606934
0.000421609	-0.501578	0.049	0.06	0.456181	DS_vs_CTL	SoloTE-MER57E3	0.000776648	TRUE	Interneuron_2	0.228659	0.232758
1.13649e-07	-0.807715	0.042	0.057	0.000122968	DS_vs_CTL	SoloTE-MER66B	8.56736e-07	TRUE	Interneuron_2	0.218225	0.260304
1.23944e-25	-0.870748	0.193	0.263	1.34108e-22	DS_vs_CTL	SoloTE-L1PB	6.07327e-23	TRUE	Interneuron_2	0.865482	0.906986

## Sheet: Interneuron_3
p_val	avg_log2FC	pct.1	pct.2	p_val_adj	comparison	gene	FDR	sig	cellsubtype	CTL_expression	DS_expression
0.00870623	0.865026	0.088	0.053	1	DS_vs_CTL	SoloTE-Ricksha	0.0346621	TRUE	Interneuron_3	0.213622	0.333721
0.0147269	0.854955	0.06	0.032	1	DS_vs_CTL	SoloTE-LFSINE-Vert	0.0491878	TRUE	Interneuron_3	0.184061	0.311056
0.00364766	0.845659	0.078	0.043	1	DS_vs_CTL	SoloTE-MER4A1-	0.0186477	TRUE	Interneuron_3	0.0476959	0.0776363
0.000574083	0.841688	0.145	0.096	0.621158	DS_vs_CTL	SoloTE-MSTC	0.00487162	TRUE	Interneuron_3	0.417901	0.673413
0.0526528	0.833923	0.056	0.036	1	DS_vs_CTL	SoloTE-MER34-int	0.118712	FALSE	Interneuron_3	0.139743	0.143217
8.68224e-11	0.820655	0.35	0.242	9.39418e-08	DS_vs_CTL	SoloTE-MamSINE1	2.1749e-08	TRUE	Interneuron_3	0.834092	1.13486
0.0395333	0.796491	0.073	0.046	1	DS_vs_CTL	SoloTE-LTR10A	0.100732	FALSE	Interneuron_3	0.20292	0.2251
0.00693683	0.765516	0.073	0.041	1	DS_vs_CTL	SoloTE-MER63B	0.0297039	TRUE	Interneuron_3	0.207266	0.335563
0.00238087	0.764224	0.119	0.078	1	DS_vs_CTL	SoloTE-MER5C	0.013322	TRUE	Interneuron_3	0.392486	0.505322
0.000552097	0.711515	0.166	0.107	0.597369	DS_vs_CTL	SoloTE-MLT1J2	0.00476898	TRUE	Interneuron_3	0.836692	1.01948
0.0072953	0.704737	0.103	0.064	1	DS_vs_CTL	SoloTE-Tigger3	0.0303107	TRUE	Interneuron_3	0.309616	0.40137
0.000833594	0.703883	0.066	0.034	0.901949	DS_vs_CTL	SoloTE-MLT2B2	0.00642509	TRUE	Interneuron_3	0.146069	0.250657
0.0344028	0.703619	0.07	0.043	1	DS_vs_CTL	SoloTE-L2-1-AMi	0.0902399	FALSE	Interneuron_3	0.13656	0.30575
6.50722e-06	0.698107	0.171	0.1	0.00704081	DS_vs_CTL	SoloTE-Charlie19a	0.000135838	TRUE	Interneuron_3	0.324952	0.435723
0.00743431	0.686248	0.093	0.056	1	DS_vs_CTL	SoloTE-Tigger16a	0.0305294	TRUE	Interneuron_3	0.2142	0.362725
0.116701	0.680282	0.052	0.033	1	DS_vs_CTL	SoloTE-MLT1J1-int	0.204396	FALSE	Interneuron_3	0.114542	0.140153
1.87087e-07	0.678542	0.364	0.288	0.000202428	DS_vs_CTL	SoloTE-L1MA1	7.81087e-06	TRUE	Interneuron_3	1.43	2.91038
0.0208184	0.644712	0.07	0.042	1	DS_vs_CTL	SoloTE-MER50-int	0.0627199	FALSE	Interneuron_3	0.152337	0.190865
0.00168397	0.644322	0.166	0.111	1	DS_vs_CTL	SoloTE-CR1-Mam	0.0111009	TRUE	Interneuron_3	0.472095	0.686156
2.24267e-05	0.632858	0.201	0.125	0.0242656	DS_vs_CTL	SoloTE-MSTA-int	0.000321022	TRUE	Interneuron_3	0.558649	0.838749
0.0202641	0.63049	0.104	0.069	1	DS_vs_CTL	SoloTE-BLACKJACK	0.0619042	FALSE	Interneuron_3	0.319657	0.455314
7.4676e-08	0.629755	0.46	0.378	8.07995e-05	DS_vs_CTL	SoloTE-L1MA5	4.15697e-06	TRUE	Interneuron_3	1.71533	3.0412
4.45693e-05	0.629212	0.245	0.163	0.048224	DS_vs_CTL	SoloTE-MLT1E1A	0.000572545	TRUE	Interneuron_3	0.680537	1.08659
0.0459246	0.622168	0.088	0.059	1	DS_vs_CTL	SoloTE-MER63A	0.110313	FALSE	Interneuron_3	0.242636	0.365156
0.013862	0.621478	0.061	0.036	1	DS_vs_CTL	SoloTE-MER4A	0.0472439	TRUE	Interneuron_3	0.196321	0.238551
0.00821541	0.61206	0.147	0.109	1	DS_vs_CTL	SoloTE-MER57A-int	0.0331929	TRUE	Interneuron_3	0.49142	0.622162
0.0774013	0.611919	0.062	0.04	1	DS_vs_CTL	SoloTE-Tigger9a	0.154307	FALSE	Interneuron_3	0.16444	0.213358
0.00145902	0.611271	0.157	0.102	1	DS_vs_CTL	SoloTE-L1MEj	0.00987798	TRUE	Interneuron_3	0.511899	0.855615
0.00732056	0.60845	0.07	0.042	1	DS_vs_CTL	SoloTE-MamGyp-int	0.0303107	TRUE	Interneuron_3	0.120612	0.17886
0.00109003	0.607061	0.2	0.139	1	DS_vs_CTL	SoloTE-HSMAR2	0.00780148	TRUE	Interneuron_3	0.658448	0.979539
0.0230747	0.6038	0.113	0.077	1	DS_vs_CTL	SoloTE-MER21-int	0.0672119	FALSE	Interneuron_3	0.321212	0.444077
0.0531975	0.603453	0.051	0.031	1	DS_vs_CTL	SoloTE-MLT2F	0.118712	FALSE	Interneuron_3	0.126734	0.219043
0.192362	0.603269	0.053	0.037	1	DS_vs_CTL	SoloTE-MLT2C2	0.289298	FALSE	Interneuron_3	0.114967	0.153068
0.0454595	0.602301	0.082	0.054	1	DS_vs_CTL	SoloTE-Tigger10	0.110197	FALSE	Interneuron_3	0.205166	0.301228
0.000163713	0.591987	0.117	0.069	0.177138	DS_vs_CTL	SoloTE-MER104	0.00178305	TRUE	Interneuron_3	0.340805	0.447194
0.00958363	0.590372	0.104	0.066	1	DS_vs_CTL	SoloTE-MER63C	0.0363742	TRUE	Interneuron_3	0.332897	0.372826
0.0104351	0.580785	0.056	0.032	1	DS_vs_CTL	SoloTE-THE1C-int	0.0387257	TRUE	Interneuron_3	0.141505	0.319306
8.46419e-05	0.577738	0.224	0.147	0.0915825	DS_vs_CTL	SoloTE-Charlie1	0.000986177	TRUE	Interneuron_3	0.577154	0.759386
0.00659208	0.574993	0.143	0.096	1	DS_vs_CTL	SoloTE-L1PA15-16	0.0289705	TRUE	Interneuron_3	0.403693	0.499175
0.00527259	0.572174	0.057	0.032	1	DS_vs_CTL	SoloTE-MER57-int	0.0251578	TRUE	Interneuron_3	0.12584	0.206683
0.0180753	0.55883	0.057	0.035	1	DS_vs_CTL	SoloTE-LTR85a	0.0573147	FALSE	Interneuron_3	0.133621	0.210596
1.96504e-05	0.557194	0.347	0.265	0.0212618	DS_vs_CTL	SoloTE-L1PB3	0.000295978	TRUE	Interneuron_3	1.31327	2.1872
0.000332567	0.553727	0.247	0.173	0.359838	DS_vs_CTL	SoloTE-MER113	0.0031437	TRUE	Interneuron_3	0.743866	0.984617
0.047253	0.552803	0.056	0.036	1	DS_vs_CTL	SoloTE-Tigger20a	0.11168	FALSE	Interneuron_3	0.161106	0.271865
6.64225e-10	0.546431	0.643	0.581	7.18691e-07	DS_vs_CTL	SoloTE-L1MB2	9.16955e-08	TRUE	Interneuron_3	3.88423	6.40301
0.000223516	0.543764	0.242	0.167	0.241844	DS_vs_CTL	SoloTE-HAL1M8	0.00222535	TRUE	Interneuron_3	0.901785	1.42368
1.273e-07	0.537911	0.53	0.459	0.000137738	DS_vs_CTL	SoloTE-L1MA4A	5.79792e-06	TRUE	Interneuron_3	2.6354	4.78142
1.06778e-09	0.535885	0.593	0.568	1.15534e-06	DS_vs_CTL	SoloTE-L1MA2	1.06992e-07	TRUE	Interneuron_3	3.56858	6.48243
0.0639547	0.52452	0.056	0.036	1	DS_vs_CTL	SoloTE-MER74B	0.135768	FALSE	Interneuron_3	0.12656	0.194948
0.00183294	0.52329	0.139	0.091	1	DS_vs_CTL	SoloTE-MLT1J1	0.0116708	TRUE	Interneuron_3	0.332393	0.518483
7.321e-10	0.521525	0.766	0.718	7.92132e-07	DS_vs_CTL	SoloTE-L1PA16	9.16955e-08	TRUE	Interneuron_3	5.68962	10.1279
4.2072e-09	0.512148	0.635	0.574	4.55219e-06	DS_vs_CTL	SoloTE-L1MD1	3.51301e-07	TRUE	Interneuron_3	3.35563	5.72151
7.49356e-09	0.493145	0.647	0.608	8.10803e-06	DS_vs_CTL	SoloTE-L1MA4	5.36325e-07	TRUE	Interneuron_3	4.20235	7.51484
0.0660614	0.491126	0.102	0.072	1	DS_vs_CTL	SoloTE-MER21A	0.13848	FALSE	Interneuron_3	0.389737	0.475646
0.00683804	0.48421	0.212	0.157	1	DS_vs_CTL	SoloTE-MLT1H2	0.0295332	TRUE	Interneuron_3	0.618722	0.848114
0.0472577	0.47916	0.124	0.09	1	DS_vs_CTL	SoloTE-LTR16C	0.11168	FALSE	Interneuron_3	0.383912	0.628033
0.0693579	0.47367	0.089	0.062	1	DS_vs_CTL	SoloTE-MER34A	0.142411	FALSE	Interneuron_3	0.280805	0.345006
0.000732293	0.471171	0.313	0.239	0.792341	DS_vs_CTL	SoloTE-THE1B-int	0.0060144	TRUE	Interneuron_3	0.923728	1.46537
0.016222	0.470462	0.05	0.03	1	DS_vs_CTL	SoloTE-MER57E1	0.0522319	FALSE	Interneuron_3	0.0952738	0.121894
3.31879e-08	0.470125	0.594	0.552	3.59094e-05	DS_vs_CTL	SoloTE-L1MC2	2.07839e-06	TRUE	Interneuron_3	3.24506	4.94581
0.263043	0.466513	0.08	0.061	1	DS_vs_CTL	SoloTE-LTR37B	0.363043	FALSE	Interneuron_3	0.20655	0.241694
0.0474817	0.463088	0.057	0.038	1	DS_vs_CTL	SoloTE-LTR10C	0.111682	FALSE	Interneuron_3	0.196611	0.254102
0.132307	0.462982	0.077	0.055	1	DS_vs_CTL	SoloTE-Tigger5b	0.223185	FALSE	Interneuron_3	0.23901	0.331127
7.50407e-05	0.462762	0.432	0.367	0.081194	DS_vs_CTL	SoloTE-L1MA6	0.000916961	TRUE	Interneuron_3	1.75047	3.17345
0.105252	0.460383	0.112	0.084	1	DS_vs_CTL	SoloTE-Tigger18a	0.191056	FALSE	Interneuron_3	0.323825	0.442332
7.26359e-07	0.459527	0.631	0.548	0.000785921	DS_vs_CTL	SoloTE-L1PA13	2.14062e-05	TRUE	Interneuron_3	3.74156	5.91492
0.0209066	0.458034	0.05	0.031	1	DS_vs_CTL	SoloTE-MamGypLTR1a	0.0627199	FALSE	Interneuron_3	0.0634975	0.0854025
0.358217	0.455043	0.055	0.041	1	DS_vs_CTL	SoloTE-MER91A	0.454346	FALSE	Interneuron_3	0.192412	0.320452
0.0087866	0.45456	0.103	0.069	1	DS_vs_CTL	SoloTE-HERVIP10FH-int	0.0346621	TRUE	Interneuron_3	0.296342	0.350366
0.0437244	0.454087	0.14	0.103	1	DS_vs_CTL	SoloTE-L1MCb	0.106858	FALSE	Interneuron_3	0.425126	0.558034
0.269954	0.448374	0.065	0.048	1	DS_vs_CTL	SoloTE-LTR39	0.36852	FALSE	Interneuron_3	0.151068	0.182856
7.31064e-06	0.447479	0.909	0.908	0.00791011	DS_vs_CTL	SoloTE-L1PA7	0.000144791	TRUE	Interneuron_3	10.1212	17.6726
3.47075e-05	0.446902	0.812	0.796	0.0375535	DS_vs_CTL	SoloTE-L1MB3	0.00046993	TRUE	Interneuron_3	6.85782	11.7936
0.153586	0.446202	0.052	0.036	1	DS_vs_CTL	SoloTE-MER52A	0.248216	FALSE	Interneuron_3	0.136707	0.20353
0.0719244	0.444185	0.139	0.108	1	DS_vs_CTL	SoloTE-MER46C	0.145887	FALSE	Interneuron_3	0.380881	0.596985
0.00440911	0.443445	0.266	0.215	1	DS_vs_CTL	SoloTE-L1M6	0.0216565	TRUE	Interneuron_3	1.07546	1.69337
0.000226533	0.442069	0.119	0.075	0.245109	DS_vs_CTL	SoloTE-HERVH48-int	0.00222535	TRUE	Interneuron_3	0.2415	0.33252
3.13595e-11	0.439664	0.704	0.71	3.3931e-08	DS_vs_CTL	SoloTE-L1MA3	1.57111e-08	TRUE	Interneuron_3	4.77854	8.09659
2.17324e-07	0.438215	0.557	0.529	0.000235144	DS_vs_CTL	SoloTE-L1PA15	8.37532e-06	TRUE	Interneuron_3	3.18701	5.39745
0.205852	0.436811	0.101	0.078	1	DS_vs_CTL	SoloTE-MER119	0.301905	FALSE	Interneuron_3	0.307066	0.518802
0.0242025	0.435671	0.21	0.171	1	DS_vs_CTL	SoloTE-L1MCc	0.0695244	FALSE	Interneuron_3	0.705349	1.12822
0.00181214	0.433817	0.294	0.225	1	DS_vs_CTL	SoloTE-MSTD	0.0116708	TRUE	Interneuron_3	1.0024	1.59056
0.000178117	0.43213	0.355	0.268	0.192723	DS_vs_CTL	SoloTE-THE1C	0.00189865	TRUE	Interneuron_3	1.17959	1.8031
0.41561	0.422717	0.082	0.066	1	DS_vs_CTL	SoloTE-L1M2c	0.501736	FALSE	Interneuron_3	0.281509	0.402756
0.000957329	0.420075	0.179	0.123	1	DS_vs_CTL	SoloTE-ERVL-B4-int	0.00705327	TRUE	Interneuron_3	0.47454	0.64158
8.32946e-07	0.41944	0.724	0.662	0.000901248	DS_vs_CTL	SoloTE-L1MEf	2.31837e-05	TRUE	Interneuron_3	4.73008	6.94582
0.00655247	0.417443	0.056	0.032	1	DS_vs_CTL	SoloTE-L1PBb	0.0289705	TRUE	Interneuron_3	0.173152	0.201345
0.0582383	0.417283	0.135	0.101	1	DS_vs_CTL	SoloTE-MamRep434	0.127971	FALSE	Interneuron_3	0.361959	0.439307
0.00569486	0.416719	0.239	0.18	1	DS_vs_CTL	SoloTE-MER1B	0.0259732	TRUE	Interneuron_3	0.802481	1.1956
0.455657	0.41237	0.073	0.061	1	DS_vs_CTL	SoloTE-MER49	0.535497	FALSE	Interneuron_3	0.192686	0.218901
0.161221	0.412169	0.072	0.054	1	DS_vs_CTL	SoloTE-Charlie24	0.257235	FALSE	Interneuron_3	0.256412	0.335144
0.000779091	0.412168	0.393	0.319	0.842977	DS_vs_CTL	SoloTE-L1MD3	0.00629556	TRUE	Interneuron_3	1.59025	2.24883
0.410999	0.411934	0.086	0.072	1	DS_vs_CTL	SoloTE-THE1A-int	0.498573	FALSE	Interneuron_3	0.284282	0.478383
2.91084e-07	0.411595	0.66	0.642	0.000314953	DS_vs_CTL	SoloTE-L1PA8	9.72221e-06	TRUE	Interneuron_3	4.53595	7.5676
0.0257558	0.409479	0.073	0.049	1	DS_vs_CTL	SoloTE-LTR54	0.0724925	FALSE	Interneuron_3	0.257588	0.322426
0.102774	0.408928	0.125	0.095	1	DS_vs_CTL	SoloTE-MLT1H1	0.188608	FALSE	Interneuron_3	0.392763	0.511931
0.0422527	0.408671	0.161	0.122	1	DS_vs_CTL	SoloTE-Charlie4a	0.105651	FALSE	Interneuron_3	0.548378	0.74581
1.42073e-05	0.408237	0.871	0.84	0.0153723	DS_vs_CTL	SoloTE-HAL1	0.000229609	TRUE	Interneuron_3	8.03312	12.9386
0.166611	0.407585	0.13	0.103	1	DS_vs_CTL	SoloTE-Charlie18a	0.263683	FALSE	Interneuron_3	0.390705	0.608364
0.00198185	0.407307	0.078	0.048	1	DS_vs_CTL	SoloTE-HERVK-int	0.0119628	TRUE	Interneuron_3	0.358767	0.499296
0.0124584	0.407284	0.096	0.064	1	DS_vs_CTL	SoloTE-AmnSINE1	0.044267	TRUE	Interneuron_3	0.192393	0.316409
5.40068e-06	0.40715	0.553	0.512	0.00584354	DS_vs_CTL	SoloTE-L1PB4	0.000122988	TRUE	Interneuron_3	2.55988	3.90718
0.40381	0.405734	0.073	0.059	1	DS_vs_CTL	SoloTE-HSMAR1	0.493755	FALSE	Interneuron_3	0.244831	0.359604
8.52231e-06	0.405597	0.976	0.975	0.00922114	DS_vs_CTL	SoloTE-L2c	0.000158136	TRUE	Interneuron_3	21.3678	34.3931
0.00106363	0.4051	0.232	0.168	1	DS_vs_CTL	SoloTE-MER21B	0.00772286	TRUE	Interneuron_3	0.621872	0.961212
7.5141e-06	0.403663	0.588	0.509	0.00813026	DS_vs_CTL	SoloTE-L1ME3	0.000144791	TRUE	Interneuron_3	2.89402	4.39091
0.0951322	0.40098	0.062	0.042	1	DS_vs_CTL	SoloTE-Charlie7a	0.179178	FALSE	Interneuron_3	0.172388	0.254745
0.00194853	0.400303	0.85	0.842	1	DS_vs_CTL	SoloTE-L1PA5	0.0119628	TRUE	Interneuron_3	8.31705	13.6655
3.56434e-05	0.400158	0.763	0.726	0.0385662	DS_vs_CTL	SoloTE-L1PA6	0.00046993	TRUE	Interneuron_3	5.3977	9.12062
0.00224555	0.399646	0.334	0.268	1	DS_vs_CTL	SoloTE-L1MA10	0.0130816	TRUE	Interneuron_3	0.981322	1.69512
0.171827	0.399047	0.119	0.093	1	DS_vs_CTL	SoloTE-MER61-int	0.269017	FALSE	Interneuron_3	0.323605	0.397881
0.000520595	0.396196	0.525	0.494	0.563284	DS_vs_CTL	SoloTE-L1PA11	0.00465747	TRUE	Interneuron_3	3.03043	5.26764
0.00568197	0.395414	0.097	0.065	1	DS_vs_CTL	SoloTE-L1P4a	0.0259732	TRUE	Interneuron_3	0.331389	0.37551
0.188597	0.393625	0.061	0.043	1	DS_vs_CTL	SoloTE-L1M3de	0.287195	FALSE	Interneuron_3	0.142332	0.209755
0.0455304	0.392185	0.128	0.094	1	DS_vs_CTL	SoloTE-Charlie29a	0.110197	FALSE	Interneuron_3	0.32753	0.439973
2.00863e-05	0.391828	0.937	0.935	0.0217334	DS_vs_CTL	SoloTE-L2	0.000295978	TRUE	Interneuron_3	12.2359	20.428
0.119771	0.391528	0.159	0.126	1	DS_vs_CTL	SoloTE-MamTip2	0.207631	FALSE	Interneuron_3	0.422191	0.533931
2.62218e-07	0.390845	0.697	0.673	0.00028372	DS_vs_CTL	SoloTE-L1MA9	9.38366e-06	TRUE	Interneuron_3	4.53445	7.48945
0.00159948	0.389121	0.783	0.76	1	DS_vs_CTL	SoloTE-L1MC1	0.0106845	TRUE	Interneuron_3	6.15815	10.972
0.189493	0.386967	0.103	0.079	1	DS_vs_CTL	SoloTE-Charlie15a	0.287685	FALSE	Interneuron_3	0.2954	0.422985
0.149236	0.386694	0.116	0.089	1	DS_vs_CTL	SoloTE-Arthur1	0.241965	FALSE	Interneuron_3	0.283925	0.370184
0.0848875	0.386476	0.124	0.094	1	DS_vs_CTL	SoloTE-MER8	0.165451	FALSE	Interneuron_3	0.404946	0.532465
8.74499e-05	0.38568	0.519	0.444	0.0946208	DS_vs_CTL	SoloTE-MER20	0.000995737	TRUE	Interneuron_3	2.66442	3.96409
0.000152689	0.385505	0.457	0.413	0.16521	DS_vs_CTL	SoloTE-L1PA14	0.00169994	TRUE	Interneuron_3	1.86671	3.1732
1.09093e-05	0.382416	0.944	0.929	0.0118039	DS_vs_CTL	SoloTE-L1ME1	0.000195199	TRUE	Interneuron_3	11.7908	18.7876
0.0229394	0.380508	0.287	0.235	1	DS_vs_CTL	SoloTE-L3b	0.0672084	FALSE	Interneuron_3	1.1513	1.77614
0.0361113	0.380396	0.225	0.179	1	DS_vs_CTL	SoloTE-L1ME5	0.0937396	FALSE	Interneuron_3	0.731216	1.28463
2.59073e-06	0.380077	0.718	0.672	0.00280317	DS_vs_CTL	SoloTE-L1ME2	6.48979e-05	TRUE	Interneuron_3	4.39628	7.13742
0.0464561	0.378985	0.092	0.066	1	DS_vs_CTL	SoloTE-L1MDb	0.110831	FALSE	Interneuron_3	0.255358	0.373532
9.28283e-08	0.378203	0.944	0.931	0.00010044	DS_vs_CTL	SoloTE-L2b	4.6507e-06	TRUE	Interneuron_3	13.1462	20.7618
8.385e-05	0.377707	0.051	0.027	0.0907258	DS_vs_CTL	SoloTE-LTR48	0.000986177	TRUE	Interneuron_3	0.118523	0.172519
0.000207392	0.374155	0.527	0.453	0.224398	DS_vs_CTL	SoloTE-L1PA17	0.00212048	TRUE	Interneuron_3	2.46421	3.77998
0.00312732	0.373192	0.404	0.359	1	DS_vs_CTL	SoloTE-L1ME3F	0.0163207	TRUE	Interneuron_3	1.67943	2.91552
0.000792434	0.372677	0.436	0.405	0.857413	DS_vs_CTL	SoloTE-L1MB1	0.00630174	TRUE	Interneuron_3	1.99731	3.43557
0.0129777	0.370624	0.266	0.217	1	DS_vs_CTL	SoloTE-MER103C	0.04502	TRUE	Interneuron_3	0.857053	1.31118
0.0646155	0.369584	0.073	0.053	1	DS_vs_CTL	SoloTE-Penelope1-Vert	0.136214	FALSE	Interneuron_3	0.168973	0.223293
2.578e-05	0.367998	0.816	0.788	0.0278939	DS_vs_CTL	SoloTE-L3	0.000358771	TRUE	Interneuron_3	6.94463	10.7018
0.216939	0.364752	0.13	0.107	1	DS_vs_CTL	SoloTE-LTR8	0.313218	FALSE	Interneuron_3	0.389586	0.480632
0.090722	0.364668	0.062	0.043	1	DS_vs_CTL	SoloTE-MSTD-int	0.17282	FALSE	Interneuron_3	0.153046	0.218853
0.0018403	0.364167	0.483	0.411	1	DS_vs_CTL	SoloTE-MLT1B	0.0116708	TRUE	Interneuron_3	2.14598	3.08708
4.59168e-07	0.364046	0.894	0.848	0.00049682	DS_vs_CTL	SoloTE-L1MEc	1.43777e-05	TRUE	Interneuron_3	8.32909	12.9172
0.0327636	0.360294	0.298	0.249	1	DS_vs_CTL	SoloTE-L4-A-Mam	0.0872067	FALSE	Interneuron_3	0.934108	1.36862
0.00730306	0.359376	0.383	0.331	1	DS_vs_CTL	SoloTE-L1MEi	0.0303107	TRUE	Interneuron_3	1.44709	2.10421
0.00378087	0.359324	0.411	0.35	1	DS_vs_CTL	SoloTE-MER5A1	0.0191335	TRUE	Interneuron_3	1.73886	2.56971
0.00128567	0.356703	0.379	0.35	1	DS_vs_CTL	SoloTE-L1PA8A	0.00882354	TRUE	Interneuron_3	1.31199	2.36171
0.0129948	0.356341	0.21	0.159	1	DS_vs_CTL	SoloTE-L1MEh	0.04502	TRUE	Interneuron_3	0.710334	0.987472
0.000192877	0.356203	0.563	0.505	0.208692	DS_vs_CTL	SoloTE-L1MA7	0.00201315	TRUE	Interneuron_3	2.58821	4.09368
1.25346e-05	0.356131	0.609	0.582	0.0135625	DS_vs_CTL	SoloTE-L1MC3	0.000209328	TRUE	Interneuron_3	3.5819	5.6904
0.398057	0.353939	0.068	0.055	1	DS_vs_CTL	SoloTE-L1M3a	0.488791	FALSE	Interneuron_3	0.256697	0.338376
0.037339	0.353103	0.061	0.042	1	DS_vs_CTL	SoloTE-MER6A	0.096427	FALSE	Interneuron_3	0.175851	0.304564
2.07908e-06	0.352306	0.714	0.693	0.00224957	DS_vs_CTL	SoloTE-L1MD2	5.48222e-05	TRUE	Interneuron_3	4.83091	7.06959
0.339294	0.34591	0.056	0.043	1	DS_vs_CTL	SoloTE-HERVS71-int	0.435862	FALSE	Interneuron_3	0.234036	0.285798
0.0280132	0.341123	0.107	0.077	1	DS_vs_CTL	SoloTE-MLT1A0-int	0.0766918	FALSE	Interneuron_3	0.265513	0.417509
0.250786	0.340556	0.164	0.137	1	DS_vs_CTL	SoloTE-MER4D1	0.353926	FALSE	Interneuron_3	0.529581	0.600199
0.0569307	0.339872	0.164	0.128	1	DS_vs_CTL	SoloTE-MLT2B4	0.125649	FALSE	Interneuron_3	0.640626	0.834738
0.000854669	0.338604	0.559	0.506	0.924752	DS_vs_CTL	SoloTE-L1ME2z	0.00648772	TRUE	Interneuron_3	2.72539	3.99764
0.0292328	0.337164	0.323	0.269	1	DS_vs_CTL	SoloTE-MER21C	0.0791656	FALSE	Interneuron_3	1.15627	1.6344
0.0155421	0.335946	0.337	0.289	1	DS_vs_CTL	SoloTE-MLT1L	0.0507514	FALSE	Interneuron_3	1.38147	1.86136
0.0211597	0.334222	0.365	0.31	1	DS_vs_CTL	SoloTE-THE1D	0.0631012	FALSE	Interneuron_3	1.75155	2.6216
0.132084	0.32682	0.057	0.041	1	DS_vs_CTL	SoloTE-HUERS-P3b-int	0.223185	FALSE	Interneuron_3	0.0995962	0.25232
0.445829	0.326332	0.091	0.076	1	DS_vs_CTL	SoloTE-MLT1G	0.526794	FALSE	Interneuron_3	0.323835	0.474366
0.00111326	0.323171	0.911	0.879	1	DS_vs_CTL	SoloTE-L1MB7	0.00785557	TRUE	Interneuron_3	10.5498	16.4218
0.0619525	0.322954	0.245	0.2	1	DS_vs_CTL	SoloTE-MLT1G3	0.132077	FALSE	Interneuron_3	0.749706	0.876738
0.0892975	0.322162	0.066	0.049	1	DS_vs_CTL	SoloTE-Tigger12	0.170756	FALSE	Interneuron_3	0.153177	0.209788
0.111143	0.321658	0.152	0.119	1	DS_vs_CTL	SoloTE-L1M2a	0.198158	FALSE	Interneuron_3	0.477723	0.631257
0.699455	0.320884	0.057	0.049	1	DS_vs_CTL	SoloTE-HERVL40-int	0.750379	FALSE	Interneuron_3	0.153594	0.227823
0.000536302	0.320336	0.451	0.364	0.580279	DS_vs_CTL	SoloTE-AluYk2	0.00471381	TRUE	Interneuron_3	1.71654	2.15274
0.0541479	0.318381	0.335	0.285	1	DS_vs_CTL	SoloTE-L1MA5A	0.120036	FALSE	Interneuron_3	1.23145	2.11585
0.0520412	0.314909	0.304	0.259	1	DS_vs_CTL	SoloTE-Charlie4z	0.117976	FALSE	Interneuron_3	1.12456	1.42487
0.0192283	0.313395	0.354	0.309	1	DS_vs_CTL	SoloTE-L1P4	0.0598348	FALSE	Interneuron_3	1.31775	1.7105
0.0601687	0.311411	0.094	0.068	1	DS_vs_CTL	SoloTE-MER11A	0.129625	FALSE	Interneuron_3	0.226106	0.316756
0.10779	0.308325	0.258	0.218	1	DS_vs_CTL	SoloTE-MER112	0.194956	FALSE	Interneuron_3	0.953395	1.28469
0.0108446	0.308294	0.077	0.053	1	DS_vs_CTL	SoloTE-MER57A1	0.0399496	TRUE	Interneuron_3	0.191186	0.249068
0.136244	0.30481	0.222	0.186	1	DS_vs_CTL	SoloTE-L1M4a2	0.226546	FALSE	Interneuron_3	0.668815	1.24614
0.0499105	0.303536	0.065	0.046	1	DS_vs_CTL	SoloTE-HUERS-P3-int	0.115231	FALSE	Interneuron_3	0.16603	0.177531
0.180184	0.303212	0.191	0.16	1	DS_vs_CTL	SoloTE-MER47A	0.27776	FALSE	Interneuron_3	0.41008	0.629941
1.6224e-05	0.30293	0.999	0.992	0.0175543	DS_vs_CTL	SoloTE-L2a	0.000254006	TRUE	Interneuron_3	33.4097	52.634
6.16085e-06	0.302096	0.594	0.603	0.00666604	DS_vs_CTL	SoloTE-L1MC4a	0.000134199	TRUE	Interneuron_3	3.45157	5.71215
0.000349103	0.296373	0.878	0.885	0.377729	DS_vs_CTL	SoloTE-L1MC4	0.0032389	TRUE	Interneuron_3	9.46729	14.4133
0.541579	0.295715	0.068	0.056	1	DS_vs_CTL	SoloTE-MER9a3	0.609733	FALSE	Interneuron_3	0.188412	0.189048
0.074268	0.295097	0.275	0.23	1	DS_vs_CTL	SoloTE-HAL1b	0.150033	FALSE	Interneuron_3	0.932221	1.37387
0.135236	0.294565	0.224	0.188	1	DS_vs_CTL	SoloTE-L4-C-Mam	0.225844	FALSE	Interneuron_3	0.805203	1.09771
1.2399e-05	0.29422	0.67	0.679	0.0134158	DS_vs_CTL	SoloTE-L1MB4	0.000209328	TRUE	Interneuron_3	4.26255	6.64909
0.00276858	0.292941	0.601	0.559	1	DS_vs_CTL	SoloTE-L1ME3Cz	0.0147559	TRUE	Interneuron_3	3.07265	4.5478
0.082247	0.292408	0.143	0.112	1	DS_vs_CTL	SoloTE-MER44A	0.162227	FALSE	Interneuron_3	0.495864	0.688247
0.0126132	0.292005	0.448	0.402	1	DS_vs_CTL	SoloTE-MER2	0.0445014	TRUE	Interneuron_3	2.10353	2.97195
0.0765745	0.289339	0.226	0.185	1	DS_vs_CTL	SoloTE-Tigger2a	0.153455	FALSE	Interneuron_3	0.848608	1.10533
3.40996e-06	0.288558	0.802	0.756	0.00368958	DS_vs_CTL	SoloTE-L1MEg	8.13519e-05	TRUE	Interneuron_3	5.84549	8.39954
0.000358133	0.288305	0.983	0.977	0.3875	DS_vs_CTL	SoloTE-MIR	0.00326227	TRUE	Interneuron_3	20.7015	29.6986
0.00028158	0.28738	0.699	0.676	0.30467	DS_vs_CTL	SoloTE-L1ME3A	0.00271292	TRUE	Interneuron_3	4.42598	6.7247
0.242049	0.28676	0.086	0.067	1	DS_vs_CTL	SoloTE-Charlie25	0.343532	FALSE	Interneuron_3	0.304057	0.392374
0.029645	0.284592	0.227	0.182	1	DS_vs_CTL	SoloTE-L1M7	0.0798504	FALSE	Interneuron_3	0.8512	1.28121
0.0196119	0.284403	0.082	0.058	1	DS_vs_CTL	SoloTE-LTR37A	0.0606515	FALSE	Interneuron_3	0.211001	0.282867
0.166841	0.282401	0.179	0.147	1	DS_vs_CTL	SoloTE-Charlie1b	0.263683	FALSE	Interneuron_3	0.80914	1.14262
0.266354	0.281964	0.176	0.152	1	DS_vs_CTL	SoloTE-MER102a	0.366602	FALSE	Interneuron_3	0.512208	0.67635
0.0282306	0.281051	0.25	0.2	1	DS_vs_CTL	SoloTE-MLT1F	0.076867	FALSE	Interneuron_3	0.846538	1.04629
0.00350991	0.279987	0.569	0.512	1	DS_vs_CTL	SoloTE-MLT1C	0.0181285	TRUE	Interneuron_3	2.75013	3.86929
0.0057027	0.278741	0.278	0.218	1	DS_vs_CTL	SoloTE-L1PA12	0.0259732	TRUE	Interneuron_3	1.02975	1.2646
0.112894	0.278595	0.179	0.147	1	DS_vs_CTL	SoloTE-THE1A	0.200567	FALSE	Interneuron_3	0.555047	0.84153
0.0101107	0.277243	0.135	0.102	1	DS_vs_CTL	SoloTE-MER44C	0.0380862	TRUE	Interneuron_3	0.294822	0.423081
0.369856	0.276496	0.13	0.113	1	DS_vs_CTL	SoloTE-MER102c	0.464405	FALSE	Interneuron_3	0.450741	0.661238
0.0585245	0.274972	0.334	0.286	1	DS_vs_CTL	SoloTE-MER30	0.128038	FALSE	Interneuron_3	1.56851	1.97559
0.167544	0.274245	0.226	0.192	1	DS_vs_CTL	SoloTE-Tigger3a	0.26396	FALSE	Interneuron_3	0.850236	1.36352
0.0811024	0.272321	0.304	0.258	1	DS_vs_CTL	SoloTE-MLT1H	0.160602	FALSE	Interneuron_3	0.980501	1.26372
0.00285949	0.27159	0.816	0.775	1	DS_vs_CTL	SoloTE-L1ME4a	0.0150801	TRUE	Interneuron_3	7.29982	10.4188
0.00126064	0.271553	0.83	0.788	1	DS_vs_CTL	SoloTE-L1MB8	0.00877194	TRUE	Interneuron_3	7.0022	10.2539
0.00538773	0.270145	0.611	0.571	1	DS_vs_CTL	SoloTE-L1MA8	0.0254646	TRUE	Interneuron_3	3.4235	5.23831
0.00666025	0.269656	0.15	0.112	1	DS_vs_CTL	SoloTE-MER41B	0.0290155	TRUE	Interneuron_3	0.572589	0.705249
0.00725364	0.268685	0.066	0.044	1	DS_vs_CTL	SoloTE-MLT1J-int	0.0303107	TRUE	Interneuron_3	0.182368	0.251078
0.00197361	0.265803	0.775	0.76	1	DS_vs_CTL	SoloTE-L1PB1	0.0119628	TRUE	Interneuron_3	6.4654	9.56617
0.0145196	0.264989	0.682	0.645	1	DS_vs_CTL	SoloTE-L1ME3G	0.048821	TRUE	Interneuron_3	4.11562	6.00776
0.11627	0.264838	0.316	0.275	1	DS_vs_CTL	SoloTE-L1ME3E	0.20439	FALSE	Interneuron_3	1.26895	1.95196
0.024944	0.264606	0.415	0.383	1	DS_vs_CTL	SoloTE-HAL1ME	0.0706043	FALSE	Interneuron_3	1.90599	2.92631
0.0709321	0.264568	0.204	0.166	1	DS_vs_CTL	SoloTE-MADE1	0.144573	FALSE	Interneuron_3	0.7213	0.905948
0.00252915	0.264267	0.617	0.596	1	DS_vs_CTL	SoloTE-L1M2	0.0136248	TRUE	Interneuron_3	3.92321	5.39488
0.000828104	0.263418	0.656	0.597	0.896009	DS_vs_CTL	SoloTE-L1PREC2	0.00642509	TRUE	Interneuron_3	3.67077	5.50929
0.147569	0.263284	0.256	0.221	1	DS_vs_CTL	SoloTE-MER20B	0.24082	FALSE	Interneuron_3	0.851428	1.18256
0.0618484	0.262184	0.06	0.044	1	DS_vs_CTL	SoloTE-MER131	0.132077	FALSE	Interneuron_3	0.159704	0.228206
0.158856	0.260854	0.149	0.12	1	DS_vs_CTL	SoloTE-MER81	0.254271	FALSE	Interneuron_3	0.677318	0.739243
0.000925529	0.260451	0.99	0.981	1	DS_vs_CTL	SoloTE-MIRb	0.00692074	TRUE	Interneuron_3	24.669	35.1648
0.109642	0.260358	0.298	0.257	1	DS_vs_CTL	SoloTE-L1P3	0.196883	FALSE	Interneuron_3	1.18494	1.70187
0.490122	0.259706	0.113	0.097	1	DS_vs_CTL	SoloTE-HERV35I-int	0.565815	FALSE	Interneuron_3	0.321968	0.355005
0.280799	0.257851	0.092	0.073	1	DS_vs_CTL	SoloTE-Zaphod	0.377159	FALSE	Interneuron_3	0.285329	0.342767
0.0087781	0.256969	0.602	0.564	1	DS_vs_CTL	SoloTE-L1MCa	0.0346621	TRUE	Interneuron_3	3.33096	4.72708
0.00239317	0.254341	0.47	0.444	1	DS_vs_CTL	SoloTE-MLT1A0	0.013322	TRUE	Interneuron_3	2.26934	3.13748
7.42601e-05	0.251699	0.799	0.795	0.0803495	DS_vs_CTL	SoloTE-L1MEd	0.000916961	TRUE	Interneuron_3	6.59295	9.71909
0.353526	0.251111	0.179	0.155	1	DS_vs_CTL	SoloTE-Charlie8	0.449534	FALSE	Interneuron_3	0.724304	0.930808
0.0140769	0.249937	0.44	0.374	1	DS_vs_CTL	SoloTE-MLT1J	0.0476523	FALSE	Interneuron_3	1.78782	2.48318
0.0267561	0.24924	0.58	0.537	1	DS_vs_CTL	SoloTE-THE1B	0.0745447	FALSE	Interneuron_3	3.99338	5.15998
0.00439771	0.247603	0.684	0.642	1	DS_vs_CTL	SoloTE-L1M1	0.0216565	FALSE	Interneuron_3	4.49795	6.0116
0.0272648	0.247195	0.127	0.098	1	DS_vs_CTL	SoloTE-HERVL-int	0.0750532	FALSE	Interneuron_3	0.355042	0.560046
0.00906374	0.247087	0.925	0.896	1	DS_vs_CTL	SoloTE-MIRc	0.0349303	FALSE	Interneuron_3	10.9274	15.4738
0.00923736	0.243507	0.143	0.109	1	DS_vs_CTL	SoloTE-ERV3-16A3-I-int	0.0353276	FALSE	Interneuron_3	0.472856	0.693246
0.0023456	0.243167	0.053	0.035	1	DS_vs_CTL	SoloTE-MER39B	0.013322	FALSE	Interneuron_3	0.154187	0.20377
0.00901011	0.243137	0.784	0.758	1	DS_vs_CTL	SoloTE-L1MC5	0.0349303	FALSE	Interneuron_3	6.4992	9.17715
0.269061	0.242992	0.056	0.043	1	DS_vs_CTL	SoloTE-Tigger17c	0.368305	FALSE	Interneuron_3	0.108859	0.146711
0.00232388	0.240963	0.516	0.498	1	DS_vs_CTL	SoloTE-MER5B	0.013322	FALSE	Interneuron_3	2.68071	3.76484
0.00593494	0.238051	0.276	0.22	1	DS_vs_CTL	SoloTE-L1M8	0.0265483	FALSE	Interneuron_3	0.790072	1.18881
0.146157	0.237113	0.08	0.062	1	DS_vs_CTL	SoloTE-MER115	0.239296	FALSE	Interneuron_3	0.178161	0.285257
0.0776156	0.236268	0.355	0.315	1	DS_vs_CTL	SoloTE-MLT1K	0.154307	FALSE	Interneuron_3	1.64315	2.38836
0.481221	0.233585	0.057	0.047	1	DS_vs_CTL	SoloTE-MamRep4096	0.560679	FALSE	Interneuron_3	0.163392	0.186037
0.351476	0.232942	0.138	0.117	1	DS_vs_CTL	SoloTE-MER41-int	0.448065	FALSE	Interneuron_3	0.499074	0.703045
0.313003	0.231624	0.098	0.08	1	DS_vs_CTL	SoloTE-LTR78B	0.408371	FALSE	Interneuron_3	0.27988	0.398482
0.0852025	0.231339	0.388	0.354	1	DS_vs_CTL	SoloTE-L1ME3D	0.165451	FALSE	Interneuron_3	1.53217	2.15001
0.504124	0.229671	0.062	0.05	1	DS_vs_CTL	SoloTE-MamRep1151	0.577743	FALSE	Interneuron_3	0.180515	0.29402
0.206091	0.229157	0.265	0.241	1	DS_vs_CTL	SoloTE-Charlie2b	0.301905	FALSE	Interneuron_3	0.963731	1.1796
0.0267825	0.229148	0.841	0.812	1	DS_vs_CTL	SoloTE-L1MC5a	0.0745447	FALSE	Interneuron_3	7.00684	10.026
0.0204589	0.228384	0.145	0.112	1	DS_vs_CTL	SoloTE-MER74A	0.0621208	FALSE	Interneuron_3	0.464549	0.683625
0.004734	0.227804	0.681	0.656	1	DS_vs_CTL	SoloTE-MER5A	0.0230266	FALSE	Interneuron_3	4.21348	5.77595
0.0423868	0.227024	0.073	0.055	1	DS_vs_CTL	SoloTE-Charlie23a	0.105651	FALSE	Interneuron_3	0.196796	0.270456
0.0215367	0.225508	0.104	0.078	1	DS_vs_CTL	SoloTE-MER44B	0.0638456	FALSE	Interneuron_3	0.272322	0.480506
0.343286	0.225248	0.163	0.15	1	DS_vs_CTL	SoloTE-MLT1M	0.439862	FALSE	Interneuron_3	0.423209	0.714126
0.00213569	0.224848	0.737	0.688	1	DS_vs_CTL	SoloTE-L1MDa	0.012588	FALSE	Interneuron_3	4.66717	5.46021
0.752628	0.224518	0.061	0.054	1	DS_vs_CTL	SoloTE-LOR1-int	0.801671	FALSE	Interneuron_3	0.218008	0.356546
0.444245	0.221125	0.098	0.082	1	DS_vs_CTL	SoloTE-LTR41	0.526694	FALSE	Interneuron_3	0.254332	0.318356
0.129567	0.217821	0.416	0.383	1	DS_vs_CTL	SoloTE-L1ME4c	0.220793	FALSE	Interneuron_3	1.92515	2.83934
0.133553	0.216481	0.18	0.153	1	DS_vs_CTL	SoloTE-Tigger4b	0.22453	FALSE	Interneuron_3	0.647477	0.975577
0.306974	0.216454	0.191	0.165	1	DS_vs_CTL	SoloTE-MLT1E2	0.403887	FALSE	Interneuron_3	0.683648	0.987433
0.10409	0.215764	0.147	0.12	1	DS_vs_CTL	SoloTE-MamRep605	0.189632	FALSE	Interneuron_3	0.449045	0.703375
0.505093	0.214796	0.12	0.104	1	DS_vs_CTL	SoloTE-MLT1F1	0.577743	FALSE	Interneuron_3	0.362985	0.471122
0.359211	0.211218	0.142	0.12	1	DS_vs_CTL	SoloTE-MLT1O	0.454457	FALSE	Interneuron_3	0.425957	0.633927
0.182808	0.211083	0.088	0.071	1	DS_vs_CTL	SoloTE-Tigger6a	0.280941	FALSE	Interneuron_3	0.214037	0.324209
0.311742	0.210471	0.246	0.218	1	DS_vs_CTL	SoloTE-L1ME3C	0.408124	FALSE	Interneuron_3	0.846141	1.26554
0.0121285	0.20721	0.374	0.313	1	DS_vs_CTL	SoloTE-Tigger2	0.043557	FALSE	Interneuron_3	1.41416	1.95067
0.0121716	0.205787	0.827	0.84	1	DS_vs_CTL	SoloTE-MIR3	0.043557	FALSE	Interneuron_3	7.97055	11.2343
0.0245016	0.204027	0.096	0.073	1	DS_vs_CTL	SoloTE-MER117	0.069746	FALSE	Interneuron_3	0.369235	0.562102
0.00898763	0.203249	0.96	0.95	1	DS_vs_CTL	SoloTE-L1M5	0.0349303	FALSE	Interneuron_3	14.9359	20.0054
0.0396091	0.202294	0.073	0.055	1	DS_vs_CTL	SoloTE-L1PBa1	0.100732	FALSE	Interneuron_3	0.216996	0.293773
0.0119299	0.199382	0.892	0.858	1	DS_vs_CTL	SoloTE-L1M4	0.0433106	FALSE	Interneuron_3	9.19328	12.1381
0.805681	0.195584	0.06	0.054	1	DS_vs_CTL	SoloTE-MamGypLTR3	0.839182	FALSE	Interneuron_3	0.140174	0.149994
0.070988	0.195289	0.296	0.251	1	DS_vs_CTL	SoloTE-L1M4a1	0.144573	FALSE	Interneuron_3	1.17535	1.62632
0.00563915	0.195055	0.647	0.63	1	DS_vs_CTL	SoloTE-L1ME3B	0.0259732	FALSE	Interneuron_3	3.24343	4.65334
0.0131595	0.194427	0.073	0.053	1	DS_vs_CTL	SoloTE-MER90a	0.0451569	FALSE	Interneuron_3	0.220353	0.279976
0.212956	0.193777	0.903	0.901	1	DS_vs_CTL	SoloTE-L1PA4	0.30925	FALSE	Interneuron_3	11.1711	16.2987
0.244351	0.191691	0.234	0.203	1	DS_vs_CTL	SoloTE-Tigger17a	0.345819	FALSE	Interneuron_3	0.802771	1.06572
0.110712	0.191062	0.052	0.041	1	DS_vs_CTL	SoloTE-Tigger16b	0.198095	FALSE	Interneuron_3	0.172434	0.342406
0.366473	0.1908	0.086	0.072	1	DS_vs_CTL	SoloTE-Looper	0.461315	FALSE	Interneuron_3	0.293457	0.369413
0.66661	0.189668	0.127	0.113	1	DS_vs_CTL	SoloTE-Tigger9b	0.722883	FALSE	Interneuron_3	0.363572	0.434086
0.0198698	0.188305	0.519	0.455	1	DS_vs_CTL	SoloTE-L1MC	0.0610722	FALSE	Interneuron_3	2.32513	3.11464
0.609927	0.185345	0.194	0.182	1	DS_vs_CTL	SoloTE-Tigger15a	0.67159	FALSE	Interneuron_3	0.713755	1.13713
0.456401	0.18512	0.08	0.067	1	DS_vs_CTL	SoloTE-LTR46-int	0.535497	FALSE	Interneuron_3	0.245677	0.293236
0.0025048	0.184782	0.122	0.092	1	DS_vs_CTL	SoloTE-MER53	0.0136248	FALSE	Interneuron_3	0.431773	0.601794
0.0533136	0.182793	0.357	0.308	1	DS_vs_CTL	SoloTE-L1PB2	0.118712	FALSE	Interneuron_3	1.41635	1.8564
0.00389785	0.181987	0.653	0.661	1	DS_vs_CTL	SoloTE-L1PA10	0.0195283	FALSE	Interneuron_3	4.3745	6.41766
0.00196445	0.181211	0.132	0.101	1	DS_vs_CTL	SoloTE-MER94	0.0119628	FALSE	Interneuron_3	0.416766	0.64379
0.349826	0.179957	0.062	0.052	1	DS_vs_CTL	SoloTE-LTR12F	0.447099	FALSE	Interneuron_3	0.182114	0.226478
0.0430443	0.178499	0.108	0.084	1	DS_vs_CTL	SoloTE-L1M3c	0.105818	FALSE	Interneuron_3	0.377382	0.456593
0.304683	0.177037	0.071	0.059	1	DS_vs_CTL	SoloTE-MER96B	0.403754	FALSE	Interneuron_3	0.227106	0.293227
0.252117	0.176836	0.268	0.236	1	DS_vs_CTL	SoloTE-MLT1A1	0.354805	FALSE	Interneuron_3	1.04259	1.25546
0.274426	0.176382	0.052	0.042	1	DS_vs_CTL	SoloTE-Charlie9	0.371588	FALSE	Interneuron_3	0.173998	0.229336
0.131215	0.17625	0.48	0.437	1	DS_vs_CTL	SoloTE-L1M3	0.222844	FALSE	Interneuron_3	2.28777	3.06171
0.555473	0.174754	0.057	0.049	1	DS_vs_CTL	SoloTE-LTR33A-	0.621836	FALSE	Interneuron_3	0.184341	0.234935
0.0162638	0.174102	0.761	0.773	1	DS_vs_CTL	SoloTE-L1ME4b	0.0522319	FALSE	Interneuron_3	6.10966	8.50414
0.215322	0.173545	0.124	0.103	1	DS_vs_CTL	SoloTE-Tigger19a	0.311782	FALSE	Interneuron_3	0.446773	0.699575
0.555701	0.173317	0.157	0.139	1	DS_vs_CTL	SoloTE-MER65-int	0.621836	FALSE	Interneuron_3	0.541008	0.613814
0.0103521	0.171484	0.778	0.783	1	DS_vs_CTL	SoloTE-Tigger1	0.0387043	FALSE	Interneuron_3	6.52378	8.70001
0.192469	0.171392	0.191	0.162	1	DS_vs_CTL	SoloTE-AluYb9	0.289298	FALSE	Interneuron_3	0.96892	0.981621
0.283042	0.171345	0.081	0.067	1	DS_vs_CTL	SoloTE-HERV17-int	0.379155	FALSE	Interneuron_3	0.243114	0.375493
0.573456	0.170805	0.108	0.095	1	DS_vs_CTL	SoloTE-OldhAT1	0.637032	FALSE	Interneuron_3	0.357101	0.516156
0.114187	0.170078	0.215	0.182	1	DS_vs_CTL	SoloTE-AluYi6	0.202148	FALSE	Interneuron_3	0.742693	0.727157
0.00781966	0.169884	0.688	0.694	1	DS_vs_CTL	SoloTE-MLT1D	0.0318508	FALSE	Interneuron_3	3.46541	4.5309
0.255057	0.168806	0.411	0.38	1	DS_vs_CTL	SoloTE-MER58B	0.35706	FALSE	Interneuron_3	1.6631	2.20742
0.0689709	0.167765	0.14	0.113	1	DS_vs_CTL	SoloTE-MLT2D	0.142411	FALSE	Interneuron_3	0.417431	0.53641
0.691473	0.166872	0.061	0.06	1	DS_vs_CTL	SoloTE-Kanga11a	0.743408	FALSE	Interneuron_3	0.150663	0.193887
0.490147	0.166643	0.163	0.144	1	DS_vs_CTL	SoloTE-Tigger7	0.565815	FALSE	Interneuron_3	0.596324	0.803797
0.0222558	0.163529	0.241	0.199	1	DS_vs_CTL	SoloTE-Charlie7	0.0655891	FALSE	Interneuron_3	0.990411	1.33874
0.805545	0.162905	0.072	0.065	1	DS_vs_CTL	SoloTE-MER45B	0.839182	FALSE	Interneuron_3	0.267755	0.346336
0.827119	0.161216	0.058	0.052	1	DS_vs_CTL	SoloTE-Tigger14a	0.856171	FALSE	Interneuron_3	0.134869	0.185495
0.0330724	0.16022	0.745	0.726	1	DS_vs_CTL	SoloTE-FLAM-A	0.0872067	FALSE	Interneuron_3	5.46301	6.03799
0.0676618	0.160047	0.265	0.228	1	DS_vs_CTL	SoloTE-Plat-L3	0.140658	FALSE	Interneuron_3	0.505001	0.65149
0.33418	0.159005	0.071	0.059	1	DS_vs_CTL	SoloTE-MER4D	0.431506	FALSE	Interneuron_3	0.211893	0.239876
0.172955	0.158259	0.082	0.067	1	DS_vs_CTL	SoloTE-L1MEg1	0.269939	FALSE	Interneuron_3	0.272554	0.395289
0.0185052	0.157743	0.061	0.045	1	DS_vs_CTL	SoloTE-MER91B	0.058309	FALSE	Interneuron_3	0.108569	0.174371
0.17414	0.154421	0.639	0.607	1	DS_vs_CTL	SoloTE-Tigger3b	0.270944	FALSE	Interneuron_3	3.18241	3.91064
0.307148	0.151266	0.057	0.046	1	DS_vs_CTL	SoloTE-HUERS-P1-int	0.403887	FALSE	Interneuron_3	0.114853	0.137755
0.0518679	0.151068	0.113	0.09	1	DS_vs_CTL	SoloTE-LTR78	0.117976	FALSE	Interneuron_3	0.302114	0.49403
0.230688	0.1506	0.078	0.064	1	DS_vs_CTL	SoloTE-MER67C	0.33116	FALSE	Interneuron_3	0.231153	0.272678
0.70822	0.149068	0.256	0.246	1	DS_vs_CTL	SoloTE-MLT1I	0.758158	FALSE	Interneuron_3	1.05931	1.53366
0.024285	0.146906	0.467	0.412	1	DS_vs_CTL	SoloTE-MER3	0.0695244	FALSE	Interneuron_3	2.03512	2.62326
0.0971712	0.146036	0.102	0.084	1	DS_vs_CTL	SoloTE-MamRep38	0.180657	FALSE	Interneuron_3	0.313631	0.40109
0.485957	0.144953	0.393	0.367	1	DS_vs_CTL	SoloTE-L1M4b	0.564883	FALSE	Interneuron_3	1.71944	2.29262
0.0749883	0.144645	0.634	0.583	1	DS_vs_CTL	SoloTE-L1MD	0.15088	FALSE	Interneuron_3	3.33213	4.14098
0.383976	0.143781	0.154	0.136	1	DS_vs_CTL	SoloTE-MER77B	0.477349	FALSE	Interneuron_3	0.381145	0.476847
0.608323	0.142978	0.068	0.061	1	DS_vs_CTL	SoloTE-MER65A	0.671299	FALSE	Interneuron_3	0.255766	0.306735
0.471789	0.14168	0.476	0.449	1	DS_vs_CTL	SoloTE-AluYk3	0.552258	FALSE	Interneuron_3	2.30684	2.38561
0.0426258	0.141062	0.534	0.532	1	DS_vs_CTL	SoloTE-MSTA	0.10572	FALSE	Interneuron_3	2.80255	3.88109
0.299608	0.140859	0.265	0.236	1	DS_vs_CTL	SoloTE-MIR1-Amn	0.398153	FALSE	Interneuron_3	1.00296	1.42615
0.0879082	0.140809	0.504	0.504	1	DS_vs_CTL	SoloTE-MER58A	0.169392	FALSE	Interneuron_3	2.43874	3.295
0.280222	0.140525	0.275	0.245	1	DS_vs_CTL	SoloTE-MLT1F2	0.377159	FALSE	Interneuron_3	0.975904	1.2535
0.320048	0.139022	0.124	0.108	1	DS_vs_CTL	SoloTE-MLT1G1	0.415399	FALSE	Interneuron_3	0.402869	0.557423
0.494859	0.138068	0.143	0.126	1	DS_vs_CTL	SoloTE-MLT1N2	0.568634	FALSE	Interneuron_3	0.531885	0.721087
0.395489	0.137597	0.051	0.054	1	DS_vs_CTL	SoloTE-Charlie20a	0.48683	FALSE	Interneuron_3	0.175253	0.254395
0.00489636	0.13748	0.082	0.062	1	DS_vs_CTL	SoloTE-L1M3e	0.0235873	FALSE	Interneuron_3	0.222306	0.287384
0.815847	0.13493	0.088	0.08	1	DS_vs_CTL	SoloTE-Tigger8	0.848007	FALSE	Interneuron_3	0.246563	0.294022
0.258892	0.134304	0.414	0.398	1	DS_vs_CTL	SoloTE-MER33	0.359294	FALSE	Interneuron_3	2.00457	2.65965
0.428534	0.132641	0.056	0.046	1	DS_vs_CTL	SoloTE-LTR54B	0.513625	FALSE	Interneuron_3	0.148941	0.173623
0.576759	0.130748	0.276	0.257	1	DS_vs_CTL	SoloTE-Tigger19b	0.639284	FALSE	Interneuron_3	1.15607	1.34299
0.285264	0.129186	0.527	0.491	1	DS_vs_CTL	SoloTE-AluSq4	0.381113	FALSE	Interneuron_3	2.82101	3.00094
0.537122	0.128957	0.103	0.091	1	DS_vs_CTL	SoloTE-MLT2A1	0.606593	FALSE	Interneuron_3	0.295192	0.398634
0.202632	0.127747	0.066	0.055	1	DS_vs_CTL	SoloTE-Charlie22a	0.29986	FALSE	Interneuron_3	0.163366	0.225876
0.14026	0.126542	0.145	0.124	1	DS_vs_CTL	SoloTE-LTR7	0.231915	FALSE	Interneuron_3	0.465021	0.501958
0.017085	0.126484	0.246	0.205	1	DS_vs_CTL	SoloTE-L1PBa	0.0545198	FALSE	Interneuron_3	0.989582	1.28141
0.155492	0.12633	0.241	0.212	1	DS_vs_CTL	SoloTE-Charlie5	0.249684	FALSE	Interneuron_3	0.767718	0.883771
0.493664	0.125374	0.548	0.531	1	DS_vs_CTL	SoloTE-Charlie1a	0.568565	FALSE	Interneuron_3	2.97635	3.75921
0.0647085	0.122619	0.901	0.875	1	DS_vs_CTL	SoloTE-AluSg4	0.136214	FALSE	Interneuron_3	10.3445	11.3836
0.822473	0.122613	0.157	0.147	1	DS_vs_CTL	SoloTE-MER58C	0.853124	FALSE	Interneuron_3	0.601992	0.802932
0.0887888	0.122456	0.198	0.17	1	DS_vs_CTL	SoloTE-Tigger2b-Pri	0.170434	FALSE	Interneuron_3	0.705697	0.843066
0.0513887	0.121081	0.629	0.653	1	DS_vs_CTL	SoloTE-L1MB5	0.117768	FALSE	Interneuron_3	4.05285	6.14001
0.134245	0.11924	0.056	0.044	1	DS_vs_CTL	SoloTE-LTR50	0.224938	FALSE	Interneuron_3	0.181582	0.229426
0.945259	0.11871	0.072	0.068	1	DS_vs_CTL	SoloTE-LTR106-Mam	0.956716	FALSE	Interneuron_3	0.109992	0.112492
0.93945	0.116253	0.083	0.079	1	DS_vs_CTL	SoloTE-HERVK9-int	0.952762	FALSE	Interneuron_3	0.390456	0.466287
0.444694	0.115877	0.076	0.078	1	DS_vs_CTL	SoloTE-LTR82A	0.526694	FALSE	Interneuron_3	0.201509	0.253021
0.193853	0.11449	0.276	0.282	1	DS_vs_CTL	SoloTE-MamRTE1	0.289298	FALSE	Interneuron_3	1.1084	1.74805
0.268005	0.11327	0.086	0.072	1	DS_vs_CTL	SoloTE-LTR5B	0.367864	FALSE	Interneuron_3	0.3497	0.361298
0.184688	0.112323	0.969	0.955	1	DS_vs_CTL	SoloTE-L1PA3	0.2821	FALSE	Interneuron_3	15.0102	18.5481
0.0668832	0.110387	0.201	0.174	1	DS_vs_CTL	SoloTE-Tigger4	0.139619	FALSE	Interneuron_3	0.645329	0.849707
0.796283	0.105245	0.155	0.148	1	DS_vs_CTL	SoloTE-L4-B-Mam	0.838105	FALSE	Interneuron_3	0.507091	0.708445
0.673259	0.104107	0.256	0.24	1	DS_vs_CTL	SoloTE-Tigger13a	0.728516	FALSE	Interneuron_3	0.923066	1.21468
0.136561	0.102471	0.062	0.049	1	DS_vs_CTL	SoloTE-LTR6A	0.226546	FALSE	Interneuron_3	0.17602	0.185612
0.0130297	0.102444	0.063	0.046	1	DS_vs_CTL	SoloTE-MER34B-int	0.04502	FALSE	Interneuron_3	0.230153	0.232835
0.196306	0.101696	0.371	0.333	1	DS_vs_CTL	SoloTE-L1P1	0.291837	FALSE	Interneuron_3	1.56017	1.82015
0.0496493	0.100839	0.955	0.935	1	DS_vs_CTL	SoloTE-AluSx4	0.115159	FALSE	Interneuron_3	16.4275	18.2692
0.6839	0.100118	0.155	0.142	1	DS_vs_CTL	SoloTE-MARNA	0.738435	FALSE	Interneuron_3	0.525019	0.701962
0.897147	0.0953505	0.299	0.29	1	DS_vs_CTL	SoloTE-MSTB	0.921047	FALSE	Interneuron_3	1.28095	1.72497
0.0990216	0.0945188	0.129	0.113	1	DS_vs_CTL	SoloTE-MER4E1	0.182389	FALSE	Interneuron_3	0.360474	0.472261
0.0150555	0.0938119	0.945	0.912	1	DS_vs_CTL	SoloTE-AluSg7	0.0499522	FALSE	Interneuron_3	12.7043	13.9756
0.442445	0.0935707	0.096	0.084	1	DS_vs_CTL	SoloTE-Charlie16a	0.52652	FALSE	Interneuron_3	0.222019	0.309655
0.128696	0.093028	0.062	0.052	1	DS_vs_CTL	SoloTE-Kanga1c	0.220058	FALSE	Interneuron_3	0.187538	0.255838
0.0487053	0.0913195	0.081	0.066	1	DS_vs_CTL	SoloTE-LTR16A	0.114025	FALSE	Interneuron_3	0.261314	0.389998
0.0269753	0.091056	0.998	0.99	1	DS_vs_CTL	SoloTE-AluSc8	0.0746664	FALSE	Interneuron_3	34.9828	38.0261
0.563153	0.0857796	0.099	0.09	1	DS_vs_CTL	SoloTE-Charlie15b	0.628373	FALSE	Interneuron_3	0.319186	0.421532
0.115133	0.084544	0.052	0.043	1	DS_vs_CTL	SoloTE-MER66-int	0.203105	FALSE	Interneuron_3	0.164787	0.222563
0.438475	0.0837146	0.453	0.426	1	DS_vs_CTL	SoloTE-AluSq10	0.523038	FALSE	Interneuron_3	2.34918	2.44734
0.993163	0.0818614	0.103	0.102	1	DS_vs_CTL	SoloTE-Tigger3c	0.99515	FALSE	Interneuron_3	0.476607	0.657048
0.0590603	0.0804861	1	0.998	1	DS_vs_CTL	SoloTE-AluJr	0.128649	FALSE	Interneuron_3	65.0634	72.5239
0.0330248	0.0790981	0.063	0.05	1	DS_vs_CTL	SoloTE-MLT1E3	0.0872067	FALSE	Interneuron_3	0.182224	0.28131
0.20838	0.079027	1	1	1	DS_vs_CTL	SoloTE-AluJb	0.304368	FALSE	Interneuron_3	115.367	130.694
0.233593	0.074911	0.183	0.164	1	DS_vs_CTL	SoloTE-L1PB	0.332472	FALSE	Interneuron_3	0.865482	0.906986
0.103395	0.0747882	0.999	0.995	1	DS_vs_CTL	SoloTE-AluSz6	0.189055	FALSE	Interneuron_3	52.8738	60.3358
0.0913205	0.0726573	1	1	1	DS_vs_CTL	SoloTE-AluSx	0.173301	FALSE	Interneuron_3	152.018	165.188
0.083849	0.0694321	0.193	0.17	1	DS_vs_CTL	SoloTE-LTR33	0.164095	FALSE	Interneuron_3	0.646744	0.952004
0.91654	0.0691609	0.168	0.161	1	DS_vs_CTL	SoloTE-THE1D-int	0.935207	FALSE	Interneuron_3	0.50169	0.694974
0.231845	0.0679881	0.998	0.995	1	DS_vs_CTL	SoloTE-AluSc	0.33187	FALSE	Interneuron_3	49.7449	54.5234
0.311999	0.0678097	0.99	0.987	1	DS_vs_CTL	SoloTE-AluSq	0.408124	FALSE	Interneuron_3	29.2464	32.6396
0.622136	0.0667472	0.06	0.054	1	DS_vs_CTL	SoloTE-LTR2	0.680546	FALSE	Interneuron_3	0.198168	0.205456
0.0858385	0.0654234	0.072	0.061	1	DS_vs_CTL	SoloTE-MER121	0.166043	FALSE	Interneuron_3	0.139839	0.19128
0.203877	0.0645965	0.955	0.939	1	DS_vs_CTL	SoloTE-AluJr4	0.300418	FALSE	Interneuron_3	15.1956	17.0374
0.183692	0.0640115	1	0.997	1	DS_vs_CTL	SoloTE-AluJo	0.281436	FALSE	Interneuron_3	59.3541	65.8885
0.760693	0.0607612	0.335	0.321	1	DS_vs_CTL	SoloTE-Alu	0.805724	FALSE	Interneuron_3	1.54565	1.56221
0.537579	0.058974	0.253	0.239	1	DS_vs_CTL	SoloTE-L1P2	0.606593	FALSE	Interneuron_3	1.17955	1.35182
0.650168	0.0582991	0.439	0.44	1	DS_vs_CTL	SoloTE-L1M4c	0.706582	FALSE	Interneuron_3	2.1272	2.88871
0.095122	0.0582349	1	0.997	1	DS_vs_CTL	SoloTE-AluSg	0.179178	FALSE	Interneuron_3	52.9186	57.7848
0.394909	0.0570467	0.878	0.858	1	DS_vs_CTL	SoloTE-AluSc5	0.48683	FALSE	Interneuron_3	9.97114	10.7813
0.177248	0.052673	0.271	0.245	1	DS_vs_CTL	SoloTE-MER4-int	0.274078	FALSE	Interneuron_3	1.12481	1.19844
0.319685	0.0512526	0.138	0.127	1	DS_vs_CTL	SoloTE-MER4A1	0.415399	FALSE	Interneuron_3	0.406614	0.541162
0.603917	0.0499004	0.114	0.106	1	DS_vs_CTL	SoloTE-LTR17	0.667909	FALSE	Interneuron_3	0.425704	0.510762
0.508624	0.0491224	1	1	1	DS_vs_CTL	SoloTE-AluSx1	0.580457	FALSE	Interneuron_3	157.501	172.969
0.38165	0.0471485	0.127	0.116	1	DS_vs_CTL	SoloTE-MER68	0.475639	FALSE	Interneuron_3	0.409658	0.608985
0.906684	0.0458745	0.996	0.996	1	DS_vs_CTL	SoloTE-AluSx3	0.927038	FALSE	Interneuron_3	38.8975	43.156
0.62772	0.045328	1	1	1	DS_vs_CTL	SoloTE-AluSz	0.683669	FALSE	Interneuron_3	132.869	148.245
0.0595161	0.0420063	0.07	0.056	1	DS_vs_CTL	SoloTE-MER92-int	0.12908	FALSE	Interneuron_3	0.210533	0.270906
0.9592	0.040545	0.563	0.557	1	DS_vs_CTL	SoloTE-AluYh3	0.967755	FALSE	Interneuron_3	3.28127	3.63502
0.0495256	0.0396015	0.082	0.069	1	DS_vs_CTL	SoloTE-L1M3f	0.115159	FALSE	Interneuron_3	0.211827	0.346428
0.365797	0.0326793	0.082	0.074	1	DS_vs_CTL	SoloTE-MER4B-int	0.461315	FALSE	Interneuron_3	0.29705	0.34966
0.212115	0.0309716	0.071	0.062	1	DS_vs_CTL	SoloTE-LTR67B	0.308923	FALSE	Interneuron_3	0.266108	0.3397
0.387176	0.0276146	1	0.998	1	DS_vs_CTL	SoloTE-AluSq2	0.480137	FALSE	Interneuron_3	79.6857	86.6684
0.965712	0.0275481	1	1	1	DS_vs_CTL	SoloTE-AluSp	0.971529	FALSE	Interneuron_3	81.4726	89.2272
0.0964697	0.0272799	0.123	0.108	1	DS_vs_CTL	SoloTE-L2-3-Crp	0.180341	FALSE	Interneuron_3	0.367605	0.631421
0.141693	0.0267959	0.855	0.826	1	DS_vs_CTL	SoloTE-AluYm1	0.233514	FALSE	Interneuron_3	8.82938	9.08026
0.803154	0.0266647	0.491	0.477	1	DS_vs_CTL	SoloTE-FAM	0.839182	FALSE	Interneuron_3	2.2917	2.51663
0.520811	0.0265361	0.068	0.062	1	DS_vs_CTL	SoloTE-Charlie21a	0.59167	FALSE	Interneuron_3	0.218371	0.280452
0.999391	0.0211054	0.708	0.708	1	DS_vs_CTL	SoloTE-AluYc	0.999391	FALSE	Interneuron_3	5.4862	5.81515
0.414286	0.0190446	0.441	0.425	1	DS_vs_CTL	SoloTE-ERVL-E-int	0.501347	FALSE	Interneuron_3	1.33461	1.59531
0.753666	0.018124	1	1	1	DS_vs_CTL	SoloTE-AluY	0.801671	FALSE	Interneuron_3	194.888	202.255
0.849053	0.0149465	0.401	0.404	1	DS_vs_CTL	SoloTE-AluYk4	0.877064	FALSE	Interneuron_3	1.84764	1.95631
0.126944	0.0118064	0.065	0.055	1	DS_vs_CTL	SoloTE-MER106B	0.217804	FALSE	Interneuron_3	0.211905	0.288158
0.119097	0.0117167	0.155	0.143	1	DS_vs_CTL	SoloTE-L1MEb	0.207179	FALSE	Interneuron_3	0.564729	0.840156
0.406042	0.0116863	0.32	0.308	1	DS_vs_CTL	SoloTE-LTR81B	0.493755	FALSE	Interneuron_3	1.16942	1.21531
0.960028	0.00991713	0.949	0.948	1	DS_vs_CTL	SoloTE-FLAM-C	0.967755	FALSE	Interneuron_3	13.7188	14.5199
0.370882	0.00719136	0.183	0.171	1	DS_vs_CTL	SoloTE-Charlie2a	0.464529	FALSE	Interneuron_3	0.644352	0.788803
0.617546	0.000452824	0.096	0.091	1	DS_vs_CTL	SoloTE-LTR9B	0.678488	FALSE	Interneuron_3	0.22856	0.282069
0.258615	-0.00286033	0.056	0.065	1	DS_vs_CTL	SoloTE-LTR8B	0.359294	FALSE	Interneuron_3	0.173413	0.25238
0.00204372	-0.00485613	0.071	0.055	1	DS_vs_CTL	SoloTE-MSTB-int	0.0121893	FALSE	Interneuron_3	0.182822	0.268606
0.270793	-0.00668314	0.088	0.08	1	DS_vs_CTL	SoloTE-Arthur1B	0.368662	FALSE	Interneuron_3	0.307488	0.422844
0.117089	-0.00911777	0.45	0.425	1	DS_vs_CTL	SoloTE-HERVH-int	0.204396	FALSE	Interneuron_3	2.37606	2.47737
0.0419502	-0.00931507	0.072	0.062	1	DS_vs_CTL	SoloTE-MER106A	0.105651	FALSE	Interneuron_3	0.208964	0.324309
0.798102	-0.0102616	0.055	0.054	1	DS_vs_CTL	SoloTE-MER57E3	0.838258	FALSE	Interneuron_3	0.228659	0.232758
0.991817	-0.015371	0.138	0.139	1	DS_vs_CTL	SoloTE-LTR49-int	0.99515	FALSE	Interneuron_3	0.554885	0.729293
0.28883	-0.0155342	0.216	0.205	1	DS_vs_CTL	SoloTE-MER41A	0.384851	FALSE	Interneuron_3	0.89402	0.931704
0.923998	-0.0163719	0.697	0.69	1	DS_vs_CTL	SoloTE-AluYj4	0.940901	FALSE	Interneuron_3	4.99139	4.8426
0.262385	-0.016392	0.082	0.078	1	DS_vs_CTL	SoloTE-MamRep137	0.363043	FALSE	Interneuron_3	0.253383	0.382827
0.338873	-0.0176757	0.518	0.509	1	DS_vs_CTL	SoloTE-AluYe5	0.435862	FALSE	Interneuron_3	2.93684	2.89195
0.802107	-0.0187014	0.089	0.096	1	DS_vs_CTL	SoloTE-AluYe6	0.839182	FALSE	Interneuron_3	0.383466	0.354482
0.109368	-0.0204271	0.094	0.084	1	DS_vs_CTL	SoloTE-MLT2B1	0.196883	FALSE	Interneuron_3	0.28647	0.42547
0.556053	-0.0204399	0.076	0.074	1	DS_vs_CTL	SoloTE-MLT2A2	0.621836	FALSE	Interneuron_3	0.257904	0.35158
0.2029	-0.0211042	0.847	0.824	1	DS_vs_CTL	SoloTE-AluYa5	0.29986	FALSE	Interneuron_3	8.87736	9.16109
0.0192009	-0.0376004	0.058	0.049	1	DS_vs_CTL	SoloTE-MLT1D-int	0.0598348	FALSE	Interneuron_3	0.158727	0.227499
0.255145	-0.0430765	0.28	0.274	1	DS_vs_CTL	SoloTE-MER39	0.35706	FALSE	Interneuron_3	0.686575	0.754608
0.0430876	-0.0473398	0.052	0.041	1	DS_vs_CTL	SoloTE-LTR34	0.105818	FALSE	Interneuron_3	0.0559957	0.0574744
0.862257	-0.0487242	0.086	0.09	1	DS_vs_CTL	SoloTE-MER45A	0.888869	FALSE	Interneuron_3	0.251802	0.339698
0.0117819	-0.0492383	0.55	0.521	1	DS_vs_CTL	SoloTE-AluYf1	0.0430855	FALSE	Interneuron_3	3.02719	3.09015
0.00575838	-0.0571575	0.16	0.141	1	DS_vs_CTL	SoloTE-MER101-int	0.0259905	FALSE	Interneuron_3	0.55279	0.702967
0.0393021	-0.0578424	0.107	0.096	1	DS_vs_CTL	SoloTE-AluYh3a3	0.100732	FALSE	Interneuron_3	0.352604	0.384555
0.710585	-0.0617567	0.314	0.316	1	DS_vs_CTL	SoloTE-MLT1A	0.759068	FALSE	Interneuron_3	1.36593	1.68149
0.509839	-0.0676915	0.291	0.294	1	DS_vs_CTL	SoloTE-AluYg6	0.580522	FALSE	Interneuron_3	1.40899	1.441
0.424252	-0.068227	0.062	0.06	1	DS_vs_CTL	SoloTE-ORSL	0.510938	FALSE	Interneuron_3	0.209373	0.229743
0.0156002	-0.0690244	0.083	0.072	1	DS_vs_CTL	SoloTE-LTR40a	0.0507514	FALSE	Interneuron_3	0.244894	0.350155
0.437933	-0.0694513	0.078	0.076	1	DS_vs_CTL	SoloTE-MER77	0.523038	FALSE	Interneuron_3	0.228918	0.293264
0.405836	-0.0719646	0.621	0.649	1	DS_vs_CTL	SoloTE-FRAM	0.493755	FALSE	Interneuron_3	4.21324	4.39415
0.901232	-0.0724344	0.084	0.09	1	DS_vs_CTL	SoloTE-LTR79	0.923348	FALSE	Interneuron_3	0.280158	0.390995
0.0602845	-0.0726118	0.086	0.101	1	DS_vs_CTL	SoloTE-MER72B	0.129625	FALSE	Interneuron_3	0.123862	0.0738831
0.305434	-0.0758898	0.337	0.332	1	DS_vs_CTL	SoloTE-Kanga2-a	0.403754	FALSE	Interneuron_3	0.540453	0.606934
0.00244533	-0.0762685	0.135	0.118	1	DS_vs_CTL	SoloTE-MER1A	0.0134628	FALSE	Interneuron_3	0.533974	0.708073
0.042244	-0.0787799	0.062	0.054	1	DS_vs_CTL	SoloTE-MADE2	0.105651	FALSE	Interneuron_3	0.230002	0.286424
0.125241	-0.0803392	0.076	0.068	1	DS_vs_CTL	SoloTE-MER11C	0.21562	FALSE	Interneuron_3	0.298633	0.319514
0.689826	-0.0826525	0.071	0.071	1	DS_vs_CTL	SoloTE-MER58D	0.743232	FALSE	Interneuron_3	0.175188	0.197042
0.0531616	-0.084923	0.087	0.08	1	DS_vs_CTL	SoloTE-MER4B	0.118712	FALSE	Interneuron_3	0.251236	0.338267
0.938368	-0.0952168	0.076	0.079	1	DS_vs_CTL	SoloTE-MER34	0.952762	FALSE	Interneuron_3	0.258305	0.302567
0.785804	-0.0967739	0.052	0.053	1	DS_vs_CTL	SoloTE-MLT1E1	0.830565	FALSE	Interneuron_3	0.165244	0.196727
0.757519	-0.100258	0.063	0.07	1	DS_vs_CTL	SoloTE-LTR103-Mam	0.804062	FALSE	Interneuron_3	0.318036	0.445474
0.477964	-0.102151	0.103	0.103	1	DS_vs_CTL	SoloTE-MER2B	0.558182	FALSE	Interneuron_3	0.393456	0.503701
0.124515	-0.110146	0.758	0.764	1	DS_vs_CTL	SoloTE-AluYb8	0.21511	FALSE	Interneuron_3	6.15294	5.90894
0.280442	-0.112168	0.081	0.078	1	DS_vs_CTL	SoloTE-MER4E	0.377159	FALSE	Interneuron_3	0.288492	0.294668
0.257978	-0.112194	0.096	0.09	1	DS_vs_CTL	SoloTE-LTR5-Hs	0.359294	FALSE	Interneuron_3	0.311101	0.313256
0.886296	-0.113333	0.076	0.082	1	DS_vs_CTL	SoloTE-MLT2B3	0.911774	FALSE	Interneuron_3	0.194258	0.293121
0.570186	-0.114337	0.118	0.121	1	DS_vs_CTL	SoloTE-Cheshire	0.634807	FALSE	Interneuron_3	0.414525	0.565417
0.377448	-0.115034	0.081	0.075	1	DS_vs_CTL	SoloTE-HERVIP10B3-int	0.471575	FALSE	Interneuron_3	0.229984	0.245428
0.0973602	-0.116248	0.845	0.871	1	DS_vs_CTL	SoloTE-L1PA2	0.180657	FALSE	Interneuron_3	9.5004	10.2916
0.233104	-0.12222	0.101	0.095	1	DS_vs_CTL	SoloTE-LTR13	0.332472	FALSE	Interneuron_3	0.355393	0.360475
0.488638	-0.123802	0.232	0.25	1	DS_vs_CTL	SoloTE-Tigger4a	0.565815	FALSE	Interneuron_3	1.07872	1.4932
0.627716	-0.127606	0.247	0.263	1	DS_vs_CTL	SoloTE-AluYc3	0.683669	FALSE	Interneuron_3	1.0117	1.09814
0.426755	-0.133314	0.063	0.067	1	DS_vs_CTL	SoloTE-MER113A	0.51272	FALSE	Interneuron_3	0.20873	0.306524
0.790565	-0.133706	0.06	0.066	1	DS_vs_CTL	SoloTE-Helitron3Na-Mam	0.833838	FALSE	Interneuron_3	0.199157	0.274005
0.455483	-0.133772	0.186	0.19	1	DS_vs_CTL	SoloTE-MER102b	0.535497	FALSE	Interneuron_3	0.760023	1.03105
0.164222	-0.149439	0.179	0.182	1	DS_vs_CTL	SoloTE-MSTB1	0.261192	FALSE	Interneuron_3	0.705828	0.998308
0.193004	-0.158888	0.118	0.119	1	DS_vs_CTL	SoloTE-AluYa8	0.289298	FALSE	Interneuron_3	0.482543	0.430323
0.390203	-0.189639	0.06	0.063	1	DS_vs_CTL	SoloTE-MER31A	0.482696	FALSE	Interneuron_3	0.186918	0.251644
0.0242626	-0.19179	0.125	0.124	1	DS_vs_CTL	SoloTE-MER50	0.0695244	FALSE	Interneuron_3	0.432828	0.536031
0.0960149	-0.193485	0.061	0.061	1	DS_vs_CTL	SoloTE-Charlie10	0.180163	FALSE	Interneuron_3	0.280648	0.347233
0.098997	-0.201484	0.078	0.073	1	DS_vs_CTL	SoloTE-LTR5A	0.182389	FALSE	Interneuron_3	0.288207	0.295561
0.19402	-0.207421	0.171	0.185	1	DS_vs_CTL	SoloTE-Harlequin-int	0.289298	FALSE	Interneuron_3	0.892636	0.819095
0.144428	-0.216789	0.056	0.056	1	DS_vs_CTL	SoloTE-MLT2C1	0.23724	FALSE	Interneuron_3	0.185173	0.234225
0.0514793	-0.222798	0.168	0.166	1	DS_vs_CTL	SoloTE-AluYd8	0.117768	FALSE	Interneuron_3	0.614071	0.590844
0.272074	-0.230076	0.17	0.183	1	DS_vs_CTL	SoloTE-LTR12C	0.369401	FALSE	Interneuron_3	0.567307	0.643458
0.17573	-0.231551	0.065	0.066	1	DS_vs_CTL	SoloTE-LTR37-int	0.272572	FALSE	Interneuron_3	0.248794	0.301207
0.328736	-0.237244	0.046	0.06	1	DS_vs_CTL	SoloTE-MER4C	0.425573	FALSE	Interneuron_3	0.13225	0.147049
0.148616	-0.237545	0.061	0.064	1	DS_vs_CTL	SoloTE-MER51A	0.241743	FALSE	Interneuron_3	0.252428	0.316456
0.62129	-0.244562	0.052	0.055	1	DS_vs_CTL	SoloTE-LTR8A	0.680546	FALSE	Interneuron_3	0.17861	0.226365
0.0460188	-0.245508	0.109	0.108	1	DS_vs_CTL	SoloTE-MER31-int	0.110313	FALSE	Interneuron_3	0.395781	0.422483
0.154156	-0.274716	0.152	0.165	1	DS_vs_CTL	SoloTE-AluYk11	0.248335	FALSE	Interneuron_3	0.634469	0.652968
0.524726	-0.320988	0.047	0.054	1	DS_vs_CTL	SoloTE-MER66B	0.594769	FALSE	Interneuron_3	0.218225	0.260304
0.0307778	-0.326408	0.198	0.229	1	DS_vs_CTL	SoloTE-LTR7B	0.0824581	FALSE	Interneuron_3	0.816722	0.798842
0.000583427	-0.332035	0.52	0.58	0.631268	DS_vs_CTL	SoloTE-L1HS	0.00487162	TRUE	Interneuron_3	3.41699	3.23246
0.223073	-0.36366	0.068	0.08	1	DS_vs_CTL	SoloTE-LTR25-int	0.321148	FALSE	Interneuron_3	0.296143	0.314374
0.170458	-0.413155	0.089	0.114	1	DS_vs_CTL	SoloTE-MER110-int	0.26771	FALSE	Interneuron_3	0.340752	0.286072
0.404576	-0.429141	0.048	0.058	1	DS_vs_CTL	SoloTE-MER63D	0.493755	FALSE	Interneuron_3	0.245603	0.289956
0.193217	-0.44553	0.055	0.072	1	DS_vs_CTL	SoloTE-MLT1F2-int	0.289298	FALSE	Interneuron_3	0.244959	0.195277
0.0834303	-0.47068	0.05	0.058	1	DS_vs_CTL	SoloTE-MSTB2	0.163916	FALSE	Interneuron_3	0.174476	0.255032
0.0154716	-0.532453	0.065	0.073	1	DS_vs_CTL	SoloTE-LTR84b	0.0507514	FALSE	Interneuron_3	0.230052	0.237617
0.0693037	-0.614437	0.047	0.061	1	DS_vs_CTL	SoloTE-LTR12E	0.142411	FALSE	Interneuron_3	0.188335	0.135103
0.0357275	-0.766763	0.042	0.062	1	DS_vs_CTL	SoloTE-LTR49	0.0932265	FALSE	Interneuron_3	0.21008	0.263053

## Sheet: Interneuron_4
p_val	avg_log2FC	pct.1	pct.2	p_val_adj	comparison	gene	FDR	sig	cellsubtype	CTL_expression	DS_expression
0.0241724	4.29258	0.05	0	1	DS_vs_CTL	SoloTE-Ricksha-c	0.319898	FALSE	Interneuron_4	0.138705	0.213927
0.0241724	3.97181	0.05	0	1	DS_vs_CTL	SoloTE-LTR26B	0.319898	FALSE	Interneuron_4	0.0438084	0.046401
0.00466392	3.83958	0.076	0	1	DS_vs_CTL	SoloTE-LTR36	0.227957	FALSE	Interneuron_4	0.0987248	0.126849
0.0241724	3.51042	0.05	0	1	DS_vs_CTL	SoloTE-LTR83	0.319898	FALSE	Interneuron_4	0.0641939	0.0983157
0.00805951	3.4946	0.067	0	1	DS_vs_CTL	SoloTE-LTR2B	0.268036	FALSE	Interneuron_4	0.096315	0.108743
0.0139416	3.41204	0.059	0	1	DS_vs_CTL	SoloTE-MER6B	0.297009	FALSE	Interneuron_4	0.109827	0.154654
0.00805951	3.32029	0.067	0	1	DS_vs_CTL	SoloTE-LTR85b	0.268036	FALSE	Interneuron_4	0.0772305	0.162211
0.0241724	3.27906	0.05	0	1	DS_vs_CTL	SoloTE-MER51D	0.319898	FALSE	Interneuron_4	0.0310582	0.0424252
0.0241724	3.20608	0.05	0	1	DS_vs_CTL	SoloTE-LTR24B	0.319898	FALSE	Interneuron_4	0.0598561	0.0747692
0.000853735	3.20306	0.168	0.014	0.923741	DS_vs_CTL	SoloTE-Penelope1-Vert	0.0885039	FALSE	Interneuron_4	0.168973	0.223293
0.218171	2.34473	0.059	0.014	1	DS_vs_CTL	SoloTE-MER72	0.768723	FALSE	Interneuron_4	0.0677994	0.0895579
0.0831508	2.30316	0.084	0.014	1	DS_vs_CTL	SoloTE-MER89-int	0.61672	FALSE	Interneuron_4	0.137001	0.162691
0.00132316	2.29031	0.151	0.014	1	DS_vs_CTL	SoloTE-LTR16A	0.10481	FALSE	Interneuron_4	0.261314	0.389998
0.313795	2.20603	0.05	0.014	1	DS_vs_CTL	SoloTE-MamGypLTR3a	0.830556	FALSE	Interneuron_4	0.115442	0.161109
0.179062	2.19137	0.067	0.014	1	DS_vs_CTL	SoloTE-MamGypLTR1c	0.758099	FALSE	Interneuron_4	0.0828548	0.111926
0.106642	2.07608	0.101	0.027	1	DS_vs_CTL	SoloTE-LTR10A	0.689961	FALSE	Interneuron_4	0.20292	0.2251
0.0795543	1.96903	0.084	0.014	1	DS_vs_CTL	SoloTE-MER131	0.61672	FALSE	Interneuron_4	0.159704	0.228206
0.365667	1.93337	0.05	0.014	1	DS_vs_CTL	SoloTE-MER70A	0.854418	FALSE	Interneuron_4	0.0539542	0.0703774
0.353452	1.89912	0.05	0.014	1	DS_vs_CTL	SoloTE-HERVL40-int	0.854418	FALSE	Interneuron_4	0.153594	0.227823
0.183258	1.88758	0.067	0.014	1	DS_vs_CTL	SoloTE-MER61A	0.758099	FALSE	Interneuron_4	0.0500836	0.0857689
0.183602	1.87337	0.067	0.014	1	DS_vs_CTL	SoloTE-LTR48B	0.758099	FALSE	Interneuron_4	0.105601	0.143661
0.0273642	1.83612	0.16	0.041	1	DS_vs_CTL	SoloTE-CR1-Mam	0.340411	FALSE	Interneuron_4	0.472095	0.686156
0.0417103	1.80666	0.126	0.027	1	DS_vs_CTL	SoloTE-Kanga11a	0.440391	FALSE	Interneuron_4	0.150663	0.193887
0.265425	1.79218	0.059	0.014	1	DS_vs_CTL	SoloTE-LTR33B	0.798186	FALSE	Interneuron_4	0.0973773	0.132379
0.264436	1.78178	0.059	0.014	1	DS_vs_CTL	SoloTE-MER83	0.798186	FALSE	Interneuron_4	0.0843772	0.0927916
0.223015	1.7558	0.084	0.027	1	DS_vs_CTL	SoloTE-MER66B	0.768723	FALSE	Interneuron_4	0.218225	0.260304
0.371488	1.71956	0.05	0.014	1	DS_vs_CTL	SoloTE-LTR23-int	0.854418	FALSE	Interneuron_4	0.0854195	0.0888149
0.362814	1.70639	0.05	0.014	1	DS_vs_CTL	SoloTE-ORSL-2b	0.854418	FALSE	Interneuron_4	0.06397	0.0834683
0.12802	1.65034	0.101	0.027	1	DS_vs_CTL	SoloTE-MER91A	0.721386	FALSE	Interneuron_4	0.192412	0.320452
0.0442377	1.60899	0.193	0.068	1	DS_vs_CTL	SoloTE-L1M3e	0.458597	FALSE	Interneuron_4	0.222306	0.287384
0.375642	1.58607	0.05	0.014	1	DS_vs_CTL	SoloTE-LTR101-Mam	0.854418	FALSE	Interneuron_4	0.0850428	0.14026
0.375245	1.57542	0.05	0.014	1	DS_vs_CTL	SoloTE-MER90	0.854418	FALSE	Interneuron_4	0.139703	0.188923
0.0561789	1.54826	0.143	0.041	1	DS_vs_CTL	SoloTE-MER4A1	0.520053	FALSE	Interneuron_4	0.406614	0.541162
0.179687	1.50072	0.092	0.027	1	DS_vs_CTL	SoloTE-HERVL74-int	0.758099	FALSE	Interneuron_4	0.127561	0.171303
0.373843	1.49545	0.05	0.014	1	DS_vs_CTL	SoloTE-L1P5	0.854418	FALSE	Interneuron_4	0.353272	0.343703
0.0780509	1.49131	0.109	0.027	1	DS_vs_CTL	SoloTE-MER66-int	0.61672	FALSE	Interneuron_4	0.164787	0.222563
8.30726e-05	1.47463	0.479	0.178	0.0898846	DS_vs_CTL	SoloTE-AluYc3	0.0251569	TRUE	Interneuron_4	1.0117	1.09814
0.0952493	1.45849	0.076	0.014	1	DS_vs_CTL	SoloTE-MLT1A1-int	0.660514	FALSE	Interneuron_4	0.163508	0.163287
0.0115999	1.45631	0.168	0.041	1	DS_vs_CTL	SoloTE-MER4B	0.297009	FALSE	Interneuron_4	0.251236	0.338267
0.0201406	1.38571	0.21	0.068	1	DS_vs_CTL	SoloTE-Tigger2b-Pri	0.319898	FALSE	Interneuron_4	0.705697	0.843066
0.0081876	1.35058	0.168	0.041	1	DS_vs_CTL	SoloTE-LTR79	0.268036	FALSE	Interneuron_4	0.280158	0.390995
0.0516037	1.3324	0.21	0.082	1	DS_vs_CTL	SoloTE-MLT2D	0.508186	FALSE	Interneuron_4	0.417431	0.53641
0.337178	1.33033	0.076	0.027	1	DS_vs_CTL	SoloTE-MamRep137	0.854418	FALSE	Interneuron_4	0.253383	0.382827
0.0134094	1.30414	0.168	0.041	1	DS_vs_CTL	SoloTE-LTR16C	0.297009	FALSE	Interneuron_4	0.383912	0.628033
0.139807	1.30142	0.143	0.055	1	DS_vs_CTL	SoloTE-MER63A	0.721386	FALSE	Interneuron_4	0.242636	0.365156
0.364031	1.26889	0.05	0.014	1	DS_vs_CTL	SoloTE-LTR54B	0.854418	FALSE	Interneuron_4	0.148941	0.173623
0.0611532	1.26531	0.244	0.11	1	DS_vs_CTL	SoloTE-L1ME5	0.538829	FALSE	Interneuron_4	0.731216	1.28463
0.244104	1.25879	0.084	0.027	1	DS_vs_CTL	SoloTE-LTR9B	0.78038	FALSE	Interneuron_4	0.22856	0.282069
0.156777	1.2338	0.16	0.068	1	DS_vs_CTL	SoloTE-MER53	0.732709	FALSE	Interneuron_4	0.431773	0.601794
0.155431	1.23276	0.118	0.041	1	DS_vs_CTL	SoloTE-PRIMA4-int	0.732709	FALSE	Interneuron_4	0.112124	0.134046
0.230994	1.22104	0.084	0.027	1	DS_vs_CTL	SoloTE-MER57B1	0.776638	FALSE	Interneuron_4	0.0937158	0.123525
0.191247	1.21771	0.151	0.068	1	DS_vs_CTL	SoloTE-L1P4a	0.758099	FALSE	Interneuron_4	0.331389	0.37551
0.160656	1.21247	0.176	0.082	1	DS_vs_CTL	SoloTE-L1M3a	0.732709	FALSE	Interneuron_4	0.256697	0.338376
0.446357	1.20762	0.084	0.041	1	DS_vs_CTL	SoloTE-MLT1D-int	0.880066	FALSE	Interneuron_4	0.158727	0.227499
0.570498	1.20736	0.059	0.027	1	DS_vs_CTL	SoloTE-MER96	0.89668	FALSE	Interneuron_4	0.085303	0.0980726
0.529896	1.20664	0.109	0.068	1	DS_vs_CTL	SoloTE-Charlie19a	0.892258	FALSE	Interneuron_4	0.324952	0.435723
0.634719	1.10225	0.067	0.041	1	DS_vs_CTL	SoloTE-MSTD-int	0.933273	FALSE	Interneuron_4	0.153046	0.218853
0.224932	1.08302	0.084	0.027	1	DS_vs_CTL	SoloTE-LTR53-int	0.768723	FALSE	Interneuron_4	0.101537	0.118367
0.480103	1.07135	0.101	0.055	1	DS_vs_CTL	SoloTE-LTR103-Mam	0.884894	FALSE	Interneuron_4	0.318036	0.445474
0.29534	1.06297	0.101	0.041	1	DS_vs_CTL	SoloTE-LTR8B	0.821396	FALSE	Interneuron_4	0.173413	0.25238
0.454509	1.06193	0.067	0.027	1	DS_vs_CTL	SoloTE-LTR12	0.884894	FALSE	Interneuron_4	0.087523	0.120542
0.481328	1.05496	0.084	0.041	1	DS_vs_CTL	SoloTE-LTR61	0.884894	FALSE	Interneuron_4	0.107909	0.108054
0.206487	1.04935	0.109	0.041	1	DS_vs_CTL	SoloTE-MER77	0.764494	FALSE	Interneuron_4	0.228918	0.293264
0.41257	0.99774	0.151	0.096	1	DS_vs_CTL	SoloTE-LTR5A	0.860743	FALSE	Interneuron_4	0.288207	0.295561
0.291563	0.98415	0.101	0.041	1	DS_vs_CTL	SoloTE-HUERS-P3b-int	0.821396	FALSE	Interneuron_4	0.0995962	0.25232
0.0949604	0.983497	0.21	0.096	1	DS_vs_CTL	SoloTE-AmnSINE1	0.660514	FALSE	Interneuron_4	0.192393	0.316409
0.709385	0.968804	0.05	0.027	1	DS_vs_CTL	SoloTE-MER97c	0.935393	FALSE	Interneuron_4	0.174964	0.193592
0.0221015	0.95945	0.193	0.068	1	DS_vs_CTL	SoloTE-LTR8	0.319898	FALSE	Interneuron_4	0.389586	0.480632
0.117239	0.959074	0.185	0.082	1	DS_vs_CTL	SoloTE-MER4B-int	0.70118	FALSE	Interneuron_4	0.29705	0.34966
0.162272	0.944631	0.176	0.082	1	DS_vs_CTL	SoloTE-MER61-int	0.732709	FALSE	Interneuron_4	0.323605	0.397881
0.56771	0.938878	0.092	0.055	1	DS_vs_CTL	SoloTE-MLT1E3	0.896232	FALSE	Interneuron_4	0.182224	0.28131
0.305563	0.929609	0.076	0.027	1	DS_vs_CTL	SoloTE-HERV16-int	0.829957	FALSE	Interneuron_4	0.101069	0.155944
0.297233	0.9284	0.076	0.027	1	DS_vs_CTL	SoloTE-MER44D	0.821396	FALSE	Interneuron_4	0.146428	0.198954
0.187913	0.908108	0.084	0.027	1	DS_vs_CTL	SoloTE-MamGypsy2-I	0.758099	FALSE	Interneuron_4	0.154518	0.244141
0.5852	0.902956	0.059	0.027	1	DS_vs_CTL	SoloTE-Tigger5	0.896728	FALSE	Interneuron_4	0.112113	0.157197
0.494137	0.889162	0.168	0.11	1	DS_vs_CTL	SoloTE-Ricksha	0.884894	FALSE	Interneuron_4	0.213622	0.333721
0.105302	0.873896	0.185	0.082	1	DS_vs_CTL	SoloTE-MER65A	0.689961	FALSE	Interneuron_4	0.255766	0.306735
0.0101502	0.86332	0.218	0.082	1	DS_vs_CTL	SoloTE-Cheshire	0.297009	FALSE	Interneuron_4	0.414525	0.565417
0.335011	0.859034	0.134	0.068	1	DS_vs_CTL	SoloTE-MER57-int	0.854418	FALSE	Interneuron_4	0.12584	0.206683
0.267115	0.833876	0.076	0.027	1	DS_vs_CTL	SoloTE-LTR106-Mam	0.798775	FALSE	Interneuron_4	0.109992	0.112492
0.0707281	0.80105	0.168	0.068	1	DS_vs_CTL	SoloTE-MLT1F1	0.586571	FALSE	Interneuron_4	0.362985	0.471122
0.149758	0.79423	0.109	0.041	1	DS_vs_CTL	SoloTE-MER34A	0.732709	FALSE	Interneuron_4	0.280805	0.345006
0.440965	0.787179	0.176	0.11	1	DS_vs_CTL	SoloTE-MLT1H2	0.879104	FALSE	Interneuron_4	0.618722	0.848114
0.513981	0.77987	0.118	0.068	1	DS_vs_CTL	SoloTE-L1MDb	0.892258	FALSE	Interneuron_4	0.255358	0.373532
0.47254	0.774982	0.084	0.041	1	DS_vs_CTL	SoloTE-MLT2C2	0.884894	FALSE	Interneuron_4	0.114967	0.153068
0.400414	0.767775	0.109	0.055	1	DS_vs_CTL	SoloTE-MER11C	0.854418	FALSE	Interneuron_4	0.298633	0.319514
0.135758	0.751249	0.395	0.26	1	DS_vs_CTL	SoloTE-ERVL-E-int	0.721386	FALSE	Interneuron_4	1.33461	1.59531
0.585373	0.739057	0.059	0.027	1	DS_vs_CTL	SoloTE-MER110-int	0.896728	FALSE	Interneuron_4	0.340752	0.286072
0.718009	0.721475	0.084	0.055	1	DS_vs_CTL	SoloTE-MADE2	0.935393	FALSE	Interneuron_4	0.230002	0.286424
0.37104	0.716555	0.261	0.178	1	DS_vs_CTL	SoloTE-MSTA-int	0.854418	FALSE	Interneuron_4	0.558649	0.838749
0.0500448	0.715066	0.504	0.329	1	DS_vs_CTL	SoloTE-L1ME3F	0.502062	FALSE	Interneuron_4	1.67943	2.91552
0.741264	0.710526	0.067	0.041	1	DS_vs_CTL	SoloTE-Charlie22a	0.935393	FALSE	Interneuron_4	0.163366	0.225876
0.862798	0.701974	0.05	0.041	1	DS_vs_CTL	SoloTE-MLT1E1	0.959672	FALSE	Interneuron_4	0.165244	0.196727
0.658498	0.688685	0.118	0.082	1	DS_vs_CTL	SoloTE-MLT1G	0.935393	FALSE	Interneuron_4	0.323835	0.474366
0.395179	0.68244	0.126	0.068	1	DS_vs_CTL	SoloTE-MER21-int	0.854418	FALSE	Interneuron_4	0.321212	0.444077
0.598528	0.68026	0.092	0.055	1	DS_vs_CTL	SoloTE-LTR12F	0.908011	FALSE	Interneuron_4	0.182114	0.226478
0.161934	0.678762	0.059	0.014	1	DS_vs_CTL	SoloTE-LTR1A2	0.732709	FALSE	Interneuron_4	0.0984298	0.172168
0.0297223	0.67233	0.345	0.178	1	DS_vs_CTL	SoloTE-HAL1M8	0.362496	FALSE	Interneuron_4	0.901785	1.42368
0.627821	0.666366	0.109	0.068	1	DS_vs_CTL	SoloTE-LTR25-int	0.933273	FALSE	Interneuron_4	0.296143	0.314374
0.817812	0.663669	0.05	0.041	1	DS_vs_CTL	SoloTE-HUERS-P1-int	0.942124	FALSE	Interneuron_4	0.114853	0.137755
0.242956	0.6371	0.118	0.055	1	DS_vs_CTL	SoloTE-THE1A-int	0.78038	FALSE	Interneuron_4	0.284282	0.478383
0.540324	0.637086	0.059	0.027	1	DS_vs_CTL	SoloTE-MER41C	0.892258	FALSE	Interneuron_4	0.100471	0.136857
0.725368	0.633129	0.05	0.027	1	DS_vs_CTL	SoloTE-AluYk12	0.935393	FALSE	Interneuron_4	0.151677	0.141191
0.540916	0.628855	0.059	0.027	1	DS_vs_CTL	SoloTE-MER34A1	0.892258	FALSE	Interneuron_4	0.0893393	0.123363
0.383885	0.624164	0.109	0.055	1	DS_vs_CTL	SoloTE-LTR50	0.854418	FALSE	Interneuron_4	0.181582	0.229426
0.447107	0.610793	0.101	0.055	1	DS_vs_CTL	SoloTE-Charlie15b	0.880066	FALSE	Interneuron_4	0.319186	0.421532
0.617011	0.592569	0.16	0.11	1	DS_vs_CTL	SoloTE-MER1A	0.924772	FALSE	Interneuron_4	0.533974	0.708073
0.438077	0.589012	0.387	0.315	1	DS_vs_CTL	SoloTE-MamSINE1	0.878919	FALSE	Interneuron_4	0.834092	1.13486
0.158112	0.576297	0.059	0.014	1	DS_vs_CTL	SoloTE-MSTB2-int	0.732709	FALSE	Interneuron_4	0.024393	0.0342336
0.278383	0.568279	0.445	0.342	1	DS_vs_CTL	SoloTE-MER58B	0.805636	FALSE	Interneuron_4	1.6631	2.20742
0.717015	0.537343	0.05	0.027	1	DS_vs_CTL	SoloTE-LTR9A1	0.935393	FALSE	Interneuron_4	0.0844166	0.102707
0.522774	0.536401	0.118	0.068	1	DS_vs_CTL	SoloTE-Tigger20a	0.892258	FALSE	Interneuron_4	0.161106	0.271865
0.500749	0.528068	0.059	0.027	1	DS_vs_CTL	SoloTE-L1M6B	0.887367	FALSE	Interneuron_4	0.121688	0.151666
0.761106	0.514579	0.143	0.11	1	DS_vs_CTL	SoloTE-LTR37-int	0.935393	FALSE	Interneuron_4	0.248794	0.301207
0.71879	0.511913	0.05	0.027	1	DS_vs_CTL	SoloTE-ERV24-Prim-int	0.935393	FALSE	Interneuron_4	0.0639927	0.0832544
0.545559	0.505698	0.076	0.041	1	DS_vs_CTL	SoloTE-MER63B	0.892258	FALSE	Interneuron_4	0.207266	0.335563
0.902638	0.504174	0.05	0.041	1	DS_vs_CTL	SoloTE-MER121	0.973316	FALSE	Interneuron_4	0.139839	0.19128
0.30963	0.502468	0.185	0.11	1	DS_vs_CTL	SoloTE-L2-3-Crp	0.830556	FALSE	Interneuron_4	0.367605	0.631421
0.297277	0.500702	0.16	0.096	1	DS_vs_CTL	SoloTE-LTR13	0.821396	FALSE	Interneuron_4	0.355393	0.360475
0.161103	0.498133	0.126	0.055	1	DS_vs_CTL	SoloTE-LTR6A	0.732709	FALSE	Interneuron_4	0.17602	0.185612
0.769529	0.492739	0.118	0.11	1	DS_vs_CTL	SoloTE-LTR78	0.935393	FALSE	Interneuron_4	0.302114	0.49403
0.427134	0.487232	0.118	0.068	1	DS_vs_CTL	SoloTE-MLT1G1	0.868227	FALSE	Interneuron_4	0.402869	0.557423
0.683638	0.480983	0.218	0.178	1	DS_vs_CTL	SoloTE-Tigger15a	0.935393	FALSE	Interneuron_4	0.713755	1.13713
0.798199	0.480809	0.109	0.082	1	DS_vs_CTL	SoloTE-Tigger9b	0.938104	FALSE	Interneuron_4	0.363572	0.434086
0.85316	0.480798	0.059	0.041	1	DS_vs_CTL	SoloTE-HERVE-a-int	0.954434	FALSE	Interneuron_4	0.0891802	0.110811
0.826861	0.476954	0.109	0.082	1	DS_vs_CTL	SoloTE-LOR1-int	0.942124	FALSE	Interneuron_4	0.218008	0.356546
0.477966	0.47498	0.252	0.178	1	DS_vs_CTL	SoloTE-Charlie7	0.884894	FALSE	Interneuron_4	0.990411	1.33874
0.600838	0.471885	0.126	0.082	1	DS_vs_CTL	SoloTE-MLT1A0-int	0.909298	FALSE	Interneuron_4	0.265513	0.417509
0.319715	0.467673	0.235	0.151	1	DS_vs_CTL	SoloTE-Charlie1	0.84264	FALSE	Interneuron_4	0.577154	0.759386
0.559504	0.467641	0.092	0.055	1	DS_vs_CTL	SoloTE-MER9a3	0.892258	FALSE	Interneuron_4	0.188412	0.189048
0.708624	0.461989	0.067	0.041	1	DS_vs_CTL	SoloTE-MER68B	0.935393	FALSE	Interneuron_4	0.106656	0.168422
0.367137	0.446389	0.311	0.219	1	DS_vs_CTL	SoloTE-MER113	0.854418	FALSE	Interneuron_4	0.743866	0.984617
0.833299	0.444159	0.092	0.068	1	DS_vs_CTL	SoloTE-Tigger10	0.942124	FALSE	Interneuron_4	0.205166	0.301228
0.676197	0.435957	0.109	0.11	1	DS_vs_CTL	SoloTE-MER119	0.935393	FALSE	Interneuron_4	0.307066	0.518802
0.926034	0.435122	0.067	0.055	1	DS_vs_CTL	SoloTE-HERVP71A-int	0.973316	FALSE	Interneuron_4	0.0779696	0.1377
0.257101	0.431077	0.471	0.356	1	DS_vs_CTL	SoloTE-THE1D	0.79313	FALSE	Interneuron_4	1.75155	2.6216
0.506091	0.426152	0.227	0.164	1	DS_vs_CTL	SoloTE-Tigger7	0.889234	FALSE	Interneuron_4	0.596324	0.803797
0.557552	0.418527	0.126	0.082	1	DS_vs_CTL	SoloTE-L1M2a	0.892258	FALSE	Interneuron_4	0.477723	0.631257
0.239738	0.41717	0.235	0.151	1	DS_vs_CTL	SoloTE-Charlie4a	0.78038	FALSE	Interneuron_4	0.548378	0.74581
0.159445	0.413776	0.193	0.11	1	DS_vs_CTL	SoloTE-MER102c	0.732709	FALSE	Interneuron_4	0.450741	0.661238
0.237438	0.41084	0.109	0.055	1	DS_vs_CTL	SoloTE-MamRep434	0.78038	FALSE	Interneuron_4	0.361959	0.439307
0.0795804	0.406049	0.504	0.342	1	DS_vs_CTL	SoloTE-MER33	0.61672	FALSE	Interneuron_4	2.00457	2.65965
0.141494	0.402862	0.37	0.247	1	DS_vs_CTL	SoloTE-THE1C	0.721386	FALSE	Interneuron_4	1.17959	1.8031
0.55348	0.391755	0.244	0.178	1	DS_vs_CTL	SoloTE-LTR81B	0.892258	FALSE	Interneuron_4	1.16942	1.21531
0.518244	0.389386	0.092	0.055	1	DS_vs_CTL	SoloTE-Charlie20a	0.892258	FALSE	Interneuron_4	0.175253	0.254395
0.923804	0.38819	0.05	0.041	1	DS_vs_CTL	SoloTE-HERVK14-int	0.973316	FALSE	Interneuron_4	0.110757	0.151513
0.484125	0.382698	0.076	0.041	1	DS_vs_CTL	SoloTE-Kanga1c	0.884894	FALSE	Interneuron_4	0.187538	0.255838
0.4466	0.379744	0.05	0.068	1	DS_vs_CTL	SoloTE-LTR13A	0.880066	FALSE	Interneuron_4	0.0919323	0.109098
0.64227	0.378313	0.05	0.027	1	DS_vs_CTL	SoloTE-MER67D	0.933273	FALSE	Interneuron_4	0.0450649	0.0673131
0.656936	0.374262	0.05	0.027	1	DS_vs_CTL	SoloTE-LTR9C	0.935393	FALSE	Interneuron_4	0.103328	0.0807964
0.931054	0.373395	0.067	0.055	1	DS_vs_CTL	SoloTE-LTR41C	0.973316	FALSE	Interneuron_4	0.11648	0.132857
0.2431	0.371448	0.143	0.082	1	DS_vs_CTL	SoloTE-MER11A	0.78038	FALSE	Interneuron_4	0.226106	0.316756
0.773888	0.362532	0.16	0.123	1	DS_vs_CTL	SoloTE-MSTC	0.935393	FALSE	Interneuron_4	0.417901	0.673413
0.192572	0.355742	0.529	0.397	1	DS_vs_CTL	SoloTE-MER2	0.758099	FALSE	Interneuron_4	2.10353	2.97195
0.531706	0.352706	0.244	0.178	1	DS_vs_CTL	SoloTE-Tigger17a	0.892258	FALSE	Interneuron_4	0.802771	1.06572
0.200726	0.35051	0.244	0.151	1	DS_vs_CTL	SoloTE-LTR49-int	0.764494	FALSE	Interneuron_4	0.554885	0.729293
0.393762	0.345839	0.454	0.356	1	DS_vs_CTL	SoloTE-AluYk2	0.854418	FALSE	Interneuron_4	1.71654	2.15274
0.423154	0.344049	0.218	0.151	1	DS_vs_CTL	SoloTE-MLT1J2	0.866727	FALSE	Interneuron_4	0.836692	1.01948
0.545026	0.341804	0.16	0.11	1	DS_vs_CTL	SoloTE-MLT2B1	0.892258	FALSE	Interneuron_4	0.28647	0.42547
0.023639	0.332647	0.975	0.918	1	DS_vs_CTL	SoloTE-AluSg7	0.319898	FALSE	Interneuron_4	12.7043	13.9756
0.655555	0.33056	0.185	0.137	1	DS_vs_CTL	SoloTE-MER57A-int	0.935393	FALSE	Interneuron_4	0.49142	0.622162
0.675116	0.321505	0.084	0.055	1	DS_vs_CTL	SoloTE-LTR16B2	0.935393	FALSE	Interneuron_4	0.108042	0.139605
0.565201	0.318171	0.235	0.178	1	DS_vs_CTL	SoloTE-HERVS71-int	0.896232	FALSE	Interneuron_4	0.234036	0.285798
0.703878	0.31526	0.269	0.219	1	DS_vs_CTL	SoloTE-MER41-int	0.935393	FALSE	Interneuron_4	0.499074	0.703045
0.676211	0.313682	0.101	0.068	1	DS_vs_CTL	SoloTE-HERVIP10B3-int	0.935393	FALSE	Interneuron_4	0.229984	0.245428
0.707015	0.310103	0.345	0.288	1	DS_vs_CTL	SoloTE-L1M6	0.935393	FALSE	Interneuron_4	1.07546	1.69337
0.788087	0.307518	0.286	0.247	1	DS_vs_CTL	SoloTE-Tigger2a	0.938104	FALSE	Interneuron_4	0.848608	1.10533
0.893809	0.303982	0.067	0.068	1	DS_vs_CTL	SoloTE-AluYe6	0.973316	FALSE	Interneuron_4	0.383466	0.354482
0.529237	0.29102	0.311	0.247	1	DS_vs_CTL	SoloTE-MLT1E2	0.892258	FALSE	Interneuron_4	0.683648	0.987433
0.840642	0.283729	0.059	0.041	1	DS_vs_CTL	SoloTE-LTR32	0.942124	FALSE	Interneuron_4	0.0841038	0.118625
0.691152	0.283001	0.16	0.123	1	DS_vs_CTL	SoloTE-HERVH48-int	0.935393	FALSE	Interneuron_4	0.2415	0.33252
0.932416	0.280726	0.067	0.055	1	DS_vs_CTL	SoloTE-MER4C	0.973316	FALSE	Interneuron_4	0.13225	0.147049
0.782036	0.276968	0.143	0.11	1	DS_vs_CTL	SoloTE-Charlie1b	0.935393	FALSE	Interneuron_4	0.80914	1.14262
0.150121	0.270805	0.613	0.479	1	DS_vs_CTL	SoloTE-L1MEi	0.732709	FALSE	Interneuron_4	1.44709	2.10421
0.203671	0.269567	0.176	0.11	1	DS_vs_CTL	SoloTE-MER90a	0.764494	FALSE	Interneuron_4	0.220353	0.279976
0.702993	0.263177	0.538	0.479	1	DS_vs_CTL	SoloTE-AluSq4	0.935393	FALSE	Interneuron_4	2.82101	3.00094
0.942516	0.262865	0.126	0.11	1	DS_vs_CTL	SoloTE-BLACKJACK	0.973316	FALSE	Interneuron_4	0.319657	0.455314
0.9649	0.253926	0.067	0.068	1	DS_vs_CTL	SoloTE-MER92-int	0.980666	FALSE	Interneuron_4	0.210533	0.270906
0.272883	0.253136	0.714	0.603	1	DS_vs_CTL	SoloTE-L1ME3Cz	0.805636	FALSE	Interneuron_4	3.07265	4.5478
0.558707	0.252076	0.613	0.534	1	DS_vs_CTL	SoloTE-MLT1C	0.892258	FALSE	Interneuron_4	2.75013	3.86929
0.805382	0.251284	0.126	0.096	1	DS_vs_CTL	SoloTE-MER77B	0.938104	FALSE	Interneuron_4	0.381145	0.476847
0.411948	0.250292	0.059	0.027	1	DS_vs_CTL	SoloTE-Arthur1A	0.860743	FALSE	Interneuron_4	0.10722	0.164458
0.42887	0.248899	0.79	0.712	1	DS_vs_CTL	SoloTE-L1MB4	0.868917	FALSE	Interneuron_4	4.26255	6.64909
0.799336	0.248869	0.202	0.164	1	DS_vs_CTL	SoloTE-HSMAR2	0.938104	FALSE	Interneuron_4	0.658448	0.979539
0.0480767	0.248674	0.37	0.247	1	DS_vs_CTL	SoloTE-Tigger3a	0.490224	FALSE	Interneuron_4	0.850236	1.36352
0.509071	0.24092	0.16	0.11	1	DS_vs_CTL	SoloTE-HERV35I-int	0.89195	FALSE	Interneuron_4	0.321968	0.355005
0.923631	0.240849	0.067	0.055	1	DS_vs_CTL	SoloTE-AluYa8	0.973316	FALSE	Interneuron_4	0.482543	0.430323
0.45584	0.232509	0.126	0.082	1	DS_vs_CTL	SoloTE-MER4E	0.884894	FALSE	Interneuron_4	0.288492	0.294668
0.340879	0.232139	0.294	0.219	1	DS_vs_CTL	SoloTE-MER20B	0.854418	FALSE	Interneuron_4	0.851428	1.18256
0.538931	0.230446	0.866	0.808	1	DS_vs_CTL	SoloTE-L1MD2	0.892258	FALSE	Interneuron_4	4.83091	7.06959
0.923894	0.227476	0.067	0.055	1	DS_vs_CTL	SoloTE-UCON78	0.973316	FALSE	Interneuron_4	0.105317	0.0966633
0.11679	0.226907	1	0.986	1	DS_vs_CTL	SoloTE-AluSc8	0.70118	FALSE	Interneuron_4	34.9828	38.0261
0.533159	0.225832	0.378	0.315	1	DS_vs_CTL	SoloTE-L3b	0.892258	FALSE	Interneuron_4	1.1513	1.77614
0.185768	0.210825	0.05	0.014	1	DS_vs_CTL	SoloTE-MER67A	0.758099	FALSE	Interneuron_4	0.0525976	0.0675172
0.957344	0.209716	0.319	0.301	1	DS_vs_CTL	SoloTE-L1MA10	0.976177	FALSE	Interneuron_4	0.981322	1.69512
0.406109	0.205572	0.126	0.082	1	DS_vs_CTL	SoloTE-LTR5-Hs	0.85627	FALSE	Interneuron_4	0.311101	0.313256
0.157334	0.197726	0.992	0.986	1	DS_vs_CTL	SoloTE-AluSq	0.732709	FALSE	Interneuron_4	29.2464	32.6396
0.00479633	0.1958	0.739	0.548	1	DS_vs_CTL	SoloTE-L1MA2	0.227957	FALSE	Interneuron_4	3.56858	6.48243
0.346853	0.192135	0.092	0.055	1	DS_vs_CTL	SoloTE-HUERS-P3-int	0.854418	FALSE	Interneuron_4	0.16603	0.177531
0.690365	0.187697	0.109	0.082	1	DS_vs_CTL	SoloTE-MER96B	0.935393	FALSE	Interneuron_4	0.227106	0.293227
0.140965	0.184883	0.118	0.055	1	DS_vs_CTL	SoloTE-LTR46	0.721386	FALSE	Interneuron_4	0.0389935	0.0736168
0.555939	0.184572	0.403	0.329	1	DS_vs_CTL	SoloTE-MER4-int	0.892258	FALSE	Interneuron_4	1.12481	1.19844
0.397962	0.181775	0.092	0.055	1	DS_vs_CTL	SoloTE-MamRep1151	0.854418	FALSE	Interneuron_4	0.180515	0.29402
0.395536	0.179967	0.059	0.027	1	DS_vs_CTL	SoloTE-L1M3b	0.854418	FALSE	Interneuron_4	0.0786522	0.0925929
0.520886	0.177184	0.748	0.671	1	DS_vs_CTL	SoloTE-L1MD1	0.892258	FALSE	Interneuron_4	3.35563	5.72151
0.191354	0.174147	0.765	0.644	1	DS_vs_CTL	SoloTE-FRAM	0.758099	FALSE	Interneuron_4	4.21324	4.39415
0.261866	0.169301	0.261	0.192	1	DS_vs_CTL	SoloTE-LTR33	0.798186	FALSE	Interneuron_4	0.646744	0.952004
0.824399	0.166908	0.118	0.096	1	DS_vs_CTL	SoloTE-Charlie24	0.942124	FALSE	Interneuron_4	0.256412	0.335144
0.968662	0.16135	0.05	0.055	1	DS_vs_CTL	SoloTE-Tigger17c	0.982884	FALSE	Interneuron_4	0.108859	0.146711
0.696674	0.161315	0.37	0.315	1	DS_vs_CTL	SoloTE-MSTD	0.935393	FALSE	Interneuron_4	1.0024	1.59056
0.392274	0.149424	0.798	0.726	1	DS_vs_CTL	SoloTE-L1PA10	0.854418	FALSE	Interneuron_4	4.3745	6.41766
0.349199	0.148086	0.252	0.192	1	DS_vs_CTL	SoloTE-THE1A	0.854418	FALSE	Interneuron_4	0.555047	0.84153
0.595027	0.146133	0.387	0.329	1	DS_vs_CTL	SoloTE-Tigger2	0.907125	FALSE	Interneuron_4	1.41416	1.95067
0.740751	0.145388	0.143	0.11	1	DS_vs_CTL	SoloTE-MLT2A1	0.935393	FALSE	Interneuron_4	0.295192	0.398634
0.81194	0.144701	0.748	0.74	1	DS_vs_CTL	SoloTE-L1ME3A	0.941076	FALSE	Interneuron_4	4.42598	6.7247
0.840558	0.140324	0.134	0.11	1	DS_vs_CTL	SoloTE-L1M3f	0.942124	FALSE	Interneuron_4	0.211827	0.346428
0.194451	0.137622	0.714	0.603	1	DS_vs_CTL	SoloTE-L1ME3	0.760681	FALSE	Interneuron_4	2.89402	4.39091
0.802249	0.135842	0.58	0.534	1	DS_vs_CTL	SoloTE-L1MB1	0.938104	FALSE	Interneuron_4	1.99731	3.43557
0.630192	0.133168	0.05	0.027	1	DS_vs_CTL	SoloTE-Tigger14a	0.933273	FALSE	Interneuron_4	0.134869	0.185495
0.942906	0.126707	0.21	0.219	1	DS_vs_CTL	SoloTE-L1M7	0.973316	FALSE	Interneuron_4	0.8512	1.28121
0.462951	0.123041	0.353	0.288	1	DS_vs_CTL	SoloTE-HAL1b	0.884894	FALSE	Interneuron_4	0.932221	1.37387
0.331857	0.120756	0.176	0.123	1	DS_vs_CTL	SoloTE-MER2B	0.854418	FALSE	Interneuron_4	0.393456	0.503701
0.495085	0.12019	0.689	0.616	1	DS_vs_CTL	SoloTE-Tigger3b	0.884894	FALSE	Interneuron_4	3.18241	3.91064
0.630405	0.119385	0.966	0.959	1	DS_vs_CTL	SoloTE-AluSx4	0.933273	FALSE	Interneuron_4	16.4275	18.2692
0.466827	0.119173	1	1	1	DS_vs_CTL	SoloTE-AluSg	0.884894	FALSE	Interneuron_4	52.9186	57.7848
0.769254	0.117811	0.151	0.123	1	DS_vs_CTL	SoloTE-MER4E1	0.935393	FALSE	Interneuron_4	0.360474	0.472261
0.340288	0.113291	0.395	0.329	1	DS_vs_CTL	SoloTE-Charlie4z	0.854418	FALSE	Interneuron_4	1.12456	1.42487
0.641095	0.112567	0.143	0.11	1	DS_vs_CTL	SoloTE-MER21A	0.933273	FALSE	Interneuron_4	0.389737	0.475646
0.180443	0.10887	0.731	0.63	1	DS_vs_CTL	SoloTE-L1MA7	0.758099	FALSE	Interneuron_4	2.58821	4.09368
0.282361	0.108015	0.723	0.616	1	DS_vs_CTL	SoloTE-L1M2	0.805636	FALSE	Interneuron_4	3.92321	5.39488
0.556995	0.105934	0.05	0.027	1	DS_vs_CTL	SoloTE-PABL-A	0.892258	FALSE	Interneuron_4	0.120422	0.142606
0.138689	0.10421	0.538	0.438	1	DS_vs_CTL	SoloTE-HERVH-int	0.721386	FALSE	Interneuron_4	2.37606	2.47737
0.941693	0.101362	0.05	0.041	1	DS_vs_CTL	SoloTE-MER4A	0.973316	FALSE	Interneuron_4	0.196321	0.238551
0.0314827	0.0999411	0.714	0.562	1	DS_vs_CTL	SoloTE-L1MD	0.376582	FALSE	Interneuron_4	3.33213	4.14098
0.0522892	0.0991383	0.479	0.356	1	DS_vs_CTL	SoloTE-L1PB2	0.508186	FALSE	Interneuron_4	1.41635	1.8564
0.672443	0.096394	0.95	0.918	1	DS_vs_CTL	SoloTE-L1MC4	0.935393	FALSE	Interneuron_4	9.46729	14.4133
0.85835	0.0949098	0.269	0.247	1	DS_vs_CTL	SoloTE-MER101-int	0.958517	FALSE	Interneuron_4	0.55279	0.702967
0.735642	0.0924702	1	1	1	DS_vs_CTL	SoloTE-AluSc	0.935393	FALSE	Interneuron_4	49.7449	54.5234
0.917112	0.0877846	0.067	0.055	1	DS_vs_CTL	SoloTE-MER92B	0.973316	FALSE	Interneuron_4	0.124766	0.173202
0.993751	0.0874408	0.101	0.096	1	DS_vs_CTL	SoloTE-Charlie29a	0.993751	FALSE	Interneuron_4	0.32753	0.439973
0.639469	0.086671	0.471	0.425	1	DS_vs_CTL	SoloTE-AluYk4	0.933273	FALSE	Interneuron_4	1.84764	1.95631
0.190909	0.0835093	0.084	0.041	1	DS_vs_CTL	SoloTE-MER67C	0.758099	FALSE	Interneuron_4	0.231153	0.272678
0.794299	0.0833834	0.059	0.068	1	DS_vs_CTL	SoloTE-MamGypLTR1a	0.938104	FALSE	Interneuron_4	0.0634975	0.0854025
0.388365	0.0817186	0.824	0.74	1	DS_vs_CTL	SoloTE-L1MDa	0.854418	FALSE	Interneuron_4	4.66717	5.46021
0.821618	0.0813264	0.101	0.082	1	DS_vs_CTL	SoloTE-Charlie16a	0.942124	FALSE	Interneuron_4	0.222019	0.309655
0.310855	0.0798083	0.126	0.082	1	DS_vs_CTL	SoloTE-Chap1-Mam	0.830556	FALSE	Interneuron_4	0.14911	0.205483
0.73506	0.0772365	0.134	0.11	1	DS_vs_CTL	SoloTE-Arthur1B	0.935393	FALSE	Interneuron_4	0.307488	0.422844
0.247894	0.0637036	0.597	0.507	1	DS_vs_CTL	SoloTE-L1MC	0.78038	FALSE	Interneuron_4	2.32513	3.11464
0.773629	0.0600538	0.933	0.904	1	DS_vs_CTL	SoloTE-L1MEc	0.935393	FALSE	Interneuron_4	8.32909	12.9172
0.245477	0.0520966	0.605	0.507	1	DS_vs_CTL	SoloTE-L1ME2z	0.78038	FALSE	Interneuron_4	2.72539	3.99764
0.773855	0.0520906	0.076	0.055	1	DS_vs_CTL	SoloTE-MamGypLTR3	0.935393	FALSE	Interneuron_4	0.140174	0.149994
0.27585	0.0511599	0.756	0.671	1	DS_vs_CTL	SoloTE-MER5A	0.805636	FALSE	Interneuron_4	4.21348	5.77595
0.924001	0.0466784	0.782	0.795	1	DS_vs_CTL	SoloTE-L1ME4b	0.973316	FALSE	Interneuron_4	6.10966	8.50414
0.985152	0.0460282	1	1	1	DS_vs_CTL	SoloTE-AluSz	0.990909	FALSE	Interneuron_4	132.869	148.245
0.894182	0.0456171	1	1	1	DS_vs_CTL	SoloTE-AluY	0.973316	FALSE	Interneuron_4	194.888	202.255
0.556563	0.0443092	0.681	0.616	1	DS_vs_CTL	SoloTE-MSTA	0.892258	FALSE	Interneuron_4	2.80255	3.88109
0.576643	0.0443007	0.387	0.329	1	DS_vs_CTL	SoloTE-MLT1H	0.89668	FALSE	Interneuron_4	0.980501	1.26372
0.925975	0.0426418	1	1	1	DS_vs_CTL	SoloTE-AluJb	0.973316	FALSE	Interneuron_4	115.367	130.694
0.755869	0.0425702	1	1	1	DS_vs_CTL	SoloTE-AluSq2	0.935393	FALSE	Interneuron_4	79.6857	86.6684
0.487428	0.0388037	1	0.986	1	DS_vs_CTL	SoloTE-AluSx3	0.884894	FALSE	Interneuron_4	38.8975	43.156
0.799448	0.0369391	0.101	0.082	1	DS_vs_CTL	SoloTE-MER49	0.938104	FALSE	Interneuron_4	0.192686	0.218901
0.725499	0.0361532	0.924	0.904	1	DS_vs_CTL	SoloTE-AluSg4	0.935393	FALSE	Interneuron_4	10.3445	11.3836
0.804439	0.0327647	0.084	0.068	1	DS_vs_CTL	SoloTE-MER58D	0.938104	FALSE	Interneuron_4	0.175188	0.197042
0.224263	0.0272137	0.807	0.726	1	DS_vs_CTL	SoloTE-L1PREC2	0.768723	FALSE	Interneuron_4	3.67077	5.50929
0.936169	0.0270443	0.866	0.849	1	DS_vs_CTL	SoloTE-Tigger1	0.973316	FALSE	Interneuron_4	6.52378	8.70001
0.93512	0.0243435	0.126	0.137	1	DS_vs_CTL	SoloTE-MER68	0.973316	FALSE	Interneuron_4	0.409658	0.608985
0.829193	0.0232594	1	1	1	DS_vs_CTL	SoloTE-L2a	0.942124	FALSE	Interneuron_4	33.4097	52.634
0.954238	0.0220939	1	1	1	DS_vs_CTL	SoloTE-AluSx	0.974608	FALSE	Interneuron_4	152.018	165.188
0.712637	0.0206176	0.252	0.219	1	DS_vs_CTL	SoloTE-MSTB1	0.935393	FALSE	Interneuron_4	0.705828	0.998308
0.0149693	0.0171434	0.79	0.63	1	DS_vs_CTL	SoloTE-L1MB2	0.297009	FALSE	Interneuron_4	3.88423	6.40301
0.63221	0.015212	0.126	0.096	1	DS_vs_CTL	SoloTE-HERV17-int	0.933273	FALSE	Interneuron_4	0.243114	0.375493
0.459277	0.0145473	0.303	0.26	1	DS_vs_CTL	SoloTE-L4-A-Mam	0.884894	FALSE	Interneuron_4	0.934108	1.36862
0.215373	0.0126652	0.538	0.438	1	DS_vs_CTL	SoloTE-L1PB3	0.768723	FALSE	Interneuron_4	1.31327	2.1872
0.717231	0.0100057	0.319	0.288	1	DS_vs_CTL	SoloTE-Tigger4a	0.935393	FALSE	Interneuron_4	1.07872	1.4932
0.976941	0.0090603	1	1	1	DS_vs_CTL	SoloTE-AluSp	0.98806	FALSE	Interneuron_4	81.4726	89.2272
0.51801	0.00690454	0.067	0.041	1	DS_vs_CTL	SoloTE-LTR16	0.892258	FALSE	Interneuron_4	0.113488	0.187228
0.0159027	0.00217217	0.471	0.342	1	DS_vs_CTL	SoloTE-L1PA8A	0.299743	FALSE	Interneuron_4	1.31199	2.36171
0.0133375	0.00172295	0.798	0.63	1	DS_vs_CTL	SoloTE-AluYc	0.297009	FALSE	Interneuron_4	5.4862	5.81515
0.148112	-0.000147468	0.815	0.712	1	DS_vs_CTL	SoloTE-L1ME2	0.732709	FALSE	Interneuron_4	4.39628	7.13742
0.927202	-0.000804421	0.134	0.123	1	DS_vs_CTL	SoloTE-MamRep38	0.973316	FALSE	Interneuron_4	0.313631	0.40109
0.491479	-0.0032638	1	0.986	1	DS_vs_CTL	SoloTE-MIR	0.884894	FALSE	Interneuron_4	20.7015	29.6986
0.0189283	-0.00480856	0.849	0.712	1	DS_vs_CTL	SoloTE-L1M1	0.319898	FALSE	Interneuron_4	4.49795	6.0116
0.98613	-0.00661663	0.899	0.904	1	DS_vs_CTL	SoloTE-MIR3	0.990909	FALSE	Interneuron_4	7.97055	11.2343
0.586766	-0.0122857	0.429	0.479	1	DS_vs_CTL	SoloTE-L1MD3	0.896728	FALSE	Interneuron_4	1.59025	2.24883
0.482757	-0.0124529	0.067	0.041	1	DS_vs_CTL	SoloTE-MER74B	0.884894	FALSE	Interneuron_4	0.12656	0.194948
0.163166	-0.0139476	0.521	0.438	1	DS_vs_CTL	SoloTE-L1ME4c	0.732709	FALSE	Interneuron_4	1.92515	2.83934
0.177627	-0.0145786	0.899	0.822	1	DS_vs_CTL	SoloTE-L1MC5a	0.758099	FALSE	Interneuron_4	7.00684	10.026
0.660492	-0.0151927	0.101	0.082	1	DS_vs_CTL	SoloTE-Charlie15a	0.935393	FALSE	Interneuron_4	0.2954	0.422985
0.808702	-0.0161298	0.874	0.89	1	DS_vs_CTL	SoloTE-L3	0.940211	FALSE	Interneuron_4	6.94463	10.7018
0.703311	-0.0169795	0.059	0.041	1	DS_vs_CTL	SoloTE-LTR76	0.935393	FALSE	Interneuron_4	0.0992956	0.110268
0.914635	-0.0221925	0.118	0.11	1	DS_vs_CTL	SoloTE-Charlie10	0.973316	FALSE	Interneuron_4	0.280648	0.347233
0.0548457	-0.0275747	0.597	0.479	1	DS_vs_CTL	SoloTE-FAM	0.51688	FALSE	Interneuron_4	2.2917	2.51663
0.901991	-0.0330282	0.269	0.26	1	DS_vs_CTL	SoloTE-MER21B	0.973316	FALSE	Interneuron_4	0.621872	0.961212
0.30394	-0.0337106	0.966	0.932	1	DS_vs_CTL	SoloTE-L2b	0.829171	FALSE	Interneuron_4	13.1462	20.7618
0.11072	-0.0361547	0.84	0.767	1	DS_vs_CTL	SoloTE-L1MEd	0.689961	FALSE	Interneuron_4	6.59295	9.71909
0.939454	-0.0378528	0.134	0.123	1	DS_vs_CTL	SoloTE-MSTB-int	0.973316	FALSE	Interneuron_4	0.182822	0.268606
0.983964	-0.0386298	0.319	0.315	1	DS_vs_CTL	SoloTE-MLT1A1	0.990909	FALSE	Interneuron_4	1.04259	1.25546
0.353163	-0.0435598	0.101	0.068	1	DS_vs_CTL	SoloTE-Kanga2-a	0.854418	FALSE	Interneuron_4	0.540453	0.606934
0.860228	-0.0456433	0.345	0.384	1	DS_vs_CTL	SoloTE-MSTB	0.958892	FALSE	Interneuron_4	1.28095	1.72497
0.292134	-0.0508299	0.42	0.356	1	DS_vs_CTL	SoloTE-Alu	0.821396	FALSE	Interneuron_4	1.54565	1.56221
0.201329	-0.0513311	0.202	0.137	1	DS_vs_CTL	SoloTE-MER46C	0.764494	FALSE	Interneuron_4	0.380881	0.596985
0.838821	-0.0517626	0.706	0.74	1	DS_vs_CTL	SoloTE-L1ME3G	0.942124	FALSE	Interneuron_4	4.11562	6.00776
0.26464	-0.0520376	0.311	0.26	1	DS_vs_CTL	SoloTE-MLT2B4	0.798186	FALSE	Interneuron_4	0.640626	0.834738
0.022738	-0.0537895	1	0.959	1	DS_vs_CTL	SoloTE-L2c	0.319898	FALSE	Interneuron_4	21.3678	34.3931
0.197901	-0.0542101	1	0.986	1	DS_vs_CTL	SoloTE-AluSz6	0.764494	FALSE	Interneuron_4	52.8738	60.3358
0.481712	-0.0554683	0.958	0.932	1	DS_vs_CTL	SoloTE-L1MB7	0.884894	FALSE	Interneuron_4	10.5498	16.4218
0.779786	-0.056347	0.235	0.219	1	DS_vs_CTL	SoloTE-Charlie8	0.935393	FALSE	Interneuron_4	0.724304	0.930808
0.0198601	-0.0574844	0.849	0.74	1	DS_vs_CTL	SoloTE-L1MEg	0.319898	FALSE	Interneuron_4	5.84549	8.39954
0.437622	-0.0579113	0.286	0.233	1	DS_vs_CTL	SoloTE-MER103C	0.878919	FALSE	Interneuron_4	0.857053	1.31118
0.735019	-0.0600967	1	1	1	DS_vs_CTL	SoloTE-AluJr	0.935393	FALSE	Interneuron_4	65.0634	72.5239
0.290165	-0.065046	0.966	0.945	1	DS_vs_CTL	SoloTE-L2	0.821396	FALSE	Interneuron_4	12.2359	20.428
0.832688	-0.0669231	1	1	1	DS_vs_CTL	SoloTE-AluJo	0.942124	FALSE	Interneuron_4	59.3541	65.8885
0.0362568	-0.0676406	0.504	0.411	1	DS_vs_CTL	SoloTE-HAL1ME	0.410032	FALSE	Interneuron_4	1.90599	2.92631
0.00281852	-0.0677093	0.487	0.356	1	DS_vs_CTL	SoloTE-L1ME3E	0.159374	FALSE	Interneuron_4	1.26895	1.95196
0.82723	-0.0704921	0.975	0.986	1	DS_vs_CTL	SoloTE-L1M5	0.942124	FALSE	Interneuron_4	14.9359	20.0054
0.783505	-0.0707489	0.521	0.548	1	DS_vs_CTL	SoloTE-MER5A1	0.935393	FALSE	Interneuron_4	1.73886	2.56971
0.649722	-0.0722304	0.244	0.288	1	DS_vs_CTL	SoloTE-Plat-L3	0.935393	FALSE	Interneuron_4	0.505001	0.65149
0.265634	-0.0726713	0.084	0.041	1	DS_vs_CTL	SoloTE-L5	0.798186	FALSE	Interneuron_4	0.168676	0.184983
0.0941459	-0.0736174	0.79	0.699	1	DS_vs_CTL	SoloTE-L1MA4	0.660514	FALSE	Interneuron_4	4.20235	7.51484
0.731796	-0.075567	1	1	1	DS_vs_CTL	SoloTE-AluSx1	0.935393	FALSE	Interneuron_4	157.501	172.969
0.993737	-0.0771965	0.067	0.068	1	DS_vs_CTL	SoloTE-MamRep4096	0.993751	FALSE	Interneuron_4	0.163392	0.186037
0.671918	-0.0788115	0.126	0.11	1	DS_vs_CTL	SoloTE-MER34	0.935393	FALSE	Interneuron_4	0.258305	0.302567
0.764281	-0.080379	0.824	0.795	1	DS_vs_CTL	SoloTE-FLAM-A	0.935393	FALSE	Interneuron_4	5.46301	6.03799
0.989452	-0.0825839	0.168	0.164	1	DS_vs_CTL	SoloTE-MLT1J1	0.992644	FALSE	Interneuron_4	0.332393	0.518483
0.298449	-0.0849367	0.714	0.699	1	DS_vs_CTL	SoloTE-L1MA8	0.821396	FALSE	Interneuron_4	3.4235	5.23831
0.0955727	-0.0855284	0.714	0.63	1	DS_vs_CTL	SoloTE-THE1B	0.660514	FALSE	Interneuron_4	3.99338	5.15998
0.886943	-0.0858629	0.05	0.041	1	DS_vs_CTL	SoloTE-LTR52	0.972978	FALSE	Interneuron_4	0.115389	0.184328
0.797218	-0.0885965	0.706	0.726	1	DS_vs_CTL	SoloTE-L1MC4a	0.938104	FALSE	Interneuron_4	3.45157	5.71215
0.974351	-0.0886061	0.235	0.247	1	DS_vs_CTL	SoloTE-THE1B-int	0.987046	FALSE	Interneuron_4	0.923728	1.46537
0.872861	-0.0917749	0.765	0.781	1	DS_vs_CTL	SoloTE-L1MB5	0.967771	FALSE	Interneuron_4	4.05285	6.14001
0.361134	-0.0959314	0.647	0.603	1	DS_vs_CTL	SoloTE-L1MC2	0.854418	FALSE	Interneuron_4	3.24506	4.94581
0.371156	-0.0983678	0.958	0.973	1	DS_vs_CTL	SoloTE-L1PA7	0.854418	FALSE	Interneuron_4	10.1212	17.6726
0.716335	-0.101463	0.866	0.849	1	DS_vs_CTL	SoloTE-L1ME4a	0.935393	FALSE	Interneuron_4	7.29982	10.4188
0.0014058	-0.102578	0.345	0.233	1	DS_vs_CTL	SoloTE-L4-C-Mam	0.10481	FALSE	Interneuron_4	0.805203	1.09771
0.983586	-0.103365	0.235	0.247	1	DS_vs_CTL	SoloTE-L1ME3C	0.990909	FALSE	Interneuron_4	0.846141	1.26554
0.611566	-0.107189	0.941	0.959	1	DS_vs_CTL	SoloTE-FLAM-C	0.921051	FALSE	Interneuron_4	13.7188	14.5199
0.402483	-0.110122	0.084	0.055	1	DS_vs_CTL	SoloTE-MSTB2	0.854418	FALSE	Interneuron_4	0.174476	0.255032
0.759776	-0.11054	0.328	0.315	1	DS_vs_CTL	SoloTE-L1PBa	0.935393	FALSE	Interneuron_4	0.989582	1.28141
0.659454	-0.111555	0.588	0.589	1	DS_vs_CTL	SoloTE-L1PA17	0.935393	FALSE	Interneuron_4	2.46421	3.77998
0.721403	-0.113313	0.067	0.055	1	DS_vs_CTL	SoloTE-Charlie21a	0.935393	FALSE	Interneuron_4	0.218371	0.280452
0.380232	-0.114122	0.983	1	1	DS_vs_CTL	SoloTE-MIRb	0.854418	FALSE	Interneuron_4	24.669	35.1648
0.0138195	-0.114124	0.613	0.466	1	DS_vs_CTL	SoloTE-AluYf1	0.297009	FALSE	Interneuron_4	3.02719	3.09015
0.257576	-0.115128	0.605	0.562	1	DS_vs_CTL	SoloTE-MER3	0.79313	FALSE	Interneuron_4	2.03512	2.62326
0.00151655	-0.116556	0.899	0.767	1	DS_vs_CTL	SoloTE-L1PA16	0.10481	FALSE	Interneuron_4	5.68962	10.1279
0.948563	-0.122089	0.092	0.096	1	DS_vs_CTL	SoloTE-MER113A	0.974418	FALSE	Interneuron_4	0.20873	0.306524
0.672092	-0.122919	0.319	0.315	1	DS_vs_CTL	SoloTE-Tigger19b	0.935393	FALSE	Interneuron_4	1.15607	1.34299
0.190186	-0.122988	0.798	0.712	1	DS_vs_CTL	SoloTE-AluYj4	0.758099	FALSE	Interneuron_4	4.99139	4.8426
0.311757	-0.124094	0.092	0.055	1	DS_vs_CTL	SoloTE-LTR8A	0.830556	FALSE	Interneuron_4	0.17861	0.226365
0.455902	-0.129442	0.622	0.589	1	DS_vs_CTL	SoloTE-Charlie1a	0.884894	FALSE	Interneuron_4	2.97635	3.75921
0.148031	-0.131316	0.16	0.11	1	DS_vs_CTL	SoloTE-Zaphod3	0.732709	FALSE	Interneuron_4	0.137711	0.187252
0.636842	-0.136821	0.941	0.945	1	DS_vs_CTL	SoloTE-L1M4	0.933273	FALSE	Interneuron_4	9.19328	12.1381
0.151186	-0.142128	0.824	0.795	1	DS_vs_CTL	SoloTE-L1MB3	0.732709	FALSE	Interneuron_4	6.85782	11.7936
0.881442	-0.144079	0.05	0.041	1	DS_vs_CTL	SoloTE-LOR1b	0.970968	FALSE	Interneuron_4	0.111092	0.149292
0.0121852	-0.145481	0.874	0.781	1	DS_vs_CTL	SoloTE-AluYb8	0.297009	FALSE	Interneuron_4	6.15294	5.90894
0.462107	-0.148667	0.244	0.219	1	DS_vs_CTL	SoloTE-AluYi6	0.884894	FALSE	Interneuron_4	0.742693	0.727157
0.0734702	-0.148957	0.101	0.055	1	DS_vs_CTL	SoloTE-MamGyp-int	0.601296	FALSE	Interneuron_4	0.120612	0.17886
0.461507	-0.152534	0.151	0.123	1	DS_vs_CTL	SoloTE-HERVK-int	0.884894	FALSE	Interneuron_4	0.358767	0.499296
0.716158	-0.153415	0.059	0.041	1	DS_vs_CTL	SoloTE-HERVIP10F-int	0.935393	FALSE	Interneuron_4	0.104722	0.156402
0.771347	-0.157	0.168	0.205	1	DS_vs_CTL	SoloTE-MamRep605	0.935393	FALSE	Interneuron_4	0.449045	0.703375
0.776314	-0.157344	0.571	0.589	1	DS_vs_CTL	SoloTE-L1MA4A	0.935393	FALSE	Interneuron_4	2.6354	4.78142
0.836091	-0.157717	0.16	0.151	1	DS_vs_CTL	SoloTE-LTR40a	0.942124	FALSE	Interneuron_4	0.244894	0.350155
0.689971	-0.159192	0.218	0.205	1	DS_vs_CTL	SoloTE-MER41A	0.935393	FALSE	Interneuron_4	0.89402	0.931704
0.732296	-0.161844	0.882	0.877	1	DS_vs_CTL	SoloTE-AluYm1	0.935393	FALSE	Interneuron_4	8.82938	9.08026
0.348605	-0.162528	0.37	0.356	1	DS_vs_CTL	SoloTE-L1M4a1	0.854418	FALSE	Interneuron_4	1.17535	1.62632
0.559277	-0.163297	0.252	0.247	1	DS_vs_CTL	SoloTE-Harlequin-int	0.892258	FALSE	Interneuron_4	0.892636	0.819095
0.0615062	-0.16561	0.235	0.178	1	DS_vs_CTL	SoloTE-MLT1G3	0.538829	FALSE	Interneuron_4	0.749706	0.876738
0.614294	-0.169507	0.689	0.712	1	DS_vs_CTL	SoloTE-L1MCa	0.922924	FALSE	Interneuron_4	3.33096	4.72708
0.235648	-0.170864	0.286	0.247	1	DS_vs_CTL	SoloTE-MamRTE1	0.78038	FALSE	Interneuron_4	1.1084	1.74805
0.387484	-0.170953	0.731	0.767	1	DS_vs_CTL	SoloTE-L1PA8	0.854418	FALSE	Interneuron_4	4.53595	7.5676
0.40505	-0.172626	0.345	0.315	1	DS_vs_CTL	SoloTE-MLT1I	0.85627	FALSE	Interneuron_4	1.05931	1.53366
0.395304	-0.172712	0.067	0.041	1	DS_vs_CTL	SoloTE-MER34-int	0.854418	FALSE	Interneuron_4	0.139743	0.143217
0.605079	-0.175726	0.622	0.685	1	DS_vs_CTL	SoloTE-AluYh3	0.913493	FALSE	Interneuron_4	3.28127	3.63502
0.943584	-0.175995	0.067	0.068	1	DS_vs_CTL	SoloTE-MER34B-int	0.973316	FALSE	Interneuron_4	0.230153	0.232835
0.774423	-0.176233	0.076	0.068	1	DS_vs_CTL	SoloTE-LTR12E	0.935393	FALSE	Interneuron_4	0.188335	0.135103
0.522926	-0.180666	0.269	0.219	1	DS_vs_CTL	SoloTE-LTR12C	0.892258	FALSE	Interneuron_4	0.567307	0.643458
0.497191	-0.184548	0.143	0.11	1	DS_vs_CTL	SoloTE-Zaphod	0.886112	FALSE	Interneuron_4	0.285329	0.342767
0.6852	-0.185305	0.109	0.096	1	DS_vs_CTL	SoloTE-LTR5B	0.935393	FALSE	Interneuron_4	0.3497	0.361298
0.642025	-0.185311	0.084	0.068	1	DS_vs_CTL	SoloTE-MER31A	0.933273	FALSE	Interneuron_4	0.186918	0.251644
0.949891	-0.188253	0.109	0.123	1	DS_vs_CTL	SoloTE-MER104	0.974418	FALSE	Interneuron_4	0.340805	0.447194
0.0256055	-0.189907	0.958	0.904	1	DS_vs_CTL	SoloTE-MIRc	0.325033	FALSE	Interneuron_4	10.9274	15.4738
0.777046	-0.198805	0.782	0.795	1	DS_vs_CTL	SoloTE-L1MA3	0.935393	FALSE	Interneuron_4	4.77854	8.09659
0.813985	-0.199743	0.076	0.068	1	DS_vs_CTL	SoloTE-LTR49	0.941076	FALSE	Interneuron_4	0.21008	0.263053
0.461222	-0.201952	0.874	0.863	1	DS_vs_CTL	SoloTE-AluYa5	0.884894	FALSE	Interneuron_4	8.87736	9.16109
0.864014	-0.202251	0.151	0.164	1	DS_vs_CTL	SoloTE-L1MCb	0.959672	FALSE	Interneuron_4	0.425126	0.558034
0.922519	-0.204568	0.118	0.123	1	DS_vs_CTL	SoloTE-LTR78B	0.973316	FALSE	Interneuron_4	0.27988	0.398482
0.834642	-0.206234	0.193	0.205	1	DS_vs_CTL	SoloTE-MER65-int	0.942124	FALSE	Interneuron_4	0.541008	0.613814
0.747048	-0.206826	0.252	0.274	1	DS_vs_CTL	SoloTE-MER39	0.935393	FALSE	Interneuron_4	0.686575	0.754608
0.963408	-0.207341	0.05	0.055	1	DS_vs_CTL	SoloTE-MLT1F2-int	0.980666	FALSE	Interneuron_4	0.244959	0.195277
0.772181	-0.212283	0.193	0.192	1	DS_vs_CTL	SoloTE-Charlie2a	0.935393	FALSE	Interneuron_4	0.644352	0.788803
0.242731	-0.21704	0.941	0.918	1	DS_vs_CTL	SoloTE-AluSc5	0.78038	FALSE	Interneuron_4	9.97114	10.7813
0.882377	-0.224933	0.16	0.178	1	DS_vs_CTL	SoloTE-MER74A	0.970968	FALSE	Interneuron_4	0.464549	0.683625
0.277026	-0.229247	0.706	0.808	1	DS_vs_CTL	SoloTE-MLT1D	0.805636	FALSE	Interneuron_4	3.46541	4.5309
0.799326	-0.229654	0.328	0.37	1	DS_vs_CTL	SoloTE-MER21C	0.938104	FALSE	Interneuron_4	1.15627	1.6344
0.928907	-0.233172	0.092	0.11	1	DS_vs_CTL	SoloTE-MER50	0.973316	FALSE	Interneuron_4	0.432828	0.536031
0.836979	-0.234158	0.445	0.479	1	DS_vs_CTL	SoloTE-L1MA6	0.942124	FALSE	Interneuron_4	1.75047	3.17345
0.779312	-0.237427	0.176	0.178	1	DS_vs_CTL	SoloTE-L1MEj	0.935393	FALSE	Interneuron_4	0.511899	0.855615
0.252538	-0.238368	0.832	0.904	1	DS_vs_CTL	SoloTE-HAL1	0.785392	FALSE	Interneuron_4	8.03312	12.9386
0.22918	-0.244341	0.227	0.205	1	DS_vs_CTL	SoloTE-MLT1O	0.776638	FALSE	Interneuron_4	0.425957	0.633927
0.312497	-0.244469	0.815	0.877	1	DS_vs_CTL	SoloTE-L1MC5	0.830556	FALSE	Interneuron_4	6.4992	9.17715
0.776748	-0.247605	0.378	0.425	1	DS_vs_CTL	SoloTE-L1P4	0.935393	FALSE	Interneuron_4	1.31775	1.7105
0.527943	-0.25479	0.479	0.534	1	DS_vs_CTL	SoloTE-AluSq10	0.892258	FALSE	Interneuron_4	2.34918	2.44734
0.220687	-0.254933	0.866	0.863	1	DS_vs_CTL	SoloTE-L1MB8	0.768723	FALSE	Interneuron_4	7.0022	10.2539
0.110325	-0.256523	0.681	0.671	1	DS_vs_CTL	SoloTE-MER20	0.689961	FALSE	Interneuron_4	2.66442	3.96409
0.248417	-0.257075	0.849	0.877	1	DS_vs_CTL	SoloTE-L1PB1	0.78038	FALSE	Interneuron_4	6.4654	9.56617
0.937945	-0.258279	0.076	0.068	1	DS_vs_CTL	SoloTE-MER57A1	0.973316	FALSE	Interneuron_4	0.191186	0.249068
0.877417	-0.258925	0.109	0.123	1	DS_vs_CTL	SoloTE-MLT2A2	0.970968	FALSE	Interneuron_4	0.257904	0.35158
0.000468656	-0.259859	0.992	0.918	0.507086	DS_vs_CTL	SoloTE-L1ME1	0.0583008	FALSE	Interneuron_4	11.7908	18.7876
0.00257409	-0.264226	0.992	0.945	1	DS_vs_CTL	SoloTE-AluJr4	0.159374	FALSE	Interneuron_4	15.1956	17.0374
0.107293	-0.266367	0.143	0.068	1	DS_vs_CTL	SoloTE-HERVK9-int	0.689961	FALSE	Interneuron_4	0.390456	0.466287
0.33908	-0.268142	0.168	0.151	1	DS_vs_CTL	SoloTE-MER41B	0.854418	FALSE	Interneuron_4	0.572589	0.705249
0.689449	-0.268358	0.076	0.068	1	DS_vs_CTL	SoloTE-MER57E3	0.935393	FALSE	Interneuron_4	0.228659	0.232758
0.222242	-0.270239	0.185	0.151	1	DS_vs_CTL	SoloTE-HERVL-int	0.768723	FALSE	Interneuron_4	0.355042	0.560046
0.934092	-0.271513	0.067	0.068	1	DS_vs_CTL	SoloTE-LFSINE-Vert	0.973316	FALSE	Interneuron_4	0.184061	0.311056
0.907978	-0.279097	0.092	0.11	1	DS_vs_CTL	SoloTE-MER115	0.973316	FALSE	Interneuron_4	0.178161	0.285257
0.757876	-0.281927	0.076	0.068	1	DS_vs_CTL	SoloTE-LTR37A	0.935393	FALSE	Interneuron_4	0.211001	0.282867
0.035128	-0.286131	0.462	0.411	1	DS_vs_CTL	SoloTE-MLT1J	0.404622	FALSE	Interneuron_4	1.78782	2.48318
0.938131	-0.286257	0.05	0.055	1	DS_vs_CTL	SoloTE-LTR2C	0.973316	FALSE	Interneuron_4	0.0628761	0.065023
0.402435	-0.288569	0.79	0.822	1	DS_vs_CTL	SoloTE-L1MEf	0.854418	FALSE	Interneuron_4	4.73008	6.94582
0.139817	-0.288905	0.496	0.507	1	DS_vs_CTL	SoloTE-L1MA5	0.721386	FALSE	Interneuron_4	1.71533	3.0412
0.395978	-0.292117	0.319	0.342	1	DS_vs_CTL	SoloTE-MLT1F	0.854418	FALSE	Interneuron_4	0.846538	1.04629
0.782878	-0.293446	0.126	0.123	1	DS_vs_CTL	SoloTE-MER72B	0.935393	FALSE	Interneuron_4	0.123862	0.0738831
0.128738	-0.293729	0.395	0.356	1	DS_vs_CTL	SoloTE-L1P2	0.721386	FALSE	Interneuron_4	1.17955	1.35182
0.88355	-0.298039	0.084	0.096	1	DS_vs_CTL	SoloTE-L1M3d	0.970968	FALSE	Interneuron_4	0.0952977	0.125099
0.735348	-0.298655	0.05	0.041	1	DS_vs_CTL	SoloTE-LTR16E2	0.935393	FALSE	Interneuron_4	0.109368	0.187843
0.828324	-0.298725	0.118	0.11	1	DS_vs_CTL	SoloTE-HERV4-I-int	0.942124	FALSE	Interneuron_4	0.311635	0.348292
0.505643	-0.300118	0.059	0.041	1	DS_vs_CTL	SoloTE-Tigger16b	0.889234	FALSE	Interneuron_4	0.172434	0.342406
0.0806845	-0.300187	0.21	0.164	1	DS_vs_CTL	SoloTE-L1M3c	0.61672	FALSE	Interneuron_4	0.377382	0.456593
0.0152802	-0.300835	0.563	0.507	1	DS_vs_CTL	SoloTE-L1M3	0.297009	FALSE	Interneuron_4	2.28777	3.06171
0.643688	-0.304691	0.176	0.178	1	DS_vs_CTL	SoloTE-MER31-int	0.933273	FALSE	Interneuron_4	0.395781	0.422483
0.0826271	-0.31048	0.849	0.836	1	DS_vs_CTL	SoloTE-L1MC1	0.61672	FALSE	Interneuron_4	6.15815	10.972
0.573494	-0.313089	0.202	0.219	1	DS_vs_CTL	SoloTE-L1MEb	0.89668	FALSE	Interneuron_4	0.564729	0.840156
0.492572	-0.314359	0.479	0.507	1	DS_vs_CTL	SoloTE-L1PA14	0.884894	FALSE	Interneuron_4	1.86671	3.1732
0.952486	-0.314833	0.05	0.055	1	DS_vs_CTL	SoloTE-Kanga1	0.974418	FALSE	Interneuron_4	0.139971	0.187381
0.0576094	-0.316993	0.849	0.89	1	DS_vs_CTL	SoloTE-L1PA6	0.520053	FALSE	Interneuron_4	5.3977	9.12062
0.466974	-0.317239	0.025	0.055	1	DS_vs_CTL	SoloTE-MLT1J2-int	0.884894	FALSE	Interneuron_4	0.0666881	0.139142
0.924133	-0.317514	0.084	0.096	1	DS_vs_CTL	SoloTE-MER51A	0.973316	FALSE	Interneuron_4	0.252428	0.316456
0.554085	-0.319789	0.378	0.425	1	DS_vs_CTL	SoloTE-L1MA5A	0.892258	FALSE	Interneuron_4	1.23145	2.11585
0.00513087	-0.323412	0.765	0.671	1	DS_vs_CTL	SoloTE-L1PA13	0.227957	FALSE	Interneuron_4	3.74156	5.91492
0.746689	-0.323966	0.16	0.178	1	DS_vs_CTL	SoloTE-MER44C	0.935393	FALSE	Interneuron_4	0.294822	0.423081
0.502529	-0.324404	0.605	0.658	1	DS_vs_CTL	SoloTE-L1ME3B	0.887991	FALSE	Interneuron_4	3.24343	4.65334
0.531315	-0.328233	0.067	0.055	1	DS_vs_CTL	SoloTE-LTR16A1	0.892258	FALSE	Interneuron_4	0.0998765	0.176674
0.00785479	-0.329242	0.916	0.932	1	DS_vs_CTL	SoloTE-L1PA5	0.268036	FALSE	Interneuron_4	8.31705	13.6655
0.387164	-0.32965	0.151	0.137	1	DS_vs_CTL	SoloTE-MLT1N2	0.854418	FALSE	Interneuron_4	0.531885	0.721087
0.950621	-0.331495	0.059	0.068	1	DS_vs_CTL	SoloTE-HERVE-int	0.974418	FALSE	Interneuron_4	0.126055	0.157635
0.57956	-0.333467	0.496	0.548	1	DS_vs_CTL	SoloTE-L1M4c	0.896728	FALSE	Interneuron_4	2.1272	2.88871
0.103926	-0.335536	0.563	0.575	1	DS_vs_CTL	SoloTE-AluYe5	0.689961	FALSE	Interneuron_4	2.93684	2.89195
0.346624	-0.337385	0.193	0.178	1	DS_vs_CTL	SoloTE-Tigger4b	0.854418	FALSE	Interneuron_4	0.647477	0.975577
0.00936045	-0.338145	0.798	0.74	1	DS_vs_CTL	SoloTE-L1HS	0.29111	FALSE	Interneuron_4	3.41699	3.23246
0.710338	-0.340625	0.067	0.055	1	DS_vs_CTL	SoloTE-Tigger6a	0.935393	FALSE	Interneuron_4	0.214037	0.324209
0.68663	-0.34122	0.067	0.055	1	DS_vs_CTL	SoloTE-MER11B	0.935393	FALSE	Interneuron_4	0.0994457	0.147884
0.499745	-0.341529	0.151	0.151	1	DS_vs_CTL	SoloTE-MER47A	0.887367	FALSE	Interneuron_4	0.41008	0.629941
0.914989	-0.343341	0.084	0.082	1	DS_vs_CTL	SoloTE-HERVK11-int	0.973316	FALSE	Interneuron_4	0.0949253	0.14557
0.802722	-0.350455	0.084	0.082	1	DS_vs_CTL	SoloTE-LTR33A-	0.938104	FALSE	Interneuron_4	0.184341	0.234935
0.0542576	-0.352867	0.555	0.548	1	DS_vs_CTL	SoloTE-MLT1B	0.51688	FALSE	Interneuron_4	2.14598	3.08708
0.888534	-0.358459	0.067	0.068	1	DS_vs_CTL	SoloTE-LTR84b	0.973008	FALSE	Interneuron_4	0.230052	0.237617
0.216694	-0.359674	0.218	0.192	1	DS_vs_CTL	SoloTE-MER102b	0.768723	FALSE	Interneuron_4	0.760023	1.03105
0.78011	-0.360914	0.126	0.151	1	DS_vs_CTL	SoloTE-MER94	0.935393	FALSE	Interneuron_4	0.416766	0.64379
0.131175	-0.36215	0.689	0.781	1	DS_vs_CTL	SoloTE-L1PA11	0.721386	FALSE	Interneuron_4	3.03043	5.26764
0.378304	-0.368473	0.084	0.068	1	DS_vs_CTL	SoloTE-MER44B	0.854418	FALSE	Interneuron_4	0.272322	0.480506
0.922913	-0.372137	0.092	0.11	1	DS_vs_CTL	SoloTE-HSMAR1	0.973316	FALSE	Interneuron_4	0.244831	0.359604
0.43946	-0.377094	0.168	0.151	1	DS_vs_CTL	SoloTE-MER58C	0.878919	FALSE	Interneuron_4	0.601992	0.802932
0.210819	-0.377159	0.479	0.548	1	DS_vs_CTL	SoloTE-MLT1K	0.766838	FALSE	Interneuron_4	1.64315	2.38836
0.759947	-0.377261	0.059	0.055	1	DS_vs_CTL	SoloTE-LTR85a	0.935393	FALSE	Interneuron_4	0.133621	0.210596
0.69933	-0.380452	0.126	0.123	1	DS_vs_CTL	SoloTE-LTR46-int	0.935393	FALSE	Interneuron_4	0.245677	0.293236
0.571098	-0.385632	0.202	0.219	1	DS_vs_CTL	SoloTE-AluYk11	0.89668	FALSE	Interneuron_4	0.634469	0.652968
0.765516	-0.386616	0.134	0.137	1	DS_vs_CTL	SoloTE-AluYh3a3	0.935393	FALSE	Interneuron_4	0.352604	0.384555
0.796886	-0.388258	0.092	0.123	1	DS_vs_CTL	SoloTE-LTR82A	0.938104	FALSE	Interneuron_4	0.201509	0.253021
0.667554	-0.389901	0.185	0.205	1	DS_vs_CTL	SoloTE-LTR102-Mam	0.935393	FALSE	Interneuron_4	0.118287	0.174333
0.0141958	-0.390029	0.471	0.37	1	DS_vs_CTL	SoloTE-L1P1	0.297009	FALSE	Interneuron_4	1.56017	1.82015
0.0576908	-0.391602	0.807	0.849	1	DS_vs_CTL	SoloTE-L1MA9	0.520053	FALSE	Interneuron_4	4.53445	7.48945
0.247798	-0.393283	0.185	0.164	1	DS_vs_CTL	SoloTE-LTR7	0.78038	FALSE	Interneuron_4	0.465021	0.501958
0.275564	-0.39405	0.462	0.521	1	DS_vs_CTL	SoloTE-L1ME3D	0.805636	FALSE	Interneuron_4	1.53217	2.15001
0.00810959	-0.39793	0.924	0.973	1	DS_vs_CTL	SoloTE-L1PA4	0.268036	FALSE	Interneuron_4	11.1711	16.2987
0.560889	-0.401964	0.168	0.178	1	DS_vs_CTL	SoloTE-MARNA	0.892258	FALSE	Interneuron_4	0.525019	0.701962
0.54175	-0.402708	0.118	0.11	1	DS_vs_CTL	SoloTE-Arthur1	0.892258	FALSE	Interneuron_4	0.283925	0.370184
0.397717	-0.403759	0.034	0.068	1	DS_vs_CTL	SoloTE-LTR41B	0.854418	FALSE	Interneuron_4	0.125265	0.168519
0.820793	-0.403794	0.261	0.288	1	DS_vs_CTL	SoloTE-L1M8	0.942124	FALSE	Interneuron_4	0.790072	1.18881
0.951543	-0.405582	0.05	0.055	1	DS_vs_CTL	SoloTE-HERVK13-int	0.974418	FALSE	Interneuron_4	0.0866779	0.0786412
0.522301	-0.408906	0.294	0.288	1	DS_vs_CTL	SoloTE-L1PB	0.892258	FALSE	Interneuron_4	0.865482	0.906986
0.0668285	-0.417905	0.664	0.712	1	DS_vs_CTL	SoloTE-L1PA15	0.569416	FALSE	Interneuron_4	3.18701	5.39745
0.0115909	-0.420372	0.563	0.562	1	DS_vs_CTL	SoloTE-L1PB4	0.297009	FALSE	Interneuron_4	2.55988	3.90718
0.331674	-0.420925	0.151	0.137	1	DS_vs_CTL	SoloTE-OldhAT1	0.854418	FALSE	Interneuron_4	0.357101	0.516156
0.0218913	-0.436472	0.336	0.274	1	DS_vs_CTL	SoloTE-Charlie2b	0.319898	FALSE	Interneuron_4	0.963731	1.1796
0.0335823	-0.437545	0.513	0.493	1	DS_vs_CTL	SoloTE-MLT1L	0.394117	FALSE	Interneuron_4	1.38147	1.86136
0.812698	-0.441793	0.109	0.137	1	DS_vs_CTL	SoloTE-Tigger18a	0.941076	FALSE	Interneuron_4	0.323825	0.442332
0.743644	-0.443032	0.084	0.082	1	DS_vs_CTL	SoloTE-MER45B	0.935393	FALSE	Interneuron_4	0.267755	0.346336
0.91475	-0.446506	0.067	0.082	1	DS_vs_CTL	SoloTE-MER50-int	0.973316	FALSE	Interneuron_4	0.152337	0.190865
0.113493	-0.450919	0.218	0.205	1	DS_vs_CTL	SoloTE-L1MEh	0.697896	FALSE	Interneuron_4	0.710334	0.987472
0.129974	-0.455945	0.454	0.603	1	DS_vs_CTL	SoloTE-MER58A	0.721386	FALSE	Interneuron_4	2.43874	3.295
0.152594	-0.464656	0.395	0.452	1	DS_vs_CTL	SoloTE-L1PA12	0.732709	FALSE	Interneuron_4	1.02975	1.2646
0.413896	-0.465011	0.134	0.137	1	DS_vs_CTL	SoloTE-MLT1M	0.860743	FALSE	Interneuron_4	0.423209	0.714126
0.576014	-0.472296	0.143	0.164	1	DS_vs_CTL	SoloTE-LTR17	0.89668	FALSE	Interneuron_4	0.425704	0.510762
0.48226	-0.472477	0.269	0.288	1	DS_vs_CTL	SoloTE-Charlie5	0.884894	FALSE	Interneuron_4	0.767718	0.883771
0.699406	-0.473519	0.143	0.164	1	DS_vs_CTL	SoloTE-Charlie18a	0.935393	FALSE	Interneuron_4	0.390705	0.608364
0.110519	-0.474773	0.58	0.671	1	DS_vs_CTL	SoloTE-MLT1A0	0.689961	FALSE	Interneuron_4	2.26934	3.13748
0.0229146	-0.485869	0.345	0.342	1	DS_vs_CTL	SoloTE-MER30	0.319898	FALSE	Interneuron_4	1.56851	1.97559
0.911728	-0.495802	0.067	0.082	1	DS_vs_CTL	SoloTE-MLT1H2-int	0.973316	FALSE	Interneuron_4	0.124727	0.158796
0.0380508	-0.50741	0.538	0.658	1	DS_vs_CTL	SoloTE-MER5B	0.422636	FALSE	Interneuron_4	2.68071	3.76484
0.000121335	-0.509519	0.958	0.945	0.131285	DS_vs_CTL	SoloTE-L1PA3	0.0251569	TRUE	Interneuron_4	15.0102	18.5481
0.114446	-0.514731	0.286	0.26	1	DS_vs_CTL	SoloTE-LTR7B	0.697896	FALSE	Interneuron_4	0.816722	0.798842
0.489703	-0.516198	0.034	0.068	1	DS_vs_CTL	SoloTE-Charlie17a	0.884894	FALSE	Interneuron_4	0.0951402	0.159792
0.436419	-0.520845	0.21	0.247	1	DS_vs_CTL	SoloTE-L1M4a2	0.878919	FALSE	Interneuron_4	0.668815	1.24614
0.17763	-0.521131	0.202	0.205	1	DS_vs_CTL	SoloTE-MER112	0.758099	FALSE	Interneuron_4	0.953395	1.28469
0.929349	-0.52494	0.067	0.068	1	DS_vs_CTL	SoloTE-MER6A	0.973316	FALSE	Interneuron_4	0.175851	0.304564
0.164918	-0.527646	0.412	0.466	1	DS_vs_CTL	SoloTE-AluYk3	0.732709	FALSE	Interneuron_4	2.30684	2.38561
0.899917	-0.531374	0.05	0.055	1	DS_vs_CTL	SoloTE-LTR38	0.973316	FALSE	Interneuron_4	0.0378942	0.0362337
0.677345	-0.542031	0.168	0.178	1	DS_vs_CTL	SoloTE-MER117	0.935393	FALSE	Interneuron_4	0.369235	0.562102
0.745358	-0.546215	0.067	0.068	1	DS_vs_CTL	SoloTE-LTR37B	0.935393	FALSE	Interneuron_4	0.20655	0.241694
0.735621	-0.548199	0.143	0.178	1	DS_vs_CTL	SoloTE-MLT1H1	0.935393	FALSE	Interneuron_4	0.392763	0.511931
0.624748	-0.550806	0.151	0.178	1	DS_vs_CTL	SoloTE-ERVL-B4-int	0.933273	FALSE	Interneuron_4	0.47454	0.64158
9.24397e-05	-0.551706	0.933	0.932	0.10002	DS_vs_CTL	SoloTE-L1PA2	0.0251569	TRUE	Interneuron_4	9.5004	10.2916
0.399326	-0.557984	0.059	0.041	1	DS_vs_CTL	SoloTE-MER75	0.854418	FALSE	Interneuron_4	0.133979	0.152545
0.533561	-0.568792	0.151	0.164	1	DS_vs_CTL	SoloTE-L4-B-Mam	0.892258	FALSE	Interneuron_4	0.507091	0.708445
0.190487	-0.570825	0.176	0.192	1	DS_vs_CTL	SoloTE-Tigger4	0.758099	FALSE	Interneuron_4	0.645329	0.849707
0.110926	-0.572316	0.429	0.507	1	DS_vs_CTL	SoloTE-L1M4b	0.689961	FALSE	Interneuron_4	1.71944	2.29262
0.244117	-0.578186	0.16	0.164	1	DS_vs_CTL	SoloTE-MER4D1	0.78038	FALSE	Interneuron_4	0.529581	0.600199
0.729078	-0.579591	0.042	0.068	1	DS_vs_CTL	SoloTE-MLT1F-int	0.935393	FALSE	Interneuron_4	0.0902438	0.127978
0.474325	-0.580257	0.168	0.233	1	DS_vs_CTL	SoloTE-THE1D-int	0.884894	FALSE	Interneuron_4	0.50169	0.694974
0.214147	-0.59541	0.311	0.411	1	DS_vs_CTL	SoloTE-MIR1-Amn	0.768723	FALSE	Interneuron_4	1.00296	1.42615
0.209597	-0.595474	0.252	0.315	1	DS_vs_CTL	SoloTE-MLT1E1A	0.766838	FALSE	Interneuron_4	0.680537	1.08659
0.0253135	-0.596926	0.697	0.795	1	DS_vs_CTL	SoloTE-L1MC3	0.325033	FALSE	Interneuron_4	3.5819	5.6904
0.196837	-0.601671	0.109	0.096	1	DS_vs_CTL	SoloTE-L1MEg1	0.764494	FALSE	Interneuron_4	0.272554	0.395289
0.280996	-0.602726	0.076	0.041	1	DS_vs_CTL	SoloTE-Kanga1d	0.805636	FALSE	Interneuron_4	0.105435	0.134547
0.836862	-0.603393	0.05	0.068	1	DS_vs_CTL	SoloTE-MLT2B2	0.942124	FALSE	Interneuron_4	0.146069	0.250657
0.379714	-0.633182	0.067	0.055	1	DS_vs_CTL	SoloTE-MER54A	0.854418	FALSE	Interneuron_4	0.0822028	0.148203
0.879858	-0.639108	0.042	0.055	1	DS_vs_CTL	SoloTE-MER106B	0.970968	FALSE	Interneuron_4	0.211905	0.288158
0.083287	-0.640262	0.378	0.438	1	DS_vs_CTL	SoloTE-L1P3	0.61672	FALSE	Interneuron_4	1.18494	1.70187
0.0417734	-0.641569	0.336	0.342	1	DS_vs_CTL	SoloTE-MLT1A	0.440391	FALSE	Interneuron_4	1.36593	1.68149
0.30323	-0.647423	0.294	0.356	1	DS_vs_CTL	SoloTE-Tigger13a	0.829171	FALSE	Interneuron_4	0.923066	1.21468
0.138581	-0.652114	0.277	0.301	1	DS_vs_CTL	SoloTE-L1MCc	0.721386	FALSE	Interneuron_4	0.705349	1.12822
0.464028	-0.670018	0.05	0.041	1	DS_vs_CTL	SoloTE-MER31B	0.884894	FALSE	Interneuron_4	0.205164	0.27706
0.804153	-0.6738	0.059	0.082	1	DS_vs_CTL	SoloTE-HERVK22-int	0.938104	FALSE	Interneuron_4	0.0900586	0.125516
0.0237689	-0.675006	0.185	0.192	1	DS_vs_CTL	SoloTE-MER102a	0.319898	FALSE	Interneuron_4	0.512208	0.67635
0.309706	-0.697877	0.168	0.219	1	DS_vs_CTL	SoloTE-ERV3-16A3-I-int	0.830556	FALSE	Interneuron_4	0.472856	0.693246
0.728516	-0.698972	0.042	0.068	1	DS_vs_CTL	SoloTE-MER61C	0.935393	FALSE	Interneuron_4	0.0702424	0.0828814
0.412514	-0.702301	0.185	0.247	1	DS_vs_CTL	SoloTE-AluYb9	0.860743	FALSE	Interneuron_4	0.96892	0.981621
0.59699	-0.716431	0.076	0.082	1	DS_vs_CTL	SoloTE-MER63C	0.907892	FALSE	Interneuron_4	0.332897	0.372826
0.295462	-0.718063	0.168	0.233	1	DS_vs_CTL	SoloTE-MER81	0.821396	FALSE	Interneuron_4	0.677318	0.739243
0.751469	-0.718174	0.076	0.096	1	DS_vs_CTL	SoloTE-MLT2C1	0.935393	FALSE	Interneuron_4	0.185173	0.234225
0.491983	-0.718621	0.042	0.082	1	DS_vs_CTL	SoloTE-Charlie3	0.884894	FALSE	Interneuron_4	0.100109	0.155202
0.250111	-0.725808	0.017	0.055	1	DS_vs_CTL	SoloTE-MER70B	0.781754	FALSE	Interneuron_4	0.0863546	0.085071
0.415149	-0.752078	0.16	0.205	1	DS_vs_CTL	SoloTE-Tigger3c	0.860743	FALSE	Interneuron_4	0.476607	0.657048
0.516594	-0.759995	0.101	0.11	1	DS_vs_CTL	SoloTE-Tigger3	0.892258	FALSE	Interneuron_4	0.309616	0.40137
0.423609	-0.762611	0.084	0.096	1	DS_vs_CTL	SoloTE-MER45A	0.866727	FALSE	Interneuron_4	0.251802	0.339698
0.486625	-0.763614	0.101	0.123	1	DS_vs_CTL	SoloTE-HERVIP10FH-int	0.884894	FALSE	Interneuron_4	0.296342	0.350366
0.339808	-0.76918	0.092	0.164	1	DS_vs_CTL	SoloTE-Looper	0.854418	FALSE	Interneuron_4	0.293457	0.369413
0.0812393	-0.777337	0.286	0.411	1	DS_vs_CTL	SoloTE-AluYg6	0.61672	FALSE	Interneuron_4	1.40899	1.441
0.469891	-0.806673	0.076	0.096	1	DS_vs_CTL	SoloTE-LTR41	0.884894	FALSE	Interneuron_4	0.254332	0.318356
0.780992	-0.807318	0.034	0.055	1	DS_vs_CTL	SoloTE-HERVI-int	0.935393	FALSE	Interneuron_4	0.0998128	0.089575
0.126654	-0.811423	0.193	0.301	1	DS_vs_CTL	SoloTE-MADE1	0.721386	FALSE	Interneuron_4	0.7213	0.905948
0.521297	-0.832383	0.042	0.082	1	DS_vs_CTL	SoloTE-L2-1-AMi	0.892258	FALSE	Interneuron_4	0.13656	0.30575
0.324022	-0.833481	0.151	0.178	1	DS_vs_CTL	SoloTE-AluYd8	0.850386	FALSE	Interneuron_4	0.614071	0.590844
0.130854	-0.834394	0.193	0.26	1	DS_vs_CTL	SoloTE-MER1B	0.721386	FALSE	Interneuron_4	0.802481	1.1956
0.662264	-0.839352	0.05	0.055	1	DS_vs_CTL	SoloTE-MLT2F	0.935393	FALSE	Interneuron_4	0.126734	0.219043
0.583189	-0.840702	0.025	0.055	1	DS_vs_CTL	SoloTE-Tigger11a	0.896728	FALSE	Interneuron_4	0.0805478	0.105491
0.669821	-0.868082	0.05	0.068	1	DS_vs_CTL	SoloTE-AluYi6-4d	0.935393	FALSE	Interneuron_4	0.177295	0.175146
0.218287	-0.892214	0.143	0.219	1	DS_vs_CTL	SoloTE-MER44A	0.768723	FALSE	Interneuron_4	0.495864	0.688247
0.426267	-0.892381	0.118	0.164	1	DS_vs_CTL	SoloTE-MER8	0.868227	FALSE	Interneuron_4	0.404946	0.532465
0.390861	-0.896679	0.109	0.151	1	DS_vs_CTL	SoloTE-L1PA15-16	0.854418	FALSE	Interneuron_4	0.403693	0.499175
0.08579	-0.899773	0.269	0.37	1	DS_vs_CTL	SoloTE-MLT1F2	0.626095	FALSE	Interneuron_4	0.975904	1.2535
0.555942	-0.904542	0.067	0.096	1	DS_vs_CTL	SoloTE-Tigger9a	0.892258	FALSE	Interneuron_4	0.16444	0.213358
0.272149	-0.911987	0.101	0.178	1	DS_vs_CTL	SoloTE-Tigger16a	0.805636	FALSE	Interneuron_4	0.2142	0.362725
0.278505	-0.912017	0.067	0.137	1	DS_vs_CTL	SoloTE-L1PBa1	0.805636	FALSE	Interneuron_4	0.216996	0.293773
0.729356	-0.917777	0.042	0.068	1	DS_vs_CTL	SoloTE-LTR1A1	0.935393	FALSE	Interneuron_4	0.0812065	0.0991962
0.762501	-0.927388	0.042	0.055	1	DS_vs_CTL	SoloTE-MER51-int	0.935393	FALSE	Interneuron_4	0.0969571	0.117809
0.566504	-0.950716	0.025	0.055	1	DS_vs_CTL	SoloTE-MER47B	0.896232	FALSE	Interneuron_4	0.0806895	0.127001
0.76666	-0.967084	0.034	0.055	1	DS_vs_CTL	SoloTE-L1PBb	0.935393	FALSE	Interneuron_4	0.173152	0.201345
0.000222467	-0.982962	0.429	0.507	0.240709	DS_vs_CTL	SoloTE-L1MA1	0.0345936	TRUE	Interneuron_4	1.43	2.91038
0.647877	-0.999424	0.042	0.068	1	DS_vs_CTL	SoloTE-LTR23	0.935393	FALSE	Interneuron_4	0.157826	0.178121
0.720737	-1.01018	0.034	0.055	1	DS_vs_CTL	SoloTE-LTR53	0.935393	FALSE	Interneuron_4	0.0967652	0.114767
0.138034	-1.01775	0.118	0.151	1	DS_vs_CTL	SoloTE-Charlie23a	0.721386	FALSE	Interneuron_4	0.196796	0.270456
0.640529	-1.03575	0.05	0.055	1	DS_vs_CTL	SoloTE-Charlie7a	0.933273	FALSE	Interneuron_4	0.172388	0.254745
0.58257	-1.037	0.025	0.055	1	DS_vs_CTL	SoloTE-LTR28C	0.896728	FALSE	Interneuron_4	0.051032	0.0643178
0.715341	-1.03774	0.034	0.055	1	DS_vs_CTL	SoloTE-L1MEa	0.935393	FALSE	Interneuron_4	0.0761063	0.113747
0.574504	-1.03967	0.059	0.082	1	DS_vs_CTL	SoloTE-LTR2	0.89668	FALSE	Interneuron_4	0.198168	0.205456
0.356414	-1.04657	0.084	0.11	1	DS_vs_CTL	SoloTE-MER4D	0.854418	FALSE	Interneuron_4	0.211893	0.239876
0.715789	-1.06882	0.034	0.055	1	DS_vs_CTL	SoloTE-PABL-B-int	0.935393	FALSE	Interneuron_4	0.0726354	0.0782708
0.725745	-1.08204	0.034	0.055	1	DS_vs_CTL	SoloTE-LTR16E1	0.935393	FALSE	Interneuron_4	0.0788575	0.122219
0.20159	-1.08824	0.092	0.123	1	DS_vs_CTL	SoloTE-MER5C	0.764494	FALSE	Interneuron_4	0.392486	0.505322
0.635938	-1.08913	0.042	0.055	1	DS_vs_CTL	SoloTE-L1M3de	0.933273	FALSE	Interneuron_4	0.142332	0.209755
0.208988	-1.08944	0.109	0.137	1	DS_vs_CTL	SoloTE-L1M2c	0.766838	FALSE	Interneuron_4	0.281509	0.402756
0.374043	-1.10367	0.05	0.055	1	DS_vs_CTL	SoloTE-X7B-LINE	0.854418	FALSE	Interneuron_4	0.087232	0.119527
0.547477	-1.10882	0.059	0.096	1	DS_vs_CTL	SoloTE-MER52A	0.892258	FALSE	Interneuron_4	0.136707	0.20353
0.0632054	-1.11782	0.134	0.178	1	DS_vs_CTL	SoloTE-MamTip2	0.546024	FALSE	Interneuron_4	0.422191	0.533931
0.342665	-1.11823	0.067	0.096	1	DS_vs_CTL	SoloTE-Charlie9	0.854418	FALSE	Interneuron_4	0.173998	0.229336
0.2059	-1.14414	0.042	0.11	1	DS_vs_CTL	SoloTE-MER63D	0.764494	FALSE	Interneuron_4	0.245603	0.289956
0.281925	-1.17536	0.059	0.123	1	DS_vs_CTL	SoloTE-MLT2B3	0.805636	FALSE	Interneuron_4	0.194258	0.293121
0.229958	-1.18129	0.059	0.068	1	DS_vs_CTL	SoloTE-LTR10C	0.776638	FALSE	Interneuron_4	0.196611	0.254102
0.5492	-1.1836	0.042	0.068	1	DS_vs_CTL	SoloTE-THE1C-int	0.892258	FALSE	Interneuron_4	0.141505	0.319306
0.446509	-1.19686	0.042	0.082	1	DS_vs_CTL	SoloTE-LTR9D	0.880066	FALSE	Interneuron_4	0.131058	0.168707
0.585193	-1.2	0.042	0.068	1	DS_vs_CTL	SoloTE-MER51B	0.896728	FALSE	Interneuron_4	0.0771196	0.0899033
0.192553	-1.20089	0.042	0.11	1	DS_vs_CTL	SoloTE-MER39B	0.758099	FALSE	Interneuron_4	0.154187	0.20377
0.175043	-1.21833	0.109	0.192	1	DS_vs_CTL	SoloTE-Tigger19a	0.758099	FALSE	Interneuron_4	0.446773	0.699575
0.557801	-1.22376	0.042	0.068	1	DS_vs_CTL	SoloTE-MER6	0.892258	FALSE	Interneuron_4	0.161998	0.260757
0.139499	-1.26012	0.076	0.164	1	DS_vs_CTL	SoloTE-ORSL	0.721386	FALSE	Interneuron_4	0.209373	0.229743
0.422288	-1.28595	0.05	0.096	1	DS_vs_CTL	SoloTE-LTR89	0.866727	FALSE	Interneuron_4	0.111639	0.157217
0.135513	-1.29792	0.076	0.096	1	DS_vs_CTL	SoloTE-LTR67B	0.721386	FALSE	Interneuron_4	0.266108	0.3397
0.362244	-1.31394	0.025	0.068	1	DS_vs_CTL	SoloTE-MER57B2	0.854418	FALSE	Interneuron_4	0.110733	0.149045
0.341608	-1.33532	0.05	0.068	1	DS_vs_CTL	SoloTE-L1MEg2	0.854418	FALSE	Interneuron_4	0.0986214	0.159918
0.220454	-1.39919	0.059	0.096	1	DS_vs_CTL	SoloTE-MER67B	0.768723	FALSE	Interneuron_4	0.0983383	0.109527
0.368524	-1.46952	0.05	0.096	1	DS_vs_CTL	SoloTE-Tigger5b	0.854418	FALSE	Interneuron_4	0.23901	0.331127
0.357493	-1.48288	0.017	0.055	1	DS_vs_CTL	SoloTE-LTR25	0.854418	FALSE	Interneuron_4	0.09893	0.140704
0.0865662	-1.52426	0.084	0.164	1	DS_vs_CTL	SoloTE-Tigger8	0.626095	FALSE	Interneuron_4	0.246563	0.294022
0.350106	-1.54546	0.025	0.068	1	DS_vs_CTL	SoloTE-MLT1E	0.854418	FALSE	Interneuron_4	0.060627	0.099309
0.240645	-1.58281	0.042	0.096	1	DS_vs_CTL	SoloTE-Helitron3Na-Mam	0.78038	FALSE	Interneuron_4	0.199157	0.274005
0.471908	-1.5986	0.042	0.068	1	DS_vs_CTL	SoloTE-Charlie30a	0.884894	FALSE	Interneuron_4	0.0814214	0.125953
0.491572	-1.65134	0.025	0.055	1	DS_vs_CTL	SoloTE-MER30B	0.884894	FALSE	Interneuron_4	0.0530935	0.064607
0.490192	-1.67262	0.025	0.055	1	DS_vs_CTL	SoloTE-LTR104-Mam	0.884894	FALSE	Interneuron_4	0.134575	0.206351
0.164313	-1.70113	0.05	0.096	1	DS_vs_CTL	SoloTE-MLT1J-int	0.732709	FALSE	Interneuron_4	0.182368	0.251078
0.355676	-1.70339	0.017	0.055	1	DS_vs_CTL	SoloTE-LTR81C	0.854418	FALSE	Interneuron_4	0.0272767	0.0420094
0.392754	-1.71734	0.034	0.055	1	DS_vs_CTL	SoloTE-MER113B	0.854418	FALSE	Interneuron_4	0.133075	0.155352
0.204806	-1.73536	0.042	0.068	1	DS_vs_CTL	SoloTE-MER89	0.764494	FALSE	Interneuron_4	0.102885	0.157562
0.422654	-1.76417	0.025	0.055	1	DS_vs_CTL	SoloTE-LTR16B	0.866727	FALSE	Interneuron_4	0.0791901	0.0973885
0.0977772	-1.93032	0.042	0.123	1	DS_vs_CTL	SoloTE-Charlie25	0.668323	FALSE	Interneuron_4	0.304057	0.392374
0.34595	-1.97753	0.017	0.055	1	DS_vs_CTL	SoloTE-LTR10D	0.854418	FALSE	Interneuron_4	0.0690964	0.0820283
0.101683	-2.06756	0.042	0.11	1	DS_vs_CTL	SoloTE-CR1-3-Croc	0.687462	FALSE	Interneuron_4	0.0881825	0.175142
0.18973	-2.09603	0.017	0.068	1	DS_vs_CTL	SoloTE-LTR26	0.758099	FALSE	Interneuron_4	0.059514	0.0715268
0.0405141	-2.3169	0.042	0.123	1	DS_vs_CTL	SoloTE-MER106A	0.440391	FALSE	Interneuron_4	0.208964	0.324309
0.123825	-2.41315	0.025	0.082	1	DS_vs_CTL	SoloTE-LTR6B	0.721386	FALSE	Interneuron_4	0.075177	0.0883647
0.0146491	-2.56876	0.042	0.137	1	DS_vs_CTL	SoloTE-LTR54	0.297009	FALSE	Interneuron_4	0.257588	0.322426
0.139986	-2.92907	0.008	0.055	1	DS_vs_CTL	SoloTE-Charlie26a	0.721386	FALSE	Interneuron_4	0.0660352	0.0909777
0.0688815	-3.07415	0.008	0.068	1	DS_vs_CTL	SoloTE-LTR3B-	0.578977	FALSE	Interneuron_4	0.0262968	0.0346737

## Sheet: Interneuron_M1
p_val	avg_log2FC	pct.1	pct.2	p_val_adj	comparison	gene	FDR	sig	cellsubtype	CTL_expression	DS_expression
6.10618e-22	6.62135	0.064	0	6.60688e-19	DS_vs_CTL	SoloTE-Eulor6C	8.57463e-21	TRUE	Interneuron_M1	0.00706753	0.0237838
4.77112e-15	1.46967	0.178	0.065	5.16235e-12	DS_vs_CTL	SoloTE-LTR46-int	3.7939e-14	TRUE	Interneuron_M1	0.245677	0.293236
0.000406602	1.17641	0.066	0.031	0.439944	DS_vs_CTL	SoloTE-LTR80A	0.00102427	TRUE	Interneuron_M1	0.0293098	0.042809
0.00076161	1.08456	0.05	0.021	0.824062	DS_vs_CTL	SoloTE-MER61C	0.00180166	TRUE	Interneuron_M1	0.0702424	0.0828814
4.42593e-06	0.977416	0.1	0.046	0.00478885	DS_vs_CTL	SoloTE-MER51B	1.56209e-05	TRUE	Interneuron_M1	0.0771196	0.0899033
3.96929e-05	0.953652	0.063	0.026	0.0429477	DS_vs_CTL	SoloTE-DNA1-Mam	0.000117477	TRUE	Interneuron_M1	0.0687892	0.0678716
0.00126965	0.827701	0.083	0.045	1	DS_vs_CTL	SoloTE-LTR103b-Mam	0.00284057	TRUE	Interneuron_M1	0.0489613	0.07365
0.0140142	0.750956	0.086	0.056	1	DS_vs_CTL	SoloTE-PABL-A	0.0232981	TRUE	Interneuron_M1	0.120422	0.142606
0.00358155	0.733476	0.072	0.039	1	DS_vs_CTL	SoloTE-Tigger5	0.00703519	TRUE	Interneuron_M1	0.112113	0.157197
1.52272e-05	0.717043	0.135	0.075	0.0164758	DS_vs_CTL	SoloTE-MLT1-int	5.02496e-05	TRUE	Interneuron_M1	0.035228	0.0652398
0.000535494	0.699033	0.083	0.045	0.579404	DS_vs_CTL	SoloTE-LTR46	0.00131819	TRUE	Interneuron_M1	0.0389935	0.0736168
0.00373465	0.685333	0.069	0.038	1	DS_vs_CTL	SoloTE-LTR106-Mam	0.007271	TRUE	Interneuron_M1	0.109992	0.112492
0.0558657	0.679838	0.07	0.048	1	DS_vs_CTL	SoloTE-Tigger17c	0.0779522	FALSE	Interneuron_M1	0.108859	0.146711
0.000116391	0.645125	0.227	0.159	0.125935	DS_vs_CTL	SoloTE-AluYh3a3	0.000324126	TRUE	Interneuron_M1	0.352604	0.384555
0.0017837	0.640569	0.076	0.043	1	DS_vs_CTL	SoloTE-MLT1H2-int	0.00385981	TRUE	Interneuron_M1	0.124727	0.158796
3.0345e-05	0.614652	0.132	0.076	0.0328333	DS_vs_CTL	SoloTE-LTR10A	9.31521e-05	TRUE	Interneuron_M1	0.20292	0.2251
0.000947731	0.591994	0.076	0.041	1	DS_vs_CTL	SoloTE-LTR53-int	0.00218707	TRUE	Interneuron_M1	0.101537	0.118367
0.0043658	0.536041	0.079	0.048	1	DS_vs_CTL	SoloTE-LTR36	0.00832782	TRUE	Interneuron_M1	0.0987248	0.126849
0.00434486	0.534174	0.122	0.081	1	DS_vs_CTL	SoloTE-MER57A1	0.00831191	TRUE	Interneuron_M1	0.191186	0.249068
8.66263e-05	0.517037	0.129	0.076	0.0937297	DS_vs_CTL	SoloTE-MER66-int	0.000246437	TRUE	Interneuron_M1	0.164787	0.222563
0.0575346	0.491297	0.069	0.047	1	DS_vs_CTL	SoloTE-MER70-int	0.0796076	FALSE	Interneuron_M1	0.0784339	0.0865615
0.000562671	0.483524	0.1	0.059	0.60881	DS_vs_CTL	SoloTE-HERVIP10F-int	0.00137034	TRUE	Interneuron_M1	0.104722	0.156402
2.66475e-12	0.469234	0.721	0.598	2.88326e-09	DS_vs_CTL	SoloTE-AluYf1	1.81313e-11	TRUE	Interneuron_M1	3.02719	3.09015
0.0646491	0.446797	0.057	0.036	1	DS_vs_CTL	SoloTE-PABL-A-int	0.0887077	FALSE	Interneuron_M1	0.0970168	0.12687
0.00609903	0.446408	0.107	0.071	1	DS_vs_CTL	SoloTE-MamGyp-int	0.0110587	TRUE	Interneuron_M1	0.120612	0.17886
7.51393e-06	0.43105	0.224	0.149	0.00813008	DS_vs_CTL	SoloTE-MER61-int	2.58291e-05	TRUE	Interneuron_M1	0.323605	0.397881
0.251164	0.420892	0.062	0.046	1	DS_vs_CTL	SoloTE-LTR9A1	0.290312	FALSE	Interneuron_M1	0.0844166	0.102707
0.0215192	0.403045	0.166	0.124	1	DS_vs_CTL	SoloTE-LTR103-Mam	0.0338966	TRUE	Interneuron_M1	0.318036	0.445474
1.96766e-07	0.384794	0.235	0.152	0.0002129	DS_vs_CTL	SoloTE-Ricksha	8.60035e-07	TRUE	Interneuron_M1	0.213622	0.333721
4.10565e-05	0.375155	0.342	0.255	0.0444232	DS_vs_CTL	SoloTE-AluYb9	0.000120432	TRUE	Interneuron_M1	0.96892	0.981621
6.2138e-08	0.361525	0.759	0.667	6.72333e-05	DS_vs_CTL	SoloTE-AluYh3	2.92936e-07	TRUE	Interneuron_M1	3.28127	3.63502
2.60068e-15	0.356467	0.945	0.937	2.81394e-12	DS_vs_CTL	SoloTE-AluSc5	2.20058e-14	TRUE	Interneuron_M1	9.97114	10.7813
2.3242e-31	0.353503	0.997	0.999	2.51478e-28	DS_vs_CTL	SoloTE-AluSc	5.47846e-30	TRUE	Interneuron_M1	49.7449	54.5234
1.2956e-06	0.348788	0.281	0.195	0.00140184	DS_vs_CTL	SoloTE-MER74A	5.05976e-06	TRUE	Interneuron_M1	0.464549	0.683625
2.06649e-09	0.323315	0.41	0.291	2.23594e-06	DS_vs_CTL	SoloTE-AluYc3	1.0999e-08	TRUE	Interneuron_M1	1.0117	1.09814
1.22192e-10	0.322051	0.859	0.761	1.32211e-07	DS_vs_CTL	SoloTE-AluYc	7.39876e-10	TRUE	Interneuron_M1	5.4862	5.81515
2.92723e-22	0.320699	0.993	0.998	3.16726e-19	DS_vs_CTL	SoloTE-AluSq	4.19994e-21	TRUE	Interneuron_M1	29.2464	32.6396
0.0134959	0.319892	0.096	0.067	1	DS_vs_CTL	SoloTE-MLT1J1-int	0.0225501	TRUE	Interneuron_M1	0.114542	0.140153
8.81747e-21	0.318975	0.999	0.999	9.54051e-18	DS_vs_CTL	SoloTE-AluSg	1.09803e-19	TRUE	Interneuron_M1	52.9186	57.7848
5.46889e-05	0.318183	0.345	0.262	0.0591734	DS_vs_CTL	SoloTE-Tigger19b	0.000157619	TRUE	Interneuron_M1	1.15607	1.34299
1.23202e-06	0.316788	0.595	0.484	0.00133304	DS_vs_CTL	SoloTE-AluYk2	4.84007e-06	TRUE	Interneuron_M1	1.71654	2.15274
0.00279628	0.311936	0.125	0.087	1	DS_vs_CTL	SoloTE-LTR37-int	0.00575576	TRUE	Interneuron_M1	0.248794	0.301207
0.090004	0.309752	0.064	0.046	1	DS_vs_CTL	SoloTE-MER67B	0.119282	FALSE	Interneuron_M1	0.0983383	0.109527
0.201023	0.296599	0.058	0.043	1	DS_vs_CTL	SoloTE-LTR13A	0.239486	FALSE	Interneuron_M1	0.0919323	0.109098
1.01806e-23	0.29472	0.999	1	1.10154e-20	DS_vs_CTL	SoloTE-AluSp	1.5626e-22	TRUE	Interneuron_M1	81.4726	89.2272
0.0355818	0.292144	0.054	0.035	1	DS_vs_CTL	SoloTE-MER4D0	0.052773	FALSE	Interneuron_M1	0.0674973	0.0899379
0.321129	0.290796	0.091	0.074	1	DS_vs_CTL	SoloTE-LTR54B	0.360451	FALSE	Interneuron_M1	0.148941	0.173623
0.295943	0.282086	0.097	0.078	1	DS_vs_CTL	SoloTE-Charlie20a	0.336183	FALSE	Interneuron_M1	0.175253	0.254395
1.20355e-26	0.28083	1	1	1.30224e-23	DS_vs_CTL	SoloTE-AluY	2.26956e-25	TRUE	Interneuron_M1	194.888	202.255
0.454622	0.276516	0.051	0.04	1	DS_vs_CTL	SoloTE-MLT1G-int	0.488682	FALSE	Interneuron_M1	0.0919072	0.112469
4.18227e-11	0.276106	0.979	0.966	4.52521e-08	DS_vs_CTL	SoloTE-AluSx4	2.60405e-10	TRUE	Interneuron_M1	16.4275	18.2692
8.9374e-14	0.275592	0.962	0.964	9.67027e-11	DS_vs_CTL	SoloTE-AluSg7	6.62774e-13	TRUE	Interneuron_M1	12.7043	13.9756
5.71524e-20	0.272665	0.999	1	6.18389e-17	DS_vs_CTL	SoloTE-AluSq2	6.73582e-19	TRUE	Interneuron_M1	79.6857	86.6684
0.197828	0.2713	0.081	0.063	1	DS_vs_CTL	SoloTE-MLT1F2-int	0.237394	FALSE	Interneuron_M1	0.244959	0.195277
2.72438e-05	0.267635	0.097	0.057	0.0294778	DS_vs_CTL	SoloTE-MER97c	8.44175e-05	TRUE	Interneuron_M1	0.174964	0.193592
0.00855459	0.263908	0.073	0.048	1	DS_vs_CTL	SoloTE-HERVL74-int	0.0148972	TRUE	Interneuron_M1	0.127561	0.171303
7.81778e-13	0.253142	0.998	0.999	8.45884e-10	DS_vs_CTL	SoloTE-AluSc8	5.48908e-12	TRUE	Interneuron_M1	34.9828	38.0261
0.00903285	0.25206	0.142	0.106	1	DS_vs_CTL	SoloTE-MER96B	0.0155252	TRUE	Interneuron_M1	0.227106	0.293227
0.0307652	0.25126	0.095	0.071	1	DS_vs_CTL	SoloTE-HUERS-P1-int	0.0463585	TRUE	Interneuron_M1	0.114853	0.137755
4.41159e-10	0.251209	0.928	0.897	4.77334e-07	DS_vs_CTL	SoloTE-AluYm1	2.48859e-09	TRUE	Interneuron_M1	8.82938	9.08026
0.22632	0.250643	0.09	0.072	1	DS_vs_CTL	SoloTE-LTR1A1	0.264843	FALSE	Interneuron_M1	0.0812065	0.0991962
1.19543e-15	0.244826	1	1	1.29346e-12	DS_vs_CTL	SoloTE-AluSx1	1.0808e-14	FALSE	Interneuron_M1	157.501	172.969
0.223734	0.244178	0.056	0.041	1	DS_vs_CTL	SoloTE-MER96	0.262748	FALSE	Interneuron_M1	0.085303	0.0980726
0.00282522	0.241821	0.057	0.035	1	DS_vs_CTL	SoloTE-MER61A	0.00579083	FALSE	Interneuron_M1	0.0500836	0.0857689
3.40907e-16	0.241549	1	1	3.68861e-13	DS_vs_CTL	SoloTE-AluSx	3.12498e-15	FALSE	Interneuron_M1	152.018	165.188
0.411383	0.234246	0.052	0.041	1	DS_vs_CTL	SoloTE-MER34C-	0.448781	FALSE	Interneuron_M1	0.0847668	0.113868
1.32399e-07	0.233883	0.309	0.222	0.000143255	DS_vs_CTL	SoloTE-MER4D1	5.94443e-07	FALSE	Interneuron_M1	0.529581	0.600199
9.21975e-12	0.232635	1	1	9.97577e-09	DS_vs_CTL	SoloTE-AluSz	6.02479e-11	FALSE	Interneuron_M1	132.869	148.245
0.00319891	0.231235	0.15	0.111	1	DS_vs_CTL	SoloTE-MER67C	0.00641727	FALSE	Interneuron_M1	0.231153	0.272678
8.23035e-08	0.231199	0.947	0.936	8.90524e-05	DS_vs_CTL	SoloTE-AluSg4	3.79863e-07	FALSE	Interneuron_M1	10.3445	11.3836
0.00812814	0.228791	0.097	0.068	1	DS_vs_CTL	SoloTE-Tigger9a	0.0143822	FALSE	Interneuron_M1	0.16444	0.213358
4.48854e-08	0.223703	0.997	0.996	4.8566e-05	DS_vs_CTL	SoloTE-AluSx3	2.13125e-07	FALSE	Interneuron_M1	38.8975	43.156
0.238418	0.222542	0.097	0.078	1	DS_vs_CTL	SoloTE-MLT2B2	0.277035	FALSE	Interneuron_M1	0.146069	0.250657
1.22372e-07	0.220374	0.671	0.557	0.000132407	DS_vs_CTL	SoloTE-AluSq4	5.53191e-07	FALSE	Interneuron_M1	2.82101	3.00094
0.169499	0.219546	0.084	0.066	1	DS_vs_CTL	SoloTE-AluYk12	0.206401	FALSE	Interneuron_M1	0.151677	0.141191
0.177441	0.219431	0.116	0.094	1	DS_vs_CTL	SoloTE-Charlie9	0.215278	FALSE	Interneuron_M1	0.173998	0.229336
0.0190493	0.217722	0.129	0.099	1	DS_vs_CTL	SoloTE-LTR54	0.0303685	FALSE	Interneuron_M1	0.257588	0.322426
0.000450686	0.216836	0.177	0.127	0.487642	DS_vs_CTL	SoloTE-LTR13	0.00111824	FALSE	Interneuron_M1	0.355393	0.360475
0.37365	0.214765	0.089	0.073	1	DS_vs_CTL	SoloTE-L5	0.413081	FALSE	Interneuron_M1	0.168676	0.184983
0.0273362	0.198917	0.084	0.061	1	DS_vs_CTL	SoloTE-MER70B	0.0418605	FALSE	Interneuron_M1	0.0863546	0.085071
3.47777e-06	0.197169	0.426	0.336	0.00376295	DS_vs_CTL	SoloTE-Charlie2b	1.25428e-05	FALSE	Interneuron_M1	0.963731	1.1796
0.0447714	0.196758	0.056	0.038	1	DS_vs_CTL	SoloTE-LTR2B	0.0639591	FALSE	Interneuron_M1	0.096315	0.108743
0.0206211	0.194945	0.065	0.045	1	DS_vs_CTL	SoloTE-LTR61	0.0326427	FALSE	Interneuron_M1	0.107909	0.108054
2.64789e-05	0.18967	0.709	0.617	0.0286502	DS_vs_CTL	SoloTE-AluYe5	8.24343e-05	FALSE	Interneuron_M1	2.93684	2.89195
0.608252	0.186281	0.126	0.119	1	DS_vs_CTL	SoloTE-LTR37B	0.633196	FALSE	Interneuron_M1	0.20655	0.241694
0.513997	0.18559	0.069	0.059	1	DS_vs_CTL	SoloTE-MamGypLTR3	0.545399	FALSE	Interneuron_M1	0.140174	0.149994
0.160024	0.185266	0.111	0.09	1	DS_vs_CTL	SoloTE-MER72B	0.195947	FALSE	Interneuron_M1	0.123862	0.0738831
3.42572e-05	0.184227	0.094	0.059	0.0370663	DS_vs_CTL	SoloTE-Kanga11a	0.000102307	FALSE	Interneuron_M1	0.150663	0.193887
3.29417e-05	0.179986	0.172	0.12	0.0356429	DS_vs_CTL	SoloTE-MamRep38	9.92764e-05	FALSE	Interneuron_M1	0.313631	0.40109
3.7608e-06	0.175899	0.319	0.246	0.00406918	DS_vs_CTL	SoloTE-Charlie2a	1.34169e-05	FALSE	Interneuron_M1	0.644352	0.788803
0.00250561	0.168988	0.238	0.186	1	DS_vs_CTL	SoloTE-LOR1-int	0.00521673	FALSE	Interneuron_M1	0.218008	0.356546
0.000707835	0.165108	0.083	0.054	0.765878	DS_vs_CTL	SoloTE-LTR47A	0.0016988	FALSE	Interneuron_M1	0.118944	0.135639
0.129514	0.163922	0.053	0.039	1	DS_vs_CTL	SoloTE-PABL-B-int	0.164068	FALSE	Interneuron_M1	0.0726354	0.0782708
0.624526	0.150363	0.082	0.072	1	DS_vs_CTL	SoloTE-LTR16B2	0.648093	FALSE	Interneuron_M1	0.108042	0.139605
2.46387e-05	0.150292	0.354	0.283	0.026659	DS_vs_CTL	SoloTE-MER41A	7.81804e-05	FALSE	Interneuron_M1	0.89402	0.931704
0.00102329	0.150082	1	0.999	1	DS_vs_CTL	SoloTE-AluSz6	0.00233692	FALSE	Interneuron_M1	52.8738	60.3358
0.0424739	0.126678	0.145	0.118	1	DS_vs_CTL	SoloTE-MER31B	0.0612069	FALSE	Interneuron_M1	0.205164	0.27706
0.204042	0.125193	0.07	0.058	1	DS_vs_CTL	SoloTE-LTR48	0.242562	FALSE	Interneuron_M1	0.118523	0.172519
0.152023	0.124984	0.135	0.111	1	DS_vs_CTL	SoloTE-MER92-int	0.187543	FALSE	Interneuron_M1	0.210533	0.270906
0.401218	0.123839	0.118	0.103	1	DS_vs_CTL	SoloTE-MamRep1151	0.439144	FALSE	Interneuron_M1	0.180515	0.29402
0.0229582	0.122759	0.244	0.204	1	DS_vs_CTL	SoloTE-MER57A-int	0.0359317	FALSE	Interneuron_M1	0.49142	0.622162
1.0171e-06	0.12075	0.836	0.746	0.0011005	DS_vs_CTL	SoloTE-AluYj4	4.0439e-06	FALSE	Interneuron_M1	4.99139	4.8426
0.0457977	0.12067	0.172	0.143	1	DS_vs_CTL	SoloTE-Tigger9b	0.065284	FALSE	Interneuron_M1	0.363572	0.434086
1.80363e-09	0.118558	0.604	0.489	1.95153e-06	DS_vs_CTL	SoloTE-AluSq10	9.75734e-09	FALSE	Interneuron_M1	2.34918	2.44734
0.000123945	0.118556	0.742	0.665	0.134109	DS_vs_CTL	SoloTE-Tigger3b	0.000343714	FALSE	Interneuron_M1	3.18241	3.91064
0.0144706	0.106	0.999	1	1	DS_vs_CTL	SoloTE-AluJr	0.0239965	FALSE	Interneuron_M1	65.0634	72.5239
3.52752e-09	0.105635	0.575	0.47	3.81678e-06	DS_vs_CTL	SoloTE-AluYk4	1.86253e-08	FALSE	Interneuron_M1	1.84764	1.95631
0.587083	0.10426	0.157	0.142	1	DS_vs_CTL	SoloTE-Charlie29a	0.613093	FALSE	Interneuron_M1	0.32753	0.439973
0.932806	0.103813	0.051	0.048	1	DS_vs_CTL	SoloTE-MamRep1527	0.937065	FALSE	Interneuron_M1	0.071153	0.0970086
0.00144044	0.102991	0.456	0.393	1	DS_vs_CTL	SoloTE-MamSINE1	0.00316896	FALSE	Interneuron_M1	0.834092	1.13486
0.000855316	0.0948067	0.917	0.869	0.925452	DS_vs_CTL	SoloTE-Tigger1	0.0020018	FALSE	Interneuron_M1	6.52378	8.70001
0.000743084	0.0938445	0.255	0.201	0.804017	DS_vs_CTL	SoloTE-MER65-int	0.00177694	FALSE	Interneuron_M1	0.541008	0.613814
4.76226e-07	0.0897334	0.626	0.528	0.000515276	DS_vs_CTL	SoloTE-AluYk3	2.00161e-06	FALSE	Interneuron_M1	2.30684	2.38561
1.37854e-05	0.0893244	0.1	0.066	0.0149158	DS_vs_CTL	SoloTE-MER9a3	4.61846e-05	FALSE	Interneuron_M1	0.188412	0.189048
0.123284	0.0884907	0.072	0.059	1	DS_vs_CTL	SoloTE-MER34B	0.157384	FALSE	Interneuron_M1	0.127162	0.147911
0.505992	0.0882848	0.065	0.056	1	DS_vs_CTL	SoloTE-LTR40b	0.538637	FALSE	Interneuron_M1	0.110922	0.140168
3.18579e-05	0.0866548	0.262	0.196	0.0344702	DS_vs_CTL	SoloTE-AluYd8	9.64504e-05	FALSE	Interneuron_M1	0.614071	0.590844
0.0286337	0.0865075	0.369	0.326	1	DS_vs_CTL	SoloTE-Tigger13a	0.0435443	FALSE	Interneuron_M1	0.923066	1.21468
0.0926517	0.0863826	0.068	0.051	1	DS_vs_CTL	SoloTE-LTR52	0.122545	FALSE	Interneuron_M1	0.115389	0.184328
0.376382	0.0851682	1	1	1	DS_vs_CTL	SoloTE-AluJb	0.414711	FALSE	Interneuron_M1	115.367	130.694
0.639116	0.0819818	0.069	0.061	1	DS_vs_CTL	SoloTE-LTR48B	0.661155	FALSE	Interneuron_M1	0.105601	0.143661
0.000757815	0.0817856	0.217	0.173	0.819956	DS_vs_CTL	SoloTE-MLT1G	0.00179913	FALSE	Interneuron_M1	0.323835	0.474366
0.424277	0.0797535	0.07	0.061	1	DS_vs_CTL	SoloTE-MER90	0.461323	FALSE	Interneuron_M1	0.139703	0.188923
0.0207856	0.0791074	0.178	0.147	1	DS_vs_CTL	SoloTE-MLT1H1	0.0328194	FALSE	Interneuron_M1	0.392763	0.511931
0.23061	0.0766429	0.105	0.088	1	DS_vs_CTL	SoloTE-AluYi6-4d	0.268909	FALSE	Interneuron_M1	0.177295	0.175146
0.0234346	0.0740151	0.175	0.147	1	DS_vs_CTL	SoloTE-LTR17	0.0364785	FALSE	Interneuron_M1	0.425704	0.510762
0.00385014	0.0702189	0.396	0.348	1	DS_vs_CTL	SoloTE-L1ME5	0.00745188	FALSE	Interneuron_M1	0.731216	1.28463
0.146978	0.0684317	0.139	0.12	1	DS_vs_CTL	SoloTE-Looper	0.182685	FALSE	Interneuron_M1	0.293457	0.369413
0.00011626	0.063174	0.221	0.174	0.125793	DS_vs_CTL	SoloTE-MER4E1	0.000324126	FALSE	Interneuron_M1	0.360474	0.472261
0.120673	0.0575475	0.121	0.105	1	DS_vs_CTL	SoloTE-MER63B	0.154349	FALSE	Interneuron_M1	0.207266	0.335563
0.0566925	0.0559171	0.286	0.255	1	DS_vs_CTL	SoloTE-LTR81B	0.0787728	FALSE	Interneuron_M1	1.16942	1.21531
0.0292163	0.0539482	0.171	0.145	1	DS_vs_CTL	SoloTE-MER63D	0.0443282	FALSE	Interneuron_M1	0.245603	0.289956
0.272505	0.0531732	0.938	0.921	1	DS_vs_CTL	SoloTE-AluYa5	0.313333	FALSE	Interneuron_M1	8.87736	9.16109
0.0134027	0.0528839	0.154	0.126	1	DS_vs_CTL	SoloTE-MER34A	0.0224512	FALSE	Interneuron_M1	0.280805	0.345006
0.0758127	0.0504733	0.145	0.126	1	DS_vs_CTL	SoloTE-MER5C	0.101907	FALSE	Interneuron_M1	0.392486	0.505322
0.00541505	0.0471525	0.1	0.076	1	DS_vs_CTL	SoloTE-MER74B	0.010011	FALSE	Interneuron_M1	0.12656	0.194948
0.0164286	0.046876	0.276	0.24	1	DS_vs_CTL	SoloTE-MER41B	0.0267066	FALSE	Interneuron_M1	0.572589	0.705249
0.000324549	0.043939	0.287	0.243	0.351162	DS_vs_CTL	SoloTE-Plat-L3	0.00084001	FALSE	Interneuron_M1	0.505001	0.65149
0.991063	0.041045	1	1	1	DS_vs_CTL	SoloTE-AluJo	0.991063	FALSE	Interneuron_M1	59.3541	65.8885
0.268449	0.0390234	0.109	0.095	1	DS_vs_CTL	SoloTE-LTR49	0.309208	FALSE	Interneuron_M1	0.21008	0.263053
0.00836578	0.0385753	0.12	0.092	1	DS_vs_CTL	SoloTE-LTR6A	0.0146846	FALSE	Interneuron_M1	0.17602	0.185612
0.00870904	0.0356261	0.177	0.146	1	DS_vs_CTL	SoloTE-MER31-int	0.0151262	FALSE	Interneuron_M1	0.395781	0.422483
0.807028	0.031626	0.111	0.105	1	DS_vs_CTL	SoloTE-AmnSINE1	0.814371	FALSE	Interneuron_M1	0.192393	0.316409
0.745438	0.0279368	0.061	0.056	1	DS_vs_CTL	SoloTE-LTR24C	0.761593	FALSE	Interneuron_M1	0.125958	0.135494
0.0188429	0.0268441	0.053	0.038	1	DS_vs_CTL	SoloTE-MER65D	0.0301121	FALSE	Interneuron_M1	0.0436673	0.0550809
0.00365201	0.0264003	0.16	0.129	1	DS_vs_CTL	SoloTE-HERV4-I-int	0.00715231	FALSE	Interneuron_M1	0.311635	0.348292
0.551242	0.0261372	0.066	0.059	1	DS_vs_CTL	SoloTE-Tigger12	0.580254	FALSE	Interneuron_M1	0.153177	0.209788
0.00483336	0.0246529	0.184	0.151	1	DS_vs_CTL	SoloTE-HERV35I-int	0.00914046	FALSE	Interneuron_M1	0.321968	0.355005
0.0768077	0.0220264	0.094	0.08	1	DS_vs_CTL	SoloTE-HUERS-P3b-int	0.103035	FALSE	Interneuron_M1	0.0995962	0.25232
[truncated: 511 more rows]

## Sheet: Interneuron_M2
p_val	avg_log2FC	pct.1	pct.2	p_val_adj	comparison	gene	FDR	sig	cellsubtype	CTL_expression	DS_expression
[truncated: 580 more rows]

## Sheet: Interneuron_S1
p_val	avg_log2FC	pct.1	pct.2	p_val_adj	comparison	gene	FDR	sig	cellsubtype	CTL_expression	DS_expression
[truncated: 509 more rows]

[truncated: 16 more sheets: Interneuron_S2, IP, IP_IN, Layer_2-4_ExN, Layer_4-5_ExN, Layer_4-6_ExN, Layer_5-6_ExN, Microglia_1, NB L2-3 ExN, NB L2-4 ExN, OL, OPC_1, oRG, Vasc_1, Vasc_2, vRG]
