# Supplementary material for: Molecular Cartography of the Human and Mouse Down Syndrome Brain
Source: Research Square preprint supplement (doi:10.21203/rs.3.rs-5374449/v1), 2024-11-14
Supplement: Supplementary file 8 [file f6323d736cb179bfce68c3dd.xlsx]

## Sheet: CTL_Driver_Genes
Cluster 0	Cluster 1	Cluster 2	Cluster 3	Cluster 4	Cluster 5	Cluster 6	Cluster 7	Cluster 8	Cluster 9	Cluster 10	Cluster 11	Cluster 12	Cluster 13	Cluster 14	Cluster 15	Cluster 16	Cluster 17	Cluster 18	Cluster 19	Cluster 20
UNC5D	DSCAM	LIMCH1	YAP1	RUNX1T1	PRICKLE2	GAD2	DLEU2	AC004158.1	SLC22A23	AC004158.1	ABLIM1	TENM3	MIR924HG	GAS2L3	PTN	OLFM3	DYNC1I1	PPP2R2B	ADAMTS9	PLXDC2
DPY19L1	RBFOX1	DSCAM	QKI	SLAIN1	DOK5	NRXN3	ZBTB20	IGSF21	CACNA2D1	KIAA1217	LINC01821	CCSER1	PALLD	DLEU2	LRRC4C	SGCD	ROBO2	SH3D19	DOCK1	IKZF1
KCNQ3	SLA	RBFOX1	MEGF10	NRXN3	AC011474.1	GRIP2	BRIP1	DPP10	NFIA	FAM160A1	LUZP2	FRAS1	MELK	IQGAP3	ADAMTS6	TMEFF2	KHDRBS2	ALCAM	RAPGEF5	DOCK4
DOK6	SEMA3C	SATB2	DACH1	CADPS	ZNF804B	AL078602.1	EXO1	SYN3	MEIS2	TLE4	DLG2	VCAN	MIR99AHG	ZBTB20	LGR4	CACNA2D3	EFNA5	SEMA5A	RHOJ	HRH1
SORBS2	CUX2	NELL2	MIR99AHG	SYT1	NEBL	EPHA5	COL9A1	SLC35F3	CLMP	JCAD	EPHA6	TENM2	STK3	PARPBP	TCF7L2	ZNF385D	SPHKAP	MAML2	DOCK9	ARHGAP26
AC068931.1	KIAA1324	TMOD1	MAGI2	RIMS2	GRM7	SLIT1	MAGI1	CNTNAP5	LRP8	DAB1	PRR16	AC034111.2	DACH1	SGO1	TGFB2	XKR4	LDB2	CHRM3	UACA	DOCK10
KCTD16	NRP1	SPHKAP	DOK5	PLXNA4	ABLIM1	SDK2	BRCA1	FOXP2	ELAVL2	DMD	PRICKLE2	LDB2	LAMA3	CIT	TFPI	VCAN	NELL2	SGCD	PLEKHG1	MAP3K5
PLXNA2	TMOD1	MYO5B	STK3	GRIA1	FRMD4B	CSMD3	EPHA4	PTPRZ1	SORBS2	SYN3	DOK5	FAT3	DTL	TACC3	GRID2	DPP6	SIAH3	DPP6	CALD1	IGF1
KIAA1324	CACNA1A	LRRC7	TCF7L1	CNTNAP4	THSD7B	KCNH8	SYNE2	CNTN1	TENM4	MTUS2	DPP6	NELL1	SIPA1L1	DLG2	ADAMTS3	FNDC1	DPP6	SULF2	LCP2	LCP2
CUX2	CDH4	GLRA2	DOCK1	LSAMP	SHISA9	GAD1	FREM2	ZNF385B	KIF26B	LINGO2	GLIS3	ANK3	KIF24	UACA	CTXND1	CDH4	CACNA2D3	PTN	PLCB4	ITPR2
ZNF704	EPHA3	PTPRZ1	FOXP1	ZNF536	KCNQ5	NAV3	MMS22L	GRIN2B	ROBO2	PCSK5	CNTNAP3	CARMIL1	ATAD2	CDK1	FAT3	ZNF521	KCNQ5	MDGA2	STK3	LPAR1
SLA	SATB2	ADGRL3	COL27A1	DACH2	ADAMTS9	KITLG	PBX3	MEF2C	MLLT3	POU6F2	PTPRZ1	SLC8A1	FOXP1	ANLN	GLIS3	PCDH11X	GRIN2B	PDE7B	MYO1B	PTPRE
RASGEF1B	TENM4	MCTP1	SIPA1L1	GRIA4	NWD2	KIRREL3	DTL	CDH6	CA12	OPCML	CCBE1	GRM3	YAP1	MIR924HG	MEIS1	FRAS1	MYT1L	TNS3	FOXP1	MAML2
DISP3	DNAH10	FAT3	LAMA1	SLC4A4	ANO3	ERBB4	MED12L	MYT1L	UNC5D	GRIN2B	CACNA1C	PCSK2	GLI3	ZEB1	PIK3C2G	CADPS	C8orf34	CSMD1	NPAS2	ITGB5
MEIS2	PRSS12	FRMD4B	LAMA3	NRCAM	ROBO2	THRB	KIF24	HS3ST4	AC017053.1	CNTN1	DAB1	NTRK2	WDR62	TTK	GAS7	ZNF385B	CNTN1	TMEFF2	ARHGAP18	DIAPH2
CACNA1A	UNC5D	PTPRE	SHROOM3	GAD1	LRRC4C	TMEM123	ZNF704	FRAS1	EPHA3	CSMD3	CDH9	ALCAM	TCF7L1	RTKN2	NTRK2	TENM1	PTPRZ1	ADAMTS3	AC114757.1	SLC8A1
PREX1	ITPR2	ITPR1	ZBTB20	NXPH1	ADAMTSL3	PDZRN3	WDHD1	PCSK5	ZEB1	SH3D19	MCTP1	TENM1	DOCK1	MDFIC	STK33	MEGF11	MCTP1	TMOD1	ARHGAP26	SLC1A3
NTM	LRRC7	NKAIN2	PTPRM	ELFN1	FAM189A1	ST18	GLI2	SLC24A2	PANTR1	CSMD1	NWD2	NETO2	DIAPH3	PRR11	SIPA1L1	KIRREL3	GLRA2	OPCML	HRH1	DHRS3
SLC17A6	HS6ST3	DLGAP2	AKAP12	EFNA5	KLHL14	ZNF536	PANTR1	GREM2	GRAMD1B	UNC13C	CSGALNACT1	KIRREL3	CSMD2	NFIA	SLC1A3	NKAIN2	AC092691.1	ZCCHC24	PDE7B	MIR503HG
DOCK4	OSBPL10	CACNA2D1	GULP1	TENM3	PTPRZ1	ST8SIA5	CENPK	NELL2	SLC17A6	PCSK2	C2orf83	LINC00581	MEGF10	PANTR1	STK3	GLRA2	ANO4	PDZD2	CDH6	FRMD4B
EML6	MEIS2	CCBE1	ATP1A2	KCNC2	CCBE1	FGD3	CHD7	GAS7	PPP2R2B	MEF2C	CELF2	LMO3	GULP1	KIF18B	PLPP3	CCSER1	GREM2	KCNN2	SH3TC1	GAB3
HS3ST1	DPY19L1	AFF3	NPAS3	ASPM	SGCZ	ARX	POLQ	ANKRD33B	KCNQ3	LRP1B	CADPS	SHISA9	MDFIC	MELK	MAGI2	SLC35F3	PRR16	HAS2	PTPRK	ANOS1
ELMO1	HMGCS1	HS6ST3	PARD3B	KCNH8	NELL2	CELF4	NFIA	GRM5	AC099792.1	CALN1	MYT1L	CACNA2D3	IQGAP2	CDCA2	GABRB1	GUCY1A1	GRM3	SGCZ	PALMD	CSGALNACT1
PAG1	LIMCH1	EPHA3	PLPP3	SLC6A1	CALN1	SORCS3	ST6GALNAC5	ROBO2	ARHGAP42	MCTP1	DLGAP2	RYR2	CENPK	CDCA8	PDZRN4	RIMS2	SLCO3A1	SCN1A	PTPRE	SIPA1L2
SLC22A23	PALMD	GREM2	CELSR1	TMEM123	ARHGAP20	DGKB	MIR924HG	DAB1	AC013727.2	NPAS2	LIMCH1	CACNA1C	PRDM16	STK33	C1orf61	KCNN2	NWD2	CADM2	MDFIC	SH3TC1
NRP1	CLMP	MEF2C	AL589740.1	FAM135B	TNR	SEMA5B	MYO3A	SORCS1	ELMO1	PDE1A	LRFN2	ST6GALNAC5	DLEU2	BUB1B	ITGB5	SYT1	AC034111.2	ANK3	CEP112	PREX1
CNTNAP2	GRID2	FLRT2	SAMD4A	SIAH3	FNDC1	TNR	RRM2	LINC02770	ZNF704	FAM189A1	KHDRBS2	GREM2	DOK5	KIF4A	ANOS1	CNTN4	GABRB1	WSCD1	XAF1	SAMD4A
CNR1	CADM2	MYT1L	CFAP54	AC092691.1	NELL1	ST6GALNAC5	ABHD3	NPAS2	TTYH2	TRPM3	NELL1	GRM5	LRP4	NDC80	GULP1	TENM3	ARPP21	ANO3	PON2	GAS7
EPHA3	PLXNA2	LINC01122	CSMD2	PLS3	FOXP1	RIPOR2	STK33	GRM3	CNR1	CARMIL1	TENM1	GUCY1A1	RFC3	NCAPG	SMOC1	PBX3	DAB1	SLC2A13	ITGA6	ZCCHC24
PPP2R2B	ADGRL3	EPHA6	EPB41L4A	THSD7B	CHRM3	DLX6-AS1	CDK6	ATP2C2	RASGRP1	MYO5B	SLCO3A1	CNTNAP5	ABHD3	NEIL3	TTYH1	ALCAM	CADM2	GRIN2A	SLC7A11	PAG1
CLMP	KCNQ3	DOK5	TCF7L2	BMP3	DLGAP2	DPP6	WDR62	TMEM178A	ZFHX4	OCA2	NEBL	KCTD16	WWTR1	YAP1	RFX4	LRRC4C	DSCAM	TGFB2	EPB41L4A	SAT1
GRAMD1B	DOCK4	GRID2	ADGRV1	PDZRN4	CACNA1C	DACH2	GPC6	KCNMA1	AC068931.1	CNTNAP5	PTN	SGCZ	EXO1	ARHGAP11A	PCDH9	CHRM3	AC011474.1	KCNMA1	PDGFRB	CACNA1D
LRP8	HAS2	TAFA1	COL4A6	GAD2	NKAIN2	NR3C2	CNTLN	MYO5B	NTM	KAZN	SHISA9	TMEFF2	FANCI	TOP2A	SPON1	ANOS1	FLRT2	CSMD2	PTPRM	MEF2C
PALMD	COL9A2	SEMA3C	PRDM16	ADAMTS5	RAPGEF5	RIMS2	CCDC150	ADAMTS6	PPP1R17	CACNA2D3	DNAH7	DCC	WDHD1	CDC25C	PPP2R2B	IGSF21	DOK6	CNTN3	MAST4	ARHGAP18
COL9A2	PTPRZ1	GUCY1A2	PLCE1	PDE1A	SLC2A13	MYO3A	ZEB1	ANO4	PLCB4	CACNA1D	CSMD2	SYBU	LTBP1	KIF23	RGS20	TGFB2	TAFA1	ADGRL3	OSBPL10	ADAMTS9
ITPR2	PTPRE	CNTN4	MEIS2	FGD3	GABRB1	PLS3	MYBL1	MCTP1	PLXNA2	ROBO2	GRIN2B	HS3ST5	NOTCH2	WDR62	CEP112	SLC8A1	AFF3	TCF7L1	C2orf83	SP110
SEMA3C	CNTNAP2	GRM7	BMP7	NAV3	SLCO3A1	NPAS1	SOX1-OT	PEX5L	SIPA1L2	KHDRBS3	ANO3	CALN1	UTRN	EPHA4	NFIA	PAPPA2	PCDH11Y	CSMD3	KITLG	ELMO1
AC013727.2	MYO5B	SYBU	PLEKHG1	TENM2	CACNA1D	DCLK2	KCNN2	KAZN	ZBTB20	PTPRZ1	RAPGEF5	PCDH11X	MAST4	CENPF	WSCD1	CEP112	CLSTN2	ARHGAP42	CSGALNACT1	KCNQ3
DSCAM	HELLS	SYT1	PALLD	LINC02397	CELF2	PRKCA	MELK	MDGA2	THSD7A	PDE7B	ITPR1	TSHZ2	SYNE2	ECT2	DPP6	GUCY1A2	SULF2	GRIK2	FAM189A1	TCF7L2
TMOD1	AC013727.2	ARPP21	MGAT4C	PLA2R1	LRFN2	SYT1	E2F2	AC034111.2	PREX1	HS3ST5	SLC26A4	LINGO2	POLQ	PRDM16	GRIK1	MLLT3	CNTNAP5	LRRTM3	PPFIBP1	IL6R
KCNJ6	AFF3	PRSS12	RHOJ	GRIK3	OPCML	STXBP5L	E2F7	PCDH7	ITPR2	MDGA2	SLC2A13	SYT10	LRP2	KIF11	LRIG1	DOK5	LRRC7	TCF7L2	IL6R	MIS18BP1
THSD7A	LSAMP	CUX2	MSI2	TENM1	MYT1L	SOX6	SIPA1L1	MEGF11	KCTD16	FAM135B	FLRT2	SFRP1	ANGPT1	NUF2	COBL	SYT10	DOCK10	KLHL14	ZFP36L1	HMGCS1
MLLT3	PREX1	DPP6	TNS1	GRIP2	CNTN4	SLAIN1	RTKN2	GRIK3	PTPRM	OLFM3	ZNF804B	LINC01122	DIAPH2	CEP55	QKI	GRM3	FOXP1	SHISA9	ABHD3	ZFP36L1
SLC24A2	SPHKAP	OSBPL10	GRIN2A	CEMIP2	PCDH11X	MAGI1	CIT	UNC13C	MEGF10	CDH10	CALN1	AC109466.1	NPAS3	FOXN4	WDR49	DCC	CDH6	GNAL	TCF7L1	CEMIP2
KCNH8	SOX5	CDH4	NOTCH2	SOX1-OT	CSGALNACT1	BCL11B	DIAPH3	HS3ST5	ANK3	MLIP	PCSK2	GRIK3	IL33	KIF2C	KIRREL3	SGCZ	KIRREL3	MEGF11	MIR503HG	NDE1
RBFOX1	VIPR2	RUNX1T1	ZEB1	MOB3B	LINGO2	PCDH9	DGKB	EFNA5	AC006296.3	SLC24A2	CENPF	LRRC4C	FREM2	STK3	PCDH7	PCDH7	NAV3	NR3C2	CREB5	TLE4
TENM4	CACNA2D1	GRIK1	COL4A5	XKR4	NECAB1	ZBTB16	FGD3	OCA2	SEMA5B	FRAS1	CNTN4	SLC4A4	CHST9	KIF15	MEGF10	GABRG3	GUCY1A2	CNTN1	DIAPH2	QKI
TTYH2	CDHR3	VCAN	HEG1	ST8SIA5	GRIN2B	SLC6A1	AC099792.1	OPCML	SMOC1	ANKRD33B	MYO5B	ANO3	SHROOM3	KIF24	PON2	NTRK2	ABLIM1	CTXND1	PRICKLE2	SLC2A13
FGFR2	COL1A2	ADGRB3	DIAPH2	CCSER1	SEMA3E	COBL	FANCI	LRP1B	SYNE2	DPP10	GRM7	GRM7	SAMD4A	GLI2	RGS6	SYN3	CSMD3	SLC6A1	PDE8B	CDK6
LINC01122	NETO2	COL1A2	LTBP1	PDGFD	MDGA2	SLC4A4	DHRS3	CARMIL1	NRN1	CDH6	TAFA1	KCNN2	GLI2	NDE1	CSGALNACT1	PTPRK	AC109466.1	NTNG1	SYNE2	ZFHX3
NRN1	GRIK1	ARHGAP44	DAAM2	LHX6	COL12A1	CEMIP2	SEMA5B	GNAL	SLC1A3	CADPS	TMEFF2	ARPP21	SOX5	MMS22L	PTPRT	VIPR2	UNC13C	DLG2	DOCK4	TNS3
CDH4	XAF1	PLXNA4	KCNMA1	STXBP5L	GREM2	ZNF704	BLM	SHISA9	MED12L	LRFN2	DYNC1I1	MEF2C	E2F2	MAGI1	NCKAP5	UNC5C	CSMD1	TFPI	TFPI	PRKCA
FUT9	SAT1	PCDH7	FUT9	ARX	SIAH3	CALB2	RFC3	DYNC1I1	DOK6	ABI3BP	SYBU	ZNF521	PLCE1	FOXP1	DOCK10	NELL1	PCDH7	DSCAM	ZNF521	LGR4
PLCB4	PPP2R2B	TENM4	GLI2	RIPOR2	CDHR3	PROX1	UTRN	KIAA1217	AL589740.1	COL25A1	GUCY1A2	SPHKAP	AKAP12	PTPRK	DCDC1	SULF2	ZNF804B	ZEB1	ANO3	TFEC
SLC8A1	GRAMD1B	CACNA1C	LRP4	GRID2	ALCAM	SOX1-OT	CHST9	ABLIM1	NLGN1	LRRTM3	NKAIN2	GABRB1	PLEKHG1	SMC4	ATP13A4	HS6ST3	GRM7	NELL1	AL137139.2	STK3
DNAH10	ZGRF1	DAB1	IL33	KITLG	DYNC1I1	NPAS3	STK3	CADPS	DISP3	KCNJ6	MEF2C	SLC35F3	QKI	QKI	FSTL1	PPP1R17	SLC8A1	GRIK1	FOS	EZH2
PTPRM	ZFP36L2	ABLIM1	ANGPT1	SP9	SDK2	MEIS1	YAP1	SLCO3A1	NPR 3.00	SIAH3	GABRB1	GLRA2	NTNG1	GULP1	AL137139.2	B3GAT2	SYT1	PLEKHG1	NEBL	CSF3R
GRIA1	DOCK9	CENPF	CREB5	BCL11B	SYN3	ZNF385D	PLXNA2	CACNA1C	PTPRK	SLCO3A1	LMO3	SYT1	MMS22L	CCDC150	GPC4	AC109466.1	PCSK5	MIR503HG	GRM3	LRIG1
RASGRP1	UACA	CCSER1	LINC01965	ZBTB16	MEG3	MOB3B	AL589740.1	FAM135B	ADGRV1	KHDRBS2	MDGA2	SATB2	MGAT4C	KIF14	GRM3	SLC6A1	GRID2	CENPU	ITGA2	ITGA6
ZFHX4	CCBE1	LSAMP	MAST4	DGKB	PTPRE	PDZRN4	DLX6-AS1	DOK6	SOX5	GRM5	RYR2	PTPRT	LPAR1	KIF18A	ETV1	SATB2	NKAIN2	TNS1	ITPR2	ITGAM
CADM2	HS3ST1	DNAH10	AC131571.1	EPHA5	CNTNAP3	PCDH17	FAM111B	BACE2	EPB41L4A	CNTNAP3	RORB	CDH9	BRCA1	TCF7L1	ELMO1	LRFN2	COL12A1	TNR	SH3D19	SORCS1
GRID2	CENPF	KIF26B	DLG2	TRPM3	SYBU	NRCAM	MYO1B	TNR	COL4A5	LMO3	TLE1	NPAS2	NTN4	PON2	LPAR1	LMO3	LINC02770	UTRN	TLE1	NOTCH2
CENPF	RUNX1T1	KCNJ6	MDFIC	CNTNAP2	ANO4	THSD7B	AC109466.1	PRICKLE2	COL4A6	MYT1L	TNR	MLLT3	PTPRK	PAX6	AR	UNC13C	PEX5L	TMEM178A	KHDRBS3	ITGAX
PANTR1	ARHGAP44	CADM2	EEPD1	NPAS3	TAFA1	NETO2	KITLG	SH3D19	TMEM132B	IGSF21	PCDH7	GUCY1A2	AHI1	KIF20A	TNS1	SLCO3A1	CSGALNACT1	NLGN1	LIMCH1	PCDH9
SLIT1	ADAMTSL3	LUZP2	ITGA6	ACKR3	ANK3	EPHA4	NEIL3	OSBPL10	CHD7	HS3ST4	SPHKAP	CELF4	KIFC1	DLGAP5	DHRS3	NELL2	PCDH11X	ARAP2	GULP1	UNC5C
TMEM132B	NTM	TMEFF2	BOC	ERBB4	PDZD2	RASGEF1B	DACH1	AFF3	PAX6	DOK6	DOCK9	SCN9A	SEMA5A	SFRP1	NTNG1	HS3ST5	KLHL14	FAM160A1	ADAM33	KHDRBS3
EPHA5	ITPR1	CSMD1	MAP3K5	BRINP2	NTM	PLA2R1	SOX6	ARHGAP44	KCNJ6	GABRG3	GRID2	NGEF	PTPRM	KIFC1	LMO3	GRIN2B	NCKAP5	ZBTB16	DOCK10	ATP13A4
CACNA1D	CDCA8	GAS2L3	LPAR1	ELMO1	CSMD1	QKI	CDC25C	GUCY1A2	CNTN3	CLSTN2	UNC5C	ADGRB3	BMP7	NLGN1	ANGPT1	DCDC1	MDGA2	SIPA1L1	ANGPT2	EOMES
MIS18BP1	SLC8A1	VIPR2	IQGAP2	ETV1	CNTNAP2	NR2F2	PCLAF	PDZD2	MIR99AHG	SHISA9	ANK3	XKR4	FGFR2	PBX3	KCNMA1	MEG3	ANO3	PDZRN4	GAS2L3	ZBTB20
KIF20B	CNTN3	KHDRBS2	HKDC1	DLX1	PTN	LSAMP	KIF26B	GABRG3	PARD3B	ARHGAP44	CDK1	RASGEF1B	DLG2	ZFHX4	NGEF	LRRTM3	HS6ST3	BCAN	GRID2	BRCA2
PDGFRB	GRIK2	TOP2A	DNAH7	PTPRT	ZNF385B	BMP3	MDFIC	KCNQ5	HEG1	C8orf34	PDZD2	LRRTM3	ZBTB20	SEMA5A	BMP7	CDH9	FSTL1	NEBL	EBF1	VCAN
CENPE	MKI67	CENPE	LIPG	PCDH17	GUCY1A2	GLRA2	SGO1	JCAD	ANO4	ARHGAP20	TOP2A	DACH1	COL4A6	FRMD4B	GABRG3	GRM5	FRMD4B	PDE8B	CACNA1C	LINC02397
ROBO2	SMC4	SLCO3A1	ARAP2	SIPA1L2	LIMCH1	GRIK2	GRIK3	RGS6	SLC24A2	GNAL	CHRM3	KCNMA1	NDC80	CKAP2	DGKB	SAMD4A	PDE1A	PCDH11Y	ZNF804B	TMEM178A
ARPP21	ZFHX3	CDK1	SLC8A1	OLFM3	SLC26A4	FREM2	HEG1	NTRK2	CRHR2	CSGALNACT1	COL1A2	PCDH11Y	CELSR1	TPX2	MDFIC	SPON1	DOK5	GRM3	SLC38A11	NRP1
XAF1	SORBS2	APOLD1	SEMA5A	ELAVL2	MCTP1	PCDH11X	FOXP2	POU6F2	FOXP2	ANK3	NELL2	NELL2	ATP1A2	MKI67	CHST9	NETO2	ADAMTS6	PTPRT	CARMN	SYNE2
SEMA5B	APOLD1	GTSE1	DCDC1	AC017053.1	GUCY1A1	PLXNA4	QKI	LDB2	MAGI1	HS6ST3	SPON1	IKZF1	ANOS1	PRC1	LRP2	KLHL14	EPHA6	LRP4	PLA2R1	KIF14
LRRC7	SLC22A23	SLC8A1	ITGA2	ADGRL3	DAB1	SLC2A13	AC017053.1	CSMD1	PLCE1	CDH18	RYR3	THSD7B	UACA	MIR99AHG	TIMP3	EFNA5	MEGF11	PCDH7	TLE4	UTRN
CACNA2D1	GLRA2	AC013727.2	RFX4	NELL1	CENPF	CHD7	CEP152	CLSTN2	HS3ST1	THSD7A	SAT1	POU6F2	VEPH1	FSTL1	NRCAM	MDFIC	KCNN2	FRMD4B	MEF2C	TNC
DCC	DMD	HES1	GLI3	FAM189A1	CDK1	MSI2	MOB3B	LINGO2	GULP1	RYR3	ZNF385B	FLRT2	E2F7	AURKB	FOXP1	LRRC3B	LINC01821	DCLK2	DAAM2	PEX5L
PPP1R17	FLRT2	EBF1	VCAN	NPAS1	CDH10	ELMO1	CEMIP2	PLEKHH2	SEL1L3	EFNA5	RBFOX1	BCL11B	RHOJ	MYBL1	B3GAT2	RASGEF1B	LUZP2	DGKB	SATB2	COL1A2
MSI2	TTYH2	PPFIBP1	CHST9	QKI	DPP6	CCSER1	ZFHX4	DMD	PON2	PDE8B	CKAP2	PIK3C2G	B3GAT2	CEP152	TAFA1	CACNA1C	FOXP2	DOCK9	SIPA1L1	ABHD3
CSMD2	DLC1	CACNA1A	COL11A1	CELF4	CADPS	LHX6	EZH2	ARHGAP20	EOMES	AC034111.2	TPX2	HS3ST4	MCM10	NOTCH2	EGFR	LINC00581	CALN1	B3GAT2	COL12A1	CENPF
KIF14	TOP2A	MKI67	FGFR2	EPHA6	LDB2	PBX3	NRXN3	BCL11B	EZH2	BACE2	ADAMTS9	IGSF21	KIF15	CKAP2L	SP110	PTN	TENM1	CLSPN	PLCE1	PROX1
LSAMP	ANGPT2	CCDC175	SEL1L3	TMEFF2	C8orf34	SIPA1L2	ARHGAP42	PDE8B	AL512590.3	NLGN1	TIMP3	CNTNAP2	CIT	TCF7L2	PTPRK	PAG1	DIAPH2	PARPBP	APOLD1	EBF1
SAT1	FAT3	SLA	TLE1	SOX6	HS3ST5	MED12L	BRCA2	MEG3	TMEM132D	ANO4	SYNE2	CFAP54	MED12L	AC099792.1	MEGF11	GRIA1	SHISA9	TPX2	PREX2	PAPPA2
UACA	AHI1	EZH2	WDR49	PDZRN3	C2orf83	ADGRL3	ST18	CACNA1D	HMGCS1	ATP2C2	AC011474.1	GRIN2B	GPC4	CENPK	LIFR	CACNA1D	THSD7B	ANGPT2	GTSE1	SCN1A
ZFHX3	FRMD4B	GRM3	UTRN	PROX1	PPFIBP1	CDH10	ATAD2	ANK3	GPC6	GRIK3	LINGO2	CEP112	LAMA1	RRM2	PDZD2	PCDH11Y	KIAA1217	GAS2L3	LSAMP	UNC13C
ELAVL2	UNC5C	GUCY1A1	ATP13A4	NETO2	RSPO3	GRIA1	DCLK2	DOCK10	PCDH7	SLC35F3	ALCAM	CNTN4	MRC2	GPC4	DOK5	GRIK3	RYR2	RASGEF1B	FRAS1	SPATA6
CCN1	AL512590.3	KCNQ5	ITGB5	NTN4	SYT1	AC092691.1	KIF15	CALN1	ADGRB3	NELL2	LRRC3B	XAF1	DAAM2	COL4A5	ARHGAP18	GRM7	TNR	PALLD	ADAMTSL3	COL27A1
FOS	DLX1	CELF2	ABHD3	MAML2	IGSF21	ITGA6	ANLN	ADAMTSL3	EML6	PRICKLE2	ANO4	MED12L	DHRS3	CENPE	SFRP1	CLSTN2	KHDRBS3	PROX1	ARHGAP42	GAS2L3
HES1	PPFIBP1	PPP2R2B	CNTN3	PAPPA2	PCSK2	DYNC1I1	SOX5	TENM1	ZFP36L1	DCC	NUSAP1	PDE7B	ZEB1	TROAP	PPP1R17	NFIA	CHRM3	KAZN	DLG2	KIFC1
EGFR	DLX5	ZFHX3	GLIS3	ZNF385D	KHDRBS2	VCAN	FUT9	LMO3	ANGPT2	SLIT1	ECT2	MGAT4C	ITGA6	FOXP2	TCF7L1	MDGA2	MYO5B	PLXDC2	PLPP3	KIF11
NDE1	TLE1	CLU	LRP2	SCN9A	PTPRK	CACNA1C	NDC80	SLIT1	GLI2	SORCS1	TGFB2	NECAB1	KAZN	NUSAP1	CHD7	SHISA9	MAGI2	ST18	NTRK2	KIF18A
HELLS	ARHGAP18	GRIK2	STK33	ANO4	GRID2	ANGPT2	TACC3	FAM189A1	CDK6	TENM1	PCLAF	OSBPL10	GRIN2A	FREM2	ITGA2	SDK2	ARAP2	SPATA6	QKI	ESCO2
EBF1	KCNJ6	PEX5L	NTNG1	AC034111.2	RYR2	TMEFF2	FOXP1	COL1A2	UNC5C	CNTNAP4	SGCD	PDE8B	PARD3B	MGAT4C	TNC	SYBU	DMD	ECT2	NUSAP1	GTSE1
ARHGAP18	ADAMTS5	CHRM3	CNTLN	SDK2	POU6F2	ZBTB20	IQGAP3	C8orf34	SMC4	GUCY1A1	SYT1	OPCML	AC109466.1	PLPP3	DOCK1	PCSK2	SGCZ	ADAM33	GLIS3	HS3ST4
CKAP2	SLC24A2	TROAP	ZFHX4	CSMD3	KCNMA1	PLEKHH2	CENPU	CACNA2D3	COL1A2	ZNF385B	TNC	PTN	ARHGAP42	CREB5	SATB2	PARPBP	COL25A1	GRIK3	HEG1	PLCE1
NKAIN2	FOS	KIF14	PREX2	GAS7	HELLS	BCAN	RORB	MTUS2	NRCAM	CDH9	CLU	ZFHX3	FAT3	LSAMP	TLE4	TFEC	TNS3	IQGAP3	ARAP2	GLRA2
COL1A2	ITGAM	PRC1	GPC4	COL11A1	ITPR1	EZH2	CKAP2L	THSD7A	MSI2	GRID2	ADAMTSL3	AR	ITGA2	APOLD1	CDH4	NXPH1	LRP4	SCN9A	UTRN	GUCY1A1
ITGAX	HES1	RYR2	SLC7A11	DLX6	DCC	DLX1	NUSAP1	CSMD3	FSTL1	RYR2	KCNQ5	PRICKLE2	MAGI2	CCDC18	NEBL	ARPP21	COL1A2	SEMA3E	PCLAF	AHI1

## Sheet: DS_Driver_Genes
Cluster 0	Cluster 1	Cluster 2	Cluster 3	Cluster 4	Cluster 5	Cluster 6	Cluster 7	Cluster 8	Cluster 9	Cluster 10	Cluster 11	Cluster 12	Cluster 13	Cluster 14	Cluster 15	Cluster 16	Cluster 17	Cluster 18	Cluster 19	Cluster 20
DOK6	SEMA3C	LIMCH1	PLPP3	GRIA4	LRRC4C	CELF4	NFIA	DPP10	CA12	AC004158.1	PTPRD	RYR2	PLPP3	UACA	NTRK2	PCDH15	PTPRD	CSMD1	RAPGEF5	MAML2
UNC5D	EPHA3	PLXNA4	LTBP1	SLC6A1	PRICKLE2	ST8SIA5	ZBTB20	EFNA5	NFIA	TLE4	FOXP1	NPAS2	UTRN	AC131571.1	PTPRZ1	CDH18	PEX5L	PDZD2	UTRN	PLXDC2
CLMP	SATB2	SATB2	ZBTB20	TENM2	PTPRD	THRB	RRM2	GRM3	UNC5D	KIAA1217	DLG2	FAT3	MRC2	NFIA	ADAMTS6	ANK3	DAB1	CTXND1	DOCK9	ITPR2
SLA	CUX2	LRRC7	QKI	RIMS2	RAPGEF5	SLC6A1	ATAD2	GAS7	CLMP	SLIT3	PCSK2	CDH9	KCNMA1	SFRP1	MAML2	ZNF385D	MYT1L	SCN1A	PPFIBP1	IKZF1
DPY19L1	SLA	ITPR1	SAMD4A	GRIA1	NELL2	ARX	ELAVL2	KAZN	SMOC1	DAB1	EPHA6	SPHKAP	SHROOM3	KIF14	SLC1A3	LRP1B	ZNF804B	TNR	FOXP1	SLC8A1
PLXNA2	CDH4	SPHKAP	SHROOM3	SOX6	MYT1L	ADARB2	AHI1	CNTN1	AC006296.3	MLIP	CELF2	GPR149	COL9A1	TOP2A	NPAS3	GRID2	LSAMP	CHRM3	XAF1	MIR503HG
ZNF704	UNC5D	ARPP21	MAST4	PTPRT	ZNF804B	RIPOR2	ZNF704	OPCML	ELAVL2	OPCML	SYBU	CNTNAP5	AHI1	ZBTB20	GPC5	CSMD1	RYR3	PTPRZ1	NPAS2	QKI
SEMA3C	NRP1	FRMD4B	COL4A6	ASPM	CNTN4	SORCS3	POLQ	AC004158.1	TTYH2	BACE2	NELL2	OPCML	QKI	SHROOM3	TNC	HTR2C	NWD2	NTNG1	PDZD2	TLE4
NRP1	CLMP	AFF3	BMP7	CNTNAP4	DLGAP2	NRXN3	BRIP1	HS3ST4	CACNA2D1	KHDRBS3	ARPP21	ANK3	RGS20	RRM2	GRIK1	RIMS2	PDZD2	LSAMP	PTPRK	ZFHX3
LRP8	DNAH10	CCSER1	LINC01965	GRIK3	MEF2C	TNR	PBX3	SORCS1	PLXNA2	GRID2	LIMCH1	UTRN	PARD3B	TPX2	DOCK10	DAB1	ABLIM1	SULF2	UACA	MEF2C
CACNA1A	TENM4	FAT3	PARD3B	RUNX1T1	CCBE1	ZBTB16	SEMA5B	LINC02770	ZBTB20	UNC13C	ABLIM1	NTRK2	POLQ	LRRC3B	DCLK2	CNTNAP5	CNTN1	CNTNAP5	PREX2	DOCK10
NTM	PLXNA4	SYT1	GLI3	CNTNAP2	ADAMTSL3	GRIA1	NUSAP1	ATP2C2	ZNF704	GRM5	PRICKLE2	PDZD2	KIF18B	NRCAM	PARD3B	CNTNAP4	ANK3	LRP1B	BACE2	SLC1A3
KCNJ6	PRSS12	SLC8A1	AC131571.1	NRXN3	ARHGAP20	GRIK2	PAX6	OCA2	NRN1	TRPM3	MEF2C	RAPGEF5	LTBP1	AC004158.1	PDZD2	TENM2	COL12A1	TMEM132D	GPC5	FRMD4B
CNR1	DPY19L1	NELL2	LRIG1	BRINP2	CNTN1	NPAS3	LRP8	KCNMA1	CNR1	GABRG3	DLGAP2	COL25A1	NFIA	QKI	SPON1	CDH9	SULF2	PCDH17	SLC6A1	SPATA6
EML6	PLXNA2	DLGAP2	FSTL1	LSAMP	ARPP21	RIMS2	SYNE2	ZNF385B	NPR 3.00	LMO3	TAFA1	NGEF	BLM	DLGAP5	ARAP2	EPHA6	MEF2C	LRRTM3	ITPR2	CSGALNACT1
DISP3	CACNA2D1	CUX2	NFIA	NRCAM	TAFA1	PBX3	BLM	ARPP21	TENM4	HS3ST4	RYR2	MYT1L	PLCE1	BLM	UTRN	CCSER1	LRP1B	CSGALNACT1	QKI	GAS7
MLLT3	SPHKAP	CDH4	C1orf61	GAD1	GRID2	ZNF704	NRCAM	DLG2	LRP8	PDE8B	LUZP2	GNAL	FAT3	ZFP36L2	KCNMA1	TMEM132D	C8orf34	CDH10	ZFP36L1	CHD7
CNTNAP2	CACNA1A	CCBE1	COL4A5	RIPOR2	RSPO3	ERBB4	SMOC1	RGS6	EPHA3	CDH18	LRRC4C	SLC4A4	IQGAP2	AHI1	PCDH9	RYR3	GRM5	PCDH11Y	PALMD	EEPD1
CUX2	MEIS2	GUCY1A2	UTRN	XKR4	NWD2	MOB3B	COL4A5	GRIK3	PTPRD	KAZN	FLRT2	BCL11B	BMP7	KIF18B	QKI	ABLIM1	PCDH17	HAS2	DLC1	AFF3
MEIS2	SLC8A1	DAB1	LRRC3B	GRIK2	C8orf34	SEMA5B	COL4A6	MYT1L	ZBTB16	OCA2	ADAMTSL3	SORCS3	MAST4	PIF1	CTXND1	DLG2	AFF3	OPCML	MAML2	XAF1
EPHA3	LRRC7	MLLT3	EEPD1	ZBTB16	PCDH11Y	CDH10	EZH2	GABRG3	GPC6	GRIK3	PTPRK	CCSER1	UACA	NOTCH2	LRP1B	PDZD2	TLE4	MAML2	TSHZ2	SAMD4A
NRN1	PALMD	GNAL	COL27A1	TRPM3	CSGALNACT1	RUNX1T1	MRC2	PDE1A	SYNE2	NLGN1	OPCML	ZFHX3	NOTCH2	CREB5	HAS2	PCDH11Y	GUCY1A2	CNTN1	PLCE1	BRIP1
THSD7A	VCAN	CACNA2D1	CREB5	THRB	RORB	NRCAM	AC131571.1	CLSTN2	CHD7	LINC02770	PPFIBP1	MGAT4C	VCAN	RGS20	ALCAM	GNAL	LRRTM3	SORCS3	ITPR1	ZFP36L1
INTU	HAS2	VCAN	NOTCH2	NPAS3	FRMD4B	PLEKHH2	DLGAP5	FLRT2	ADAMTS6	PDE1A	CSGALNACT1	GUCY1A2	COL4A6	CENPF	PCDH17	NTNG1	SULF1	FRMD4B	DCLK2	LRIG1
PALMD	SLC24A4	MYT1L	IQGAP2	SLC4A4	SYBU	BCL11B	DIAPH3	SEMA3E	COL4A6	CSGALNACT1	ZNF804B	TENM2	ZBTB20	UTRN	SPATA6	MYT1L	FOXP1	DOCK10	PON2	RRM2
UACA	GRIK1	EPHA6	AHI1	MOB3B	NECAB1	GAD1	ZFHX4	ZNF385D	MEIS2	XKR4	DAB1	PTPRD	MOB3B	CENPE	CSGALNACT1	SORCS1	PTPRZ1	KCNMA1	EBF1	PAPPA2
PRSS12	NELL2	RUNX1T1	PREX2	SYT1	CHRM3	QKI	AC004158.1	PRICKLE2	MLLT3	TMEM178A	SCN9A	CNTNAP4	GLI3	SMOC1	BMP7	GRM5	EFNA5	GRIK3	GUCY1A2	BLM
TTYH2	FRMD4B	FLRT2	ACSBG1	ARX	PCSK2	CHD7	FAT3	DAB1	COL4A5	ATP2C2	RSPO3	XKR4	SAMD4A	MOB3B	GRID2	NOS1	CPNE8	ATP2C2	PLXDC2	ZBTB20
SMOC1	MLLT3	TAFA1	KCNMA1	UTRN	FOXP1	CPNE8	TFAP2C	TENM2	PTPRK	C8orf34	PCDH11Y	RELN	EEPD1	APOLD1	PTPRT	KAZN	NELL2	SPON1	ITGA2	ITGAX
ELAVL2	RUNX1T1	EPHA3	MEIS2	KIAA1217	TENM2	ANK3	TMEM132D	GRM5	PLCE1	CNTN1	ARHGAP20	LSAMP	SYNE2	GLI3	SULF2	GABRG3	CLSTN2	GRIK1	NOTCH2	DCLK2
CDH4	LIMCH1	CPNE8	FOXP1	ERBB4	ABLIM1	ZFHX3	KNL1	NTRK2	ZFHX4	MGAT4C	ANK3	NRXN3	FSTL1	FSTL1	RYR3	GPC5	KAZN	CLSTN2	CSGALNACT1	ADGRV1
SFRP1	LRP8	MEF2C	SLC6A1	EPHA6	ANK3	BRINP2	GLI3	CNTNAP5	PCDH17	CSMD1	ZNF385B	NTM	NPAS3	CA12	NTNG1	GPR149	MEG3	DCLK2	TTYH2	HS3ST4
DNAH10	ST18	TENM4	BOC	PLXNA2	EPHA6	DLX6-AS1	COL9A1	ADAMTS6	PDGFD	GAS7	CCBE1	LRRTM3	C1orf61	ZFHX4	FAT3	LRRTM3	GRIK3	CPNE8	ID4	FGD2
ZFHX4	NTM	PTPRZ1	ADGRV1	ELAVL2	CELF2	LRP8	PLCE1	SORCS3	IQGAP2	PDZD2	DOCK9	GRIK3	TMEM132D	TMEM132D	LUZP2	TRPM3	TNR	LUZP2	PTPRD	APBB1IP
GRIK1	CFAP47	PRSS12	LIPG	CNTNAP5	DOCK9	CNTNAP5	UTRN	PCDH9	NTM	ST18	RUNX1T1	GRM5	PON2	CNR1	PLCE1	NGEF	ZNF385B	NTM	SLC24A4	FYB1
CARMN	ACTN2	PPFIBP1	CNTLN	PAPPA2	TNR	ST18	LRIG1	ARHGAP20	SOX6	PRICKLE2	TENM2	PCSK2	ATAD2	FRMD4B	ATP2C2	PBX3	GPC6	PDGFRA	GRM3	TPX2
SLC1A3	GRID2	GRID2	COL11A1	TMEM178A	SULF1	ZNF385D	RGS20	TRPM3	KCNJ6	MEF2C	CNTN1	ZNF385D	SFRP1	NPAS3	COL27A1	ELAVL2	PDE1A	PPFIBP1	NTNG1	ARHGAP20
SYNE2	ITPR2	SEMA3C	RGS20	EPHA3	MGAT4C	PCDH9	CACNA2D1	PAPPA2	DCLK2	DPP10	MYT1L	RYR3	LRIG1	IQGAP2	LRIG1	ZNF804B	GRIK2	ADARB2	PLPP3	LMO3
BRCA2	CCDC175	ABLIM1	TMEM132B	BCL11B	RYR2	CACNA2D1	CNTLN	PTPRD	DISP3	PCSK2	SLC26A4	MEIS2	BRCA2	EGFR	SCN1A	UNC13C	CNTNAP4	ALCAM	PDGFRB	PEX5L
CENPE	APBB1IP	DOCK9	MOXD1	ITGAX	ZNF385B	CCSER1	COL11A1	PEX5L	AC131571.1	SLC26A4	RAPGEF5	ALCAM	KIF14	KNL1	NRCAM	ZNF385B	GAS7	ITGA2	RGS6	COL25A1
DCLK2	AL512590.3	CNTN4	ITGA2	EZH2	LIMCH1	SGO2	PTPRK	RYR3	APOLD1	CDH10	NWD2	KCNMA1	ACSBG1	NLGN1	SLC4A4	SYT10	TAFA1	SAMD4A	ATP1A2	SCN9A
SLC24A4	DLGAP5	SYBU	SLCO1C1	PLXDC2	NTM	VCAN	EGFR	GNAL	INTU	ANK3	NTRK2	IKZF1	AC131571.1	CNTLN	BOC	EML6	XKR4	ST18	FRMD4B	SLC24A4
ZFP36L2	RELN	EZH2	TFAP2C	MAML2	ITPR1	EGFR	QKI	NPAS2	CLSPN	NPAS2	MGAT4C	VCAN	DIAPH3	FAT3	NTM	RAPGEF5	NPR 3.00	MRC2	MAST4	COL19A1
PDGFRA	AFF3	SLA	UACA	QKI	KHDRBS3	XKR4	UACA	C8orf34	EML6	DOCK9	SYT1	CNTNAP2	BRIP1	FOXP1	NFIA	TSHZ2	RORB	PTPRT	MOB3B	ID4
RELN	TMEM132B	GTSE1	NPAS3	MEG3	ACTN2	SLC4A4	DLX6-AS1	GRID2	PALMD	SULF1	GRM3	HTR2C	ITGA2	PLEKHH2	NOTCH2	TNR	CSMD1	PON2	PRICKLE2	LIPG
TENM4	MEG3	DNAH10	COL9A1	COL11A1	PDZD2	SLC8A1	TTYH2	NECAB1	DOK6	NPR 3.00	KAZN	NOS1	SLCO1C1	ZNF704	EEPD1	KIAA1217	SEMA3E	SORCS1	PDE8B	DIAPH3
GRIA1	DOK6	GRIA4	ATP1A2	ZFHX3	CPNE8	CCN1	LRRC3B	KHDRBS3	THSD7A	ALCAM	GPC6	GRM3	CNTLN	GPC6	SULF1	KCNJ6	SORCS1	COL27A1	BLM	SOX6
ITPR2	SGO2	CELF2	SYNE2	NOS1	CSMD1	SEMA3E	CA12	TLE4	TMEM132B	COL19A1	RORB	ITPR1	TOP2A	SGO2	SHROOM3	CNTN1	NECAB1	XKR4	ZNF704	STRIP2
CACNA2D1	ARPP21	ZFHX3	ZFHX4	PDGFD	XKR4	PDGFRB	CHD7	DLC1	SEMA5B	PTPRD	CHRM3	PDE8B	AC004158.1	PARD3B	PON2	RYR2	LRRC4C	SCN9A	PLEKHH2	AC004158.1
PLXNA4	MIR503HG	RORB	PON2	ZFP36L1	FLRT2	POLQ	PTPRD	PCDH17	CACNA1A	ZNF385D	NECAB1	EBF1	TPX2	PON2	HTR2C	GPC6	GRM3	ANK3	BRINP2	PDGFD
XRCC2	DISP3	ID4	TMEM132D	RELN	EFNA5	NWD2	BOC	SCN9A	PBX3	ABLIM1	ID4	MEG3	RRM2	PLPP3	LRRC3B	SYNE2	UNC13C	PCDH15	SEMA3E	NLGN1
ST18	ITPR1	TNR	PLCE1	HTR2C	ALCAM	CFAP47	AC006296.3	NLGN1	AC004158.1	COL25A1	CNTN4	SPON1	FOXP1	BRCA2	DLG2	PCDH9	GRID2	ARHGAP20	XKR4	PCSK2
MEG3	SCN1A	GRIK1	ARX	EFNA5	CDH10	NTNG1	DCLK2	CELF4	COL11A1	CHRM3	TSHZ2	SYBU	MOXD1	GTSE1	CSMD1	SORCS3	FRMD4B	CNTNAP2	PLXNA2	SPON1
C1orf61	SYT1	PLXNA2	MOB3B	GRM5	CNTNAP2	TSHZ2	COL1A2	GUCY1A2	TMEM178A	COL12A1	GNAL	SYNE2	EGFR	MAST4	ADGRV1	GRIK2	SPHKAP	EGFR	TNR	TFAP2C
MIR503HG	FAT3	TSHZ2	VCAN	FOS	PPFIBP1	PDE8B	SGO2	SYT1	SAMD4A	CNTNAP5	LMO3	CHRM3	LSAMP	EEPD1	AHI1	SLC24A4	FLRT2	TAFA1	PEX5L	NPR 3.00
SEMA5B	XAF1	CNTN1	SEMA5B	CTXND1	GRM5	ELAVL2	CLSPN	FOXP1	LRIG1	GUCY1A2	DLC1	SYT10	KNL1	NUSAP1	LRRTM3	ERBB4	RGS6	PLXDC2	MEF2C	EZH2
C21orf58	DLC1	DLGAP5	MRC2	GPC6	SYT1	SOX6	XRCC2	LMO3	PLXDC2	PCDH11Y	CSMD1	PCDH15	LINC01965	ITGA2	CDH10	SPON1	HAS2	CHD7	EGFR	TNC
LRRC7	CARMN	BCL11B	ARAP2	DLGAP5	LRRC7	ITPR2	GPC6	LRRTM3	VCAN	ARHGAP20	LRRC7	RIMS2	COL27A1	MRC2	PDGFRA	NTRK2	SCN9A	SPATA6	DIAPH3	ST18
TFAP2C	ITGAX	SLC26A4	DIAPH3	GRID2	PCDH9	SYT10	TOP2A	MEF2C	NLGN1	EFNA5	CELF4	CDH10	ZFHX4	DIAPH3	EGFR	PRICKLE2	NPAS2	C21orf58	ZBTB20	PRSS12
COL9A1	NWD2	FGD2	PAX6	CELF4	NTRK2	DCLK2	BRCA2	ALCAM	STRIP2	CNTNAP4	THSD7A	INTU	CREB5	ADAMTS6	CHD7	LUZP2	KCNMA1	MIR503HG	CENPF	ABLIM1
SCN1A	PAPPA2	PALMD	TNC	ZNF804B	DLG2	TENM2	INTU	MEG3	FYB1	LRP1B	PCDH9	ADGRV1	PAX6	MLLT3	C8orf34	CPNE8	AL512590.3	TPX2	AHI1	CNTN1
CENPF	NOS1	SCN9A	SOX6	COL19A1	PTPRK	IKZF1	CREB5	PDE8B	PAX6	CLSTN2	KHDRBS3	CLSPN	CCDC175	POLQ	PTPRK	ALCAM	NLGN1	PLPP3	NFIA	TSHZ2
CLSPN	TOP2A	SYT10	ID4	MEF2C	OPCML	GRIK3	EOMES	DOK6	ZFHX3	SORCS1	RGS20	PTPRT	TNC	KAZN	RORB	RGS6	LMO3	ZFP36L1	CELF4	NOS1
EZH2	SPON1	ACTN2	NRCAM	COL1A2	SLC26A4	CLSPN	ARAP2	LIMCH1	C21orf58	DLG2	CENPF	PDGFRB	NRCAM	CACNA2D1	CNTLN	TOP2A	CCBE1	DIAPH3	COL25A1	PIF1
AHI1	FOS	LRRC3B	SFRP1	CNTN4	SEMA3E	C1orf61	PON2	AFF3	LINC01965	LRRTM3	C8orf34	TSHZ2	DLGAP5	COL4A6	SLC24A4	CNTN4	CENPE	KNL1	MYT1L	C21orf58
GPC6	FLRT2	XKR4	FAT3	CENPE	SATB2	SCN9A	ITGA2	BACE2	MAML2	NTRK2	PIF1	GTSE1	MGAT4C	PTPRK	RGS6	DLC1	TMEM178A	COL19A1	THSD7A	NRP1
ITGAX	GTSE1	COL11A1	ZFP36L1	APOLD1	THRB	MEG3	TENM4	CSMD1	APBB1IP	CCSER1	ITPR1	LRP1B	SPATA6	MOXD1	FSTL1	MAML2	KHDRBS3	ZBTB16	ASPM	LTBP1
PIF1	LMO3	CHD7	PDGFD	SEMA5B	GRM3	XRCC2	KIF14	NELL2	CCDC175	MYT1L	XRCC2	PRICKLE2	COL4A5	EOMES	COL4A5	SULF1	PCDH15	PARD3B	ZFHX3	PCDH15
ASPM	SLCO1C1	CFAP47	CCDC175	DLGAP2	PTPRZ1	DOCK10	NLGN1	CREB5	GLI3	RYR3	ZBTB20	CELF4	PDGFD	SAMD4A	ACSBG1	NPAS2	HS3ST4	PDE8B	SYNE2	EGFR
SYT1	C21orf58	KCNJ6	ATAD2	C21orf58	AFF3	PCSK2	NRN1	CELF2	UACA	CELF4	COL19A1	PLEKHH2	GAS7	TMEM178A	COL4A6	DLGAP2	PCDH11Y	SLC24A4	STRIP2	XRCC2
AC006296.3	UACA	CLSPN	SLC1A3	C1orf61	LRP1B	XAF1	KIF18B	NPR 3.00	COL19A1	AFF3	SATB2	ZFHX4	ATP1A2	BCL11B	CFAP47	COL19A1	TPX2	SLCO1C1	COL4A5	GPC5
CHD7	KCNJ6	AL512590.3	LRRTM3	VCAN	CENPE	KIF14	TMEM178A	CENPE	TLE4	PCDH9	COL1A2	COL1A2	LIPG	PBX3	TSHZ2	PDE1A	ID4	NRCAM	ATP2C2	TMEM132B
CA12	BCL11B	ITGAX	SLC4A4	UACA	EOMES	CNTNAP4	FGD2	CCN1	SLC1A3	DLC1	EBF1	KIF18B	CLSPN	ATAD2	UACA	OPCML	PLCE1	KAZN	ZNF385D	RIPOR2
ATP1A2	GUCY1A2	CHRM3	CCN1	EOMES	CCSER1	KNL1	ARX	ID4	EBF1	NGEF	EGFR	GABRG3	NTNG1	COL27A1	PDGFRB	C21orf58	PLPP3	KHDRBS3	UNC13C	TOP2A
PAX6	GRIA1	C21orf58	CA12	CFAP47	BCL11B	SMOC1	PLEKHH2	NGEF	FGD2	GTSE1	PDGFRB	GRIK2	SEMA5B	BMP7	SYT10	PLEKHH2	NFIA	BMP7	SLC26A4	HTR2C
XAF1	COL9A1	PLXDC2	FOS	PDGFRA	DAB1	OCA2	PDGFD	ABLIM1	ITGA2	TNR	GAD1	STRIP2	ADAMTS6	ASPM	PLXDC2	SPHKAP	SLIT3	MOXD1	SLIT3	ZNF385D
BRIP1	ZFP36L2	FYB1	EGFR	CDH10	PCDH17	SYT1	PDGFRB	AL512590.3	SYT1	GNAL	AFF3	TPX2	PDE8B	KIAA1217	GRM5	UTRN	NUSAP1	CNTNAP4	FOS	NECAB1
MAST4	COL11A1	RSPO3	THSD7A	XAF1	LUZP2	RRM2	GTSE1	PCDH11Y	DLX6-AS1	NRCAM	CLSTN2	DOCK9	COL1A2	LRP8	DPP10	CHRM3	RYR2	GRIK2	NRCAM	NUSAP1
NPR 3.00	GAD1	NUSAP1	LSAMP	PLEKHH2	PTPRT	ASPM	MOXD1	TMEM178A	NRCAM	THSD7A	GRID2	SCN9A	ADGRV1	RELN	LRRC4C	PRSS12	AC004158.1	RELN	HS3ST4	RYR2
ATAD2	XRCC2	SEMA3E	PTPRK	BRIP1	RYR3	EZH2	LTBP1	ZBTB20	NOS1	ID4	KIF18B	SLC8A1	SLC24A4	DLX6-AS1	TAFA1	PEX5L	NGEF	AC004158.1	ERBB4	XKR4
EOMES	CNR1	PDGFRB	SCN1A	SCN9A	SCN9A	MYT1L	CENPF	ASPM	PON2	SYBU	XKR4	KIF14	LRRC3B	NPR 3.00	EBF1	SEMA3E	CNTNAP5	GRIA4	COL11A1	NOTCH2
PLXDC2	PLXDC2	CENPE	SLC8A1	INTU	RUNX1T1	CTXND1	TMEM132B	XKR4	CNTLN	MAML2	UNC13C	AL512590.3	PREX2	MGAT4C	GPC6	BCL11B	KIAA1217	COL12A1	PAPPA2	IQGAP2
NOS1	TTYH2	ZFP36L1	BRIP1	ADAMTS6	BACE2	DISP3	BMP7	LSAMP	SLCO1C1	PTPRZ1	CLSPN	SLC24A4	ZFP36L2	PDGFRA	GRM3	ZFHX3	SYBU	GRM5	SLC1A3	KAZN
DLX6-AS1	FYB1	ITPR2	MGAT4C	DOCK10	PAPPA2	RGS20	STRIP2	LRRC4C	ZFP36L2	SULF2	SORCS3	TMEM178A	TMEM132B	C21orf58	MIR503HG	C1orf61	GNAL	NTRK2	BCL11B	CCSER1
NUSAP1	SEMA5B	CARMN	NTNG1	SGO2	KAZN	COL25A1	RORB	PDZD2	ATP1A2	SYT1	SLC8A1	APOLD1	BOC	SLCO1C1	LTBP1	CENPE	GPC5	EML6	KIAA1217	RIMS2
NLGN1	NLGN1	TOP2A	CARMN	PEX5L	NGEF	BOC	SFRP1	CSGALNACT1	KNL1	LIPG	GRIK1	EZH2	PLXDC2	COL4A5	MOB3B	HS3ST4	EBF1	UACA	EZH2	GNAL
PDGFD	EBF1	CACNA1A	DCLK2	RGS20	DPP10	BLM	C21orf58	TMEM132B	PLXNA4	GRM3	XAF1	EEPD1	ACTN2	COL12A1	AC004158.1	FGD2	CLSPN	OCA2	GTSE1	MRC2
ERBB4	STRIP2	ATP1A2	ITPR2	NECAB1	LSAMP	GRIA4	NOTCH2	KCNJ6	CELF4	RGS6	DLX6-AS1	RIPOR2	SLC6A1	SLIT3	TMEM132B	SCN9A	BRIP1	UTRN	TMEM178A	CA12
AL512590.3	COL1A2	RIMS2	ALCAM	CDH9	PDGFRA	HAS2	EBF1	PPFIBP1	QKI	PLEKHH2	ACTN2	ITGA2	NRN1	VCAN	ZFHX3	CLSPN	PCDH9	TRPM3	CDH10	CNTLN
CFAP47	MAST4	PEX5L	APOLD1	PIF1	STRIP2	AC006296.3	CNR1	CENPF	COL1A2	CCBE1	EFNA5	CSMD1	ARX	PDGFRB	ZBTB16	ADAMTSL3	KIF14	DLG2	MEG3	KNL1
NOTCH2	KNL1	CCDC175	GAS7	APBB1IP	CFAP47	LRIG1	ST8SIA5	COL1A2	ANK3	KCNJ6	CENPE	SFRP1	NUSAP1	EML6	BACE2	CELF4	INTU	GPC6	CCSER1	ZBTB16
COL11A1	KIF18B	SLC4A4	ZFP36L2	FYB1	LRRC3B	CNTNAP2	PLXNA2	MLIP	AL512590.3	PCDH15	CCN1	CNTN1	CA12	SEMA5B	C21orf58	CENPF	ACSBG1	TMEM178A	BMP7	LRP8
FYB1	DLX6-AS1	DLX6-AS1	EZH2	CLSTN2	RIMS2	LUZP2	NPAS3	FOS	C1orf61	GPC6	PDE8B	PLXDC2	TFAP2C	BRINP2	ACTN2	CLSTN2	DLGAP5	UNC13C	CELF2	MGAT4C
TMEM132B	SPATA6	CENPF	RIPOR2	ANK3	TOP2A	CNR1	COL27A1	RRM2	EZH2	XRCC2	ZFP36L1	SLC6A1	SCN1A	LRIG1	KIF18B	CNTNAP2	AC006296.3	PDGFRB	CENPE	SLC4A4
BLM	RORB	CDH10	ADAMTS6	CHRM3	DLC1	FYB1	DISP3	PLEKHH2	RELN	DLX6-AS1	FYB1	OCA2	CARMN	COL9A1	TLE4	NWD2	COL25A1	SEMA3E	APOLD1	CLSPN
CELF2	ATP1A2	DLG2	CHD7	SULF1	COL12A1	C21orf58	SLC1A3	DLX6-AS1	CLSTN2	BRINP2	FOS	DLC1	XRCC2	HTR2C	NRXN3	ST18	GTSE1	NECAB1	LSAMP	DISP3
APBB1IP	PDGFRB	ADARB2	INTU	SYT10	LRRTM3	DLG2	VCAN	ZBTB16	EOMES	CENPF	CCSER1	PCDH9	ST8SIA5	SEMA3E	ZBTB20	PALMD	SGO2	ADAMTS6	BRIP1	KIF18B
ZFP36L1	PLEKHH2	SLC24A4	DLG2	PDE1A	CLSTN2	AHI1	ST18	FYB1	DIAPH3	MEG3	BCL11B	PBX3	BACE2	ZFP36L1	EZH2	DLGAP5	TTYH2	KIAA1217	LRRC3B	DLGAP5
FOS	ADAMTSL3	CLSTN2	AC004158.1	MOXD1	XAF1	COL1A2	ADAMTS6	CDH9	SLC26A4	POLQ	OCA2	SPATA6	ARAP2	KHDRBS3	THSD7A	PREX2	CTXND1	NPAS3	ADAMTSL3	DLG2
AC131571.1	SLC1A3	ADGRV1	DLX6-AS1	FGD2	CENPF	TPX2	PLPP3	CCDC175	FAT3	GRIK2	AL512590.3	MEF2C	STRIP2	EBF1	BCL11B	AC004158.1	BCL11B	MOB3B	SORCS1	ATP1A2
